# Supplementary material for: Effect of the environment on horizontal gene transfer between bacteria and archaea
Source: PeerJ. 2017 Sep 29;5:e3865. doi: 10.7717/peerj.3865 (PMC5624296; doi:10.7717/peerj.3865)
Supplement: Supplemental Information 1 [file peerj-05-3865-s001.xlsx]

## Sheet: Supplemental_Table1
Supplemental Table 1: Relevant information about the archaea and bacteria used in this study
Accession #	organism	domain	group	size (Mb)	# genes	GC%	salinity category	oxygen req	Isolated From	isolation category	temp	opt temp	pathogen in	metabolism	metabolism category	pH category	Reference
BA000002	Aeropyrum pernix K1	Archaea	Crenarchaeota	1.7	1752	56.3	Moderate	Aerobic	hydrothermal vent	hydrothermal vent	Hyperthermophilic	90-95	No	heterotroph	heterotroph	normal
NC_000917	Archaeoglobus fulgidus DSM 4304	Archaea	Euryarchaeota	2.18	2456	48.6	Moderate	Anaerobic	geothermally heated marine sediments	marine sediment	Hyperthermophilic	83	No	sulfate reducer (autotroph and heterotroph)	chemoautotroph	normal
NC_009954	Caldivirga maquilingensis IC-167	Archaea	Crenarchaeota	2.1	2060	43.1	Non-halophilic	Microaerophilic	acidic hot spring	hot spring	Hyperthermophilic	85	No	heterotroph-- sulfur species	heterotroph	acid
NC_010482	Candidatus Korarchaeum cryptofilum OPF8	Archaea	Korarchaea	1.6	1697	49	Non-halophilic	Anaerobic	hot spring	hot spring	Hyperthermophilic	-	No	heterotroph	heterotroph	normal	Elkins et al 2008 PNAS 105: 8102
NC_009712	Candidatus Methanoregula boonei 6A8	Archaea	Euryarchaeota	2.5	2565	54.5	Non-halophilic	Anaerobic	acidic peat bog	freshwater sediment	Mesophilic	37	No	methanogen	chemoautotroph	acid
NC_011766	Desulfurococcus kamchatkensis 1221n	Archaea	Crenarchaeota	1.4	1441	45.3	Non-halophilic	Anaerobic	hot spring	hot spring	Hyperthermophilic	82	No	peptide fermentation	heterotroph
AY596297	Haloarcula marismortui ATCC 43049	Archaea	Euryarchaeota	4.28	3420	61.1	Extreme halophilic	Aerobic	Dead Sea	salt lake	Mesophilic	40-50	No	heterotroph	heterotroph	normal
NC_010364	Halobacterium salinarum R1	Archaea	Euryarchaeota	2.66	2096	65.7	Extreme halophilic	Facultative	salt fish	salt	Thermophilic	50	No	heterotroph	heterotroph	normal
NC_010364	Halobacterium sp. NRC-1	Archaea	Euryarchaeota	2.57	2098	65.9	Extreme halophilic	Facultative	Dead Sea	salt lake	Mesophilic	42	No	heterotroph	heterotroph	normal
NC_017459	Haloquadratum walsbyi DSM 16790	Archaea	Euryarchaeota	3.18	2699	47.9	Extreme halophilic	Aerobic	solar salterns	salt	Mesophilic	-	No	heterotroph	heterotroph	normal	Bolhuis et al 2004 Environmental Microbiology 6:1287.
NC_008818	Hyperthermus butylicus DSM 5456	Archaea	Crenarchaeota	1.7	1763	53.7	Moderate	Anaerobic	hydrothermal vent	hydrothermal vent	Hyperthermophilic	95-106	No	sulfur reducer	heterotroph	normal
NC_009776	Ignicoccus hospitalis KIN4/I	Archaea	Crenarchaeota	1.3	1499	56.5	Moderate	Anaerobic	hydrothermal vent	hydrothermal vent	Hyperthermophilic	-	No	chemoautotroph makes H2S	chemoautotroph	normal
NC_009440	Metallosphaera sedula DSM 5348	Archaea	Crenarchaeota	2.2	2347	46.2	Non-halophilic	Aerobic	hot spring	hot spring	Thermophilic	70	No	metal oxidizer	heterotroph	acid
NC_009515	Methanobrevibacter smithii ATCC 35061	Archaea	Euryarchaeota	1.9	1792	31	Non-halophilic	Anaerobic	human gut/sewage	Gut	Mesophilic	37-40	No	methanogen	chemoautotroph	normal
NC_000909	Methanocaldococcus jannaschii DSM 2661	Archaea	Euryarchaeota	1.76	1787	31.3	Moderate	Anaerobic	hydrothermal vent	hydrothermal vent	Hyperthermophilic	85	No	methanogen	chemoautotroph	normal
NC_007955	Methanococcoides burtonii DSM 6242	Archaea	Euryarchaeota	2.58	2555	40.8	Moderate	Anaerobic	Antarctic lake	freshwater	Mesophilic	23.4	No	methanogen	chemoautotroph	normal
NC_009635	Methanococcus aeolicus Nankai-3	Archaea	Euryarchaeota	1.6	1544	30	Moderate	Anaerobic	marine sediments	marine sediment	Mesophilic	42	No	methanogen	chemoautotroph	normal
NC_005791	Methanococcus maripaludis S2	Archaea	Euryarchaeota	1.81	1774	33	Moderate	Anaerobic	salt marsh	marine sediment	Mesophilic	-	No	methanogen	chemoautotroph	normal
NC_009634	Methanococcus vannielii SB	Archaea	Euryarchaeota	1.7	1751	31.3	Moderate	Anaerobic	salt marsh	marine sediment	Mesophilic	30	No	methanogen	chemoautotroph	normal
NC_008942	Methanocorpusculum labreanum Z	Archaea	Euryarchaeota	1.8	1862	50	Non-halophilic	Anaerobic	soil	soil	Mesophilic	37	No	methanogen	chemoautotroph	normal
NC_009051	Methanoculleus marisnigri JR1	Archaea	Euryarchaeota	2.5	2468	62.1	Moderate	Anaerobic	Black Sea sediment	marine sediment	Mesophilic	21-25	No	methanogen	chemoautotroph	normal
AE009439	Methanopyrus kandleri AV19	Archaea	Euryarchaeota	1.69	1729	61.2	Moderate	Anaerobic	hydrothermal vent	hydrothermal vent	Hyperthermophilic	98	No	methanogen	chemoautotroph	normal
CP000477	Methanosaeta thermophila PT	Archaea	Euryarchaeota	1.9	1781	53.5	Non-halophilic	Anaerobic	flooded rice paddies	freshwater sediment	Thermophilic	-	No	methanogen	chemoautotroph	normal
NC_003552	Methanosarcina acetivorans C2A	Archaea	Euryarchaeota	5.75	4856	42.7	Moderate	Anaerobic	marine sediments	marine sediment	Mesophilic	35-40	No	methanogen	chemoautotroph	normal
NC_007355	Methanosarcina barkeri str. Fusaro	Archaea	Euryarchaeota	4.84	3953	39.2	Non-halophilic	Anaerobic	freshwater sediment	freshwater	Mesophilic	35-40	No	methanogen	chemoautotroph	normal
NC_003901	Methanosarcina mazei Go1	Archaea	Euryarchaeota	4.1	3492	41.5	Non-halophilic	Anaerobic	soil/sewage	soil	Mesophilic	30-40	No	methanogen	chemoautotroph	normal
NC_007681	Methanosphaera stadtmanae DSM 3091	Archaea	Euryarchaeota	1.77	1586	27.6	Non-halophilic	Anaerobic	human gut	Gut	Mesophilic	36-40	No	methanogen	chemoautotroph	normal
CP000254	Methanospirillum hungatei JF-1	Archaea	Euryarchaeota	3.54	3397	45.1	Non-halophilic	Anaerobic	cow intestines	Gut	Mesophilic	37	No	methanogen	chemoautotroph	normal
NC_000916	Methanothermobacter thermautotrophicus str. Delta H	Archaea	Euryarchaeota	1.8	1858	49.5	Non-halophilic	Anaerobic	sewage	activated sludge	Thermophilic	65-70	No	methanogen	chemoautotroph	normal
NC_007426	Natronomonas pharaonis DSM 2160	Archaea	Euryarchaeota	2.75	2647	63.1	Extreme halophilic	Aerobic	saline lake	salt lake	Mesophilic	-	No	heterotroph	heterotroph	high pH
CP000866	Nitrosopumilus maritimus SCM1	Archaea	Thaumarchaeota	1.6	1840	34.2	Moderate	Aerobic	marine	marine	Mesophilic	-	No	nitrifier	chemoautotroph	normal
NC_005877	Picrophilus torridus DSM 9790	Archaea	Euryarchaeota	1.55	1601	36	Non-halophilic	Aerobic	solfataric soil	soil	Thermophilic	60	No	heterotroph	heterotroph	acid
AE009441	Pyrobaculum aerophilum str. IM2	Archaea	Crenarchaeota	2.2	2706	51.4	Moderate	Facultative	hydrothermal vent	hydrothermal vent	Hyperthermophilic	100	No	heterotroph (denitrifier)	heterotroph	normal
CP000660	Pyrobaculum arsenaticum DSM 13514	Archaea	Crenarchaeota	2.1	2407	55.1	Non-halophilic	Anaerobic	hot spring	hot spring	Hyperthermophilic	-	No	chemoautotroph	chemoautotroph	normal
CP000561	Pyrobaculum calidifontis JCM 11548	Archaea	Crenarchaeota	2	2200	57.2	Non-halophilic	Facultative	hot spring	hot spring	Hyperthermophilic	90-95	No	heterotroph (denitrifier)	heterotroph	normal
NC_008701	Pyrobaculum islandicum DSM 4184	Archaea	Crenarchaeota	1.8	2075	49.6	Non-halophilic	Anaerobic	geothermal power plant water	hot spring	Thermophilic	100	No	chemoautotroph and heterotroph	chemoautotroph	normal
AJ248283	Pyrococcus abyssi GE5	Archaea	Euryarchaeota	1.77	1929	44.7	Moderate	Anaerobic	hydrothermal vent	hydrothermal vent	Hyperthermophilic	103	No	heterotroph	heterotroph	normal
NC_003413	Pyrococcus furiosus DSM 3638	Archaea	Euryarchaeota	1.9	2088	40.8	Moderate	Anaerobic	hydrothermal vent	hydrothermal vent	Hyperthermophilic	100	No	heterotroph	heterotroph	normal
NC_000961	Pyrococcus horikoshii OT3	Archaea	Euryarchaeota	1.7	1890	41.9	Moderate	Anaerobic	hydrothermal vent	hydrothermal vent	Hyperthermophilic	98	No	acetate degrading	heterotroph	normal
NC_009033	Staphylothermus marinus F1	Archaea	Crenarchaeota	1.6	1662	35.7	Moderate	Anaerobic	hydrothermal vent	hydrothermal vent	Hyperthermophilic	92	No	makes H2S	heterotroph	normal
NC_007181	Sulfolobus acidocaldarius DSM 639	Archaea	Crenarchaeota	2.23	2297	36.7	Non-halophilic	Aerobic	hot spring	hot spring	Thermophilic	70-75	No	makes H2S	heterotroph	acid
NC_002754	Sulfolobus solfataricus P2	Archaea	Crenarchaeota	3	3145	35.8	Non-halophilic	Aerobic	hot spring	hot spring	Hyperthermophilic	85	No	makes H2S	heterotroph	acid
NC_003106	Sulfolobus tokodaii str. 7	Archaea	Crenarchaeota	2.7	2911	32.8	Non-halophilic	Aerobic	hot spring	hot spring	Hyperthermophilic	80	No	makes H2S	heterotroph	acid
NC_006624	Thermococcus kodakarensis KOD1	Archaea	Euryarchaeota	2.09	2319	52	Non-halophilic	Anaerobic	hot spring	hot spring	Hyperthermophilic	85	No	heterotroph	heterotroph	normal
NC_011529	Thermococcus onnurineus NA1	Archaea	Euryarchaeota	1.8	2015	51.3	Moderate	Anaerobic	hydrothermal vent	hydrothermal vent	Hyperthermophilic	80	No	CO and heterotrophy	chemoautotroph	normal
NC_008698	Thermofilum pendens Hrk 5	Archaea	Crenarchaeota	1.83	1874	57.6	Non-halophilic	Anaerobic	hot spring	hot spring	Hyperthermophilic	88	No	heterotroph	heterotroph	normal
NC_002578	Thermoplasma acidophilum DSM 1728	Archaea	Euryarchaeota	1.6	1570	46	Non-halophilic	Facultative	compost	compost	Thermophilic	59	No	heterotroph	heterotroph	acid
NC_002689	Thermoplasma volcanium GSS1	Archaea	Euryarchaeota	1.58	1613	39.9	Moderate	Facultative	hydrothermal vent	hydrothermal vent	Thermophilic	60	No	heterotroph	heterotroph	acid
CP001014	Thermoproteus neutrophilus V24Sta	Archaea	Crenarchaeota	1.8	2053	59.9	Non-halophilic	Anaerobic	hot spring	hot spring	Hyperthermophilic	85	No	chemoautotroph (S) and heterotroph	chemoautotroph	normal
NC_009464	Methanocella arvoryzae MRE50	Archaea	Euryarchaeota	3.2	3112	54.6	Non-halophilic	Anaerobic	plant root associated	plant roots	Mesophilic	-	No	methanogen	chemoautotroph	normal	Erkel et al 2006 Science 313: 370.
CM001443	uncultured MGII euryarchaeote	Archaea	Euryarchaeota	2.1	1828	52	moderate	aerobic	marine	marine	Mesophilic		No	photoheterotroph	photoheterotroph	normal
CP002408	Nitrososphaera gargensis Ga9	Archaea	Thaumarchaeota	2.8	3602	48	Non-halophilic	aerobic	hot spring	hot spring	Mesophilic	46	No	ammonia oxidation	chemoautotroph	normal	Spang et al 2012 Enivronmental Microbiology 14:3122.
NC_015931	Pyrolobus fumarii 1A	Archaea	Crenarchaeota	1.8	2038	55	moderate	aerobic	hydrothermal vent	hydrothermal vent	Hyperthermophile	106	No	H2 oxidation	chemoautotroph	normal
NC_013158	Halorhabdus utahensis DSM 12940	Archaea	Euryarchaeota	3.1	3076	63	Extreme halophilic	aerobic	Great Salt Lake sediment	salt lake	Mesophilic		No	heterotroph	heterotroph	normal
DP000238	Cenarchaeum symbiosum A	Archaea	Thaumarchaeota	2	2066	57	Moderate	aerobe	marine sponge Santa Barbara		Mesophilic		No	ammonia oxidation	chemoautotroph	normal
BA000048	Candidatus Caldiarchaeum subterraneum	Archaea	Thaumarchaeota	1.7	1790	52	Non-halophilic	Facultative	subsurface gold mine stream		Thermophilic	70	No		chemoautotroph		Nunoura et al 2011 NucleicAcids Research 39: 3204.
NC_015518	Acidianus hospitalis W1	Archaea	Crenarchaeota	2.1	2404	34	Non-halophilic	Facultative	hot spring	hot spring	Thermophilic	65-95	No	makes H2S	chemoautotroph	acid	You et al 2011 Extremophiles 15:487.
NC_009925	Acaryochloris marina MBIC11017	Bacteria	Cyanobacteria	8.36	8383	47	Moderate	Aerobic	marine	marine	Mesophilic	-	No	photosynthesis	photosynthesis	normal
NC_009484	Acidiphilium cryptum JF-5	Bacteria	Alphaproteobacteria	3.97	3559	67.1	Non-halophilic	Aerobic	coal mine lake sediment	contaminated sediment	Mesophilic	35	No	iron reducer	heterotroph	acid
NC_011761	Acidithiobacillus ferrooxidans ATCC 23270	Bacteria	Gammaproteobacteria	3	3147	58.8	Non-halophilic	Facultative	acid mine drainage	freshwater	Mesophilic	30-35	No	eats H2S and Fe	chemoautotroph	acid
NC_008009	Acidobacteria bacterium Ellin345	Bacteria	Acidobacteria	5.7	4777	58.4	Non-halophilic	Aerobic	soil	soil	Mesophilic	-	No	heterotroph-- eats sugars	heterotroph	normal	Sait et al 2002 Environmental Microbiology 4:654.
NC_008578	Acidothermus cellulolyticus 11B	Bacteria	Actinobacteria	2.4	2157	66.9	Non-halophilic	Aerobic	acidic hot spring	hot spring	Thermophilic	58	No	heterotroph-- cellulolytic	heterotroph	acid
NC_008752	Acidovorax avenae subsp. citrulli AAC00-1	Bacteria	Betaproteobacteria	5.4	4709	68.5	Non-halophilic	Aerobic		pathogen	Mesophilic	-	Fruit		pathogen	normal
NC_008782	Acidovorax sp. JS42	Bacteria	Betaproteobacteria	4.54	4155	66.1	Non-halophilic	Aerobic	contaminated sediment	contaminated sediment	Mesophilic	-	No	heterotroph-- eats aromatics	heterotroph	normal
CP000521	Acinetobacter baumannii ATCC 17978	Bacteria	Gammaproteobacteria	4.02	3367	38.9	Non-halophilic	Aerobic		pathogen	Mesophilic	-	Human		pathogen	normal
NC_005966	Acinetobacter sp. ADP1	Bacteria	Gammaproteobacteria	3.6	3307	40.4	Non-halophilic	Aerobic		pathogen	Mesophilic	37	Human		pathogen	normal
NC_009053	Actinobacillus pleuropneumoniae L20	Bacteria	Gammaproteobacteria	2.3	2012	41.3	Non-halophilic	Facultative		pathogen	Mesophilic	-	Porcine		pathogen	normal
NC_009655	Actinobacillus succinogenes 130Z	Bacteria	Gammaproteobacteria	2.3	2079	44.9	Non-halophilic	Facultative	bovine rumen	Gut	Mesophilic	37	No	makes succinate-- heterotroph	heterotroph	normal
NC_008570	Aeromonas hydrophila subsp. hydrophila ATCC 7966	Bacteria	Gammaproteobacteria	4.7	4122	61.5	Non-halophilic	Facultative		pathogen	Mesophilic	22-28	Animal		pathogen	normal
NC_009348	Aeromonas salmonicida subsp. salmonicida A449	Bacteria	Gammaproteobacteria	5.03	4437	58.2	Non-halophilic	Facultative		pathogen	Mesophilic	-	Fish		pathogen	normal
AE007871	Agrobacterium tumefaciens str. C58	Bacteria	Alphaproteobacteria	5.65	5355	59	Non-halophilic	Aerobic		pathogen	Mesophilic	25-28	Plant		pathogen	normal
NC_010655	Akkermansia muciniphila ATCC BAA-835	Bacteria	Verrucomicrobia	2.7	2138	55.8	Non-halophilic	Anaerobic	human gut	Gut	Mesophilic	37	No	heterotroph	heterotroph	normal
NC_008260	Alcanivorax borkumensis SK2	Bacteria	Gammaproteobacteria	3.1	2755	54.7	Moderate	Aerobic	marine sediment	marine sediment	Mesophilic	-	No	heterotroph-- hydrocarbon degrader	pathogen	normal
NC_008340	Alkalilimnicola ehrlichei MLHE-1	Bacteria	Gammaproteobacteria	3.3	2865	67.5	Extreme halophilic	Facultative	Mono Lake	salt lake	Mesophilic	-	No	chemoautotroph uses arsenite	chemoautotroph	high pH
NC_009633	Alkaliphilus metalliredigens QYMF	Bacteria	Firmicutes	4.9	4625	36.8	Moderate	Anaerobic	borax leachate ponds	contaminated sediment	Mesophilic	-	No	metal reducer	heterotroph	high pH
NC_009922	Alkaliphilus oremlandii OhILAs	Bacteria	Firmicutes	3.1	2836	36.3	Non-halophilic	Anaerobic	Ohio river sediment	freshwater sediment	Mesophilic	-	No	chemoautotroph uses arsenite	chemoautotroph	normal
NC_011138	Alteromonas macleodii 'Deep ecotype'	Bacteria	Gammaproteobacteria	4.4	4072	44.9	Moderate	Aerobic	marine	marine	Mesophilic	-	No	heterotroph	heterotroph	normal
CP000117	Anabaena variabilis ATCC 29413	Bacteria	Cyanobacteria	7.07	5661	41.4	Non-halophilic	Aerobic	freshwater but also found in marine?	freshwater	Mesophilic	-	No	photosynthesis and n fixer	photosynthesis	normal
NC_007760	Anaeromyxobacter dehalogenans 2CP-C	Bacteria	Deltaproteobacteria	5	4346	74.9	Non-halophilic	Facultative	soil	soil	Mesophilic	30	No	metal reducer and dehalogenates	heterotroph	normal
NC_009675	Anaeromyxobacter sp. Fw109-5	Bacteria	Deltaproteobacteria	5.3	4466	73.5	Non-halophilic	Anaerobic	former radionuclide waste pon sediment	contaminated sediment	Mesophilic	-	No	metal reducer	heterotroph	normal
CP000030	Anaplasma marginale str. St. Maries	Bacteria	Alphaproteobacteria	1.2	948	49.8	Non-halophilic	Aerobic		pathogen	Mesophilic	-	Cattle		pathogen	normal
NC_007797	Anaplasma phagocytophilum HZ	Bacteria	Alphaproteobacteria	1.47	1264	41.6	Non-halophilic	Aerobic		pathogen	Mesophilic	37	Human, Animal		pathogen	normal
NC_011567	Anoxybacillus flavithermus WK1	Bacteria	Firmicutes	2.8	2832	41.8	Non-halophilic	Facultative	hot spring	hot spring	Thermophilic	60-65	No	heterotroph and fermentation	heterotroph	normal
NC_000918	Aquifex aeolicus VF5	Bacteria	Aquificae	1.59	1560	43.3	Non-halophilic	Microaerophilic	hot springs	hot spring	Hyperthermophilic	96	No	chemoautotroph uses H2 and O2	chemoautotroph	normal
NC_009850	Arcobacter butzleri RM4018	Bacteria	Epsilonproteobacteria	2.3	2259	27	Non-halophilic	Aerobic		pathogen	Mesophilic	-	Human		pathogen	normal
NC_006513	Aromatoleum aromaticum EbN1	Bacteria	Betaproteobacteria	4.73	4590	64.7	Non-halophilic	Facultative	soil	soil	Mesophilic	26	No	heterotroph-- eats aromatics	heterotroph	normal
NC_008711	Arthrobacter aurescens TC1	Bacteria	Actinobacteria	5.23	4587	62.4	Non-halophilic	Aerobic	soil	soil	Mesophilic	30	No	heterotroph-- xenobiotics	heterotroph	normal
NC_008541	Arthrobacter sp. FB24	Bacteria	Actinobacteria	5.08	4506	65.4	Non-halophilic	Aerobic	soil	soil	Mesophilic	-	No	heterotroph-- hydrocarbon degrader	heterotroph	normal
NC_007716	Aster yellows witches'-broom phytoplasma AYWB	Bacteria	Firmicutes	0.73	693	26.8	Non-halophilic	Aerobic		pathogen	Mesophilic	-	Plant		pathogen	normal
AM406670	Azoarcus sp. BH72	Bacteria	Betaproteobacteria	4.4	3989	67.9	Non-halophilic	Microaerophilic	plant roots endophyte	plant roots	Mesophilic	-	No	N2 fixers	heterotroph	normal
NC_009937	Azorhizobium caulinodans ORS 571	Bacteria	Alphaproteobacteria	5.4	4717	67.3	Non-halophilic	Aerobic	plant associated	plant roots	Mesophilic	-	No	N2 fixers	heterotroph	normal
NC_009725	Bacillus amyloliquefaciens FZB42	Bacteria	Firmicutes	3.9	3693	46.5	Non-halophilic	Aerobic	soil	soil	Mesophilic	-	No		heterotroph	normal
NC_003997	Bacillus anthracis str. Ames	Bacteria	Firmicutes	5.23	5311	35.4	Non-halophilic	Facultative		pathogen	Mesophilic	-	Animal		pathogen	normal
AP007209	Bacillus cereus ATCC 14579	Bacteria	Firmicutes	5.42	5255	35.3	Non-halophilic	Aerobic		pathogen	Mesophilic	25-35	Human		pathogen	normal
NC_006582	Bacillus clausii KSM-K16	Bacteria	Firmicutes	4.3	4096	44.8	Non-halophilic	Facultative	soil	soil	Mesophilic	40	No	heterotroph	heterotroph	high pH
NC_002570	Bacillus halodurans C-125	Bacteria	Firmicutes	4.2	4066	43.7	Non-halophilic	Facultative	soil	soil	Mesophilic	-	No		heterotroph	high pH
NC_006270	Bacillus licheniformis ATCC 14580	Bacteria	Firmicutes	4.2	4178	46.2	Non-halophilic	Facultative		pathogen	Mesophilic	-	Human		pathogen	normal
CP000813	Bacillus pumilus SAFR-032	Bacteria	Firmicutes	3.7	3681	41.3	Non-halophilic	Aerobic	NASA spacecraft	other	Mesophilic	-	No		heterotroph	normal
CP010052	Bacillus subtilis subsp. subtilis str. 168	Bacteria	Firmicutes	4.2	4105	43.5	Non-halophilic	Facultative	created in lab-- X-rays	created	Mesophilic	25-35	No		heterotroph	normal
CP000485	Bacillus thuringiensis str. Al Hakam	Bacteria	Firmicutes	5.36	4798	35.4	Non-halophilic	Facultative		pathogen	Mesophilic	-	Insect		pathogen	normal
NC_010184	Bacillus weihenstephanensis KBAB4	Bacteria	Firmicutes	5.91	5653	35.5	Non-halophilic	Aerobic		pathogen	Mesophilic	-	Human		pathogen	normal
NC_003228	Bacteroides fragilis NCTC 9343	Bacteria	Bacteroidetes/Chlorobi	5.24	4231	43.1	Non-halophilic	Anaerobic		pathogen	Mesophilic	37	Human		pathogen	normal
AE015928	Bacteroides thetaiotaomicron VPI-5482	Bacteria	Bacteroidetes/Chlorobi	6.33	4816	42.9	Non-halophilic	Anaerobic		pathogen	Mesophilic	-	Mammal		pathogen	normal
CP000139	Bacteroides vulgatus ATCC 8482	Bacteria	Bacteroidetes/Chlorobi	5.2	4065	42.2	Non-halophilic	Anaerobic		pathogen	Mesophilic	-	Mammal		pathogen	normal
NC_008783	Bartonella bacilliformis KC583	Bacteria	Alphaproteobacteria	1.4	1283	38.2	Non-halophilic	Aerobic		pathogen	Mesophilic	28	Human		pathogen	normal
NC_005956	Bartonella henselae str. Houston-1	Bacteria	Alphaproteobacteria	1.93	1488	38.2	Non-halophilic	Aerobic		pathogen	Mesophilic	37	Human, Animal		pathogen	normal
NC_005955	Bartonella quintana str. Toulouse	Bacteria	Alphaproteobacteria	1.58	1142	38.8	Non-halophilic	Aerobic		pathogen	Mesophilic	37	Human		pathogen	normal
NC_010161	Bartonella tribocorum CIP 105476	Bacteria	Alphaproteobacteria	2.62	2092	38.8	Non-halophilic	Aerobic		pathogen	Mesophilic	-	Rat		pathogen	normal
NC_007984	Baumannia cicadellinicola str. Hc (Homalodisca coagulata)	Bacteria	Gammaproteobacteria	0.69	595	33.2	Non-halophilic		leafhopper	insect endosymbiont	Mesophilic	-	No		heterotroph	normal
NC_005363	Bdellovibrio bacteriovorus HD100	Bacteria	Deltaproteobacteria	3.8	3587	50.6	Non-halophilic	Aerobic	soil	soil	Mesophilic	28-30	Gram-negative bacteria		heterotroph
NC_008618	Bifidobacterium adolescentis ATCC 15703	Bacteria	Actinobacteria	2.1	1631	59.2	Non-halophilic	Anaerobic	human gut	Gut	Mesophilic	37	No	heterotroph	heterotroph	normal
NC_004307	Bifidobacterium longum NCC2705	Bacteria	Actinobacteria	2.26	1729	60.1	Non-halophilic	Anaerobic	human feces	Gut	Mesophilic	37-41	No	heterotroph	heterotroph	normal
NC_002927	Bordetella bronchiseptica RB50	Bacteria	Betaproteobacteria	5.3	4994	68.1	Non-halophilic	Aerobic		pathogen	Mesophilic	35-37	Animal		pathogen	normal
NC_002928	Bordetella parapertussis 12822	Bacteria	Betaproteobacteria	4.77	4185	68.1	Non-halophilic	Aerobic		pathogen	Mesophilic	35-37	Human, Sheep		pathogen	normal
NC_002929	Bordetella pertussis Tohama I	Bacteria	Betaproteobacteria	4.09	3436	67.7	Non-halophilic	Aerobic		pathogen	Mesophilic	35-37	Human		pathogen	normal
NC_010170	Bordetella petrii DSM 12804	Bacteria	Betaproteobacteria	5.3	5027	65.5	Non-halophilic	Anaerobic	soil	soil	Mesophilic	-	No	heterotroph	heterotroph	normal
NC_008277	Borrelia afzelii PKo	Bacteria	Spirochaetes	1.24	1214	27.8	Non-halophilic	Aerobic		pathogen	Mesophilic	-	Human		pathogen	normal
NC_001318	Borrelia burgdorferi B31	Bacteria	Spirochaetes	1.52	1640	28.2	Non-halophilic	Microaerophilic		pathogen	Mesophilic	-	Human		pathogen	normal
NC_006156	Borrelia garinii PBi	Bacteria	Spirochaetes	0.98	932	28.1	Non-halophilic	Microaerophilic		pathogen	Mesophilic	-	Human		pathogen	normal
NC_004463	Bradyrhizobium japonicum USDA 110	Bacteria	Alphaproteobacteria	9.1	8317	64.1	Non-halophilic	Aerobic	plant symbiont	plant roots	Mesophilic	25-30	No	N fixing	heterotroph	normal
NC_009485	Bradyrhizobium sp. BTAi1	Bacteria	Alphaproteobacteria	8.53	7622	64.8	Non-halophilic	Aerobic	plant symbiont	plant roots	Mesophilic	-	No	photosynthetic and N fixing	photosynthesis	normal
NC_009445	Bradyrhizobium sp. ORS278	Bacteria	Alphaproteobacteria	7.5	6717	65.5	Non-halophilic	Aerobic	plant symbiont	plant roots	Mesophilic	-	No	photosynthetic and N fixing	photosynthesis	normal
NC_006932	Brucella abortus biovar 1 str. 9-941	Bacteria	Alphaproteobacteria	3.29	3085	57.2	Non-halophilic	Facultative		pathogen	Mesophilic	37	Human, Cattle		pathogen	normal
NC_010103	Brucella canis ATCC 23365	Bacteria	Alphaproteobacteria	3.3	3251	57.2	Non-halophilic	Aerobic		pathogen	Mesophilic	-	Dog, Human		pathogen	normal
NC_003318	Brucella melitensis 16M	Bacteria	Alphaproteobacteria	3.29	3198	57.2	Non-halophilic	Aerobic		pathogen	Mesophilic	37	Human, Animal		pathogen	normal
NC_009505	Brucella ovis ATCC 25840	Bacteria	Alphaproteobacteria	3.3	2890	57.2	Non-halophilic	Facultative		pathogen	Mesophilic	37	Sheep		pathogen	normal
NC_017251	Brucella suis 1330	Bacteria	Alphaproteobacteria	3.32	3272	57.3	Non-halophilic	Aerobic		pathogen	Mesophilic	37	Human, Animal		pathogen	normal
NC_002528	Buchnera aphidicola str. APS (Acyrthosiphon pisum)	Bacteria	Gammaproteobacteria	0.66	574	26.4	Non-halophilic		aphid associated	insect endosymbiont	Mesophilic	-	No		heterotroph	normal
NC_008390	Burkholderia ambifaria AMMD	Bacteria	Betaproteobacteria	7.53	6610	66.8	Non-halophilic	Facultative	plant root associated	plant roots	Mesophilic	30-42	No		heterotroph	normal
NC_008060	Burkholderia cenocepacia AU 1054	Bacteria	Betaproteobacteria	7.28	6477	66.9	Non-halophilic	Aerobic		pathogen	Mesophilic	-	Human		pathogen	normal
NC_006348	Burkholderia mallei ATCC 23344	Bacteria	Betaproteobacteria	5.83	5024	68.5	Non-halophilic	Aerobic		pathogen	Mesophilic	-	Human, Animal		pathogen	normal
NC_010804	Burkholderia multivorans ATCC 17616	Bacteria	Betaproteobacteria	6.99	6259	66.7	Non-halophilic	Aerobic		pathogen	Mesophilic	37	Human		pathogen	normal
NC_009076	Burkholderia pseudomallei 1106a	Bacteria	Betaproteobacteria	7.1	7175	68.3	Non-halophilic	Aerobic		pathogen	Mesophilic	-	Animal		pathogen	normal
NC_007510	Burkholderia sp. 383	Bacteria	Betaproteobacteria	8.68	7717	66.3	Non-halophilic	Facultative		pathogen	Mesophilic	-	Human		pathogen	normal
NC_007651	Burkholderia thailandensis E264	Bacteria	Betaproteobacteria	6.72	5634	67.6	Non-halophilic	Aerobic	plant	plant roots	Mesophilic	25-42	No		heterotroph	normal
NC_009256	Burkholderia vietnamiensis G4	Bacteria	Betaproteobacteria	8.4	7617	65.7	Non-halophilic	Facultative		pathogen	Mesophilic	-	Human		pathogen	normal
NC_007951	Burkholderia xenovorans LB400	Bacteria	Betaproteobacteria	9.77	8702	62.6	Non-halophilic	Aerobic		pathogen	Mesophilic	30	Human, Plants		pathogen	normal
NC_009437	Caldicellulosiruptor saccharolyticus DSM 8903	Bacteria	Firmicutes	3	2679	35.3	Non-halophilic	Anaerobic	hot spring	hot spring	Thermophilic	-	No	heterotroph-- cellulolytic	heterotroph	normal
NC_009802	Campylobacter concisus 13826	Bacteria	Epsilonproteobacteria	2.15	1985	39.3	Non-halophilic	Microaerophilic		pathogen	Mesophilic	-	Human		pathogen	normal
NC_009715	Campylobacter curvus 525.92	Bacteria	Epsilonproteobacteria	2	1931	44.5	Non-halophilic	Microaerophilic		pathogen	Mesophilic	-	Human		pathogen	normal
NC_008599	Campylobacter fetus subsp. fetus 82-40	Bacteria	Epsilonproteobacteria	1.8	1719	33.3	Non-halophilic	Microaerophilic		pathogen	Mesophilic	-	Human, Animal		pathogen	normal
NC_009714	Campylobacter hominis ATCC BAA-381	Bacteria	Epsilonproteobacteria	1.7	1687	31.7	Non-halophilic	Anaerobic	human gut	Gut	Mesophilic	37	No		heterotroph	normal
NC_003912	Campylobacter jejuni RM1221	Bacteria	Epsilonproteobacteria	1.8	1838	30.3	Non-halophilic	Microaerophilic		pathogen	Mesophilic	-	Human		pathogen	normal
NC_005061	Candidatus Blochmannia floridanus	Bacteria	Gammaproteobacteria	0.71	583	27.4	Non-halophilic		ant endosymbiont	insect endosymbiont	Mesophilic	-	No		heterotroph	normal
NC_007292	Candidatus Blochmannia pennsylvanicus str. BPEN	Bacteria	Gammaproteobacteria	0.79	610	29.6	Non-halophilic		ant endosymbiont	insect endosymbiont	Mesophilic	-	No		heterotroph	normal
AP009180	Candidatus Carsonella ruddii PV	Bacteria	Gammaproteobacteria	0.16	182	16.6	Non-halophilic		insect endosymbiont	insect endosymbiont	Mesophilic	-	No		heterotroph	normal
NC_010424	Candidatus Desulforudis audaxviator MP104C	Bacteria	Firmicutes	2.3	2157	60.8	Non-halophilic	Anaerobic	deep gold mine	soil	Thermophilic	-	No	sulfate reducer, chemoautotroph	chemoautotroph	high pH	Chivian et al 2008 Science 322:275.
NC_007205	Candidatus Pelagibacter ubique HTCC1062	Bacteria	Alphaproteobacteria	1.3	1354	29.7	Moderate	Aerobic	marine	marine	Mesophilic	-	No	photsynthesis with proteorhodopsin proton pump or heterotrophy	photosynthesis	normal
NC_005861	Candidatus Protochlamydia amoebophila UWE25	Bacteria	Chlamydiae/Verrucomicrobia	2.41	2031	34.7	Non-halophilic	Aerobic		pathogen	Mesophilic	-	Animal		pathogen	normal
NC_008610	Candidatus Ruthia magnifica str. Cm (Calyptogena magnifica)	Bacteria	Gammaproteobacteria	1.2	976	34	Moderate	Aerobic	hydrothermal vent clam symbiont	symbiont	Mesophilic	-	No	sulfide oxidizer	chemoautotroph	normal	Newton et al 2007 Science 315: 998.
CP000770	Candidatus Sulcia muelleri GWSS	Bacteria	Bacteroidetes/Chlorobi	0.25	227	22.4	Non-halophilic		leafhopper symbiont	insect endosymbiont	Mesophilic	-	No		heterotroph	normal
NC_009465	Candidatus Vesicomyosocius okutanii HA	Bacteria	Gammaproteobacteria	1	937	31.6	Non-halophilic	Anaerobic	clam symbiont	symbiont	Mesophilic	-	No	chemoautotroph with H2S	chemoautotroph	normal
NC_007503	Carboxydothermus hydrogenoformans Z-2901	Bacteria	Firmicutes	2.4	2620	42	Non-halophilic	Anaerobic	hot spring	hot spring	Hyperthermophilic	78	No	chemoautotroph uses CO and H2O	chemoautotroph	normal
NC_002696	Caulobacter crescentus CB15	Bacteria	Alphaproteobacteria	4	3737	67.2	Non-halophilic	Aerobic	non-marine aquatic	freshwater	Mesophilic	35	No	heterotroph	heterotroph	normal	Nierman et al 2001 PNAS 98:4136.
NC_010338	Caulobacter sp. K31	Bacteria	Alphaproteobacteria	5.91	5438	67.3	Non-halophilic	Aerobic	groundwater	freshwater	Mesophilic	-	No	heterotroph-- eats aromatics	heterotroph	normal
NC_010995	Cellvibrio japonicus Ueda107	Bacteria	Gammaproteobacteria	4.6	3754	52	Non-halophilic	Aerobic	soil	soil	Mesophilic	-	No	heterotroph-- cellulose degrader	heterotroph	normal
NC_002620	Chlamydia muridarum Nigg	Bacteria	Chlamydiae/Verrucomicrobia	1.08	911	40.3	Non-halophilic	Aerobic		pathogen	Mesophilic	37	Human, Animal		pathogen	normal
NC_010287	Chlamydia trachomatis 434/Bu	Bacteria	Chlamydiae/Verrucomicrobia	1	874	41.3	Non-halophilic	Aerobic		pathogen	Mesophilic	-	Human		pathogen	normal
NC_004552	Chlamydophila abortus S26/3	Bacteria	Chlamydiae/Verrucomicrobia	1.14	932	39.9	Non-halophilic	Aerobic		pathogen	Mesophilic	37	Human, Animal		pathogen	normal
NC_003361	Chlamydophila caviae GPIC	Bacteria	Chlamydiae/Verrucomicrobia	1.18	1005	39.2	Non-halophilic	Aerobic		pathogen	Mesophilic	37	Human, Animal		pathogen	normal
NC_007899	Chlamydophila felis Fe/C-56	Bacteria	Chlamydiae/Verrucomicrobia	1.21	1013	39.3	Non-halophilic	Aerobic		pathogen	Mesophilic	37	Human, Animal		pathogen	normal
AE002161	Chlamydophila pneumoniae AR39	Bacteria	Chlamydiae/Verrucomicrobia	1.23	1112	40.6	Non-halophilic	Aerobic		pathogen	Mesophilic	37	Human		pathogen	normal
NC_007514	Chlorobium chlorochromatii CaD3	Bacteria	Bacteroidetes/Chlorobi	2.6	2002	44.3	Non-halophilic	Anaerobic	lake	freshwater	Mesophilic	-	No	phototroph-- H2S	photosynthesis	normal
NC_008639	Chlorobium phaeobacteroides DSM 266	Bacteria	Bacteroidetes/Chlorobi	3.1	2650	48.4	Moderate	Facultative	Black Sea	marine	Mesophilic	-	No	phototroph-- H2S	photosynthesis	normal
NC_009337	Chlorobium phaeovibrioides DSM 265	Bacteria	Bacteroidetes/Chlorobi	2	1753	53	Moderate	Facultative		marine	Mesophilic	-	No	photosynthesis-- H2S	photosynthesis	normal
NC_002932	Chlorobium tepidum TLS	Bacteria	Bacteroidetes/Chlorobi	2.15	2245	56.5	Non-halophilic	Anaerobic	high S hot spring	hot spring	Thermophilic	48	No	phototroph-- H2S	photosynthesis	normal
NC_010175	Chloroflexus aurantiacus J-10-fl	Bacteria	Chloroflexi	5.3	3853	56.7	Non-halophilic	Facultative	hot spring	hot spring	Thermophilic	52-60	No	photosynthesis	photosynthesis	normal
NC_011026	Chloroherpeton thalassium ATCC 35110	Bacteria	Bacteroidetes/Chlorobi	3.3	2710	45	Moderate	Facultative	marine	marine	Mesophilic	-	No	photosynthesis-- H2S	photosynthesis	normal
NC_005085	Chromobacterium violaceum ATCC 12472	Bacteria	Betaproteobacteria	4.8	4407	64.8	Non-halophilic	Facultative		pathogen	Mesophilic	25	Human		pathogen	normal
NC_007963	Chromohalobacter salexigens DSM 3043	Bacteria	Gammaproteobacteria	3.7	3298	63.9	Extreme halophilic	Aerobic	solar salt facility	salt	Mesophilic	37	No	heterotroph-- eats aromatics	heterotroph	normal
CP000822	Citrobacter koseri ATCC BAA-895	Bacteria	Gammaproteobacteria	4.71	5008	53.8	Non-halophilic	Aerobic		pathogen	Mesophilic	-	Human, Animal		pathogen	normal
NC_009480	Clavibacter michiganensis subsp. michiganensis NCPPB 382	Bacteria	Actinobacteria	3.4	3079	72.5	Non-halophilic	Aerobic		pathogen	Mesophilic	25-28	Tomato		pathogen	normal
NC_003030	Clostridium acetobutylicum ATCC 824	Bacteria	Firmicutes	4.13	3848	30.9	Non-halophilic	Anaerobic	soil	soil	Mesophilic	1965-10-01	No	heterotroph-- eats sugars	heterotroph	normal
NC_009617	Clostridium beijerinckii NCIMB 8052	Bacteria	Firmicutes	6	5020	29.9	Non-halophilic	Anaerobic	soil	soil	Mesophilic	-	No	heterotroph-- eats sugars	heterotroph	normal
NC_009697	Clostridium botulinum A str. ATCC 19397	Bacteria	Firmicutes	3.9	3548	28.2	Non-halophilic	Anaerobic		pathogen	Mesophilic	37	Human		pathogen	normal
AM180355	Clostridium difficile 630	Bacteria	Firmicutes	4.31	3753	29.1	Non-halophilic	Anaerobic		pathogen	Mesophilic	37	Human		pathogen	normal
NC_009706	Clostridium kluyveri DSM 555	Bacteria	Firmicutes	4.06	3913	32	Non-halophilic	Anaerobic	freshwater sediment	freshwater sediment	Mesophilic	-	No	fermentation	heterotroph	normal	Seedorf et al 2008 PNAS 105:2128.
NC_008593	Clostridium novyi NT	Bacteria	Firmicutes	2.5	2315	28.9	Non-halophilic	Anaerobic	bioengineered	created	Mesophilic	-	No		heterotroph	normal
NC_008261	Clostridium perfringens ATCC 13124	Bacteria	Firmicutes	3.3	2876	28.4	Non-halophilic	Anaerobic		pathogen	Mesophilic	37	Human, Animal		pathogen	normal
NC_010001	Clostridium phytofermentans ISDg	Bacteria	Firmicutes	4.8	3902	35.3	Non-halophilic	Anaerobic	soil	soil	Mesophilic	37	No	fermentation	heterotroph	normal
NC_004557	Clostridium tetani E88	Bacteria	Firmicutes	2.87	2432	28.6	Non-halophilic	Anaerobic		pathogen	Mesophilic	37	Human		pathogen	normal
CP000568	Clostridium thermocellum ATCC 27405	Bacteria	Firmicutes	3.8	3189	39	Non-halophilic	Anaerobic	cow/horse manure	compost	Thermophilic	60	No	heterotroph-- cellulolytic	heterotroph	normal
NC_003910	Colwellia psychrerythraea 34H	Bacteria	Gammaproteobacteria	5.37	4910	38	Moderate	Facultative	Arctic sediments	marine sediment	Psychrophilic	8	No	heterotroph	heterotroph	normal
NC_002935	Corynebacterium diphtheriae NCTC 13129	Bacteria	Actinobacteria	2.49	2272	53.5	Non-halophilic	Aerobic		pathogen	Mesophilic	37	Human		pathogen	normal
NC_004369	Corynebacterium efficiens YS-314	Bacteria	Actinobacteria	3.15	2938	63.1	Non-halophilic	Facultative	soil	soil	Mesophilic	30-45	No	heterotroph	heterotroph	normal
NC_009342	Corynebacterium glutamicum R	Bacteria	Actinobacteria	3.35	3080	54.1	Non-halophilic	Facultative	soil	soil	Mesophilic	30-40	No	heterotroph	heterotroph	normal
NC_007164	Corynebacterium jeikeium K411	Bacteria	Actinobacteria	2.48	2120	61.4	Non-halophilic	Facultative		pathogen	Mesophilic	-	Human		pathogen	normal
NC_002971	Coxiella burnetii RSA 493	Bacteria	Gammaproteobacteria	2.03	1848	42.6	Non-halophilic	Facultative		pathogen	Mesophilic	37	Animal, Human		pathogen	normal
NC_008255	Cytophaga hutchinsonii ATCC 33406	Bacteria	Bacteroidetes/Chlorobi	4.4	3785	38.8	Non-halophilic	Aerobic	soil	soil	Mesophilic	30	No	heterotroph-- cellulolytic	heterotroph	normal
NC_007298	Dechloromonas aromatica RCB	Bacteria	Betaproteobacteria	4.5	4171	59.2	Non-halophilic	Facultative	contaminated freshwater	contaminated sediment	Mesophilic	-	No	heterotroph-- benzene oxidizer	heterotroph	normal
NC_002936	Dehalococcoides ethenogenes 195	Bacteria	Chloroflexi	1.47	1580	48.9	Non-halophilic	Anaerobic	contaminated sediment	contaminated sediment	Mesophilic	35	No	heterotroph-- halogens	heterotroph	normal
NC_009455	Dehalococcoides sp. BAV1	Bacteria	Chloroflexi	1.3	1371	47.2	Non-halophilic	Anaerobic	contaminated aquifer	contaminated sediment	Mesophilic	-	No	heterotroph-- halogens	heterotroph	normal
NC_008025	Deinococcus geothermalis DSM 11300	Bacteria	Deinococcus-Thermus	3.25	3054	66.5	Non-halophilic	Aerobic	hot spring	hot spring	Mesophilic	47	No	heterotroph	heterotroph	normal
CP015081	Deinococcus radiodurans R1	Bacteria	Deinococcus-Thermus	3.24	3167	66.6	Non-halophilic	Aerobic	soil	soil	Mesophilic	30-37	No	heterotroph	heterotroph	normal
CP000884	Delftia acidovorans SPH-1	Bacteria	Betaproteobacteria	6.8	6040	66.5	Non-halophilic	Aerobic	soil	soil	Mesophilic	30	No	heterotroph-- xenobiotics	heterotroph	normal
NC_011768	Desulfatibacillum alkenivorans AK-01	Bacteria	Deltaproteobacteria	6.5	5252	54.5	Moderate	Anaerobic	marine estuary sediment	marine sediment	Mesophilic	26-28	No	heterotroph-- hydrocarbon degrader	heterotroph	normal
NC_007907	Desulfitobacterium hafniense Y51	Bacteria	Firmicutes	5.73	5060	47.4	Non-halophilic	Anaerobic	contaminated soil	contaminated sediment	Mesophilic	-	No	heterotroph-- halogens	heterotroph	normal
NC_009943	Desulfococcus oleovorans Hxd3	Bacteria	Deltaproteobacteria	3.9	3265	56.2	Non-halophilic	Anaerobic	oil production plant	oil well	Mesophilic	-	No	heterotroph-- hydrocarbon degrader	heterotroph	normal
NR_076016	Desulfotalea psychrophila LSv54	Bacteria	Deltaproteobacteria	3.64	3234	46.6	Moderate	Anaerobic	marine sediments	marine sediment	Psychrophilic	7	No	sulfate reducer	heterotroph	normal
NC_009253	Desulfotomaculum reducens MI-1	Bacteria	Firmicutes	3.6	3276	42.3	Moderate	Anaerobic	marine sediments	marine sediment	Mesophilic	37	No	metal reducer	heterotroph	normal
NC_007519	Desulfovibrio desulfuricans G20	Bacteria	Deltaproteobacteria	3.73	3775	57.8	Moderate	Anaerobic	oil well	oil well	Mesophilic	25-40	No	sulfate reducer-- uses many electron acceptors including metals and nitrate	heterotroph	normal
NC_008751	Desulfovibrio vulgaris subsp. vulgaris DP4	Bacteria	Deltaproteobacteria	3.7	3091	63.2	Non-halophilic	Anaerobic	soil	soil	Mesophilic	-	No	sulfate reducer	heterotroph	normal
NC_009446	Dichelobacter nodosus VCS1703A	Bacteria	Gammaproteobacteria	1.4	1280	44.4	Non-halophilic	Anaerobic		pathogen	Mesophilic	37	Animal		pathogen	normal
NC_011297	Dictyoglomus thermophilum H-6-12	Bacteria	Dictyoglomi	2	1912	33.7	Non-halophilic	Anaerobic	hot spring	hot spring	Thermophilic	78	No	heterotroph	heterotroph	high pH
NC_011661	Dictyoglomus turgidum DSM 6724	Bacteria	Dictyoglomi	1.9	1744	34	Non-halophilic	Anaerobic	hot spring	hot spring	Thermophilic	-	No	heterotroph	heterotroph	normal
NC_009952	Dinoroseobacter shibae DFL 12	Bacteria	Alphaproteobacteria	4.43	4187	65.5	Moderate	Aerobic	marine dinoflagellate	marine	Mesophilic	33	No	photosynthesis-- anoxygenic	photosynthesis	normal
NC_007354	Ehrlichia canis str. Jake	Bacteria	Alphaproteobacteria	1.3	925	29	Non-halophilic	Aerobic		pathogen	Mesophilic	-	Dog		pathogen	normal
NC_007799	Ehrlichia chaffeensis str. Arkansas	Bacteria	Alphaproteobacteria	1.18	1105	30.1	Non-halophilic	Aerobic		pathogen	Mesophilic	-	Human, Animal		pathogen	normal
NC_006831	Ehrlichia ruminantium str. Gardel	Bacteria	Alphaproteobacteria	1.5	950	27.5	Non-halophilic	Aerobic		pathogen	Mesophilic	-	Ruminant		pathogen	normal
NC_009778	Enterobacter sakazakii ATCC BAA-894	Bacteria	Gammaproteobacteria	4.56	4420	56.7	Non-halophilic	Anaerobic		pathogen	Mesophilic	37	Human		pathogen	normal
NC_009436	Enterobacter sp. 638	Bacteria	Gammaproteobacteria	4.66	4240	52.9	Non-halophilic		plant symbiont in tissue	symbiont	Mesophilic	-	No		heterotroph	normal
NC_004668	Enterococcus faecalis V583	Bacteria	Firmicutes	3.36	3265	37.4	Non-halophilic	Facultative		pathogen	Mesophilic	37	Human		pathogen	normal
NC_004547	Erwinia carotovora subsp. atroseptica SCRI1043	Bacteria	Gammaproteobacteria	5.06	4472	51	Non-halophilic	Facultative		pathogen	Mesophilic	27-30	Plant		pathogen	normal
NC_007722	Erythrobacter litoralis HTCC2594	Bacteria	Alphaproteobacteria	3.05	3011	63.1	Moderate	Aerobic	marine	marine	Mesophilic	-	No	photosynthesis	photosynthesis	normal
CP014272	Escherichia coli K12	Bacteria	Gammaproteobacteria	4.6	4126	50.8	Non-halophilic	Facultative	human gut	Gut	Mesophilic	37	No	heterotroph	heterotroph	normal
NC_010556	Exiguobacterium sibiricum 255-15	Bacteria	Firmicutes	3.01	3015	47.7	Non-halophilic	Facultative	permafrost	soil	Psychrophilic	-	No	heterotroph	heterotroph	normal
NC_009718	Fervidobacterium nodosum Rt17-B1	Bacteria	Thermotogae	1.9	1750	35	Non-halophilic	Anaerobic	hot spring	hot spring	Thermophilic	70	No	heterotroph	heterotroph	normal
NC_009441	Flavobacterium johnsoniae UW101	Bacteria	Bacteroidetes/Chlorobi	6.1	5017	34.1	Non-halophilic	Aerobic	soil	soil	Mesophilic	20-30	No	heterotroph-- eats chitin	heterotroph	normal
NC_009613	Flavobacterium psychrophilum JIP02/86	Bacteria	Bacteroidetes/Chlorobi	2.9	2412	32.5	Non-halophilic	Aerobic		pathogen	Psychrophilic	-	Salmonid fish		pathogen	normal
NC_010336	Francisella philomiragia subsp. philomiragia ATCC 25017	Bacteria	Gammaproteobacteria	2	1915	32.6	Non-halophilic	Aerobic		pathogen	Mesophilic	-	Human		pathogen	normal
NZ_CP010288	Francisella tularensis subsp. holarctica	Bacteria	Gammaproteobacteria	1.9	1754	32.2	Non-halophilic	Aerobic		pathogen	Mesophilic	-	Human, Animal		pathogen	normal
NR_076027	Frankia alni ACN14a	Bacteria	Actinobacteria	7.5	6711	72.8	Non-halophilic	Aerobic	tree root symbiont	plant roots	Mesophilic	-	No	N2 fixer	heterotroph	normal
NC_007777	Frankia sp. CcI3	Bacteria	Actinobacteria	5.4	4499	70.1	Non-halophilic	Aerobic	tree root symbiont	plant roots	Mesophilic	-	No	N2 fixer	heterotroph	normal
NC_009921	Frankia sp. EAN1pec	Bacteria	Actinobacteria	9	7191	71.2	Non-halophilic	Aerobic	tree root symbiont	plant roots	Mesophilic	-	No	N2 fixer	heterotroph	normal
NC_003454	Fusobacterium nucleatum subsp. nucleatum ATCC 25586	Bacteria	Fusobacteria	2.17	2067	27.2	Non-halophilic	Anaerobic		pathogen	Mesophilic	37	Human, Animal		pathogen	normal
NC_006510	Geobacillus kaustophilus HTA426	Bacteria	Firmicutes	3.59	3540	52	Moderate	Aerobic	deep marine sediment	marine sediment	Thermophilic	-	No	heterotroph	heterotroph	normal
NC_009328	Geobacillus thermodenitrificans NG80-2	Bacteria	Firmicutes	3.6	3445	48.9	Non-halophilic	Facultative	oil reservoir	oil well	Thermophilic	65	No	heterotroph-- hydrocarbon degrader	heterotroph	normal
NC_011146	Geobacter bemidjiensis Bem	Bacteria	Deltaproteobacteria	4.6	4018	60.3	Non-halophilic	Anaerobic	freshwater sediment	freshwater sediment	Mesophilic	30	No	metal reducer	heterotroph	normal
NC_010814	Geobacter lovleyi SZ	Bacteria	Deltaproteobacteria	3.98	3685	54.7	Non-halophilic	Anaerobic	freshwater sediment	freshwater sediment	Mesophilic	35	No	heterotroph-- halogens	heterotroph	normal
NC_007517	Geobacter metallireducens GS-15	Bacteria	Deltaproteobacteria	4.01	3532	59.5	Non-halophilic	Anaerobic	freshwater	freshwater	Mesophilic	30	No	metal reducer	heterotroph	normal
NC_002939	Geobacter sulfurreducens PCA	Bacteria	Deltaproteobacteria	3.81	3445	60.9	Non-halophilic	Anaerobic	freshwater sediment	freshwater sediment	Mesophilic	30	No	metal reducer	heterotroph	normal
NC_009483	Geobacter uraniireducens Rf4	Bacteria	Deltaproteobacteria	5.1	4357	54.2	Non-halophilic	Microaerophilic	contaminated soil	contaminated sediment	Mesophilic	-	No	metal reducer	heterotroph	normal
BA000045	Gloeobacter violaceus PCC 7421	Bacteria	Cyanobacteria	4.66	4430	62	Non-halophilic	Aerobic	rock	soil	Mesophilic	-	No	photosynthesis	heterotroph	normal
NC_011365	Gluconacetobacter diazotrophicus PAl 5	Bacteria	Alphaproteobacteria		3852		Non-halophilic	Aerobic	plant root associated	plant roots	Mesophilic	30	No	N2 fixation	heterotroph	normal
NC_006677	Gluconobacter oxydans 621H	Bacteria	Alphaproteobacteria	2.92	2664	60.8	Non-halophilic	Aerobic	plant	soil	Mesophilic	25-30	No	heterotroph	heterotroph	normal
NC_008571	Gramella forsetii KT0803	Bacteria	Bacteroidetes/Chlorobi	3.8	3584	36.6	Moderate	Aerobic	marine	marine	Mesophilic	-	No	heterotroph	heterotroph	normal
NC_008343	Granulibacter bethesdensis CGDNIH1	Bacteria	Alphaproteobacteria	2.7	2437	59.1	Non-halophilic	Aerobic		pathogen	Mesophilic	-	Human		pathogen	normal
NC_002940	Haemophilus ducreyi 35000HP	Bacteria	Gammaproteobacteria	1.7	1717	38.2	Non-halophilic	Anaerobic		pathogen	Mesophilic	35-37	Human		pathogen	normal
NC_009566	Haemophilus influenzae PittEE	Bacteria	Gammaproteobacteria	1.8	1619	38	Non-halophilic	Facultative		pathogen	Mesophilic	-	Human		pathogen	normal
NC_008309	Haemophilus somnus 129PT	Bacteria	Gammaproteobacteria	2.01	1798	37.2	Non-halophilic	Facultative		pathogen	Mesophilic	35-37	Human, Animal		pathogen	normal
NC_007645	Hahella chejuensis KCTC 2396	Bacteria	Gammaproteobacteria	7.22	6778	53.9	Moderate	Facultative	marine sediments	marine sediment	Mesophilic	-	No	heterotroph	heterotroph	normal
NC_008789	Halorhodospira halophila SL1	Bacteria	Gammaproteobacteria	2.7	2407	68	Extreme halophilic	Microaerophilic	salt lake mud	salt lake	Mesophilic	-	No	sulfide oxidizer	chemoautotroph	normal
NC_008229	Helicobacter acinonychis str. Sheeba	Bacteria	Epsilonproteobacteria	1.6	1618	38.2	Non-halophilic	Microaerophilic		pathogen	Mesophilic	37	Feline		pathogen	normal
NC_004917	Helicobacter hepaticus ATCC 51449	Bacteria	Epsilonproteobacteria	1.8	1875	35.9	Non-halophilic	Aerobic		pathogen	Mesophilic	37	Animal		pathogen	normal
NZ_CP011330	Helicobacter pylori J99	Bacteria	Epsilonproteobacteria	1.6	1489	39.2	Non-halophilic	Aerobic		pathogen	Mesophilic	37	Human		pathogen	normal
NC_010337	Heliobacterium modesticaldum Ice1	Bacteria	Firmicutes	3.1	3000	57	Non-halophilic	Anaerobic	hot spring	hot spring	Thermophilic	50-52	No	photosynthesis-- anoxygenic and N2 fixation	photosynthesis	normal
NC_009138	Herminiimonas arsenicoxydans	Bacteria	Betaproteobacteria	3.4	3295	54.3	Non-halophilic	Anaerobic	activated sludge	activated sludge	Mesophilic	-	No	heterotroph and Arsenic reducer	heterotroph	normal
CP000875	Herpetosiphon aurantiacus ATCC 23779	Bacteria	Chloroflexi	6.74	5278	50.9	Non-halophilic	Aerobic	freshwater	freshwater	Mesophilic	-	No	heterotroph	heterotroph	normal
NC_011126	Hydrogenobaculum sp. Y04AAS1	Bacteria	Aquificae	1.6	1629	34.8	Non-halophilic	Microaerophilic	hot spring	hot spring	Thermophilic	58	No	chemoautotroph (H2 and O2)	chemoautotroph	normal
NC_008358	Hyphomonas neptunium ATCC 15444	Bacteria	Alphaproteobacteria	3.71	3505	61.9	Moderate	Aerobic	marine	marine	Mesophilic	37	No	heterotroph-- eats aromatics	heterotroph	normal
NC_006512	Idiomarina loihiensis L2TR	Bacteria	Gammaproteobacteria	2.84	2628	47	Extreme halophilic	Aerobic	hydrothermal vent	hydrothermal vent	Mesophilic	1946-04-01	No	fermentation	heterotroph	normal
NC_007802	Jannaschia sp. CCS1	Bacteria	Alphaproteobacteria	4.4	4283	62.2	Moderate	Aerobic	marine	marine	Mesophilic	30	No	photosynthesis-- anoxygenic	photosynthesis	normal
NC_009659	Janthinobacterium sp. Marseille	Bacteria	Betaproteobacteria	4.1	3697	54.2	Non-halophilic	Aerobic	dialysis solution	freshwater	Mesophilic	-	No	heterotroph	heterotroph	normal	Audic et al 2007 PLOS Genetics 3: 1454.
NC_009664	Kineococcus radiotolerans SRS30216	Bacteria	Actinobacteria	4.99	4681	74.2	Moderate	Aerobic	radioactive waste cell	contaminated sediment	Mesophilic	32	No	heterotroph	heterotroph	normal
NC_009648	Klebsiella pneumoniae subsp. pneumoniae MGH 78578	Bacteria	Gammaproteobacteria	5.69	5185	57.1	Non-halophilic	Facultative		pathogen	Mesophilic	37	Human, Animal		pathogen	normal
NC_006814	Lactobacillus acidophilus NCFM	Bacteria	Firmicutes	2	1862	34.7	Non-halophilic	Facultative	human gut	Gut	Mesophilic	25-35	No	fermentation	heterotroph	normal
NC_008497	Lactobacillus brevis ATCC 367	Bacteria	Firmicutes	2.35	2218	46.1	Non-halophilic	Facultative	beer	food	Mesophilic	25-35	No	fermentation	heterotroph	normal
NC_008526	Lactobacillus casei ATCC 334	Bacteria	Firmicutes	2.93	2771	46.6	Non-halophilic	Facultative	cheese	food	Mesophilic	30-40	No	fermentation	heterotroph	normal
NC_008529	Lactobacillus delbrueckii subsp. bulgaricus ATCC BAA-365	Bacteria	Firmicutes	1.9	1721	49.7	Non-halophilic	Facultative	yogurt	food	Mesophilic	42	No	fermentation	heterotroph	normal
NC_008530	Lactobacillus gasseri ATCC 33323	Bacteria	Firmicutes	1.9	1755	35.3	Non-halophilic	Facultative	human gut	Gut	Mesophilic	25-35	No	fermentation	heterotroph	normal
NC_010080	Lactobacillus helveticus DPC 4571	Bacteria	Firmicutes	2.1	1610	37.1	Non-halophilic	Facultative	cheese	food	Mesophilic	-	No	fermentation	heterotroph	normal
NC_005362	Lactobacillus johnsonii NCC 533	Bacteria	Firmicutes	2	1821	34.6	Non-halophilic	Facultative	human gut	Gut	Mesophilic	25-35	No	fermentation	heterotroph	normal
AL935263	Lactobacillus plantarum WCFS1	Bacteria	Firmicutes	3.34	3057	44.4	Non-halophilic	Facultative	human saliva	symbiont	Mesophilic	25-35	No	fermentation	heterotroph	normal
AP014680	Lactobacillus reuteri F275	Bacteria	Firmicutes	2	1900	38.9	Non-halophilic	Facultative	human gut	Gut	Mesophilic	-	No	fermentation	heterotroph	normal
NC_007576	Lactobacillus sakei subsp. sakei 23K	Bacteria	Firmicutes	1.9	1879	41.3	Non-halophilic	Facultative	sausage	food	Mesophilic	-	No	fermentation	heterotroph	normal
NC_007929	Lactobacillus salivarius UCC118	Bacteria	Firmicutes	2.1	2013	33	Non-halophilic	Facultative	human gut	Gut	Mesophilic	-	No	fermentation	heterotroph	normal
NC_009004	Lactococcus lactis subsp. cremoris MG1363	Bacteria	Firmicutes	2.5	2434	35.7	Non-halophilic	Facultative	cheese	food	Mesophilic	40	No	fermentation	heterotroph	normal
NC_008011	Lawsonia intracellularis PHE/MN1-00	Bacteria	Deltaproteobacteria	1.76	1337	33.1	Non-halophilic	Facultative		pathogen	Mesophilic	37	Animal		pathogen	normal
NC_006368	Legionella pneumophila str. Paris	Bacteria	Gammaproteobacteria	3.64	3166	38.3	Non-halophilic	Aerobic		pathogen	Mesophilic	-	Animal		pathogen	normal
NC_002942	Legionella pneumophila subsp. pneumophila str. Philadelphia 1	Bacteria	Gammaproteobacteria	3.4	2942	38.3	Non-halophilic	Aerobic		pathogen	Mesophilic	-	Animal		pathogen	normal
NC_006087	Leifsonia xyli subsp. xyli str. CTCB07	Bacteria	Actinobacteria	2.58	2030	67.7	Non-halophilic	Aerobic		pathogen	Mesophilic	20-25	Plant		pathogen	normal
NC_008510	Leptospira borgpetersenii serovar Hardjo-bovis JB197	Bacteria	Spirochaetes	3.9	2880	40.2	Non-halophilic	Aerobic		pathogen	Mesophilic	-	Cattle, Human		pathogen	normal
NC_005823	Leptospira interrogans serovar Copenhageni str. Fiocruz L1-130	Bacteria	Spirochaetes	4.63	3658	35	Non-halophilic	Aerobic		pathogen	Mesophilic	28-30	Animal		pathogen	normal
NC_010524	Leptothrix cholodnii SP-6	Bacteria	Betaproteobacteria	4.9	4363	68.9	Non-halophilic	Aerobic	freshwater	freshwater	Mesophilic	-	No	metal oxidizer	chemoautotroph	normal
NC_008531	Leuconostoc mesenteroides subsp. mesenteroides ATCC 8293	Bacteria	Firmicutes	2.04	2005	37.7	Non-halophilic	Facultative	pickles	food	Mesophilic	20-30	No	fermentation	heterotroph	normal
NC_003212	Listeria innocua Clip11262	Bacteria	Firmicutes	3.09	3043	37.4	Non-halophilic	Facultative	compost	compost	Mesophilic	30-37	No	heterotroph	heterotroph	normal
NC_003210	Listeria monocytogenes EGD-e	Bacteria	Firmicutes	2.94	2846	38	Non-halophilic	Facultative		pathogen	Mesophilic	30-37	Human		pathogen	normal
NC_008555	Listeria welshimeri serovar 6b str. SLCC5334	Bacteria	Firmicutes	2.8	2774	36.4	Non-halophilic	Facultative	soil/sewage	soil	Mesophilic	-	No	heterotroph	heterotroph	normal
NC_008576	Magnetococcus sp. MC-1	Bacteria	Other Bacteria	4.7	3716	54.2	Moderate	Microaerophilic	estuary	freshwater	Mesophilic	-	No	chemoautotroph-- uses H2S	chemoautotroph	normal
NC_007626	Magnetospirillum magneticum AMB-1	Bacteria	Alphaproteobacteria	5	4559	65.1	Non-halophilic	Microaerophilic	freshwater	freshwater	Mesophilic	-	No	metal reducer	heterotroph	normal
NC_006300	Mannheimia succiniciproducens MBEL55E	Bacteria	Gammaproteobacteria	2.31	2369	42.5	Non-halophilic	Anaerobic	cow intestines	Gut	Mesophilic	37	No	heterotroph	heterotroph	normal
NC_008347	Maricaulis maris MCS10	Bacteria	Alphaproteobacteria	3.37	3063	62.7	Moderate	Facultative	marine	marine	Mesophilic	20-25	No	heterotroph	heterotroph	normal
NC_008740	Marinobacter aquaeolei VT8	Bacteria	Gammaproteobacteria	4.75	4272	56.9	Moderate	Facultative	oil well	oil well	Mesophilic	30	No	heterotroph-- hydrocarbon degrader	heterotroph	normal
NC_009654	Marinomonas sp. MWYL1	Bacteria	Gammaproteobacteria	5.1	4439	42.6	Non-halophilic	Aerobic	plant root associated	plant roots	Mesophilic	-	No	heterotroph	heterotroph	normal
NC_006055	Mesoplasma florum L1	Bacteria	Firmicutes	0.79	682	27	Non-halophilic	Facultative		pathogen	Mesophilic	20-40	Mammal, Insect, Plant		pathogen	normal
NC_002678	Mesorhizobium loti MAFF303099	Bacteria	Alphaproteobacteria	7.6	7272	62.5	Non-halophilic	Aerobic	plant root associated	plant roots	Mesophilic	-	No	N2 fixation	heterotroph	normal
NC_008254	Mesorhizobium sp. BNC1	Bacteria	Alphaproteobacteria	4.94	4543	61.1	Non-halophilic	Aerobic	sewage	activated sludge	Mesophilic	-	No	heterotroph	heterotroph	normal	Payne et al 1998 Journal of Bacteriology 180:3823.
NC_010794	Methylacidiphilum infernorum V4	Bacteria	Verrucomicrobia	2.3	2472	45.5	Non-halophilic	Aerobic	hot spring	hot spring	Thermophilic	-	No	eats methane	chemoautotroph	acid
NC_008825	Methylibium petroleiphilum PM1	Bacteria	Betaproteobacteria	4.6	4449	68.8	Non-halophilic	Facultative	oil well	oil well	Mesophilic	30	No	heterotroph-- hydrocarbon and aromatic degrader	heterotroph	normal
NC_007947	Methylobacillus flagellatus KT	Bacteria	Betaproteobacteria	3	2753	55.7	Non-halophilic	Aerobic	activated sludge	activated sludge	Mesophilic	30-42	No	eats methane	chemoautotroph	normal
NC_011757	Methylobacterium chloromethanicum CM4	Bacteria	Alphaproteobacteria	6.2	5516	68.1	Non-halophilic	Aerobic	contaminated soil	contaminated sediment	Mesophilic	30	No	chloromethane	chemoautotroph	normal
NC_010172	Methylobacterium extorquens PA1	Bacteria	Alphaproteobacteria	5.5	4829	68.2	Non-halophilic	Facultative	plant	soil	Mesophilic	25-30	No	eats methanol	chemoautotroph	normal
NC_010505	Methylobacterium radiotolerans JCM 2831	Bacteria	Alphaproteobacteria	6.92	6431	71	Non-halophilic	Aerobic	plant root associated	plant roots	Mesophilic	-	No	eat methanol N2 fixation	chemoautotroph	normal
NC_010511	Methylobacterium sp. 4-46	Bacteria	Alphaproteobacteria	7.78	6692	71.5	Non-halophilic	Facultative	plant root associated	plant roots	Mesophilic	-	No	eats methanol	chemoautotroph	normal
NC_011666	Methylocella silvestris BL2	Bacteria	Alphaproteobacteria	4.3	3818	63.1	Non-halophilic	Aerobic	soil	soil	Mesophilic	-	No	eats methane	chemoautotroph	normal
NC_002977	Methylococcus capsulatus str. Bath	Bacteria	Gammaproteobacteria	3.3	2956	63.6	Non-halophilic	Aerobic	hot spring	hot spring	Thermophilic	45	No	eats methane	chemoautotroph	normal
NC_010296	Microcystis aeruginosa NIES-843	Bacteria	Cyanobacteria	5.8	6312	42.3	Non-halophilic	Aerobic	freshwater	freshwater	Mesophilic	-	Animal, Human	photosynthesis	photosynthesis	normal
NC_007644	Moorella thermoacetica ATCC 39073	Bacteria	Firmicutes	2.6	2463	55.8	Non-halophilic	Anaerobic	freshwater	freshwater	Thermophilic	58	No	chemoautotroph makes acetate	chemoautotroph	normal
NC_008595	Mycobacterium avium 104	Bacteria	Actinobacteria	5.5	5120	69	Non-halophilic	Aerobic		pathogen	Mesophilic	37	Mammal		pathogen	normal
BX248333	Mycobacterium bovis AF2122/97	Bacteria	Actinobacteria	4.35	3920	65.6	Non-halophilic	Aerobic		pathogen	Mesophilic	37	Human, Animal		pathogen	normal
NC_009338	Mycobacterium gilvum PYR-GCK	Bacteria	Actinobacteria	5.96	5579	67.7	Non-halophilic	Aerobic	river sediment	freshwater sediment	Mesophilic	-	No	heterotroph-- eats aromatics	heterotroph	normal
NC_002677	Mycobacterium leprae TN	Bacteria	Actinobacteria	3.27	1605	57.8	Non-halophilic	Aerobic		pathogen	Mesophilic	37	Human		pathogen	normal
CP001663	Mycobacterium smegmatis str. MC2 155	Bacteria	Actinobacteria	7	6716	67.4	Non-halophilic	Aerobic		pathogen	Mesophilic	37	Human		pathogen	normal
NC_009077	Mycobacterium sp. JLS	Bacteria	Actinobacteria	6	5739	68.4	Non-halophilic	Aerobic	contaminated soil	contaminated sediment	Mesophilic	-	No	heterotroph-- eats aromatics	heterotroph	normal
NC_008705	Mycobacterium sp. KMS	Bacteria	Actinobacteria	6.22	5975	68.2	Non-halophilic	Aerobic	contaminated soil	contaminated sediment	Mesophilic	-	No	heterotroph-- eats aromatics	heterotroph	normal
NC_008146	Mycobacterium sp. MCS	Bacteria	Actinobacteria	5.92	5615	68.4	Non-halophilic	Aerobic	contaminated soil	contaminated sediment	Mesophilic	-	No	heterotroph-- eats aromatics	heterotroph	normal
NC_002755	Mycobacterium tuberculosis CDC1551	Bacteria	Actinobacteria	4.4	4189	65.6	Non-halophilic	Aerobic		pathogen	Mesophilic	37	Human		pathogen	normal
CP000325	Mycobacterium ulcerans Agy99	Bacteria	Actinobacteria	5.6	4160	65.5	Non-halophilic	Aerobic		pathogen	Mesophilic	32	Human		pathogen	normal
NC_008726	Mycobacterium vanbaalenii PYR-1	Bacteria	Actinobacteria	6.5	5979	67.8	Non-halophilic	Aerobic	contaminated soil	contaminated sediment	Mesophilic	24-37	No	heterotroph-- eats aromatics	heterotroph	normal
NC_009497	Mycoplasma agalactiae PG2	Bacteria	Firmicutes	0.88	742	29.7	Non-halophilic	Facultative		pathogen	Psychrophilic	-	Sheep, Goat		pathogen	normal
NC_007633	Mycoplasma capricolum subsp. capricolum ATCC 27343	Bacteria	Firmicutes	1.01	812	23.8	Non-halophilic	Facultative		pathogen	Mesophilic	37	Ruminant		pathogen	normal
NC_004829	Mycoplasma gallisepticum R	Bacteria	Firmicutes	1	726	31.5	Non-halophilic	Facultative		pathogen	Mesophilic	37	Avian		pathogen	normal
NC_006360	Mycoplasma hyopneumoniae 232	Bacteria	Firmicutes	0.89	691	28.6	Non-halophilic	Facultative		pathogen	Mesophilic	37	Swine		pathogen	normal
NC_006908	Mycoplasma mobile 163K	Bacteria	Firmicutes	0.78	633	25	Non-halophilic	Facultative		pathogen	Mesophilic	20	Fish		pathogen	normal
NC_005364	Mycoplasma mycoides subsp. mycoides SC str. PG1	Bacteria	Firmicutes	1.2	1016	24	Non-halophilic	Facultative		pathogen	Mesophilic	37	Cattle		pathogen	normal
NC_004432	Mycoplasma penetrans HF-2	Bacteria	Firmicutes	1.36	1037	25.7	Non-halophilic	Facultative		pathogen	Mesophilic	37	Human		pathogen	normal
NC_000912	Mycoplasma pneumoniae M129	Bacteria	Firmicutes	0.82	689	40	Non-halophilic	Facultative		pathogen	Mesophilic	37	Human		pathogen	normal
NC_002771	Mycoplasma pulmonis UAB CTIP	Bacteria	Firmicutes	0.96	782	26.6	Non-halophilic	Facultative		pathogen	Mesophilic	37	Rodent		pathogen	normal
NC_007294	Mycoplasma synoviae 53	Bacteria	Firmicutes	0.8	659	28.5	Non-halophilic	Facultative		pathogen	Mesophilic	37	Chicken		pathogen	normal
NC_008095	Myxococcus xanthus DK 1622	Bacteria	Deltaproteobacteria	9.1	7331	68.9	Non-halophilic	Aerobic	soil	soil	Mesophilic	20-30	No	bacterial predator	heterotroph	normal	Goldman et al 2006 PNAS 41:15200.
AE004969	Neisseria gonorrhoeae FA 1090	Bacteria	Betaproteobacteria	2.15	2002	52.7	Non-halophilic	Aerobic		pathogen	Mesophilic	35-37	Human		pathogen	normal
NC_010120	Neisseria meningitidis 053442	Bacteria	Betaproteobacteria	2.2	2020	51.7	Non-halophilic	Aerobic		pathogen	Mesophilic	-	Human		pathogen	normal
NC_007798	Neorickettsia sennetsu str. Miyayama	Bacteria	Alphaproteobacteria	0.86	932	41.1	Non-halophilic	Aerobic		pathogen	Mesophilic	-	Human		pathogen	normal
NC_009662	Nitratiruptor sp. SB155-2	Bacteria	Epsilonproteobacteria	1.9	1843	39.7	Moderate	Anaerobic	hydrothermal vent	hydrothermal vent	Thermophilic	-	No	eats H2S (NO3, O2)	chemoautotroph	normal	Nakagawa et al 2005 International journal of systematic and evolutionary microbiology 55:925
NC_007964	Nitrobacter hamburgensis X14	Bacteria	Alphaproteobacteria	5.01	4326	61.6	Non-halophilic	Aerobic	soil	soil	Mesophilic	-	No	nitrifier	chemoautotroph	normal
NC_007406	Nitrobacter winogradskyi Nb-255	Bacteria	Alphaproteobacteria	3.4	3122	62	Non-halophilic	Facultative	soil	soil	Mesophilic	-	No	nitrifier	chemoautotroph	normal
NC_007484	Nitrosococcus oceani ATCC 19707	Bacteria	Gammaproteobacteria	3.54	3017	50.3	Moderate	Aerobic	marine	marine	Mesophilic	-	No	nitrifier	chemoautotroph	normal
NC_004757	Nitrosomonas europaea ATCC 19718	Bacteria	Betaproteobacteria	2.81	2461	50.7	Non-halophilic	Aerobic	soil/sewage	soil	Mesophilic	-	No	nitrifier	chemoautotroph	normal
NC_008344	Nitrosomonas eutropha C91	Bacteria	Betaproteobacteria	2.82	2551	48.5	Non-halophilic	Aerobic	sewage	activated sludge	Mesophilic	-	No	nitrifier	chemoautotroph	normal
NC_007614	Nitrosospira multiformis ATCC 25196	Bacteria	Betaproteobacteria	3.23	2805	53.9	Non-halophilic	Aerobic	soil	soil	Mesophilic	-	No	nitrifier	chemoautotroph	normal
NC_006361	Nocardia farcinica IFM 10152	Bacteria	Actinobacteria	6.29	5936	70.7	Non-halophilic	Aerobic		pathogen	Mesophilic	37	Human, Animal		heterotroph	normal
NC_008699	Nocardioides sp. JS614	Bacteria	Actinobacteria	5.31	4909	71.4	Non-halophilic	Aerobic	contaminated aquifer	contaminated sediment	Mesophilic	30	No	heterotroph-- halogens	heterotroph	normal
NC_003272	Nostoc sp. PCC 7120	Bacteria	Cyanobacteria	7.21	6130	41.3	Non-halophilic	Aerobic	soil	soil	Mesophilic	-	No	photosynthesis-- N2 fixation	photosynthesis	normal
NC_007794	Novosphingobium aromaticivorans DSM 12444	Bacteria	Alphaproteobacteria	4.23	3937	65.1	Non-halophilic	Aerobic	soil	soil	Mesophilic	-	No	heterotroph-- eats aromatics	heterotroph	normal
NC_004193	Oceanobacillus iheyensis HTE831	Bacteria	Firmicutes	3.63	3500	35.7	Moderate	Aerobic	marine sediments	marine sediment	Mesophilic	30	No	heterotroph	heterotroph	normal
NC_009667	Ochrobactrum anthropi ATCC 49188	Bacteria	Alphaproteobacteria	5.22	4799	56.1	Non-halophilic	Facultative	microbial fuel cell	pathogen	Mesophilic	-	Human	heterotroph	heterotroph	normal	Zuo et al 2008 AEM 74: 3130.
NC_008528	Oenococcus oeni PSU-1	Bacteria	Firmicutes	1.8	1691	37.9	Non-halophilic	Facultative	wine	food	Mesophilic	17-25	No	fermentation	heterotroph	normal
NC_015684	Oligotropha carboxidovorans OM5	Bacteria	Alphaproteobacteria	3.7	3722	62.4	Non-halophilic	Anaerobic	wastewater	activated sludge	Mesophilic	-	No	CO and H2	chemoautotroph	normal
NC_005303	Onion yellows phytoplasma OY-M	Bacteria	Firmicutes	0.86	754	27.7	Non-halophilic	Aerobic		pathogen	Mesophilic	-	Onion		pathogen	normal
NC_010571	Opitutus terrae PB90-1	Bacteria	Verrucomicrobia	6	4612	65.3	Non-halophilic	Anaerobic	freshwater sediment	freshwater sediment	Mesophilic	-	No	heterotroph	heterotroph	normal
NC_009488	Orientia tsutsugamushi Boryong	Bacteria	Alphaproteobacteria	2.1	1182	30.5	Non-halophilic	Aerobic		pathogen	Mesophilic	-	Human		pathogen	normal
NC_009615	Parabacteroides distasonis ATCC 8503	Bacteria	Bacteroidetes/Chlorobi	4.8	3850	45.1	Non-halophilic	Anaerobic		pathogen	Mesophilic	-	Mammal		pathogen	normal
NC_008686	Paracoccus denitrificans PD1222	Bacteria	Alphaproteobacteria	5.25	5077	66.8	Non-halophilic	Facultative	soil	soil	Mesophilic	25-30	No	heterotroph	heterotroph	normal
NC_009719	Parvibaculum lavamentivorans DS-1	Bacteria	Alphaproteobacteria	3.9	3636	62.3	Non-halophilic	Aerobic	sewage	activated sludge	Mesophilic	-	No	heterotroph-- xenobiotics	heterotroph	normal
NC_002663	Pasteurella multocida subsp. multocida str. Pm70	Bacteria	Gammaproteobacteria	2.26	2015	40.4	Non-halophilic	Facultative		pathogen	Mesophilic	37	Human, Animal		pathogen	normal
NC_008525	Pediococcus pentosaceus ATCC 25745	Bacteria	Firmicutes	1.8	1755	37.4	Non-halophilic	Facultative	cheese	food	Mesophilic	30	No	fermentation	heterotroph	normal
NC_007498	Pelobacter carbinolicus DSM 2380	Bacteria	Deltaproteobacteria	3.7	3352	55.1	Moderate	Anaerobic	marine sediments	marine sediment	Mesophilic	-	No	Fe and sufur reducer	heterotroph	normal
NC_008609	Pelobacter propionicus DSM 2379	Bacteria	Deltaproteobacteria	4.23	3804	58.5	Moderate	Anaerobic	marine sediments	marine sediment	Mesophilic	30	No	Fe and sufur reducer	heterotroph	normal
NC_007512	Pelodictyon luteolum DSM 273	Bacteria	Bacteroidetes/Chlorobi	2.36	2083	57.3	Moderate	Anaerobic	marine/freshwater	marine	Mesophilic	25	No	photosynthesis-- H2S	photosynthesis	normal
NC_011060	Pelodictyon phaeoclathratiforme BU-1	Bacteria	Bacteroidetes/Chlorobi	3	2707	48.1	Non-halophilic	Anaerobic	freshwater	freshwater	Mesophilic	15-25	No	photosynthesis-- H2S	photosynthesis	normal
NC_009454	Pelotomaculum thermopropionicum SI	Bacteria	Firmicutes	3	2920	53	Non-halophilic	Anaerobic	activated sludge	activated sludge	Thermophilic	55	No	fermentation	heterotroph	normal
NC_010003	Petrotoga mobilis SJ95	Bacteria	Thermotogae	2.2	1898	34.1	Moderate	Anaerobic	oil reservoir	oil well	Thermophilic	-	No	heterotroph	heterotroph	normal
NC_006370	Photobacterium profundum SS9	Bacteria	Gammaproteobacteria	6.38	5489	41.7	Moderate	Facultative	marine sediments	marine sediment	Psychrophilic	15	No	heterotroph	heterotroph	normal
NC_005126	Photorhabdus luminescens subsp. laumondii TTO1	Bacteria	Gammaproteobacteria	5.69	4683	42.8	Non-halophilic	Facultative		pathogen	Mesophilic	-	Insect		pathogen	normal
NC_008781	Polaromonas naphthalenivorans CJ2	Bacteria	Betaproteobacteria	5.35	4929	61.7	Non-halophilic	Aerobic	contaminated freshwater sediment	contaminated sediment	Mesophilic	20	No	heterotroph-- eats aromatics	heterotroph	normal
NC_007948	Polaromonas sp. JS666	Bacteria	Betaproteobacteria	5.9	5453	62	Non-halophilic	Aerobic	contaminated aquifer	contaminated sediment	Mesophilic	20	No	heterotroph-- halogens	heterotroph	normal
NC_009379	Polynucleobacter sp. QLW-P1DMWA-1	Bacteria	Betaproteobacteria	2.2	2077	44.8	Non-halophilic	Aerobic	freshwater	freshwater	Mesophilic	-	No	heterotroph	heterotroph	normal
NC_002950	Porphyromonas gingivalis W83	Bacteria	Bacteroidetes/Chlorobi	2.34	1909	48.3	Non-halophilic	Anaerobic		pathogen	Mesophilic	37	Human		pathogen	normal
NC_005071	Prochlorococcus marinus str. MIT 9313	Bacteria	Cyanobacteria	2.41	2269	50.7	Moderate	Aerobic	marine	marine	Mesophilic	-	No	photosynthesis	photosynthesis	normal
NC_006085	Propionibacterium acnes KPA171202	Bacteria	Actinobacteria	2.56	2297	60	Non-halophilic	Anaerobic		pathogen	Mesophilic	37	Human		pathogen	normal
NC_008228	Pseudoalteromonas atlantica T6c	Bacteria	Gammaproteobacteria	5.19	4281	44.6	Moderate	Aerobic		pathogen	Mesophilic	-	Shellfish		pathogen	normal
NC_007481	Pseudoalteromonas haloplanktis TAC125	Bacteria	Gammaproteobacteria	3.85	3485	40.1	Moderate	Aerobic	marine	marine	Psychrophilic	-	No	chemoautotroph	chemoautotroph	normal
NC_009656	Pseudomonas aeruginosa PA7	Bacteria	Gammaproteobacteria	6.6	6286	66.4	Non-halophilic	Aerobic		pathogen	Mesophilic	25-30	Human		pathogen	normal
NC_008027	Pseudomonas entomophila L48	Bacteria	Gammaproteobacteria	5.9	5134	64.2	Non-halophilic	Aerobic		pathogen	Mesophilic	-	Insect		pathogen	normal
NC_004129	Pseudomonas fluorescens Pf-5	Bacteria	Gammaproteobacteria	7.1	6138	63.3	Non-halophilic	Aerobic	plant root associated	plant roots	Mesophilic	25-30	No	heterotroph	heterotroph	normal
NC_009439	Pseudomonas mendocina ymp	Bacteria	Gammaproteobacteria	5.1	4594	64.7	Non-halophilic	Aerobic		pathogen	Mesophilic	-	Human		pathogen	normal
NC_009512	Pseudomonas putida F1	Bacteria	Gammaproteobacteria	6	5252	61.9	Non-halophilic	Aerobic	freshwater	freshwater	Mesophilic	-	No	heterotroph-- eats aromatics	heterotroph	normal
NC_009434	Pseudomonas stutzeri A1501	Bacteria	Gammaproteobacteria	4.6	4128	63.9	Non-halophilic	Aerobic	plant root associated	plant roots	Mesophilic	-	No	N2 fixation	heterotroph	normal
NC_007005	Pseudomonas syringae pv. syringae B728a	Bacteria	Gammaproteobacteria	6.09	5089	59.2	Non-halophilic	Aerobic		pathogen	Mesophilic	-	Plant		pathogen	normal
CP000082	Psychrobacter arcticus 273-4	Bacteria	Gammaproteobacteria	2.65	2120	42.8	Non-halophilic	Aerobic	permafrost	soil	Psychrophilic	22	No	heterotroph	heterotroph	normal
NC_007969	Psychrobacter cryohalolentis K5	Bacteria	Gammaproteobacteria	3.1	2511	42.2	Moderate	Aerobic	permafrost	soil	Psychrophilic	-	No	heterotroph	heterotroph	normal
NC_009524	Psychrobacter sp. PRwf-1	Bacteria	Gammaproteobacteria	3.02	2385	44.8	Moderate	Aerobic	marine fish gills	symbiont	Mesophilic	1937-04-01	No	heterotroph	heterotroph	normal
NC_008709	Psychromonas ingrahamii 37	Bacteria	Gammaproteobacteria	4.6	3545	40.1	Extreme halophilic	Facultative	sea ice	marine	Psychrophilic	-	No	heterotroph (denitrifier)	heterotroph	normal
NC_005241	Ralstonia eutropha H16	Bacteria	Betaproteobacteria	7	6626	66.3	Non-halophilic	Facultative	activated sludge	activated sludge	Mesophilic	30	No	chemoautotroph and heterotroph	chemoautotroph	normal
NC_007973	Ralstonia metallidurans CH34	Bacteria	Betaproteobacteria	6.91	6319	63.5	Non-halophilic	Facultative	activated sludge	activated sludge	Mesophilic	30	No	chemoautotroph (H2)	chemoautotroph	normal
NC_010682	Ralstonia pickettii 12J	Bacteria	Betaproteobacteria	5.28	4952	63.6	Non-halophilic	Aerobic	freshwater sediment	freshwater sediment	Mesophilic	-	No	heterotroph	heterotroph	normal
NC_003295	Ralstonia solanacearum GMI1000	Bacteria	Betaproteobacteria	5.8	5113	67	Non-halophilic	Aerobic		pathogen	Mesophilic	-	Plant		pathogen	normal
NC_010168	Renibacterium salmoninarum ATCC 33209	Bacteria	Actinobacteria	3.2	3507	56.3	Non-halophilic	Facultative		pathogen	Mesophilic	15	Salmonid fish		pathogen	normal
NC_007761	Rhizobium etli CFN 42	Bacteria	Alphaproteobacteria	6.53	5963	61	Non-halophilic	Aerobic	plant root associated	plant roots	Mesophilic	-	No	N2 fixation	heterotroph	normal
AM236080	Rhizobium leguminosarum bv. viciae 3841	Bacteria	Alphaproteobacteria	7.79	7143	55	Non-halophilic	Aerobic	plant root associated	plant roots	Mesophilic	25-30	No	N2 fixation	heterotroph	normal
NC_009049	Rhodobacter sphaeroides ATCC 17029	Bacteria	Alphaproteobacteria	4.42	4132	69	Non-halophilic	Facultative	freshwater	freshwater	Mesophilic	25-35	No	photsynthesis and chemosynthesis	photosynthesis	normal
NC_008268	Rhodococcus sp. RHA1	Bacteria	Actinobacteria	9.67	9145	67	Non-halophilic	Aerobic	contaminated soil	contaminated sediment	Mesophilic	30	No	heterotroph-- xenobiotics	heterotroph	normal
NC_007908	Rhodoferax ferrireducens T118	Bacteria	Betaproteobacteria	4.97	4418	59.6	Non-halophilic	Facultative	freshwater sediment	freshwater sediment	Mesophilic	25	No	metal reducer	heterotroph	normal
BX119912	Rhodopirellula baltica SH 1	Bacteria	Planctomycetes	7.1	7325	55.4	Moderate	Aerobic	marine	marine	Mesophilic	28	No	heterotroph	heterotroph	normal
NC_008435	Rhodopseudomonas palustris BisA53	Bacteria	Alphaproteobacteria	5.51	4878	64.4	Non-halophilic	Facultative	soil/freshwater	soil	Mesophilic	25-30	No	everything	photosynthesis	normal
NC_007643	Rhodospirillum rubrum ATCC 11170	Bacteria	Alphaproteobacteria	4.41	3841	65.4	Moderate	Facultative	marine/freshwater	marine	Mesophilic	25-30	No	photosynthesis-- anoxygenic	photosynthesis	normal
NC_009881	Rickettsia akari str. Hartford	Bacteria	Alphaproteobacteria	1.2	1259	32.3	Non-halophilic	Aerobic		pathogen	Mesophilic	-	Human		pathogen	normal
NC_007940	Rickettsia bellii RML369-C	Bacteria	Alphaproteobacteria	1.52	1429	31.6	Non-halophilic		tick endosymbiont	insect endosymbiont	Mesophilic	-	No		heterotroph	normal
NC_009879	Rickettsia canadensis str. McKiel	Bacteria	Alphaproteobacteria	1.2	1093	31.1	Non-halophilic	Aerobic		pathogen	Mesophilic	-	Human		pathogen	normal
NC_003103	Rickettsia conorii str. Malish 7	Bacteria	Alphaproteobacteria	1.3	1374	32.4	Non-halophilic	Aerobic		pathogen	Mesophilic	-	Human		pathogen	normal
NC_007109	Rickettsia felis URRWXCal2	Bacteria	Alphaproteobacteria	1.59	1512	32.5	Non-halophilic			pathogen	Mesophilic	-	Human, Feline		pathogen	normal
NC_009900	Rickettsia massiliae MTU5	Bacteria	Alphaproteobacteria	1.41	980	32.5	Non-halophilic	Aerobic	tick endosymbiont	insect endosymbiont	Mesophilic	-	No		heterotroph	normal
NC_000963	Rickettsia prowazekii str. Madrid E	Bacteria	Alphaproteobacteria	1.11	835	29	Non-halophilic	Aerobic		pathogen	Mesophilic	-	Human		pathogen	normal
NC_010263	Rickettsia rickettsii str. Iowa	Bacteria	Alphaproteobacteria	1.3	1384	32.4	Non-halophilic	Aerobic		pathogen	Mesophilic	-	Human		pathogen	normal
NC_006142	Rickettsia typhi str. Wilmington	Bacteria	Alphaproteobacteria	1.11	838	28.9	Non-halophilic	Aerobic		pathogen	Mesophilic	-	Human, Rodent		pathogen	normal
NC_009767	Roseiflexus castenholzii DSM 13941	Bacteria	Chloroflexi	5.7	4330	60.7	Non-halophilic	Facultative	hot spring	hot spring	Thermophilic	50	No	photosynthesis-- anoxygenic	photosynthesis	normal
CP000686	Roseiflexus sp. RS-1	Bacteria	Chloroflexi	5.8	4517	60.4	Non-halophilic	Facultative	hot spring	hot spring	Thermophilic	-	No	photosynthesis-- anoxygenic	photosynthesis	normal
NC_008209	Roseobacter denitrificans OCh 114	Bacteria	Alphaproteobacteria	4.3	4129	58.9	Moderate	Facultative	marine sediments	marine sediment	Mesophilic	-	No	photosynthesis and heterotrophy	photosynthesis	normal	Swingley et al 2007 Journal of Bacteriology 189:683.
NC_008148	Rubrobacter xylanophilus DSM 9941	Bacteria	Actinobacteria	3.23	3140	70.5	Non-halophilic	Aerobic	freshwater	freshwater	Thermophilic	60	No	heterotroph-- hydrocarbon degrader	heterotroph	normal
CP000282	Saccharophagus degradans 2-40	Bacteria	Gammaproteobacteria	5.06	4007	45.8	Moderate	Aerobic	marine sediments	marine sediment	Mesophilic	1937-04-01	No	heterotroph-- chitin degrader	heterotroph	normal
NC_009142	Saccharopolyspora erythraea NRRL 2338	Bacteria	Actinobacteria	8.2	7197	71.1	Non-halophilic	Aerobic	soil	soil	Mesophilic	25-32 (28)	No	heterotroph	heterotroph	normal
NC_007677	Salinibacter ruber DSM 13855	Bacteria	Bacteroidetes/Chlorobi	3.59	2833	66.1	Extreme halophilic	Aerobic	salt cistern	salt	Mesophilic	37-47	No	heterotroph	heterotroph	normal
NC_009953	Salinispora arenicola CNS-205	Bacteria	Actinobacteria	5.8	4917	69.5	Moderate	Aerobic	marine sediments	marine sediment	Mesophilic	-	No	heterotroph	heterotroph	normal
NC_009380	Salinispora tropica CNB-440	Bacteria	Actinobacteria	5.2	4536	69.5	Moderate	Aerobic	marine sediments	marine sediment	Mesophilic	28	No	heterotroph	heterotroph	normal
NC_004631	Salmonella enterica subsp. enterica serovar Typhi str. Ty2	Bacteria	Gammaproteobacteria	4.8	4318	52.1	Non-halophilic	Facultative		pathogen	Mesophilic	37	Human		pathogen	normal
NC_003197	Salmonella typhimurium LT2	Bacteria	Gammaproteobacteria	4.99	4525	52.2	Non-halophilic	Facultative		pathogen	Mesophilic	37	Human		pathogen	normal
NC_009832	Serratia proteamaculans 568	Bacteria	Gammaproteobacteria	5.45	4942	55	Non-halophilic	Facultative		pathogen	Mesophilic	-	Human		pathogen	normal
NC_008700	Shewanella amazonensis SB2B	Bacteria	Gammaproteobacteria	4.3	3645	53.6	Moderate	Facultative	marine sediments	marine sediment	Mesophilic	37	No	metal reducer	heterotroph	normal
NC_009052	Shewanella baltica OS155	Bacteria	Gammaproteobacteria	5.32	4489	46.2	Moderate	Facultative	marine	marine	Mesophilic	-	No	heterotroph	heterotroph	normal
NC_007954	Shewanella denitrificans OS217	Bacteria	Gammaproteobacteria	4.55	3754	45.1	Moderate	Facultative	marine	marine	Mesophilic	20-25	No	heterotroph (denitrifier)	heterotroph	normal
NC_008345	Shewanella frigidimarina NCIMB 400	Bacteria	Gammaproteobacteria	4.85	4029	41.6	Moderate	Facultative	marine	marine	Mesophilic	20-22	No	metal reducer	heterotroph	normal
NC_010334	Shewanella halifaxensis HAW-EB4	Bacteria	Gammaproteobacteria	5.2	4278	44.6	Moderate	Facultative	marine sediments	marine sediment	Psychrophilic	10	No	heterotroph-- xenobiotics	heterotroph	normal
NC_009092	Shewanella loihica PV-4	Bacteria	Gammaproteobacteria	4.6	3859	53.7	Moderate	Facultative	hydrothermal vent	hydrothermal vent	Mesophilic	-	No	metal reducer	heterotroph	normal
NC_004347	Shewanella oneidensis MR-1	Bacteria	Gammaproteobacteria	5.16	4467	45.9	Non-halophilic	Facultative		pathogen	Mesophilic	-	Human		pathogen	normal
NC_009901	Shewanella pealeana ATCC 700345	Bacteria	Gammaproteobacteria	5.2	4241	44.7	Moderate	Facultative	squid	symbiont	Mesophilic	-	No	S reducer	heterotroph	normal
NC_009438	Shewanella putrefaciens CN-32	Bacteria	Gammaproteobacteria	4.7	3972	44.5	Non-halophilic	Facultative		pathogen	Mesophilic	-	Human		pathogen	normal
NC_009831	Shewanella sediminis HAW-EB3	Bacteria	Gammaproteobacteria	5.5	4497	46.1	Moderate	Facultative	marine sediments	marine sediment	Psychrophilic	10	No	heterotroph-- xenobiotics	heterotroph	normal
NC_008577	Shewanella sp. ANA-3	Bacteria	Gammaproteobacteria	5.28	4360	47.9	Moderate	Facultative	contaminated marine sediments	contaminated sediment	Mesophilic	-	No	Arsenic reducer	heterotroph	normal
NC_008321	Shewanella sp. MR-4	Bacteria	Gammaproteobacteria	4.71	3924	47.9	Moderate	Facultative	Black Sea	marine	Mesophilic	-	No	metal reducer	heterotroph	normal
NC_008322	Shewanella sp. MR-7	Bacteria	Gammaproteobacteria	4.8	4014	47.9	Moderate	Facultative	Black Sea	marine	Mesophilic	-	No	metal reducer	heterotroph	normal
NC_008750	Shewanella sp. W3-18-1	Bacteria	Gammaproteobacteria	4.7	4044	44.6	Non-halophilic	Facultative		pathogen	Mesophilic	-	Human		pathogen	normal
NC_007613	Shigella boydii Sb227	Bacteria	Gammaproteobacteria	4.63	4282	51.1	Non-halophilic	Facultative		pathogen	Mesophilic	37	Human		pathogen	normal
NC_007606	Shigella dysenteriae Sd197	Bacteria	Gammaproteobacteria	4.56	4502	51	Non-halophilic	Facultative		pathogen	Mesophilic	37	Human		pathogen	normal
NC_004741	Shigella flexneri 2a str. 2457T	Bacteria	Gammaproteobacteria	4.6	4061	50.9	Non-halophilic	Facultative		pathogen	Mesophilic	37	Human		pathogen	normal
NC_007384	Shigella sonnei Ss046	Bacteria	Gammaproteobacteria	5.05	4471	50.8	Non-halophilic	Facultative		pathogen	Mesophilic	37	Human		pathogen	normal
NC_003911	Silicibacter pomeroyi DSS-3	Bacteria	Alphaproteobacteria	4.6	4252	64.1	Moderate	Aerobic	marine	marine	Mesophilic	-	No	heterotroph (DMSP)	heterotroph	normal
NC_008044	Silicibacter sp. TM1040	Bacteria	Alphaproteobacteria	4.15	3864	60.1	Non-halophilic	Aerobic	dinoflagelate associated	marine	Mesophilic	-	No	heterotroph (DMSP)	heterotroph	normal
NC_009636	Sinorhizobium medicae WSM419	Bacteria	Alphaproteobacteria	6.82	6213	61.1	Non-halophilic	Aerobic	plant root associated	plant roots	Mesophilic	28	No	N2 fixation	heterotroph	normal
NC_003047	Sinorhizobium meliloti 1021	Bacteria	Alphaproteobacteria	6.69	6218	62.2	Non-halophilic	Aerobic	plant root associated	plant roots	Mesophilic	25-30	No	N2 fixation	heterotroph	normal
NC_007712	Sodalis glossinidius str. 'morsitans'	Bacteria	Gammaproteobacteria	4.29	2516	54.5	Non-halophilic	Microaerophilic	fly endosymbiont	insect endosymbiont	Mesophilic	25	No		heterotroph	normal
NC_008536	Solibacter usitatus Ellin6076	Bacteria	Acidobacteria	10	7826	61.9	Non-halophilic	Aerobic	soil	soil	Mesophilic	30	No	heterotroph	heterotroph	normal
NC_010162	Sorangium cellulosum 'So ce 56'	Bacteria	Deltaproteobacteria	13.03	9381	71.4	Non-halophilic	Aerobic	soil	soil	Mesophilic	-	No		heterotroph	normal
NC_009511	Sphingomonas wittichii RW1	Bacteria	Alphaproteobacteria	5.93	5345	67.9	Non-halophilic	Aerobic	freshwater	freshwater	Mesophilic	-	No	heterotroph-- xenobiotics	heterotroph	normal
NC_008048	Sphingopyxis alaskensis RB2256	Bacteria	Alphaproteobacteria	3.37	3195	65.5	Moderate	Aerobic	marine	marine	Mesophilic	-	No	heterotroph	heterotroph	normal
NC_007622	Staphylococcus aureus RF122	Bacteria	Firmicutes	2.7	2509	32.8	Non-halophilic	Facultative		pathogen	Mesophilic	30-37	Human, Animal		pathogen	normal
NC_002976	Staphylococcus epidermidis RP62A	Bacteria	Firmicutes	2.64	2526	32.1	Non-halophilic	Facultative		pathogen	Mesophilic	30-37	Human		pathogen	normal
NC_007168	Staphylococcus haemolyticus JCSC1435	Bacteria	Firmicutes	2.7	2676	32.8	Non-halophilic	Facultative		pathogen	Mesophilic	30-37	Human		pathogen	normal
NC_007350	Staphylococcus saprophyticus subsp. saprophyticus ATCC 15305	Bacteria	Firmicutes	2.56	2514	33.2	Non-halophilic	Aerobic		pathogen	Mesophilic	-	Human		pathogen	normal
NC_004116	Streptococcus agalactiae 2603V/R	Bacteria	Firmicutes	2.2	2124	35.6	Non-halophilic	Facultative		pathogen	Mesophilic	37	Human		pathogen	normal
NC_009785	Streptococcus gordonii str. Challis substr. CH1	Bacteria	Firmicutes	2.2	2051	40.5	Non-halophilic	Facultative		pathogen	Mesophilic	37	Human		pathogen	normal
NC_004350	Streptococcus mutans UA159	Bacteria	Firmicutes	2.03	1960	36.8	Non-halophilic	Facultative		pathogen	Mesophilic	37	Human		pathogen	normal
NC_008533	Streptococcus pneumoniae D39	Bacteria	Firmicutes	2	1914	39.7	Non-halophilic	Facultative		pathogen	Mesophilic	30-35	Human		pathogen	normal
NC_002737	Streptococcus pyogenes M1 GAS	Bacteria	Firmicutes	1.9	1697	38.5	Non-halophilic	Facultative		pathogen	Mesophilic	30-35	Human		pathogen	normal
NC_009009	Streptococcus sanguinis SK36	Bacteria	Firmicutes	2.4	2270	43.4	Non-halophilic	Facultative		pathogen	Mesophilic	-	Human		pathogen	normal
CP000407	Streptococcus suis 05ZYH33	Bacteria	Firmicutes	2.1	2186	41.1	Non-halophilic	Facultative		pathogen	Mesophilic	37	Swine, Human		pathogen	normal
CP000408	Streptococcus suis 98HAH33	Bacteria	Firmicutes	2.1	2185	41.1	Non-halophilic	Facultative		pathogen	Mesophilic	37	Swine, Human		pathogen	normal
NC_006449	Streptococcus thermophilus CNRZ1066	Bacteria	Firmicutes	1.8	1915	39.1	Non-halophilic	Anaerobic	yogurt	food	Thermophilic	45	No	fermentation	pathogen	normal
NC_003155	Streptomyces avermitilis MA-4680	Bacteria	Actinobacteria	9.09	7676	70.7	Non-halophilic	Aerobic	soil	soil	Mesophilic	25-35 (26)	No	heterotroph	pathogen	normal
NC_003888	Streptomyces coelicolor A3(2)	Bacteria	Actinobacteria	9.09	8154	72	Non-halophilic	Aerobic	soil	soil	Mesophilic	25-35	No	heterotroph	pathogen	normal
NC_010730	Sulfurihydrogenibium sp. YO3AOP1	Bacteria	Aquificae	1.8	1721	32	Non-halophilic	Microaerophilic	hot spring	hot spring	Thermophilic	-	No	chemoautotroph (H2 and S)	chemoautotroph	normal
NC_007575	Sulfurimonas denitrificans DSM 1251	Bacteria	Epsilonproteobacteria	2.2	2096	34.5	Moderate	Anaerobic	marine sediments	marine sediment	Mesophilic	20-25	No	H2S denitrifier	chemoautotroph	normal
NC_009663	Sulfurovum sp. NBC37-1	Bacteria	Epsilonproteobacteria	2.6	2438	43.9	Moderate	Facultative	hydrothermal vent	hydrothermal vent	Mesophilic	-	No	eats H2S (NO3, O2)	chemoautotroph	normal	Nakagawaet al 2007 PNAS 104: 12146.
NC_006177	Symbiobacterium thermophilum IAM 14863	Bacteria	Actinobacteria	3.6	3338	68.7	Non-halophilic	Microaerophilic	compost	compost	Thermophilic	60	No	heterotroph	heterotroph	normal
NC_006576	Synechococcus elongatus PCC 6301	Bacteria	Cyanobacteria	2.7	2527	55.5	Non-halophilic	Aerobic	freshwater	freshwater	Mesophilic	-	No	photosynthesis	photosynthesis	normal
NC_008319	Synechococcus sp. CC9311	Bacteria	Cyanobacteria	2.61	2892	52.4	Moderate	Aerobic	marine	marine	Mesophilic	-	No	photosynthesis	photosynthesis	normal
NC_007516	Synechococcus sp. CC9605	Bacteria	Cyanobacteria	2.51	2645	59.2	Moderate	Aerobic	marine	marine	Mesophilic	-	No	photosynthesis	photosynthesis	normal
NC_007513	Synechococcus sp. CC9902	Bacteria	Cyanobacteria	2.23	2307	54.2	Moderate	Aerobic	marine	marine	Mesophilic	-	No	photosynthesis	photosynthesis	normal
NC_007776	Synechococcus sp. JA-2-3B'a(2-13)	Bacteria	Cyanobacteria	3.05	2862	58.5	Non-halophilic	Facultative	hot spring	hot spring	Thermophilic	-	No	photosynthesis	photosynthesis	normal
CP000239	Synechococcus sp. JA-3-3Ab	Bacteria	Cyanobacteria	2.93	2760	60.2	Non-halophilic	Facultative	hot spring	hot spring	Thermophilic	-	No	photosynthesis	photosynthesis	normal
NC_009482	Synechococcus sp. RCC307	Bacteria	Cyanobacteria	2.2	2535	60.8	Moderate	Aerobic	marine	marine	Mesophilic	-	No	photosynthesis	photosynthesis	normal
NC_009481	Synechococcus sp. WH 7803	Bacteria	Cyanobacteria	2.4	2533	60.2	Moderate	Aerobic	marine	marine	Mesophilic	-	No	photosynthesis	photosynthesis	normal
BX548020	Synechococcus sp. WH 8102	Bacteria	Cyanobacteria	2.43	2519	59.4	Moderate	Aerobic	marine	marine	Mesophilic	-	No	photosynthesis	photosynthesis	normal
NC_000911	Synechocystis sp. PCC 6803	Bacteria	Cyanobacteria	3.95	3569	47.4	Non-halophilic	Aerobic	freshwater	freshwater	Mesophilic	-	No	photosynthesis	photosynthesis	normal
NC_008554	Syntrophobacter fumaroxidans MPOB	Bacteria	Deltaproteobacteria	5	4064	59.9	Non-halophilic	Anaerobic	activated sludge	activated sludge	Mesophilic	37	No	heterotroph	heterotroph	normal
NC_008346	Syntrophomonas wolfei subsp. wolfei str. Goettingen	Bacteria	Firmicutes	2.94	2504	44.9	Non-halophilic	Anaerobic	soil/sewage	soil	Mesophilic	-	No	heterotroph	heterotroph	normal
NC_007759	Syntrophus aciditrophicus SB	Bacteria	Deltaproteobacteria	3.2	3168	51.5	Non-halophilic	Anaerobic	activated sludge	activated sludge	Mesophilic	35	No	heterotroph-- xenobiotics	heterotroph	normal
NC_010321	Thermoanaerobacter pseudethanolicus ATCC 33223	Bacteria	Firmicutes	2.4	2243	34.5	Non-halophilic	Anaerobic	hot spring	hot spring	Thermophilic	-	No	makes H2S and ethanol	heterotroph	normal
NC_010320	Thermoanaerobacter sp. X514	Bacteria	Firmicutes	2.5	2349	34.5	Non-halophilic	Anaerobic	soil	soil	Thermophilic	60	No	makes H2S and ethanol	heterotroph	normal
NC_003869	Thermoanaerobacter tengcongensis MB4	Bacteria	Firmicutes	2.69	2588	37.6	Non-halophilic	Anaerobic	hot spring	hot spring	Hyperthermophilic	75	No	fermentation	heterotroph	normal
NC_007333	Thermobifida fusca YX	Bacteria	Actinobacteria	3.6	3110	67.5	Non-halophilic	Aerobic	compost	compost	Thermophilic	50-55	Human	heterotroph	heterotroph	normal
NC_011296	Thermodesulfovibrio yellowstonii DSM 11347	Bacteria	Nitrospirae	2	2033	34.1	Non-halophilic	Anaerobic	hot spring	hot spring	Thermophilic	65	No	sulfate reducer	heterotroph	normal
NC_011653	Thermosipho africanus TCF52B	Bacteria	Thermotogae	2	1911	30.8	Non-halophilic	Anaerobic	oil reservoir	oil well	Thermophilic	75	No	fermentation	heterotroph	normal
NC_009616	Thermosipho melanesiensis BI429	Bacteria	Thermotogae	1.9	1879	31.4	Moderate	Anaerobic	hydrthermal vent clam	symbiont	Thermophilic	70	No	heterotroph	heterotroph	normal	Antoine et al 1997 International Journal of systematic bacteriology 47: 1118.
NC_004113	Thermosynechococcus elongatus BP-1	Bacteria	Cyanobacteria	2.59	2476	53.9	Non-halophilic	Aerobic	hot spring	hot spring	Thermophilic	55	No	photosynthesis	photosynthesis	normal
NC_009828	Thermotoga lettingae TMO	Bacteria	Thermotogae	2.1	2040	38.7	Non-halophilic	Anaerobic	bioreactor	activated sludge	Hyperthermophilic	65	No	makes H2S	heterotroph	normal
NC_023151	Thermotoga maritima MSB8	Bacteria	Thermotogae	1.86	1858	46.2	Moderate	Anaerobic	hydrothermal vent	hydrothermal vent	Hyperthermophilic	80	No	heterotroph	heterotroph	normal
NC_009486	Thermotoga petrophila RKU-1	Bacteria	Thermotogae	1.8	1785	46.1	Moderate	Anaerobic	oil reservoir marine	oil well	Hyperthermophilic	80	No	heterotroph-- hydrocarbon degrader	heterotroph	normal
NC_010483	Thermotoga sp. RQ2	Bacteria	Thermotogae	1.9	1819	46.2	Moderate	Anaerobic	hydrothermal vent	hydrothermal vent	Hyperthermophilic	76-82	No	heterotroph	heterotroph	normal
NC_005835	Thermus thermophilus HB27	Bacteria	Deinococcus-Thermus	2.13	2210	69.4	Non-halophilic	Aerobic	hot spring	hot spring	Thermophilic	68	No	heterotroph	heterotroph	normal
NC_007404	Thiobacillus denitrificans ATCC 25259	Bacteria	Betaproteobacteria	2.91	2827	66.1	Non-halophilic	Facultative	soil	soil	Mesophilic	28-32	No	chemoautotroph (H2S denitrification)	chemoautotroph	normal
NC_007520	Thiomicrospira crunogena XCL-2	Bacteria	Gammaproteobacteria	2.4	2196	43.1	Moderate	Anaerobic	hydrothermal vent	hydrothermal vent	Mesophilic	28-32	No	eats H2S	chemoautotroph	normal
NC_002967	Treponema denticola ATCC 35405	Bacteria	Spirochaetes	2.8	2767	37.9	Non-halophilic	Anaerobic		pathogen	Mesophilic	30-42	Human		pathogen	normal
NC_000919	Treponema pallidum subsp. pallidum str. Nichols	Bacteria	Spirochaetes	1.14	1036	52.8	Non-halophilic	Anaerobic		pathogen	Mesophilic	-	Human		pathogen	normal
NC_008312	Trichodesmium erythraeum IMS101	Bacteria	Cyanobacteria	7.8	4451	34.1	Moderate	Aerobic	marine	marine	Mesophilic	-	No	photosynthesis-- N2 fixation	photosynthesis	normal
NC_004551	Tropheryma whipplei TW08/27	Bacteria	Actinobacteria	0.93	783	46.3	Non-halophilic	Aerobic		pathogen	Mesophilic	37	Human		pathogen	normal
NC_002162	Ureaplasma parvum serovar 3 str. ATCC 700970	Bacteria	Firmicutes	0.75	614	25.5	Non-halophilic	Facultative		pathogen	Mesophilic	-	Animal		pathogen	normal
NC_008786	Verminephrobacter eiseniae EF01-2	Bacteria	Betaproteobacteria	5.63	4947	65.2	Non-halophilic		earthworm	symbiont	Mesophilic	-	No			normal
NC_009457	Vibrio cholerae O395	Bacteria	Gammaproteobacteria	4.1	3875	47.5	Non-halophilic	Facultative		pathogen	Mesophilic	20-30	Human, Primate		pathogen	normal
NC_006840	Vibrio fischeri ES114	Bacteria	Gammaproteobacteria	4.28	3818	38.4	Non-halophilic	Facultative	squid	symbiont	Mesophilic	-	No	heterotroph	heterotroph	normal
NC_009783	Vibrio harveyi ATCC BAA-1116	Bacteria	Gammaproteobacteria	6.09	6040	45.4	Moderate	Facultative		pathogen	Mesophilic	20-30	Vertebrate and invertebrate aquatic organisms		pathogen	normal
NC_004603	Vibrio parahaemolyticus RIMD 2210633	Bacteria	Gammaproteobacteria	5.17	4832	45.4	Non-halophilic	Facultative		pathogen	Mesophilic	20-30	Human		pathogen	normal
NC_004459	Vibrio vulnificus CMCP6	Bacteria	Gammaproteobacteria	5.1	4472	46.7	Non-halophilic	Facultative		pathogen	Mesophilic	20-30	Human		pathogen	normal
NC_004344	Wigglesworthia glossinidia endosymbiont of Glossina brevipalpis	Bacteria	Gammaproteobacteria	0.7	617	22.5	Non-halophilic		fly endosymbiont	insect endosymbiont	Mesophilic	-	No		heterotroph	normal
NC_002978	Wolbachia endosymbiont of Drosophila melanogaster	Bacteria	Alphaproteobacteria	1.27	1195	35.2	Non-halophilic		fly endosymbiont	insect endosymbiont	Mesophilic	-	No		heterotroph	normal
NC_005090	Wolinella succinogenes DSM 1740	Bacteria	Epsilonproteobacteria	2.1	2042	48.5	Non-halophilic	Microaerophilic	cow intestines	Gut	Mesophilic	-	No	heterotroph	heterotroph	normal
NC_009720	Xanthobacter autotrophicus Py2	Bacteria	Alphaproteobacteria	5.62	5035	67.3	Non-halophilic	Facultative	soil/freshwater	soil	Mesophilic	-	No	heterotroph (N2 fixer) and chemoautotroph	chemoautotroph	normal
NC_003919	Xanthomonas axonopodis pv. citri str. 306	Bacteria	Gammaproteobacteria	5.27	4427	64.7	Non-halophilic	Aerobic		pathogen	Mesophilic	25-30	Plant		pathogen	normal
NC_007086	Xanthomonas campestris pv. campestris str. 8004	Bacteria	Gammaproteobacteria	5.15	4273	65	Non-halophilic	Aerobic		pathogen	Mesophilic	25-30	Plant		pathogen	normal
NC_006834	Xanthomonas oryzae pv. oryzae KACC10331	Bacteria	Gammaproteobacteria	4.9	4062	63.7	Non-halophilic	Aerobic		pathogen	Mesophilic	-	Rice		pathogen	normal
NC_002488	Xylella fastidiosa 9a5c	Bacteria	Gammaproteobacteria	2.73	2832	52.6	Non-halophilic	Aerobic		pathogen	Mesophilic	26-28	Plant		pathogen	normal
NC_008800	Yersinia enterocolitica subsp. enterocolitica 8081	Bacteria	Gammaproteobacteria	4.67	4051	47.2	Non-halophilic	Facultative		pathogen	Mesophilic	28-30	Human, Animal		pathogen	normal
NC_010159	Yersinia pestis Angola	Bacteria	Gammaproteobacteria	4.68	4040	47.6	Non-halophilic	Facultative		pathogen	Mesophilic	-	Human, Rodent		pathogen	normal
CP009712	Yersinia pseudotuberculosis IP 32953	Bacteria	Gammaproteobacteria	4.8	4038	47.6	Non-halophilic	Facultative		pathogen	Mesophilic	28-30	Human, Animal		pathogen	normal
NC_006526	Zymomonas mobilis subsp. mobilis ZM4	Bacteria	Alphaproteobacteria	2.06	1998	46.3	Non-halophilic	Anaerobic	plant sap	food	Mesophilic	25-30	No	fermentation	heterotroph	normal

## Sheet: Supplemental_Table2
Supplemental Table 2: Unmodified reciprocal best BLAST hits
Bacterial name	Aeropyrum pernix K1	Archaeoglobus fulgidus DSM 4304	Caldivirga maquilingensis IC-167	Candidatus Korarchaeum cryptofilum OPF8	Candidatus Methanoregula boonei 6A8	Desulfurococcus kamchatkensis 1221n	Haloarcula marismortui ATCC 43049	Halobacterium salinarum R1	Halobacterium sp. NRC-1	Haloquadratum walsbyi DSM 16790	Hyperthermus butylicus DSM 5456	Ignicoccus hospitalis KIN4/I	Metallosphaera sedula DSM 5348	Methanobrevibacter smithii ATCC 35061	Methanocaldococcus jannaschii DSM 2661	Methanococcoides burtonii DSM 6242	Methanococcus aeolicus Nankai-3	Methanococcus maripaludis S2	Methanococcus vannielii SB	Methanocorpusculum labreanum Z	Methanoculleus marisnigri JR1	Methanopyrus kandleri AV19	Methanosaeta thermophila PT	Methanosarcina acetivorans C2A	Methanosarcina barkeri str. Fusaro	Methanosarcina mazei Go1	Methanosphaera stadtmanae DSM 3091	Methanospirillum hungatei JF-1	Methanothermobacter thermautotrophicus str. Delta H	Natronomonas pharaonis DSM 2160	Nitrosopumilus maritimus SCM1	Picrophilus torridus DSM 9790	Pyrobaculum aerophilum str. IM2	Pyrobaculum arsenaticum DSM 13514	Pyrobaculum calidifontis JCM 11548	Pyrobaculum islandicum DSM 4184	Pyrococcus abyssi GE5	Pyrococcus furiosus DSM 3638	Pyrococcus horikoshii OT3	Staphylothermus marinus F1	Sulfolobus acidocaldarius DSM 639	Sulfolobus solfataricus P2	Sulfolobus tokodaii str. 7	Thermococcus kodakarensis KOD1	Thermococcus onnurineus NA1	Thermofilum pendens Hrk 5	Thermoplasma acidophilum DSM 1728	Thermoplasma volcanium GSS1	Thermoproteus neutrophilus V24Sta
Acaryochloris marina MBIC11017	275	361	316	284	403	227	540	405	403	455	238	257	349	348	320	414	322	356	353	338	430	266	366	538	522	507	322	448	363	474	353	345	324	321	323	313	340	361	298	237	351	381	360	345	323	252	316	320	293
Acidiphilium cryptum JF-5	261	343	317	254	347	215	467	360	362	383	216	231	354	282	247	348	258	285	280	297	337	217	307	419	417	393	255	368	291	408	289	335	315	303	303	295	301	315	262	199	365	399	360	308	287	248	315	313	289
Acidithiobacillus ferrooxidans ATCC 23270	232	301	266	240	357	188	359	304	302	317	205	225	329	291	275	350	284	318	307	307	350	234	309	423	420	412	276	358	314	342	270	311	272	259	261	252	288	292	251	196	318	334	325	291	263	217	281	294	255
Acidobacteria bacterium Ellin345	298	393	375	323	425	244	475	402	398	393	247	269	378	338	303	389	301	333	336	350	411	271	355	492	493	475	309	412	336	425	356	379	359	361	352	338	357	385	339	259	385	390	375	378	349	268	349	353	319
Acidothermus cellulolyticus 11B	268	330	319	266	324	197	406	323	322	343	221	238	350	287	236	313	244	261	267	264	321	223	296	381	379	366	268	333	276	365	316	322	312	309	310	289	297	314	270	208	346	380	355	294	264	251	303	300	275
Acidovorax avenae subsp. citrulli AAC00-1	272	349	284	266	361	197	486	385	383	410	223	223	326	286	264	342	244	291	296	320	377	219	306	434	422	400	274	384	283	431	304	335	309	300	307	275	306	318	276	212	345	359	327	307	290	234	304	304	270
Acidovorax sp. JS42	273	354	293	272	351	201	490	368	367	399	217	226	316	294	266	359	263	305	310	319	353	226	321	438	417	429	273	379	298	442	307	310	321	307	314	297	297	317	266	205	346	353	334	309	289	242	293	288	284
Acinetobacter baumannii ATCC 17978	190	284	251	219	314	140	389	296	294	303	165	185	282	258	217	282	220	265	260	272	294	179	249	358	356	335	230	313	245	362	255	270	238	231	223	224	244	266	215	145	270	299	280	261	231	172	261	259	212
Acinetobacter sp. ADP1	230	314	277	236	336	168	425	343	339	367	193	213	305	287	242	320	241	294	283	300	324	216	282	404	390	389	274	350	290	405	283	303	269	269	262	258	280	292	241	175	315	332	310	284	261	185	273	283	251
Actinobacillus pleuropneumoniae L20	205	264	221	211	278	175	339	286	283	299	185	202	250	257	233	287	234	276	283	282	305	204	235	355	342	328	241	295	253	311	252	243	244	245	246	234	251	264	225	184	238	252	235	283	251	202	219	218	219
Actinobacillus succinogenes 130Z	208	267	250	215	291	185	341	282	279	294	182	193	259	265	242	299	243	279	288	292	304	190	243	365	346	329	250	319	256	302	246	249	248	249	256	245	257	277	228	181	255	265	244	279	244	209	221	228	233
Aeromonas hydrophila subsp. hydrophila ATCC 7966	274	367	306	284	376	243	495	419	410	409	249	237	333	317	297	366	298	349	332	348	386	237	334	489	458	452	298	428	324	431	315	319	323	333	320	318	343	357	301	243	330	354	326	355	335	268	296	299	300
Aeromonas salmonicida subsp. salmonicida A449	256	345	293	269	365	224	473	405	400	396	236	237	318	300	278	353	286	332	315	341	375	225	314	462	445	429	283	406	297	406	304	313	308	315	300	298	327	341	296	220	325	337	315	345	326	258	278	286	281
Agrobacterium tumefaciens str. C58	299	375	334	258	380	219	553	410	404	454	236	221	361	314	274	389	267	312	317	336	398	239	325	499	469	460	284	405	310	458	320	348	333	328	323	300	328	347	304	230	373	402	372	335	310	263	323	315	296
Akkermansia muciniphila ATCC BAA-835	185	267	236	210	306	162	306	270	268	271	169	191	234	272	229	299	239	250	262	284	306	196	269	358	359	345	269	324	268	292	249	242	228	226	219	219	245	269	221	165	230	252	225	257	233	184	229	226	213
Alcanivorax borkumensis SK2	236	328	266	219	324	175	432	348	349	376	202	217	296	290	252	352	267	298	298	301	335	227	284	406	393	376	257	341	280	412	289	285	273	269	270	261	277	298	244	178	304	308	301	290	273	192	266	263	251
Alkalilimnicola ehrlichei MLHE-1	288	377	299	274	376	210	486	376	374	422	237	261	335	316	295	395	298	340	325	338	394	263	328	471	442	445	287	415	328	444	312	306	318	320	324	305	330	333	284	223	329	344	329	337	310	235	287	285	305
Alkaliphilus metalliredigens QYMF	279	427	296	323	426	251	501	408	404	423	247	244	332	377	326	443	339	414	414	385	448	288	360	570	549	545	330	463	393	435	316	335	340	321	321	307	392	411	357	258	319	353	334	408	382	257	307	303	295
Alkaliphilus oremlandii OhILAs	233	332	226	268	327	217	381	319	313	311	211	203	256	305	265	344	266	314	316	317	355	216	276	430	400	402	265	371	308	328	239	246	245	251	248	245	326	322	296	225	255	271	259	340	330	231	254	253	243
Alteromonas macleodii 'Deep ecotype'	246	316	287	224	332	191	467	372	365	371	216	220	306	287	251	351	254	309	302	297	335	220	279	413	408	384	259	362	283	405	279	291	272	270	265	256	293	316	268	196	317	330	305	308	282	201	261	269	251
Anabaena variabilis ATCC 29413	297	396	327	290	432	233	542	433	430	481	250	261	363	359	331	430	340	354	363	359	426	275	387	558	539	525	346	466	383	474	361	350	346	330	342	325	343	375	306	241	358	383	361	361	329	284	312	315	314
Anaeromyxobacter dehalogenans 2CP-C	316	437	349	324	430	257	500	418	410	420	275	288	383	348	325	409	320	364	364	348	447	275	369	532	514	499	329	461	377	454	358	373	355	369	361	348	389	413	351	265	383	398	389	393	371	275	345	353	326
Anaeromyxobacter sp. Fw109-5	323	441	342	317	441	261	513	417	411	439	280	284	389	353	334	433	334	381	375	368	472	286	385	546	520	520	335	474	371	456	361	361	374	370	356	347	384	399	341	260	374	399	388	400	368	278	347	362	328
Anaplasma marginale str. St. Maries	122	156	137	113	164	109	198	178	178	180	104	119	144	150	135	164	134	143	148	164	168	120	158	184	186	179	140	166	155	195	161	151	141	135	136	129	137	144	138	104	147	144	151	146	125	108	144	145	127
Anaplasma phagocytophilum HZ	112	143	129	106	153	104	185	163	163	160	99	108	139	137	121	162	122	135	143	150	154	110	141	178	175	172	128	150	141	180	151	142	128	117	126	120	126	135	120	97	136	139	143	128	114	99	136	138	114
Anoxybacillus flavithermus WK1	282	382	314	273	354	232	495	445	441	427	248	249	351	329	299	374	289	339	332	328	384	269	320	467	446	432	313	394	320	454	332	341	333	326	340	313	358	386	316	236	360	380	356	370	330	256	324	325	295
Aquifex aeolicus VF5	274	363	299	280	333	225	351	295	295	304	265	286	322	312	322	339	308	321	323	302	355	290	330	397	401	381	279	338	341	338	303	291	320	319	315	306	326	359	294	240	318	332	332	346	313	254	281	284	300
Arcobacter butzleri RM4018	199	288	235	205	313	155	329	276	277	294	177	216	255	273	260	316	271	301	302	275	324	209	263	375	371	365	251	337	271	305	270	252	234	225	235	237	249	260	221	152	248	272	258	274	241	164	245	241	229
Aromatoleum aromaticum EbN1	272	393	301	286	392	205	494	374	375	406	235	238	359	318	290	389	289	332	324	336	392	250	356	505	466	488	294	423	329	449	308	329	317	320	308	303	315	324	275	208	345	371	345	329	298	247	304	325	288
Arthrobacter aurescens TC1	267	326	328	256	351	212	514	385	382	410	226	225	351	292	243	331	258	287	286	279	349	217	284	438	424	393	260	355	288	425	304	324	312	306	308	283	313	324	283	215	360	394	357	307	282	258	313	311	262
Arthrobacter sp. FB24	270	336	326	255	349	212	524	386	386	425	223	226	345	290	245	342	251	283	289	283	360	217	288	446	418	406	267	367	297	421	305	330	314	311	311	282	311	333	278	216	365	388	362	307	288	256	325	311	267
Aster yellows witches'-broom phytoplasma AYWB	69	74	58	69	79	64	89	85	84	87	65	55	62	75	60	76	62	64	66	75	75	57	73	91	92	93	76	80	72	86	64	70	70	66	69	65	72	73	68	61	64	68	61	71	72	70	72	69	61
Azoarcus sp. BH72	276	401	293	285	399	208	513	382	384	421	254	249	353	318	294	392	297	353	339	335	405	250	354	490	463	470	309	418	330	463	333	326	325	333	328	308	324	341	297	213	354	380	347	343	312	256	295	298	297
Azorhizobium caulinodans ORS 571	304	383	313	270	384	220	535	407	399	450	219	225	369	310	264	364	284	318	315	332	380	235	311	478	459	444	293	407	319	472	314	359	334	332	326	306	329	346	291	213	367	410	369	336	307	247	328	321	305
Bacillus amyloliquefaciens FZB42	295	373	349	278	394	236	515	429	426	418	255	258	371	345	297	388	296	349	337	340	417	260	311	476	463	443	300	398	323	456	335	362	329	332	324	309	369	367	323	252	372	380	373	371	343	265	338	321	283
Bacillus anthracis str. Ames	312	410	334	310	408	246	564	471	466	460	260	277	381	367	314	387	305	367	359	385	429	272	344	531	532	490	321	434	350	494	343	375	343	343	332	322	381	402	340	256	384	405	381	382	361	289	353	349	304
Bacillus cereus ATCC 14579	305	412	338	305	411	247	565	475	471	465	252	268	380	363	307	395	309	376	365	394	433	267	347	534	526	491	319	436	343	491	338	373	347	346	334	322	381	390	342	255	387	415	388	384	365	288	359	346	301
Bacillus clausii KSM-K16	303	376	367	284	378	242	534	424	422	433	258	256	365	350	282	372	291	338	337	355	407	254	326	490	476	459	310	409	322	467	333	366	342	343	334	320	363	372	328	255	383	417	376	373	341	267	331	327	295
Bacillus halodurans C-125	314	409	351	301	387	251	565	478	471	461	260	269	381	345	294	399	309	361	354	375	414	268	328	512	490	464	324	417	339	505	350	367	345	348	343	324	378	387	342	254	394	434	390	383	359	274	346	343	296
Bacillus licheniformis ATCC 14580	303	394	360	292	395	250	545	440	439	438	259	265	384	353	305	403	298	364	355	355	421	275	335	506	480	458	314	414	331	477	338	377	354	355	342	326	378	403	342	266	377	417	379	394	353	273	348	341	296
Bacillus pumilus SAFR-032	285	366	334	280	376	226	511	426	421	424	251	255	357	328	288	381	291	345	337	331	402	255	313	477	456	426	286	397	305	443	326	351	326	320	313	298	359	369	327	241	359	386	351	360	340	249	312	309	280
Bacillus subtilis subsp. subtilis str. 168	290	381	347	287	384	239	523	431	427	443	254	261	366	339	294	394	300	363	348	351	417	260	326	476	472	456	308	395	325	472	338	366	337	337	323	312	370	384	340	253	364	392	365	374	344	267	348	327	286
Bacillus thuringiensis str. Al Hakam	310	424	345	320	416	252	570	477	471	470	263	281	388	375	311	388	315	377	371	393	437	275	347	532	531	497	326	435	354	503	347	377	349	351	342	328	391	402	344	259	391	412	379	391	362	291	362	355	309
Bacillus weihenstephanensis KBAB4	309	420	337	304	412	249	575	479	472	464	257	276	384	368	307	398	312	375	370	383	445	268	349	542	533	505	321	436	355	498	344	381	358	354	341	335	386	403	350	251	391	418	384	403	373	293	360	345	304
Bacteroides fragilis NCTC 9343	215	305	272	234	347	192	367	318	315	308	180	207	266	326	268	360	261	316	312	326	377	212	303	458	447	423	312	377	303	319	270	281	259	248	241	242	285	316	250	197	271	290	275	295	281	205	266	274	235
Bacteroides thetaiotaomicron VPI-5482	222	315	277	240	338	201	379	328	322	316	189	208	253	328	273	371	265	316	316	329	383	211	313	473	452	441	307	400	298	333	274	273	258	250	245	248	290	317	261	201	263	291	268	308	279	211	262	270	241
Bacteroides vulgatus ATCC 8482	208	308	268	228	335	190	358	327	325	309	177	205	262	322	272	366	262	318	310	315	365	215	310	448	437	415	297	376	294	326	268	274	246	237	232	244	288	311	249	191	266	285	269	300	281	196	262	265	236
Bartonella bacilliformis KC583	153	187	161	144	199	128	231	207	203	209	127	137	171	167	153	208	152	168	172	194	204	136	186	238	238	231	158	204	172	216	189	181	171	165	166	162	168	182	160	129	173	174	178	178	156	133	177	175	152
Bartonella henselae str. Houston-1	160	199	173	154	207	124	246	221	217	234	136	139	178	180	155	221	159	175	182	198	222	137	196	257	251	249	172	217	183	242	195	195	180	179	174	172	178	190	161	128	181	188	189	183	162	136	187	186	163
Bartonella quintana str. Toulouse	153	188	167	146	200	125	234	213	211	215	130	137	167	171	150	210	151	159	170	186	211	129	184	244	242	238	165	210	172	230	187	183	175	165	168	159	172	181	157	127	167	174	177	176	157	133	176	174	153
Bartonella tribocorum CIP 105476	158	201	171	161	217	130	249	226	223	235	138	147	184	183	161	225	163	179	188	204	223	142	199	263	256	250	181	230	181	248	199	194	188	174	185	173	184	195	167	127	187	194	191	192	165	138	192	194	168
Baumannia cicadellinicola str. Hc (Homalodisca coagulata)	107	145	134	113	166	98	174	164	162	158	108	116	135	141	125	150	130	134	139	150	161	120	146	167	169	162	136	175	134	164	155	143	139	127	131	128	128	139	115	97	131	133	133	140	129	96	130	131	131
Bdellovibrio bacteriovorus HD100	230	274	230	219	291	190	367	326	323	313	202	181	256	242	213	293	216	237	236	248	313	189	249	344	344	343	231	312	246	343	260	265	264	257	253	237	257	265	236	187	260	266	262	270	261	201	243	253	216
Bifidobacterium adolescentis ATCC 15703	165	210	211	170	242	152	277	212	210	250	144	165	206	234	183	222	187	210	217	232	221	162	194	268	270	260	214	249	200	240	188	204	191	199	193	191	205	225	194	149	206	225	219	210	184	170	180	179	176
Bifidobacterium longum NCC2705	177	224	217	182	242	151	290	223	219	263	156	177	224	236	187	232	181	210	217	233	236	171	198	281	278	270	217	266	209	251	203	216	202	205	209	205	212	221	198	158	224	252	234	217	201	187	193	193	185
Bordetella bronchiseptica RB50	286	384	289	271	370	211	537	401	395	408	234	230	355	300	260	358	252	295	311	310	367	229	296	449	447	425	278	378	286	470	322	336	319	318	311	301	317	330	286	210	364	384	346	317	301	245	311	306	279
Bordetella parapertussis 12822	278	367	282	263	366	204	517	387	380	404	226	227	344	300	254	344	246	294	302	304	351	221	293	433	429	410	272	364	283	457	311	320	306	312	301	298	315	318	275	204	354	372	338	312	289	240	297	291	276
Bordetella pertussis Tohama I	266	347	271	249	338	196	468	372	366	389	212	217	322	290	249	339	241	278	291	293	345	214	283	399	407	384	261	344	271	432	295	311	292	295	290	280	289	304	261	196	338	360	320	291	272	230	284	280	260
Bordetella petrii DSM 12804	272	354	301	268	357	194	495	372	371	400	224	226	346	300	246	361	254	301	305	302	375	227	301	446	430	412	269	375	286	453	309	334	317	311	319	289	302	317	269	200	354	380	355	310	289	248	314	304	271
Borrelia afzelii PKo	106	134	93	101	126	97	144	137	136	130	91	89	97	116	97	127	102	117	123	119	129	90	119	145	144	151	106	131	113	131	106	96	106	96	98	96	122	118	120	97	91	98	94	125	117	93	97	98	93
Borrelia burgdorferi B31	105	135	95	101	123	97	148	141	139	128	88	93	95	116	100	126	100	118	124	119	130	91	118	144	150	145	109	130	112	130	105	100	106	99	101	103	123	121	118	103	93	94	92	119	119	98	97	98	98
Borrelia garinii PBi	107	133	95	99	124	96	145	135	134	129	92	89	96	113	95	125	98	121	125	118	131	87	121	146	147	148	106	128	113	130	106	97	104	100	102	101	120	117	118	97	93	97	98	123	121	99	96	96	98
Bradyrhizobium japonicum USDA 110	326	442	357	297	450	247	614	447	447	488	257	257	417	334	312	419	315	362	356	360	439	269	369	545	518	509	311	456	347	531	361	392	366	367	365	338	366	370	327	250	425	471	426	371	329	279	364	363	330
Bradyrhizobium sp. BTAi1	328	430	350	305	435	239	604	430	424	476	257	254	415	336	291	397	303	343	336	349	427	265	362	538	515	502	315	440	351	528	358	388	367	367	364	340	352	361	317	241	416	464	435	356	340	278	360	351	333
Bradyrhizobium sp. ORS278	317	414	352	295	427	236	604	431	424	488	241	253	404	333	288	396	296	339	332	348	422	262	363	514	493	494	323	432	351	521	354	384	363	361	360	335	350	356	310	239	419	456	433	347	322	277	354	346	320
Brucella abortus biovar 1 str. 9-941	246	332	283	252	324	193	459	371	365	397	201	207	313	279	247	335	255	281	286	300	328	214	292	408	405	390	256	339	276	414	294	310	306	307	297	276	274	292	250	196	312	337	315	292	264	229	285	289	260
Brucella canis ATCC 23365	255	338	289	254	326	198	469	375	369	404	205	211	318	282	246	341	257	283	291	302	334	216	297	413	414	392	260	349	275	418	301	318	307	312	303	280	281	300	256	200	320	345	318	294	273	230	289	293	265
Brucella melitensis 16M	254	334	290	255	330	199	466	376	370	403	200	208	316	280	242	339	258	279	293	302	336	220	295	417	416	394	263	341	279	421	297	320	311	307	291	277	275	297	247	203	318	345	321	290	265	229	284	290	255
Brucella ovis ATCC 25840	242	323	284	246	324	190	452	364	357	382	200	205	296	277	241	331	251	276	281	295	330	213	290	407	407	387	259	338	275	402	290	303	289	293	282	267	276	294	251	193	305	333	306	291	267	225	275	276	254
Brucella suis 1330	257	343	292	255	325	201	475	378	372	405	207	209	319	280	248	339	258	286	293	306	330	217	296	413	413	395	262	346	277	421	302	319	308	313	302	279	281	299	259	201	320	348	321	294	273	230	289	294	264
Buchnera aphidicola str. APS (Acyrthosiphon pisum)	107	138	125	117	153	87	167	145	147	156	96	118	128	126	130	150	138	133	141	145	155	115	144	164	160	154	133	157	132	162	147	141	124	121	123	120	122	131	111	96	127	134	129	129	121	89	118	120	113
Burkholderia ambifaria AMMD	300	395	349	286	407	222	567	440	432	443	242	246	398	315	284	389	284	333	343	344	398	250	337	509	482	482	300	415	328	478	333	384	340	341	342	323	349	358	302	230	411	444	407	356	325	267	363	362	304
Burkholderia cenocepacia AU 1054	298	396	351	283	400	220	572	426	419	446	244	247	404	320	282	392	291	334	334	340	405	250	344	499	492	482	303	407	327	478	334	385	343	343	347	321	340	355	303	224	404	436	408	354	326	273	366	366	308
Burkholderia mallei ATCC 23344	275	366	321	274	383	215	517	397	395	414	238	236	369	300	268	370	270	309	316	321	380	236	323	465	456	425	286	390	306	443	317	355	327	332	329	311	318	340	286	221	373	405	377	322	298	258	325	329	296
Burkholderia multivorans ATCC 17616	302	382	351	289	395	218	548	426	420	444	242	244	392	311	283	390	283	323	332	325	397	254	329	505	487	471	300	404	316	471	334	373	351	351	360	327	344	358	300	230	401	434	404	351	327	268	354	350	306
Burkholderia pseudomallei 1106a	296	388	341	282	400	229	548	425	419	432	249	246	387	307	280	383	289	325	331	337	397	245	339	489	484	460	301	412	328	472	342	373	351	351	353	325	346	355	303	232	394	435	394	337	320	287	343	350	305
Burkholderia sp. 383	300	409	353	299	420	224	575	443	438	455	254	248	417	334	285	410	291	335	335	354	425	254	350	522	507	490	315	420	329	492	344	393	350	348	354	335	355	359	310	237	430	461	429	360	327	275	373	361	323
Burkholderia thailandensis E264	292	390	346	292	398	226	544	421	418	422	248	248	390	316	280	387	294	329	331	332	405	249	332	493	461	447	300	415	319	467	331	371	346	348	346	324	344	349	298	232	381	434	393	337	321	279	343	350	301
Burkholderia vietnamiensis G4	291	390	338	288	414	215	561	436	429	446	242	244	402	321	285	391	287	336	341	345	413	260	335	512	509	501	307	423	337	475	332	372	343	344	349	317	345	357	302	225	399	423	404	343	320	271	354	351	315
Burkholderia xenovorans LB400	314	441	363	313	461	249	611	446	446	479	266	262	437	347	321	420	316	361	367	366	435	274	369	562	551	523	335	462	372	502	348	403	369	368	361	343	372	378	328	254	441	488	435	366	350	294	376	372	317
Caldicellulosiruptor saccharolyticus DSM 8903	254	399	336	306	409	244	412	321	321	341	248	279	309	357	343	397	334	369	368	366	442	300	358	484	476	477	335	448	369	347	273	292	321	320	315	328	372	394	350	260	320	342	319	397	360	287	287	285	307
Campylobacter concisus 13826	168	248	185	177	263	136	277	228	229	224	159	173	197	248	220	260	238	252	264	240	267	190	233	310	307	297	226	300	235	245	205	208	198	202	194	208	229	241	206	138	185	205	200	234	221	158	182	183	198
Campylobacter curvus 525.92	183	273	208	184	294	146	303	243	241	267	165	186	225	260	244	289	251	276	269	262	285	197	244	340	335	317	241	317	246	272	223	226	216	207	216	225	245	255	218	142	208	222	211	257	238	169	199	212	210
Campylobacter fetus subsp. fetus 82-40	193	275	216	197	275	148	300	254	253	267	166	213	229	259	254	286	254	277	271	263	287	202	250	335	333	323	244	312	251	289	245	228	225	221	228	234	254	261	221	157	215	237	216	266	234	168	218	214	226
Campylobacter hominis ATCC BAA-381	177	243	195	182	255	134	267	228	225	237	156	186	206	240	226	256	225	249	248	231	260	198	232	293	290	284	223	265	229	250	211	204	197	205	206	207	211	232	188	141	200	204	203	225	196	151	182	186	202
Campylobacter jejuni RM1221	188	249	210	185	269	148	294	251	247	265	152	196	226	240	233	265	235	271	254	242	258	194	231	310	309	300	215	300	240	276	236	229	230	221	215	228	227	244	199	146	206	229	211	234	212	154	208	209	218
Candidatus Blochmannia floridanus	110	145	137	119	157	89	171	150	150	165	101	126	143	129	125	150	129	126	135	146	151	125	133	163	161	157	131	157	135	165	146	144	135	128	128	126	123	136	107	102	139	142	145	135	129	101	128	133	124
Candidatus Blochmannia pennsylvanicus str. BPEN	113	149	141	125	164	90	180	156	155	167	106	123	140	131	124	154	135	134	142	154	158	127	137	172	169	161	134	169	138	172	158	148	135	130	131	130	125	141	111	100	141	146	141	139	130	99	129	135	130
Candidatus Carsonella ruddii PV	33	36	28	30	38	17	35	28	28	36	19	29	33	34	29	37	35	34	35	32	36	29	35	35	35	36	33	36	37	38	34	31	29	27	28	27	25	30	18	18	33	32	31	21	20	18	28	27	25
Candidatus Desulforudis audaxviator MP104C	254	442	309	307	433	229	392	314	307	344	243	298	320	375	382	427	380	414	410	364	460	317	413	514	513	506	340	458	402	356	305	274	328	337	327	321	348	366	324	236	291	309	311	367	337	265	284	283	315
Candidatus Pelagibacter ubique HTCC1062	195	246	220	191	236	139	313	250	248	290	149	178	240	221	204	247	203	229	232	219	245	179	221	287	288	273	205	248	233	295	239	245	230	220	212	208	207	230	193	142	238	246	241	227	196	152	215	217	199
Candidatus Protochlamydia amoebophila UWE25	157	180	161	158	202	121	235	218	218	216	131	126	171	172	151	203	162	176	178	175	224	131	183	249	239	231	161	224	164	221	186	176	174	169	169	162	176	179	162	140	167	169	172	184	180	144	169	169	156
Candidatus Ruthia magnifica str. Cm (Calyptogena magnifica)	156	232	183	159	235	125	268	239	237	254	146	178	197	213	212	258	208	222	236	225	257	180	214	278	275	272	192	243	209	254	216	204	190	189	193	190	197	212	174	127	195	204	198	205	187	123	181	184	183
Candidatus Sulcia muelleri GWSS	59	74	65	64	78	38	84	68	68	75	43	62	72	68	64	71	71	70	68	73	77	66	74	79	78	72	72	79	68	81	65	78	68	68	69	62	65	69	51	40	72	70	68	63	52	40	67	69	63
Candidatus Vesicomyosocius okutanii HA	158	228	178	159	223	118	255	223	222	233	142	168	197	208	201	250	201	209	217	217	245	179	213	271	264	265	189	237	205	243	204	200	186	185	190	186	186	205	161	118	196	200	193	201	179	120	177	188	179
Carboxydothermus hydrogenoformans Z-2901	290	493	310	340	429	259	429	365	364	380	280	295	360	394	372	432	364	413	408	391	456	308	404	531	512	515	368	489	416	407	318	333	339	350	347	351	381	404	350	253	344	371	359	403	378	273	331	343	336
Caulobacter crescentus CB15	248	329	305	233	339	186	447	366	367	367	198	209	326	270	239	324	240	288	288	288	333	211	285	403	404	373	251	358	280	397	300	311	280	281	266	263	284	297	242	188	332	348	329	299	268	210	287	282	256
Caulobacter sp. K31	262	345	312	240	357	199	474	388	385	393	194	215	333	282	253	360	258	294	291	302	360	213	300	458	441	432	268	384	291	439	310	341	285	290	287	275	295	312	261	189	356	364	356	307	278	232	304	301	266
Cellvibrio japonicus Ueda107	220	307	262	229	330	181	408	323	321	344	183	195	278	269	248	338	258	290	300	307	343	217	296	395	371	385	260	363	268	357	267	271	258	255	252	246	283	296	248	188	282	292	287	293	267	192	245	251	233
Chlamydia muridarum Nigg	108	125	109	99	132	83	137	133	131	123	96	91	104	118	98	125	103	109	116	133	149	87	110	148	145	142	114	147	109	136	127	119	112	115	109	114	114	122	103	91	110	106	104	115	119	97	119	118	107
Chlamydia trachomatis 434/Bu	102	127	103	96	142	87	139	134	134	127	96	92	101	124	101	133	104	108	121	138	155	92	115	154	148	142	114	148	111	134	128	116	113	114	110	117	118	121	107	92	107	102	108	118	112	93	117	116	106
Chlamydophila abortus S26/3	111	134	110	100	150	93	148	137	138	130	99	97	110	124	110	137	115	121	128	136	157	94	121	166	156	151	115	150	117	147	130	127	119	119	110	114	118	127	108	95	112	110	113	119	121	96	125	129	109
Chlamydophila caviae GPIC	118	141	112	102	153	91	152	145	145	141	99	102	116	127	112	138	120	123	135	143	162	101	128	162	156	152	122	157	122	150	131	127	116	122	107	107	123	134	111	100	120	117	117	123	119	101	132	129	111
Chlamydophila felis Fe/C-56	123	142	111	103	157	96	158	146	145	145	103	104	117	133	120	142	126	130	137	148	166	105	132	166	161	154	124	164	129	157	132	131	127	124	116	118	128	135	115	99	119	115	119	130	123	104	126	132	118
Chlamydophila pneumoniae AR39	115	136	111	100	144	93	151	140	138	134	99	95	109	118	110	132	114	120	123	139	152	95	123	159	156	147	114	159	120	146	128	124	117	114	105	108	117	119	109	99	117	111	114	121	118	98	124	125	106
Chlorobium chlorochromatii CaD3	216	314	253	238	344	174	332	300	301	298	194	225	270	289	278	354	285	300	292	314	347	230	302	421	407	393	279	387	312	322	283	266	252	254	249	244	271	295	247	176	261	273	265	287	261	201	241	249	241
Chlorobium phaeobacteroides DSM 266	243	360	290	270	378	191	381	328	326	336	216	236	306	324	305	403	305	330	339	340	404	260	342	505	489	474	300	440	341	355	302	291	284	284	281	279	306	332	277	203	286	306	294	331	292	224	269	270	270
Chlorobium phaeovibrioides DSM 265	216	314	260	230	344	174	349	317	309	309	196	229	267	297	275	369	290	306	300	300	349	225	311	433	405	397	279	364	310	330	282	266	250	247	251	250	282	307	250	182	259	279	259	296	265	203	249	252	249
Chlorobium tepidum TLS	236	362	282	255	381	191	358	329	322	324	223	243	303	321	300	394	319	343	350	342	392	252	348	475	478	454	311	420	343	349	303	283	274	264	274	265	306	321	272	195	279	296	289	317	289	225	272	277	268
Chloroflexus aurantiacus J-10-fl	358	422	365	325	397	260	597	466	466	486	276	270	404	358	313	428	306	339	338	357	443	279	370	537	525	511	326	466	379	513	356	398	393	382	371	358	387	413	360	280	394	434	400	396	371	305	365	353	337
Chloroherpeton thalassium ATCC 35110	259	350	295	272	389	205	419	351	349	342	221	249	328	331	317	394	318	354	359	323	400	252	333	501	494	456	326	422	339	383	314	312	297	284	277	278	338	370	300	225	308	342	316	347	319	221	293	293	276
Chromobacterium violaceum ATCC 12472	276	361	300	277	383	215	494	402	398	413	231	228	337	310	263	382	278	333	324	331	395	229	332	472	458	443	290	410	322	443	311	337	321	318	318	307	330	347	298	226	344	380	333	350	302	244	312	308	300
Chromohalobacter salexigens DSM 3043	265	359	303	260	343	211	539	391	384	433	223	222	342	289	271	377	268	312	306	316	378	224	306	432	413	421	272	378	304	453	295	318	314	313	311	295	326	336	285	215	324	351	332	336	311	240	299	287	275
Citrobacter koseri ATCC BAA-895	277	370	334	290	381	231	519	414	408	433	258	251	351	336	299	385	320	353	372	347	401	254	337	495	469	454	308	418	327	445	333	350	351	343	343	334	351	367	312	242	356	367	345	371	333	282	323	329	315
Clavibacter michiganensis subsp. michiganensis NCPPB 382	243	275	283	217	297	183	412	339	334	360	191	200	288	253	214	279	210	238	236	252	300	189	248	343	346	323	244	308	243	350	268	294	271	274	263	242	258	271	242	190	305	320	299	263	241	212	265	260	233
Clostridium acetobutylicum ATCC 824	238	381	313	277	447	223	419	347	344	354	225	249	320	396	322	413	332	382	379	397	448	281	354	532	542	503	363	466	377	368	308	299	310	292	300	295	341	353	312	233	316	326	319	378	338	250	299	294	294
Clostridium beijerinckii NCIMB 8052	280	432	341	314	486	235	496	398	394	411	250	268	348	416	341	453	337	411	398	417	494	290	372	600	585	544	387	512	390	403	326	327	350	344	341	326	364	390	322	260	349	382	354	389	361	288	309	309	319
Clostridium botulinum A str. ATCC 19397	268	380	278	295	402	240	411	349	348	341	235	240	303	379	322	395	313	378	374	376	433	261	338	503	509	480	330	452	351	351	279	285	293	295	293	287	351	371	314	249	298	312	299	364	356	252	277	271	275
Clostridium difficile 630	252	375	308	279	384	250	401	351	347	334	223	229	328	368	313	392	314	368	367	384	411	263	329	499	485	462	317	407	344	359	277	308	304	296	290	287	339	369	318	239	323	338	332	378	336	255	286	288	264
Clostridium kluyveri DSM 555	249	382	288	279	439	209	406	340	335	343	220	237	317	382	333	425	331	400	390	386	427	260	346	538	534	495	347	467	373	370	303	286	301	290	295	281	349	361	311	220	309	326	308	369	334	236	287	283	279
Clostridium novyi NT	222	336	265	251	337	203	352	319	317	318	206	218	256	317	289	366	283	330	331	320	367	239	298	428	402	393	305	380	299	319	262	246	273	260	269	269	310	319	287	213	260	268	261	332	308	208	249	245	250
Clostridium perfringens ATCC 13124	226	318	263	242	332	214	365	309	309	311	209	207	260	314	271	340	275	317	321	339	380	222	289	435	420	401	289	356	303	310	243	261	266	256	262	254	311	325	274	223	272	280	276	318	304	246	264	259	238
Clostridium phytofermentans ISDg	247	345	295	279	376	232	405	318	318	345	230	226	296	341	291	384	294	341	347	368	388	243	303	474	475	450	313	405	319	340	258	278	283	278	281	271	337	346	308	238	295	318	302	356	322	254	262	246	266
Clostridium tetani E88	211	308	239	238	305	204	344	309	302	304	193	188	251	311	251	347	265	304	300	303	342	218	269	416	404	393	277	353	285	302	252	234	241	238	236	233	284	302	267	206	236	258	245	305	286	206	239	232	217
Clostridium thermocellum ATCC 27405	246	375	283	289	398	234	392	305	303	335	235	255	293	358	312	403	332	380	366	381	417	267	342	482	469	461	341	430	342	346	290	263	296	298	297	295	346	375	320	251	287	299	290	361	333	254	256	267	281
Colwellia psychrerythraea 34H	246	361	290	243	350	194	462	374	374	384	215	214	307	296	270	359	261	313	311	316	363	226	295	440	422	407	271	386	295	422	294	307	290	282	281	285	299	312	271	206	314	330	316	315	300	203	268	279	251
Corynebacterium diphtheriae NCTC 13129	196	264	240	194	262	162	352	292	291	316	174	188	267	260	220	289	218	251	261	253	300	191	258	346	340	327	249	305	260	327	263	253	240	238	238	224	248	260	215	166	269	264	263	264	241	188	230	237	213
Corynebacterium efficiens YS-314	221	299	257	224	296	175	410	321	317	355	183	193	290	277	226	299	236	267	273	263	308	206	258	371	358	339	258	307	267	376	280	278	262	256	251	245	258	286	238	175	291	302	298	260	237	205	254	247	233
Corynebacterium glutamicum R	221	297	262	229	311	177	417	325	321	361	182	198	297	281	225	297	235	265	271	267	322	206	267	376	352	336	258	323	265	370	281	282	263	254	256	242	263	280	236	184	301	325	303	269	244	217	257	258	231
Corynebacterium jeikeium K411	186	265	237	183	261	160	335	290	286	294	163	184	245	252	206	277	208	251	248	245	281	189	243	315	303	298	240	287	254	315	247	249	226	230	218	218	235	249	207	156	253	271	264	246	226	175	216	232	214
Coxiella burnetii RSA 493	188	231	214	198	255	152	284	250	249	263	158	173	230	215	193	257	197	205	209	225	258	175	219	299	297	283	200	265	211	274	221	229	218	210	211	212	210	219	193	150	249	240	241	228	214	184	224	227	202
Cytophaga hutchinsonii ATCC 33406	226	298	266	237	331	172	422	333	335	351	196	212	292	299	257	339	268	285	291	281	344	215	310	427	424	404	276	361	284	381	308	301	260	268	257	252	279	291	251	176	291	313	302	284	273	200	280	285	250
Dechloromonas aromatica RCB	271	395	293	267	397	201	496	382	382	427	229	254	355	328	300	390	312	342	331	344	409	260	343	496	472	463	305	418	331	466	328	332	320	314	313	298	320	330	280	212	358	373	359	341	311	234	299	307	289
Dehalococcoides ethenogenes 195	215	353	235	246	360	199	302	267	263	272	207	222	262	305	282	352	276	306	310	324	374	249	338	433	415	417	285	384	327	301	260	235	249	248	247	263	285	302	246	211	244	258	257	295	267	222	237	237	250
Dehalococcoides sp. BAV1	217	351	250	251	350	200	300	273	269	283	204	223	263	296	275	353	273	294	295	318	370	248	330	427	407	416	282	382	313	305	266	239	259	260	262	267	285	306	252	212	253	265	259	290	263	224	240	244	256
Deinococcus geothermalis DSM 11300	311	386	331	290	353	237	525	420	417	428	239	251	368	293	281	363	274	310	313	304	366	238	316	429	423	416	287	378	301	452	321	356	349	345	338	315	343	365	308	244	370	388	368	367	317	250	323	321	300
Deinococcus radiodurans R1	309	360	308	275	346	219	487	401	402	402	232	247	353	282	262	346	266	295	293	291	358	232	290	438	418	403	276	367	297	438	303	332	324	335	317	306	326	346	297	228	361	373	345	339	306	232	306	315	290
Delftia acidovorans SPH-1	285	375	310	273	394	215	517	408	402	427	237	232	358	312	273	359	266	305	313	324	381	227	326	457	427	420	284	394	302	465	312	358	330	330	322	303	321	336	283	217	374	393	370	330	311	248	322	324	296
Desulfatibacillum alkenivorans AK-01	301	557	329	334	519	241	513	414	404	415	263	276	360	402	401	506	397	459	450	445	555	339	443	665	637	604	364	597	430	483	336	337	351	351	360	344	391	401	343	259	364	380	370	399	380	282	333	336	343
Desulfitobacterium hafniense Y51	317	485	340	328	485	250	508	418	405	413	268	270	389	430	360	494	365	428	429	449	502	292	399	667	608	614	378	542	419	438	327	340	360	348	350	350	388	404	356	253	363	388	368	414	382	288	314	324	338
Desulfococcus oleovorans Hxd3	247	491	296	280	438	206	424	338	335	346	218	264	293	363	345	454	346	404	385	385	474	297	404	525	513	515	336	477	389	392	312	293	307	305	303	308	338	351	307	224	296	306	300	365	339	252	274	290	289
Desulfotalea psychrophila LSv54	252	405	269	275	392	212	420	346	345	348	227	235	298	355	317	409	329	388	371	391	436	262	357	505	478	483	315	454	357	383	275	286	296	288	294	298	335	356	293	220	289	304	295	358	327	239	269	279	284
Desulfotomaculum reducens MI-1	285	475	322	318	425	240	469	385	378	390	257	279	360	402	361	464	377	433	431	411	467	311	401	549	542	532	374	471	403	420	315	326	338	337	344	338	367	377	347	252	337	367	341	398	378	263	291	318	336
Desulfovibrio desulfuricans G20	257	451	286	304	430	215	436	348	345	383	238	263	307	367	347	463	354	422	415	392	463	290	400	552	534	530	339	483	380	390	294	282	317	310	314	313	342	359	308	216	296	317	317	357	331	268	270	271	305
Desulfovibrio vulgaris subsp. vulgaris DP4	261	448	289	301	453	224	410	360	355	363	243	275	320	363	343	438	356	417	397	379	443	290	388	526	527	500	331	480	390	372	302	297	309	318	308	316	329	345	297	225	297	314	313	352	335	256	276	276	298
Dichelobacter nodosus VCS1703A	137	169	150	135	190	121	207	198	199	186	118	128	151	180	145	191	152	174	176	179	211	130	166	225	219	215	168	209	167	210	173	168	146	148	146	150	173	178	155	117	156	171	160	181	172	141	157	161	136
Dictyoglomus thermophilum H-6-12	271	396	331	339	366	276	364	296	295	322	267	270	302	339	313	357	305	333	333	325	402	287	358	442	432	411	321	392	340	314	250	291	326	334	323	317	390	409	358	294	309	340	309	391	365	324	281	281	309
Dictyoglomus turgidum DSM 6724	276	383	327	343	357	276	359	294	291	318	264	266	292	326	310	359	301	321	324	316	387	282	349	434	417	401	318	392	329	305	255	282	327	327	318	321	389	410	353	294	297	326	300	381	352	326	280	278	313
Dinoroseobacter shibae DFL 12	295	354	305	270	338	221	527	403	397	452	225	236	350	300	257	380	268	308	310	308	362	247	316	448	449	430	275	370	317	474	319	325	322	313	301	289	302	316	279	221	341	379	349	310	294	231	279	281	280
Ehrlichia canis str. Jake	117	164	133	119	159	107	193	176	175	177	107	118	144	148	135	168	138	145	151	157	160	118	150	184	180	177	135	163	154	198	166	149	132	124	131	130	134	148	133	99	142	143	145	143	126	102	139	145	125
Ehrlichia chaffeensis str. Arkansas	119	158	138	119	164	110	196	175	175	175	109	115	141	151	140	163	139	148	156	154	165	122	153	189	179	176	137	165	157	191	167	152	135	127	133	126	134	148	130	98	146	144	149	139	123	105	143	145	126
Ehrlichia ruminantium str. Gardel	122	156	136	120	161	110	186	168	169	173	110	120	142	146	136	166	138	141	150	158	163	118	151	183	180	172	138	164	161	191	163	160	136	132	134	128	136	142	135	98	143	145	145	147	128	105	141	147	124
Enterobacter sakazakii ATCC BAA-894	267	343	314	261	369	221	491	384	382	401	233	249	339	305	278	377	280	327	338	323	391	232	308	465	460	442	282	402	309	425	302	333	312	318	316	304	330	356	300	229	336	358	347	345	306	258	304	302	282
Enterobacter sp. 638	270	345	321	268	389	224	495	388	387	424	237	252	337	305	279	371	295	339	343	329	379	232	315	471	459	452	290	402	318	440	318	340	332	340	316	309	343	365	300	232	341	351	337	363	322	276	322	313	286
Enterococcus faecalis V583	209	260	246	220	293	205	347	293	294	301	178	176	251	272	215	277	216	248	256	270	316	185	243	340	337	316	231	309	242	301	223	243	226	232	222	215	277	286	252	190	249	266	262	288	252	218	230	227	204
Erwinia carotovora subsp. atroseptica SCRI1043	266	336	321	265	371	222	493	378	371	408	244	248	341	309	269	355	285	343	348	330	380	229	315	465	450	434	295	398	315	423	316	329	318	316	317	308	331	352	296	224	342	367	333	339	313	281	307	299	290
Erythrobacter litoralis HTCC2594	211	293	244	209	304	174	412	349	344	337	183	207	280	265	227	317	231	262	271	281	317	210	257	385	360	361	246	320	263	392	275	284	260	257	251	238	261	278	234	171	290	283	283	274	243	183	253	249	230
Escherichia coli K12	271	359	328	283	378	220	502	387	384	416	252	251	346	309	296	380	290	328	337	337	389	246	325	472	452	449	299	403	315	422	311	346	326	332	325	319	344	356	302	242	358	380	337	365	326	279	318	319	292
Exiguobacterium sibiricum 255-15	255	322	291	243	343	219	473	396	391	378	211	227	306	301	249	344	259	304	301	319	371	219	290	430	411	409	269	354	275	401	289	305	295	298	278	272	309	326	288	220	325	336	309	331	305	238	295	293	256
Fervidobacterium nodosum Rt17-B1	256	329	262	271	282	254	331	294	295	275	245	208	246	266	254	307	248	277	281	268	315	216	257	354	337	335	237	317	269	298	227	261	273	275	269	266	367	377	356	272	260	272	254	388	361	270	259	256	254
Flavobacterium johnsoniae UW101	229	308	295	237	354	189	460	363	360	371	208	216	322	290	238	343	247	294	286	300	342	208	285	430	430	421	268	374	276	390	304	336	278	282	274	259	286	301	247	203	310	335	321	290	272	207	288	298	245
Flavobacterium psychrophilum JIP02/86	198	247	233	197	283	160	346	302	300	287	171	184	256	244	210	286	227	243	243	251	280	185	243	336	332	328	227	312	241	308	259	268	221	222	217	213	229	249	202	164	247	272	260	248	232	172	244	243	215
Francisella philomiragia subsp. philomiragia ATCC 25017	188	266	232	209	287	171	318	288	286	284	170	187	259	247	221	295	231	252	260	261	294	199	247	342	328	323	249	295	253	313	247	261	223	225	218	226	246	263	225	174	253	263	257	262	237	176	239	246	219
Francisella tularensis subsp. holarctica	167	210	198	176	230	153	259	246	245	233	146	157	213	197	177	239	182	201	202	212	236	161	203	269	265	256	195	239	203	256	210	219	189	185	185	183	212	215	189	155	214	224	211	213	197	157	208	207	173
Frankia alni ACN14a	299	357	329	272	365	213	508	388	383	406	230	246	353	321	257	354	262	293	300	299	366	242	330	472	451	440	295	375	334	426	332	335	324	335	329	308	310	335	282	230	368	392	372	328	290	246	310	319	295
Frankia sp. CcI3	272	343	308	277	354	208	462	382	379	407	226	238	340	314	269	347	273	301	296	300	368	239	320	449	431	427	289	388	325	415	327	324	311	317	312	293	316	329	273	217	339	371	350	326	278	234	300	302	282
Frankia sp. EAN1pec	289	366	333	275	367	212	504	376	370	422	231	247	367	322	271	366	281	312	300	315	389	248	332	491	473	441	304	391	317	430	336	341	330	321	310	305	309	344	275	219	382	410	376	314	286	263	319	326	288
Fusobacterium nucleatum subsp. nucleatum ATCC 25586	181	255	192	197	250	168	280	247	242	239	151	158	205	254	213	274	221	240	251	273	272	164	227	338	316	310	219	287	218	261	217	206	207	191	196	197	240	250	218	164	207	219	210	250	243	165	216	211	187
Geobacillus kaustophilus HTA426	317	413	353	305	388	250	574	464	459	468	271	272	392	350	310	396	303	368	358	348	412	271	342	494	479	463	311	428	335	512	337	369	365	359	364	329	375	399	331	264	401	435	400	382	353	293	344	357	317
Geobacillus thermodenitrificans NG80-2	316	423	357	307	388	251	568	465	461	453	262	271	384	356	308	390	307	365	357	353	425	266	342	499	485	455	317	421	336	488	341	371	369	364	364	335	369	403	338	265	397	424	391	379	350	287	356	352	315
Geobacter bemidjiensis Bem	308	456	340	345	496	252	513	406	401	411	265	288	380	399	369	459	393	435	426	421	508	323	412	602	584	573	374	547	425	454	373	348	360	349	355	338	392	403	342	254	369	399	368	405	377	296	346	346	332
Geobacter lovleyi SZ	262	424	290	285	471	217	426	360	362	372	243	256	343	376	354	456	363	420	407	407	471	288	389	553	546	525	349	524	409	404	341	309	311	307	310	300	355	368	316	222	330	346	326	372	341	249	294	306	287
Geobacter metallireducens GS-15	298	440	317	324	459	238	476	383	381	383	246	278	371	385	361	452	373	409	407	392	486	311	419	583	547	543	360	508	400	432	346	348	355	340	355	328	361	387	323	242	357	389	358	384	356	275	332	336	319
Geobacter sulfurreducens PCA	276	446	314	328	474	237	471	390	382	390	255	276	363	396	359	485	378	428	417	405	493	303	420	597	567	560	355	536	407	439	345	333	348	342	341	324	365	385	322	236	344	380	343	388	362	279	316	325	321
Geobacter uraniireducens Rf4	309	461	334	325	520	255	499	417	418	415	258	300	388	400	384	493	397	439	437	432	532	323	450	631	610	602	381	576	423	464	373	348	369	358	369	351	381	392	342	266	378	397	374	409	375	292	342	339	338
Gloeobacter violaceus PCC 7421	273	349	300	274	383	202	475	385	381	410	231	233	334	314	291	385	297	321	318	315	397	249	358	488	484	469	298	419	326	414	340	320	316	305	303	304	299	331	264	218	333	356	345	316	300	245	300	301	286
Gluconacetobacter diazotrophicus PAl 5	248	299	306	238	343	196	419	349	349	351	206	204	321	282	240	345	241	290	283	291	333	210	296	404	408	392	246	364	265	373	285	315	287	284	286	265	288	303	256	202	339	356	328	305	275	215	291	293	267
Gluconobacter oxydans 621H	196	256	252	203	294	170	348	286	285	307	173	190	256	246	217	286	224	251	249	251	282	190	243	355	345	317	219	293	235	317	260	279	234	247	234	225	254	261	226	168	270	271	282	253	243	181	248	254	226
Gramella forsetii KT0803	218	293	269	228	318	176	421	350	344	361	190	203	293	275	251	342	247	279	272	275	318	218	272	401	393	375	253	331	267	369	292	307	269	272	267	255	278	301	245	184	301	314	302	284	271	194	278	281	243
Granulibacter bethesdensis CGDNIH1	232	305	273	229	332	188	390	326	328	345	187	221	317	277	251	341	253	290	283	287	337	234	294	402	397	383	268	353	289	374	292	301	276	276	270	263	259	269	228	169	307	325	326	265	241	195	270	279	257
Haemophilus ducreyi 35000HP	151	196	159	156	219	130	239	219	216	207	141	150	173	193	170	210	176	196	203	209	233	137	177	244	233	224	177	230	188	223	181	172	171	167	162	159	191	195	175	140	169	177	172	210	194	148	165	168	156
Haemophilus influenzae PittEE	168	224	183	174	232	153	287	248	246	261	148	164	203	218	198	247	198	221	232	240	249	165	214	287	276	262	202	260	204	260	216	200	201	202	194	195	212	228	190	156	198	205	204	236	205	170	177	187	192
Haemophilus somnus 129PT	177	223	199	182	241	152	281	244	242	263	155	167	196	216	187	247	196	227	233	237	256	163	198	292	269	271	205	256	212	266	205	209	202	194	199	191	217	223	194	155	204	210	201	229	206	169	198	198	187
Hahella chejuensis KCTC 2396	300	410	333	294	415	241	548	426	423	443	266	251	359	344	292	428	311	361	359	362	423	254	351	548	505	508	303	447	338	487	329	358	351	351	339	319	354	368	304	244	365	388	364	366	342	276	328	331	304
Halorhodospira halophila SL1	240	344	275	241	351	197	424	347	345	355	208	235	297	290	280	362	273	317	314	324	373	248	315	425	404	398	262	367	308	404	296	288	281	286	272	270	299	315	264	197	302	303	306	314	282	215	265	273	271
Helicobacter acinonychis str. Sheeba	153	202	165	153	210	124	225	199	202	206	138	158	185	189	177	205	185	198	203	202	206	149	182	240	240	223	186	218	179	223	181	173	168	163	170	171	172	187	162	121	183	186	182	188	178	134	171	173	164
Helicobacter hepaticus ATCC 51449	163	250	203	186	269	140	286	234	233	254	162	195	214	251	225	270	239	251	247	247	273	190	230	313	313	305	228	277	240	270	228	208	209	208	209	209	224	239	203	133	203	215	215	233	204	157	202	200	203
Helicobacter pylori J99	157	215	175	154	219	123	237	204	204	217	148	158	196	205	183	209	186	205	214	209	209	157	187	252	246	234	189	227	186	230	188	185	171	176	179	180	190	195	168	129	190	195	194	189	182	142	178	183	175
Heliobacterium modesticaldum Ice1	256	416	275	302	414	227	407	344	343	361	240	262	324	367	340	419	345	392	390	373	436	279	371	485	488	476	350	463	394	364	291	289	301	302	307	298	331	343	300	222	299	317	311	345	326	244	284	287	292
Herminiimonas arsenicoxydans	235	310	273	239	338	171	430	334	332	374	193	215	305	298	253	348	268	296	292	301	350	208	296	409	397	377	275	368	288	408	298	301	294	288	291	281	271	290	244	182	311	319	303	283	260	217	275	279	276
Herpetosiphon aurantiacus ATCC 23779	346	411	371	323	407	256	580	468	464	466	274	268	393	352	303	410	310	328	339	343	436	267	363	550	529	492	321	445	355	502	370	383	368	366	363	342	389	414	356	265	410	428	399	414	368	300	368	363	329
Hydrogenobaculum sp. Y04AAS1	239	324	280	257	324	203	318	272	271	281	213	262	324	284	279	305	297	303	304	267	331	244	297	382	376	361	279	329	293	305	270	282	302	290	290	280	293	306	269	199	313	330	318	308	278	216	274	284	274
Hyphomonas neptunium ATCC 15444	248	319	286	229	330	178	446	365	365	370	190	212	300	273	236	324	235	270	282	289	344	211	290	406	389	382	252	339	287	409	301	309	273	264	261	253	281	292	242	192	310	328	316	281	262	196	274	275	246
Idiomarina loihiensis L2TR	222	285	243	207	295	180	397	340	335	315	188	200	261	259	233	319	227	269	276	286	302	198	253	356	350	341	246	310	251	374	261	264	252	245	247	241	267	276	241	185	270	274	266	285	263	169	246	239	225
Jannaschia sp. CCS1	281	351	292	266	342	209	506	385	382	440	220	221	340	285	259	364	264	305	309	311	345	228	306	445	431	420	267	353	306	447	301	335	313	306	306	282	300	322	275	214	348	380	347	317	277	240	294	290	273
Janthinobacterium sp. Marseille	257	331	293	246	363	187	464	361	358	401	209	228	319	298	257	350	265	299	296	300	362	217	303	435	406	403	276	394	281	427	309	303	314	303	298	296	284	297	252	197	334	345	325	286	268	220	276	285	280
Kineococcus radiotolerans SRS30216	250	318	311	239	339	198	498	382	377	405	207	219	309	288	244	318	238	279	281	289	359	215	278	420	413	395	272	348	285	404	293	324	286	287	290	261	278	299	258	209	315	366	322	294	271	241	289	285	259
Klebsiella pneumoniae subsp. pneumoniae MGH 78578	291	380	350	298	409	236	558	426	421	461	254	264	377	345	313	401	320	368	375	368	417	267	357	517	504	495	319	435	350	459	349	369	357	351	344	330	362	398	323	255	377	416	384	388	345	282	347	340	319
Lactobacillus acidophilus NCFM	157	188	182	165	222	144	239	214	211	226	136	140	185	202	157	199	163	181	183	201	217	153	181	262	251	238	179	227	187	222	166	190	174	175	170	165	208	212	186	145	193	204	192	206	183	172	183	173	154
Lactobacillus brevis ATCC 367	168	210	191	166	235	153	271	242	239	233	143	135	202	203	171	199	158	191	198	230	254	138	180	280	270	255	188	242	181	246	184	201	173	174	174	161	195	209	189	159	205	219	208	212	199	173	192	197	154
Lactobacillus casei ATCC 334	202	237	232	195	276	171	325	290	288	285	171	172	238	242	192	266	200	226	236	244	279	184	226	325	331	303	221	307	227	295	214	245	223	225	210	205	237	239	213	176	237	256	238	238	220	200	224	227	195
Lactobacillus delbrueckii subsp. bulgaricus ATCC BAA-365	144	185	159	158	214	137	233	207	206	215	137	137	185	199	149	213	163	184	188	195	217	149	186	242	243	229	179	226	183	213	163	176	162	165	154	164	198	200	189	142	174	195	178	195	185	155	167	166	154
Lactobacillus gasseri ATCC 33323	137	179	168	156	204	139	227	204	202	208	134	128	165	183	148	190	147	169	164	192	210	140	172	241	226	216	164	214	178	211	155	180	149	151	147	146	188	184	169	142	183	194	175	181	176	169	170	160	134
Lactobacillus helveticus DPC 4571	148	188	169	164	219	153	239	213	212	218	129	135	172	199	160	219	157	184	192	210	219	150	183	259	256	242	192	228	183	219	171	174	160	164	160	160	197	202	184	143	176	190	183	197	179	159	175	165	155
Lactobacillus johnsonii NCC 533	145	179	168	155	204	139	228	213	207	202	133	134	174	186	139	191	146	168	172	191	209	135	176	246	238	225	167	209	174	212	155	178	150	151	146	149	190	188	176	144	181	197	179	195	181	174	168	164	147
Lactobacillus plantarum WCFS1	202	282	255	219	313	170	359	308	300	319	173	193	264	284	240	300	222	265	267	287	332	201	256	369	371	345	261	315	265	320	235	269	243	247	241	237	268	278	244	186	263	283	261	280	256	212	240	232	222
Lactobacillus reuteri F275	167	222	209	176	256	152	280	251	248	250	163	151	226	239	203	247	186	229	227	241	266	171	212	297	304	285	220	267	220	261	216	226	190	189	197	183	207	217	191	153	223	243	231	213	206	170	227	220	179
Lactobacillus sakei subsp. sakei 23K	164	202	195	174	237	160	275	237	237	236	150	144	199	211	170	229	168	203	206	218	254	150	199	271	279	273	202	251	208	245	189	203	176	188	180	173	208	217	193	167	204	210	208	213	193	173	197	194	164
Lactobacillus salivarius UCC118	162	219	198	188	245	149	275	248	248	248	148	151	213	231	184	250	185	217	225	225	256	170	208	286	288	281	215	263	209	262	199	214	186	196	185	177	220	219	200	154	208	227	209	219	199	172	201	198	170
Lactococcus lactis subsp. cremoris MG1363	188	255	238	204	291	174	320	277	279	297	164	186	236	266	215	277	222	249	250	271	309	186	251	353	345	323	240	300	245	304	222	252	229	237	232	220	261	279	224	177	246	261	249	265	238	195	226	223	212
Lawsonia intracellularis PHE/MN1-00	159	244	170	178	274	140	252	232	229	224	153	157	181	224	208	251	223	233	225	241	270	190	225	294	303	289	217	282	232	231	189	184	178	189	182	176	217	224	206	139	181	185	174	207	196	166	181	187	176
Legionella pneumophila str. Paris	246	297	276	238	321	192	385	328	325	329	197	209	288	264	230	312	237	260	271	269	324	205	273	402	380	367	243	341	258	353	268	293	270	272	274	256	262	282	242	188	296	295	300	285	265	218	275	287	252
Legionella pneumophila subsp. pneumophila str. Philadelphia 1	245	294	277	231	310	188	381	329	324	332	190	207	287	258	227	315	232	256	260	260	319	204	267	392	373	354	238	340	258	355	273	291	269	274	273	253	259	279	240	185	287	288	290	281	260	215	271	274	249
Leifsonia xyli subsp. xyli str. CTCB07	192	239	232	192	260	149	330	276	277	287	160	181	233	230	201	258	205	219	224	227	268	181	220	298	299	286	218	265	223	300	234	242	218	225	226	211	221	238	204	155	243	261	243	232	219	183	218	210	199
Leptospira borgpetersenii serovar Hardjo-bovis JB197	219	296	253	203	314	170	362	301	304	312	171	207	267	264	246	315	259	282	280	259	315	207	263	366	372	357	257	335	256	333	298	276	261	248	250	241	258	273	233	161	271	278	276	275	248	178	256	261	242
Leptospira interrogans serovar Copenhageni str. Fiocruz L1-130	230	313	263	218	339	170	370	312	312	316	177	212	280	272	251	329	267	300	288	274	323	208	285	397	380	386	264	358	270	355	302	290	267	255	253	244	264	283	246	164	286	289	288	284	249	187	269	265	236
Leptothrix cholodnii SP-6	279	379	309	283	380	217	536	368	364	411	235	249	348	317	283	386	279	345	344	325	400	250	345	468	451	448	286	405	322	450	314	321	331	333	324	309	321	340	284	211	368	384	361	330	293	266	291	303	290
Leuconostoc mesenteroides subsp. mesenteroides ATCC 8293	175	247	224	199	271	155	309	267	265	284	150	170	242	254	204	257	205	235	241	249	278	187	222	325	324	298	237	291	227	290	219	225	212	223	210	206	239	253	207	164	239	248	238	243	221	181	201	203	198
Listeria innocua Clip11262	245	328	286	255	366	201	422	377	375	383	209	219	298	309	275	359	271	318	327	328	370	241	290	431	429	401	281	383	297	382	277	314	278	277	269	257	306	331	280	199	302	334	307	319	287	233	299	290	247
Listeria monocytogenes EGD-e	253	332	293	253	371	200	423	372	369	374	210	222	301	311	269	351	272	322	329	328	373	239	297	423	417	392	280	380	299	384	276	315	287	283	273	270	302	324	282	204	308	334	307	311	286	231	298	291	258
Listeria welshimeri serovar 6b str. SLCC5334	244	316	276	250	351	205	416	368	367	372	207	217	290	298	262	345	264	312	325	325	365	237	289	414	407	391	273	365	289	376	275	306	274	272	264	258	306	325	271	198	293	316	296	316	279	230	286	279	246
Magnetococcus sp. MC-1	235	353	265	248	371	183	415	341	339	358	196	237	300	311	293	394	317	338	331	322	380	264	332	446	444	440	299	388	331	386	303	283	267	265	277	264	306	322	278	180	285	299	305	309	298	202	266	270	265
Magnetospirillum magneticum AMB-1	256	381	306	265	383	193	439	359	353	368	209	237	350	321	291	378	300	331	337	318	382	240	330	473	439	457	295	418	326	415	313	307	325	316	327	304	301	321	263	191	344	355	336	314	293	228	300	299	296
Mannheimia succiniciproducens MBEL55E	193	274	234	214	292	181	343	290	285	296	179	197	250	263	231	283	242	272	283	287	293	201	230	361	346	331	245	315	252	301	239	246	247	242	250	239	243	272	222	181	254	256	247	276	252	204	216	222	229
Maricaulis maris MCS10	240	308	272	221	304	183	423	350	344	349	194	215	292	264	237	319	239	271	275	278	328	209	277	399	374	367	247	325	278	390	288	292	265	258	251	248	270	282	242	183	294	314	295	284	260	194	273	272	229
Marinobacter aquaeolei VT8	270	371	285	256	352	195	498	383	382	422	216	233	323	312	276	387	278	333	330	330	367	221	317	465	432	443	288	394	297	467	308	310	316	309	313	288	320	336	281	205	322	330	322	329	304	211	283	284	278
Marinomonas sp. MWYL1	256	354	308	256	362	212	528	402	403	425	224	214	340	311	275	393	283	338	331	333	379	231	303	474	443	423	283	393	302	441	307	323	299	307	308	289	322	333	283	223	341	361	342	322	298	243	294	296	280
Mesoplasma florum L1	84	94	85	79	98	81	122	115	116	119	76	68	80	92	75	97	84	89	89	90	102	73	86	115	109	105	84	104	82	118	83	99	93	91	86	80	91	100	83	80	90	94	87	95	95	85	96	89	82
Mesorhizobium loti MAFF303099	322	400	361	298	401	235	572	428	421	460	252	240	398	322	286	420	279	329	331	342	426	259	352	530	530	495	299	425	336	486	347	376	368	357	355	330	347	347	309	245	400	438	410	345	322	285	352	348	311
Mesorhizobium sp. BNC1	291	390	335	273	373	230	535	397	393	454	243	238	357	314	265	380	271	313	326	317	385	241	331	473	461	438	290	388	322	451	330	350	348	339	343	314	315	339	293	225	374	398	376	335	316	265	318	313	301
Methylacidiphilum infernorum V4	243	303	261	247	327	205	369	304	304	319	214	238	293	282	252	316	270	276	275	274	332	235	303	391	386	369	263	329	297	343	289	289	282	276	284	262	271	296	238	199	290	318	299	290	259	223	274	280	252
Methylibium petroleiphilum PM1	268	376	282	268	381	204	497	379	381	419	228	248	354	303	283	378	285	321	319	333	389	240	332	452	443	435	295	398	314	458	326	322	315	321	311	297	310	326	261	207	356	367	343	309	295	240	290	295	287
Methylobacillus flagellatus KT	223	310	247	227	344	181	385	317	317	354	198	217	288	291	261	364	277	308	311	313	351	231	305	426	423	409	285	365	301	372	269	284	260	253	251	250	269	287	242	192	292	301	283	282	254	198	248	253	246
Methylobacterium chloromethanicum CM4	291	363	303	262	391	204	515	399	395	450	216	233	359	325	278	388	286	322	322	332	402	254	340	483	476	456	295	403	326	464	321	350	317	317	308	295	308	327	276	204	355	384	370	308	291	234	314	309	290
Methylobacterium extorquens PA1	288	363	305	265	380	203	509	395	390	438	208	231	356	319	273	376	277	316	313	329	393	244	339	470	469	447	292	392	320	456	319	343	316	311	302	288	306	329	278	202	354	372	367	314	288	229	309	304	281
Methylobacterium radiotolerans JCM 2831	296	384	323	277	416	216	551	412	410	472	221	240	374	332	293	408	299	341	339	348	414	264	356	488	479	464	306	433	344	487	327	343	349	336	320	315	331	338	294	222	369	394	381	331	314	241	320	319	308
Methylobacterium sp. 4-46	314	399	332	278	405	220	571	406	404	470	236	236	377	318	294	399	306	333	338	357	423	269	353	487	487	478	300	419	346	490	344	366	357	347	335	310	316	349	285	230	393	415	392	335	311	256	336	329	307
Methylocella silvestris BL2	257	360	279	252	381	191	440	363	364	375	201	219	348	301	269	365	264	309	314	331	383	250	326	470	465	459	283	394	316	409	310	319	301	297	300	283	288	298	259	190	317	354	341	299	268	207	279	288	273
Methylococcus capsulatus str. Bath	253	352	274	266	379	206	418	338	339	363	230	235	319	333	315	401	310	349	341	334	395	277	348	468	454	444	309	406	347	383	314	310	302	297	290	278	317	343	279	207	321	335	332	332	299	242	279	293	273
Microcystis aeruginosa NIES-843	261	360	286	274	395	200	459	372	374	424	231	251	325	318	327	386	323	334	336	329	384	260	342	477	467	458	315	432	339	424	321	316	298	300	297	290	296	324	264	215	318	353	332	324	288	235	295	305	281
Moorella thermoacetica ATCC 39073	276	469	343	339	448	254	425	349	344	366	263	279	361	394	377	472	375	425	411	407	480	317	436	577	569	554	366	515	420	383	295	323	348	342	341	348	372	388	343	272	353	370	341	392	364	291	312	324	340
Mycobacterium avium 104	261	351	320	240	345	195	473	374	371	393	220	221	361	301	251	334	257	283	285	279	334	229	300	420	415	390	287	350	303	426	324	339	291	298	296	277	290	313	267	201	368	387	362	305	285	240	304	314	262
Mycobacterium bovis AF2122/97	257	332	301	232	331	200	444	347	345	376	213	223	353	285	257	319	256	272	266	283	338	226	295	408	407	370	276	345	301	407	324	331	282	283	278	263	288	302	263	197	343	383	342	307	280	220	299	304	253
Mycobacterium gilvum PYR-GCK	287	389	311	261	360	215	534	400	393	430	229	231	362	329	267	367	258	309	308	305	373	231	309	476	447	436	309	376	323	474	341	344	295	301	304	296	321	335	286	224	375	403	371	338	309	262	304	311	271
Mycobacterium leprae TN	182	239	228	183	250	145	305	266	267	276	152	174	232	222	198	256	201	209	216	219	255	181	230	284	283	263	222	256	224	286	248	234	206	207	206	211	214	225	192	140	225	241	232	219	201	155	218	209	195
Mycobacterium smegmatis str. MC2 155	317	406	366	289	384	241	573	446	439	477	250	253	421	352	279	373	278	322	324	327	394	248	343	510	481	464	317	405	344	504	353	387	344	353	350	325	351	373	316	240	432	467	419	371	343	288	371	358	309
Mycobacterium sp. JLS	291	401	343	268	370	224	546	415	408	450	240	248	382	333	271	362	267	307	305	311	373	244	325	481	470	435	311	386	339	473	346	362	322	325	323	303	325	340	293	228	397	424	397	344	319	265	331	331	290
Mycobacterium sp. KMS	288	402	336	266	364	221	552	415	405	450	239	249	383	331	271	359	270	310	302	304	372	241	323	478	465	434	311	386	339	470	340	365	319	321	320	302	328	340	290	228	393	417	397	341	314	257	331	327	290
Mycobacterium sp. MCS	290	398	337	267	366	224	550	415	405	450	242	249	384	332	273	362	270	311	303	305	372	243	326	474	464	433	312	386	339	471	340	367	322	322	321	304	326	340	291	229	395	417	401	342	315	258	332	330	294
Mycobacterium tuberculosis CDC1551	257	328	296	236	328	196	446	344	343	378	213	220	344	288	255	320	251	270	266	285	341	224	294	406	406	367	277	341	299	408	321	329	280	278	279	260	286	299	261	194	339	382	340	305	276	219	296	303	251
Mycobacterium ulcerans Agy99	254	336	295	230	317	195	459	351	349	372	211	212	335	287	251	320	256	272	271	267	327	219	284	409	400	366	272	331	295	413	309	326	272	270	273	257	279	298	258	195	343	385	347	295	277	223	285	291	246
Mycobacterium vanbaalenii PYR-1	297	411	333	276	368	224	552	423	418	457	240	246	382	332	272	375	275	316	314	316	388	241	323	483	473	450	313	397	329	485	356	364	323	317	319	312	334	351	289	235	387	423	390	344	315	276	318	322	287
Mycoplasma agalactiae PG2	76	80	68	72	93	74	113	107	108	105	74	56	76	82	72	85	63	75	78	88	90	59	77	102	105	103	77	93	77	104	77	76	80	80	82	75	81	83	80	70	74	77	78	84	83	76	78	81	71
Mycoplasma capricolum subsp. capricolum ATCC 27343	89	96	96	85	111	87	125	124	123	119	81	78	91	93	78	104	87	94	96	105	107	77	95	121	116	114	92	114	82	118	87	100	98	92	98	92	105	105	97	88	99	99	95	108	109	95	105	98	88
Mycoplasma gallisepticum R	75	87	69	71	94	75	111	112	111	101	68	64	78	78	64	84	72	76	79	88	91	62	83	101	109	105	83	96	80	105	77	88	76	72	74	69	86	84	76	78	80	82	78	80	84	78	88	86	69
Mycoplasma hyopneumoniae 232	69	76	73	64	85	71	98	93	93	94	64	56	73	69	64	74	63	70	74	74	79	62	66	94	92	95	66	85	73	92	68	75	76	72	72	67	76	82	70	73	77	77	71	74	73	76	70	65	66
Mycoplasma mobile 163K	66	84	66	69	88	72	109	95	95	103	65	63	78	72	72	89	71	82	87	76	87	56	75	105	105	104	80	97	79	97	79	82	73	73	71	69	80	84	76	71	79	79	77	83	87	71	80	82	68
Mycoplasma mycoides subsp. mycoides SC str. PG1	93	101	98	91	111	91	127	123	122	123	78	74	94	97	82	108	85	95	99	111	109	77	96	121	114	123	92	119	87	119	92	105	95	92	95	89	110	105	94	91	101	103	104	109	108	101	103	101	87
Mycoplasma penetrans HF-2	92	105	104	104	121	96	140	123	122	130	92	86	105	109	96	114	89	105	108	106	120	83	99	143	137	134	111	124	102	126	101	117	100	95	92	94	115	116	101	96	102	106	102	116	115	102	116	114	96
Mycoplasma pneumoniae M129	68	81	72	69	91	71	105	103	104	96	64	62	81	81	66	90	66	70	76	77	90	60	78	101	105	93	79	97	78	97	78	85	75	68	68	69	84	81	73	74	76	79	78	88	85	70	81	82	69
Mycoplasma pulmonis UAB CTIP	72	83	74	73	91	75	116	104	105	104	72	60	79	78	73	87	67	80	84	88	96	61	78	105	107	106	77	97	82	108	69	82	84	79	81	74	86	83	78	81	79	79	78	87	90	78	84	82	79
Mycoplasma synoviae 53	70	74	68	65	84	72	109	98	97	94	65	58	73	69	60	78	67	69	80	81	84	62	78	99	102	96	72	92	68	101	68	80	79	72	71	67	77	83	70	70	70	75	72	84	77	76	77	77	67
Myxococcus xanthus DK 1622	323	404	339	298	410	257	570	461	455	463	271	254	372	322	305	414	309	346	339	357	447	255	372	535	530	496	305	445	343	506	354	367	359	355	341	318	345	383	327	267	384	394	369	368	349	274	351	350	312
Neisseria gonorrhoeae FA 1090	182	232	207	178	254	136	304	262	260	272	156	182	218	240	220	285	212	238	247	261	275	186	233	301	297	298	232	280	233	292	232	236	215	214	211	217	230	236	192	149	224	231	217	228	208	151	206	211	214
Neisseria meningitidis 053442	186	234	214	180	254	136	303	261	259	279	155	185	229	239	222	285	218	241	249	254	273	192	234	311	304	303	228	272	235	301	239	239	221	220	216	221	232	244	200	152	231	236	229	237	214	156	207	208	215
Neorickettsia sennetsu str. Miyayama	107	133	122	106	134	97	171	155	154	150	85	100	121	131	114	148	122	127	130	129	131	100	128	169	166	165	121	134	134	171	143	138	118	113	121	110	124	132	117	92	125	126	129	135	110	93	129	134	108
Nitratiruptor sp. SB155-2	229	326	264	237	332	191	343	284	280	288	208	259	279	278	290	331	296	312	314	287	339	249	297	383	370	385	278	355	301	316	268	278	281	286	280	274	304	314	277	205	264	287	271	320	284	216	258	260	265
Nitrobacter hamburgensis X14	247	328	277	243	353	189	428	352	349	369	197	211	313	282	248	355	256	282	292	309	356	218	306	425	419	393	259	364	291	398	308	303	286	291	290	269	272	293	246	183	318	357	320	293	263	216	271	279	268
Nitrobacter winogradskyi Nb-255	242	306	264	237	320	176	401	335	333	348	182	211	289	262	235	339	247	273	273	289	339	203	293	394	391	374	244	356	272	382	309	281	278	267	270	259	256	271	231	178	295	318	302	279	243	201	255	253	261
Nitrosococcus oceani ATCC 19707	258	346	269	249	358	186	442	355	353	380	207	233	305	300	273	395	278	320	316	317	387	237	325	455	452	437	290	371	318	402	311	294	286	281	275	274	303	319	266	205	306	326	320	303	276	214	275	275	262
Nitrosomonas europaea ATCC 19718	207	272	244	209	311	156	360	316	318	311	178	197	250	259	249	349	254	275	282	276	333	203	272	387	366	376	248	329	268	341	273	264	257	239	248	239	255	257	218	165	261	269	268	248	239	187	227	245	222
Nitrosomonas eutropha C91	211	282	247	216	305	164	374	312	312	321	182	199	259	254	242	335	259	279	279	273	328	207	279	395	377	371	252	330	280	346	277	275	263	248	247	241	257	266	220	170	271	282	272	261	233	191	236	244	228
Nitrosospira multiformis ATCC 25196	226	296	256	221	338	173	410	334	329	340	200	207	294	267	239	329	246	284	284	279	344	211	278	404	404	383	264	354	284	372	300	278	267	256	259	249	266	289	241	187	290	299	289	288	264	205	247	260	240
Nocardia farcinica IFM 10152	287	369	336	263	365	211	526	406	403	425	238	249	382	321	269	359	255	304	307	315	381	235	314	465	456	439	300	393	316	491	345	352	310	311	322	291	311	328	284	223	387	409	377	329	297	237	331	321	275
Nocardioides sp. JS614	307	411	342	293	383	230	602	443	438	449	247	247	388	323	282	379	287	319	329	317	388	250	345	476	456	455	309	414	323	498	347	372	348	345	344	319	344	354	309	242	406	438	395	359	332	284	346	353	300
Nostoc sp. PCC 7120	284	392	308	276	418	232	530	427	428	475	242	259	353	355	328	409	325	362	359	350	424	278	379	541	517	508	335	462	376	460	358	343	341	321	338	319	337	378	302	237	344	374	347	363	326	283	310	310	312
Novosphingobium aromaticivorans DSM 12444	238	329	292	225	357	188	452	356	350	368	194	218	333	281	256	333	270	282	293	295	351	231	299	424	403	391	269	345	292	423	301	325	279	272	274	249	282	311	258	185	336	364	337	305	277	205	294	286	245
Oceanobacillus iheyensis HTE831	296	374	329	287	354	231	538	426	422	432	246	241	347	328	279	369	292	331	323	337	387	245	298	458	458	439	293	387	309	461	310	340	351	334	333	314	352	351	318	230	343	384	349	359	339	258	310	317	289
Ochrobactrum anthropi ATCC 49188	295	365	332	281	362	223	537	432	426	448	234	234	370	306	267	372	277	311	316	322	366	234	325	469	472	453	282	380	304	462	331	353	348	338	332	307	331	340	301	235	374	404	376	338	313	264	340	329	290
Oenococcus oeni PSU-1	158	212	191	176	231	147	261	225	224	240	144	145	210	220	170	211	168	191	198	203	226	160	192	268	255	246	193	238	197	225	183	218	183	183	179	178	208	202	191	156	209	224	214	208	190	168	196	194	170
Oligotropha carboxidovorans OM5	266	340	277	250	346	190	451	352	350	387	201	229	329	272	248	345	264	287	295	311	352	229	310	422	406	389	262	367	285	420	314	319	307	299	292	279	280	292	250	199	336	355	326	299	277	214	276	272	272
Onion yellows phytoplasma OY-M	73	73	60	66	79	63	86	83	82	83	66	56	62	74	58	76	64	68	64	70	74	55	68	90	88	89	73	75	74	84	62	73	67	68	68	64	72	76	68	60	63	66	63	72	72	71	75	76	62
Opitutus terrae PB90-1	260	359	310	269	397	210	468	352	353	387	223	224	318	306	267	376	276	313	306	322	396	220	325	465	461	461	283	415	314	391	293	306	294	298	291	275	316	319	290	217	312	327	314	329	308	253	297	297	266
Orientia tsutsugamushi Boryong	88	105	92	85	116	70	130	120	119	121	80	81	96	93	82	111	88	89	96	106	117	83	97	130	123	124	86	118	109	129	95	113	93	92	100	86	94	93	93	82	101	98	105	91	85	81	105	111	86
Parabacteroides distasonis ATCC 8503	211	310	285	239	345	195	379	302	300	302	187	212	262	323	270	363	267	304	313	325	386	218	307	450	462	418	297	391	297	331	268	276	247	255	240	248	300	319	263	198	269	286	272	308	287	211	272	275	245
Paracoccus denitrificans PD1222	306	389	325	286	369	218	548	425	415	445	242	235	363	332	281	379	294	327	323	345	388	244	335	486	471	452	299	401	316	489	335	338	338	333	338	314	319	340	296	223	374	398	367	330	300	253	315	317	301
Parvibaculum lavamentivorans DS-1	266	350	294	244	335	205	459	389	387	392	207	225	329	283	261	354	259	287	289	306	355	228	299	436	417	413	269	364	288	437	311	334	299	295	285	275	295	310	255	205	346	365	339	306	283	220	299	294	263
Pasteurella multocida subsp. multocida str. Pm70	202	275	231	204	293	174	350	294	291	303	178	197	242	266	232	299	239	275	280	279	296	195	251	349	352	332	247	309	260	311	253	254	248	239	241	238	253	278	225	175	244	250	239	285	256	204	221	222	224
Pediococcus pentosaceus ATCC 25745	155	199	184	172	247	153	247	219	215	225	143	143	194	216	169	215	164	198	206	213	246	152	198	263	265	255	193	252	197	228	185	204	180	175	179	172	199	208	186	156	200	210	196	207	182	159	187	188	159
Pelobacter carbinolicus DSM 2380	265	405	302	301	452	230	435	369	364	391	242	264	330	377	366	494	374	428	431	428	492	306	413	603	564	541	345	498	401	403	330	316	333	325	328	323	338	361	307	235	314	336	330	374	338	263	293	304	314
Pelobacter propionicus DSM 2379	267	419	310	300	492	238	449	377	374	375	248	265	345	391	366	478	371	420	416	438	503	301	414	616	587	579	364	538	403	398	326	321	335	329	326	330	375	388	339	242	328	348	339	385	371	265	302	313	320
Pelodictyon luteolum DSM 273	224	338	278	253	374	186	364	322	318	324	210	232	287	315	285	390	297	333	325	325	378	237	333	472	456	450	290	391	331	338	286	276	264	260	258	256	296	323	264	189	276	299	275	314	284	214	260	262	260
Pelodictyon phaeoclathratiforme BU-1	237	352	281	271	377	190	381	324	324	322	220	240	312	322	298	386	300	333	331	341	398	247	338	488	464	457	303	427	338	352	292	274	275	271	276	276	310	332	271	194	293	306	292	324	293	232	269	269	270
Pelotomaculum thermopropionicum SI	280	452	322	318	431	239	429	344	339	364	250	290	351	385	353	417	351	393	404	392	490	322	416	524	529	515	355	499	412	389	320	299	340	339	340	344	362	377	320	228	334	372	345	362	337	263	296	304	327
Petrotoga mobilis SJ95	266	350	300	310	321	256	378	305	304	320	238	237	299	291	275	338	266	302	308	300	353	232	300	401	394	382	260	360	304	330	245	298	294	303	288	291	398	414	365	268	299	319	294	407	362	278	278	272	275
Photobacterium profundum SS9	262	353	306	256	348	227	493	402	400	393	226	228	313	307	287	380	276	329	332	330	360	234	299	451	435	429	280	388	318	434	305	314	302	307	288	283	321	341	293	227	323	354	306	349	318	246	278	280	257
Photorhabdus luminescens subsp. laumondii TTO1	251	320	284	245	351	209	458	370	368	365	224	230	322	298	262	365	270	307	318	318	365	225	301	431	409	400	271	390	299	399	307	314	294	285	286	271	299	315	264	214	326	345	318	319	290	233	284	284	268
Polaromonas naphthalenivorans CJ2	278	383	300	265	388	204	531	398	396	430	227	234	356	307	278	373	272	315	317	328	385	240	332	470	458	468	283	391	326	466	322	336	329	323	324	304	301	320	264	209	365	374	353	315	283	239	316	309	294
Polaromonas sp. JS666	291	391	321	283	393	223	558	417	410	441	242	233	389	314	277	374	288	318	307	334	391	240	330	474	447	448	294	412	313	496	337	359	335	341	335	315	327	334	290	226	382	413	371	323	304	272	340	340	310
Polynucleobacter sp. QLW-P1DMWA-1	226	298	245	221	312	158	383	306	306	345	185	210	290	263	234	308	244	259	261	266	304	206	266	343	335	327	242	313	257	373	276	275	256	256	245	248	244	249	205	161	279	302	286	247	223	182	251	260	236
Porphyromonas gingivalis W83	148	220	169	165	236	145	244	233	230	211	130	142	183	221	192	245	188	216	224	208	248	154	210	290	296	281	211	262	212	223	194	197	173	166	170	173	214	229	195	136	181	187	183	226	223	143	192	200	166
Prochlorococcus marinus str. MIT 9313	200	249	233	202	279	159	347	283	280	316	174	190	250	265	243	299	250	263	267	243	288	195	259	339	339	326	248	298	263	323	274	256	234	234	223	225	232	255	205	168	242	264	257	244	224	176	213	222	216
Propionibacterium acnes KPA171202	222	282	273	224	293	196	400	342	338	334	203	199	274	259	219	296	218	244	261	257	294	196	278	358	364	331	234	314	259	336	261	301	271	268	268	249	270	296	245	200	270	296	282	291	264	213	272	274	237
Pseudoalteromonas atlantica T6c	257	335	307	241	342	199	482	385	379	399	214	212	311	295	261	359	265	301	304	306	359	222	292	431	407	403	271	371	286	419	303	313	277	284	271	270	293	326	269	209	330	343	314	310	295	218	272	282	249
Pseudoalteromonas haloplanktis TAC125	220	309	264	214	321	177	437	364	364	355	197	195	284	277	241	327	240	288	293	293	313	206	268	391	369	359	255	328	264	391	289	274	263	259	247	249	280	285	243	185	282	301	277	286	275	183	255	262	228
Pseudomonas aeruginosa PA7	302	411	342	295	402	228	562	439	432	462	245	251	377	326	297	412	296	340	349	340	406	248	343	534	495	494	298	426	330	499	351	364	348	345	336	319	351	362	308	234	382	418	386	368	339	262	344	342	307
Pseudomonas entomophila L48	275	387	309	264	380	205	537	418	413	443	229	247	341	321	283	383	285	332	338	344	396	242	331	470	456	444	294	416	320	468	331	361	323	326	317	306	331	346	295	224	363	393	361	334	316	253	329	323	289
Pseudomonas fluorescens Pf-5	290	411	333	280	387	219	563	436	431	465	235	248	377	341	299	403	294	342	340	351	409	252	344	506	488	476	314	436	324	485	345	379	337	352	330	324	351	361	320	220	392	422	375	367	329	262	342	347	301
Pseudomonas mendocina ymp	296	388	308	273	379	213	513	417	412	436	236	239	343	322	285	392	275	332	337	339	395	235	326	473	459	446	293	407	323	477	327	342	319	329	327	307	327	350	297	229	352	382	361	348	314	249	321	319	282
Pseudomonas putida F1	284	399	330	275	393	214	547	417	411	459	236	251	379	323	287	390	292	332	327	344	406	245	335	491	474	464	299	421	320	487	332	370	334	323	319	312	335	356	294	225	375	421	372	355	314	254	339	346	301
Pseudomonas stutzeri A1501	285	389	292	270	377	208	507	394	388	432	228	227	328	313	280	387	288	337	332	339	394	244	334	480	448	456	291	409	321	461	302	321	321	331	314	291	317	339	289	227	356	370	342	334	311	235	297	300	283
Pseudomonas syringae pv. syringae B728a	271	382	321	269	368	221	532	408	404	436	234	239	351	329	289	392	286	340	344	337	393	251	336	489	464	459	305	417	321	451	321	355	319	333	318	306	331	344	293	215	373	403	373	342	319	252	325	323	294
Psychrobacter arcticus 273-4	197	262	223	194	278	151	344	288	290	302	167	190	253	255	212	289	224	266	251	255	278	185	249	334	322	311	239	297	243	339	246	251	238	230	227	226	236	253	197	156	262	268	256	250	221	159	231	243	214
Psychrobacter cryohalolentis K5	215	288	244	216	299	168	405	320	319	351	178	196	279	279	222	311	234	273	268	269	300	193	260	363	350	356	253	312	263	375	262	276	263	252	247	239	258	276	218	167	282	301	276	267	240	178	252	264	236
Psychrobacter sp. PRwf-1	215	290	244	206	298	159	390	325	323	324	177	201	270	267	229	302	228	273	280	279	304	203	254	371	353	344	244	309	258	377	261	270	254	254	246	245	263	281	230	171	284	287	267	264	229	178	259	255	234
Psychromonas ingrahamii 37	258	319	289	258	340	205	463	368	362	405	219	220	303	302	265	376	280	329	319	316	359	227	294	447	432	412	296	390	294	413	291	307	296	301	294	271	319	335	289	237	302	325	314	329	304	221	265	261	256
Ralstonia eutropha H16	313	439	355	318	422	227	582	441	436	472	271	265	432	325	285	404	296	339	336	349	418	265	354	515	495	502	311	445	331	514	358	378	364	362	362	339	367	373	322	242	421	463	428	385	341	274	361	361	320
Ralstonia metallidurans CH34	304	418	332	290	402	217	569	421	414	464	253	257	409	326	281	377	290	327	326	340	393	254	340	493	474	480	299	422	327	478	335	365	352	361	348	329	358	360	318	228	392	430	385	359	332	270	344	345	308
Ralstonia pickettii 12J	277	390	328	283	383	211	530	396	395	439	246	243	375	300	274	368	282	312	311	328	383	243	333	452	443	442	283	399	315	463	322	352	341	336	333	317	338	352	297	223	377	413	368	350	326	256	325	322	296
Ralstonia solanacearum GMI1000	287	366	324	286	381	214	526	404	400	428	246	247	375	297	271	367	274	312	310	328	384	237	323	452	436	428	277	399	300	460	324	340	338	333	329	316	331	342	291	220	376	406	383	339	305	261	326	327	293
Renibacterium salmoninarum ATCC 33209	228	279	275	233	307	177	417	337	335	338	185	202	275	259	220	290	220	251	261	261	294	194	247	361	338	325	235	306	256	354	278	294	262	260	256	245	257	274	231	181	301	318	302	270	241	207	277	270	235
Rhizobium etli CFN 42	301	380	362	267	394	218	560	418	411	450	235	233	364	320	268	381	264	317	316	330	419	241	334	508	477	472	287	414	319	454	331	366	341	333	338	303	332	348	303	239	367	415	378	330	318	261	352	335	293
Rhizobium leguminosarum bv. viciae 3841	315	385	371	282	424	231	592	433	425	467	248	239	393	318	277	407	279	327	329	355	414	244	342	546	511	495	302	443	327	489	342	385	351	349	339	312	344	357	315	253	397	440	394	345	318	292	353	347	306
Rhodobacter sphaeroides ATCC 17029	291	372	305	279	365	217	514	407	404	437	227	230	350	309	273	379	283	326	330	326	373	240	313	482	464	447	293	385	314	451	322	340	327	325	321	304	315	342	286	226	351	372	357	325	300	237	301	296	302
Rhodococcus sp. RHA1	315	415	373	304	397	230	620	460	454	472	255	259	429	355	294	388	291	333	338	337	407	260	347	528	502	494	327	424	344	524	367	396	349	355	343	327	354	374	317	251	432	477	431	372	338	286	379	373	306
Rhodoferax ferrireducens T118	296	417	317	304	404	224	561	411	411	429	252	255	369	314	294	386	297	349	328	339	404	255	339	501	478	465	308	420	335	490	326	346	339	351	341	323	353	366	313	233	369	397	365	356	339	286	313	321	317
Rhodopirellula baltica SH 1	230	320	287	240	345	194	466	362	358	373	209	219	293	284	266	356	272	296	298	303	363	256	307	458	445	428	273	357	304	404	319	283	274	275	274	259	299	313	262	206	305	319	304	301	270	224	259	266	250
Rhodopseudomonas palustris BisA53	277	393	307	264	425	212	519	391	387	434	222	239	370	319	286	400	310	338	342	349	411	258	349	507	478	458	297	428	337	480	336	347	333	313	321	298	318	332	281	216	363	401	367	335	312	242	300	309	300
Rhodospirillum rubrum ATCC 11170	300	390	307	294	392	240	517	413	408	430	239	257	366	325	299	402	305	335	348	340	386	263	341	511	497	477	300	422	343	453	318	352	337	349	340	325	334	358	309	236	355	381	354	347	328	262	324	327	321
Rickettsia akari str. Hartford	112	133	114	101	136	84	158	148	147	140	94	97	120	121	99	133	106	118	124	122	141	91	124	153	152	155	112	135	132	154	128	134	116	110	118	109	118	115	113	85	119	126	127	119	110	100	132	130	100
Rickettsia bellii RML369-C	114	144	119	114	154	84	168	153	153	144	98	101	136	133	113	149	107	128	126	143	163	99	134	170	168	174	126	154	138	161	141	140	118	112	125	111	128	125	122	92	132	136	131	131	119	106	133	134	109
Rickettsia canadensis str. McKiel	111	130	110	104	133	78	153	142	141	139	97	95	121	128	105	134	104	114	121	123	140	96	122	157	154	156	113	135	126	152	122	132	114	108	115	104	118	117	113	82	119	133	124	121	119	99	122	126	98
Rickettsia conorii str. Malish 7	115	133	115	111	144	87	160	150	148	140	99	97	124	128	105	137	109	124	126	136	151	101	127	158	155	156	114	140	136	156	129	135	119	113	121	109	125	117	118	87	121	128	130	131	122	103	132	134	105
Rickettsia felis URRWXCal2	116	142	120	114	146	92	163	154	154	151	98	101	134	132	114	152	113	129	133	138	162	103	133	177	168	177	121	151	139	162	135	143	123	118	125	118	130	127	123	92	131	135	136	135	127	109	137	133	102
Rickettsia massiliae MTU5	111	133	112	106	142	88	156	145	145	148	94	96	126	128	109	135	109	127	126	133	154	99	129	158	152	159	119	144	139	153	132	133	120	112	119	111	122	117	112	85	121	131	127	128	119	101	130	138	101
Rickettsia prowazekii str. Madrid E	110	134	114	100	136	84	156	145	144	135	95	91	124	125	98	129	105	116	122	124	137	96	125	153	151	156	113	129	128	152	126	136	113	111	118	106	116	117	113	81	120	125	127	122	115	97	124	124	101
Rickettsia rickettsii str. Iowa	111	131	107	105	145	85	155	148	147	141	92	94	120	124	103	137	104	123	124	134	148	99	125	155	150	157	113	139	131	151	131	132	117	110	119	109	121	116	112	84	116	123	124	125	118	98	130	132	99
Rickettsia typhi str. Wilmington	107	133	117	105	141	87	152	148	145	135	92	92	118	127	100	132	107	117	126	129	142	98	123	158	153	151	111	132	129	151	126	129	118	114	117	112	118	116	117	84	115	123	122	121	114	98	123	127	103
Roseiflexus castenholzii DSM 13941	368	464	395	367	438	270	610	462	457	514	300	287	431	374	334	448	331	366	372	371	464	286	385	558	545	530	341	485	409	517	382	398	412	402	402	390	416	427	395	300	426	468	422	429	400	336	379	372	372
Roseiflexus sp. RS-1	374	469	393	366	450	277	612	477	468	518	298	293	423	379	342	459	332	377	372	374	476	294	392	574	547	534	353	502	407	520	392	399	415	414	412	391	420	435	395	302	431	456	423	439	398	337	372	376	375
Roseobacter denitrificans OCh 114	297	365	309	269	353	209	542	394	392	444	228	222	346	304	269	382	265	317	313	312	362	239	314	452	424	427	266	364	305	461	321	343	323	324	322	291	307	323	276	226	363	380	361	316	284	241	294	295	290
Rubrobacter xylanophilus DSM 9941	365	446	378	329	396	261	619	467	464	507	287	273	438	353	308	387	300	352	346	342	430	294	396	474	479	453	320	403	375	542	363	410	395	386	382	346	378	414	352	282	434	488	433	384	359	293	372	372	340
Saccharophagus degradans 2-40	221	301	263	223	335	178	421	338	334	358	184	210	279	274	242	352	240	283	293	289	331	217	284	411	393	383	253	367	272	384	282	277	261	252	254	250	261	280	225	188	278	301	283	276	251	200	247	256	236
Saccharopolyspora erythraea NRRL 2338	328	422	396	304	406	243	619	469	461	476	260	265	436	351	290	388	286	342	335	336	410	267	334	525	510	471	316	412	350	520	367	399	359	355	356	331	354	385	325	253	432	470	427	374	346	286	358	358	308
Salinibacter ruber DSM 13855	259	325	299	242	317	204	535	440	437	456	219	219	301	269	248	358	256	277	273	282	354	225	311	427	417	406	254	351	299	488	309	299	302	283	281	271	313	328	275	209	313	334	314	319	287	222	274	293	263
Salinispora arenicola CNS-205	291	385	341	279	364	219	536	434	432	432	244	242	370	326	277	356	283	304	320	312	388	243	327	472	455	448	288	402	326	464	359	352	327	330	328	309	330	345	295	233	378	414	375	330	304	253	337	326	290
Salinispora tropica CNB-440	279	376	340	280	353	215	525	424	421	431	245	235	354	325	269	342	274	304	315	314	375	241	325	460	461	432	291	378	322	461	358	344	320	319	323	295	322	340	299	220	368	395	347	344	301	249	335	324	280
Salmonella enterica subsp. enterica serovar Typhi str. Ty2	269	371	342	291	393	226	498	401	396	401	247	255	362	331	307	396	317	358	367	346	403	250	338	490	466	472	321	420	329	430	328	348	340	341	334	320	357	379	318	237	357	379	360	378	343	268	335	334	304
Salmonella typhimurium LT2	280	372	352	296	398	238	505	407	401	406	254	258	371	344	312	409	320	362	375	349	404	253	346	506	482	486	322	432	336	433	330	357	349	346	339	332	359	383	316	244	360	394	367	380	341	277	342	345	307
Serratia proteamaculans 568	286	364	330	279	385	232	537	423	416	430	244	256	366	321	292	397	299	343	356	349	392	245	343	499	484	466	301	420	321	451	334	343	327	333	320	319	361	372	322	254	374	402	363	381	330	292	325	330	299
Shewanella amazonensis SB2B	243	322	282	240	343	203	436	355	350	359	225	224	311	290	262	347	264	308	308	307	348	229	286	411	393	384	263	365	293	400	281	297	279	291	266	271	299	313	262	202	308	316	305	311	288	211	265	269	255
Shewanella baltica OS155	233	332	275	243	350	194	438	370	367	361	221	219	304	291	260	350	262	318	313	306	363	215	279	431	416	408	262	380	292	394	281	310	267	284	270	258	282	302	253	193	295	315	293	305	283	208	257	266	255
Shewanella denitrificans OS217	227	302	258	226	325	187	415	345	342	337	200	202	283	271	245	339	248	285	283	294	330	212	271	400	381	365	237	340	266	371	274	285	264	259	255	256	269	282	232	190	282	286	273	281	263	195	254	258	232
Shewanella frigidimarina NCIMB 400	234	341	272	241	343	199	464	362	362	371	216	229	312	298	268	354	276	315	312	319	341	225	287	434	414	409	265	368	300	429	275	300	278	277	271	266	289	309	265	199	305	322	300	305	286	207	265	274	256
Shewanella halifaxensis HAW-EB4	262	358	294	275	361	217	473	374	373	372	241	240	329	318	286	372	287	330	325	329	366	241	306	455	429	427	287	392	317	423	302	315	302	308	294	296	309	322	281	231	321	341	325	341	314	245	275	292	273
Shewanella loihica PV-4	249	355	275	250	343	199	457	364	358	367	224	235	309	304	263	352	278	317	313	316	360	223	289	441	412	404	275	393	299	413	292	304	287	287	276	278	297	308	269	214	308	317	300	311	288	219	263	273	263
Shewanella oneidensis MR-1	246	325	286	258	350	195	436	363	360	360	232	218	313	298	267	358	271	324	313	311	354	221	294	428	414	410	266	381	303	390	289	308	274	287	273	277	291	312	259	208	300	327	295	308	279	225	259	268	265
Shewanella pealeana ATCC 700345	248	361	291	264	362	212	458	363	361	367	240	233	318	310	278	371	284	328	323	331	367	238	310	445	418	429	277	390	312	417	292	313	293	303	284	288	308	324	276	217	324	334	311	332	303	241	271	290	269
Shewanella putrefaciens CN-32	239	327	271	239	353	190	439	360	354	358	219	216	308	295	262	351	269	319	314	315	356	220	290	420	408	417	266	367	298	373	283	308	273	285	269	269	283	295	248	193	302	310	292	299	268	205	261	270	259
Shewanella sediminis HAW-EB3	259	382	300	276	376	210	479	381	375	400	250	251	327	328	294	397	301	347	343	337	377	251	313	480	446	454	305	409	320	430	302	312	312	305	302	297	323	338	296	221	331	342	325	337	325	244	291	291	287
Shewanella sp. ANA-3	244	337	282	249	354	197	451	365	361	371	234	215	316	300	261	357	269	321	311	326	356	221	292	439	420	425	271	395	301	399	283	307	280	284	275	269	291	311	260	202	308	327	300	313	280	209	260	270	260
Shewanella sp. MR-4	244	332	281	249	341	190	444	355	351	364	232	219	315	291	255	347	268	310	305	317	353	222	287	425	411	410	265	381	294	397	272	302	285	289	273	275	289	306	259	201	305	326	298	306	279	214	261	266	264
Shewanella sp. MR-7	240	331	283	244	342	189	444	354	350	361	229	216	312	294	259	349	267	313	304	316	351	223	285	425	412	412	268	381	291	399	275	305	280	288	274	270	285	300	254	199	304	321	295	304	281	209	260	262	261
Shewanella sp. W3-18-1	236	326	271	239	356	189	443	361	357	362	219	218	308	298	258	348	269	326	316	313	353	220	289	427	414	419	267	369	297	384	279	304	275	286	267	272	283	296	250	192	304	309	294	301	272	202	258	268	259
Shigella boydii Sb227	265	349	326	279	367	218	475	385	379	409	247	255	335	302	291	372	293	329	338	323	380	244	322	453	446	443	294	397	309	420	317	332	324	328	319	308	331	351	298	238	336	351	318	357	324	262	299	295	291
Shigella dysenteriae Sd197	261	336	299	272	358	210	455	374	368	395	234	250	324	295	281	364	289	323	331	317	365	243	320	443	440	427	287	386	304	405	308	316	306	305	301	293	328	347	291	227	325	347	313	354	313	248	301	297	286
Shigella flexneri 2a str. 2457T	274	360	315	279	365	213	482	384	377	401	250	251	335	301	290	373	292	329	336	331	378	248	326	456	447	434	294	391	306	416	314	342	325	330	323	312	335	348	293	231	332	359	326	358	326	264	309	306	303
Shigella sonnei Ss046	277	358	328	285	377	223	496	394	389	413	250	255	350	307	291	372	288	329	343	329	382	245	325	465	455	449	291	406	313	427	323	349	333	336	333	327	345	361	307	239	348	374	338	367	324	273	314	313	299
Silicibacter pomeroyi DSS-3	292	366	297	277	339	212	529	389	388	434	233	234	347	296	256	359	251	302	305	303	344	236	303	433	408	407	270	363	301	450	320	326	330	320	322	287	296	318	262	218	355	376	352	308	283	228	290	285	286
Silicibacter sp. TM1040	285	358	296	257	338	207	514	413	404	445	222	227	341	295	257	375	266	317	309	300	337	236	306	433	413	414	276	361	300	455	320	325	309	306	299	279	308	322	283	224	351	370	360	320	289	245	294	291	272
Sinorhizobium medicae WSM419	316	385	359	298	399	253	566	430	423	464	243	240	365	330	287	405	286	338	333	341	408	248	335	536	522	501	290	414	329	471	347	371	359	351	341	320	342	361	306	248	382	414	395	361	326	282	345	339	310
Sinorhizobium meliloti 1021	320	393	352	296	397	246	572	443	437	474	237	234	376	333	288	419	292	340	334	345	407	251	337	537	533	504	299	420	331	480	350	378	358	346	345	322	342	354	308	249	390	424	399	352	328	284	346	341	308
Sodalis glossinidius str. 'morsitans'	200	256	236	203	277	166	329	277	277	283	186	191	237	246	211	284	225	251	252	244	281	189	250	323	321	313	234	281	239	295	246	247	237	233	233	235	244	258	215	164	236	247	237	258	229	184	218	224	218
Solibacter usitatus Ellin6076	326	447	408	351	456	269	568	440	431	427	272	277	425	355	299	419	313	344	339	363	453	286	379	529	519	491	325	463	374	465	372	392	391	386	380	359	387	399	354	287	428	457	423	394	364	293	386	365	342
Sorangium cellulosum 'So ce 56'	305	413	361	313	436	259	589	455	448	469	270	252	390	336	312	414	314	342	342	361	441	267	367	550	526	520	320	463	356	496	364	402	365	360	359	332	366	390	338	266	405	423	398	379	348	289	361	357	312
Sphingomonas wittichii RW1	254	348	307	248	349	198	462	362	363	368	211	219	343	292	255	355	251	285	291	306	360	224	291	432	413	409	270	361	298	422	307	322	290	287	287	263	277	299	254	196	355	377	342	290	268	207	307	317	263
Sphingopyxis alaskensis RB2256	231	316	270	226	323	177	435	347	344	347	196	217	294	263	254	314	242	273	280	286	335	216	262	392	369	366	255	338	268	412	299	307	271	265	257	235	261	282	236	180	299	327	303	285	255	211	277	276	230
Staphylococcus aureus RF122	252	299	284	246	327	205	412	351	351	347	208	217	308	299	267	329	255	295	307	307	343	225	275	384	382	370	269	340	275	388	287	304	281	279	268	263	291	318	258	202	297	317	305	302	275	222	289	284	247
Staphylococcus epidermidis RP62A	235	303	269	241	314	195	408	347	345	356	196	220	292	292	267	315	266	292	301	292	333	224	271	383	384	371	271	337	268	381	286	292	273	262	253	251	289	307	262	200	288	307	295	296	266	208	271	274	241
Staphylococcus haemolyticus JCSC1435	237	298	275	232	312	191	412	351	348	356	200	212	292	279	250	315	242	277	289	288	338	216	266	372	376	359	254	337	268	377	287	295	268	258	249	250	296	302	252	204	292	311	292	284	262	209	282	274	235
Staphylococcus saprophyticus subsp. saprophyticus ATCC 15305	243	314	283	243	336	197	442	361	355	385	193	221	303	314	265	323	260	308	320	312	349	231	286	407	394	383	279	346	278	392	291	307	271	272	258	258	306	319	265	205	302	324	300	308	275	214	294	292	247
Streptococcus agalactiae 2603V/R	181	218	198	186	230	164	291	264	257	267	156	163	212	242	185	258	188	225	216	231	249	153	217	313	304	275	209	251	205	253	200	207	205	202	200	202	225	235	200	156	207	227	213	234	225	181	198	194	182
Streptococcus gordonii str. Challis substr. CH1	196	247	223	201	261	168	315	261	257	275	160	181	225	260	222	274	214	247	250	266	284	190	241	327	321	310	236	284	233	281	219	239	219	232	223	220	245	261	217	165	219	246	230	254	232	188	209	203	204
Streptococcus mutans UA159	195	251	224	205	273	168	302	258	255	281	165	183	229	257	220	279	211	256	250	263	288	184	251	338	329	313	242	308	241	267	233	231	228	229	223	220	249	252	217	160	218	237	231	251	230	183	202	203	208
Streptococcus pneumoniae D39	192	234	206	196	250	164	304	265	261	275	158	163	211	258	210	255	200	234	241	251	272	177	225	292	289	284	226	270	216	275	213	222	219	216	216	217	249	261	219	169	220	233	212	248	234	200	203	203	205
Streptococcus pyogenes M1 GAS	172	201	183	173	213	168	265	244	242	227	156	140	189	217	167	219	177	208	208	217	234	147	190	268	256	242	207	239	201	239	178	200	189	192	189	182	209	212	185	160	202	208	197	228	205	172	189	196	167
Streptococcus sanguinis SK36	205	265	231	210	294	171	341	288	281	300	170	190	245	284	245	297	237	266	267	280	304	199	263	359	341	334	258	311	257	311	238	253	241	233	236	221	252	276	232	168	248	266	250	265	244	193	229	234	224
Streptococcus suis 05ZYH33	172	213	195	184	228	158	286	240	240	251	149	157	197	225	187	246	181	229	223	234	249	154	199	294	292	273	203	260	202	247	184	202	190	199	183	193	218	231	195	156	200	223	205	228	206	171	186	176	183
Streptococcus suis 98HAH33	177	224	201	193	235	162	297	248	250	264	156	164	199	235	196	253	188	234	229	232	259	159	212	308	300	277	208	266	205	253	193	210	201	208	189	197	224	237	199	159	201	225	210	232	214	179	192	183	191
Streptococcus thermophilus CNRZ1066	176	241	193	201	263	158	298	248	244	262	152	170	214	247	209	264	207	236	236	249	269	182	233	303	306	292	223	271	223	263	209	208	202	213	201	205	230	240	200	149	205	218	219	228	215	163	186	189	196
Streptomyces avermitilis MA-4680	314	403	375	293	392	234	593	456	451	470	259	261	404	339	282	374	282	326	315	321	393	255	325	490	476	458	308	407	336	497	357	387	360	363	355	340	344	366	323	264	414	457	409	356	327	286	367	358	310
Streptomyces coelicolor A3(2)	326	403	380	296	395	237	602	454	448	482	263	258	407	346	292	390	283	329	327	328	408	245	350	518	492	473	309	421	335	490	370	382	346	354	354	327	347	376	314	253	416	463	409	366	350	289	363	365	303
Sulfurihydrogenibium sp. YO3AOP1	255	356	307	272	348	220	361	292	293	309	235	282	302	313	321	356	319	336	325	302	363	265	327	403	406	402	293	371	338	349	302	286	324	316	311	308	318	344	296	219	296	327	313	334	293	245	283	299	304
Sulfurimonas denitrificans DSM 1251	186	285	239	217	312	167	326	264	264	271	187	222	244	281	273	320	280	309	312	288	320	222	277	378	370	349	257	335	273	294	271	234	249	240	239	247	269	277	235	175	241	263	254	269	239	189	229	223	241
Sulfurovum sp. NBC37-1	217	309	270	236	342	187	350	297	293	296	202	241	277	294	284	332	301	318	318	299	337	242	301	410	404	391	277	367	302	325	268	272	261	256	259	260	291	297	254	189	259	280	275	301	271	216	252	254	248
Symbiobacterium thermophilum IAM 14863	326	395	330	300	358	245	499	426	420	421	258	264	345	334	302	401	295	336	349	323	390	248	326	482	455	442	289	402	328	458	321	361	351	355	349	337	374	370	327	251	343	373	342	383	347	302	338	332	321
Synechococcus elongatus PCC 6301	226	319	265	242	361	185	412	340	337	379	210	226	289	297	281	355	286	312	308	293	355	245	333	417	415	401	285	375	321	384	300	294	296	282	277	275	276	304	252	192	297	306	300	293	267	207	270	267	264
Synechococcus sp. CC9311	212	265	250	218	293	171	370	318	315	340	188	198	276	265	251	309	253	272	279	251	299	211	274	345	344	349	245	319	272	356	283	260	255	240	248	242	243	275	217	170	260	287	277	256	239	188	236	234	232
Synechococcus sp. CC9605	210	267	243	215	299	168	373	316	314	347	191	202	267	273	255	311	256	277	281	254	312	221	286	336	343	331	258	323	278	353	282	263	256	249	247	245	248	273	224	172	264	291	277	261	243	189	233	231	231
Synechococcus sp. CC9902	210	262	236	210	296	160	356	307	308	332	183	204	265	264	246	311	255	270	271	255	300	215	271	338	335	331	256	308	276	342	280	261	252	238	235	235	253	274	218	167	264	293	265	260	242	189	224	230	224
Synechococcus sp. JA-2-3B'a(2-13)	263	329	281	251	338	194	438	366	361	411	219	229	308	291	285	342	279	297	310	291	350	240	332	413	406	401	282	364	321	412	298	282	311	307	300	290	274	308	253	205	298	321	317	303	270	218	272	269	278
Synechococcus sp. JA-3-3Ab	253	325	279	243	329	188	420	360	358	393	221	222	294	287	278	341	281	304	302	287	357	237	320	394	393	385	271	357	314	393	300	283	305	293	294	287	274	307	247	200	292	319	305	290	264	214	262	263	273
Synechococcus sp. RCC307	212	271	252	213	307	166	373	313	311	350	188	201	268	266	249	309	261	274	282	262	311	215	275	345	347	349	254	312	280	348	279	273	259	251	250	248	250	281	230	172	273	285	274	263	240	189	236	247	239
Synechococcus sp. WH 7803	201	273	260	221	302	162	377	311	310	338	182	201	274	274	244	308	254	281	280	261	313	216	284	353	351	353	247	324	287	341	277	267	254	242	249	239	251	274	230	173	274	294	283	259	241	193	240	240	229
Synechococcus sp. WH 8102	214	266	244	215	291	168	373	309	306	339	185	199	267	261	254	317	258	275	270	257	305	219	282	342	344	341	252	316	277	345	279	257	257	247	242	234	249	274	222	181	263	282	274	256	235	182	227	231	232
Synechocystis sp. PCC 6803	238	344	289	259	374	196	456	357	358	401	216	234	304	321	293	357	298	328	328	318	378	241	332	441	429	428	311	408	334	411	321	317	293	285	284	275	293	318	258	206	299	320	313	313	284	223	282	281	259
Syntrophobacter fumaroxidans MPOB	327	532	375	361	527	265	500	406	404	449	286	308	386	411	396	492	404	439	436	446	552	342	471	622	613	592	369	586	439	457	342	358	403	401	401	389	400	427	376	275	377	408	383	425	410	307	346	348	384
Syntrophomonas wolfei subsp. wolfei str. Goettingen	245	366	260	277	392	216	349	284	283	287	223	239	280	340	297	395	305	341	337	360	430	263	354	460	443	462	312	456	357	318	259	257	283	276	271	279	319	318	295	230	277	287	291	330	315	236	253	248	262
Syntrophus aciditrophicus SB	259	440	304	329	450	243	396	326	323	344	239	274	312	358	348	450	350	387	393	410	505	299	419	529	533	514	344	522	391	368	292	283	318	325	315	319	345	362	317	250	304	335	313	373	343	268	275	291	314
Thermoanaerobacter pseudethanolicus ATCC 33223	276	389	316	301	381	253	406	339	335	352	248	254	330	362	315	396	317	363	355	350	399	262	367	464	447	437	333	402	347	359	278	319	311	309	308	291	400	425	366	279	315	356	325	410	376	286	307	296	286
Thermoanaerobacter sp. X514	277	403	317	304	392	256	411	346	345	360	256	259	346	375	336	416	328	380	374	375	418	276	371	479	472	457	347	424	366	367	292	333	328	313	325	305	395	426	362	286	328	369	338	411	375	287	320	310	301
Thermoanaerobacter tengcongensis MB4	277	402	331	317	397	269	410	343	342	339	252	252	341	356	320	395	307	349	354	350	408	284	356	476	474	454	322	426	351	353	279	336	325	321	330	307	408	432	378	275	316	358	324	434	387	304	318	313	292
Thermobifida fusca YX	271	344	320	258	329	221	486	389	383	423	227	245	341	293	254	354	263	281	284	290	351	230	300	434	408	396	274	369	299	447	317	333	316	314	312	289	291	324	269	220	344	375	359	323	279	253	305	294	277
Thermodesulfovibrio yellowstonii DSM 11347	267	475	315	308	431	245	372	318	316	319	264	297	323	351	379	423	377	383	384	368	436	302	405	503	498	489	335	459	392	364	307	300	350	346	340	351	372	393	341	266	324	334	331	387	365	287	298	316	338
Thermosipho africanus TCF52B	265	346	268	282	318	266	353	311	307	292	259	213	269	283	287	326	274	299	306	283	337	229	290	386	382	364	261	343	296	306	246	273	291	279	280	269	387	398	369	285	284	296	290	395	378	286	273	273	273
Thermosipho melanesiensis BI429	267	350	263	278	316	267	344	314	312	280	251	212	273	293	294	327	276	312	309	289	335	236	285	395	377	372	270	351	301	310	244	282	287	289	289	272	386	379	372	286	279	293	281	392	389	281	274	283	280
Thermosynechococcus elongatus BP-1	230	307	265	229	344	176	389	326	328	364	191	216	285	290	272	354	282	300	312	281	346	238	322	413	412	400	285	357	313	367	301	281	266	266	262	263	274	291	244	177	277	294	287	283	262	212	258	263	247
Thermotoga lettingae TMO	293	366	303	342	321	292	373	318	316	315	278	240	294	278	281	325	265	298	313	307	356	235	306	402	399	385	261	355	295	335	240	284	302	299	293	293	401	401	392	304	306	319	299	410	383	316	289	277	281
Thermotoga maritima MSB8	292	389	323	332	345	272	394	327	327	332	275	268	310	314	315	366	301	328	344	311	375	271	339	436	433	406	290	382	333	347	252	290	335	327	323	324	413	450	397	297	313	334	317	424	389	308	297	290	311
Thermotoga petrophila RKU-1	285	378	323	331	335	275	380	317	315	326	279	264	308	311	304	360	292	317	331	300	368	261	322	434	428	394	283	369	336	341	250	289	330	322	321	324	399	435	379	290	308	327	308	412	370	303	290	286	310
Thermotoga sp. RQ2	295	390	330	338	344	275	390	326	324	330	281	268	319	318	321	374	308	333	343	318	380	274	342	443	440	417	296	392	346	343	255	295	337	326	327	329	422	447	400	301	319	338	318	430	391	305	296	295	320
Thermus thermophilus HB27	355	394	337	307	356	242	512	405	405	406	274	283	383	300	301	345	287	319	320	314	369	255	333	435	414	416	276	389	319	477	330	363	410	389	389	347	373	396	339	262	397	419	391	383	339	278	342	345	343
Thiobacillus denitrificans ATCC 25259	226	344	266	248	360	183	416	331	330	349	216	222	293	287	267	369	269	309	310	308	386	239	331	438	422	420	271	365	304	389	287	276	290	283	291	272	289	307	268	186	294	309	297	305	280	219	250	259	263
Thiomicrospira crunogena XCL-2	208	288	234	202	314	175	365	329	323	339	180	216	258	272	258	352	272	307	313	298	319	231	275	399	389	386	258	346	281	360	271	247	244	236	237	234	264	280	239	177	249	269	263	282	260	180	226	234	230
Treponema denticola ATCC 35405	184	230	190	193	258	193	254	236	234	227	163	148	202	220	207	246	193	219	225	243	263	159	210	317	301	297	200	305	205	236	200	196	189	184	191	182	241	237	213	181	200	208	199	249	248	184	197	201	176
Treponema pallidum subsp. pallidum str. Nichols	89	117	86	90	129	95	135	132	130	127	94	75	90	115	97	137	98	116	121	109	145	76	112	146	149	151	100	138	116	125	102	92	95	92	97	91	119	113	111	97	86	95	90	128	129	98	98	101	86
Trichodesmium erythraeum IMS101	260	342	285	252	357	200	458	372	370	426	227	236	311	318	291	364	297	326	320	300	364	236	329	430	430	420	300	373	327	421	329	304	302	291	303	284	304	328	270	214	314	334	320	303	283	225	284	281	275
Tropheryma whipplei TW08/27	134	147	133	128	167	111	187	173	175	168	107	127	152	148	130	155	132	135	139	148	161	115	149	179	180	175	149	175	145	167	151	159	143	143	139	136	151	155	142	107	149	160	148	150	143	117	146	156	130
Ureaplasma parvum serovar 3 str. ATCC 700970	68	81	68	63	94	69	102	95	96	96	68	62	70	80	67	86	69	77	82	88	95	60	79	95	94	95	81	99	75	100	72	75	69	71	66	70	78	77	69	73	63	66	65	79	79	69	73	69	72
Verminephrobacter eiseniae EF01-2	275	351	299	259	330	202	481	363	359	399	211	213	342	269	240	345	229	285	278	291	322	222	286	402	392	388	263	351	279	421	285	328	318	313	311	298	302	307	267	208	363	376	352	287	270	242	300	284	274
Vibrio cholerae O395	233	333	273	241	333	203	448	374	371	369	212	222	288	295	268	356	270	326	320	319	345	234	297	427	418	399	278	359	300	401	291	292	272	280	277	269	307	323	266	211	303	315	295	324	297	228	276	268	251
Vibrio fischeri ES114	232	332	277	234	337	196	437	363	360	365	216	219	268	300	270	364	282	324	319	338	358	225	291	429	416	401	281	384	302	390	301	285	267	277	269	273	303	320	272	202	289	300	288	320	299	228	257	246	255
Vibrio harveyi ATCC BAA-1116	257	346	292	262	359	202	487	401	400	390	227	232	300	306	282	370	290	333	326	336	363	241	302	457	437	433	283	381	313	425	314	319	299	296	297	287	333	345	287	229	314	348	311	348	312	239	277	277	262
Vibrio parahaemolyticus RIMD 2210633	261	356	300	269	356	208	488	401	396	398	234	234	304	312	285	384	292	333	324	342	366	245	305	465	451	436	290	389	323	431	312	312	302	297	290	291	330	346	291	225	312	342	311	344	318	250	279	275	269
Vibrio vulnificus CMCP6	242	339	307	252	343	208	485	389	388	382	225	226	302	303	276	370	283	328	321	331	369	232	292	447	419	419	279	376	302	420	291	304	294	291	287	275	316	332	279	223	303	328	299	333	308	228	275	271	260
Wigglesworthia glossinidia endosymbiont of Glossina brevipalpis	103	136	121	105	142	100	159	146	144	144	98	104	118	130	118	141	129	132	133	132	144	108	128	155	158	150	122	143	129	155	142	132	122	120	113	116	121	128	116	93	120	125	120	131	124	86	119	122	116
Wolbachia endosymbiont of Drosophila melanogaster	117	144	133	116	161	99	186	173	173	173	103	114	137	136	130	171	135	133	141	156	157	120	148	195	186	188	133	172	151	187	162	149	130	133	131	123	131	140	127	101	133	148	145	139	121	100	141	146	123
Wolinella succinogenes DSM 1740	208	303	239	217	323	166	338	266	267	296	190	230	246	292	275	327	289	321	322	291	338	229	288	377	366	361	275	350	292	315	265	232	254	253	249	251	278	279	237	174	237	254	234	276	252	191	226	238	249
Xanthobacter autotrophicus Py2	281	383	310	259	390	208	530	409	404	444	224	224	376	321	275	391	286	329	323	339	391	261	338	505	479	476	286	405	321	466	328	339	340	333	330	299	296	325	263	204	370	401	377	312	283	228	318	326	296
Xanthomonas axonopodis pv. citri str. 306	255	322	302	261	357	187	448	370	370	378	216	221	328	286	254	367	252	295	302	306	356	215	304	442	432	408	272	381	291	397	305	322	293	288	283	276	290	316	263	202	328	355	335	327	278	224	286	291	257
Xanthomonas campestris pv. campestris str. 8004	263	316	300	258	353	190	432	373	373	370	209	221	335	278	248	359	242	294	291	296	359	219	294	439	431	403	264	380	285	394	305	326	285	291	288	269	299	304	262	196	331	354	331	321	277	218	287	289	258
Xanthomonas oryzae pv. oryzae KACC10331	229	274	279	234	311	168	392	333	334	340	198	209	295	259	242	342	231	268	270	277	319	203	271	384	376	362	245	341	264	355	279	299	269	265	258	250	268	289	247	183	300	323	298	295	248	200	266	275	243
Xylella fastidiosa 9a5c	191	240	228	188	265	141	305	260	261	281	161	190	235	230	207	272	207	243	240	248	280	187	239	320	322	308	231	292	230	290	241	234	223	217	219	224	225	235	194	142	240	253	238	226	206	163	215	213	205
Yersinia enterocolitica subsp. enterocolitica 8081	271	348	315	260	373	209	491	400	393	416	231	244	347	317	282	372	303	339	342	337	379	243	323	468	455	440	297	396	319	432	324	324	319	318	310	297	335	345	293	226	333	369	343	352	323	265	313	311	286
Yersinia pestis Angola	247	326	298	254	344	204	461	374	371	385	227	237	315	297	255	345	275	307	317	312	354	225	302	446	418	405	273	368	286	397	299	315	304	302	297	286	305	324	274	226	315	346	319	331	293	243	293	290	274
Yersinia pseudotuberculosis IP 32953	252	339	307	254	351	210	477	379	374	394	224	241	319	300	266	356	282	315	322	323	366	227	312	451	426	418	283	379	294	409	313	323	312	307	302	294	319	326	277	231	321	355	325	340	302	253	305	297	283
Zymomonas mobilis subsp. mobilis ZM4	174	236	211	174	273	136	305	257	256	268	144	175	224	228	206	274	203	227	239	235	280	175	219	321	306	305	214	283	225	289	235	228	206	205	200	203	209	218	184	136	224	231	229	226	196	143	207	207	199
Total	104308	140321	118520	105324	144448	84424	180118	146561	145285	152236	89583	93693	128809	124357	110828	145232	112200	127131	127625	128620	149188	96086	126214	178419	173540	168560	115547	154274	124825	161470	121537	125916	120718	119739	118462	114351	125473	132066	112968	87028	129174	137750	129742	130551	119987	95919	116910	117291	109608
[truncated: 10 more columns]

## Sheet: Supplemental_Table3
Supplemental Table 3: Residuals from the upper line calculated from 2 standard deviations from the mean. p values and R2 values indicating that the correlation with genome size no longer exists are also included.
	Halobacterium.sp..NRC.1	Thermococcus.kodakarensis.KOD1	Pyrococcus.horikoshii.OT3	Pyrobaculum.aerophilum.str..IM2	Pyrococcus.furiosus.DSM.3638	Methanothermobacter.thermautotrophicus.str..Delta.H	Methanosarcina.acetivorans.C2A	Methanopyrus.kandleri.AV19	Methanosarcina.mazei.Go1	Archaeoglobus.fulgidus.DSM.4304	Methanocaldococcus.jannaschii.DSM.2661	Methanococcoides.burtonii.DSM.6242	Picrophilus.torridus.DSM.9790	Methanosarcina.barkeri.str..Fusaro	Aeropyrum.pernix.K1	Haloarcula.marismortui.ATCC.43049	Pyrococcus.abyssi.GE5	Sulfolobus.solfataricus.P2	Sulfolobus.tokodaii.str..7	Thermoplasma.acidophilum.DSM.1728	Thermoplasma.volcanium.GSS1	Methanospirillum.hungatei.JF.1	Sulfolobus.acidocaldarius.DSM.639	Methanosphaera.stadtmanae.DSM.3091	Pyrobaculum.arsenaticum.DSM.13514	Natronomonas.pharaonis.DSM.2160	Methanosaeta.thermophila.PT	Methanocella arvoryzae MRE50	Haloquadratum.walsbyi.DSM.16790	Methanoculleus.marisnigri.JR1	Thermofilum.pendens.Hrk.5	Candidatus.Korarchaeum.cryptofilum.OPF8	Pyrobaculum.islandicum.DSM.4184	Caldivirga.maquilingensis.IC.167	Metallosphaera.sedula.DSM.5348	Staphylothermus.marinus.F1	Methanococcus.maripaludis.S2	Methanococcus.vannielii.SB	Methanocorpusculum.labreanum.Z	Pyrobaculum.calidifontis.JCM.11548	Hyperthermus.butylicus.DSM.5456	Methanococcus.aeolicus.Nankai.3	Methanobrevibacter.smithii.ATCC.35061	Nitrosopumilus.maritimus.SCM1	Thermoproteus.neutrophilus.V24Sta	Ignicoccus.hospitalis.KIN4.I	Cand.Methanoregula.boonei.6A8	Halobacterium.salinarum.R1	Desulfurococcus.kamchatkensis.1221n
P value for correlation between residuals and genome size	0.821239	0.559859	0.538737	0.472309	0.430223	0.568332	0.666609	0.453761	0.683218	0.73648	0.616815	0.733611	0.698589	0.612345	0.777393	0.845898	0.472309	0.747651	0.690555	0.701067	0.702769	0.701566	0.740622	0.400352	0.659599	0.821241	0.547808	0.616815	0.79685	0.654916	0.635747	0.496632	0.578703	0.566593	0.678246	0.565411	0.890422	0.869251	0.872037	0.667652	0.726936	0.719394	0.551338	0.671267	0.562568	0.500791	0.600367	0.829882	0.579562
R2 value for correlation between residuals and genome size	0.000114851	0.000764497	0.000849776	0.00116146	0.00139884	0.000731972	0.000417447	0.00126184	0.000374566	0.000254736	0.000563102	0.000260532	0.000337275	0.000577503	0.000179803	8.49765e-05	0.00116146	0.000232854	0.000356483	0.000331473	0.000327522	0.000330312	0.000246496	0.00158989	0.000436374	0.000114849	0.000812402	0.000563102	0.000149074	0.0004493	0.000504591	0.00103911	0.000693428	0.000738571	0.000387117	0.000743078	4.26999e-05	6.09572e-05	5.83648e-05	0.000414673	0.000274302	0.000290337	0.000798163	0.000405146	0.000753995	0.00101919	0.000617229	0.000103845	0.000690297
Synechocystis sp. PCC 6803	-74.1039	-104.637	-106.581	-83.8682	-105.106	-63.2846	-121.461	-64.4587	-103.954	-110.054	-63.6981	-98.2082	-57.7796	-117.884	-83.6631	-88.9436	-108.075	-103.016	-81.799	-69.1459	-70.6991	-83.2989	-94.4517	-46.0406	-88.5673	-76.6316	-70.6079	-99.1356	-57.0033	-93.8641	-81.1482	-76.5065	-81.9687	-74.9237	-91.2303	-72.4689	-78.0775	-75.1979	-81.043	-85.5694	-63.3748	-62.3569	-64.4372	-41.0797	-85.028	-59.3104	-76.6869	-79.1883	-69.5708
Synechococcus sp. WH 7803	-71.1346	-129.872	-109.981	-86.1616	-119.894	-83.4536	-151.842	-72.6345	-126.798	-138.822	-95.2461	-111.952	-66.0856	-142.202	-88.2957	-89.9808	-121.483	-75.9791	-65.2128	-74.208	-75.5206	-126.885	-71.2317	-88.5691	-94.3871	-84.5888	-89.2764	-131.853	-63.0679	-121.105	-85.769	-89.237	-86.8308	-66.5403	-74.9198	-85.4395	-100.736	-100.06	-110.962	-84.1865	-74.6685	-88.3496	-87.4916	-49.0278	-86.2249	-74.3993	-108.409	-73.3697	-85.1806
Wigglesworthia glossinidia	-29.2398	-44.3012	-40.8533	-35.3521	-48.8071	-42.6393	-62.2193	-31.4079	-59.9534	-56.4933	-42.1479	-45.8126	-21.7792	-55.1655	-37.2662	-44.9964	-46.5606	-39.2294	-35.2365	-31.1196	-27.6806	-61.6959	-34.7781	-32.6274	-33.1579	-36.0819	-46.3446	-52.4223	-36.5163	-52.9631	-49.5553	-40.0834	-31.6178	-25.379	-37.6932	-36.9385	-43.0515	-43.9188	-41.8741	-40.8471	-28.1558	-36.613	-32.0959	-8.79968	-29.2826	-28.1521	-45.0628	-28.3149	-23.3292
Syntrophus aciditrophicus SB	-93.173	-36.8764	-40.669	-47.7888	-53.2337	0.854136	-16.3426	-2.27074	-2.63854	-1.44024	-4.60494	4.10764	-78.4792	1.80602	-52.4075	-123.269	-48.129	-70.5267	-66.6615	-64.1789	-49.1103	41.6789	-73.7168	-7.64867	-37.2646	-99.9601	24.3243	7.40141	-95.9254	43.4925	-28.2831	0.591586	-28.8422	-48.3125	-68.39	-22.5436	-13.2156	-4.62677	18.0305	-43.4168	-33.5469	-6.18545	-21.3308	-59.0528	-21.7301	-14.624	10.8985	-93.9144	-17.1955
Shewanella sp. MR-4	-92.3369	-116.495	-110.071	-99.466	-122.041	-107.7	-149.014	-85.9352	-132.184	-130.623	-104.01	-113.895	-82.3884	-146.323	-85.0365	-119.968	-117.183	-110.073	-107.944	-98.9498	-94.1287	-117.153	-100.069	-95.2416	-92.3707	-104.674	-120.571	-114.879	-106.942	-125.397	-95.7129	-91.0987	-88.0793	-91.1146	-90.9937	-81.49	-99.4025	-101.362	-86.3238	-104.335	-52.0609	-94.677	-98.0924	-97.7343	-85.4997	-77.179	-117.295	-92.7191	-79.1808
Shewanella sp. MR-7	-95.8356	-119.511	-116.029	-106.132	-129.075	-111.617	-151.525	-85.4392	-132.394	-133.493	-100.469	-113.064	-81.5579	-147.574	-90.6976	-124.319	-122.267	-118.076	-113.488	-101.96	-100.041	-118.58	-103.724	-92.8937	-95.0886	-105.818	-123.608	-119.988	-112.844	-128.766	-101.957	-97.0759	-94.4028	-90.9404	-96.429	-84.3688	-97.0596	-102.989	-88.2	-105.053	-56.0902	-96.1328	-95.8387	-96.4243	-89.6751	-80.7722	-117.924	-96.2911	-80.9653
Azoarcus sp. BH72	-61.1543	-80.2365	-72.7693	-60.6788	-87.7949	-72.3692	-85.8425	-58.3034	-73.7937	-62.9848	-65.3455	-69.7488	-59.9651	-95.9627	-54.2438	-54.1279	-82.9728	-58.2532	-60.7914	-66.4096	-63.518	-81.1939	-52.9976	-51.7179	-49.6209	-40.9595	-54.3272	-75.4148	-52.0517	-74.3958	-54.6175	-55.811	-56.0432	-80.4424	-54.7634	-70.1297	-56.8833	-67.8206	-68.9638	-50.5848	-30.81	-66.0105	-71.6375	-37.964	-53.3561	-47.612	-60.4822	-67.5896	-61.752
Acinetobacter sp. ADP1	-83.1443	-128.909	-119.338	-100.984	-126.31	-102.947	-147.858	-86.9412	-133.488	-132.231	-112.263	-129.56	-63.4263	-147.195	-85.2291	-103.729	-116.207	-79.9592	-75.2563	-70.6041	-61.4122	-134.611	-68.5257	-79.7956	-97.5343	-70.3015	-115.776	-131.144	-79.667	-141.542	-114.232	-95.1515	-93.327	-79.6675	-80.9022	-99.7973	-108.581	-116.874	-94.7626	-100.618	-82.1326	-116.882	-94.7539	-72.2104	-87.915	-77.4702	-107.553	-83.0044	-94.2473
Synechococcus sp. CC9311	-87.6587	-146.439	-134.268	-101.109	-132.686	-111.225	-185.171	-86.0003	-153.929	-165.32	-97.2379	-127.791	-90.4192	-173.093	-90.8315	-128.498	-142.7	-104.422	-90.2882	-93.3771	-96.5184	-150.831	-104.9	-101.184	-112.452	-95.4793	-113.081	-148.632	-84.8054	-152.696	-101.584	-103.825	-97.6697	-92.4267	-92.0984	-97.2884	-122.06	-112.779	-133.998	-100.808	-78.5703	-98.6864	-108.211	-58.5307	-96.1893	-86.0233	-135.55	-88.1697	-84.3792
Bacillus clausii KSM-K16	-26.0037	-51.3746	-42.8499	-45.5713	-57.9537	-81.3944	-88.6853	-54.864	-87.2925	-90.1053	-77.8525	-91.0518	-22.4511	-85.506	-29.146	-38.1312	-45.1925	-24.7148	-34.7163	-32.7208	-36.7123	-91.7896	-27.0515	-51.4432	-41.5742	-40.5519	-83.488	-78.8003	-43.3699	-73.9295	-45.0392	-57.9112	-45.5409	-8.52641	-45.5558	-29.1271	-72.6068	-70.5104	-49.9385	-46.5413	-27.9798	-72.5121	-40.4678	-39.8873	-56.6829	-41.2745	-83.3193	-28.5253	-28.6409
Prochlorococcus marinus str. MIT 9313	-81.8612	-130.844	-123.662	-91.3371	-124.601	-94.1119	-142.025	-84.3217	-131.817	-145.456	-85.7153	-103.423	-61.7353	-131.404	-77.2045	-93.0952	-127.137	-87.541	-74.5758	-87.8993	-80.2316	-133.643	-86.1764	-75.8756	-87.5402	-79.7478	-100.099	-120.265	-64.1128	-128.328	-92.8432	-96.6903	-87.5801	-79.102	-82.0187	-81.9715	-104.822	-99.7996	-115.211	-95.8364	-73.3686	-81.3694	-83.7724	-37.7775	-86.6287	-76.2283	-113.83	-81.9222	-80.2461
Aromatoleum aromaticum EbN1	-84.1844	-99.5721	-99.9274	-77.8934	-110.244	-78.1487	-84.5642	-60.8892	-67.7962	-81.2635	-71.6392	-78.7535	-69.3923	-105.16	-67.737	-98.3978	-97.7652	-84.8664	-77.5674	-69.0939	-47.543	-83.6228	-77.4372	-70.0596	-72.164	-72.7483	-57.7608	-91.8905	-83.5157	-94.5788	-70.6743	-60.0428	-68.2624	-82.7437	-62.7483	-79.9837	-81.1107	-85.9031	-72.4351	-80.1879	-55.5191	-76.2536	-75.458	-72.3834	-68.7065	-61.6952	-76.2443	-90.0826	-69.0561
Xanthobacter autotrophicus Py2	-63.0525	-119.297	-114.664	-59.9545	-112.053	-88.5619	-91.9587	-51.1825	-86.1988	-96.8566	-87.7435	-79.6921	-66.6023	-98.6489	-64.2293	-77.3439	-119.806	-65.4743	-54.3356	-62.0439	-53.0153	-105.338	-61.6094	-79.7212	-64.4424	-65.8402	-78.5241	-82.0329	-54.9005	-99.221	-93.7211	-89.7916	-76.1506	-79.587	-53.8937	-86.6591	-85.585	-88.3184	-71.5986	-63.5531	-69.6749	-80.3011	-74.3394	-57.6176	-64.0787	-77.2521	-82.8555	-63.2567	-68.4038
Mycobacterium tuberculosis CDC1551	-107.345	-120.288	-110.725	-109.118	-131.885	-105.215	-175	-85.3102	-181.323	-139.835	-105.252	-144.09	-61.5073	-157.571	-76.7181	-130.289	-123.178	-62.6004	-73.1468	-69.6418	-62.5312	-161.067	-73.5901	-85.0203	-108.173	-102.511	-116.419	-148.74	-101.106	-141.161	-94.2111	-106.8	-106.759	-81.2414	-68.8673	-90.9419	-141.174	-142.052	-120.714	-103.146	-73.9368	-112.906	-103.128	-53.4636	-101.759	-77.8044	-134.807	-110.94	-75.3653
Escherichia coli K12	-64.7723	-59.6767	-69.1383	-62.0799	-74.2615	-88.666	-107.447	-63.0119	-97.9612	-107.674	-63.9853	-83.3958	-43.1247	-110.186	-61.6611	-71.4915	-64.5175	-62.6579	-74.5114	-46.3492	-45.3078	-98.2123	-52.8818	-62.6345	-53.0997	-86.5226	-84.796	-86.4389	-61.267	-92.3366	-33.4235	-59.2046	-46.9421	-48.0891	-65.3128	-42.395	-82.7957	-70.6906	-68.1955	-56.0684	-34.2943	-73.6431	-81.6868	-62.4052	-60.0374	-46.4499	-83.8098	-66.3178	-50.8792
Synechococcus sp. WH 8102	-74.1913	-132.227	-117.454	-82.448	-119.238	-92.8431	-161.701	-69.2203	-137.75	-144.99	-84.7882	-102.148	-75.3315	-148.116	-74.7041	-92.638	-122.863	-87.0623	-73.3905	-86.5521	-83.8683	-133.992	-81.3864	-83.0464	-88.6706	-79.4636	-90.6225	-123.868	-61.0362	-128.279	-96.2892	-94.6978	-91.2011	-81.8389	-81.0878	-77.0374	-106.12	-109.474	-114.335	-90.4924	-71.2232	-83.8728	-99.9193	-46.3386	-82.63	-75.983	-118.577	-74.4164	-78.8057
Helicobacter pylori J99	-79.9532	-111.161	-102.09	-89.4162	-108.2	-99.4522	-123.771	-66.3807	-124.961	-101.994	-76.6053	-102.817	-70.2843	-121.302	-69.8734	-102.895	-100.218	-84.9145	-71.2456	-68.7315	-64.3271	-109.375	-71.2387	-66.4077	-80.9928	-83.1762	-98.8996	-105.979	-80.3338	-118.814	-82.5841	-87.1616	-70.9935	-75.4819	-68.0054	-80.5412	-80.0596	-72.8801	-75.2487	-77.7392	-56.8487	-74.2865	-70.7131	-62.3099	-67.8831	-57.0456	-92.0264	-82.6299	-77.5373
Shewanella sp. ANA-3	-93.3491	-113.807	-113.194	-111.747	-121.436	-104.576	-145.913	-89.0448	-126.745	-133.767	-99.9029	-108.799	-87.0538	-147.048	-92.4271	-132.503	-119.827	-122.627	-117.364	-108.976	-98.6773	-109.182	-108.997	-91.97	-104.896	-116.589	-119.966	-112.012	-112.805	-128.206	-106.224	-95.2911	-99.8178	-98.1805	-100.858	-84.3259	-91.0907	-97.9272	-80.9859	-109.886	-54.5652	-95.5417	-92.2147	-94.151	-94.5689	-83.6815	-111.304	-94.0767	-75.5924
Desulfococcus oleovorans Hxd3	-85.394	-47.036	-52.5652	-61.7592	-66.4243	-3.14187	-24.9604	-5.46454	-5.78692	46.1654	-8.79275	5.4927	-71.9718	-22.4507	-67.1064	-101.937	-57.3178	-104.06	-83.6072	-68.3002	-53.1465	-6.37526	-85.8127	-17.1825	-60.2868	-81.1456	7.11712	-19.5306	-98.6867	9.62193	-46.3679	-50.3578	-42.3135	-59.3915	-91.2806	-50.1408	2.0912	-14.2355	-8.96172	-58.3892	-56.378	-11.4019	-18.0607	-41.9948	-48.9908	-25.9405	-4.26158	-86.2181	-55.6506
Salmonella typhimurium LT2	-56.8771	-48.1022	-58.4631	-45.0456	-50.7619	-70.7306	-82.3149	-57.6651	-68.7098	-101.323	-49.445	-58.2366	-40.213	-88.0578	-58.8376	-84.9724	-53.2469	-60.1601	-54.1477	-29.9701	-26.4902	-73.9752	-60.9527	-41.7708	-45.2823	-87.0799	-67.2833	-74.8498	-81.9677	-81.9478	-40.0096	-49.5742	-38.6058	-30.7786	-49.4183	-43.5368	-50.844	-34.6477	-59.0525	-48.2957	-35.9921	-45.0668	-49.1289	-49.5108	-49.1336	-41.4258	-69.4576	-55.728	-35.6622
Streptomyces coelicolor A3(2)	-46.2364	-74.2492	-73.1391	-71.2453	-70.6981	-82.4051	-103.264	-71.8648	-109.924	-95.6758	-74.6712	-89.2358	-50.6664	-106.698	-39.8466	-62.7044	-79.2124	-46.5984	-56.9403	-44.7743	-39.1143	-100.473	-51.7349	-62.4946	-61.6691	-77.4135	-75.4729	-70.084	-50.4116	-93.4591	-48.0022	-62.0508	-61.2132	-30.8198	-53.7327	-47.2629	-89.6063	-88.2566	-88.6793	-58.4509	-41.6896	-86.7516	-55.4058	-33.7227	-68.2453	-48.5037	-92.6897	-46.8254	-47.6844
Rhodococcus sp. RHA1	-44.2816	-69.8857	-71.8813	-70.9583	-74.5818	-74.854	-96.9419	-57.9374	-92.0495	-86.6129	-73.6156	-92.5678	-41.1282	-99.9285	-54.2805	-54.1191	-74.1329	-40.2849	-40.9527	-33.6806	-35.4318	-99.214	-41.9597	-45.7426	-63.5345	-48.7925	-80.078	-63.1449	-65.5685	-96.2639	-53.6739	-55.6949	-63.32	-41.3098	-36.873	-50.9647	-86.2982	-77.9531	-80.5843	-72.4712	-51.4745	-79.5427	-47.582	-39.5212	-67.0731	-48.5493	-93.0098	-45.1239	-56.1373
Nostoc sp. PCC 7120	-52.5995	-72.6862	-80.2371	-67.5396	-63.666	-37.4114	-68.2256	-36.3128	-64.7117	-97.2511	-36.5176	-66.142	-75.5735	-71.2936	-71.0964	-104.682	-83.8408	-112.423	-100.548	-82.9561	-80.8527	-54.0856	-104.567	-33.4122	-85.4607	-89.4282	-41.9436	-61.1617	-40.365	-71.9502	-45.9694	-77.3219	-62.6427	-91.8683	-91.6149	-58.2749	-54.6883	-54.3564	-63.8202	-64.8268	-57.0841	-42.9126	-43.2948	-36.59	-53.6402	-44.7663	-62.3555	-59.424	-48.4101
Frankia sp. CcI3	-78.3415	-101.908	-101.272	-82.6976	-104.563	-81.5578	-138.801	-71.5725	-127.263	-129.936	-92.3645	-120.022	-72.7313	-138.604	-66.4702	-126.983	-96.0334	-82.4654	-70.5689	-71.512	-69.0606	-117.707	-81.3474	-74.6512	-73.9207	-104.397	-93.0861	-99.4218	-80.3343	-117.687	-82.7378	-68.3812	-77.3359	-74.3836	-79.8751	-70.3535	-111.733	-113.541	-107.894	-74.9301	-63.7759	-91.9891	-78.9926	-52.153	-73.8979	-61.3144	-113.134	-80.1733	-65.5004
Buchnera aphidicola str. APS (Acyrthosiphon pisum)	-21.5735	-42.2358	-41.0603	-28.9057	-41.7914	-36.2576	-46.9932	-22.551	-50.2772	-49.1982	-28.3998	-33.5744	-7.60979	-47.425	-28.6579	-30.8543	-40.9372	-23.9017	-20.2561	-26.483	-24.1555	-43.9954	-22.1873	-19.3539	-27.5293	-23.9889	-26.9898	-43.4334	-19.4453	-37.9379	-41.3061	-24.5545	-23.2692	-16.2252	-22.239	-29.9249	-39.9784	-33.7885	-25.8825	-26.0156	-26.2202	-26.0911	-33.2086	0.742925	-28.4813	-11.7947	-29.5889	-24.4787	-32.5155
Synechococcus sp. CC9605	-74.3856	-132.685	-119.939	-89.6062	-125.791	-97.0026	-177.53	-70.6814	-156.763	-151.161	-87.5797	-114.949	-75.8952	-158.441	-83.8459	-104.405	-129.13	-86.0852	-77.568	-86.2712	-89.5457	-134.572	-87.7715	-81.4218	-92.8594	-81.2639	-92.165	-126.339	-62.0216	-128.3	-93.4387	-99.2939	-85.606	-88.9162	-88.3364	-89.4893	-109.253	-103.357	-122.625	-91.4947	-69.0591	-89.8183	-92.7227	-49.2979	-88.7231	-76.4897	-117.7	-75.7027	-82.0179
Bradyrhizobium sp. ORS278	-61.6349	-90.2954	-73.9592	-48.7202	-87.4048	-63.8164	-99.6712	-53.1512	-82.4903	-78.7028	-77.2142	-80.6552	-39.6299	-99.1274	-41.9448	-41.4506	-72.7267	-38.5444	-21.0455	-44.1642	-49.5537	-86.0722	-36.3525	-46.4444	-48.8208	-35.0374	-59.5499	-94.8206	-33.5991	-75.965	-54.8121	-60.0004	-49.0307	-51.8099	-46.3805	-58.0405	-78.3825	-82.0383	-66.8917	-46.3206	-60.1141	-72.5183	-66.3743	-43.934	-47.6723	-51.7076	-56.0478	-60.7245	-45.9283
Chlamydophila pneumoniae AR39	-97.8213	-122.669	-114.61	-99.7368	-126.548	-112.282	-147.208	-85.8912	-146.063	-128.14	-96.3441	-118.056	-90.3931	-142.633	-77.7872	-130.48	-120.419	-123.208	-107.918	-85.9776	-84.8204	-113.586	-101.558	-90.4889	-99.4843	-113.583	-110.577	-131.309	-112.895	-114.479	-93.6365	-99.0267	-99.3213	-97.5083	-111.068	-79.5596	-106.369	-105.85	-91.968	-109.475	-74.7614	-94.0719	-102.381	-80.935	-94.5742	-81.0268	-111.471	-98.1608	-77.3885
Francisella tularensis subsp. holarctica	-69.1148	-119.299	-106.285	-97.4653	-121.104	-113.271	-148.982	-87.2395	-142.849	-138.298	-114.077	-110.885	-60.7426	-143.96	-79.8164	-118.462	-107.698	-83.5006	-80.0721	-60.0725	-62.0693	-136.838	-73.0869	-90.5374	-97.8492	-91.3808	-113.88	-134.556	-96.1075	-128.736	-85.7148	-89.3731	-93.3114	-77.0859	-77.5049	-71.4811	-120.347	-120.166	-103.917	-96.622	-76.3341	-110.314	-110.784	-64.8747	-94.572	-80.37	-114.437	-70.9178	-63.8872
Thermotoga sp. RQ2	3.0635	90.9598	99.4625	44.7991	103.995	23.2458	15.6978	20.6354	9.37819	34.844	23.5331	15.9189	9.79668	21.8822	43.7731	3.86416	96.1106	24.2766	21.1462	23.1979	21.1269	7.58778	26.0877	4.20036	37.455	-12.1944	18.5177	7.35214	-6.33221	7.30658	58.3835	67.4703	47.2131	49.4947	22.5551	70.9252	4.0451	13.4869	-4.62221	39.9048	54.9005	9.10099	3.55791	-25.2924	47.1	25.984	-7.72701	2.23206	54.6649
Desulfitobacterium hafniense Y51	-62.4447	-17.4289	-21.798	-40.2051	-33.1899	9.32202	69.6782	-20.245	51.488	4.86761	-2.79621	23.1689	-65.9672	30.034	-28.5071	-100.105	-27.9544	-79.0196	-63.7836	-66.3995	-55.3446	31.4844	-69.0781	12.1989	-49.7044	-94.3456	-17.6573	17.6663	-86.3715	11.6041	-33.9252	-20.9258	-25.3418	-49.8801	-41.3066	-37.792	13.347	17.6162	38.2996	-43.8206	-25.8317	-1.35029	34.5708	-58.8778	-22.2437	-31.3271	11.92	-54.6651	-26.5199
Magnetococcus sp. MC-1	-98.0411	-110.832	-88.5913	-113.229	-103.334	-68.2855	-121.593	-42.5915	-96.5088	-104.853	-64.7667	-63.795	-95.9756	-107.536	-89.8864	-138.202	-97.3681	-129.67	-94.6422	-88.9719	-85.373	-106.4	-113.497	-59.504	-112.014	-107.785	-72.8512	-107.471	-105.669	-94.8126	-104.59	-89.5656	-95.687	-102.521	-99.9261	-100.251	-69.616	-73.6614	-78.9943	-95.9915	-85.4468	-44.4339	-76.106	-62.4557	-81.4711	-57.6131	-83.088	-100.25	-84.1748
Dechloromonas aromatica RCB	-67.9014	-84.1166	-91.5597	-68.8256	-100.71	-73.0612	-84.5627	-49.2266	-84.9394	-72.5081	-60.1776	-73.8955	-58.1166	-91.181	-62.4195	-79.498	-88.992	-71.0505	-53.6842	-66.2762	-58.1853	-83.8273	-54.1068	-56.9122	-71.8706	-43.95	-67.2444	-86.3734	-51.5866	-72.9294	-78.9887	-75.633	-68.5293	-83.9161	-57.428	-72.7878	-69.0686	-76.951	-61.5685	-68.8423	-57.7557	-51.8322	-63.0047	-46.1651	-63.5558	-43.705	-65.5264	-72.4825	-70.2284
Streptococcus pyogenes M1 GAS	-65.9414	-98.0199	-105.39	-92.2241	-117.675	-109.235	-141.47	-96.4248	-148.823	-141.019	-118.032	-123.311	-74.7825	-144.579	-70.7972	-104.676	-104.939	-93.8719	-88.8275	-74.7679	-68.6915	-128.945	-79.8147	-72.672	-85.6463	-101.335	-120.762	-121.169	-95.5834	-123.393	-67.1257	-87.5999	-89.2747	-87.1382	-96.117	-63.1558	-106.234	-107.282	-92.686	-87.6212	-62.8683	-109.108	-84.55	-91.9286	-95.6651	-93.0272	-124.746	-66.7194	-45.6896
Xylella fastidiosa 9a5c	-138.395	-174.52	-155.645	-130.733	-170.738	-151.429	-206.421	-108.86	-191.522	-187.577	-140.044	-162.424	-113.772	-191.582	-109.772	-188.603	-158.807	-135.099	-126.352	-112.047	-115.226	-175.134	-121.865	-113.731	-133.051	-157.526	-146.125	-180.417	-140.181	-169.184	-124.958	-132.156	-113.637	-112.031	-130.163	-123.986	-149.398	-150.199	-135.177	-127.465	-104.1	-143.451	-141.594	-98.2073	-121.299	-92.8208	-160.904	-142.858	-113.179
Wolbachia endosymbiont of Drosophila melanogaster	-73.7642	-117.758	-107.781	-96.8708	-118.865	-93.4315	-127.14	-70.3468	-120.139	-132.423	-87.9299	-92.6976	-74.9715	-128.304	-83.8603	-108.694	-118.868	-96.9253	-87.1214	-77.7563	-72.7681	-114.743	-95.5279	-82.7886	-90.6138	-84.6754	-97.4456	-119.876	-85.3623	-123.327	-99.6729	-92.8348	-94.5463	-85.398	-93.3206	-85.0643	-105.991	-100.439	-86.9434	-93.3835	-78.2066	-84.1813	-96.8765	-56.5862	-87.4042	-70.9586	-107.164	-76.2078	-78.705
Mycobacterium sp. MCS	-70.053	-91.9193	-89.3715	-83.0379	-99.7908	-72.8662	-130.268	-70.438	-135.479	-87.4336	-90.7929	-111.401	-46.1637	-120.007	-60.9819	-73.2194	-92.7931	-60.9564	-39.7119	-55.4991	-55.8809	-127.819	-46.4189	-55.3169	-80.7726	-71.1936	-93.1702	-109.076	-58.573	-121.675	-67.9455	-84.4853	-75.0073	-58.6138	-54.4639	-64.3735	-104.882	-109.571	-107.57	-78.0166	-54.8673	-97.2665	-65.112	-50.9178	-69.3916	-53.7491	-111.343	-65.608	-54.7666
Mycobacterium sp. JLS	-68.504	-90.3837	-87.8588	-83.955	-100.281	-73.2728	-124.572	-69.6646	-134.595	-85.4353	-92.9809	-111.866	-52.5643	-115.137	-61.0471	-80.1799	-94.3287	-56.1273	-45.4711	-57.9013	-56.1629	-128.422	-46.2589	-56.6023	-78.7372	-71.0816	-94.6372	-109.152	-60.3426	-121.278	-61.7276	-83.9667	-76.6987	-53.7196	-58.0548	-65.8682	-109.099	-107.782	-101.906	-77.0107	-57.4462	-100.436	-64.4233	-45.8781	-73.9825	-55.0153	-108.137	-67.1273	-55.1951
Colwellia psychrerythraea 34H	-91.0174	-115.608	-105.965	-108.652	-124.341	-113.954	-155.066	-85.8558	-153.565	-117.421	-92.4671	-110.96	-96.7179	-153.994	-97.7947	-141.418	-116.031	-133.671	-113.029	-110.214	-98.3173	-123.407	-115.196	-94.3027	-114.081	-107.222	-120.827	-138.464	-112.462	-126.304	-117.666	-105.092	-89.155	-98.0691	-120.762	-83.9689	-101.224	-99.9714	-94.0613	-111.166	-77.861	-105.042	-98.868	-90.2664	-108.218	-86.8591	-121.683	-96.1389	-81.7999
Listeria monocytogenes EGD-e	-31.1679	-89.979	-68.0323	-67.2965	-82.2034	-82.8588	-104.312	-57.1343	-108.332	-96.2284	-78.332	-83.9903	-33.3981	-97.4167	-48.2593	-71.7582	-82.2586	-54.8831	-58.0454	-29.5977	-37.7683	-87.7785	-54.5817	-65.0794	-67.6204	-64.4613	-88.5922	-75.1815	-48.038	-76.7839	-57.3436	-67.5537	-68.1201	-47.5985	-64.8569	-62.2953	-70.7979	-61.5795	-55.6129	-74.0205	-55.4491	-78.7492	-60.9819	-63.7582	-68.749	-61.1088	-55.5338	-31.6417	-54.4645
Staphylococcus epidermidis RP62A	-35.664	-92.5507	-77.7186	-66.8058	-86.5674	-102.15	-121.273	-64.4284	-108.275	-108.407	-72.0184	-104.552	-40.7094	-108.66	-54.0005	-58.3105	-83.1742	-62.5215	-52.8024	-42.8807	-41.1951	-113.44	-56.8098	-64.309	-74.0298	-44.0274	-101.951	-92.3621	-44.5531	-100.693	-70.5297	-68.9683	-74.5169	-57.1904	-56.5046	-58.239	-89.4292	-78.7685	-79.6502	-79.8403	-60.4465	-76.1125	-69.2067	-39.6841	-73.9284	-55.192	-95.9944	-36.8941	-51.9938
Agrobacterium tumefaciens str. C58	-67.7336	-97.8459	-75.254	-69.9351	-91.6649	-100.925	-102.259	-73.9203	-105.9	-108.132	-89.3623	-83.3085	-61.9948	-112.396	-49.5717	-63.5432	-89.5627	-71.0969	-64.7583	-61.3519	-67.9928	-107.408	-64.283	-82.6618	-72.5642	-79.8864	-93.0888	-117.592	-50.5428	-94.2695	-61.1762	-92.3773	-77.4172	-59.1002	-73.8686	-62.2457	-103.365	-95.0711	-75.7783	-73.747	-59.5435	-99.8744	-82.39	-68.7203	-66.0293	-81.1354	-95.5036	-67.1378	-58.7873
Desulfotalea psychrophila LSv54	-74.0725	-53.3681	-65.9767	-71.832	-60.7468	-34.5253	-43.5211	-40.0976	-36.4952	-38.776	-36.4293	-38.7002	-77.8762	-56.1258	-61.2603	-103.839	-59.6391	-104.633	-87.3674	-72.3196	-63.1936	-28.4305	-91.5252	-37.7108	-76.3428	-88.5202	-39.2002	-67.3058	-95.194	-27.4893	-58.7154	-54.753	-51.544	-85.4279	-85.0597	-53.643	-13.39	-27.7425	-2.34733	-66.4601	-46.8065	-28.0301	-25.5281	-78.0754	-53.2879	-54.5343	-49.2793	-76.8702	-49.1975
Alkalilimnicola ehrlichei MLHE-1	-27.2055	-64.5907	-66.5494	-37.0525	-73.8246	-54.4314	-57.5054	-33.4981	-56.4165	-52.1012	-52.7134	-40.745	-43.2395	-73.5344	-13.914	-10.3128	-54.8617	-45.9389	-36.9785	-41.3381	-44.4968	-53.6379	-34.546	-58.5432	-31.3842	-5.71787	-58.216	-52.2048	-1.19018	-56.5844	-53.8607	-47.0854	-33.7673	-42.3603	-31.7898	-43.71	-53.3289	-66.084	-46.194	-23.7657	-28.917	-53.1439	-56.4977	-28.4973	-22.351	-22.4923	-51.3764	-28.6946	-44.8466
Mycobacterium sp. KMS	-74.0571	-94.1965	-91.7169	-88.5666	-101.143	-73.9836	-129.855	-73.0665	-137.543	-86.1923	-93.3137	-115.667	-52.0536	-122.11	-65.9403	-79.4544	-92.2706	-67.0215	-48.6161	-60.4115	-62.4502	-129.465	-53.5474	-57.1056	-84.4346	-77.4116	-97.453	-110.033	-63.4687	-123.325	-71.1188	-86.8117	-78.9116	-62.6773	-59.8849	-66.743	-106.47	-111.143	-109.481	-81.7642	-59.4664	-97.7326	-66.9672	-53.5683	-75.0174	-54.4831	-115.524	-69.8044	-58.9513
Fusobacterium nucleatum subsp. nucleatum ATCC 25586	-102.825	-110.93	-99.6485	-104.813	-115.394	-125.791	-121.149	-105.546	-127.467	-123.489	-104.216	-111.068	-98.2147	-133.235	-85.4682	-137.183	-106.114	-116.646	-107.074	-73.2229	-79.4898	-125.954	-106.391	-92.7158	-117.049	-121.805	-118.152	-126.299	-122.785	-127.084	-94.8102	-90.561	-103.196	-107.123	-112.194	-78.0215	-113.152	-101.772	-71.4191	-109.843	-87.7788	-98.3825	-81.6897	-81.8788	-103.734	-98.9319	-126.307	-100.774	-63.73
Xanthomonas axonopodis pv. citri str. 306	-85.8193	-100.352	-110.726	-99.7066	-116.993	-115.062	-144.336	-95.3062	-144.986	-149.835	-107.132	-99.4056	-73.3663	-136.309	-82.4288	-138.186	-121.423	-96.5037	-83.9324	-84.2171	-78.8446	-123.938	-90.6364	-91.3076	-101.892	-120.458	-108.52	-118.2	-107.537	-128.939	-91.9668	-83.8291	-93.5658	-79.2621	-90.3368	-84.8314	-117.411	-107.233	-101.436	-102.891	-73.1606	-112.764	-106.6	-73.1352	-98.2243	-77.9948	-109.207	-90.5974	-86.0394
Caulobacter crescentus CB15	-70.7119	-121.123	-124.86	-100.683	-128.63	-119.55	-165.284	-95.74	-164.121	-129.365	-118.905	-134.136	-68.5489	-148.161	-77.3264	-107.337	-119.674	-81.4482	-71.3067	-68.4968	-73.8759	-136.811	-67.19	-107.696	-96.4798	-97.6234	-120.148	-142.053	-97.4412	-142.204	-96.9218	-104.84	-97.0525	-63.0105	-74.5682	-92.4914	-119.816	-116.851	-113.251	-107.455	-83.7268	-121.573	-117.325	-65.9131	-90.7984	-85.7849	-115.543	-75.9386	-81.3906
Chlorobium tepidum TLS	-37.9457	-56.3512	-55.4716	-49.836	-57.0775	-12.6857	-3.60242	-26.296	-1.57076	-30.6889	-27.5281	-6.55658	-33.2142	9.93045	-40.0007	-79.4821	-51.7311	-53.7379	-40.9379	-27.5843	-23.9129	-9.61752	-47.5027	-11.5946	-56.0406	-51.4942	-9.5962	-18.1674	-54.0436	-22.4589	-42.8409	-42.482	-46.219	-28.6536	-27.3481	-54.1001	-23.2843	-15.3314	-14.7363	-43.3903	-23.4206	-11.131	-26.3884	-7.34156	-33.3265	-22.2392	-10.017	-33.9924	-47.4251
Campylobacter jejuni RM1221	-75.8864	-106.928	-103.009	-63.8295	-100.937	-84.5701	-119.949	-60.7902	-110.11	-108.101	-66.2346	-95.3875	-57.7608	-111.715	-64.4822	-94.6294	-100.626	-86.5036	-87.5046	-66.1495	-66.2404	-86.8318	-88.5781	-78.5451	-69.1628	-81.4334	-94.3376	-111.946	-73.4005	-116.936	-93.72	-86.9803	-55.3345	-72.0455	-72.1407	-85.0868	-60.0769	-77.5593	-82.5018	-73.6496	-75.1637	-65.7248	-76.299	-45.8319	-56.4042	-47.3134	-84.7901	-74.7262	-73.3044
Clostridium perfringens ATCC 13124	-92.8006	-83.9392	-76.8445	-89.4854	-82.1785	-79.7575	-94.1883	-74.7048	-101.037	-111.601	-76.9295	-96.1748	-88.7223	-96.1736	-76.2896	-132.206	-74.2058	-110.546	-90.5143	-64.7633	-70.9149	-113.128	-92.0999	-56.8067	-95.8217	-140.439	-97.5714	-94.7902	-112.851	-71.0409	-43.1571	-79.3889	-85.1374	-78.7971	-107.325	-43.9471	-76.6301	-70.3703	-45.5247	-86.1926	-57.1847	-76.3675	-58.7909	-97.9207	-89.6949	-76.7106	-95.8579	-96.2986	-41.0651
Nocardioides sp. JS614	-27.0006	-71.6026	-67.959	-50.6413	-82.3346	-85.9486	-119.051	-61.8531	-105.551	-67.4091	-80.4648	-90.9535	-31.7024	-119.98	-36.7829	-1.38627	-71.0249	-25.6484	-34.0097	-32.1986	-24.3034	-95.3987	-23.1759	-56.2992	-51.0701	-31.2	-70.8208	-85.4508	-47.4415	-101.296	-36.6572	-55.0858	-55.1467	-46.0566	-39.7449	-47.9632	-95.2212	-81.9685	-93.0568	-48.1541	-45.8542	-79.0394	-71.8641	-37.2552	-59.2113	-53.8558	-88.6729	-27.1215	-45.7949
Corynebacterium efficiens YS-314	-88.0778	-143.83	-114.452	-95.8604	-123.098	-117.524	-161.929	-91.8171	-166.43	-133.338	-123.086	-139.502	-74.3868	-161.669	-83.3606	-92.1549	-129.078	-91.9055	-71.4768	-77.1127	-85.2228	-164.788	-76.1639	-89.2264	-98.2237	-78.4161	-130.501	-138.995	-72.4986	-145.522	-85.7871	-99.042	-96.1618	-87.2002	-80.282	-93.2454	-128.248	-119.907	-123.314	-99.5385	-84.6532	-116.563	-97.3733	-63.2469	-96.5731	-91.8912	-134.487	-87.6264	-81.2595
Thermosynechococcus elongatus BP-1	-49.241	-103.183	-93.7891	-71.208	-100.157	-54.9056	-87.1143	-48.8977	-75.4513	-101.375	-65.3193	-62.5962	-48.9754	-76.6994	-56.854	-72.4569	-95.9038	-72.2053	-57.8247	-53.5044	-49.83	-90.1674	-64.7506	-48.3793	-67.4231	-53.9494	-48.5509	-79.7731	-32.8136	-84.6661	-64.7851	-78.9939	-60.2192	-58.6418	-60.4892	-79.7718	-79.151	-65.5996	-88.3438	-68.3162	-63.824	-58.3423	-69.0966	-22.1776	-65.755	-57.6597	-62.9568	-54.4361	-69.6244
Bacillus anthracis str. Ames	-5.13134	-50.6492	-39.0506	-59.5527	-36.4594	-60.7521	-69.7101	-40.8262	-75.4282	-72.7123	-49.2837	-85.1057	-34.4249	-48.9187	-36.1381	-51.3459	-36.3384	-67.2303	-55.0511	-30.7895	-33.4751	-78.1476	-52.543	-45.5422	-57.1631	-43.1067	-73.8903	-52.1378	-43.8143	-63.0105	-34.8579	-40.1749	-55.1273	-58.6463	-53.2225	-36.0415	-48.2687	-52.9776	-26.6308	-64.3358	-35.3033	-61.8022	-29.2572	-45.3215	-57.7804	-25.0232	-67.1666	-5.50906	-31.6096
Shigella flexneri 2a str. 2457T	-70.0906	-66.0131	-77.5055	-61.966	-81.5854	-97.069	-121.777	-60.6865	-111.495	-105.428	-69.6925	-89.639	-45.6525	-113.695	-57.5351	-88.521	-72.8041	-81.5996	-83.7751	-53.977	-57.0068	-109.283	-77.0686	-67.2136	-53.9491	-90.3995	-83.1193	-110.039	-74.3051	-102.442	-47.5831	-62.5608	-53.0627	-59.8582	-74.6584	-52.8082	-81.3789	-71.293	-73.6299	-56.9147	-35.6055	-71.3541	-89.2049	-58.2715	-48.2598	-46.0643	-95.7338	-67.584	-57.3569
Clostridium thermocellum ATCC 27405	-114.109	-49.3617	-38.0935	-70.4493	-40.7259	-48.5949	-64.3712	-34.5408	-56.5636	-67.1958	-40.875	-43.4812	-99.2516	-63.1436	-66.0047	-128.739	-47.6194	-107.526	-90.5324	-83.868	-73.7814	-51.0071	-91.6204	-10.9955	-64.9362	-123.108	-53.1716	-55.475	-105.979	-45.1517	-42.7454	-39.8448	-53.3933	-69.9952	-88.25	-21.8994	-20.5999	-31.9919	-11.4185	-62.0768	-37.9542	-24.4624	-21.7214	-61.7062	-55.235	-33.9206	-41.8075	-115.868	-26.52
Leuconostoc mesenteroides subsp. mesenteroides ATCC 8293	-74.1679	-112.994	-106.775	-95.236	-107.349	-112.053	-126.725	-78.9716	-132.53	-126.061	-108.921	-121.941	-74.7227	-118.009	-87.8826	-100.726	-102.531	-82.4251	-74.2805	-84.3461	-83.5766	-115.425	-69.5221	-70.2958	-80.4922	-86.2296	-118.236	-102.855	-71.7334	-115.057	-75.746	-84.6757	-89.9456	-70.7614	-70.2818	-75.279	-112.791	-106.632	-90.5077	-91.4602	-85.8449	-109.913	-76.9595	-75.5305	-88.6297	-83.5955	-99.6282	-75.0852	-74.1241
Saccharophagus degradans 2-40	-111.646	-147.435	-144.957	-125.006	-148.997	-130.548	-165.335	-91.4015	-161.227	-163.352	-117.435	-109.977	-109.393	-166.404	-109.571	-146.987	-146.185	-137.846	-125.293	-114.806	-105.895	-132.472	-129.522	-107.845	-130.958	-120.578	-124.53	-170.828	-115.623	-148.663	-110.862	-118.002	-114.303	-110.802	-129.243	-95.3022	-127.011	-113.942	-115.134	-124.923	-101.012	-123.099	-115.783	-89.2961	-114.586	-86.7277	-124.801	-112.096	-91.9059
Oenococcus oeni PSU-1	-83.2813	-117.339	-98.8582	-97.6609	-126.978	-112.58	-140.555	-82.9005	-143.96	-129.344	-114.372	-130.493	-56.2509	-144.678	-84.3658	-107.847	-105.314	-77.2698	-71.2658	-67.306	-70.2215	-129.094	-72.2507	-86.0343	-94.0873	-114.584	-118.1	-106.375	-81.8865	-130.601	-70.7385	-84.0836	-92.7316	-78.6066	-74.54	-66.796	-122.461	-116.533	-106.011	-97.0837	-74.4944	-117.431	-80.8722	-86.3972	-92.1357	-87.5553	-106.026	-85.0566	-66.3433
Trichodesmium erythraeum IMS101	-86.3332	-124.54	-103.911	-91.0415	-105.186	-79.23	-156.832	-74.3966	-133.418	-130.207	-70.2112	-102.615	-91.8264	-138.747	-77.7799	-129.128	-107.63	-118.164	-99.4835	-86.6531	-89.2543	-132.199	-105.213	-63.4243	-99.2393	-97.1125	-83.7122	-123.613	-60.1433	-121.193	-91.2268	-93.0161	-85.8263	-96.6406	-107.855	-73.0078	-86.5204	-89.3381	-107.592	-83.2416	-62.3685	-67.8409	-74.7336	-49.479	-80.4523	-63.1032	-109.521	-89.1293	-73.1953
Candidatus Blochmannia floridanus	-19.5328	-37.053	-46.0377	-18.8187	-37.5975	-33.9342	-49.2646	-12.9163	-48.4338	-43.2839	-33.7395	-34.2189	-5.68432	-47.5931	-26.6177	-28.1252	-40.8743	-17.2249	-5.50513	-17.6648	-12.311	-44.7357	-11.353	-21.802	-21.4818	-22.0363	-38.6622	-41.4493	-11.4903	-42.7465	-30.4039	-23.2697	-18.1591	-5.29291	-8.37236	-24.754	-47.3836	-40.2052	-25.4784	-22.013	-22.0341	-35.386	-30.7808	-1.19334	-18.2554	-4.26477	-26.4969	-20.4743	-31.3017
Acidobacteria bacterium Ellin345	-64.7081	-51.8136	-37.1646	-38.1687	-50.5206	-72.2504	-100.902	-40.479	-83.6923	-83.7828	-59.1462	-80.1054	-22.5966	-81.0964	-44.179	-124.016	-57.1427	-70.5423	-51.4448	-27.1652	-22.4114	-96.3248	-41.4927	-55.8189	-33.5335	-101.257	-60.021	-46.6669	-100.704	-77.2424	-51.4761	-24.2884	-35.0169	-11.3525	-47.3653	-30.1844	-80.798	-74.562	-59.433	-38.5911	-44.9355	-64.7379	-56.3207	-26.731	-39.2323	-31.4053	-45.3352	-65.7388	-31.112
Brucella suis 1330	-48.6889	-118.184	-100.696	-60.9658	-118.574	-115.278	-137.281	-85.5456	-126.074	-102.07	-105.873	-109.686	-46.2166	-122.745	-57.2954	-51.4061	-114.468	-62.3787	-62.8845	-53.5194	-49.3594	-137.585	-62.1007	-91.2867	-52.4972	-52.5086	-101.034	-122.803	-40.0201	-134.575	-68.5135	-75.4922	-71.4847	-63.6065	-65.5535	-73.2517	-116.023	-106.344	-88.0977	-59.5964	-67.5054	-99.4837	-101.178	-52.1998	-74.147	-81.0304	-117.48	-46.519	-60.7514
Herminiimonas arsenicoxydans	-89.6489	-129.663	-116.12	-75.6375	-128.061	-104.72	-142.322	-94.8073	-145.008	-135.836	-101.131	-101.264	-65.0142	-139.703	-79.9111	-97.9371	-124.957	-92.4202	-81.7887	-68.2344	-65.0535	-116.263	-72.0399	-78.6233	-78.1815	-66.6909	-101.524	-113.689	-72.1061	-115.214	-81.9873	-91.9277	-70.0408	-83.3063	-80.4426	-92.6118	-106.392	-107.695	-93.5374	-71.2704	-81.9193	-89.7474	-83.5591	-56.8666	-62.6542	-75.3212	-105.189	-91.4987	-91.0788
Haemophilus somnus 129PT	-76.7581	-107.91	-104.878	-88.3758	-117.825	-108.706	-132.336	-88.7511	-133.831	-129.975	-108.461	-108.485	-74.4616	-146.205	-72.8218	-102.358	-106.932	-101.735	-94.0087	-73.2945	-74.3426	-125.692	-87.0518	-84.8259	-92.7323	-86.6959	-123.393	-118.072	-71.0232	-114.171	-76.3776	-86.8967	-89.0488	-79.78	-98.5493	-73.9364	-99.5559	-94.1983	-83.5027	-86.3533	-69.9043	-100.829	-96.343	-73.5678	-84.2095	-73.5503	-108.411	-77.5803	-67.2437
Pseudomonas syringae pv. syringae B728a	-63.8938	-89.5791	-84.9513	-81.4917	-93.3458	-88.8104	-108.737	-61.3163	-103.87	-98.4478	-73.8563	-78.9895	-51.3856	-114.328	-74.8255	-76.9794	-85.1241	-64.6459	-59.2979	-55.8077	-56.7225	-93.7177	-59.6162	-60.8923	-65.0043	-81.9244	-80.8092	-113.678	-63.9111	-97.5953	-70.1593	-80.079	-69.5603	-69.216	-79.7801	-75.9442	-74.7302	-67.4582	-73.8163	-76.1268	-60.0111	-80.4064	-66.5315	-65.1757	-66.4321	-62.4128	-105.336	-65.1329	-55.6529
Ehrlichia chaffeensis str. Arkansas	-59.8944	-103.562	-92.6502	-80.8736	-96.4227	-74.2599	-115.859	-58.1074	-115.787	-105.093	-65.3949	-85.9227	-61.5722	-118.308	-73.0927	-84.3602	-102.357	-89.2877	-72.041	-66.2192	-64.0482	-106.406	-71.7036	-66.5523	-85.6201	-67.5605	-79.5801	-89.1627	-70.9228	-100.317	-85.9381	-79.1938	-80.4488	-69.6599	-78.1905	-79.9109	-77.336	-71.8161	-75.9674	-80.6275	-64.1198	-68.1687	-68.3375	-41.1108	-73.7386	-60.2763	-90.3986	-62.2241	-59.7559
Bifidobacterium longum NCC2705	-92.4291	-112.588	-95.1718	-82.191	-112.328	-104.664	-133.288	-75.1648	-125.367	-121.575	-101.477	-114.607	-61.587	-127.324	-68.0713	-84.0679	-105.21	-53.0519	-54.7922	-73.2029	-74.1686	-106.419	-60.7936	-66.0079	-75.5913	-93.3128	-116.234	-107.35	-63.2676	-125.557	-54.1604	-81.3088	-69.1296	-55.9386	-64.1625	-67.0431	-108.277	-102.197	-80.2248	-70.452	-64.8332	-108.641	-69.0954	-69.7279	-80.4471	-58.4965	-99.5364	-91.2211	-64.5052
Desulfovibrio desulfuricans G20	-93.9051	-63.6362	-59.335	-64.4893	-67.1511	-20.016	-17.5084	-17.0008	-8.20467	-8.27424	-11.1482	4.26422	-98.5706	-19.2667	-69.1102	-120.362	-62.214	-113.838	-84.4925	-86.4335	-85.7723	-12.5347	-104.426	-20.033	-68.3079	-106.116	-5.67268	-25.0858	-82.8164	-12.8943	-39.5129	-34.3263	-47.7	-82.8805	-94.7128	-64.9178	13.8351	9.8161	-9.70236	-60.2797	-44.2239	-7.81658	-20.7103	-72.7255	-42.3779	-32.0876	-25.3487	-95.1636	-52.7732
Streptococcus agalactiae 2603V/R	-92.8461	-131.179	-120.995	-110.839	-134.735	-142.865	-152.672	-119.581	-168.55	-165.253	-135.827	-132.357	-101.199	-151.568	-88.6406	-132.862	-125.073	-113.3	-108.335	-94.6617	-99.955	-167.617	-110.727	-106.479	-110.061	-135.659	-132.398	-149.959	-100.17	-155.31	-81.5013	-104.93	-101.911	-104.972	-109.557	-88.4118	-132.707	-141.133	-117.641	-109.704	-85.3479	-135.144	-97.7267	-102.71	-112.312	-96.7888	-151.269	-88.8244	-69.996
Salmonella enterica subsp. enterica serovar Typhi str. Ty2	-57.4	-48.4521	-54.8488	-51.1255	-53.0732	-76.258	-93.9909	-59.8738	-78.9394	-99.0748	-53.7522	-69.4013	-45.2096	-100.23	-66.7825	-83.7811	-53.4402	-69.4246	-56.3569	-33.1799	-33.9273	-83.6889	-58.9443	-41.7489	-47.2517	-84.3833	-73.6047	-83.2413	-81.6886	-80.7283	-46.7459	-52.9411	-48.3327	-37.483	-53.9079	-48.9988	-53.8796	-41.7254	-60.6903	-50.2371	-41.1801	-47.3949	-60.962	-48.5149	-50.1431	-43.4768	-71.7176	-57.0955	-46.3028
Streptococcus mutans UA159	-79.9314	-101.195	-93.8017	-75.7809	-104.465	-94.4038	-108.116	-79.1888	-112.281	-117.956	-89.5474	-95.2407	-65.3559	-107.538	-65.1889	-102.186	-89.0151	-89.5298	-77.695	-80.4399	-80.6389	-93.4376	-86.8856	-61.8631	-71.0545	-104.321	-85.4644	-88.9854	-70.2119	-100.45	-71.4281	-75.7053	-72.7179	-67.4765	-79.6038	-77.1907	-87.6219	-93.6301	-72.7253	-75.1553	-68.6205	-100.409	-70.293	-58.2528	-75.5071	-68.0165	-93.316	-79.827	-59.1357
Shewanella oneidensis MR-1	-96.6722	-119.664	-115.032	-119.262	-121.313	-103.341	-159.158	-89.456	-143.703	-147.453	-94.263	-108.753	-88.1303	-155.036	-92.0117	-151.751	-120.766	-125.6	-124.848	-111.941	-102.525	-124.37	-119.593	-97.5008	-103.468	-128.544	-118.838	-117.885	-126.544	-131.359	-91.3985	-87.1391	-92.9978	-95.8903	-106.198	-79.1241	-88.5923	-96.4068	-96.6939	-113.473	-57.5055	-93.891	-94.8211	-89.7056	-90.6023	-81.1745	-116.727	-98.4802	-78.2979
Anaplasma phagocytophilum HZ	-92.7563	-139.478	-123.716	-107.114	-134.794	-113.469	-157.206	-88.3131	-148.517	-143.409	-106.852	-113.185	-89.7008	-152.193	-95.3343	-120.562	-133.945	-114.557	-97.3233	-89.7546	-87.9095	-148.615	-100.579	-97.3161	-114.834	-101.65	-114.282	-134.052	-107.78	-137.824	-107.011	-110.828	-105.832	-97.3603	-99.6111	-95.0218	-114.834	-109.204	-102.936	-106.389	-88.1516	-106.812	-106.296	-75.4074	-104.412	-84.339	-125.605	-95.2708	-79.5101
Clostridium tetani E88	-72.1376	-78.9881	-69.0081	-93.8388	-86.9217	-80.8215	-80.3151	-67.4619	-78.952	-97.6043	-84.7126	-66.8538	-93.5004	-81.0729	-73.908	-113.089	-83.8061	-105.217	-97.1351	-70.3558	-78.6885	-91.1421	-102.99	-54.5721	-93.0479	-115.261	-99.3282	-96.4919	-89.4306	-85.8694	-69.1967	-68.1736	-88.1139	-82.3253	-91.7615	-49.4272	-73.0098	-75.5603	-64.1989	-92.0181	-60.3416	-73.6677	-46.1251	-68.8955	-93.7591	-84.2326	-99.1689	-68.3027	-40.3673
Dehalococcoides sp. BAV1	-0.414493	6.45794	-4.8166	11.5219	19.7988	43.3642	72.0469	37.4707	76.7649	49.6292	31.7382	60.0995	-4.23424	60.2896	0.0706846	-22.1278	10.1079	-1.43434	6.47525	3.92402	7.55162	65.121	4.38403	42.046	15.8613	8.12886	59.7843	78.9826	0.914067	60.6697	8.76533	22.2203	28.815	11.8046	11.9886	11.2777	27.1963	26.036	49.8169	17.6777	8.10285	29.0306	36.8583	27.8982	25.5949	19.5247	55.599	0.983222	8.02317
Rhizobium leguminosarum bv. viciae 3841	-63.6424	-93.282	-70.0218	-62.6311	-87.4892	-88.6786	-70.3151	-71.6944	-83.7319	-109.771	-88.67	-70.5455	-41.7268	-83.4083	-46.3052	-60.0575	-79.8899	-59.6242	-64.0797	-48.4113	-51.4625	-76.2458	-62.5594	-68.1029	-62.843	-71.0033	-81.5301	-86.9975	-58.3557	-85.1648	-41.5691	-74.027	-73.4684	-35.2129	-60.9207	-45.1273	-90.7945	-85.446	-60.5144	-69.4337	-54.3428	-89.9077	-82.0429	-57.9425	-62.8962	-66.2959	-60.6525	-61.9	-51.8595
Vibrio vulnificus CMCP6	-68.7775	-94.7029	-95.0701	-99.3307	-101.353	-104.375	-140.259	-78.4744	-134.791	-133.529	-85.279	-96.7952	-92.2248	-150.125	-96.0838	-102.944	-95.8079	-124.736	-120.961	-96.031	-99.6091	-129.423	-116.712	-84.5246	-99.5397	-98.6784	-120.877	-117.97	-104.668	-116.411	-88.4519	-93.1772	-95.0511	-74.9679	-117.304	-64.1602	-84.6145	-88.428	-76.7254	-99.545	-64.5481	-81.9065	-89.8481	-87.7761	-95.6489	-73.1965	-123.791	-72.5893	-65.3298
Erwinia carotovora subsp. atroseptica SCRI1043	-85.7775	-88.7029	-78.0701	-75.3307	-81.3527	-91.3748	-122.259	-81.4744	-119.791	-136.529	-92.279	-111.795	-67.2248	-119.125	-72.0838	-94.9443	-80.8079	-85.7363	-86.9611	-64.031	-71.6091	-107.423	-77.7119	-68.5246	-74.5397	-95.6784	-97.8773	-106.97	-78.6679	-105.411	-35.4519	-80.1772	-62.0511	-60.9679	-78.3042	-63.1602	-69.6145	-61.428	-77.7254	-69.545	-45.5481	-79.9065	-83.8481	-62.7761	-65.6489	-51.1965	-95.7912	-83.5893	-51.3298
Tropheryma whipplei TW08/27	-17.8995	-44.5616	-35.7588	-33.1484	-40.9789	-43.1023	-65.3607	-34.3572	-59.9905	-68.0365	-40.2014	-48.0892	-15.2659	-58.6808	-24.3151	-42.0413	-37.4473	-28.5512	-30.3517	-25.434	-14.8432	-47.7736	-27.6003	-17.698	-29.5005	-45.5277	-41.5244	-47.517	-33.6182	-55.1486	-38.594	-33.0601	-30.3068	-34.1363	-25.3597	-39.2764	-51.6061	-49.7333	-40.8149	-34.6866	-35.1097	-42.5365	-28.9158	-18.6164	-32.0646	-16.838	-40.2188	-21.5407	-28.011
Chlamydophila abortus S26/3	-74.0205	-96.6722	-90.4264	-75.3623	-90.1937	-89.7769	-105.663	-68.006	-109.505	-103.033	-74.1055	-85.4092	-65.7437	-108.92	-63.3249	-104.617	-92.0527	-99.7907	-85.6204	-64.5986	-60.13	-93.5474	-83.9931	-66.9013	-71.9928	-86.429	-87.735	-97.1795	-91.8751	-80.498	-76.6887	-77.7027	-70.6768	-76.1348	-86.979	-66.2313	-81.0724	-76.4259	-70.3284	-82.2563	-57.7173	-72.211	-70.7972	-57.4256	-70.0898	-60.3528	-78.2412	-77.0426	-60.5096
Pseudomonas fluorescens Pf-5	-49.6764	-68.7107	-62.2631	-71.5881	-80.6922	-89.4328	-103.294	-62.3251	-96.7698	-78.3039	-65.5278	-72.1655	-39.6497	-100.353	-65.1543	-71.8442	-69.8693	-64.5436	-72.6454	-51.0337	-43.9231	-80.1164	-56.6686	-54.4276	-54.5119	-64.5289	-76.9681	-90.2179	-50.4597	-86.9812	-67.0121	-73.3474	-57.6791	-66.9278	-67.7016	-75.3015	-74.6991	-73.367	-62.837	-72.8798	-64.1149	-73.9217	-57.3111	-49.641	-64.6713	-55.7805	-93.3969	-50.5049	-61.4331
Lactobacillus plantarum WCFS1	-111.019	-127.135	-111.288	-119.127	-134.452	-122.603	-170.625	-98.7248	-166.486	-155.244	-111.044	-142.553	-88.2405	-154.9	-106.126	-152.247	-122.372	-117.078	-113.899	-95.4085	-104.431	-161.448	-109.778	-88.6664	-111.547	-141.653	-135.875	-130.72	-115.137	-125.877	-81.7335	-106.959	-107.772	-93.5478	-111.674	-84.5652	-133.003	-128.525	-102.418	-113.769	-97.2882	-132.582	-93.1031	-112.44	-110.909	-93.9398	-122.155	-106.666	-88.3874
Oceanobacillus iheyensis HTE831	-7.63261	-57.5014	-45.5514	-24.173	-70.9539	-87.2464	-101.862	-59.8639	-90.6393	-78.1323	-77.1299	-84.8608	-32.6937	-86.5174	-24.0586	-2.86646	-47.8976	-36.2306	-43.4042	-39.2538	-32.8764	-102.693	-47.9587	-63.2729	-37.8324	-23.5618	-103.448	-75.9351	-23.1791	-83.3422	-44.9277	-47.4512	-41.5886	-33.1234	-45.8985	-47.5677	-74.26	-79.4205	-61.0242	-34.8507	-32.3302	-67.7818	-56.5636	-50.3826	-53.7824	-51.6327	-94.9507	-7.6581	-33.7573
Mannheimia succiniciproducens MBEL55E	-84.5411	-104.651	-111.314	-84.3053	-113.521	-110.648	-129.638	-82.2498	-135.714	-127.466	-102.215	-126.682	-77.84	-133.64	-89.0253	-107.675	-121.63	-102.819	-91.1676	-90.1825	-85.5201	-124.561	-80.9224	-83.7936	-85.5089	-110.812	-134.954	-119.585	-92.4324	-130.637	-68.8314	-89.4245	-78.9571	-83.8835	-88.7311	-72.4104	-101.705	-89.4108	-76.9278	-74.5976	-72.1258	-94.0627	-91.1019	-78.4986	-78.7587	-73.0519	-107.981	-82.6646	-61.4779
Neorickettsia sennetsu str. Miyayama	-58.0205	-80.6722	-81.4264	-76.3623	-85.1937	-72.7769	-102.663	-62.006	-95.5051	-104.033	-70.1055	-74.4092	-54.7437	-98.9199	-67.3249	-81.6169	-86.0527	-83.7907	-69.6204	-60.5986	-55.13	-109.547	-70.9931	-60.9013	-77.9928	-62.429	-80.735	-90.1795	-71.8751	-106.498	-79.6887	-71.7027	-74.6768	-64.1348	-75.979	-69.2313	-75.0724	-74.4259	-77.3284	-71.2563	-71.7173	-65.211	-63.7972	-44.4256	-71.0898	-57.3528	-94.2412	-59.0426	-56.5096
Vibrio parahaemolyticus RIMD 2210633	-67.6818	-86.1505	-85.503	-95.7949	-89.8678	-85.5487	-128.817	-66.6387	-123.484	-121.475	-77.2825	-85.4686	-90.4889	-123.899	-81.8588	-112.866	-84.5187	-119.855	-116.53	-98.0254	-101.212	-119.784	-115.628	-75.0241	-98.1866	-96.5062	-110.363	-116.427	-96.8655	-122.693	-69.9769	-78.6283	-82.4979	-87.0756	-122.373	-64.5154	-80.98	-86.7367	-67.7004	-101.255	-58.326	-73.8672	-82.5532	-71.3787	-89.6494	-66.5977	-114.906	-67.7505	-67.4024
Bacillus subtilis subsp. subtilis str. 168	-21.2357	-50.466	-30.937	-50.7248	-46.0468	-78.4766	-102.915	-48.9088	-90.4946	-85.2771	-65.8927	-69.1559	-22.6542	-89.7115	-42.3014	-49.5412	-38.2908	-49.999	-45.9559	-15.9102	-36.8918	-105.917	-46.3017	-53.5011	-47.7328	-35.8448	-83.5812	-66.9932	-33.6405	-64.0526	-45.1551	-54.9999	-53.6621	-28.6962	-44.784	-31.208	-47.6641	-59.565	-54.0163	-57.7004	-32.0747	-63.5518	-51.5341	-35.0436	-65.79	-36.3276	-77.4676	-21.7644	-31.7129
Aquifex aeolicus VF5	2.60948	36.4973	16.5396	52.1865	46.2374	46.6136	9.27297	59.3602	10.7211	37.0933	53.1562	16.3057	28.8105	21.878	41.4641	0.706668	27.2037	44.3353	59.4686	28.2104	30.4925	-9.60644	49.4988	14.8307	54.6638	15.3091	35.1816	15.6779	-2.19902	16.6192	24.1852	31.8489	47.7476	41.522	50.5303	25.541	25.465	25.8904	8.61336	51.184	55.117	38.3891	26.9406	45.7163	50.0361	64.4475	12.4582	-0.104704	19.7017
Borrelia burgdorferi B31	-162.592	-200.393	-167.214	-169.784	-201.889	-191.87	-256.642	-147.31	-237.488	-200.491	-178.576	-208.384	-169.659	-241.875	-133.633	-213.724	-184.864	-202.079	-188.416	-162.311	-162.154	-229.711	-183.387	-164.459	-173.247	-203.114	-186.339	-215.512	-187.886	-219.713	-137.373	-154.588	-163.015	-170.004	-184.559	-116.661	-188.719	-183.991	-184.128	-170.429	-127.244	-179.506	-178.945	-159.798	-159.536	-135.43	-207.779	-163.344	-113.322
Bradyrhizobium japonicum USDA 110	-47.9822	-69.5329	-60.4429	-51.7371	-77.0219	-70.6554	-76.9322	-48.0442	-74.4912	-57.2074	-54.8274	-60.4709	-41.4778	-81.2818	-40.4693	-52.4248	-60.5465	-39.9846	-41.0271	-44.6584	-41.8947	-65.7816	-43.8623	-60.7051	-49.1893	-37.4043	-56.7518	-64.6384	-45.3591	-62.7787	-58.4807	-61.3388	-50.5912	-54.4514	-44.6659	-50.564	-56.7244	-59.3751	-56.8397	-47.9987	-48.0115	-54.8825	-67.6067	-43.2334	-41.5712	-49.6823	-38.1062	-54.6172	-37.9415
Brucella melitensis 16M	-47.5057	-120.567	-111.273	-55.7294	-118.934	-111.784	-129.807	-81.6546	-123.955	-108.516	-110.989	-107.73	-42.5798	-116.546	-58.2584	-55.3643	-118.827	-61.9507	-59.9028	-56.161	-51.0666	-140.297	-61.0048	-89.1415	-56.221	-48.5954	-100.381	-123.846	-38.4266	-126.424	-67.9416	-74.0294	-71.6267	-63.285	-65.6155	-70.0501	-121.762	-105.145	-90.6079	-68.3568	-73.1268	-98.5787	-99.886	-54.9833	-81.4488	-81.0457	-110.106	-45.2727	-61.6574
Enterococcus faecalis V583	-126.394	-124.036	-107.565	-142.759	-131.424	-150.142	-209.96	-117.465	-204.787	-184.835	-138.793	-171.507	-121.972	-198.451	-105.106	-178.937	-118.318	-144.06	-121.607	-112.3	-116.146	-174.375	-132.813	-122.182	-133.287	-172.146	-153.883	-168.531	-143.687	-148.378	-80.3679	-110.358	-135.314	-109.391	-133.281	-84.1408	-153.909	-143.235	-123.962	-139.389	-96.378	-141.402	-109.061	-130.995	-133.991	-113.94	-149.262	-131.218	-56.6506
Bacteroides thetaiotaomicron VPI-5482	-141.401	-122.054	-115.406	-139.615	-118.768	-110.463	-120.554	-100.593	-118.257	-162.276	-89.2434	-98.3645	-129.232	-122.668	-120.663	-221.332	-124.411	-170.476	-159.217	-114.777	-105.981	-108.652	-164.3	-57.9652	-144.999	-194.146	-102.264	-130.208	-178.531	-105.563	-108.832	-107.531	-125.359	-109.867	-173.083	-88.4201	-97.9279	-94.6867	-80.6238	-146.064	-103.214	-100.83	-66.4865	-109.192	-117.529	-92.5425	-132.742	-140.459	-74.3188
Bacillus cereus ATCC 14579	0.653355	-48.3919	-36.7851	-55.054	-48.191	-67.5258	-65.9926	-45.7032	-73.8115	-70.165	-56.181	-76.8392	-35.6845	-54.2944	-42.5749	-48.792	-36.0454	-56.1079	-47.1339	-24.0605	-35.8033	-75.8053	-48.5834	-47.3857	-53.6403	-45.0916	-70.6305	-48.5445	-37.8662	-58.6711	-35.4443	-44.9107	-54.7489	-54.0557	-53.3835	-36.7755	-39.141	-46.8543	-17.4367	-61.8002	-42.9902	-57.7075	-33.0832	-49.8017	-60.4553	-33.8763	-63.726	-0.690138	-30.3779
Coxiella burnetii RSA 493	-74.9046	-113.907	-109.772	-76.678	-126.939	-114.512	-132.328	-80.5274	-128.406	-127.113	-107.147	-104.585	-58.5736	-125.067	-65.1367	-105.934	-118.526	-76.4336	-58.3664	-50.8525	-48.9535	-123.089	-46.4482	-94.4484	-81.0058	-84.6036	-107.301	-127.143	-76.4812	-118.101	-64.2942	-74.7337	-72.1394	-68.8482	-69.026	-81.6125	-127.175	-123.618	-100.477	-78.4596	-69.7172	-104.668	-102.26	-61.6342	-73.1864	-70.9854	-99.8636	-76.7489	-69.8077
Streptomyces avermitilis MA-4680	-40.821	-83.3706	-63.195	-55.6714	-79.7037	-80.6324	-129.116	-61.3265	-123.105	-93.9753	-84.2071	-104.494	-43.0711	-120.832	-49.8592	-66.1872	-81.1756	-48.2028	-53.4855	-37.9712	-43.6322	-113.497	-50.1459	-62.8589	-51.0033	-67.209	-99.607	-96.3079	-59.354	-107.451	-49.4892	-64.152	-47.0119	-33.805	-53.7524	-35.3177	-92.2434	-99.8932	-95.171	-55.699	-44.6636	-87.3618	-61.7911	-45.0812	-60.2142	-44.9579	-94.3638	-42.264	-49.8773
Chlamydophila caviae GPIC	-76.641	-103.845	-97.7235	-87.4552	-94.4837	-94.8667	-123.585	-68.2914	-121.598	-107.043	-80.5128	-95.1809	-74.6473	-122.452	-63.9549	-112.322	-98.1161	-102.877	-91.2491	-66.0809	-68.7246	-97.9331	-85.2846	-68.6233	-78.1579	-93.9786	-90.5572	-103.866	-91.0065	-86.9646	-79.6169	-84.2871	-86.8818	-83.3321	-90.4609	-68.4048	-88.2906	-78.723	-72.9874	-94.3517	-64.7523	-75.0203	-77.7896	-65.2065	-76.768	-62.7207	-86.1515	-78.8088	-69.4913
Hyphomonas neptunium ATCC 15444	-64.8152	-135.586	-121.628	-102.299	-130.04	-109.324	-154.054	-93.9085	-147.811	-133.275	-120.173	-129.962	-63.8475	-155.693	-72.177	-95.1664	-118.985	-92.4353	-76.5805	-75.393	-75.0107	-150.813	-81.1421	-104.33	-107.961	-75.7883	-111.534	-137.098	-85.3874	-126.456	-107.018	-105.53	-102.691	-76.2564	-93.0704	-85.6344	-135.321	-120.479	-109.1	-106.978	-88.4075	-124.825	-111.629	-59.5081	-96.875	-80.6834	-119.08	-68.8449	-86.8176
Nitrosomonas europaea ATCC 19718	-58.1927	-137.447	-119.191	-79.4092	-133.408	-99.2069	-111.834	-83.4179	-98.2727	-135.441	-87.7837	-66.6766	-65.139	-121.478	-79.1967	-99.9781	-114.199	-96.194	-75.9152	-83.778	-67.1064	-117.152	-79.8168	-84.775	-93.622	-78.7026	-97.8051	-112.668	-84.6701	-96.7269	-89.2493	-98.3823	-83.5104	-78.86	-94.5672	-91.3192	-103.436	-94.9186	-92.6251	-81.5409	-76.3245	-85.7841	-99.4369	-49.4078	-90.0835	-76.1817	-95.0187	-63.3775	-89.2014
Acidovorax sp. JS42	-82.5032	-115.962	-105.411	-67.5628	-113.552	-105.922	-142.17	-83.1512	-118.595	-113.214	-94.1101	-104.72	-79.7665	-145.831	-60.1518	-84.7892	-111.825	-90.5583	-78.2699	-71.9487	-76.8754	-122.611	-65.6741	-88.8147	-78.5989	-67.4464	-89.0868	-116.044	-79.121	-128.721	-70.7893	-70.4822	-69.3225	-83.6244	-96.0343	-79.6494	-105.973	-97.8598	-86.4375	-67.5694	-69.5931	-100.766	-96.8931	-66.8972	-68.3733	-71.6153	-111.274	-86.0716	-70.1054
Mycoplasma gallisepticum R	-74.8978	-107.355	-94.2248	-93.4521	-104.781	-101.867	-133.554	-83.4324	-120.898	-119.981	-102.119	-112.833	-79.1759	-120.383	-77.1059	-109.246	-94.7961	-98.2483	-92.4433	-76.2199	-77.6385	-119.908	-89.0976	-78.9535	-93.6455	-99.8885	-101.418	-105.476	-93.1433	-117.942	-70.7932	-84.1979	-90.6041	-90.9039	-91.8517	-62.5675	-105.971	-105.005	-95.0918	-92.7123	-68.5409	-98.8832	-93.1752	-85.9743	-86.9726	-75.3787	-105.831	-75.3615	-58.5074
Haemophilus ducreyi 35000HP	-94.1278	-118.263	-117.139	-112.086	-136.971	-124.39	-168.493	-108.148	-169.674	-148.251	-117.201	-135.009	-104.541	-170.557	-93.2239	-133.427	-124.995	-126.865	-115.687	-100.295	-98.2455	-140.754	-114.682	-104.77	-112.494	-119.828	-135.944	-142.792	-117.893	-127.008	-92.4034	-106.302	-114.067	-112.895	-114.027	-84.3415	-120.776	-114.744	-102.91	-116.397	-79.1022	-112.331	-110.78	-90.685	-108.412	-84.5799	-121.125	-93.9145	-84.8306
Mycobacterium bovis AF2122/97	-98.2229	-115.448	-106.026	-102.39	-125.993	-100.657	-165.899	-81.9118	-172.082	-130.538	-101.988	-141.84	-53.2897	-150.22	-71.9609	-119.771	-118.133	-52.9364	-63.8281	-60.8585	-56.0418	-153.087	-61.9487	-84.2113	-98.2922	-94.5302	-112.523	-145.782	-94.8095	-140.334	-89.6562	-108.054	-100.019	-71.0314	-52.8829	-85.4497	-137.372	-140.333	-120.283	-99.2564	-71.0139	-106.656	-104.058	-45.657	-96.4457	-73.1515	-127.22	-100.602	-69.1449
Solibacter usitatus Ellin6076	-61.6185	-45.6547	-32.5007	-25.1883	-47.0239	-42.8819	-90.8229	-30.4977	-90.7032	-50.5337	-67.354	-59.7363	-38.9226	-78.4446	-38.5106	-92.9995	-38.5111	-49.6386	-40.6155	-19.8869	-37.4444	-57.816	-37.3206	-46.0619	-28.5505	-100.266	-45.8873	-41.8916	-103.362	-47.7803	-42.983	-6.44368	-28.4051	-1.46542	-33.7295	-12.6252	-74.3605	-76.0102	-53.3373	-31.2741	-31.9998	-56.4853	-45.9887	-30.6213	-28.5511	-29.1332	-30.7983	-59.1092	-15.1399
Anaplasma marginale str. St. Maries	-36.1204	-72.0871	-62.6842	-55.3521	-75.6308	-53.9469	-90.6948	-43.5493	-84.3522	-83.4408	-50.8654	-60.7069	-43.707	-81.8591	-54.0119	-57.1783	-75.4626	-68.0213	-49.7501	-47.4825	-46.0363	-79.9856	-51.044	-43.7504	-58.0016	-40.7295	-52.8475	-69.7173	-44.0893	-71.9661	-66.4536	-66.5687	-57.6903	-51.1615	-55.0682	-58.817	-61.0077	-58.381	-44.3951	-58.2553	-54.2703	-54.8374	-46.9295	-28.3524	-53.9808	-39.9344	-66.6079	-38.1767	-46.0518
Helicobacter hepaticus ATCC 51449	-93.6262	-111.5	-101.793	-87.9394	-109.592	-88.0052	-122.002	-67.4737	-109.858	-110.811	-77.5494	-94.763	-81.7444	-112.669	-91.8834	-107.431	-106.913	-103.921	-86.6693	-74.7292	-77.8564	-114.431	-94.7747	-68.8352	-85.2528	-91.7347	-98.8546	-109.335	-88.3717	-106.195	-92.8223	-88.7331	-77.2804	-81.9887	-87.3912	-100.009	-84.0778	-88.4137	-81.0589	-82.6186	-67.1897	-65.1531	-68.8011	-56.7733	-74.2657	-50.763	-88.72	-95.4826	-83.1435
Geobacillus kaustophilus HTA426	27.9223	-35.1682	-33.155	-11.1653	-23.6305	-61.8565	-67.3844	-34.214	-67.9955	-40.2574	-46.465	-58.653	-4.91231	-66.9043	-3.99615	30.7539	-25.5884	13.1444	6.19767	-6.35844	6.05903	-62.6366	8.58603	-45.7247	-13.8477	25.6439	-60.1291	-49.2244	11.1704	-59.2359	-10.6413	-30.0703	-27.3972	-10.1762	-2.26062	-14.0955	-37.742	-44.8788	-50.6234	-4.85622	-7.94168	-57.1211	-35.0776	-24.3756	-26.5127	-21.0311	-61.9687	28.8626	-15.2339
Anabaena variabilis ATCC 29413	-45.6006	-73.0949	-74.5554	-59.3842	-64.9758	-29.02	-46.7607	-38.5234	-43.9008	-89.8119	-32.8638	-43.5775	-63.6911	-45.434	-54.3831	-82.3337	-75.9953	-95.7723	-80.3736	-76.0263	-71.3633	-48.0477	-84.111	-21.4246	-73.1367	-68.9058	-32.3468	-59.4825	-28.2403	-67.9031	-42.24	-61.6672	-54.2685	-69.0306	-76.0629	-52.56	-61.964	-49.6509	-53.6976	-57.3916	-47.0857	-27.3305	-38.2297	-30.2802	-49.6149	-41.8497	-45.6433	-48.1813	-45.9282
Neisseria gonorrhoeae FA 1090	-78.8889	-127.746	-121.581	-92.0092	-124.096	-105.815	-150.357	-79.7911	-132.186	-140.792	-92.7025	-93.6342	-63.501	-144.651	-80.7054	-105.36	-111.302	-99.1682	-95.0443	-79.1549	-75.3833	-126.099	-84.2824	-75.0729	-89.2665	-83.906	-106.99	-119.536	-83.4353	-117.756	-105.594	-105.482	-78.7342	-87.5455	-94.0396	-90.1424	-109.521	-100.373	-78.2613	-90.2431	-79.6991	-102.687	-90.7213	-62.3152	-72.4254	-71.4278	-116.346	-79.8047	-92.9941
Porphyromonas gingivalis W83	-99.9961	-121.662	-112.26	-126.726	-122.828	-119.046	-149.53	-105.834	-138.108	-144.131	-113.45	-123.649	-95.4291	-134.101	-109.04	-153.779	-119.828	-135.005	-121.52	-87.0489	-80.2068	-133.527	-119.658	-88.7338	-130.023	-142.619	-121.976	-155.267	-134.955	-134.985	-108.701	-112.18	-115.91	-118.629	-121.318	-98.7199	-122.602	-114.806	-123.209	-124.28	-100.999	-119.158	-101.889	-93.4111	-113.817	-105.926	-125.23	-99.8679	-79.7785
Rhodopirellula baltica SH 1	-131.793	-137.669	-123.439	-140.367	-131.919	-112.018	-159.328	-59.9151	-151.59	-175.566	-99.8566	-121.887	-144.929	-150.283	-132.223	-188.622	-125.347	-182.618	-155.657	-143.684	-133.598	-162.696	-156.203	-97.3681	-137.622	-157.525	-116.914	-145.832	-153.8	-136.627	-110.256	-116.428	-127.024	-120.145	-162.297	-92.5526	-121.955	-116.605	-112.752	-135.25	-93.8179	-97.066	-116.308	-81.7147	-119.37	-86.5298	-140.269	-134.117	-89.2233
Acidithiobacillus ferrooxidans ATCC 23270	-113.225	-118.381	-106.237	-93.1182	-122.731	-75.687	-121.298	-66.9938	-103.698	-139.673	-77.3272	-95.2904	-49.6976	-110.228	-78.803	-158.784	-104.629	-70.5178	-53.7812	-57.4823	-45.4314	-121.621	-58.8035	-75.2933	-102.583	-124.798	-85.1694	-95.7078	-121.859	-110.85	-78.8146	-87.9637	-95.2819	-85.6206	-50.52	-76.1821	-81.8208	-90.2517	-84.5102	-96.7475	-67.1334	-71.9005	-87.9307	-80.3901	-80.2163	-63.3206	-81.383	-114.949	-71.8656
Burkholderia mallei ATCC 23344	-71.8784	-109.239	-91.6043	-72.8433	-96.9928	-103.51	-131.797	-76.1547	-137.06	-113.734	-94.7201	-100.63	-50.4405	-121.508	-70.1062	-90.0064	-97.74	-61.2328	-54.1371	-54.8863	-49.8693	-120.259	-58.4017	-79.6856	-65.3261	-88.616	-93.4649	-107.899	-84.6915	-110.143	-63.6305	-74.732	-64.0657	-68.4569	-60.7107	-69.6	-105.555	-95.2892	-89.5532	-64.4344	-55.6054	-96.2791	-95.2995	-68.502	-64.0054	-65.2187	-89.7557	-75.0754	-61.3522
Chlamydia muridarum Nigg	-78.2742	-97.5377	-92.4671	-79.7565	-92.0333	-94.9699	-119.707	-73.0302	-114.793	-108.88	-83.8704	-94.4527	-71.1584	-116.091	-64.0993	-112.261	-92.908	-100.847	-91.8096	-68.1055	-68.6098	-93.4015	-83.2901	-65.5327	-73.3588	-94.4222	-96.0017	-102.873	-95.9768	-85.303	-73.3497	-76.2709	-68.0409	-74.4677	-90.2293	-68.1407	-90.6091	-85.9348	-70.6641	-80.6303	-58.6714	-82.1521	-74.0539	-57.8971	-69.6212	-64.3097	-93.1607	-78.2497	-68.4774
Dehalococcoides ethenogenes 195	-31.7219	-17.0393	-33.4531	-20.8427	-13.3596	30.1835	41.9879	16.3901	43.6137	24.6514	10.6525	26.3242	-29.0877	32.6324	-19.088	-51.1801	-16.1228	-31.7996	-17.5345	-17.4498	-18.2002	33.3102	-26.502	18.448	-18.3503	-24.3271	40.7475	55.8331	-36.6513	32.7273	-9.2369	-4.05442	2.76548	-24.3948	-11.5239	-4.79274	7.60336	10.1022	28.1211	-18.7551	-4.25392	3.85042	17.4031	0.803468	-1.89777	-1.31795	36.8498	-30.4459	-7.58762
Deinococcus radiodurans R1	-14.1281	-70.8531	-60.6486	-41.7571	-69.21	-93.1242	-107.293	-69.2577	-113.594	-81.404	-90.5919	-99.864	-29.4422	-113.148	-2.37888	-32.1984	-67.1054	-32.4789	-34.6198	-33.1459	-25.0782	-113.288	-16.6735	-75.6319	-27.2323	-29.9051	-104.652	-84.5565	-37.8749	-103.477	-64.261	-53.3874	-41.8157	-44.2798	-27.3488	-44.5266	-105.197	-104.609	-100.948	-41.3852	-40.5273	-90.1721	-97.3119	-48.0215	-45.7059	-41.6097	-93.0676	-18.8687	-41.18
Geobacter sulfurreducens PCA	-45.5876	-27.5433	-40.688	-25.7637	-35.9819	11.6315	39.3054	-1.35705	32.293	-4.53254	3.35785	32.2809	-37.9745	24.4596	-42.7351	-66.5202	-33.9083	-37.9474	-47.4365	-31.6988	-23.3757	47.6619	-44.9112	-0.619237	-28.3916	-43.0268	19.5318	44.9011	-62.8478	23.9405	-22.9182	-5.5654	-30.4367	-46.6337	-27.9779	-40.817	23.4412	15.2461	7.8403	-25.4255	-22.4618	18.7131	12.1792	-13.9746	-20.7402	-16.0586	26.503	-41.566	-27.0786
Methylococcus capsulatus str. Bath	-67.0053	-72.3564	-73.9012	-56.5299	-66.6326	-38.0155	-65.9822	-21.1241	-62.3837	-81.1093	-34.4038	-38.1492	-43.1425	-66.651	-51.9474	-85.5639	-70.6003	-59.8621	-38.3188	-52.7802	-39.8777	-66.5297	-47.0352	-38.6186	-57.9013	-72.5437	-41.0378	-46.8959	-65.5328	-59.2142	-49.2478	-57.5042	-63.7305	-70.8797	-52.121	-61.6104	-46.6926	-52.3298	-52.8101	-61.2008	-38.0669	-42.8908	-41.8112	-29.9036	-57.0998	-50.2188	-52.2241	-71.5687	-50.5949
Mycobacterium avium 104	-97.3668	-126.737	-111.113	-109.793	-124.51	-106.949	-178.173	-83.3913	-173.246	-129.78	-111.919	-137.155	-67.8271	-163.709	-85.1616	-136.902	-126.302	-81.3082	-70.8413	-77.2392	-66.1216	-160.93	-65.1847	-78.988	-100.32	-107.535	-116.969	-141.039	-107.48	-156.805	-82.4062	-109.24	-98.7902	-70.5701	-70.28	-90.1045	-131.811	-126.536	-131.938	-98.4494	-74.2	-109.465	-94.6389	-62.4894	-98.6303	-80.5028	-128.606	-99.6258	-81.7929
Photorhabdus luminescens subsp. laumondii TTO1	-92.9792	-110.209	-111.56	-102.054	-119.898	-108.714	-160.27	-86.192	-157.277	-155.55	-99.9003	-103.45	-86.0198	-163.662	-89.9775	-137.754	-114.47	-113.234	-106.533	-90.6505	-89.9984	-117.498	-98.493	-93.4497	-108.372	-125.043	-113.408	-144.31	-126.646	-122.433	-85.5902	-101.68	-101.159	-101.071	-101.585	-74.596	-106.466	-92.244	-90.9494	-103.412	-67.2413	-95.5037	-95.9018	-74.58	-89.487	-70.0597	-118.315	-95.9441	-65.595
Thermotoga maritima MSB8	2.08266	81.1241	93.4731	39.4794	103.069	6.55661	3.30318	14.7442	-6.69271	29.8814	13.9529	3.22839	1.61836	9.59054	38.2129	2.7664	83.582	16.6411	16.7766	21.4489	13.338	-7.3363	16.6863	-5.34126	35.1571	-12.7681	11.7457	0.667574	-8.55639	-2.25592	59.1361	58.52	39.0621	39.3545	10.0938	64.8664	-5.26105	10.336	-15.4414	32.7361	46.7336	-1.5987	-4.21059	-31.4311	35.038	23.3499	-10.9287	-0.766076	49.6937
Treponema denticola ATCC 35405	-161.716	-149.299	-134.778	-162.036	-166.481	-174.345	-205.154	-135.522	-198.638	-194.458	-138.629	-185.676	-148.797	-208.575	-114.454	-234.138	-140.626	-176.386	-162.063	-127.435	-124.652	-159.019	-158.468	-143.027	-163.329	-207.082	-172.861	-192.755	-190.106	-183.286	-102.12	-125.237	-153.317	-147.325	-159.867	-83.5008	-171.438	-163.336	-138.057	-152.813	-100.43	-155.985	-149.705	-136.577	-148.136	-133.421	-164.876	-163.127	-59.8078
Treponema pallidum subsp. pallidum str. Nichols	-95.7473	-103.684	-102.075	-112.317	-120.385	-105.276	-145.549	-96.5562	-128.22	-135.722	-99.3556	-100.957	-113.381	-135.273	-96.1392	-134.299	-106.846	-129.086	-122.266	-103.594	-100.292	-121.949	-123.175	-94.5276	-112.04	-123.49	-110.85	-116.895	-109.322	-108.972	-85.8847	-99.9716	-106.792	-113.192	-120.443	-74.3963	-99.4868	-96.9424	-111.246	-108.186	-72.694	-100.622	-94.213	-97.9185	-105.479	-92.9496	-114.854	-95.9697	-68.4057
Chromobacterium violaceum ATCC 12472	-57.386	-77.192	-75.5696	-71.4239	-85.8297	-83.9191	-113.918	-81.2296	-109.621	-110.521	-98.0651	-84.228	-57.9788	-109.938	-61.1331	-91.393	-81.2479	-70.9487	-85.4688	-57.8503	-61.4998	-94.7162	-74.1518	-73.2087	-71.5983	-73.9069	-80.3577	-94.8505	-72.026	-89.7241	-71.7477	-67.671	-62.3457	-80.9432	-80.9003	-60.6826	-79.3173	-85.1437	-76.3046	-67.5946	-57.9853	-86.6993	-82.4875	-66.8453	-55.0316	-70.9029	-82.9418	-58.1491	-57.9078
Carboxydothermus hydrogenoformans Z-2901	-22.8117	10.3385	6.90681	-5.43057	6.25004	41.9633	19.3428	16.9596	28.9512	76.206	30.1164	7.32491	-4.63195	12.3313	-2.85768	-46.1268	4.86147	-4.53352	5.81689	12.8313	23.547	32.8533	-6.34525	29.3899	9.32324	-25.3769	26.8755	33.2734	-27.2916	17.0213	-8.6447	26.5734	21.4208	-20.7516	6.05975	-7.83338	27.6955	24.5443	15.3637	9.65345	20.672	18.9055	29.1707	-12.1581	17.242	17.1648	13.6501	-25.1101	9.5913
Dichelobacter nodosus VCS1703A	-58.8229	-88.9288	-90.7358	-90.9974	-94.2958	-89.7744	-113.203	-70.1582	-108.358	-119.69	-85.1663	-86.8497	-65.4611	-111.153	-71.8037	-101.063	-89.2366	-84.5224	-82.188	-70.3387	-66.5267	-92.3653	-82.4142	-59.5245	-85.7102	-73.9473	-91.5464	-91.6219	-83.9439	-83.4732	-66.4368	-83.6526	-77.7193	-78.1706	-89.5014	-76.365	-78.3711	-78.7166	-76.242	-88.2117	-70.4966	-79.0739	-65.6981	-55.1912	-84.2412	-66.0333	-91.0019	-62.3521	-63.8182
Mycobacterium smegmatis str. MC2 155	-46.6272	-66.2929	-67.9566	-67.7153	-70.4021	-70.8142	-103.664	-67.1499	-112.485	-86.6975	-86.2131	-103.653	-36.6221	-111.122	-41.9389	-72.434	-71.7238	-27.5318	-35.0354	-27.1561	-37.5464	-113.069	-23.342	-52.4428	-56.8157	-52.0273	-79.5474	-93.8151	-44.5896	-103.962	-43.8077	-65.9978	-59.0271	-37.8038	-29.3716	-57.0378	-95.3815	-90.0372	-87.8901	-56.3153	-51.111	-90.5173	-47.3726	-44.9289	-58.6692	-51.7062	-99.0437	-45.7164	-40.926
Myxococcus xanthus DK 1622	-34.8302	-70.6818	-58.4528	-55.3903	-61.933	-73.0285	-82.3601	-60.9223	-83.6172	-91.5912	-60.8627	-63.898	-60.9675	-65.3112	-39.2519	-84.704	-79.362	-107.682	-90.7081	-51.7253	-49.6348	-74.7108	-77.2557	-65.3767	-57.6468	-55.5732	-51.9261	-34.8587	-63.8463	-52.642	-60.2782	-58.4413	-68.0414	-68.1745	-83.3411	-31.5662	-71.9597	-75.6103	-58.7592	-68.2757	-31.8331	-60.0711	-78.3161	-46.7393	-57.3848	-51.5373	-75.289	-35.1561	-26.235
Silicibacter pomeroyi DSS-3	-63.8641	-117.871	-110.286	-60.1178	-113.48	-103.738	-149.491	-73.5929	-142.628	-102.951	-104.504	-105.748	-65.8481	-156.898	-42.7426	-50.0104	-113.809	-70.4932	-62.7372	-76.8991	-81.7192	-139.88	-59.2517	-92.3859	-67.2078	-62.4351	-108.013	-124.987	-46.8853	-138.946	-85.9733	-66.3704	-80.5439	-81.3553	-67.3755	-67.4682	-109.53	-103.391	-103.204	-61.1863	-54.5557	-113.152	-95.5468	-55.4843	-67.4497	-64.1414	-124.761	-67.5086	-59.8325
Nocardia farcinica IFM 10152	-75.6529	-106.068	-97.5809	-97.3116	-113.006	-96.8713	-142.494	-79.0025	-132.236	-118.915	-95.2607	-115.542	-64.6573	-130.799	-66.6389	-104.614	-109.121	-74.3984	-68.1138	-60.0103	-68.0853	-122.302	-59.0222	-68.0257	-94.1659	-55.8837	-106.324	-103.736	-87.9727	-114.16	-90.8971	-89.678	-89.7198	-62.3663	-60.4341	-71.604	-112.412	-106.087	-98.3911	-79.4862	-60.3047	-112.686	-76.8813	-48.3006	-89.8539	-54.409	-114.306	-78.3803	-68.8313
Gloeobacter violaceus PCC 7421	-74.8839	-111.376	-109.749	-76.7487	-102.018	-80.0829	-98.3986	-61.3176	-84.0407	-122.882	-70.1421	-81.4321	-75.4241	-84.3638	-64.4729	-111.304	-112.449	-95.5865	-74.0016	-70.2718	-68.8961	-85.9704	-85.7088	-65.3223	-84.9353	-103.54	-54.5444	-92.2518	-75.6132	-87.971	-70.9995	-70.8527	-65.5985	-81.3097	-84.4019	-68.8536	-91.4245	-91.2463	-92.4561	-82.9347	-58.1868	-67.774	-78.6172	-38.1785	-69.253	-66.0085	-83.2466	-75.6643	-71.059
Corynebacterium diphtheriae NCTC 13129	-71.0986	-111.028	-113.809	-85.5228	-119.789	-97.2874	-135.324	-88.4475	-131.095	-130.674	-108.861	-113.653	-64.9238	-130.692	-81.3536	-88.4198	-111.311	-87.7648	-68.779	-71.0623	-65.3951	-126.892	-59.3841	-75.0328	-83.7258	-76.0273	-101.284	-99.5249	-64.3694	-116.558	-80.9672	-104.839	-88.7482	-72.2813	-65.2259	-84.0792	-117.011	-105.98	-105.392	-81.0154	-73.4858	-113.521	-88.9425	-48.9552	-89.7895	-78.3499	-131.054	-73.1615	-77.3474
Bordetella bronchiseptica RB50	-71.3988	-114.077	-91.4399	-80.5366	-106.825	-123.368	-147.352	-83.0781	-136.676	-95.3962	-102.655	-112.459	-68.9954	-130.119	-58.7673	-69.0782	-98.5579	-81.5691	-84.5914	-68.4533	-72.4679	-132.041	-66.8307	-87.5875	-79.0055	-60.9984	-120.301	-123.53	-90.1161	-122.928	-76.3814	-77.5676	-73.8315	-100.099	-74.2071	-80.4374	-119.471	-100.208	-100.428	-82.1074	-59.4136	-114.218	-95.1891	-63.1837	-80.8032	-71.1265	-102.48	-70.5761	-65.21
Bordetella parapertussis 12822	-70.2469	-113.25	-96.6882	-83.0534	-112.846	-121.181	-147.903	-88.2917	-138.238	-100.763	-106.236	-120.047	-70.4208	-134.484	-55.652	-59.1141	-94.1365	-72.4786	-75.0443	-68.5608	-74.4546	-138.014	-58.483	-89.9964	-74.1063	-53.3871	-117.381	-122.659	-74.9908	-131.11	-73.1618	-79.7635	-68.7085	-95.1694	-68.77	-80.9078	-117.151	-106.03	-101.682	-81.079	-60.8967	-117.889	-91.1011	-63.3976	-76.7138	-70.7824	-96.7448	-67.839	-67.335
Bordetella pertussis Tohama I	-61.2464	-124.382	-101.543	-81.528	-116.818	-124.22	-158.332	-90.2712	-143.383	-103.265	-106.559	-113.526	-59.6882	-135.209	-52.5147	-68.9642	-109.742	-57.5684	-70.1094	-63.4403	-68.126	-144.11	-50.571	-94.5085	-75.1508	-49.6043	-117.303	-125.791	-63.4594	-123.843	-71.7499	-84.4165	-74.2437	-89.3852	-68.6582	-80.6914	-126.44	-110.641	-104.014	-76.1875	-65.3166	-118.203	-93.6952	-63.7394	-81.5653	-74.9616	-109.253	-59.2171	-67.9649
Lactobacillus johnsonii NCC 533	-114.143	-144.241	-124.694	-142.373	-155.21	-148.947	-181.582	-118.516	-182.885	-176.362	-158.655	-167.326	-107.368	-180.393	-106.36	-158.399	-136.074	-116.912	-118.028	-104.945	-110.018	-175.669	-112.088	-124.985	-137.716	-143.431	-147.679	-148.891	-134.551	-163.931	-72.7334	-115.684	-132.951	-112.668	-122.624	-86.1822	-161.18	-157.731	-131.822	-141.26	-93.2123	-153.093	-128.639	-125.455	-126.059	-108.154	-147.946	-110.975	-81.4379
Rickettsia typhi str. Wilmington	-54.8438	-81.0167	-68.2698	-64.7799	-87.4506	-65.6323	-96.2019	-55.6399	-93.1572	-90.0329	-74.7939	-77.7492	-52.1131	-95.0851	-57.2761	-85.6666	-78.1998	-73.4806	-63.9145	-55.2638	-50.697	-97.9981	-68.8093	-60.8577	-65.2569	-69.1104	-73.9014	-88.6422	-73.998	-81.6442	-64.0326	-62.0152	-60.9773	-57.1561	-66.6209	-67.8155	-74.7586	-67.9752	-65.8796	-63.5093	-55.5143	-71.6861	-56.0625	-50.1398	-65.1956	-56.5406	-73.7278	-53.6394	-57.3696
Psychrobacter arcticus 273-4	-59.4993	-114.889	-123.767	-77.5623	-116.439	-104.588	-131.224	-87.3751	-132.132	-120.926	-108.584	-100.996	-56.9238	-133.133	-72.4217	-79.3984	-113.803	-71.9779	-65.04	-61.4242	-50.7158	-121.23	-55.4272	-76.2241	-81.7852	-49.2543	-100.108	-110.57	-64.7972	-125.953	-103.316	-96.7	-77.6562	-79.7068	-68.2554	-88.248	-91.3986	-105.838	-93.3535	-82.4379	-74.1715	-98.8906	-84.4528	-56.4466	-80.0672	-69.5947	-102.928	-64.4755	-82.8409
Exiguobacterium sibiricum 255-15	-17.9726	-75.0145	-66.3223	-65.6634	-85.3154	-111.561	-107.332	-80.0833	-100.414	-113.563	-101.39	-97.1825	-50.5653	-112.77	-51.8275	-35.0973	-80.2517	-61.9398	-64.0235	-38.9234	-41.9778	-120.867	-45.8354	-79.8452	-59.0624	-58.1565	-100.731	-96.7608	-53.8468	-85.3981	-54.7199	-81.9661	-71.5374	-56.0517	-67.8121	-49.7711	-93.0793	-93.6473	-69.3691	-75.3151	-58.3846	-94.9078	-75.1829	-56.9992	-75.7699	-59.2475	-90.5616	-16.585	-38.6599
Brucella abortus biovar 1 str. 9-941	-47.3528	-115.856	-105.911	-57.0786	-121.184	-112.272	-133.113	-86.1345	-122.829	-106.336	-104.46	-108.433	-48.3351	-122.28	-62.9741	-54.3109	-117.095	-64.4797	-61.1259	-51.3804	-48.3804	-138.466	-62.0501	-94.1913	-52.5119	-49.2828	-100.611	-121.991	-38.6326	-130.83	-65.394	-74.6006	-69.5723	-66.5229	-63.8914	-75.0803	-117.591	-110.084	-90.0913	-58.7151	-69.8753	-100.01	-98.6921	-54.3772	-73.6454	-80.384	-112.186	-45.0239	-65.8588
Mycoplasma synoviae 53	-80.9875	-95.6582	-91.8164	-82.8864	-98.1244	-107.304	-124.652	-79.501	-119.848	-123.911	-102.176	-112.366	-78.9022	-117.147	-74.8109	-101.154	-95.4182	-95.4136	-89.0974	-78.5918	-78.076	-116.708	-90.2798	-85.1802	-85.8545	-95.261	-99.9649	-103.612	-91.6473	-117.284	-64.6789	-83.7927	-85.0865	-83.5254	-88.1034	-63.9706	-108.425	-99.3535	-96.15	-87.7127	-65.1	-100.391	-96.2944	-87.3913	-82.2342	-76.7266	-107.752	-81.2198	-55.1781
Thermus thermophilus HB27	47.8991	11.9	13.3184	88.4025	20.2197	-34.5339	-39.9869	-21.7386	-36.2144	3.94846	-24.7161	-52.7443	49.0442	-50.5809	80.7883	78.3808	17.3847	71.9318	63.4906	44.3671	46.0459	-37.5732	72.9772	-44.6519	71.1947	79.8473	-22.3336	-17.0348	31.0254	-42.6501	11.6537	11.3328	37.8172	28.5023	55.1309	14.2045	-44.9479	-43.0998	-40.5103	73.7642	28.9956	-41.241	-45.2923	21.7977	43.6241	19.2559	-32.3031	44.8729	4.80524
Onion yellows phytoplasma OY-M	-107.309	-118.824	-105.888	-105.716	-116.242	-110.859	-149.316	-92.294	-141.308	-137.904	-110.039	-123.821	-97.6557	-145.888	-82.1581	-138.545	-112.5	-118.336	-111.335	-92.7798	-91.189	-144.198	-109.785	-91.2061	-100.991	-124.61	-119.35	-125.374	-114.79	-138.407	-81.1483	-92.0343	-98.8659	-103.448	-111.535	-83.3646	-116.158	-122.238	-115.829	-102.123	-73.2695	-108.597	-99.9123	-104.219	-96.9281	-85.5139	-124.406	-107.863	-73.2013
Candidatus Protochlamydia amoebophila UWE25	-123.566	-174.105	-153.43	-135.181	-183.507	-177.08	-205.88	-136.506	-202.48	-195.369	-163.77	-178.559	-125.627	-206.083	-107.404	-177.878	-167.489	-163.635	-142.311	-117.99	-119.236	-185.211	-143.584	-148.192	-136.428	-158.013	-159.336	-184.595	-142.296	-171.629	-114.049	-127.334	-135.755	-135.613	-143.364	-100.448	-174.092	-171.839	-166.609	-134.322	-106.093	-154.837	-160.988	-110.377	-132.378	-129.025	-171.046	-126.496	-109.235
Chlamydophila felis Fe/C-56	-77.7	-98.0895	-94.8487	-77.4523	-94.7438	-88.9986	-121.122	-65.1252	-121.047	-107.251	-73.49	-92.4031	-71.6139	-118.951	-59.78	-107.606	-94.336	-105.967	-90.29	-72.9927	-66.6501	-92.2184	-87.292	-67.6206	-77.1607	-88.1416	-87.6592	-101.16	-88.12	-84.2501	-77.466	-84.2365	-76.8915	-85.3312	-90.4914	-70.1803	-82.3585	-77.7976	-69.0785	-86.3432	-61.5143	-69.9344	-72.9221	-65.1659	-70.7248	-61.5492	-83.3621	-78.8823	-65.2467
Zymomonas mobilis subsp. mobilis ZM4	-82.5162	-129.415	-129.321	-100.706	-141.757	-113.497	-129.865	-90.5493	-124.725	-136.432	-106.41	-104.224	-71.2049	-135.171	-88.4686	-103.871	-131.995	-98.8251	-82.7287	-77.8993	-79.1251	-122.663	-83.9622	-92.7744	-97.9647	-86.4736	-120.661	-118.108	-87.0372	-112.353	-113.391	-109.222	-92.4515	-83.257	-87.7159	-102.96	-120.158	-108.025	-103.932	-100.953	-91.5042	-111.383	-102.402	-59.0274	-87.152	-78.2032	-96.9681	-84.43	-92.8203
Bdellovibrio bacteriovorus HD100	-109.732	-147.921	-128.84	-113.298	-158.395	-151.545	-219.119	-116.607	-189.538	-180.54	-143.839	-162.545	-110.311	-203.481	-92.0717	-178.986	-144.371	-157.728	-133.411	-108.629	-99.164	-179.701	-134.089	-126.232	-117.007	-145.413	-153.899	-178.692	-145.722	-159.246	-103.459	-116.772	-120.317	-134.381	-139.825	-91.697	-169.28	-167.391	-151.297	-117.006	-77.6395	-144.499	-143.655	-102.51	-128.342	-112.48	-160.124	-110.832	-75.7764
Moorella thermoacetica ATCC 39073	-32.333	6.45406	5.72882	11.4838	-2.50831	52.6992	77.9944	30.5176	79.5693	61.4339	40.1442	56.1999	-6.251	81.3581	-10.2847	-35.1759	2.70599	4.67073	-3.03688	1.12477	11.7967	68.712	12.0583	33.1437	9.27063	-36.8695	66.0948	60.1842	-29.8231	50.147	14.6789	31.5356	25.3945	20.0353	16.3094	15.6201	46.4679	33.9898	38.2784	11.3552	8.6086	35.1407	35.4744	-27.5109	27.8265	5.75406	41.8555	-30.5192	8.74184
Methylobacillus flagellatus KT	-77.9038	-115.8	-105.36	-90.4379	-115.974	-77.8765	-95.2064	-63.2188	-85.7744	-113.766	-84.3064	-67.058	-60.1414	-85.6835	-74.943	-101.939	-112.138	-82.5703	-77.3389	-75.8603	-72.0841	-98.3201	-65.7214	-57.6417	-93.7261	-70.1023	-77.3525	-95.9407	-62.2077	-94.6362	-87.7133	-90.8075	-84.8004	-89.7268	-73.1406	-72.1705	-81.9923	-76.913	-67.5799	-92.2262	-65.0588	-71.6501	-78.2777	-66.9939	-77.6534	-64.1056	-78.2005	-81.3037	-71.5024
Mesoplasma florum L1	-64.6594	-87.2	-81.64	-71.441	-83.6489	-95.4597	-112.311	-69.7676	-114.213	-106.969	-88.4282	-95.4759	-62.7312	-113.569	-63.3114	-91.5835	-84.2116	-79.796	-77.3085	-62.5695	-69.0238	-107.071	-73.3034	-74.7208	-69.4912	-81.1751	-94.0882	-95.5771	-69.5239	-101.81	-58.4753	-71.927	-74.6172	-69.3816	-84.0931	-56.216	-89.8782	-91.8417	-89.0914	-75.4294	-56.2936	-84.4962	-75.2057	-74.962	-69.4905	-68.2491	-96.4461	-66.9738	-48.3283
Rubrobacter xylanophilus DSM 9941	49.0936	-25.2135	-5.09067	30.1075	-0.561206	-14.5318	-69.9456	-6.89998	-62.3812	5.58569	-44.2329	-58.0867	49.5649	-50.9028	54.4002	101.715	-14.4602	83.8208	54.5143	33.7516	32.7966	-76.384	57.5031	-31.1729	24.6463	75.5924	2.0017	-26.4076	68.4996	-30.6282	-2.65707	1.18639	-1.0931	26.6121	58.7723	9.93964	-47.6869	-51.1245	-49.3547	24.4777	15.0058	-55.8037	-25.7952	12.8329	4.95701	-15.218	-42.1406	48.376	1.24556
Ralstonia metallidurans CH34	-68.351	-77.243	-64.8308	-57.6447	-82.2638	-86.8976	-117.777	-60.5972	-94.0316	-72.452	-83.7534	-98.6738	-55.3154	-115.632	-52.4217	-69.3875	-63.4913	-59.1972	-64.7744	-50.7378	-47.4658	-94.7823	-58.8931	-69.7645	-46.6272	-73.7227	-81.5004	-84.4384	-53.5259	-103.655	-59.9461	-63.9026	-53.4724	-69.2294	-37.5992	-67.8833	-89.9323	-87.5954	-74.1986	-56.0373	-46.7874	-78.1192	-72.6674	-60.7514	-58.3466	-47.0899	-79.295	-67.2655	-63.9341
Burkholderia xenovorans LB400	-50.6099	-75.178	-60.1311	-49.8224	-69.7625	-46.2258	-61.4047	-43.4625	-61.7414	-59.3816	-46.1943	-59.9986	-32.2661	-49.5722	-53.8442	-59.2045	-55.3046	-26.0581	-34.4326	-34.6194	-34.6218	-60.4725	-30.3543	-37.1929	-49.3362	-68.5682	-57.385	-64.8622	-56.4322	-67.4946	-44.5459	-45.9892	-46.4311	-49.8475	-26.725	-47.2396	-57.9954	-48.6478	-51.1986	-53.2074	-39.7245	-54.1898	-55.0682	-57.3556	-55.2983	-45.0925	-28.031	-57.3464	-36.5181
Mesorhizobium sp. BNC1	-65.2436	-93.2345	-81.5936	-46.2835	-94.8976	-84.8483	-115.666	-69.7282	-117.015	-83.5868	-96.4998	-87.3824	-47.5431	-109.367	-48.0894	-55.6508	-97.3926	-56.637	-45.5448	-54.2844	-58.7847	-118.158	-47.3678	-73.8521	-52.5297	-69.5474	-82.4178	-87.1422	-34.4013	-101.126	-52.1958	-72.706	-56.7902	-48.049	-63.7905	-62.6622	-99.9194	-83.7199	-91.1605	-44.5459	-47.1399	-94.1196	-79.2217	-49.7555	-55.2946	-61.5016	-94.6787	-66.1077	-43.7728
Sinorhizobium meliloti 1021	-44.4319	-83.9506	-74.5187	-51.0647	-87.9494	-82.6423	-72.9634	-63.4472	-69.3398	-96.822	-76.629	-56.3956	-41.3992	-55.9303	-35.7245	-64.4379	-79.1494	-63.7348	-49.602	-47.7991	-50.6165	-96.4176	-59.6682	-69.579	-61.0148	-70.518	-84.2082	-75.7691	-42.3909	-89.2855	-45.4321	-57.5976	-60.037	-48.5139	-69.5552	-46.5634	-76.8047	-79.4704	-69.0009	-58.4015	-62.4181	-76.0104	-65.4717	-45.1418	-57.976	-69.9198	-83.8026	-44.2989	-34.6587
Mesorhizobium loti MAFF303099	-68.4658	-93.5584	-76.3198	-46.157	-97.7957	-79.9205	-87.0393	-56.8514	-84.3455	-95.3391	-79.8027	-57.7897	-51.5858	-65.0339	-39.9605	-81.8898	-77.2162	-63.0477	-49.2063	-50.3202	-51.2737	-94.568	-60.7331	-71.2917	-55.3998	-75.0914	-71.8039	-82.5943	-66.3885	-73.4953	-49.0597	-58.3135	-55.8652	-45.8786	-56.9039	-53.4309	-88.9088	-83.5596	-73.684	-54.0168	-50.6823	-90.0203	-78.2316	-53.4946	-58.2345	-65.4626	-84.0934	-67.7706	-48.1193
Kineococcus radiotolerans SRS30216	-83.9415	-135.196	-117.547	-110.03	-135.885	-122.703	-171.234	-96.1857	-162.246	-157.523	-117.895	-150.435	-75.9855	-159.631	-90.9514	-97.6831	-135.456	-92.1838	-102.492	-85.6176	-88.9677	-159.479	-109.45	-92.4416	-106.347	-119.995	-136.394	-115.28	-86.6014	-128.415	-77.5709	-107.667	-111.14	-74.0432	-114.546	-79.5832	-134.459	-129.237	-119.939	-99.3865	-84.2261	-127.498	-105.893	-88.5549	-98.4706	-81.0521	-130.292	-83.905	-76.5837
Ralstonia solanacearum GMI1000	-68.2606	-92.7015	-87.0764	-62.7257	-95.4728	-109.918	-146.076	-75.3745	-135.162	-114.705	-91.9052	-104.118	-66.7279	-142.624	-59.0861	-83.695	-85.2625	-62.1593	-49.7192	-55.1422	-53.0319	-111.882	-57.057	-88.9666	-65.2492	-73.3976	-93.933	-100.958	-72.3523	-106.758	-61.3507	-63.2039	-59.7386	-66.4906	-56.1677	-71.0685	-102.793	-101.519	-82.9104	-65.377	-48.1576	-92.4519	-98.6148	-62.419	-67.5858	-54.4826	-92.5454	-69.5151	-62.7614
Leptospira interrogans serovar Copenhageni str. Fiocruz L1-130	-123.144	-135	-119.826	-111.942	-141.49	-128.528	-168.631	-98.1649	-148.77	-143.4	-106.366	-127.818	-87.3589	-169.761	-93.6451	-180.011	-138.496	-137.483	-109.772	-84.4945	-88.9563	-135.225	-110.548	-93.9526	-120.693	-136.418	-119.001	-143.815	-145.489	-150.694	-118.651	-118.782	-114.649	-103.139	-118.116	-115.569	-107.04	-116.113	-126.258	-118.679	-103.653	-94.0312	-114.477	-62.161	-109.54	-82.1206	-113.792	-127.304	-96.5619
Propionibacterium acnes KPA171202	-26.0601	-85.5365	-85.0134	-56.0542	-85.3268	-99.7268	-125.794	-84.4764	-129.383	-114.475	-111.046	-108.538	-18.4821	-109.068	-56.5856	-43.1073	-90.734	-57.6166	-51.4589	-30.41	-29.7455	-119.943	-60.102	-91.3192	-55.2564	-69.3384	-82.8031	-99.6628	-48.491	-124.451	-56.99	-76.0638	-65.1328	-40.7615	-59.9381	-50.9651	-125.553	-107.451	-102.88	-52.4919	-45.4515	-114.757	-91.3342	-52.4214	-67.1124	-68.3463	-101.897	-25.1382	-44.1811
Mycoplasma mobile 163K	-80.0275	-93.9168	-82.713	-86.0584	-94.4064	-93.9937	-114.631	-84.1721	-108.16	-110.53	-88.8817	-99.1206	-73.7234	-110.402	-75.9935	-97.3248	-89.3728	-87.5858	-80.468	-72.209	-69.7371	-109.178	-77.8702	-75.5605	-81.9279	-96.0323	-100.684	-97.3636	-79.4515	-111.564	-66.5088	-77.4669	-80.2957	-82.3279	-79.7458	-60.463	-93.914	-90.804	-99.0809	-84.685	-62.648	-95.2551	-91.27	-73.5322	-78.7613	-70.1012	-100.813	-81.1635	-52.7824
Synechococcus elongatus PCC 6301	-43.7313	-95.5967	-87.7562	-43.8567	-89.6143	-49.1932	-87.3546	-43.4579	-78.3504	-92.4667	-58.0511	-64.6089	-38.7632	-77.7378	-63.0428	-54.4064	-96.2184	-63.5869	-47.8612	-43.9276	-48.2417	-75.5037	-47.8702	-50.3463	-54.0809	-41.1077	-39.9974	-61.4324	-21.6268	-78.7524	-71.564	-68.0068	-50.5618	-61.2405	-59.564	-66.2677	-69.4732	-71.8103	-78.6949	-55.8899	-46.4783	-56.1465	-64.2476	-25.7333	-50.9709	-49.2217	-49.0538	-43.9622	-62.0205
Burkholderia vietnamiensis G4	-62.4966	-96.2564	-84.0721	-72.4617	-88.5755	-79.5322	-106.83	-56.2585	-79.8619	-106.749	-81.1489	-87.3965	-57.7262	-87.583	-72.5954	-97.4525	-80.0409	-81.6229	-58.0286	-50.6014	-50.3038	-97.3682	-64.6707	-63.778	-69.7813	-88.7791	-89.4944	-92.0711	-82.9445	-87.3184	-64.2897	-69.0346	-69.8527	-70.5375	-55.3567	-74.1937	-82.1965	-73.8462	-71.1036	-61.4659	-61.5274	-82.3128	-79.712	-69.8619	-55.0779	-61.8878	-72.1878	-61.9203	-68.7713
Burkholderia sp. 383	-54.0429	-79.4491	-76.2795	-65.8149	-86.792	-87.7013	-97.3128	-62.3735	-91.2711	-88.1304	-81.2474	-68.5614	-37.3075	-90.0019	-64.04	-84.6904	-70.2683	-44.6007	-33.7988	-32.225	-40.8574	-100.586	-34.4716	-55.9147	-66.1552	-72.503	-74.6845	-78.4701	-74.6341	-75.5425	-60.626	-58.2327	-52.121	-55.9882	-41.0235	-62.4028	-83.2758	-79.9255	-62.2171	-56.8587	-49.7569	-78.3957	-66.8456	-58.2313	-47.3076	-58.0063	-66.4844	-55.4991	-59.95
Ehrlichia canis str. Jake	-36.1037	-71.6227	-64.4393	-61.4929	-68.1352	-51.8359	-86.3416	-43.341	-82.2644	-71.9806	-48.3509	-53.416	-42.883	-83.6398	-56.5844	-58.4974	-75.002	-65.8114	-52.6854	-49.7702	-43.2922	-79.4917	-53.0935	-46.1043	-66.1144	-34.425	-57.8188	-68.0741	-43.9079	-76.4273	-69.9118	-57.8898	-53.7972	-52.2466	-52.0634	-61.5355	-56.2415	-52.5859	-48.4341	-60.3812	-49.0362	-48.515	-45.8756	-20.5826	-53.2652	-38.6675	-68.211	-37.1105	-45.8331
Rhodospirillum rubrum ATCC 11170	-32.9155	-74.4887	-59.128	-45.843	-69.0173	-57.7891	-60.5609	-44.4312	-63.0189	-70.7986	-59.5468	-57.7286	-30.2978	-58.1168	-27.4347	-42.7951	-71.1143	-52.1984	-49.5024	-34.0212	-31.2896	-74.736	-47.5222	-59.5897	-30.6998	-45.6339	-65.5432	-73.8147	-38.1379	-91.0416	-46.51	-45.1365	-36.7843	-63.347	-37.6488	-45.6332	-73.738	-57.7295	-62.4486	-35.6669	-44.0591	-57.2153	-63.3467	-50.0921	-27.3463	-38.589	-64.6941	-32.229	-28.4144
Cytophaga hutchinsonii ATCC 33406	-104.215	-136.768	-116.458	-121.698	-135.286	-116.136	-142.825	-92.0678	-134.485	-161.51	-101.21	-119.89	-79.8361	-129.553	-100.314	-134.889	-125.353	-118.2	-99.8011	-76.6772	-72.0054	-134.721	-109.748	-83.1197	-110.523	-115.503	-95.8078	-136.353	-115.174	-132.072	-107.666	-101.452	-108.868	-103.106	-110.01	-105.028	-123.254	-114.269	-120.818	-117.494	-86.3527	-93.8789	-88.8093	-58.9362	-97.5277	-83.1655	-124.557	-110.482	-95.8723
Geobacter metallireducens GS-15	-49.7915	-33.0368	-41.0359	-20.969	-35.4971	3.26364	21.9167	5.85482	12.2725	-13.0349	4.60078	-2.49705	-25.6707	1.36974	-22.8103	-66.7738	-39.4521	-32.533	-35.5249	-18.1392	-14.7298	17.5493	-35.1252	3.36414	-32.6468	-54.0005	17.0052	11.0304	-73.5025	14.9403	-28.5	-10.9481	-28.2374	-45.9676	-22.9905	-35.9911	3.35261	4.21115	-6.50544	-13.6572	-32.8207	12.9454	0.0234868	-15.179	-24.3684	-14.9527	9.23235	-51.8443	-27.1397
Thermobifida fusca YX	-30.5245	-85.4822	-87.4546	-47.912	-89.8194	-89.8538	-108.415	-70.4887	-118.003	-95.2911	-97.8186	-90.1966	-26.2978	-120.487	-38.7196	-29.1306	-100.724	-27.7156	-18.2069	-32.2362	-44.216	-109.351	-31.1707	-76.6454	-46.3579	-17.7157	-93.2512	-86.1024	-13.9475	-108.659	-41.9737	-69.1594	-57.2718	-30.3788	-36.9622	-51.5309	-118.099	-112.566	-100.675	-44.5449	-44.3894	-92.3781	-85.2021	-32.1991	-57.2887	-42.7692	-108.086	-28.2167	-38.2708
Burkholderia thailandensis E264	-57.2806	-96.9923	-82.4479	-59.1818	-90.8677	-92.9302	-111.473	-64.4735	-121.654	-95.5909	-83.8224	-86.4746	-42.3827	-123.184	-59.1485	-79.682	-74.8771	-44.2949	-47.9865	-44.7179	-36.0811	-98.9143	-60.7062	-67.3617	-54.9239	-75.4895	-87.2436	-87.2449	-86.8502	-88.7697	-47.0677	-59.5609	-55.1158	-49.787	-48.7126	-61.451	-86.9159	-81.6042	-80.6233	-53.1724	-48.958	-73.2931	-81.161	-60.0684	-62.4844	-54.7909	-79.4677	-59.8462	-52.8337
Bacillus halodurans C-125	23.7779	-41.0653	-28.5552	-42.0532	-42.6386	-64.1161	-65.9083	-40.7122	-81.6102	-56.5253	-65.7157	-63.6987	-20.7674	-70.8117	-17.6231	-5.75262	-29.8602	-6.75991	-19.9104	-17.084	-20.1083	-83.3564	-15.21	-37.2468	-36.0392	-1.56547	-81.1726	-61.1487	-14.4584	-66.5127	-37.6488	-40.6114	-41.1317	-23.9544	-28.7876	-29.8541	-49.4119	-53.3246	-29.6746	-37.005	-25.6595	-54.377	-45.243	-22.3603	-55.3208	-28.0948	-73.8183	26.2804	-19.3979
Bacteroides fragilis NCTC 9343	-136.364	-130.68	-122.102	-130.789	-115.285	-101.566	-124.001	-97.5003	-126.199	-163.584	-92.4215	-104.533	-110.406	-117.461	-119.405	-211.112	-124.601	-155.868	-139.212	-100.484	-92.327	-125.613	-142.703	-50.2662	-138.867	-192.801	-107.818	-133.577	-172.299	-105.688	-108.722	-109.183	-125.286	-105.988	-147.878	-88.295	-95.4138	-96.2806	-80.0435	-141.844	-107.352	-103.072	-65.4098	-105.148	-118.223	-91.0309	-116.448	-137.992	-79.6788
Clostridium acetobutylicum ATCC 824	-97.1242	-43.5763	-56.2098	-72.9832	-74.1064	-23.8684	-39.7732	-26.4753	-37.2064	-79.9564	-36.5875	-46.8304	-83.4776	-13.3079	-89.5724	-141.153	-64.2071	-107.445	-84.7119	-59.1867	-64.4476	-30.8594	-86.7408	3.35331	-87.8441	-130.896	-52.6327	-34.9934	-114.379	-29.1596	-58.6136	-62.2201	-66.8964	-57.4993	-83.8504	-48.7072	-26.7963	-26.7851	-5.52508	-75.8108	-58.1456	-30.2559	7.58817	-60.2339	-54.4463	-46.6404	-9.83293	-98.4436	-45.4807
Clostridium difficile 630	-91.2175	-42.3411	-49.0617	-77.0251	-56.8514	-55.7481	-69.8033	-43.851	-75.5807	-83.751	-45.0089	-66.3911	-71.9816	-67.6301	-73.6584	-154.194	-64.9032	-92.0363	-68.8086	-69.8933	-68.2554	-88.1186	-76.7132	-41.8394	-81.8309	-136.256	-76.3713	-82.4914	-131.024	-64.4973	-52.1722	-59.0468	-73.3272	-60.3792	-73.0529	-41.6722	-39.9645	-37.9931	-17.443	-83.8048	-58.9376	-47.6769	-19.489	-89.2575	-83.0444	-65.9136	-70.8852	-91.4577	-17.553
Gluconacetobacter diazotrophicus PAl 5	-92.2431	-116.626	-112.256	-96.063	-124.157	-135.914	-167.894	-97.5003	-148.313	-162.046	-118.611	-114.888	-67.58	-147.417	-79.651	-141.357	-117.26	-77.5852	-75.8313	-67.281	-65.5376	-132.93	-63.8654	-113.679	-95.9262	-126.045	-110.684	-138.095	-117.517	-144.227	-93.6726	-101.268	-96.9603	-64.5861	-82.9652	-79.7494	-118.83	-122.817	-111.569	-89.8928	-77.1949	-121.279	-106.449	-83.3146	-81.5032	-91.6697	-113.912	-96.5658	-72.5184
Klebsiella pneumoniae subsp. pneumoniae MGH 78578	-48.336	-44.0586	-55.4423	-44.411	-39.8439	-60.2327	-82.0656	-45.5444	-69.0141	-101.459	-50.0479	-70.4922	-38.7345	-75.4871	-55.8521	-53.8011	-54.6669	-53.6731	-49.9599	-35.1276	-40.9425	-76.3605	-57.3551	-47.1833	-47.9666	-75.7856	-60.2939	-74.7776	-40.6471	-74.2307	-40.9135	-51.5691	-46.2602	-41.2967	-55.3074	-36.433	-46.974	-36.6932	-43.1836	-51.1105	-40.5869	-46.5844	-50.8573	-38.132	-42.035	-37.6862	-65.1557	-48.636	-41.0794
Lactobacillus acidophilus NCFM	-114.321	-137.261	-117.827	-121.856	-135.324	-139.813	-171.242	-103.545	-175.205	-171.519	-144.404	-164.243	-98.7035	-172.944	-97.0462	-152.752	-121.772	-113.728	-108.565	-92.8294	-103.944	-162.832	-103.659	-116.695	-117.176	-138.232	-146.633	-149.806	-114.985	-160.715	-77.0906	-108.777	-120.255	-101.963	-115.257	-87.3407	-152.692	-151.079	-125.825	-120.584	-92.4848	-139.968	-116.588	-117.748	-122.27	-104.914	-134.352	-114.171	-78.5045
Legionella pneumophila subsp. pneumophila str. Philadelphia 1	-81.2848	-122.948	-112.552	-89.0099	-130.218	-126.634	-141.165	-93.8859	-151.643	-138.511	-122.158	-123.647	-61.5554	-146.889	-59.4915	-121.469	-128.195	-106.119	-79.6646	-60.2616	-58.3689	-131.954	-80.3582	-109.314	-80.375	-99.6677	-121.621	-137.196	-95.7294	-134.677	-75.8899	-92.1454	-88.2889	-67.3519	-83.4692	-83.327	-139.347	-133.002	-126.425	-77.6864	-77.7456	-120.637	-116.471	-70.3935	-80.6909	-77.9646	-120.652	-79.8367	-68.3344
Listeria innocua Clip11262	-35.3426	-87.7668	-74.9702	-83.6442	-81.0788	-90.2605	-107.869	-58.5146	-109.803	-108.69	-75.8303	-83.103	-42.6866	-96.1979	-62.6968	-88.2039	-84.0036	-65.37	-67.2781	-35.9172	-45.9502	-92.9285	-70.135	-68.3972	-81.0567	-78.8275	-101.499	-76.0743	-50.3798	-87.391	-60.3987	-70.6325	-87.3651	-62.0536	-77.0583	-71.3034	-79.7007	-68.2376	-61.0739	-85.2889	-60.9901	-83.3616	-67.8013	-69.9642	-85.5335	-67.7126	-68.6301	-36.9784	-57.1477
Mycobacterium leprae TN	-30.6072	-96.1501	-89.8928	-66.3449	-93.5448	-75.7989	-111.066	-54.0239	-114.219	-92.358	-76.4118	-73.3483	-32.4316	-103.371	-54.0018	-51.7616	-89.975	-51.4387	-45.0082	-38.4969	-48.2869	-98.4911	-47.9753	-47.4744	-61.8337	-42.594	-70.2449	-84.6788	-35.6881	-89.8329	-77.9837	-69.3924	-51.6733	-33.7577	-44.0619	-77.4286	-92.9133	-87.3206	-79.9414	-62.1454	-60.9388	-74.2632	-68.7072	-13.5554	-59.277	-51.4819	-76.3649	-34.3432	-63.1679
Mycoplasma mycoides subsp. mycoides SC str. PG1	-101.097	-119.557	-116.27	-109.826	-125.217	-131.424	-166.699	-93.4394	-152.59	-148.704	-111.859	-126.863	-97.9758	-166.514	-90.0889	-139.088	-112.794	-118.375	-105.68	-96.3337	-97.9963	-137.702	-105.669	-99.9964	-109.537	-126.578	-124.074	-138.647	-110.538	-141.733	-80.7833	-96.5929	-106.27	-98.7053	-113.877	-78.4705	-117.762	-116.203	-106.489	-107.715	-86.7996	-111.28	-109.349	-105.525	-102.084	-91.8608	-129.817	-102.285	-70.5294
Mycoplasma penetrans HF-2	-103.88	-115.841	-112.215	-107.442	-117.544	-119.419	-148.742	-89.663	-145.402	-147.873	-100.482	-124.113	-88.5012	-147.461	-93.2413	-129.459	-110.998	-118.221	-110.395	-85.7066	-87.4065	-136.112	-107.3	-83.6553	-109.165	-122.636	-123.99	-125.057	-106.462	-134.134	-81.9891	-86.0907	-103.918	-95.3162	-105.571	-75.4922	-110.625	-110.081	-114.384	-113.309	-74.7883	-109.741	-100.357	-99.038	-95.5986	-82.0546	-123.006	-105.104	-67.4992
Mycoplasma pneumoniae M129	-77.482	-94.9948	-92.513	-90.2278	-103.439	-100.136	-127.442	-83.1703	-127.255	-120.912	-97.8301	-103.141	-77.5948	-118.63	-80.0734	-109.635	-92.0794	-95.8244	-87.2855	-78.4727	-76.9194	-114.812	-88.2246	-80.21	-93.3019	-103.072	-102.754	-106.496	-93.408	-114.6	-74.3245	-82.5904	-86.3982	-83.2555	-84.0061	-62.9038	-109.342	-105.317	-102.703	-94.2628	-68.9652	-102.852	-86.8098	-80.7515	-83.1894	-74.7281	-104.283	-79.8209	-58.9878
Mycoplasma pulmonis UAB CTIP	-87.7748	-107.43	-99.6241	-92.0292	-112.848	-105.988	-139.185	-88.2838	-128.827	-131.893	-97.1238	-115.974	-92.1413	-131.513	-86.2063	-112.886	-102.309	-109.406	-100.214	-87.3086	-88.7176	-125.648	-97.4689	-89.6094	-93.3788	-104.392	-112.413	-113.372	-97.4854	-120.017	-77.4757	-87.9543	-92.1872	-93.0089	-98.2277	-65.1758	-106.519	-104.644	-100.709	-92.5632	-70.0116	-107.467	-98.8094	-100.499	-82.9552	-83.756	-116.086	-90.4131	-63.9139
Pasteurella multocida subsp. multocida str. Pm70	-49.0945	-71.8126	-89.4165	-59.9885	-83.1859	-79.8393	-103.946	-71.568	-99.6718	-98.954	-81.6404	-80.9562	-46.4586	-91.1992	-61.4706	-60.9423	-89.2905	-81.2785	-74.065	-64.9813	-65.2182	-98.5046	-65.3184	-61.0325	-65.2412	-66.3048	-90.0504	-90.9152	-53.7233	-98.0537	-53.2502	-80.3183	-58.6464	-64.4776	-71.0862	-64.7317	-73.6854	-68.4901	-61.3231	-61.1803	-58.3282	-76.6619	-65.7472	-42.2448	-63.307	-57.1504	-78.5646	-49.0166	-55.5547
Rickettsia conorii str. Malish 7	-121.791	-152.98	-139.17	-128.817	-169.649	-134.051	-197.496	-109.866	-183.75	-168.78	-138.689	-156.392	-108.549	-192.247	-102.19	-162.586	-150.298	-138.786	-122.858	-104.356	-102.735	-177.385	-127.945	-126.358	-131.475	-141.292	-143.626	-164.485	-142.481	-158.813	-112.483	-118.106	-129.522	-123.518	-127.351	-113.957	-143.277	-143.43	-132.603	-123.648	-97.1338	-135.393	-131.577	-109.421	-125.733	-106.78	-150.835	-122.396	-105.205
Rickettsia prowazekii str. Madrid E	-55.461	-79.5986	-71.8554	-69.4147	-86.031	-66.2641	-100.657	-57.3941	-87.6485	-88.5922	-76.5268	-80.3709	-44.74	-96.5625	-53.9522	-81.1932	-79.769	-71.0506	-58.5041	-53.8949	-53.326	-100.59	-63.4173	-58.562	-67.8856	-67.6922	-71.5422	-91.1908	-73.5919	-86.2227	-64.6849	-66.6838	-66.6092	-59.7729	-60.2249	-70.5134	-75.4604	-71.6722	-70.5359	-62.1355	-52.2194	-73.4437	-57.7127	-49.7818	-66.8557	-57.2747	-78.3097	-56.2486	-60.0768
Staphylococcus aureus RF122	-28.5123	-85.7605	-81.0735	-57.9336	-74.7631	-94.401	-118.878	-62.9196	-107.993	-111.39	-71.4552	-89.5654	-27.789	-109.332	-36.2783	-52.6733	-80.4154	-51.4034	-41.7992	-24.0804	-30.399	-109.346	-46.7788	-65.6671	-56.1543	-35.6543	-97.1494	-78.1582	-52.294	-89.6816	-55.9436	-63.308	-61.7467	-41.3337	-39.4893	-55.7472	-85.6725	-72.0481	-63.8812	-63.9923	-47.902	-86.5258	-61.5043	-37.842	-67.2005	-57.6814	-81.9769	-31.7304	-41.535
Thermoanaerobacter tengcongensis MB4	-42.76	42.6904	36.0201	-17.893	35.6251	-21.7599	-33.2052	-6.18799	-29.8021	-13.0049	-20.9535	-27.9916	0.0127762	-23.345	-14.5701	-62.17	33.1684	-15.5187	-27.3825	1.26541	-5.03042	-28.2667	-32.4918	-15.5317	-18.1309	-76.9205	-19.7511	-20.6144	-66.0395	-29.2366	23.3924	4.71499	-21.2327	1.76838	-11.1232	15.0267	-35.0418	-28.2545	-24.3283	-5.84656	-6.37094	-37.127	-7.64404	-49.6689	-25.4906	-24.9685	-16.577	-45.0349	20.3909
Ureaplasma parvum serovar 3 str. ATCC 700970	-76.9076	-96.0044	-87.509	-88.0351	-99.5135	-96.3912	-121.773	-79.2691	-114.545	-111.115	-93.0155	-100.574	-78.4158	-118.752	-71.943	-101.562	-89.2263	-97.7876	-89.8184	-76.7273	-80.2949	-105.424	-91.3864	-73.4578	-81.8287	-90.7195	-95.099	-99.0634	-84.1563	-101.669	-66.1889	-81.8282	-77.3066	-78.0154	-85.3097	-56.6544	-97.8954	-94.7586	-85.6535	-87.5048	-57.8776	-96.4973	-81.8818	-78.4773	-73.0091	-69.9784	-92.7397	-78.9712	-54.0586
Wolinella succinogenes DSM 1740	-75.5691	-82.9797	-79.1166	-55.9927	-84.401	-49.9198	-79.1971	-39.1397	-73.7103	-73.3313	-40.5315	-55.6453	-70.4236	-80.3646	-57.0396	-76.2005	-66.3017	-79.5607	-81.1611	-61.6771	-50.9303	-60.3684	-74.4473	-34.9755	-53.2364	-65.1796	-55.208	-55.7374	-63.3696	-58.6976	-67.5922	-69.0226	-47.5091	-58.387	-69.2348	-66.9339	-30.0426	-28.7503	-51.4796	-55.0991	-47.6136	-28.6292	-41.826	-32.1485	-40.1061	-25.6161	-51.0534	-79.5047	-64.6974
Yersinia pseudotuberculosis IP 32953	-72.4806	-83.7699	-93.2744	-74.561	-103.338	-108.85	-126.169	-81.5668	-126.961	-125.974	-93.5844	-106.361	-64.12	-134.151	-79.1278	-92.449	-88.5434	-84.8578	-84.1484	-57.4818	-65.5368	-120.942	-87.4143	-78.0587	-76.5311	-96.6303	-96.8713	-115.529	-80.5946	-114.115	-58.2787	-87.3256	-70.7424	-67.412	-90.0604	-52.5948	-95.2246	-85.1459	-81.4218	-77.4959	-61.3552	-81.2472	-90.0277	-58.8599	-67.9761	-55.9228	-109.341	-71.9555	-60.1667
Pediococcus pentosaceus ATCC 25745	-99.2215	-125.406	-109.368	-106.555	-128.213	-119.374	-155.129	-96.3213	-143.987	-149.406	-122.18	-135.015	-75.8282	-144.104	-91.8857	-130.597	-120.796	-97.5979	-95.1627	-81.1467	-81.1447	-123.974	-87.1781	-92.6372	-107.939	-119.503	-118.984	-111.683	-104.22	-118.862	-83.7763	-93.4548	-104.398	-91.1711	-96.5979	-70.538	-123.468	-116.283	-103.024	-102.708	-79.3935	-128.419	-91.8899	-89.9598	-108.656	-94.444	-97.5515	-98.0249	-63.9418
Bacillus licheniformis ATCC 14580	-11.0745	-31.1837	-29.6241	-34.9397	-27.7784	-73.1214	-74.7334	-34.2592	-90.0889	-73.6357	-55.2067	-60.9715	-13.269	-83.333	-30.5359	-30.8066	-31.0645	-27.2649	-33.8645	-17.4187	-24.3202	-87.921	-35.2952	-47.9544	-30.9887	-33.169	-75.3127	-57.5163	-40.7891	-61.0197	-40.0754	-50.6984	-40.6191	-17.043	-28.5993	-18.8479	-47.1099	-52.9905	-50.6252	-39.9609	-27.8264	-65.8609	-38.053	-36.2816	-56.635	-32.7438	-67.6358	-14.6611	-21.2818
Novosphingobium aromaticivorans DSM 12444	-93.7058	-117.647	-111.213	-105.713	-117.195	-109.837	-150.386	-77.0106	-151.512	-133.9	-103.079	-128.07	-59.7079	-154.657	-91.2812	-112.608	-124.344	-72.5135	-69.3176	-66.2452	-74.4101	-153.365	-69.4595	-91.3392	-109.625	-79.1372	-108.725	-141.192	-103.37	-127.601	-104.896	-115.244	-114.275	-80.3841	-73.3523	-97.6201	-127.501	-113.457	-108.455	-103.589	-90.2132	-92.7456	-108.204	-68.9841	-104.674	-78.2675	-101.537	-92.0986	-81.297
Staphylococcus haemolyticus JCSC1435	-42.3028	-110.916	-92.9583	-79.0334	-98.0425	-108.163	-143.801	-76.4471	-130.84	-121.818	-93.4075	-112.479	-45.4356	-127.588	-58.0501	-68.1927	-82.3256	-67.9825	-64.2593	-38.6169	-47.8782	-122.289	-61.5142	-86.3924	-85.2959	-59.5654	-113.417	-110.293	-55.1315	-103.893	-74.4041	-83.3404	-81.8493	-58.3331	-65.0398	-58.2838	-110.384	-96.4329	-89.8111	-90.8903	-60.9461	-104.679	-87.7925	-45.6831	-85.8903	-67.2749	-106.333	-42.6433	-59.7551
Leifsonia xyli subsp. xyli str. CTCB07	-64.4741	-126.024	-111.367	-91.1069	-124.425	-118.003	-156.76	-86.4481	-147.368	-136.281	-113.7	-123.459	-59.5542	-145.966	-72.3456	-82.7572	-122.415	-71.5503	-71.2334	-68.9268	-78.1729	-144.105	-67.505	-91.1202	-80.3544	-78.907	-122.257	-108.49	-71.1983	-127.531	-74.9992	-93.2707	-86.6865	-64.5428	-81.284	-85.4032	-131.005	-125.756	-114.529	-77.2509	-77.0459	-111.764	-102.911	-62.3069	-89.3118	-73.9704	-112.954	-68.4037	-81.1931
Bartonella quintana str. Toulouse	-28.7881	-72.4119	-70.695	-45.4227	-69.3698	-64.6698	-67.985	-55.2788	-60.5264	-80.6075	-60.4673	-44.9493	-34.8888	-62.3084	-42.7401	-52.27	-69.9508	-64.1231	-48.6477	-37.1962	-39.0992	-67.6733	-55.1963	-43.5367	-52.172	-33.9607	-53.8593	-66.2193	-36.0532	-60.4739	-61.5932	-56.5889	-52.0444	-45.1198	-56.8071	-54.3129	-71.8588	-63.3349	-49.2771	-50.0885	-46.4876	-61.008	-53.8764	-25.4506	-51.1459	-42.2516	-60.0669	-29.1678	-48.0729
Bartonella henselae str. Houston-1	-66.8326	-117.026	-108.983	-80.3098	-113.061	-102.323	-118.599	-86.2757	-109.799	-117.866	-104.472	-90.6612	-60.1852	-116.132	-66.7919	-93.7467	-112.094	-91.8034	-76.141	-59.6443	-61.2381	-119.214	-80.1346	-83.2811	-77.8872	-71.0405	-89.771	-104.83	-63.2072	-105.662	-88.5083	-87.0606	-78.8888	-77.3812	-85.8984	-81.4699	-109.909	-104.733	-86.117	-82.6374	-68.7759	-101.152	-95.5778	-55.2096	-79.781	-75.9513	-103.89	-65.5088	-76.4682
Idiomarina loihiensis L2TR	-52.3181	-107.992	-102.366	-92.8092	-122.086	-123.349	-156.26	-93.2478	-145.601	-132.234	-109.109	-106.087	-74.0382	-150.24	-71.1756	-78.8589	-109.459	-102.032	-87.6283	-72.5232	-80.8044	-146.607	-80.8037	-92.8727	-96.0576	-58.9838	-124.461	-134.246	-92.848	-137.405	-112.9	-106.706	-88.9101	-88.1264	-93.3892	-76.0448	-116.611	-107.748	-89.9557	-90.7162	-71.5635	-118.329	-106.118	-69.5251	-94.0692	-78.0468	-120.785	-50.6225	-69.6051
Bradyrhizobium sp. BTAi1	-67.5243	-83.2662	-69.0826	-48.4796	-84.5864	-65.5408	-80.8541	-51.2642	-78.8827	-66.7682	-75.1538	-81.4048	-41.7556	-81.6042	-35.618	-54.5153	-73.0523	-40.6724	-27.0676	-44.6329	-50.3319	-80.3792	-47.7113	-55.7849	-46.8003	-35.8159	-62.504	-72.0913	-52.9795	-73.3298	-57.3068	-52.0446	-46.8663	-58.5604	-42.3905	-58.2043	-75.2005	-78.8502	-67.1093	-46.4858	-46.539	-66.3169	-64.7187	-43.8806	-37.0896	-51.8938	-51.2028	-67.9496	-44.7804
Renibacterium salmoninarum ATCC 33209	-94.888	-146.62	-132.658	-113.349	-148.074	-140.355	-199.131	-110.926	-204.88	-173.331	-136.19	-164.002	-78.9089	-206.763	-92.2242	-124.286	-143.02	-102.517	-90.6509	-72.4487	-80.0643	-183.861	-90.2154	-121.353	-112.012	-130.879	-154.569	-148.164	-117.471	-176.501	-96.0538	-101.561	-110.732	-87.3095	-118.139	-96.6611	-154.346	-141.502	-137.131	-112.029	-93.4384	-139.842	-125.655	-82.5582	-107.912	-90.7036	-142.131	-96.9195	-87.8417
Thermodesulfovibrio yellowstonii DSM 11347	-25.7486	28.7355	25.4448	40.6709	30.33	50.7667	47.8793	34.3779	55.2954	99.4557	64.0905	41.2427	-1.77211	52.683	2.48036	-41.1187	28.3624	1.1965	16.5341	10.8851	27.6372	49.578	13.2589	25.6647	40.4243	-15.2259	62.5045	53.1969	-39.4918	40.1759	28.852	22.5405	53.1071	18.2455	8.47763	25.4636	32.734	33.9941	26.232	36.5364	26.8117	60.0179	17.8592	10.482	49.4888	41.8673	57.7699	-26.6797	14.6803
Chlorobium phaeobacteroides DSM 266	-62.6974	-62.8864	-67.1052	-61.8386	-66.9957	-34.1925	-8.89992	-31.807	-14.1016	-58.4308	-37.7158	-23.1992	-48.1456	-12.791	-51.0417	-96.8577	-71.3256	-71.3932	-60.8428	-50.4898	-50.7622	-17.8528	-66.0545	-39.581	-58.0933	-79.638	-36.3697	-40.6576	-73.3645	-36.5606	-58.5958	-44.4648	-51.8087	-42.1468	-49.6133	-58.6188	-56.4383	-45.534	-36.819	-57.7219	-44.2036	-40.9598	-41.8981	-29.5234	-49.9136	-42.6183	-38.9666	-64.0183	-59.1382
Chlorobium phaeovibrioides DSM 265	-5.00802	-36.1915	-45.2014	-36.375	-28.994	-6.16761	15.1643	-23.1576	-1.71047	-34.1898	-15.9748	19.2447	-13.657	-3.81542	-30.7472	-28.3272	-37.5994	-28.4033	-31.9816	-18.9983	-16.9938	-11.7027	-27.9958	-6.43753	-35.7596	-17.2588	-5.77513	-12.429	-19.9946	-15.61	-39.6532	-35.2914	-26.225	-15.0007	-23.4118	-44.4242	-15.2256	-22.049	-15.8109	-30.5359	-26.2746	-2.20871	-10.6776	7.21054	-18.4879	-8.29604	-0.321604	0.189448	-42.8326
Citrobacter koseri ATCC BAA-895	-58.6235	-60.1529	-65.517	-48.6803	-69.9039	-82.4345	-101.561	-58.114	-107.856	-109.555	-63.6857	-85.5392	-55.2038	-108.301	-67.926	-87.5128	-64.6433	-98.8797	-85.8469	-56.656	-49.6558	-92.1435	-75.098	-57.6335	-54.1557	-86.2877	-79.378	-102.703	-65.3856	-89.0291	-39.4981	-58.6447	-40.9413	-55.2665	-78.4429	-48.5136	-61.5101	-39.2463	-63.4866	-50.2606	-35.5035	-46.2469	-59.2408	-52.3329	-44.898	-50.1697	-91.6093	-57.81	-45.2766
Enterobacter sakazakii ATCC BAA-894	-73.6682	-82.2961	-73.6714	-80.608	-76.9362	-97.012	-121.19	-78.2796	-110.859	-128.725	-83.1088	-89.3438	-62.2311	-108.179	-70.3256	-94.909	-81.3618	-93.31	-71.7706	-66.089	-67.7243	-102.86	-82.4673	-81.2731	-71.7893	-92.266	-104.464	-100.078	-84.3587	-93.8642	-57.8904	-83.774	-65.4891	-67.1509	-79.1845	-57.7795	-85.3782	-71.202	-84.3905	-69.7873	-56.0995	-84.7417	-87.5611	-76.0341	-73.1572	-49.9628	-97.1146	-76.441	-51.9935
Arthrobacter aurescens TC1	-77.125	-121.551	-91.9064	-82.855	-110.222	-119.13	-151.508	-93.879	-162.747	-148.221	-118.63	-136.73	-74.3387	-147.11	-72.696	-78.2873	-99.7417	-61.7886	-65.5027	-60.0427	-61.495	-151.594	-62.3696	-104.047	-86.124	-96.6725	-129.739	-102.843	-79.4453	-137.55	-59.6441	-90.0216	-88.2327	-55.6998	-70.6878	-72.9635	-126.099	-123.892	-129.418	-80.1474	-64.4952	-107.245	-101.443	-76.3438	-94.6805	-74.683	-117.209	-79.0211	-62.0383
Anaeromyxobacter dehalogenans 2CP-C	-44.0352	-33.6901	-22.0802	-36.5413	-19.3165	-28.4708	-52.6086	-34.9885	-52.4789	-33.538	-35.8533	-56.6679	-20.7743	-52.778	-20.2136	-82.9325	-21.6996	-51.2284	-28.0301	-23.7123	-15.4289	-43.0197	-33.6479	-33.8971	-19.6827	-61.1898	-42.847	-18.7574	-63.4354	-37.0488	-40.0659	-20.1755	-20.6575	-30.9497	-33.5437	-21.2178	-48.0213	-44.8608	-58.8885	-23.6713	-13.4378	-44.4934	-44.1315	-18.9406	-28.4282	-10.614	-35.1107	-40.752	-15.4966
Chromohalobacter salexigens DSM 3043	-37.7731	-76.7251	-75.1744	-55.7243	-82.1233	-88.7774	-119.456	-78.841	-101.128	-86.9355	-83.164	-72.3385	-48.1174	-123.826	-49.9908	10.8644	-70.0196	-60.5552	-52.9059	-44.3271	-57.1434	-106.35	-59.1616	-81.6666	-53.27	-21.8439	-91.5873	-82.8029	-13.2467	-87.2961	-59.0486	-70.9839	-56.1126	-53.3969	-43.5578	-59.6583	-90.4395	-93.7397	-78.5939	-51.3576	-51.9728	-89.7812	-92.608	-59.9528	-63.7196	-68.3586	-100.28	-34.6255	-51.121
Arthrobacter sp. FB24	-71.4865	-120.961	-96.3237	-79.7918	-100.617	-109.605	-141.94	-93.5976	-148.384	-137.041	-116.386	-125.08	-66.8615	-151.727	-68.5695	-65.2506	-101.091	-65.6531	-58.7254	-46.6358	-60.1767	-138.78	-55.511	-96.6836	-80.0186	-98.5818	-125.14	-113.538	-62.5056	-125.758	-60.8113	-90.4335	-88.409	-56.4905	-75.022	-71.4031	-129.763	-120.57	-124.937	-76.0291	-66.8344	-114.01	-103.03	-74.2498	-88.9617	-73.3446	-118.221	-76.3234	-61.5442
Jannaschia sp. CCS1	-70.5924	-109.147	-97.5535	-77.596	-109.762	-98.9854	-138.203	-81.7267	-130.251	-118.485	-101.622	-101.059	-57.493	-134.531	-54.2352	-74.3218	-110.109	-67.4068	-68.5037	-73.5052	-77.2912	-150.265	-67.0528	-95.5589	-81.7031	-66.3585	-105.295	-129.583	-41.7399	-138.318	-74.3394	-77.6417	-85.9185	-86.8899	-75.1012	-71.72	-106.697	-99.5509	-95.4358	-77.6847	-67.852	-100.268	-106.745	-74.9732	-80.7792	-77.3011	-122.216	-72.2609	-63.0558
Clostridium beijerinckii NCIMB 8052	-72.8149	-42.2174	-55.5825	-49.8026	-46.9707	-19.4914	3.2615	-22.1446	-18.0088	-47.6893	-21.7115	-17.6075	-78.3815	7.54352	-65.0613	-110.883	-51.7159	-84.1447	-77.0647	-70.8289	-69.8161	1.76953	-82.326	21.3273	-53.2836	-128.534	-44.4433	-13.8504	-87.6153	3.88521	-33.5975	-34.7103	-49.0347	-48.4094	-81.6439	-30.5785	-3.5436	-13.2785	6.46337	-52.3911	-43.58	-29.2711	20.7151	-59.4599	-40.9787	-33.2065	13.2808	-74.0093	-41.3333
Borrelia garinii PBi	-78.0205	-92.6722	-80.4264	-90.3623	-100.194	-93.7769	-125.663	-75.006	-112.505	-104.033	-89.1055	-97.4092	-95.7437	-117.92	-67.3249	-107.617	-90.0527	-112.791	-100.62	-93.5986	-93.13	-115.547	-102.993	-75.9013	-90.9928	-103.429	-87.735	-105.18	-92.8751	-106.498	-73.6887	-78.7027	-83.6768	-91.1348	-100.979	-64.2313	-81.0724	-79.4259	-88.3284	-90.2563	-64.7173	-89.211	-81.7972	-81.4256	-81.0898	-68.3528	-104.241	-79.0426	-57.5096
Gluconobacter oxydans 621H	-104.565	-141.444	-118.567	-112.485	-138.563	-140.719	-159.928	-102.154	-172.042	-163.181	-126.092	-140.893	-60.8427	-157.763	-98.5867	-131.119	-123.867	-107.252	-73.608	-72.0988	-67.3653	-165.631	-82.843	-121.021	-95.7437	-118.679	-135.937	-139.543	-103.319	-159.282	-102.033	-111.939	-106.372	-80.7882	-100.384	-93.9787	-135.952	-136.022	-126.357	-105.354	-87.6053	-122.35	-120.383	-72.1506	-94.4423	-88.9744	-123.706	-106.897	-80.4721
Candidatus Blochmannia pennsylvanicus str. BPEN	-17.4662	-35.6117	-45.0523	-21.6141	-35.1251	-33.0631	-44.18	-12.0862	-48.0039	-42.6132	-35.8414	-32.258	-4.9319	-43.2038	-26.5124	-22.9848	-41.7832	-17.1986	-13.261	-20.204	-13.7807	-35.0653	-12.8646	-20.2342	-22.3913	-18.2378	-36.7741	-36.5872	-12.6777	-38.28	-35.7004	-19.4899	-16.8935	-4.53139	-14.7989	-29.2765	-40.69	-34.5476	-19.3622	-22.0495	-19.5074	-30.3453	-30.5993	7.9514	-14.6463	-8.74907	-22.3114	-17.5142	-32.6989
Xanthomonas oryzae pv. oryzae KACC10331	-113.117	-129.024	-123.515	-117.983	-140.596	-139.078	-193.804	-105.692	-183.518	-191.447	-117.697	-120.651	-88.6755	-184.718	-102.553	-178.567	-139.815	-117.632	-111.802	-96.9984	-88.0272	-159.298	-109.097	-116.22	-118.967	-151.433	-138.13	-155.061	-135.336	-161.456	-111.596	-107.571	-115.077	-95.8775	-114.684	-100.817	-142.385	-137.299	-127.639	-121.933	-87.6163	-132.359	-131.213	-93.2893	-108.272	-88.0704	-149.751	-118.611	-102.365
Silicibacter sp. TM1040	-37.5981	-101.775	-85.3951	-74.3014	-105.308	-101.048	-139.255	-71.5749	-126.631	-103.314	-101.679	-85.0606	-57.886	-142.741	-42.8855	-46.9674	-97.4172	-64.0052	-44.1883	-64.563	-67.8068	-136.139	-52.2378	-83.7755	-74.1715	-44.4901	-100.835	-114.399	-23.9275	-140.427	-63.8489	-82.4093	-83.1506	-74.8452	-63.3084	-57.8752	-91.9281	-96.9106	-102.698	-77.1375	-61.342	-96.3475	-93.5592	-48.5555	-76.6729	-68.7568	-119.148	-32.9308	-61.6311
Thiobacillus denitrificans ATCC 25259	-69.1176	-95.3549	-81.5057	-63.5298	-98.5695	-77.2741	-88.1006	-56.7614	-79.2309	-83.3426	-79.9401	-65.2195	-71.5472	-91.2812	-74.597	-77.1891	-94.6441	-78.8173	-67.1029	-76.8496	-69.0317	-101.902	-67.6078	-73.6044	-66.846	-58.1905	-53.9559	-57.1425	-71.8728	-62.9679	-68.8197	-72.0123	-65.4626	-73.8269	-71.9137	-79.8742	-83.2531	-80.0618	-75.0192	-55.2654	-48.9745	-81.3434	-84.4541	-52.0092	-63.137	-60.7168	-65.6771	-71.5761	-71.0761
Symbiobacterium thermophilum IAM 14863	-3.40751	-30.5315	-33.8899	-19.8646	-48.9412	-65.5201	-71.2214	-55.2786	-81.709	-52.2349	-52.5935	-49.309	-6.47826	-83.4461	9.95932	-31.7546	-22.8431	-40.3378	-44.4513	-6.54891	-13.3281	-83.4913	-41.7675	-65.2298	-12.4323	-18.8593	-72.4116	-64.3027	-27.0982	-76.3714	2.14469	-31.719	-15.0543	-27.5881	-42.0755	-24.2689	-67.0544	-51.324	-72.3314	-14.5034	-17.6755	-63.2195	-48.2454	-35.0861	-18.5773	-26.8467	-86.4779	-1.29417	-17.6755
Rickettsia canadensis str. McKiel	-92.3047	-119.664	-107.999	-100.391	-125.496	-103.511	-145.544	-82.7703	-133.6	-131.296	-98.7802	-112.987	-80.1605	-141.037	-79.8973	-125.439	-116.535	-98.7045	-95.532	-85.9125	-81.718	-134.389	-97.2341	-88.9546	-103.136	-104.808	-108.875	-131.199	-105.255	-123.328	-90.7335	-92.7647	-100.95	-96.2008	-96.6817	-94.7933	-109.578	-105.057	-105.257	-97.1701	-75.0154	-101.635	-89.5545	-84.6945	-100.305	-78.9919	-119.561	-93.617	-90.6663
Rickettsia akari str. Hartford	-108.109	-147.708	-130.081	-118.523	-154.01	-121.747	-181.267	-106.736	-164.627	-152.694	-128.129	-141.351	-97.1482	-174.266	-94.8726	-146.778	-141.225	-126.94	-112.738	-93.2565	-95.4011	-162.755	-117.003	-112.625	-121.246	-126.93	-130.573	-157.248	-127.102	-149.994	-105.562	-115.255	-116.239	-111.792	-118.018	-106.599	-131.042	-127.419	-130.214	-113.816	-92.7287	-122.107	-121.544	-97.8476	-117.838	-94.8079	-141.854	-109.619	-99.0983
Alkaliphilus metalliredigens QYMF	-55.87	-20.8166	-18.1698	-55.3373	-23.495	-14.3659	-20.2172	-23.0055	-11.3635	-47.7556	-35.7396	-25.0213	-64.0129	-22.7353	-61.2101	-92.6763	-21.0354	-103.767	-89.316	-66.6867	-70.0976	-43.959	-104.22	-34.2095	-71.6258	-87.6244	-54.0091	-22.4341	-67.3289	-38.9068	-61.0238	-23.2872	-64.6056	-88.2505	-90.4485	-30.2178	0.751959	3.96536	-23.6331	-67.6557	-43.7952	-26.35	-16.6286	-64.8407	-62.0054	-55.8351	-42.6545	-56.7936	-23.2623
Mycoplasma hyopneumoniae 232	-88.7178	-109.224	-95.7636	-89.4533	-102.667	-105.331	-134.767	-81.2868	-125.555	-126.183	-99.9468	-119.333	-87.8418	-131.935	-79.2912	-116.936	-100.329	-98.1181	-94.5646	-89.7304	-94.1752	-127.026	-87.4879	-93.3515	-89.5342	-108.329	-114.946	-109.76	-95.6613	-125.828	-68.5669	-87.7811	-88.6223	-82.5055	-92.2672	-64.1007	-109.477	-107.455	-105.879	-90.5014	-69.1574	-105.955	-98.9843	-90.9777	-86.3901	-80.8663	-110.523	-90.0636	-59.1767
Polaromonas sp. JS666	-63.0314	-110.268	-89.6916	-68.7582	-105.106	-98.295	-128.439	-73.1229	-118.913	-93.0335	-86.5311	-98.7407	-52.2281	-135.421	-58.5098	-61.1378	-91.0449	-61.9798	-67.2927	-45.5727	-44.1148	-100.965	-56.8883	-72.9187	-60.428	-43.5684	-88.514	-119.567	-65.1156	-101.823	-52.8648	-67.8118	-63.0404	-73.0805	-47.2672	-66.6861	-97.5707	-105.27	-78.0921	-62.6337	-54.061	-79.0288	-82.6742	-52.5797	-52.5638	-69.3763	-83.2263	-61.4937	-55.1701
Legionella pneumophila str. Paris	-91.0833	-124.83	-115.628	-95.7253	-133.186	-132.103	-143.244	-96.2447	-149.55	-144.368	-122.579	-133.836	-68.4052	-151.103	-65.3502	-134.128	-131.082	-110.431	-79.5781	-64.1129	-53.046	-139.255	-81.6302	-108.615	-90.2001	-114.85	-121.628	-142.514	-110.824	-137.446	-78.2388	-90.3664	-91.7892	-76.247	-92.3076	-84.5095	-140.178	-126.591	-122.926	-84.3535	-75.5078	-119.159	-115.293	-82.9901	-83.6816	-79.5954	-118.034	-91.8229	-68.1644
Photobacterium profundum SS9	-73.4936	-84.4172	-86.8472	-102.051	-98.263	-93.4262	-151.859	-79.1949	-138.272	-131.354	-76.591	-92.8931	-97.669	-147.785	-87.8452	-127.067	-97.2162	-121.656	-132.843	-108.01	-104.517	-125.162	-116.464	-87.0099	-94.7355	-106.168	-119.665	-112.913	-113.677	-133.019	-79.111	-94.9661	-95.2618	-88.4304	-123.767	-65.8431	-86.6427	-80.3393	-82.2026	-109.95	-70.2453	-91.0834	-89.7748	-84.8856	-105.754	-74.4618	-128.482	-76.9769	-51.3065
Frankia sp. EAN1pec	-118.953	-124.386	-110.134	-83.8294	-100.604	-98.7695	-125.588	-67.7532	-137.963	-128.985	-94.7196	-111.638	-86.0504	-121.644	-72.552	-148.748	-115.013	-90.1598	-82.5037	-82.7533	-72.7679	-128.367	-78.0012	-66.1737	-91.053	-130.414	-91.6331	-115.223	-103.745	-110.289	-70.7537	-81.1348	-80.6179	-73.4637	-87.2911	-79.2416	-105.838	-114.489	-100.578	-98.6535	-71.4707	-87.9499	-78.1137	-64.1507	-81.0237	-58.3585	-117.819	-119.228	-70.9573
Lactobacillus reuteri F275	-81.1103	-133.836	-115.615	-108.995	-133.983	-110.252	-141.342	-88.2187	-132.993	-141.261	-101.695	-120.633	-65.7237	-124.939	-89.4739	-116.634	-126.066	-78.1936	-72.7707	-51.4395	-59.5895	-127.455	-76.8995	-78.978	-106.296	-103.597	-119.16	-115.235	-95.0126	-115.993	-81.2088	-100.54	-105.221	-77.9361	-77.5492	-81.272	-108.683	-110.922	-89.3861	-96.5819	-67.5248	-120.376	-83.0836	-70.7188	-100.149	-96.3614	-104.31	-80.9779	-72.3507
Streptococcus thermophilus CNRZ1066	-86.5841	-120.208	-107.687	-98.211	-112.387	-108.571	-137.318	-78.2398	-127.846	-123.709	-96.9475	-105.322	-84.8973	-124.872	-81.4161	-100.54	-104.332	-104.543	-86.0174	-93.4533	-91.6163	-125.236	-96.1609	-77.2331	-83.5045	-103.297	-99.5162	-115.95	-84.5808	-114.642	-89.0277	-76.6036	-84.3663	-95.0887	-90.8292	-86.0164	-103.21	-103.389	-82.7532	-93.7434	-79.3129	-100.673	-76.4211	-78.8701	-84.2597	-78.2989	-98.8395	-85.4587	-67.0617
Shigella dysenteriae Sd197	-89.4037	-73.9307	-83.2942	-87.738	-86.5862	-102.578	-144.861	-67.5833	-127.315	-136.981	-80.3739	-103.047	-80.7871	-129.657	-77.5128	-134.098	-84.0583	-106.546	-107.636	-70.5651	-74.1104	-119.738	-95.4176	-76.6651	-85.9627	-114.476	-93.109	-127.472	-92.4078	-120.717	-68.7693	-73.4036	-77.3673	-83.4295	-95.9381	-60.3748	-89.7458	-78.5537	-90.9123	-85.9726	-55.801	-75.9981	-98.0085	-71.1946	-69.9253	-49.3274	-109.171	-88.2377	-63.5192
Shigella boydii Sb227	-73.5691	-69.1387	-74.5449	-66.5807	-80.753	-95.9775	-130.181	-65.7225	-107.231	-120.467	-69.6185	-93.0495	-60.4723	-119.51	-70.2194	-105.28	-79.0993	-96.3775	-97.4792	-68.4858	-72.2729	-106.253	-79.0271	-68.5534	-59.6873	-93.329	-89.2856	-106.564	-72.7126	-103.306	-52.3277	-64.633	-59.9066	-52.8728	-80.078	-47.712	-82.6916	-70.5458	-83.4285	-64.6687	-40.8425	-71.2644	-89.7384	-58.9575	-62.7687	-43.296	-97.2012	-72.2369	-54.0486
Shigella sonnei Ss046	-67.7565	-60.6952	-67.0626	-60.317	-72.3448	-93.368	-122.239	-65.4707	-104.773	-114.514	-70.2758	-94.7867	-47.2059	-114.107	-61.0694	-91.9055	-66.7994	-78.7091	-81.9384	-57.0131	-57.5923	-99.4129	-71.6882	-72.5198	-54.5254	-91.6515	-87.8695	-102.953	-73.643	-103.401	-43.4412	-60.1696	-43.0404	-53.9524	-69.2829	-48.153	-83.6101	-66.4238	-78.7191	-53.5307	-39.5396	-76.9034	-85.8427	-55.762	-56.6396	-44.1921	-89.7784	-67.5675	-50.3235
Ehrlichia ruminantium str. Gardel	-45.3833	-71.3905	-65.9666	-60.601	-77.9371	-48.2199	-92.0747	-45.7444	-91.7091	-83.7421	-50.0888	-58.9967	-34.952	-88.2276	-54.2223	-69.4987	-76.7646	-67.2994	-56.0156	-50.717	-44.2737	-82.2928	-55.2998	-45.9842	-61.2528	-45.0176	-60.1133	-74.0356	-51.3664	-77.2765	-69.6732	-59.8027	-58.9423	-52.4145	-57.329	-65.0148	-63.2531	-56.6288	-50.6556	-60.505	-48.464	-51.0441	-51.1984	-26.5933	-57.2177	-39.1336	-69.9048	-48.4437	-45.2442
Corynebacterium jeikeium K411	-63.4993	-118.889	-113.767	-89.5623	-120.439	-93.588	-150.224	-83.3751	-145.132	-117.926	-114.584	-112.996	-58.9238	-152.133	-83.4217	-88.3984	-114.803	-68.9779	-57.04	-76.4242	-61.7158	-131.23	-64.4272	-75.2241	-81.7852	-73.2543	-106.108	-104.57	-72.7972	-122.953	-87.3163	-107.7	-85.6562	-65.7068	-76.2554	-88.248	-106.399	-108.838	-103.354	-91.4379	-78.1715	-114.891	-87.4528	-55.4466	-80.0672	-75.5947	-119.928	-62.4755	-73.8409
Dictyoglomus thermophilum H-6-12	-35.2903	43.0645	50.5264	26.0312	56.8924	8.6911	2.0757	26.9629	-8.47733	31.5797	7.30081	-11.9862	-1.66344	1.51304	13.7716	-34.1595	55.9194	17.7259	4.23112	1.74867	0.588273	-3.88204	8.09055	21.0161	37.7362	-51.9582	25.7534	8.39111	-24.2681	18.6863	72.1353	61.6079	27.8616	43.1409	-2.57406	59.1316	-5.90654	-6.09808	-6.48153	28.4879	35.8439	-2.41603	15.8445	-37.6408	28.9613	21.8873	4.46487	-37.1635	51.0797
Salinibacter ruber DSM 13855	37.5493	-81.5534	-74.673	-51.7731	-77.7711	-82.4601	-99.4851	-70.8802	-93.5805	-102.624	-99.065	-76.4647	-48.8169	-96.6417	-41.807	41.3139	-70.8394	-54.155	-50.4016	-53.0867	-35.2652	-116.181	-48.9164	-90.7556	-67.0917	40.4066	-74.1582	-101.472	34.7578	-95.2273	-65.9859	-78.1843	-66.6713	-41.0716	-64.2126	-57.0079	-115.427	-117.227	-101.208	-65.5049	-46.1251	-94.4727	-102.622	-30.2468	-63.3314	-63.8415	-108.949	37.086	-50.1994
Polynucleobacter sp. QLW-P1DMWA-1	-39.7187	-114.695	-113.25	-56.5319	-117.176	-87.5249	-117.314	-64.095	-111.554	-81.34	-83.8722	-78.0195	-29.9237	-115.368	-41.0332	-35.3671	-102.826	-34.4722	-31.8311	-38.8348	-31.1067	-100.971	-35.1616	-70.3963	-52.7653	-10.845	-79.9157	-92.3103	-17.7421	-96.0225	-78.2909	-67.1659	-52.8611	-54.8097	-27.9703	-81.4497	-94.9764	-92.5614	-79.1797	-61.5318	-54.2382	-76.0658	-73.419	-23.5624	-55.375	-47.4473	-65.1955	-42.6722	-74.1364
Vibrio fischeri ES114	-80.2236	-101.197	-95.8562	-115.378	-106.721	-98.5248	-141.856	-82.2843	-138.396	-128.275	-88.4111	-95.3895	-96.7026	-138.482	-94.9783	-121.61	-101.806	-132.384	-114.809	-100.473	-111.766	-112.325	-112.799	-78.3997	-102.221	-107.767	-115.245	-112.221	-102.338	-118.649	-80.1667	-104.859	-88.4121	-92.8423	-134.981	-79.3874	-84.543	-86.5438	-64.1938	-106.19	-66.772	-80.0797	-88.1295	-66.6222	-93.0142	-76.4176	-119.233	-81.5181	-72.1942
Erythrobacter litoralis HTCC2594	-64.7749	-131.905	-120.228	-100.522	-133.205	-123.459	-152.109	-89.0205	-148.213	-142.4	-123.325	-124.049	-71.4036	-163.563	-95.7021	-95.794	-128.143	-114.734	-89.8427	-80.7802	-85.8376	-154.713	-80.6482	-102.765	-99.9187	-66.9156	-133.619	-141.571	-94.6257	-139.254	-109.622	-115.87	-105.418	-102.907	-93.6325	-98.6941	-134.989	-123.561	-107.267	-102.174	-86.2971	-122.841	-111.093	-70.8598	-101.659	-79.1798	-129.407	-63.384	-83.5893
Alteromonas macleodii 'Deep ecotype'	-82.3795	-116.128	-102.615	-115.158	-113.702	-120.172	-165.065	-88.7429	-161.748	-149.642	-108.743	-111.77	-96.905	-152.952	-85.7283	-104.03	-114.927	-110.952	-105.072	-102.212	-94.2298	-138.444	-92.3792	-102.287	-114.147	-101.764	-130.236	-132.28	-104.642	-145.597	-110.727	-117.672	-109.214	-88.0696	-103.942	-87.9091	-101.451	-105.362	-107.728	-115.113	-69.724	-109.404	-103.288	-93.4664	-100.394	-77.1311	-128.919	-79.8818	-79.4468
Lactobacillus sakei subsp. sakei 23K	-90.026	-131.878	-112.088	-121.271	-131.979	-120.369	-164.541	-107.757	-142.364	-159.206	-132.898	-136.227	-87.0631	-147.196	-91.1396	-118.945	-123.262	-109.287	-94.0075	-80.0046	-84.1355	-140.919	-94.1165	-95.1824	-105.582	-117.195	-130.227	-120.802	-106.797	-125.647	-77.0459	-101.025	-113.594	-90.3025	-102.739	-66.2128	-132.5	-129.82	-110.435	-111.935	-79.4052	-136.514	-109.171	-96.0868	-113.57	-102.022	-121.138	-92.8842	-63.3386
Xanthomonas campestris pv. campestris str. 8004	-79.3588	-105.059	-110.468	-105.443	-127.672	-119.906	-143.975	-90.6839	-147.051	-153.314	-112.584	-105.96	-66.286	-134.328	-72.0771	-147.901	-111.013	-93.1133	-84.2576	-80.3106	-78.1076	-123.142	-83.7955	-98.5036	-96.5443	-119.062	-117.204	-121.392	-111.466	-124.199	-96.222	-85.5548	-98.7985	-78.7184	-79.8683	-89.6393	-117.644	-117.5	-110.362	-95.5248	-78.757	-122.231	-113.681	-70.8164	-95.6737	-77.25	-111.07	-84.0196	-81.9842
Rickettsia felis URRWXCal2	-132.713	-168.244	-149.528	-139.845	-179.355	-149.398	-202.693	-122.776	-185.676	-177.923	-148.655	-163.389	-114.55	-203.181	-112.734	-180.289	-163.051	-147.455	-131.636	-111.722	-116.359	-189.06	-132.619	-137.296	-141.405	-154.284	-155.835	-181.37	-149.232	-169.287	-117.31	-129.465	-135.383	-132.781	-132.453	-119.166	-159.504	-157.247	-149.257	-134.065	-108.508	-150.357	-146.797	-117.6	-143.213	-116.194	-168.152	-135.403	-110.111
Bacillus weihenstephanensis KBAB4	-3.5062	-31.0646	-30.5237	-47.3245	-36.9439	-56.9935	-62.6757	-45.5087	-63.8281	-65.7467	-56.8516	-75.5472	-32.6001	-51.3604	-42.3138	-49.1413	-32.9604	-60.6313	-57.2593	-27.9352	-41.28	-78.0084	-50.9915	-46.4061	-49.0739	-44.783	-70.3164	-37.4124	-45.1252	-48.8638	-33.1891	-47.6358	-44.2234	-58.9587	-54.9595	-42.5279	-40.9499	-42.6371	-29.6757	-58.327	-40.0481	-55.3194	-29.2095	-47.2177	-59.5764	-26.8323	-65.5915	-2.0824	-29.9004
Bacillus pumilus SAFR-032	-14.9043	-59.335	-39.1336	-53.4584	-55.8297	-93.8333	-89.4188	-51.3371	-109.468	-90.9829	-69.5283	-76.2117	-27.0059	-94.474	-39.142	-40.287	-43.8469	-41.357	-47.5198	-42.0853	-45.5231	-96.6986	-38.3276	-72.1751	-56.2224	-49.3658	-91.3435	-61.4797	-38.3616	-72.1445	-57.027	-57.0973	-61.0657	-32.6929	-41.8403	-38.8429	-62.2727	-67.3348	-69.5548	-59.2049	-29.9715	-70.1941	-58.7307	-38.6801	-65.9139	-39.3191	-77.3128	-14.0838	-40.808
Rhodopseudomonas palustris BisA53	-77.4758	-95.4232	-95.7778	-65.3047	-104.149	-71.79	-87.5605	-53.768	-102.128	-85.0377	-76.3926	-69.7615	-56.2188	-97.5508	-66.4146	-83.381	-96.8239	-61.9327	-61.4195	-77.7305	-67.8684	-81.1552	-65.5585	-68.1901	-82.7187	-48.5256	-66.6391	-89.044	-61.8139	-78.0569	-78.3861	-83.9041	-75.8889	-80.6659	-57.1982	-73.785	-76.1259	-68.8769	-60.9158	-70.7963	-70.6441	-55.9712	-75.7409	-47.9065	-58.9881	-61.7534	-46.3682	-78.5758	-63.6388
Herpetosiphon aurantiacus ATCC 23779	-6.67144	-18.4985	-22.895	-34.2605	-24.3022	-55.6196	-50.2898	-45.7542	-73.067	-71.3916	-60.2236	-61.9498	-25.9906	-51.5531	-1.80779	-34.4343	-28.1668	-43.5716	-36.5129	-15.3617	-19.0809	-66.9473	-25.98	-45.4506	-33.8568	-34.5117	-54.7382	-55.7903	-37.2585	-55.8119	-23.6153	-27.0202	-34.9056	-21.3	-40.7304	-26.8856	-87.1941	-72.9056	-68.5173	-33.0218	-21.1198	-56.7468	-44.1553	-18.0168	-32.59	-33.9372	-67.9086	-8.02905	-21.4738
Synechococcus sp. RCC307	-70.2686	-125.963	-110.056	-81.263	-112.987	-90.5401	-160.004	-73.693	-130.947	-140.941	-90.3107	-111.066	-60.1928	-146.356	-77.3798	-94.1719	-122.571	-85.1095	-74.3298	-78.3013	-68.6133	-139.011	-72.3519	-81.643	-85.4888	-77.7488	-98.369	-118.993	-51.2146	-123.222	-89.8371	-97.3135	-77.9201	-74.6399	-81.0381	-86.4965	-107.823	-98.1429	-110.051	-83.2851	-68.7317	-81.4169	-95.5725	-47.1257	-76.3093	-74.4582	-103.527	-71.5052	-81.2338
Synechococcus sp. CC9902	-56.8362	-117.128	-112.487	-75.6586	-107.93	-83.291	-146.768	-65.8782	-130.285	-135.185	-84.5073	-94.2776	-59.0988	-139.005	-69.0728	-88.1736	-108.293	-61.3507	-69.1243	-78.9435	-74.2799	-126.749	-66.7827	-69.8219	-85.8607	-64.2536	-90.3992	-118.506	-51.3311	-119.194	-81.3938	-90.5452	-79.6783	-78.3464	-69.616	-84.3141	-100.155	-98.0255	-105.463	-86.0751	-65.8323	-78.2388	-86.8786	-34.0005	-80.6333	-63.7364	-99.6227	-60.9205	-80.5092
Thiomicrospira crunogena XCL-2	-32.9457	-88.1745	-85.9471	-76.6853	-94.8357	-71.6487	-74.5127	-45.0944	-64.8448	-100.976	-66.9635	-44.5886	-66.039	-74.1569	-65.4847	-67.0566	-90.7469	-76.9868	-63.5245	-70.8409	-64.1585	-79.3248	-74.0176	-61.8493	-80.8949	-35.7975	-79.4043	-79.7572	-34.7297	-91.4982	-85.7374	-92.9234	-74.351	-73.6205	-68.8631	-70.2621	-55.9812	-49.1763	-55.5941	-77.3585	-64.4266	-55.4561	-72.4273	-36.3313	-68.5782	-47.1279	-73.1938	-29.9639	-61.6913
Sphingopyxis alaskensis RB2256	-73.3736	-125.498	-122.213	-95.6362	-133.865	-122.721	-154.662	-85.6168	-151.825	-126.41	-98.9508	-132.647	-55.4706	-163.412	-81.174	-86.1561	-132.758	-79.8092	-77.7795	-63.0635	-64.9717	-143.201	-79.8769	-97.093	-98.1263	-57.4331	-133.311	-133.723	-94.2777	-127.333	-85.8763	-102.968	-113.549	-83.1886	-87.4939	-93	-127.708	-118.094	-106.545	-102.264	-77.0694	-114.54	-116.831	-52.8911	-106.378	-72.0041	-117.007	-74.138	-83.6117
Shewanella denitrificans OS217	-96.249	-139.355	-135.074	-117.046	-143.865	-133.76	-168.836	-94.8578	-172.609	-156.775	-113.015	-119.407	-95.0085	-171.659	-98.679	-140.247	-134.917	-144.073	-127.84	-101.918	-98.279	-155.138	-117.746	-121.848	-118.853	-124.295	-134.385	-147.519	-128.06	-145.516	-112.188	-112.06	-104.344	-110.402	-118.083	-90.6835	-122.974	-122.002	-107.455	-118.827	-81.9507	-113.683	-116.499	-92.2789	-115.06	-92.9216	-129.906	-97.49	-80.5631
Shewanella frigidimarina NCIMB 400	-84.2397	-118.673	-105.183	-108.401	-120.24	-102.763	-142.929	-83.5193	-135.749	-123.795	-91.5414	-108.25	-86.91	-145.935	-96.9671	-105.027	-118.44	-117.566	-108.901	-97.2867	-88.3515	-131.807	-103.156	-95.9972	-106.366	-76.3268	-121.773	-125.327	-103.314	-138.985	-104.159	-100.232	-98.6157	-102.236	-96.8245	-84.5104	-95.1632	-95.0874	-85.3392	-108.331	-69.2563	-87.2046	-91.9573	-96.6973	-94.8638	-67.8667	-117.185	-88.7074	-71.0916
Paracoccus denitrificans PD1222	-52.7087	-101.517	-81.8882	-62.3736	-97.2816	-93.7559	-111.566	-68.287	-110.722	-91.3179	-81.8316	-91.9243	-68.2131	-107.179	-39.6942	-60.619	-97.0542	-69.3876	-65.0858	-65.6393	-62.5667	-109.634	-58.3943	-66.8547	-64.8807	-43.6859	-81.7467	-101.536	-54.6887	-102.513	-69.0628	-63.0159	-61.4703	-65.0775	-67.5849	-67.8815	-87.6985	-88.4276	-65.7686	-56.0006	-51.9372	-72.3833	-63.4894	-51.0529	-59.3545	-66.3775	-104.231	-47.9401	-58.5981
Shewanella putrefaciens CN-32	-90.6855	-124.046	-121.59	-112.366	-133.601	-104.198	-155.372	-88.2092	-126.38	-136.634	-97.2599	-110.53	-77.5577	-150.541	-90.932	-127.31	-123.77	-127.689	-115.313	-100.032	-91.1588	-131.927	-104.499	-94.5961	-97.2987	-130.369	-118.133	-123.02	-114.507	-123.14	-105.384	-101.628	-94.7952	-102.1	-99.3061	-89.9649	-90.7607	-92.7038	-88.8001	-109.263	-65.617	-93.9255	-94.4981	-87.647	-91.1359	-80.5011	-106.177	-89.1069	-79.605
Pelodictyon luteolum DSM 273	-28.2521	-48.1497	-54.6082	-48.9606	-43.6404	-13.9613	10.9911	-33.4211	10.7979	-41.8476	-33.2612	3.41456	-29.347	4.95751	-43.3705	-55.0749	-51.2494	-37.9661	-43.2836	-30.2001	-29.475	-23.576	-38.6218	-22.8004	-49.1924	-46.4664	-13.3699	-10.9132	-39.3138	-22.5811	-46.5775	-35.526	-45.2573	-22.2191	-31.4337	-53.7048	-21.4658	-29.0301	-20.6319	-48.9427	-29.5121	-23.4709	-21.8522	-13.9702	-31.7569	-25.7537	-3.7247	-27.2087	-46.3783
Deinococcus geothermalis DSM 11300	6.12577	-40.0565	-47.2201	-13.0241	-47.3728	-86.5298	-110.464	-61.68	-95.3402	-51.1258	-69.9988	-79.4571	-1.12215	-102.75	2.96558	13.9763	-47.2935	-11.9267	-6.76593	-12.3035	-15.328	-98.3374	-2.64055	-62.6091	-13.442	-9.47647	-75.7948	-61.5825	-5.97517	-91.7737	-43.662	-35.8897	-29.6852	-17.4423	-7.54259	-26.5093	-87.9387	-82.4637	-85.345	-16.6664	-31.2246	-80.535	-84.0388	-26.3382	-32.8286	-35.8914	-82.0429	5.48073	-21.3363
Synechococcus sp. JA-3-3Ab	-37.311	-108.05	-100.57	-45.7377	-96.2283	-65.1119	-127.682	-57.3712	-110.208	-99.1131	-67.4686	-90.3683	-61.47	-116.131	-45.1993	-67.5394	-107.383	-64.9787	-55.7014	-62.1484	-62.3684	-106.671	-66.0955	-71.8354	-54.0284	-49.5933	-62.6076	-90.349	-23.6578	-88.9622	-71.9172	-75.0228	-48.0593	-58.0266	-67.5044	-64.3361	-86.216	-86.1257	-93.8196	-49.5206	-42.2448	-67.8183	-82.4922	-36.2859	-50.8953	-59.264	-93.5391	-38.7164	-64.6556
Synechococcus sp. JA-2-3B'a(2-13)	-40.0425	-98.4949	-97.4683	-43.9339	-98.7273	-61.3418	-115.318	-56.4413	-100.246	-99.9642	-62.6539	-93.6269	-67.1072	-109.359	-38.8112	-58.0683	-110.767	-68.7728	-48.8318	-56.2217	-60.3823	-104.503	-65.3943	-63.4707	-44.2643	-37.5204	-54.1183	-102.044	-12.0091	-100.459	-70.7795	-70.0021	-48.6658	-60.2407	-58.6432	-61.6449	-96.2459	-81.0052	-93.1031	-47.6487	-46.8435	-72.0823	-81.417	-42.3813	-49.2566	-54.4323	-89.2443	-38.5292	-60.7867
Lactobacillus delbrueckii subsp. bulgaricus ATCC BAA-365	-104.562	-133.706	-103.484	-121.455	-132.425	-129.816	-171.093	-96.4887	-165.24	-159.693	-138.628	-132.544	-100.891	-161.148	-100.507	-139.975	-118.402	-109.262	-110.056	-98.5986	-100.554	-145.311	-110.053	-103.184	-114.861	-130.324	-127.375	-128.312	-110.352	-143.526	-85.6565	-104.639	-109.422	-113.244	-102.406	-82.5762	-133.279	-130.23	-117.35	-124.75	-83.3466	-125.77	-105.22	-109.034	-110.758	-97.8866	-126.597	-106.351	-78.0563
Lactobacillus casei ATCC 334	-107.947	-160.44	-134.896	-128.206	-164.624	-152.478	-197.423	-110.608	-192.883	-187.655	-153.72	-165.851	-99.9836	-178.828	-96.5997	-163.48	-144.765	-128.618	-123.268	-100.599	-98.8129	-157.217	-121.681	-122.136	-122.5	-148.361	-157.005	-147.986	-132.361	-167.47	-86.2356	-123.358	-130.463	-105.495	-124.073	-88.5945	-164.563	-152.456	-137.192	-133.98	-92.5349	-149.079	-127.825	-122.742	-129.273	-109.51	-147.067	-109.361	-81.8944
Aster yellows witches'-broom phytoplasma AYWB	-97.954	-112.453	-98.0147	-95.6792	-111.895	-106.527	-138.093	-86.404	-127.855	-128.453	-104.064	-117.526	-93.0888	-132.24	-79.5091	-126.237	-104.579	-107.412	-104.844	-87.9881	-90.4309	-132.241	-100.751	-83.4938	-95.7668	-114.587	-108.138	-113.025	-102.915	-130.056	-74.8092	-82.9723	-90.8467	-97.7557	-103.528	-76.2977	-115.612	-115.593	-105.057	-93.7403	-68.3498	-107.059	-93.1596	-95.2041	-91.5913	-82.005	-116.765	-98.3067	-66.3657
Nitrobacter hamburgensis X14	-104.582	-133.521	-126.915	-105.245	-139.143	-114.319	-159.168	-91.9068	-158.095	-142.208	-112.781	-110.478	-90.3717	-147.388	-88.9062	-154.111	-138.515	-91.6552	-96.55	-97.3326	-89.0712	-139.784	-98.1462	-103.792	-97.3756	-116.615	-105.674	-134.39	-113.903	-127.821	-98.8378	-101.009	-99.4261	-102.617	-103.09	-103.062	-129.92	-116.764	-97.7474	-94.3618	-91.2542	-108.423	-110.011	-68.6372	-86.2251	-87.5163	-111.831	-106.284	-83.3585
Nitrobacter winogradskyi Nb-255	-81.0803	-129.777	-125.711	-86.3067	-143.119	-117.128	-149.032	-97.655	-140.558	-133.743	-116.986	-105.556	-78.755	-138.057	-68.0735	-114.996	-136.021	-85.3035	-75.7208	-82.643	-85.6129	-122.768	-80.7036	-106.859	-93.7587	-83.3961	-100.553	-128.628	-89.5719	-121.05	-94.2486	-90.4232	-87.6027	-86.7848	-89.4709	-93.7442	-126.337	-123.792	-101.95	-86.9383	-89.6329	-108.55	-116.442	-40.5887	-73.5927	-76.9505	-117.511	-82.7827	-83.4657
Nitrosococcus oceani ATCC 19707	-56.0713	-103.069	-88.3692	-74.7341	-92.3707	-68.6112	-82.4426	-62.1146	-72.5145	-89.6443	-77.4218	-46.2492	-61.646	-71.8727	-48.89	-66.2487	-86.3061	-72.0426	-53.1137	-58.9949	-60.0477	-103.944	-64.9289	-58.8852	-76.134	-57.2768	-65.7862	-86.8556	-51.9571	-69.4699	-78.7688	-76.0143	-69.5971	-78.1239	-68.9018	-64.8095	-77.1244	-78.6902	-71.4201	-78.3853	-62.4283	-75.9408	-76.2277	-35.0688	-69.8251	-53.2812	-75.6387	-57.6853	-71.6951
Nitrosospira multiformis ATCC 25196	-68.8856	-111.616	-107.884	-85.6283	-115.819	-96.5817	-120.675	-84.3182	-114.934	-130.301	-107.473	-104.307	-68.5501	-107.944	-73.8205	-81.3541	-116.918	-87.5709	-73.9995	-78.9736	-67.1687	-111.866	-70.468	-80.04	-92.9359	-73.7011	-106.203	-94.9194	-79.5072	-104.003	-82.2046	-98.373	-87.6882	-82.9212	-69.8086	-78.3784	-107.605	-105.445	-103.315	-86.3783	-64.4163	-103.859	-103.827	-38.1292	-85.4155	-75.2521	-86.667	-67.3265	-80.6186
Shewanella loihica PV-4	-83.4505	-110.713	-99.3374	-96.2023	-119.245	-101.992	-131.105	-84.5439	-136.499	-106.203	-95.6507	-107.989	-78.7587	-143.606	-78.788	-103.714	-108.352	-116.83	-104.04	-95.4457	-85.6948	-104.052	-95.0829	-84.7355	-93.0695	-86.3049	-117.772	-119.272	-101.757	-117.344	-89.7755	-89.3504	-84.0715	-95.7375	-95.1657	-67.8229	-91.8872	-92.8716	-86.6442	-100.036	-59.2808	-84.3191	-84.5134	-76.4553	-85.6024	-60.7206	-114.05	-81.779	-69.5843
Chloroflexus aurantiacus J-10-fl	24.7272	-25.6386	-8.26794	9.91703	-14.1697	-21.9248	-34.9242	-28.5066	-29.3397	-39.0687	-45.6163	-31.9027	15.3944	-30.4439	30.3294	36.5917	-18.273	0.379691	-3.86116	6.69539	-5.56013	-30.9471	-8.89649	-33.6872	2.05325	13.918	-36.6963	-24.1205	17.4489	-34.2434	-3.68731	-14.2794	-3.97618	-5.60776	0.00607606	-1.75992	-69.8378	-67.8245	-45.5794	-4.91326	-7.20719	-56.2847	-30.4581	-12.3347	-11.5174	-25.677	-59.9317	20.4037	-8.52786
Lactobacillus gasseri ATCC 33323	-112.222	-151.406	-126.368	-137.555	-152.213	-138.374	-177.129	-108.321	-182.987	-169.406	-143.18	-160.015	-99.8282	-183.104	-109.886	-150.597	-131.796	-113.598	-116.163	-98.1467	-109.145	-161.974	-104.178	-121.637	-131.939	-136.503	-144.984	-140.683	-121.22	-154.862	-73.7763	-109.455	-130.398	-107.171	-125.598	-84.538	-152.468	-158.283	-124.024	-134.708	-88.3935	-145.419	-124.89	-119.96	-133.656	-109.444	-140.551	-113.025	-77.9418
Pelodictyon phaeoclathratiforme BU-1	-68.1824	-72.1061	-74.9472	-73.4278	-69.2523	-39.2837	-30.0168	-46.1821	-34.8644	-69.4363	-46.1981	-42.9572	-67.948	-41.6788	-59.2314	-101.939	-69.484	-74.8507	-65.9222	-52.9395	-54.1864	-33.9508	-62.2285	-38.3249	-73.7002	-86.825	-42.6279	-39.1994	-91.2031	-45.4353	-52.3487	-45.3558	-57.0605	-53.7206	-46.7127	-69.0579	-55.4672	-55.4632	-37.9556	-65.2553	-41.8119	-47.4998	-45.8216	-42.038	-52.0255	-40.0319	-42.922	-71.5466	-61.4726
Shewanella baltica OS155	-90.1336	-122.833	-121.198	-126.562	-131.486	-114.49	-156.602	-95.5364	-146.089	-140.786	-101.333	-116.939	-86.5444	-153.428	-105.328	-150.6	-129.95	-138.196	-127.345	-114.334	-104.894	-125.603	-125.113	-101.605	-106.78	-125.132	-134.009	-129.255	-126.089	-122.586	-108.632	-102.306	-112.231	-107.23	-115.665	-94.2822	-94.6893	-96.4996	-101.832	-116.788	-68.6919	-102.959	-101.939	-98.0141	-100.806	-80.271	-117.007	-91.9579	-79.4376
Shewanella amazonensis SB2B	-84.7103	-107.808	-103.649	-99.6468	-111.294	-105.353	-154.181	-77.0658	-150.37	-134.066	-95.273	-109.591	-79.9897	-156.352	-80.3616	-113.284	-103.295	-109.985	-92.3457	-88.1577	-84.633	-127.954	-88.1041	-94.8246	-84.3899	-90.8766	-117.804	-116.434	-101.99	-125.436	-94.4364	-96.6016	-87.4102	-83.8227	-86.7028	-77.4127	-98.9052	-95.9851	-93.0869	-105.378	-55.4711	-96.9371	-96.3307	-82.8643	-90.3253	-70.0065	-109.494	-83.8593	-63.4211
Sulfurimonas denitrificans DSM 1251	-83.4013	-94.1251	-84.3761	-64.8829	-90.637	-72.8968	-84.5035	-49.1188	-91.5961	-95.9393	-46.0922	-67.7993	-72.2589	-82.4937	-82.0968	-94.6021	-79.1579	-75.0308	-65.2586	-61.9872	-69.2683	-80.8751	-74.6138	-56.6653	-70.1114	-91.806	-70.3443	-84.21	-93.5459	-81.7799	-72.194	-72.2989	-55.1088	-62.1005	-75.4321	-68.2528	-46.5128	-43.0327	-58.6013	-68.827	-53.1009	-41.3364	-56.7797	-29.8477	-51.5774	-36.4098	-66.862	-86.3647	-65.898
Bacillus amyloliquefaciens FZB42	-10.2967	-48.5072	-43.2919	-50.7247	-58.0045	-75.99	-90.8245	-46.4253	-92.828	-84.2837	-60.6111	-69.4139	-16.3404	-87.8413	-29.3988	-36.9472	-34.0272	-47.8095	-25.9068	-16.3909	-33.8162	-95.9417	-25.7308	-58.2892	-44.4957	-36.8555	-93.5193	-51.8222	-44.8126	-57.3759	-41.2212	-59.2593	-50.2805	-17.9789	-28.2148	-27.9839	-58.392	-67.4482	-60.7072	-48.4765	-26.1356	-65.2774	-41.8608	-29.9479	-63.1066	-36.421	-59.5809	-11.4863	-30.9348
Frankia alni ACN14a	-102.589	-109.281	-101.943	-87.6911	-108.389	-80.8034	-141.631	-73.1432	-136.456	-135.671	-108.208	-122.642	-88.5832	-141.093	-59.9092	-137.351	-112.709	-102.468	-81.9849	-88.1155	-76.51	-143.054	-87.2893	-74.4347	-74.7901	-129.977	-92.5351	-122.787	-115.542	-131.947	-85.7857	-82.985	-76.0089	-74.7735	-97.3272	-67.0242	-124.376	-114.032	-115.882	-77.2886	-71.0954	-106.513	-78.3643	-65.9035	-72.6537	-58.6988	-118.023	-103.676	-68.9143
Pseudoalteromonas haloplanktis TAC125	-65.0816	-130.245	-120.32	-111.794	-136.694	-132.012	-168.279	-98.7286	-170.12	-142.702	-115	-126.556	-98.2299	-174.986	-99.7017	-102.962	-119.632	-118.614	-114.873	-93.8339	-87.4714	-161.331	-108.406	-101.098	-112.445	-92.8783	-133.185	-151.442	-99.5505	-156.999	-119.656	-120.214	-106.279	-97.7221	-108.38	-92.3659	-117.073	-109.243	-104.793	-120.467	-81.0966	-119.65	-107.365	-71.0036	-114.503	-97.4792	-127.561	-69.0943	-87.5749
Acaryochloris marina MBIC11017	-92.2742	-95.6458	-89.5637	-93.9305	-86.1511	-54.7551	-84.1949	-51.1165	-76.7141	-138.416	-46.8904	-65.564	-88.7968	-77.5114	-91.7142	-127.1	-86.6795	-130.531	-107.455	-93.0068	-85.202	-73.9037	-118.306	-49.7896	-95.3938	-94.7922	-59.8628	-80.8564	-78.7304	-71.9051	-85.6695	-74.4532	-75.7402	-95.7	-113.033	-63.6833	-62.7715	-62.4225	-78.9031	-90.2141	-67.1383	-47.9354	-53.6871	-51.4339	-78.6999	-49.7537	-85.2704	-96.9272	-58.0432
Burkholderia cenocepacia AU 1054	-64.7162	-82.6785	-80.297	-67.5067	-87.7342	-87.2778	-112.982	-64.8237	-93.0559	-95.3875	-82.9414	-84.0838	-36.6854	-98.6708	-59.4642	-69.3051	-82.0017	-55.3963	-43.534	-30.1481	-27.7391	-110.321	-48.7309	-66.0434	-65.5379	-75.5144	-77.9352	-92.4302	-73.2157	-92.2004	-57.7159	-71.357	-62.1195	-51.2973	-44.1612	-72.3614	-83.1203	-79.78	-74.489	-57.984	-56.3375	-77.2828	-78.9594	-62.6578	-58.8971	-57.3445	-82.0246	-63.7025	-61.3452
Nitrosomonas eutropha C91	-70.3351	-128.686	-120.647	-78.0681	-128.723	-91.2244	-111.291	-82.1556	-110.129	-130.879	-97.8206	-85.9677	-59.0458	-117.579	-79.0487	-94.6942	-116.266	-89.1483	-77.2607	-79.0436	-72.3511	-122.013	-75.3091	-84.2271	-89.2973	-81.0219	-95.1026	-105.103	-81.3819	-107.149	-88.3787	-94.9195	-85.6293	-80.4323	-90.9795	-88.9494	-103.51	-101.797	-99.7535	-87.0687	-75.2338	-83.9478	-108.213	-49.9037	-87.9788	-76.9243	-106.463	-73.5831	-83.6558
Psychrobacter cryohalolentis K5	-60.6485	-120.854	-121.15	-76.0368	-116.859	-106.49	-140.043	-94.98	-122.145	-122.51	-116.522	-107.682	-55.8978	-141.49	-73.3637	-59.8666	-113.505	-67.5354	-70.9178	-61.175	-50.4931	-137.476	-61.9006	-81.7434	-83.2579	-48.8165	-112.244	-109.301	-48.4428	-132.802	-100.013	-93.3862	-85.8379	-81.435	-68.6092	-90.8055	-107.762	-111.134	-101.972	-85.0926	-77.9665	-107.596	-81.5877	-62.9416	-78.2867	-78.742	-110.097	-62.868	-78.5894
Syntrophomonas wolfei subsp. wolfei str. Goettingen	-96.1712	-57.5252	-43.8817	-55.6749	-74.5236	-12.1781	-42.4636	-24.7677	-15.6124	-44.0877	-41.2867	-23.2718	-74.5166	-47.9381	-43.0644	-115.189	-52.1897	-81.0727	-55.5024	-59.8435	-66.1633	6.97886	-66.4738	-22.4756	-58.8947	-105.248	-17.9109	-39.8009	-111.921	-2.38066	-41.7699	-32.1116	-45.518	-65.0798	-67.1887	-27.6012	-39.4464	-41.8329	-10.6521	-60.7409	-32.7405	-36.3503	-20.2948	-65.5924	-51.9842	-35.5292	-16.6746	-98.3858	-30.3988
Syntrophobacter fumaroxidans MPOB	-43.1695	0.955559	5.46466	15.9816	-2.61738	35.9027	44.144	33.2981	46.4358	66.5138	36.2935	29.3252	-29.7215	52.2351	-4.58791	-70.6601	-7.83781	-32.6958	-26.8563	-17.0412	-15.0678	85.6729	-32.1535	7.76647	16.9968	-49.4991	61.8487	46.8952	-26.3971	71.5154	-4.6225	19.4088	23.8958	0.0840359	-23.736	-8.83577	28.6013	28.688	41.3432	21.0311	0.362095	40.6321	20.7722	-30.3248	32.7036	10.9174	66.2155	-45.6654	-5.38148
Candidatus Pelagibacter ubique HTCC1062	-19.2719	-54.0461	-61.8008	-15.5515	-53.6501	-34.2707	-64.8657	-29.6141	-63.3085	-53.0412	-36.8345	-43.1099	3.56022	-55.657	-20.4415	-6.52241	-65.5798	-18.43	-9.62857	-19.4787	-17.8173	-66.004	-8.74078	-32.6564	-22.2231	0.522661	-46.8806	-63.3598	10.1591	-61.5877	-61.8176	-35.923	-28.2667	-16.3583	-9.07971	-57.3846	-35.1174	-34.3178	-46.7944	-30.4677	-45.5472	-38.5667	-35.6655	2.71818	-29.5395	-23.7407	-55.9316	-19.8617	-51.6762
Rickettsia bellii RML369-C	-123.637	-160.872	-141.499	-135.935	-169.719	-139.55	-195.325	-117.954	-175.066	-165.172	-138.424	-153.311	-109.246	-188.97	-107.901	-162.933	-154.588	-137.154	-127.873	-108.407	-107.892	-172.574	-122.907	-121.671	-138.556	-143.957	-144.047	-169.958	-145.657	-155.546	-113.935	-120.98	-133.594	-125.337	-121.489	-113.159	-147.881	-151.887	-133.202	-125.526	-102.389	-145.088	-134.433	-103.197	-127.645	-108.272	-148.691	-126.278	-112.287
Vibrio harveyi ATCC BAA-1116	-79.7162	-87.4058	-94.9389	-108.982	-96.3662	-100.166	-151.441	-73.1713	-139.043	-142.645	-82.4005	-104.871	-98.7015	-150.616	-97.4331	-145.83	-87.514	-137.043	-135.439	-115.069	-113.047	-134.731	-133.407	-85.2363	-109.873	-123.273	-118.663	-131.516	-124.278	-132.593	-89.4812	-91.0296	-94.224	-107.185	-143.622	-65.9699	-83.5636	-87.2346	-77.6267	-105.218	-71.7302	-77.8094	-92.1072	-80.0048	-103.284	-71.604	-120.88	-84.4962	-78.1471
Pelobacter carbinolicus DSM 2380	-59.9701	-39.8065	-54.1346	-38.2562	-58.2201	7.22684	49.1732	2.57285	16.7492	-42.6809	11.2612	43.3606	-51.9475	24.9987	-51.4025	-96.6595	-59.1245	-77.9539	-56.9849	-51.9707	-41.7368	12.1195	-71.3221	-9.4211	-42.8318	-74.5537	14.3073	3.18302	-57.7363	25.2616	-37.133	-30.9703	-29.3772	-55.9981	-57.599	-40.4783	24.7375	30.4781	32.4177	-35.8974	-33.9168	15.6323	-5.46196	-26.4757	-25.8709	-27.0129	7.11202	-58.8688	-32.8656
Pelobacter propionicus DSM 2379	-65.7979	-36.0167	-28.6884	-47.0912	-38.5377	2.63873	45.5783	-6.19331	39.9877	-40.9523	7.67312	18.8205	-60.3368	32.9096	-59.6978	-108.883	-29.6154	-83.8836	-63.3833	-55.1372	-44.4451	41.9289	-73.3551	4.71798	-49.9266	-99.2335	7.93873	15.1446	-91.8468	26.5937	-42.9555	-38.6874	-31.1826	-59.5317	-57.5715	-39.2359	11.5781	10.5715	35.964	-48.8961	-34.5952	9.00454	3.00511	-41.3329	-27.8092	-30.3116	36.0519	-67.0807	-30.0585
Rhodoferax ferrireducens T118	-44.6249	-71.2801	-60.6558	-53.5798	-66.9199	-70.9978	-85.1485	-55.2719	-87.8227	-54.6939	-67.1021	-80.326	-49.1924	-90.1425	-41.2961	-24.8298	-58.3444	-54.2545	-53.7243	-57.0524	-48.6898	-84.8383	-49.4188	-55.2633	-38.76	-27.2109	-73.4474	-61.0431	-56.3077	-80.8427	-29.8685	-40.7583	-46.4671	-64.119	-49.1409	-53.7647	-63.3688	-81.1931	-68.3774	-44.7578	-37.082	-67.7352	-78.5498	-52.0051	-38.1379	-43.9536	-62.0881	-49.3963	-48.9804
Burkholderia ambifaria AMMD	-52.8014	-81.0265	-81.6704	-71.1926	-85.1119	-86.5816	-103.938	-65.0074	-93.8678	-97.1312	-81.0943	-87.4075	-38.7823	-109.495	-58.2993	-76.6431	-73.4105	-49.1683	-45.9487	-34.2833	-32.7617	-102.746	-43.2079	-69.2687	-68.263	-76.9406	-85.2822	-90.217	-77.5625	-99.6331	-64.3337	-68.7201	-60.6345	-54.151	-51.4128	-66.7443	-84.2688	-70.9261	-70.7175	-63.7391	-58.7761	-84.415	-84.1933	-64.3792	-63.3352	-58.549	-75.6035	-50.8457	-59.6741
Actinobacillus succinogenes 130Z	-66.8967	-82.8467	-90.3698	-64.675	-89.3308	-88.6707	-95.5461	-80.204	-109.77	-112.509	-76.0023	-87.2085	-56.0649	-104.593	-59.1458	-77.6033	-89.9674	-71.637	-73.9821	-68.9567	-63.2297	-95.1729	-59.3152	-62.5313	-59.9079	-82.0524	-103.067	-81.5116	-68.9329	-96.2091	-51.3866	-73.2862	-55.9934	-49.9464	-59.125	-61.5349	-75.1399	-65.718	-53.3308	-50.669	-57.3297	-77.2012	-71.5638	-53.6985	-58.5026	-64.5497	-86.3722	-66.8513	-47.2172
Mycoplasma capricolum subsp. capricolum ATCC 27343	-73.5408	-90.4359	-84.6949	-81.6274	-94.8588	-109.486	-128.508	-74.556	-125.781	-123.229	-94.5427	-102.527	-77.8775	-127.591	-72.4636	-108.575	-87.495	-93.7436	-87.3493	-70.0522	-76.4705	-112.513	-81.4068	-77.3489	-84.0488	-98.5028	-98.8309	-107.76	-86.4916	-113.038	-64.0057	-79.1672	-77.8028	-74.8353	-90.1884	-61.1962	-95.2398	-95.4145	-86.9492	-79.2756	-63.9581	-89.647	-87.0853	-86.0449	-77.2699	-68.2713	-100.136	-74.2655	-54.8336
Thermoanaerobacter pseudethanolicus ATCC 33223	-24.7848	36.7751	38.629	-12.7097	47.0513	-8.56501	-14.3985	-16.209	-18.3815	-3.54016	-12.4272	-4.3988	2.91358	-20.8729	0.100421	-31.263	42.3877	6.41334	-4.80042	7.5261	-4.8021	-27.4465	-11.3622	10.514	-10.9144	-41.3051	9.5308	-11.9907	-25.8699	-15.301	18.2435	3.62003	-20.1043	5.46816	-0.207776	29.9734	-3.15379	-10.2068	-6.61152	-9.26868	1.65923	-13.0257	14.7288	-32.2208	-15.2167	-11.1555	-9.86419	-23.8303	14.6441
Bordetella petrii DSM 12804	-95.926	-121.255	-108.621	-82.8737	-120.009	-123.524	-150.842	-85.1623	-150.098	-125.768	-116.727	-109.647	-71.4847	-147.546	-73.1398	-112.099	-113.758	-86.2987	-76.1914	-65.9294	-74.9092	-135.281	-77.4585	-96.6954	-86.3578	-78.6772	-115.481	-116.936	-98.7486	-115.165	-73.6553	-80.7483	-86.0889	-88.4924	-83.7607	-90.6162	-113.563	-106.297	-108.566	-74.4668	-69.6244	-112.285	-95.3104	-76.5336	-89.0255	-75.2278	-115.783	-100.125	-82.3663
Chlorobium chlorochromatii CaD3	-37.8889	-68.7461	-66.5807	-55.0092	-65.0956	-26.8151	-30.3566	-35.7911	-37.1857	-58.7916	-34.7025	-24.6342	-33.501	-34.6506	-46.7054	-77.3599	-70.3018	-57.1682	-47.0443	-44.1549	-37.3833	-19.099	-47.2824	-28.0729	-49.2665	-53.906	-37.9897	-40.5356	-57.4353	-45.7558	-55.5939	-45.4816	-51.7342	-41.5455	-42.0396	-63.1424	-47.5206	-55.3727	-25.2613	-52.2431	-41.6991	-29.6868	-41.7213	-11.3152	-45.4254	-28.4278	-26.3458	-41.8047	-54.9941
Corynebacterium glutamicum R	-91.1163	-138.729	-119.801	-99.9101	-133.055	-123.154	-164.85	-94.0623	-176.591	-141.142	-126.387	-146.278	-76.1409	-175.036	-87.8237	-95.9443	-127.967	-76.2308	-72.908	-79.2079	-79.2119	-154.286	-72.8242	-92.0988	-105.341	-92.9937	-125.481	-122.766	-74.3673	-136.662	-77.277	-97.4873	-103.431	-87.3501	-79.6754	-86.9892	-133.488	-124.985	-122.973	-99.5475	-88.7713	-119.935	-96.5883	-67.2111	-102.515	-89.3056	-125.003	-90.7832	-81.7754
Magnetospirillum magneticum AMB-1	-105.566	-114.351	-111.708	-69.4929	-113.017	-80.9517	-115.974	-70.7836	-98.2835	-92.8193	-70.5478	-89.5102	-90.8343	-131.64	-83.3114	-152.249	-111.521	-100.058	-85.8952	-72.5617	-73.0446	-88.3178	-77.7342	-68.9236	-75.7474	-105.959	-83.5358	-106.399	-120.784	-104.282	-89.3599	-80.8218	-66.9525	-77.2874	-71.1189	-96.7726	-81.9854	-72.7831	-90.2551	-60.7662	-81.2701	-65.1658	-72.3031	-66.971	-60.4362	-62.5682	-84.8732	-104.442	-80.8701
Staphylococcus saprophyticus subsp. saprophyticus ATCC 15305	-24.8523	-79.9945	-74.2644	-68.1913	-74.0012	-91.6227	-96.29	-57.0704	-95.3721	-96.6904	-73.6223	-95.8574	-25.0607	-97.7249	-45.4915	-23.1562	-65.64	-44.7332	-47.0953	-19.3166	-22.634	-103.67	-42.083	-55.8574	-63.4129	-32.0595	-86.3866	-68.514	-14.6656	-83.9811	-64.1167	-66.5034	-66.9744	-42.5867	-44.7889	-52.8926	-72.8969	-59.2618	-59.109	-74.2428	-63.0629	-81.7	-46.7125	-34.0908	-67.4157	-53.8326	-73.2777	-22.074	-49.6707
Pseudoalteromonas atlantica T6c	-73.5458	-116.13	-103.536	-113.565	-105.744	-118.97	-152.158	-87.7182	-147.211	-134.45	-99.6148	-106.04	-79.4517	-158.49	-78.2036	-98.2377	-117.09	-104.348	-101.455	-95.4664	-85.2545	-132.24	-85.0014	-91.5479	-103.671	-94.2994	-119.277	-129.545	-82.6852	-124.294	-96.316	-102.624	-97.8946	-71.8557	-104.055	-76.7039	-110.686	-104.541	-100.421	-112.653	-73.833	-99.2607	-96.7321	-72.9419	-104.758	-86.2909	-122.187	-72.2128	-73.0415
Sodalis glossinidius str. 'morsitans'	-102.988	-130.088	-124.341	-102.294	-135.096	-130.711	-180.455	-99.1305	-165.523	-154.81	-127.689	-134.974	-85.1691	-170.881	-88.5766	-136.349	-127.729	-121.865	-110.213	-95.4109	-90.7278	-168.799	-108.205	-100.933	-102.516	-129.221	-122.481	-147.656	-116.814	-152.1	-94.1858	-106.581	-90.0652	-89.6877	-110.909	-93.9506	-129.986	-127.347	-127.2	-99.3428	-70.1271	-116.769	-114.795	-79.19	-96.5016	-83.8929	-132.398	-106.211	-80.7248
Vibrio cholerae O395	-70.9214	-97.9095	-102.521	-111.518	-104.445	-101.17	-145.583	-73.6425	-141.921	-128.558	-90.7414	-104.217	-91.1649	-138.036	-95.0992	-113.524	-98.5602	-119.388	-109.514	-82.8202	-91.052	-138.328	-100.577	-81.863	-100.395	-98.8958	-109.973	-109.675	-100.302	-132.608	-81.0094	-98.5381	-93.3238	-98.0812	-116.621	-70.9897	-83.0174	-85.9956	-83.8153	-99.3603	-71.4758	-92.4096	-93.6592	-77.7749	-97.8272	-73.8359	-124.362	-72.2632	-65.7335
Mycoplasma agalactiae PG2	-79.8404	-105.32	-92.3087	-91.3104	-107.741	-106.559	-135.262	-87.4804	-125.404	-129.215	-95.196	-113.52	-93.1633	-126.942	-77.8503	-109.697	-101.899	-105.586	-94.6688	-88.2578	-84.6699	-124.768	-97.2052	-86.2221	-87.5515	-103.008	-109.077	-110.69	-91.221	-120.904	-74.7136	-84.808	-86.4603	-93.9269	-95.9552	-72.1638	-108.2	-107.26	-96.6379	-86.6571	-64.0981	-108.843	-90.7194	-87.8236	-86.6523	-84.5854	-108.861	-82.3557	-61.0441
Rhizobium etli CFN 42	-67.9335	-105.157	-78.6753	-66.4886	-93.1013	-93.9492	-99.7444	-73.0469	-99.4493	-108.107	-96.2975	-93.629	-50.9322	-110.015	-52.848	-71.197	-88.2249	-68.8306	-67.4622	-39.2886	-54.3384	-101.415	-79.3865	-81.0812	-72.3524	-93.2501	-86.4136	-90.9419	-63.3169	-76.2748	-67.0509	-85.7708	-77.8529	-36.5821	-78.7469	-55.7004	-99.4521	-97.1258	-83.4535	-63.6791	-63.4169	-103.718	-77.9409	-62.4864	-71.9674	-70.4604	-85.4573	-66.6746	-61.9145
Rhodobacter sphaeroides ATCC 17029	-44.9245	-99.7362	-85.1953	-61.1805	-88.3222	-89.7195	-97.5978	-69.041	-100.093	-94.7869	-87.0114	-84.4636	-49.2582	-98.3206	-41.7632	-59.7614	-93.5817	-70.845	-54.6691	-63.4739	-68.4258	-116.296	-60.0466	-68.6721	-60.2037	-57.7149	-96.8567	-98.5651	-40.4448	-108.417	-75.4996	-63.2625	-62.0214	-71.2005	-61.4629	-58.448	-84.8328	-77.726	-79.2461	-60.1727	-59.3566	-80.6688	-81.7299	-51.5076	-50.1075	-67.4844	-96.9066	-46.4747	-53.9264
Psychrobacter sp. PRwf-1	-47.7258	-117.521	-104.015	-78.2188	-105.408	-105.476	-121.107	-80.8298	-124.07	-112.536	-104.872	-108.77	-54.7829	-128.047	-67.7684	-62.3217	-102.457	-72.9494	-72.1885	-47.9995	-53.3364	-131.753	-51.9685	-85.5215	-74.4235	-36.2151	-111.833	-113.855	-65.7192	-120.738	-95.4426	-98.1391	-73.7752	-74.7719	-69.7689	-82.9332	-101.572	-93.2374	-85.7817	-79.4811	-74.6992	-108.749	-87.893	-57.3761	-74.5371	-69.6216	-103.067	-48.8597	-83.968
Halorhodospira halophila SL1	-27.3354	-68.6919	-70.9598	-52.4569	-72.6012	-56.5896	-69.0964	-36.6068	-71.906	-59.9867	-54.7502	-50.2338	-38.0646	-78.9515	-43.7779	-30.5664	-67.5707	-58.4885	-34.5774	-43.1104	-36.4458	-75.3601	-35.3923	-68.4973	-43.6633	-11.1226	-52.0169	-80.5747	-36.4691	-53.2227	-59.2712	-64.1033	-49.8817	-44.9774	-44.18	-57.6401	-58.7331	-60.3439	-41.9298	-54.6794	-44.4757	-64.6642	-65.9545	-23.5661	-38.589	-36.3871	-51.5352	-28.4838	-46.6305
Desulfotomaculum reducens MI-1	-42.8568	-14.2682	-12.7702	-31.0834	-40.6598	10.6439	-1.46322	8.40839	10.7621	29.7955	7.08176	15.2125	-39.356	6.08684	-29.4031	-57.6736	-28.554	-43.5606	-43.0425	-51.6444	-25.4807	-12.7037	-45.2648	20.6541	-28.617	-53.7153	3.8798	-1.95825	-55.21	2.31275	-35.5964	-12.5685	-12.5821	-33.7289	-24.7089	-22.3147	30.9119	31.5941	16.8251	-17.7144	-17.5778	19.4698	20.7546	-39.3165	-2.2359	-11.0815	-17.6041	-39.6903	-21.8087
Acidiphilium cryptum JF-5	-69.7521	-109.477	-102.435	-61.6274	-107.943	-106.138	-143.093	-88.3752	-138.626	-110.781	-109.619	-107.019	-39.482	-129.548	-60.4343	-77.3609	-99.9084	-23.6173	-34.4569	-35.8756	-38.439	-123.072	-28.0955	-101.933	-70.3207	-79.1941	-95.4442	-101.824	-74.6007	-134.649	-55.9744	-81.3573	-61.773	-46.6674	-40.8976	-79.341	-120.963	-123.089	-101.9	-66.325	-63.2264	-102.277	-103.314	-72.8383	-54.8516	-62.215	-103.441	-75.828	-50.4555
Hahella chejuensis KCTC 2396	-63.0951	-71.4445	-80.1196	-61.0118	-75.5678	-76.9466	-66.0759	-61.2317	-68.8337	-83.0185	-73.2815	-48.7916	-66.0999	-87.4764	-59.3028	-98.4529	-68.9023	-107.31	-90.6549	-70.654	-64.9936	-71.2519	-90.9884	-66.5425	-59.1293	-69.6434	-71.6983	-93.1538	-79.1723	-75.1483	-56.0777	-61.1558	-65.2498	-71.1749	-91.9173	-53.2049	-56.4453	-55.1003	-52.9875	-67.6425	-35.3011	-57.5761	-55.4749	-69.2407	-63.8587	-53.7959	-68.2931	-66.2099	-41.0693
Akkermansia muciniphila ATCC BAA-835	-83.0531	-109.182	-100.787	-88.8022	-101.759	-80.8265	-109.231	-77.2909	-100.002	-117.392	-92.6676	-92.6074	-67.1566	-98.0788	-85.4021	-119.476	-106.01	-89.4224	-97.3603	-64.4884	-68.7872	-95.9597	-88.772	-47.3616	-87.0213	-98.0696	-81.4017	-85.3111	-97.466	-99.5486	-79.1445	-81.7293	-85.7959	-67.8941	-88.6063	-79.9805	-108.773	-96.1531	-65.6365	-91.6279	-72.9608	-85.02	-68.6747	-54.6277	-82.1637	-69.4611	-76.4501	-84.039	-72.5344
Yersinia pestis Angola	-75.5339	-92.7912	-96.2947	-82.5965	-105.359	-116.869	-131.222	-83.5773	-140.007	-139.014	-104.594	-117.385	-72.1666	-142.198	-84.1634	-108.543	-102.566	-93.9226	-90.2032	-69.5251	-72.5779	-131.972	-93.4715	-88.0723	-81.5676	-108.698	-106.893	-132.573	-89.6567	-126.143	-68.3053	-87.3462	-78.7704	-76.451	-94.1126	-57.6134	-103.238	-90.1588	-92.4401	-82.5326	-58.3771	-88.2566	-93.0432	-72.8959	-77.0009	-59.9352	-116.375	-77.0105	-66.1834
Mycobacterium gilvum PYR-GCK	-81.6165	-95.7791	-94.2248	-109.762	-104.643	-88.7434	-127.874	-82.3699	-132.142	-96.1317	-96.7365	-106.26	-68.7442	-136.666	-63.6629	-88.3339	-97.6318	-74.309	-69.1865	-83.0805	-74.4976	-137.636	-65.8693	-58.2311	-101.482	-67.6263	-110.029	-108.751	-78.0416	-120.492	-63.7112	-90.3402	-82.7989	-84.2821	-75.9876	-69.2249	-106.815	-104.507	-107.468	-94.7178	-67.6932	-109.215	-68.0179	-49.6289	-92.2133	-71.6688	-117.103	-80.1513	-63.6377
Mycobacterium vanbaalenii PYR-1	-61.0982	-91.2096	-92.7308	-84.5925	-90.157	-83.995	-124.891	-73.073	-121.574	-77.2206	-92.3191	-99.6801	-53.0939	-114.141	-56.9709	-79.54	-86.2857	-61.085	-55.6672	-73.4524	-67.4873	-118.482	-59.6008	-55.1138	-88.462	-62.4653	-97.4661	-89.0628	-56.5191	-107.342	-52.1413	-76.8253	-68.9311	-65.7089	-60.9308	-59.7571	-100.476	-99.1487	-97.4901	-82.7925	-58.4828	-92.7374	-65.9759	-37.5955	-78.034	-57.4906	-111.546	-61.8475	-55.9635
Alkaliphilus oremlandii OhILAs	-86.6167	-60.6521	-53.7563	-108.894	-83.8714	-73.5526	-96.6767	-79.9392	-97.7547	-95.7638	-82.1271	-90.5866	-101.951	-113.821	-67.9117	-112.934	-57.9366	-117.323	-105.551	-73.205	-75.3816	-96.3194	-107.07	-79.8308	-99.2141	-119.794	-109.259	-107.637	-110.426	-94.3563	-57.0687	-52.27	-92.7753	-114.194	-109.362	-41.0745	-78.5129	-74.3087	-66.3021	-98.6243	-54.2002	-84.537	-66.7056	-100.365	-83.4282	-79.9036	-99.0847	-84.0824	-37.2608
Marinobacter aquaeolei VT8	-70.3354	-97.0501	-91.4592	-74.4273	-95.6626	-107.898	-117.952	-88.6796	-107.031	-98.2964	-84.5806	-77.9499	-82.2652	-133.308	-65.0612	-81.8585	-90.003	-117.084	-93.2329	-84.2911	-83.0892	-109.129	-92.7698	-74.498	-78.5284	-46.0326	-94.1954	-112.373	-59.4382	-116.187	-103.21	-87.5461	-79.7865	-93.7012	-91.8449	-80.6312	-78.6382	-78.4949	-76.3543	-70.5088	-71.7475	-86.2273	-79.6751	-67.8007	-75.6631	-65.2448	-112.055	-73.9954	-76.977
Geobacter uraniireducens Rf4	-36.282	-17.7823	-31.1699	-22.7028	-40.4107	17.4468	46.1517	12.9672	50.3117	-9.71784	23.1077	27.229	-45.9941	43.0094	-27.3814	-84.381	-29.8002	-52.5418	-43.2923	-26.9197	-29.6242	71.8523	-38.922	18.0456	-30.8502	-51.5035	38.0591	39.0424	-68.7259	47.8272	-23.1904	-19.2664	-17.7836	-46.1312	-28.7912	-20.3028	26.9241	28.087	25.0349	-15.8401	-30.538	32.4686	7.80304	-4.10604	-16.5388	1.33289	54.7369	-42.0073	-17.5719
Acidothermus cellulolyticus 11B	-30.6749	-73.5185	-52.8434	-6.093	-58.1241	-74.1066	-88.3203	-51.2338	-80.946	-55.9165	-86.7797	-80.274	11.5565	-80.1019	-3.42462	-21.6507	-55.2593	37.0673	31.2605	8.40054	4.09488	-88.7519	25.8226	-49.5336	-5.30853	-26.9663	-55.7405	-49.1226	-27.2094	-86.202	-13.0065	-26.796	-16.9801	13.8686	25.9833	-37.7409	-99.1887	-92.5067	-86.9623	-1.86729	-21.7815	-81.1791	-54.9346	11.1419	-21.302	-23.3554	-60.0307	-32.6712	-38.2538
Caldicellulosiruptor saccharolyticus DSM 8903	-69.4863	1.96709	4.94472	-26.1698	-6.16141	-7.27319	-32.0177	7.48042	-13.0382	-20.9767	-0.485642	-30.6244	-48.5832	-27.7923	-41.1654	-68.4602	-6.43929	-37.1646	-37.4214	-33.7459	-37.0058	-11.452	-33.6813	-5.48431	-23.4332	-89.7858	-21.5359	-11.48	-70.3337	-0.0441086	3.50362	-9.43998	-3.96789	2.53132	-48.203	-2.35955	-18.4905	-17.5346	-11.9237	-25.0237	-13.0308	-12.7598	-9.89379	-59.8156	-14.0015	-0.349369	-9.48895	-72.8291	-6.82538
Shewanella sp. W3-18-1	-89.6405	-122.834	-120.335	-111.667	-133.403	-105.908	-150.329	-88.5983	-126.101	-139.093	-101.613	-114.434	-83.2595	-146.293	-95.2345	-126.73	-124.612	-131.052	-115.313	-104.612	-94.6599	-131.032	-104.586	-94.0994	-97.6407	-121.832	-119.936	-126.662	-112.781	-127.201	-109.358	-102.387	-92.8264	-103.529	-101.217	-91.6507	-84.2652	-91.1846	-91.4765	-112.606	-66.4208	-94.2753	-92.0743	-92.9678	-92.0505	-78.96	-104.444	-90.1203	-81.2166
Pseudomonas putida F1	-59.304	-77.3779	-84.7706	-68.0269	-82.1764	-90.5135	-108.954	-67.6965	-100.778	-83.1353	-76.1754	-81.8246	-38.6443	-106.26	-63.5443	-66.7078	-82.0295	-50.0471	-63.0842	-44.021	-35.7668	-90.7867	-60.5315	-67.3772	-76.6119	-49.0365	-82.6164	-94.5122	-43.8148	-85.6526	-69.4219	-74.8963	-64.7283	-62.0237	-54.338	-66.761	-83.1341	-84.8476	-67.4261	-76.7711	-58.9732	-74.7023	-73.0737	-55.7734	-60.4376	-50.8683	-81.702	-58.6457	-63.3653
Leptospira borgpetersenii serovar Hardjo-bovis JB197	-98.0159	-127.065	-117.951	-94.6419	-134.306	-126.875	-163.435	-89.7792	-145.261	-133.781	-102.007	-121.33	-73.8972	-144.405	-83.4256	-135.53	-127.33	-112.766	-90.7084	-72.9172	-69.0663	-134.305	-93.3006	-88.9016	-103.98	-117.7	-123.7	-129.002	-112.091	-136.206	-111.264	-118.499	-98.2711	-88.9551	-100.519	-106.033	-111.739	-111.473	-125.644	-98.347	-95.2816	-92.4479	-108.897	-43.0738	-85.8192	-76.7893	-114.032	-104.517	-85.144
Orientia tsutsugamushi Boryong	-126.058	-163.717	-140.06	-132.298	-163.787	-133.529	-189.657	-105.851	-181.787	-169.516	-134.082	-150.542	-109.491	-188.858	-111.616	-162.633	-153.939	-145.271	-125.547	-112.407	-106.392	-166.512	-125.987	-128.001	-130.043	-140.786	-146.585	-167.756	-135.575	-161.155	-117.444	-122.31	-129.961	-124.871	-132.734	-102.913	-147.976	-143.433	-135.059	-122.851	-100.061	-129.399	-137.91	-122.091	-122.876	-102.56	-150.182	-127.486	-106.582
Burkholderia pseudomallei 1106a	-69.8501	-101.351	-82.0966	-62.7636	-89.5661	-87.7394	-127.498	-70.7337	-118.887	-106.914	-85.7031	-94.6071	-53.9431	-110.566	-65.4701	-104.519	-77.9719	-64.982	-64.363	-58.6398	-48.6666	-107.327	-65.8547	-69.1502	-60.9833	-88.2777	-84.5989	-94.148	-93.6161	-102.248	-46.6925	-74.099	-60.5683	-65.3805	-67.1682	-66.2037	-92.8233	-83.4746	-78.5572	-55.5806	-53.4283	-79.9358	-93.0902	-58.0817	-63.9814	-59.3377	-84.7636	-70.1196	-53.9248
Psychromonas ingrahamii 37	-69.256	-88.2499	-75.2291	-80.2875	-87.7133	-102.931	-114.572	-78.2567	-119.162	-134.396	-91.5057	-78.7499	-67.0628	-114.075	-63.1119	-80.5405	-81.6731	-97.0567	-79.9752	-85.495	-90.0725	-100.752	-90.5939	-60.7799	-71.9728	-73.5775	-108.213	-104.383	-52.0333	-112.345	-82.7294	-77.1462	-85.4966	-74.306	-91.4289	-41.1604	-76.8006	-83.9346	-82.6966	-74.9801	-60.017	-80.1624	-83.1404	-70.4979	-87.6023	-73.0799	-110.094	-67.3199	-60.2925
Roseiflexus sp. RS-1	10.2869	10.9571	20.5954	21.061	1.29888	0.322251	-14.1578	-16.6368	-20.573	-4.20448	-19.4204	-8.17114	1.93461	-22.919	35.275	22.3308	7.81836	2.05289	2.02968	0.170319	4.64148	-3.89328	10.2329	-10.7342	22.8284	0.129233	-21.223	-0.718853	30.2263	-9.86814	20.0737	20.4848	20.4768	10.3424	2.74815	14.5193	-35.81	-37.6152	-34.004	24.8162	8.0741	-33.0431	-14.0873	12.5988	18.9385	-6.39173	-17.3585	14.4419	3.38732
Clostridium phytofermentans ISDg	-124.706	-66.2352	-60.8264	-101.044	-81.7763	-82.4648	-99.3775	-64.8054	-91.6221	-117.149	-67.891	-76.5941	-105.843	-81.7508	-81.6187	-157.877	-68.906	-117.321	-103.306	-97.4458	-113.649	-92.7868	-109.404	-47.0738	-102.936	-160.881	-104.305	-95.3432	-125.211	-90.0469	-55.3994	-60.8495	-91.7432	-76.6542	-109.382	-44.2673	-68.2321	-59.2001	-35.0984	-95.9008	-53.8005	-68.5587	-47.9003	-111.307	-83.2007	-70.0268	-81.8801	-129.07	-36.9818
Bartonella bacilliformis KC583	-55.2096	-92.3868	-86.1122	-66.3493	-90.7632	-85.2054	-100.763	-64.5037	-92.8887	-102.116	-77.6003	-70.3491	-52.7897	-92.7067	-56.0779	-77.5309	-94.6642	-81.8893	-64.5361	-50.6341	-52.8283	-97.8805	-65.7569	-69.9381	-69.0606	-68.3774	-71.9699	-89.1026	-61.3488	-90.969	-74.7023	-74.9934	-66.0718	-67.5084	-69.8545	-64.6152	-84.8474	-83.1879	-61.6737	-68.552	-61.7474	-79.4986	-79.1476	-39.5243	-68.5829	-57.35	-82.4501	-53.7414	-57.0618
Campylobacter concisus 13826	-108.299	-120.328	-106.47	-107.714	-117.646	-102.453	-139.255	-74.7549	-131.219	-123.254	-91.4487	-116.879	-90.2375	-132.602	-93.695	-130.277	-110.989	-123.705	-110.698	-102.064	-102.281	-104.234	-121.917	-79.794	-99.9781	-129.062	-105.581	-127.711	-129.737	-124.034	-97.7258	-105.371	-86.5261	-108.314	-113.659	-100.361	-93.9677	-81.8825	-97.8497	-106.004	-75.8664	-75.3836	-81.3548	-88.0866	-87.2571	-79.466	-105.732	-112.206	-92.2507
Campylobacter curvus 525.92	-91.1426	-92.648	-90.8108	-85.4936	-98.8594	-86.9553	-102.401	-64.3078	-104.8	-93.2354	-63.2541	-82.0962	-68.1377	-97.909	-75.4112	-97.5597	-90.6612	-101.971	-95.3357	-81.5246	-69.7009	-81.1105	-94.4955	-60.5468	-90.7798	-96.0967	-89.9406	-100.76	-81.24	-100.374	-83.8908	-94.7217	-65.5724	-81.3052	-81.1825	-93.7996	-64.8067	-71.9251	-71.1876	-79.969	-67.1431	-58.0285	-64.8218	-66.0851	-71.4289	-63.2814	-69.4501	-92.0245	-79.8091
Campylobacter fetus subsp. fetus 82-40	-57.3452	-62.4844	-71.3118	-58.2706	-71.1985	-61.6035	-77.793	-43.3187	-70.9573	-69.472	-33.4146	-59.2767	-48.7161	-70.8524	-51.3656	-72.7011	-62.1986	-67.0636	-71.8714	-47.4471	-52.3998	-59.0325	-68.8679	-37.9773	-58.6777	-54.0759	-63.1597	-69.0522	-58.1222	-73.2675	-72.53	-65.4703	-39.245	-56.0697	-58.2165	-67.459	-40.0275	-46.9875	-49.1301	-50.5738	-54.2245	-34.5507	-45	-26.8594	-38.5852	-21.7334	-65.3613	-59.1328	-66.9435
Campylobacter hominis ATCC BAA-381	-81.8401	-99.8826	-101.502	-83.2842	-96.5104	-80.1421	-114.944	-44.5491	-105.383	-97.8918	-57.9293	-84.9455	-69.8955	-109.075	-65.0772	-101.293	-101.896	-96.8675	-81.8902	-80.9971	-77.9072	-101.525	-80.8737	-55.607	-71.7133	-89.0811	-77.6572	-112.845	-84.4208	-96.07	-87.4794	-77.738	-63.3681	-74.251	-78.1543	-81.5551	-63.9439	-66.0317	-77.5589	-69.7242	-62.2441	-59.9777	-60.418	-58.0418	-59.7814	-46.2391	-81.5436	-81.6136	-79.1113
Mycobacterium ulcerans Agy99	-100.628	-130.01	-113.458	-116.645	-132.602	-108.966	-171.293	-90.1749	-181.703	-131.306	-109.131	-143.775	-63.8762	-162.941	-79.2357	-116.011	-129.877	-58.7125	-65.3997	-80.0513	-73.9725	-170.679	-68.8096	-89.8453	-115.684	-96.6042	-126.136	-147.148	-106.267	-154.786	-89.8518	-112.53	-109.387	-81.7158	-77.1576	-89.6928	-139.003	-136.888	-138.479	-108.655	-75.6441	-107.787	-103.928	-64.9812	-106.431	-85.6435	-145.353	-103.2	-76.144
Lactobacillus salivarius UCC118	-91.9096	-137.65	-114.289	-121.838	-142.019	-130.683	-166.702	-96.4494	-150.444	-154.776	-129.497	-129.754	-86.3117	-154.962	-101.353	-135.699	-122.139	-104.108	-103.908	-84.8546	-89.0902	-144.289	-101.16	-92.8859	-108.092	-115.09	-132.888	-131.704	-108.526	-137.855	-85.1496	-96.1903	-119.507	-97.3348	-99.9257	-85.6415	-131.507	-123.319	-115.161	-117.037	-88.2319	-130.513	-100.59	-96.1024	-117.172	-103.04	-126.378	-94.8308	-80.4689
Lawsonia intracellularis PHE/MN1-00	-36.1182	-71.5272	-46.7596	-65.6101	-57.0763	-32.8868	-54.7581	-16.6869	-44.3626	-52.693	-30.3956	-36.3076	-55.6308	-37.5843	-54.9398	-64.9065	-53.2428	-77.41	-74.7164	-51.8654	-46.1698	-29.1164	-63.8514	-18.3454	-51.2921	-61.0736	-40.5296	-34.6867	-53.5847	-33.8284	-46.3825	-47.0494	-58.331	-64.5047	-66.1333	-59.0299	-28.4237	-38.6618	-22.3907	-58.5972	-40.1822	-16.1581	-30.1712	-45.4471	-50.658	-42.9915	-15.4458	-35.6951	-49.3586
Polaromonas naphthalenivorans CJ2	-69.3349	-115.717	-113.074	-69.8555	-116.452	-83.0492	-125.363	-71.9071	-92.8209	-95.6454	-84.5106	-97.0751	-68.0109	-118.253	-66.0178	-73.0281	-114.153	-90.1058	-76.3867	-62.4975	-68.5811	-118.553	-64.5703	-82.3684	-73.2939	-63.6297	-83.9362	-100.71	-66.8415	-104.448	-81.8301	-83.2013	-70.3107	-88.3055	-72.0938	-81.0766	-99.2815	-94.0264	-82.1462	-68.382	-65.988	-94.0825	-87.9422	-62.4773	-65.3532	-66.9208	-83.8665	-72.4692	-71.8942
Sinorhizobium medicae WSM419	-58.3854	-74.9359	-76.503	-50.0353	-80.9336	-84.6294	-73.9222	-66.4397	-72.3048	-104.79	-77.6227	-70.3815	-48.353	-66.8947	-39.6894	-70.3396	-79.1322	-73.6612	-53.5429	-48.7518	-52.5737	-102.399	-67.6065	-78.5696	-55.9839	-79.4571	-86.1934	-82.7352	-52.3336	-88.2668	-47.4062	-55.5822	-62.015	-41.4778	-80.5025	-47.5472	-78.7983	-80.464	-72.9908	-62.3694	-56.3994	-82.005	-68.4618	-48.111	-55.9572	-63.9112	-81.7776	-57.25	-27.6448
Caulobacter sp. K31	-87.8365	-126.205	-118.626	-118.635	-127.04	-120.24	-144.263	-100.092	-134.761	-138.898	-110.506	-112.676	-70.0424	-141.268	-87.3686	-144.747	-122.973	-110.696	-82.0615	-81.3886	-82.9458	-128.882	-82.6463	-98.8802	-111.298	-100.316	-118.45	-141.421	-112.879	-132.741	-92.7612	-110.747	-102.947	-81.9331	-103.057	-103.62	-121.54	-121.24	-110.045	-110.501	-101.983	-109.006	-114.632	-79.4507	-96.4837	-87.3402	-119.118	-90.29	-79.1126
Arcobacter butzleri RM4018	-84.0666	-100.227	-107.169	-90.715	-118.971	-85.5224	-105.021	-69.8984	-91.8866	-105.724	-68.226	-85.6513	-65.1042	-98.4368	-77.7052	-110.01	-109.556	-78.7924	-72.896	-55.3536	-60.6845	-93.805	-79.4817	-72.3468	-95.9186	-96.8125	-95.4775	-84.3962	-85.2541	-91.5546	-104.428	-93.1903	-75.0164	-76.5014	-76.3255	-97.6107	-66.1876	-64.1939	-82.6016	-83.2369	-69.9759	-59.8589	-75.2009	-41.1822	-73.0896	-49.8197	-79.0793	-88.1216	-83.9062
Bifidobacterium adolescentis ATCC 15703	-90.5734	-108.314	-90.3703	-83.9069	-96.7848	-102.835	-131.219	-75.4759	-121.144	-124.437	-94.5194	-111.101	-64.8353	-120.471	-72.9615	-83.454	-101.876	-70.1488	-60.5456	-78.5931	-80.4228	-109.38	-69.5151	-58.4462	-72.3764	-91.9575	-109.297	-102.278	-64.8123	-127.47	-64.7645	-84.7751	-74.1635	-53.1761	-72.6662	-70.0933	-95.4964	-89.8041	-70.0625	-77.5918	-70.6574	-91.428	-59.8685	-75.9708	-80.7062	-62.6812	-87.6535	-91.3216	-57.7747
Salinispora tropica CNB-440	-37.1015	-84.1832	-75.543	-74.1912	-93.845	-84.8027	-128.53	-69.7038	-122.897	-97.4845	-92.4786	-125.326	-53.4151	-109.247	-59.9918	-65.3876	-90.3362	-59.4519	-74.3907	-37.1624	-47.6705	-128.087	-53.2067	-72.8206	-72.4338	-59.3661	-88.3657	-100.029	-57.2331	-111.057	-68.1236	-65.6549	-75.7187	-42.9442	-66.6461	-67.6136	-108.89	-94.6919	-94.1187	-64.4489	-45.0826	-91.0991	-68.1858	-21.6606	-76.2322	-64.4722	-114.593	-38.9604	-58.7299
Pelotomaculum thermopropionicum SI	-65.1396	-41.2937	-31.9948	-17.182	-31.5537	27.9764	-7.86184	24.4969	10.5376	20.443	4.23906	-20.8429	-52.6231	10.3274	-23.7673	-71.7335	-24.5457	-20.9405	-23.6267	-34.4387	-27.5612	27.9668	-32.2844	8.17461	-14.5373	-64.2765	28.0467	6.91925	-62.4535	37.1825	-27.3208	-4.57195	3.41535	-21.5126	-18.4343	-39.8751	-1.79167	11.5261	6.19293	-9.86778	-17.2339	-1.22698	11.0741	-22.5819	-2.0382	5.44305	1.26179	-63.6734	-16.9191
Streptococcus pneumoniae D39	-69.4862	-100.117	-88.6156	-81.1303	-91.2937	-115.484	-148.187	-83.1723	-135.723	-130.613	-95.8648	-114.21	-70.8194	-141.744	-65.3536	-94.4131	-85.2484	-89.4535	-92.9346	-76.386	-77.5482	-126.118	-81.0772	-74.1501	-80.4244	-91.1843	-107.426	-119.837	-71.4766	-111.532	-51.9734	-81.5332	-72.2904	-82.0122	-93.7442	-65.9671	-105.109	-98.2925	-80.6628	-78.6664	-73.2607	-107.588	-65.3327	-74.7938	-75.1861	-85.2369	-111.738	-68.3603	-61.0146
Baumannia cicadellinicola str. Hc (Homalodisca coagulata)	-8.82643	-33.1704	-39.3625	-16.0508	-35.7007	-35.862	-46.9863	-18.4225	-45.0021	-44.7505	-34.2137	-35.1056	-8.12344	-41.1783	-30.9016	-26.8321	-37.1493	-27.9904	-19.173	-17.2391	-15.8527	-27.751	-20.9112	-17.4221	-23.7654	-24.4483	-26.5834	-34.8274	-19.8974	-33.8526	-36.8686	-30.2428	-17.3626	-9.72593	-17.8905	-30.8688	-39.9472	-36.7845	-22.2978	-20.3545	-16.1277	-34.7983	-19.5701	6.54605	-12.3055	-14.9107	-18.7312	-7.8157	-23.3602
Neisseria meningitidis 053442	-81.5557	-120.219	-114.735	-87.3627	-117.601	-105.229	-142.553	-74.8633	-129.239	-140.398	-91.9963	-95.4599	-61.8249	-139.79	-77.7632	-108.549	-110.667	-95.7035	-84.4556	-79.2974	-79.5374	-136.041	-78.715	-80.3974	-84.6136	-76.8403	-107.455	-120.442	-78.2163	-121.549	-101.501	-104.637	-75.9945	-81.8339	-84.4866	-87.9565	-108.128	-99.9148	-86.7273	-86.5384	-81.5684	-98.0321	-93.1375	-56.6001	-72.6434	-69.4253	-118.03	-82.4803	-93.7685
Haemophilus influenzae PittEE	-53.2088	-80.863	-93.2344	-72.7296	-92.2986	-97.4419	-110.31	-71.3517	-117.341	-109.022	-78.0953	-84.3777	-67.7302	-112.587	-69.0609	-71.7539	-93.5451	-88.9023	-74.379	-80.6297	-71.4413	-96.5934	-76.347	-69.0833	-68.2079	-70.4095	-87.8958	-102.624	-52.3747	-97.7997	-63.9471	-79.6816	-69.02	-80.0648	-74.4686	-62.3296	-82.8523	-73.2062	-60.6302	-75.4677	-65.8684	-78.9769	-74.4188	-46.8608	-63.5908	-62.6726	-96.1427	-53.9514	-56.0377
Janthinobacterium sp. Marseille	-78.4269	-133.564	-114.344	-65.813	-128.062	-118.042	-131.959	-89.4545	-132.947	-126.383	-100.638	-107.481	-75.4514	-144.963	-67.484	-88.1665	-119.087	-82.9597	-74.0352	-78.4924	-69.9135	-100.022	-63.8647	-82.3269	-73.5863	-66.0181	-101.578	-103.936	-61.9623	-112.452	-86.2856	-91.313	-63.3517	-74.0737	-80.3391	-83.0307	-108.431	-108.486	-100.758	-74.5666	-72.1901	-96.3049	-88.9039	-56.0368	-66.1705	-66.4547	-90.6698	-79.6199	-79.9768
Roseobacter denitrificans OCh 114	-56.8485	-108.706	-95.1668	-65.1302	-107.292	-98.6928	-127.523	-70.0264	-120.027	-101.731	-90.9984	-81.4297	-46.1915	-138.253	-35.7122	-31.6265	-101.55	-62.7515	-50.5903	-70.4116	-69.3668	-137.254	-47.9643	-95.6533	-61.1517	-47.6189	-95.8264	-121.502	-33.356	-119.377	-71.4616	-73.2336	-74.9818	-67.1449	-65.3879	-58.4215	-93.8143	-94.7084	-93.2208	-59.1206	-58.3255	-98.6559	-86.7084	-52.4564	-62.0725	-75.4672	-108.858	-59.3963	-61.9028
Flavobacterium johnsoniae UW101	-106.767	-141.201	-130.566	-121.772	-135.954	-133.477	-166.694	-104.137	-140.971	-171.656	-124.705	-127.59	-69.3372	-147.418	-116.028	-146.791	-129.698	-131.079	-110.01	-91.7857	-80.7761	-136.209	-121.269	-97.6629	-115.252	-141.473	-131.427	-118.814	-127.558	-148.093	-114.573	-111.694	-116.011	-94.3738	-107.594	-87.5623	-120.535	-125.271	-110.524	-119.359	-85.5609	-119.265	-105.274	-81.4282	-114.959	-85.1973	-118.692	-108.96	-87.3192
Pseudomonas stutzeri A1501	-60.8231	-90.6966	-82.1573	-67.1135	-91.2818	-82.6839	-99.4975	-65.0216	-91.0053	-77.7119	-79.994	-76.4184	-68.1693	-114.231	-47.6952	-66.5815	-91.539	-72.7203	-69.564	-67.3908	-64.3472	-92.2401	-54.9368	-70.647	-54.1344	-47.5868	-75.8163	-92.4811	-45.3263	-87.3633	-77.4489	-72.2239	-74.9686	-84.1263	-83.3629	-57.4127	-73.8081	-75.7025	-66.2124	-67.1032	-58.3151	-75.6516	-77.7012	-71.4394	-69.0608	-70.4614	-84.8421	-59.3702	-62.895
Aeromonas hydrophila subsp. hydrophila ATCC 7966	-38.6706	-69.6368	-70.1002	-65.0126	-73.2209	-79.6302	-90.3465	-71.9924	-94.8728	-99.5991	-62.9678	-97.3505	-70.0355	-104.096	-58.5929	-78.3112	-65.4746	-88.5328	-85.406	-68.2659	-65.2289	-73.1565	-80.7717	-63.6093	-52.0302	-77.3941	-75.7553	-90.3545	-68.1482	-95.2828	-44.3726	-58.1659	-47.8891	-70.0146	-78.2125	-41.3596	-61.7709	-75.6669	-57.1616	-60.9986	-37.2527	-65.6258	-73.6579	-58.3366	-51.9906	-60.4268	-85.745	-34.2129	-27.8477
Hydrogenobaculum sp. Y04AAS1	-29.3465	-10.0735	-15.1819	27.2887	-15.5382	-9.60355	-16.9018	6.71059	-19.8447	-10.202	1.71669	-27.815	13.3484	-14.1578	1.18813	-42.1711	-13.6548	35.0584	38.6483	15.5669	24.7402	-29.0832	37.6791	6.77988	18.8178	-26.7	-6.06412	-13.0034	-33.5732	-17.1925	-18.6288	2.40639	15.0264	16.0085	45.5329	-19.9666	-2.22355	-2.539	-34.8248	19.595	-1.52639	18.8127	-9.628	6.21364	17.479	34.4861	-5.4025	-31.0937	-6.65243
Ralstonia eutropha H16	-48.9282	-52.0673	-61.7142	-47.2728	-70.1563	-83.6173	-98.0493	-50.0291	-73.9626	-53.2181	-80.1124	-72.4453	-44.911	-96.5913	-45.3973	-61.9175	-55.4585	-30.3768	-25.115	-36.4168	-33.8818	-72.7959	-33.3815	-58.2953	-47.3478	-41.1074	-68.3228	-61.3089	-48.7201	-79.6836	-57.4063	-36.7626	-44.6947	-48.2511	-17.5597	-54.7893	-78.2861	-77.9432	-65.7441	-43.8275	-29.8275	-72.4306	-74.2207	-39.4636	-47.3864	-39.573	-60.6711	-49.9794	-54.7127
Pseudomonas aeruginosa PA7	-50.0549	-68.1487	-74.7301	-61.4578	-80.1623	-83.8153	-76.5147	-66.5487	-79.8089	-79.249	-67.7131	-63.5844	-56.0197	-94.4058	-54.1966	-75.758	-70.381	-70.7243	-63.3956	-50.4344	-50.1915	-90.665	-68.4973	-70.7045	-62.4298	-52.3344	-78.4062	-95.2229	-55.1599	-90.5358	-67.7801	-58.8042	-63.3321	-58.9985	-69.2621	-61.78	-76.8913	-64.5552	-74.1351	-67.8322	-54.6683	-72.0841	-72.6043	-44.5549	-59.2272	-53.035	-79.1364	-48.954	-52.8452
Fervidobacterium nodosum Rt17-B1	-18.6874	56.1306	61.0497	-13.1039	41.3358	-46.8578	-63.3953	-31.9114	-63.2955	-18.8653	-36.6666	-42.3652	-18.3998	-71.3822	9.46094	-45.9214	47.6962	-35.1109	-36.7095	-8.7753	-12.7672	-58.2956	-26.722	-48.1372	-7.49047	-48.8923	-59.4605	-40.0467	-53.6554	-49.2317	27.5319	5.95412	-9.96518	-12.7447	-44.1322	45.7468	-43.8611	-40.6965	-47.4909	-12.2772	22.904	-43.8917	-41.3584	-47.5335	-13.2349	-29.0735	-61.9761	-22.4886	37.3318
Aeromonas salmonicida subsp. salmonicida A449	-56.0342	-82.4308	-77.8032	-84.8467	-92.0741	-109.132	-124.544	-85.3441	-124.167	-126.991	-83.1653	-113.493	-82.5586	-123.492	-81.5755	-113.579	-84.5094	-114.78	-104.163	-92.3993	-84.0158	-99.047	-93.8772	-80.3565	-75.037	-111.732	-98.6006	-116.373	-89.7905	-110.045	-58.0755	-75.9074	-71.6748	-88.4204	-100.554	-66.9052	-80.4567	-94.2771	-66.5016	-86.0374	-53.2476	-78.7964	-92.6562	-74.279	-74.3197	-62.0402	-101.338	-55.8199	-49.1046
Helicobacter acinonychis str. Sheeba	-97.0947	-128.741	-121.139	-105.631	-133.174	-122.325	-157.15	-87.2574	-156.19	-130.904	-98.9759	-126.233	-94.6377	-148.429	-83.9856	-133.612	-133.434	-107.798	-96.2814	-86.5491	-85.3592	-138.444	-91.2494	-84.969	-107.11	-107.28	-119.779	-135.485	-107.255	-140.66	-99.8786	-100.59	-92.9243	-97.9718	-92.3685	-97.2656	-105.715	-102.072	-98.5102	-99.3736	-75.8024	-91.8552	-103.297	-81.7679	-91.4974	-68.5881	-118.016	-102.837	-84.9759
Bartonella tribocorum CIP 105476	-124.049	-170.826	-152.141	-125.6	-172.332	-164.61	-199.045	-128.905	-190.169	-179.605	-157.838	-162.428	-111.979	-196.049	-109.874	-171.133	-163.88	-143.704	-127.959	-98.7457	-98.0249	-185.477	-128.309	-132.401	-135.83	-137.395	-148.046	-177.812	-129.168	-178.413	-123.005	-128.062	-128.848	-129.83	-135.126	-116.085	-176.193	-166.726	-142.305	-122.556	-101.92	-158.072	-154.496	-101.579	-124.326	-111.209	-161.513	-124.01	-102.739
Roseiflexus castenholzii DSM 13941	3.32659	2.44527	22.0515	20.6955	-5.17805	3.65025	-26.2569	-23.9232	-21.1718	-6.27425	-26.7959	-17.5163	4.54746	-21.466	32.032	27.7237	5.44798	19.2298	5.35363	10.5912	3.85697	-18.8316	9.75312	-21.8128	13.5627	2.26958	-26.7092	-8.46362	30.99	-19.8665	21.1164	22.9579	21.5274	15.3161	14.8186	13.9069	-45.9408	-36.7839	-35.7758	17.576	11.7089	-33.4374	-18.0351	5.30184	17.734	-11.536	-26.887	3.62194	-2.38627
Pseudomonas entomophila L48	-55.5781	-97.8072	-83.1846	-77.9282	-91.5826	-90.0113	-128.368	-70.4247	-119.414	-93.928	-79.9475	-88.2291	-46.0247	-122.879	-71.3119	-73.3155	-85.382	-75.6049	-72.0846	-52.4324	-57.3002	-95.0239	-70.4393	-72.0307	-72.4611	-65.8072	-86.0399	-93.2004	-57.7343	-94.8978	-69.5167	-85.3119	-69.8928	-81.7284	-90.5036	-67.1761	-82.8467	-73.5704	-66.9915	-77.5935	-65.2844	-81.4912	-74.6867	-55.6295	-71.7186	-54.5429	-93.726	-55.846	-71.8554
Listeria welshimeri serovar 6b str. SLCC5334	-29.1199	-82.5457	-76.9849	-77.3327	-78.7316	-90.577	-108.624	-57.6718	-105.067	-108.802	-83.788	-86.9818	-39.123	-103.017	-54.7085	-72.7351	-75.8679	-68.7913	-65.4223	-38.7211	-46.9336	-99.3647	-65.8396	-70.2176	-75.6286	-67.569	-94.1121	-78.1587	-45.5524	-81.6072	-56.322	-68.4491	-77.5727	-61.6222	-72.2277	-66.6645	-78.6572	-63.545	-56.2933	-80.1049	-56.6136	-85.1496	-71.9155	-61.8657	-78.3748	-64.577	-72.2102	-31.5363	-47.9592
Clostridium novyi NT	-48.4536	-45.5965	-43.8618	-55.1389	-63.4077	-60.7377	-57.5416	-42.1956	-69.0009	-61.7494	-41.8714	-39.8633	-74.5895	-72.7488	-57.4604	-93.023	-51.7358	-86.9353	-73.6539	-54.3681	-59.705	-55.3871	-71.3246	-21.2193	-64.3409	-87.982	-63.8715	-63.1758	-65.9997	-52.7834	-62.7147	-49.9268	-46.1113	-49.8114	-79.1555	-38.591	-40.6303	-38.4791	-40.9242	-52.5386	-43.1348	-50.6186	-34.309	-52.4608	-55.0465	-50.0451	-59.1987	-49.5428	-37.7696
Nitratiruptor sp. SB155-2	-43.3962	-21.4189	-25.3912	-13.2545	-31.4396	-24.0421	-47.6394	-6.15992	-25.7594	-31.6079	-9.6923	-29.9877	-9.16782	-51.3922	-23.81	-46.2824	-24.0771	-28.9692	-27.9361	-16.5015	-15.5975	-32.462	-31.0137	-15.998	-4.585	-42.0192	-28.8202	-26.5458	-50.9415	-36.5198	-32.0076	-35.3579	-9.73775	-18.4475	-19.584	-26.3502	-19.6277	-18.0902	-37.9904	-9.05527	-19.441	-5.19787	-38.781	-14.2337	-9.79612	15.3496	-22.3279	-42.2383	-30.5566
Sulfurovum sp. NBC37-1	-81.5659	-83.2939	-82.2557	-74.1665	-92.2331	-64.112	-86.841	-43.6628	-81.4367	-96.9878	-51.9382	-82.2358	-55.8418	-81.5754	-68.1766	-107.69	-77.0979	-83.6282	-67.5058	-57.652	-56.9839	-77.5629	-80.3703	-54.8248	-75.3763	-92.7694	-67.6376	-65.9463	-97.897	-91.2583	-59.4163	-70.4266	-61.4057	-51.6454	-66.1376	-66.6136	-59.3096	-57.8459	-68.498	-69.3358	-51.5468	-37.9028	-63.4005	-53.211	-63.036	-31.4317	-62.5556	-80.735	-57.5417
Lactobacillus brevis ATCC 367	-118.757	-159.622	-137.096	-149.114	-167.313	-173.033	-195.822	-139.101	-197.99	-180.661	-155.139	-199.397	-113.476	-195.387	-106.624	-163.508	-161.106	-128.683	-120.069	-106.083	-102.406	-185.279	-119.594	-133.104	-144.321	-151.922	-175.858	-152.759	-142.682	-158.301	-93.6914	-130.088	-148.654	-117.995	-126.44	-89.0972	-173.492	-165.62	-125.027	-141.733	-102.332	-170.682	-142.78	-124.696	-145.827	-129.091	-153.931	-118.787	-84.4795
Candidatus Carsonella ruddii PV	-110.77	-131.344	-107.756	-96.3777	-124.379	-116.312	-140.191	-101.639	-136.625	-119.139	-123.622	-132.977	-78.8155	-140.981	-67.2079	-119.059	-114.256	-72.909	-69.5625	-67.7911	-71.6131	-148.514	-71.7161	-110.74	-92.0025	-115.147	-120.787	-127.754	-105.796	-138.185	-70.1551	-93.3829	-90.8104	-76.8787	-76.4193	-81.5238	-131.796	-132.358	-126.289	-88.77	-76.6159	-124.208	-113.681	-82.5637	-95.6096	-90.7649	-120.937	-109.972	-78.2254
Streptococcus sanguinis SK36	-80.9404	-109.906	-96.7108	-84.3991	-103.664	-100.17	-122.125	-80.3637	-123.91	-129.529	-83.7638	-105.5	-64.7982	-129.5	-72.2542	-99.2034	-107.195	-85.6156	-81.6435	-71.9536	-68.2861	-120.726	-80.2457	-65.928	-88.6021	-91.841	-96.1606	-101.352	-80.1984	-112.405	-75.8846	-88.74	-91.6362	-81.1618	-87.0878	-82.0074	-101.885	-99.8598	-78.2715	-82.8961	-77.4077	-94.42	-64.8292	-73.8368	-78.6823	-76.2689	-98.9047	-77.002	-68.2799
Borrelia afzelii PKo	-113.252	-134.73	-117.277	-123.159	-143.894	-134.207	-180.758	-102.538	-160.566	-145.196	-123.646	-139.855	-130.122	-173.871	-96.665	-153.699	-130.672	-149.328	-140.406	-123.71	-122.762	-159.01	-139.767	-112.408	-129.897	-143.431	-129.163	-150.966	-130.968	-154.501	-108.449	-110.054	-123.85	-127.615	-135.625	-90.7312	-124.954	-121.385	-126.698	-128.61	-91.8667	-119.807	-119.751	-114.76	-119.627	-97.9999	-145.053	-114.716	-82.3296
Thermotoga petrophila RKU-1	-2.39733	76.4311	81.1671	40.7674	95.5484	16.5845	11.5214	10.268	-9.08306	26.3915	9.80877	6.14709	6.62733	14.6197	36.0574	-1.62645	76.3001	16.5059	14.1443	19.6484	14.615	-10.9845	18.1102	-5.58048	36.403	-10.1368	1.92177	7.54037	-6.58183	-0.586283	58.3996	63.1299	45.0419	45.3002	14.6353	61.7791	-8.0426	5.2628	-19.1683	36.7375	54.8457	-3.5202	-0.018726	-27.4879	39.8517	24.3739	-12.9586	-3.21385	56.4426
Thermosipho melanesiensis BI429	-15.026	47.1222	66.9122	-10.2708	30.0209	-27.3687	-40.5407	-21.7565	-43.3637	-11.2057	-8.89775	-38.2269	-8.06306	-49.1961	11.8604	-49.9453	54.7385	-26.2866	-21.0075	-3.00457	4.8645	-40.9193	-19.1165	-27.1824	-4.58206	-52.1951	-44.2273	-50.8021	-62.7965	-44.6473	30.9541	2.975	-14.5936	-22.3025	-28.7386	52.7872	-23.4999	-26.8201	-39.4354	-2.93505	21.5948	-28.5138	-27.1708	-41.0868	2.4303	-34.0218	-42.1379	-15.8842	43.6614
Salinispora arenicola CNS-205	-33.1347	-100.648	-82.0053	-71.7273	-91.3819	-82.989	-123.176	-68.8748	-112.66	-93.5039	-85.4832	-114.002	-51.8261	-121.09	-52.8771	-67.6436	-85.0762	-49.8318	-54.1608	-41.3184	-51.4147	-107.461	-51.3341	-77.327	-66.1599	-65.3724	-88.8671	-83.5547	-64.602	-101.357	-67.7265	-69.1322	-65.2125	-47.1564	-57.8848	-57.0087	-110.245	-90.9918	-98.0927	-64.2456	-48.9079	-83.0567	-68.8954	-25.3443	-69.2682	-58.8819	-107.751	-36.261	-56.8347
Granulibacter bethesdensis CGDNIH1	-46.4946	-119.243	-108.215	-59.112	-120.181	-77.0637	-94.7535	-51.6294	-89.3561	-100.924	-84.9007	-73.1723	-26.785	-88.4918	-53.1319	-67.59	-109.049	-38.5597	-16.4441	-39.6027	-31.9347	-91.493	-32.307	-63.7829	-55.3217	-43.6848	-74.5861	-90.8707	-48.8194	-91.1936	-80.3798	-77.3845	-58.3572	-48.5921	-26.075	-86.5826	-87.2598	-92.7985	-80.4483	-58.283	-66.5127	-85.8638	-80.3547	-29.1585	-53.9899	-51.3986	-72.4913	-51.6631	-56.5127
Streptococcus suis 05ZYH33	-115.114	-141.504	-129.416	-130.028	-143.152	-150.008	-178.45	-121.627	-176.857	-175.2	-137.416	-149.752	-110.379	-170.13	-100.961	-144.934	-136.119	-122.21	-120.816	-110.271	-121.586	-164.422	-122.295	-116.267	-117.239	-147.823	-154.732	-155.836	-121.834	-160.665	-94.2984	-110.386	-114.751	-111.989	-129.139	-90.8771	-133.279	-138.505	-118.931	-130.726	-95.0097	-145.885	-118.8	-122.704	-115.002	-105.681	-158.393	-118.127	-78.3277
Streptococcus suis 98HAH33	-105.031	-137.437	-125.362	-118.962	-137.083	-146.943	-164.343	-116.58	-172.758	-164.123	-128.361	-142.668	-102.313	-162.026	-95.9089	-133.822	-130.056	-120.132	-115.745	-104.214	-114.528	-158.331	-121.223	-111.208	-108.173	-141.725	-141.664	-147.743	-108.745	-150.582	-86.2544	-101.332	-110.69	-105.925	-127.067	-87.8384	-128.209	-132.438	-120.864	-124.663	-87.9678	-138.828	-108.737	-113.641	-106.944	-98.6365	-151.313	-110.043	-74.2911
Verminephrobacter eiseniae EF01-2	-106.633	-143.818	-110.177	-81.0465	-129.557	-130.139	-193.64	-89.9551	-173.061	-127.856	-122.551	-125.183	-76.2863	-184.496	-69.2275	-123.601	-113.266	-88.5146	-77.7234	-78.7646	-93.829	-158.69	-66.9226	-102.43	-83.4933	-109.013	-130.039	-165.94	-98.1984	-167.583	-78.9843	-89.3041	-76.4568	-89.5276	-86.4052	-82.1777	-129.335	-133.078	-119.225	-81.5852	-82.1073	-137.121	-126.012	-99.6752	-85.4795	-87.9786	-142.039	-107.779	-73.9827
Desulfovibrio vulgaris subsp. vulgaris DP4	-57.6357	-56.0076	-59.0428	-54.28	-68.3378	1.58673	-15.428	-10.2205	-13.1126	9.43336	-8.54738	-5.61807	-61.5674	-0.57217	-48.154	-103.75	-62.2471	-87.7777	-63.3866	-60.5869	-61.582	2.31975	-77.3203	-19.3015	-41.7163	-91.6286	-4.76621	-8.25978	-72.95	-16.0311	-38.534	-25.7359	-29.7415	-60.7296	-57.1497	-46.1893	18.2853	0.799126	-11.2328	-47.9156	-27.9995	0.90063	-14.8158	-46.5757	-35.801	-12.4774	16.5966	-56.3119	-34.9584
Sphingomonas wittichii RW1	-108.598	-142.802	-125.208	-112.849	-139.619	-112.886	-169.136	-88.8991	-156.794	-135.037	-108.345	-117.263	-87.8661	-168.289	-94.4738	-154.273	-140.512	-95.9011	-94.5986	-77.2249	-65.8759	-151.35	-82.1159	-96.6349	-113.474	-115.711	-127.044	-154.49	-136.378	-132.211	-117.104	-102.332	-114.352	-85.9978	-91.7228	-96.1997	-130.344	-121.05	-105.745	-109.654	-84.4893	-115.858	-104.36	-81.6304	-98.9732	-83.1102	-126.428	-114.996	-79.7472
Yersinia enterocolitica subsp. enterocolitica 8081	-53.8263	-71.9079	-77.4055	-67.7906	-84.4783	-83.9743	-109.514	-65.6348	-105.264	-117.231	-77.6458	-90.5187	-63.4217	-105.459	-60.3586	-79.0563	-72.6913	-71.2779	-66.5034	-49.7624	-51.8031	-104.136	-75.785	-64.1466	-65.768	-74.0663	-86.0121	-99.818	-58.9973	-101.301	-46.4512	-81.459	-67.924	-59.6649	-62.3992	-57.7157	-71.3122	-65.2295	-67.54	-69.7333	-54.4971	-60.3079	-73.1283	-48.0932	-65.137	-53.0032	-87.5638	-51.3118	-61.2746
Alcanivorax borkumensis SK2	-46.0203	-107.872	-103.42	-77.5237	-105.047	-98.944	-115.342	-67.2625	-118.898	-95.8652	-93.3529	-79.1469	-59.2354	-115.812	-62.0163	-55.1104	-104.208	-75.6871	-59.4426	-57.9427	-62.1655	-122.421	-53.8284	-85.6972	-77.8126	-30.2428	-98.4255	-121.058	-40.3365	-110.73	-93.7717	-98.8692	-73.8745	-70.8126	-65.2447	-86.2179	-92.0564	-89.974	-79.6486	-73.3105	-61.1121	-81.6983	-79.3392	-47.0775	-72.7227	-64.151	-98.2974	-50.4218	-77.5463
Maricaulis maris MCS10	-67.3065	-123.291	-113.423	-97.3327	-130.611	-109.748	-140.947	-90.8137	-144.776	-129.48	-114.135	-123.744	-65.4765	-152.198	-68.309	-88.6913	-120.529	-86.3799	-80.163	-62.618	-64.6354	-151.669	-79.0521	-102.78	-100.755	-72.0043	-115.034	-127.995	-85.4595	-130.084	-99.8761	-105.098	-96.945	-76.7583	-83.9366	-87.6765	-127.131	-120.646	-111.564	-103.973	-76.415	-115.675	-113.231	-59.6421	-104.068	-72.0361	-131.378	-64.9591	-75.4893
Burkholderia multivorans ATCC 17616	-61.8096	-85.0707	-82.6468	-58.303	-84.0784	-97.7472	-105.298	-60.5086	-102.624	-108.081	-81.6799	-85.5102	-46.7751	-102.219	-54.0105	-89.2376	-77.2898	-54.3339	-45.0826	-40.1838	-41.9648	-112.568	-49.1703	-68.655	-56.2664	-80.0129	-92.3282	-100.044	-72.857	-99.4373	-61.6429	-64.7228	-55.2159	-49.8076	-53.9834	-65.6947	-93.8573	-81.5218	-89.0823	-43.6626	-57.5698	-85.055	-87.552	-61.3922	-60.1283	-59.9896	-86.005	-61.696	-62.7717
Leptothrix cholodnii SP-6	-90.4161	-96.8323	-89.2185	-60.7904	-92.4618	-83.5978	-116.978	-60.0568	-103.802	-91.8154	-77.9135	-79.8268	-73.1135	-116.106	-57.4726	-47.6248	-89.8547	-65.7121	-56.4348	-78.0324	-65.7303	-99.2171	-49.071	-76.9855	-55.9411	-65.6738	-66.9917	-89.0663	-72.8837	-84.2401	-49.258	-61.3157	-59.8519	-71.2298	-68.9256	-75.349	-67.1055	-64.9413	-82.0066	-60.9317	-53.5923	-85.5519	-75.2324	-63.1958	-64.5988	-49.6959	-85.3457	-91.1459	-55.6128
Methylocella silvestris BL2	-76.2236	-122.197	-108.856	-81.3778	-128.721	-84.5248	-100.856	-57.2843	-80.3963	-100.275	-89.4111	-94.3895	-62.7026	-89.482	-69.9783	-118.61	-116.806	-78.3836	-61.809	-78.4734	-69.7665	-102.325	-84.7991	-76.3997	-82.2213	-88.7668	-80.2454	-99.2213	-92.3384	-93.649	-101.167	-86.8589	-78.4121	-90.8423	-54.9815	-91.3874	-99.543	-91.5438	-71.1938	-75.1898	-81.772	-98.0797	-87.1295	-57.6222	-75.0142	-76.4176	-75.2328	-81.5181	-77.1942
Acidovorax avenae subsp. citrulli AAC00-1	-78.4658	-122.38	-99.7308	-87.3682	-117.074	-124.866	-157.73	-92.2732	-157.677	-126.897	-97.97	-126.636	-65.4626	-151.067	-69.315	-110.669	-107.66	-99.8807	-98.0692	-71.0752	-70.3949	-123.732	-80.0538	-90.5542	-93.6992	-93.6656	-108.581	-137.693	-82.2247	-110.662	-84.8391	-80.8521	-97.4009	-101.431	-98.0847	-76.7617	-122.561	-114.335	-89.0867	-82.7441	-68.4368	-121.57	-108.021	-77.9041	-87.6973	-77.1575	-108.603	-81.4491	-77.7407
Delftia acidovorans SPH-1	-77.7162	-105.406	-98.9389	-77.9824	-105.366	-111.166	-151.441	-87.1713	-152.043	-113.645	-91.4005	-115.871	-59.7015	-160.616	-69.4331	-115.83	-99.514	-92.0429	-76.4386	-70.0688	-66.0475	-121.731	-73.4072	-84.2363	-75.873	-83.2728	-94.6627	-130.516	-87.2782	-114.593	-80.4812	-80.0296	-78.224	-89.1854	-85.6222	-77.9699	-111.564	-100.235	-89.6267	-80.2179	-61.7302	-101.809	-86.1072	-82.0048	-69.2837	-71.604	-85.8799	-77.4962	-65.1471
Shewanella pealeana ATCC 700345	-90.6027	-93.7712	-96.1897	-96.946	-107.378	-92.6483	-137.235	-71.5446	-120.404	-107.759	-82.4609	-93.6357	-78.6169	-146.67	-86.566	-120.541	-101.7	-112.166	-103.463	-95.6821	-76.5143	-112.741	-89.9649	-85.3235	-84.0299	-95.1038	-100.911	-98.7732	-113.579	-115.811	-72.842	-79.2727	-79.4092	-87.1635	-96.1155	-68.3778	-83.4694	-85.3336	-75.1203	-99.0073	-47.4493	-80.1102	-81.4754	-83.3087	-84.3312	-65.0837	-101.597	-93.2386	-59.7522
Dinoroseobacter shibae DFL 12	-53.2961	-115.269	-92.7064	-67.0858	-114.866	-87.1983	-132.952	-62.3009	-118.28	-113.799	-103.244	-84.0686	-65.4641	-114.527	-38.6851	-49.2018	-107.157	-65.5395	-64.0956	-86.6013	-84.4929	-132.041	-71.5366	-87.0084	-73.1398	-36.4493	-94.4001	-122.699	-27.0483	-120.135	-82.1865	-72.782	-77.7339	-72.2054	-62.8187	-63.9248	-103.163	-98.0408	-97.6976	-81.1126	-61.9168	-95.8974	-91.1148	-55.4306	-72.7363	-61.7934	-124.776	-51.8898	-50.3502
Geobacter lovleyi SZ	-74.0354	-47.3926	-50.1865	-68.5474	-56.8881	10.1143	-13.5544	-18.3666	-10.5885	-33.0835	-3.55603	-1.27938	-69.1176	-4.59682	-62.2278	-125.508	-47.9072	-81.5081	-72.6491	-60.1874	-48.621	30.2201	-67.4622	-9.21332	-69.3137	-88.5294	-15.4023	-13.5942	-90.5122	-3.22192	-57.0919	-52.1515	-59.1375	-76.7884	-55.9654	-57.89	12.6873	2.62721	6.39418	-62.2957	-38.0263	1.77796	-10.7742	-23.7696	-58.9784	-38.3532	17.5975	-80.2183	-49.8504
Thermoanaerobacter sp. X514	-23.0433	31.4589	29.5782	-2.14771	41.6097	4.40899	-9.77611	-6.50667	-7.99274	2.89227	3.63061	7.7053	10.3515	-5.85441	-4.08563	-37.598	31.4229	11.6068	1.12138	14.8495	3.51162	-14.0422	-5.60202	19.1383	-13.3504	-43.0409	7.16652	-14.9744	-26.8068	-4.23467	14.9427	1.4849	-11.9186	0.240946	8.57999	33.2534	7.40696	2.64903	12.1625	1.52144	5.60151	-7.18119	21.91	-24.3874	-5.76971	-10.324	-6.60134	-25.154	14.145
Pseudomonas mendocina ymp	-47.2634	-80.6004	-77.9554	-75.9446	-84.273	-84.1738	-116.64	-75.9026	-109.862	-86.3203	-76.6508	-75.7845	-56.4638	-112.226	-43.7914	-79.5449	-85.7964	-73.97	-61.6535	-52.1621	-53.6068	-99.6617	-70.5273	-71.0769	-63.2172	-44.8492	-87.7895	-90.9532	-53.6093	-91.6167	-68.7146	-73.071	-64.302	-75.802	-78.8289	-59.0107	-81.1266	-72.9183	-69.458	-61.2418	-54.5509	-90.2647	-71.4778	-53.4361	-74.741	-60.7113	-89.2916	-47.1645	-61.0799
Serratia proteamaculans 568	-49.5504	-49.7898	-55.1484	-71.9936	-64.5281	-88.114	-96.5634	-66.9418	-94.9944	-114.798	-70.54	-73.1532	-61.2101	-92.429	-58.1694	-67.4425	-54.235	-62.4013	-66.6301	-53.6906	-47.7603	-89.6525	-55.825	-64.413	-63.4381	-78.9069	-73.0104	-88.8761	-67.0996	-97.5457	-28.9416	-69.2757	-55.4164	-58.4661	-62.3189	-36.1497	-71.3201	-55.0635	-61.2035	-72.529	-49.0743	-67.1102	-73.9924	-50.6204	-60.4445	-44.9626	-86.9911	-47.6934	-43.9582
Enterobacter sp. 638	-64.5788	-62.7621	-72.1809	-57.9303	-66.3685	-86.6402	-111.212	-77.5402	-97.3836	-123.742	-81.4569	-93.6254	-51.5959	-105.649	-64.5499	-83.4979	-66.6905	-95.1364	-77.4376	-44.6623	-53.4956	-100.728	-72.9387	-72.3178	-47.0137	-72.0736	-95.9021	-97.7537	-56.5508	-103.799	-37.83	-75.2637	-58.3969	-57.146	-77.0917	-53.3695	-72.4639	-65.3283	-77.1127	-66.991	-50.4396	-69.1063	-86.4688	-57.2927	-67.3204	-46.0785	-74.5825	-68.214	-47.7449
Acinetobacter baumannii ATCC 17978	-130.568	-153.097	-146.393	-133.672	-153.515	-149.04	-196.469	-124.584	-189.825	-164.154	-137.892	-168.988	-98.4462	-183.589	-126.787	-143.622	-153.422	-115.61	-107.552	-84.4194	-87.1713	-173.292	-115.912	-124.623	-137.256	-116.291	-149.99	-168.362	-146.414	-173.126	-128.428	-113.236	-128.719	-107.433	-106.155	-130.7	-138.482	-140.73	-123.847	-141.316	-111.173	-138.523	-124.69	-101.889	-128.182	-106.188	-131.322	-132.479	-123.067
Marinomonas sp. MWYL1	-53.0771	-105.446	-90.8186	-93.8746	-100.09	-104.146	-112.585	-79.3516	-130.203	-118.022	-86.1719	-73.5109	-72.597	-125.529	-81.6048	-58.6579	-89.5266	-90.8345	-77.2086	-76.4356	-74.05	-112.069	-77.9252	-80.3662	-83.066	-76.7864	-109.617	-126.407	-60.841	-106.066	-73.0972	-88.923	-80.6965	-73.4519	-78.5967	-63.9199	-74.4658	-78.2858	-74.5146	-78.0667	-65.2649	-81.8028	-81.6673	-71.3077	-75.3387	-85.0493	-104.365	-58.8642	-61.1176
Flavobacterium psychrophilum JIP02/86	-72.6981	-134.954	-133.172	-112.735	-138.868	-123.839	-158.544	-99.7802	-142.319	-157.313	-124.946	-126.561	-58.3535	-151.379	-86.0054	-109.073	-137.82	-89.8359	-80.8907	-64.361	-66.6959	-130.72	-90.7136	-103.715	-107.942	-107.553	-124.282	-129.961	-104.864	-146.555	-102.458	-108.32	-107.13	-87.2489	-85.4981	-90.7989	-132.992	-131.591	-115.187	-109.949	-81.6503	-110.868	-112.192	-60.8339	-94.8251	-87.5583	-119.865	-73.8498	-83.7792
Ralstonia pickettii 12J	-70.7153	-80.8458	-80.2052	-58.0992	-84.586	-94.1634	-143.717	-68.9684	-119.127	-88.9141	-88.5625	-102.213	-52.3625	-133.563	-67.2855	-74.7597	-77.2978	-51.6276	-61.8165	-53.8385	-55.8976	-110.728	-53.02	-82.447	-60.5484	-67.1189	-83.0671	-88.0034	-58.297	-106.62	-65.027	-65.3325	-57.4971	-60.589	-53.4913	-67.2056	-102.35	-100.092	-82.2473	-59.6414	-47.1402	-84.1313	-95.0308	-62.7299	-63.5143	-57.9945	-89.0864	-74.8649	-65.0072
Parvibaculum lavamentivorans DS-1	-47.4078	-112.673	-110.526	-79.4408	-114.158	-110.23	-128.866	-77.9963	-121.091	-105.833	-96.2075	-102.433	-42.7326	-132.067	-57.1641	-89.7782	-107.155	-60.6387	-58.0489	-53.9233	-59.4079	-128.764	-49.795	-88.7349	-80.1787	-53.4995	-104.667	-116.169	-68.643	-118.255	-85.2868	-92.4754	-83.2436	-71.6023	-68.4151	-74.3035	-119.811	-114.895	-93.9673	-86.1681	-73.3441	-101.871	-103.228	-52.6574	-82.1756	-68.9267	-117.285	-49.5491	-61.3228
Petrotoga mobilis SJ95	-24.9128	60.3487	58.5286	-4.83195	63.2062	-26.0741	-37.0773	-27.0811	-35.7446	-13.0662	-29.5265	-29.406	6.43354	-34.6797	9.65238	-18.3787	65.1039	-2.01284	-9.60363	-0.303662	-7.45186	-34.2152	-0.730533	-38.8089	7.86629	-34.3693	-30.9777	-34.005	-24.8026	-28.7719	26.9012	33.6032	2.93277	13.2185	-4.37765	33.828	-35.4779	-29.7238	-30.2022	-5.42607	7.58102	-40.2007	-30.9034	-41.5644	-3.99975	-10.2352	-39.105	-26.7796	31.7448
Geobacter bemidjiensis Bem	-44.9437	-18.5547	-28.0704	-26.2042	-26.1187	22.3439	25.3671	14.5393	28.5109	-8.57392	9.51168	-3.11413	-38.6521	24.3294	-22.7696	-55.5078	-15.313	-40.2068	-40.5982	-16.047	-16.1238	47.3595	-38.8398	13.0786	-34.1628	-50.9537	3.34814	36.9215	-62.9697	28.1754	-15.0109	3.8822	-26.4598	-34.0194	-28.5348	-29.4067	24.9126	18.9849	16.7627	-24.1272	-20.1347	29.8479	9.12949	1.50266	-18.7256	-8.79753	36.0059	-44.4025	-17.9991
Anaeromyxobacter sp. Fw109-5	-45.6511	-27.6567	-33.0248	-19.2484	-34.3054	-35.3337	-41.1378	-24.4523	-33.6849	-31.4373	-27.2597	-33.7441	-35.1113	-49.0177	-14.9973	-74.7117	-27.7572	-53.5732	-31.8251	-23.9234	-8.50809	-31.3596	-45.5697	-28.4961	-20.4542	-62.5173	-27.8304	-15.8685	-47.5186	-13.3491	-38.3878	-28.1314	-22.9871	-39.8747	-30.1764	-27.1169	-31.5878	-34.4025	-39.6875	-30.4587	-9.497	-30.8879	-39.8156	-17.6915	-27.593	-15.17	-25.7143	-44.4584	-12.2915
Lactobacillus helveticus DPC 4571	-86.1804	-118.764	-98.374	-112.841	-117.174	-117.388	-136.87	-85.5001	-135.979	-143.954	-115.016	-111.075	-92.8965	-131.165	-88.3811	-118.474	-107.538	-102.963	-94.499	-81.9026	-92.7003	-127.244	-97.4663	-78.0513	-105.326	-110.244	-117.837	-119.375	-94.2917	-126.538	-74.329	-88.8545	-103.156	-93.2258	-104.565	-74.7516	-118.608	-111.997	-89.5467	-108.619	-84.2719	-118.878	-92.321	-91.0229	-99.7477	-90.9089	-108.002	-87.9188	-55.4798
Saccharopolyspora erythraea NRRL 2338	-27.9916	-64.3988	-60.1477	-54.8539	-59.6186	-65.7808	-91.6222	-48.7605	-107.992	-73.0115	-75.7258	-89.649	-28.0905	-84.6736	-33.5826	-33.8334	-70.0278	-30.2262	-31.5563	-43.7957	-40.8058	-107.382	-28.056	-54.1825	-57.079	-40.4647	-89.6459	-73.2506	-49.7935	-89.3048	-47.7766	-52.1482	-54.6365	-10.4948	-18.337	-45.2557	-75.8429	-79.4941	-79.5863	-52.6807	-42.4866	-82.9551	-49.1225	-33.1765	-61.0395	-40.3663	-78.8393	-26.2691	-39.9694
Gramella forsetii KT0803	-88.6278	-133.874	-119.797	-108.226	-122.347	-130.501	-162.01	-87.5824	-157.441	-161.459	-105.816	-113.489	-68.2229	-154.382	-104.004	-124.813	-123.322	-109.61	-93.3091	-73.5489	-71.0868	-160.635	-92.9828	-104.2	-101.934	-119.283	-130.851	-137.599	-97.6029	-154.183	-110.407	-107.728	-102.26	-95.3054	-102.726	-94.6592	-127.247	-131.359	-124.255	-102.933	-89.5956	-113.476	-110.619	-70.4388	-101.29	-90.4519	-133.052	-86.725	-89.7424
Bacillus thuringiensis str. Al Hakam	7.91693	-38.9436	-32.2951	-48.41	-33.6546	-54.3656	-61.2548	-36.5407	-61.9978	-53.0495	-51.1989	-81.2458	-24.9399	-43.406	-32.4405	-29.7269	-23.2878	-49.0469	-47.862	-14.4959	-20.7195	-73.5023	-35.9292	-38.8981	-43.7851	-23.738	-68.1529	-49.9599	-24.1511	-51.4163	-28.6688	-27.4195	-45.2023	-41.6309	-37.7531	-30.3119	-36.8685	-39.6296	-16.5364	-48.8468	-29.0859	-50.7879	-19.4105	-35.9805	-49.3932	-19.4796	-54.5552	8.87162	-23.2239
Candidatus Vesicomyosocius okutanii HA	9.32394	-15.4245	-38.1318	-8.9838	-12.9527	-2.45223	-1.60929	16.5152	3.60678	-9.78467	16.3497	26.8769	6.64212	-1.83652	-16.8529	1.58298	-24.8046	-10.4889	-6.28706	-13.1888	-1.72706	-7.30557	-0.634802	6.52486	-6.62041	8.85293	3.60755	-7.97094	10.4335	6.73372	-53.2418	-19.2847	0.694386	-8.76872	-0.632471	-43.7275	6.32818	11.9684	10.0291	-2.88118	-15.2032	13.2861	12.5403	15.9723	-0.679905	10.1552	-5.97908	8.29103	-35.9921
Candidatus Ruthia magnifica str. Cm (Calyptogena magnifica)	19.1917	-17.362	-30.6365	-9.83983	-11.9494	-3.80321	-2.02918	13.6755	3.63234	-11.6636	22.9406	29.184	5.87252	1.95867	-22.9449	8.33278	-19.7029	-11.8982	-6.45153	-13.746	-10.3422	-7.33259	-6.61411	4.92662	-7.51831	14.2274	-0.601467	-7.19245	26.0261	12.651	-54.5058	-23.8572	-0.221111	-8.69448	-5.71021	-38.5749	14.4883	26.0834	12.9176	-4.74728	-14.9739	16.1995	12.2579	23.2775	-1.3067	16.2506	0.214945	19.0788	-32.7356
Actinobacillus pleuropneumoniae L20	-56.8171	-73.5678	-89.2246	-63.7633	-96.9357	-86.6042	-97.5804	-62.3899	-103.33	-109.687	-80.4255	-92.6527	-57.2383	-100.843	-58.2946	-71.5779	-91.0636	-79.0229	-77.8301	-66.7912	-69.0261	-112.182	-71.08	-66.8125	-59.017	-65.9829	-105.807	-85.598	-57.4269	-88.7556	-55.0993	-73.1262	-62.4367	-74.2633	-62.8454	-55.5963	-72.4183	-65.234	-58.0794	-55.9648	-51.1837	-81.4385	-74.5119	-43.0311	-68.1045	-51.9846	-93.2845	-56.7377	-54.426
Rickettsia massiliae MTU5	-73.3362	-94.9772	-93.2008	-80.3384	-107.571	-74.3597	-122.794	-67.7284	-110.087	-111.267	-80.5272	-94.4117	-65.6144	-121.785	-68.3618	-104.309	-95.3106	-85.4492	-77.9776	-65.2088	-56.8113	-106.961	-81.1221	-68.5567	-85.0206	-87.3517	-86.1432	-105.835	-80.5297	-90.9812	-76.938	-77.329	-79.7259	-80.1976	-77.2289	-80.9669	-81.0241	-84.4331	-79.6161	-79.2453	-67.3585	-83.2357	-73.2947	-61.2036	-83.7833	-66.1561	-93.3851	-75.457	-70.1172
Thermotoga lettingae TMO	-26.3871	51.1786	76.0077	-7.84563	37.7608	-46.7679	-53.9585	-33.0252	-49.4874	-10.1569	-34.394	-57.4487	-18.2791	-47.1325	28.0757	-40.9605	56.8453	-14.3928	-16.0069	1.44753	-11.8045	-55.1588	-5.29069	-48.8339	-7.08996	-44.9681	-37.0503	-44.5303	-44.1749	-40.5042	57.5062	56.1021	-5.37261	5.75321	-21.0768	63.1541	-52.8708	-37.5857	-35.3221	-10.9582	40.4806	-52.4861	-55.6744	-57.0087	-7.97433	-15.5091	-52.871	-27.3217	61.3862
Lactococcus lactis subsp. cremoris MG1363	-95.2805	-119.09	-112.091	-105.948	-110.026	-120.919	-143.491	-99.5291	-149.114	-150.732	-120.788	-136.981	-75.6143	-140.241	-96.9977	-137.29	-106.904	-102.354	-93.2588	-83.4547	-87.7871	-144.283	-93.1169	-91.6566	-94.1575	-113.431	-117.432	-119.644	-96.5862	-118.999	-80.27	-102.258	-101.211	-83.4322	-106.887	-78.4895	-128.11	-125.656	-96.2989	-96.1242	-89.4101	-116.746	-91.2171	-99.0008	-98.8515	-86.2991	-113.298	-100.447	-70.4255
Methylobacterium extorquens PA1	-73.6294	-116.132	-98.4848	-81.7612	-106.849	-88.5327	-123.768	-67.6302	-112.442	-114.438	-89.2752	-93.4492	-59.4408	-105.856	-54.8221	-91.7658	-108.499	-89.7844	-60.4715	-67.9789	-72.1693	-116.76	-73.5667	-73.0131	-84.1515	-71.439	-76.3443	-118.386	-56.8029	-95.6685	-90.9499	-82.6101	-85.472	-82.0367	-70.3191	-87.4976	-97.9703	-97.7274	-80.6861	-89.2193	-84.305	-88.8603	-75.5407	-64.3439	-77.627	-69.5874	-90.8749	-73.696	-72.3868
Geobacillus thermodenitrificans NG80-2	33.4124	-36.5433	-24.688	-4.76368	-17.9819	-59.3685	-58.6946	-38.357	-72.707	-27.5325	-47.6421	-62.7191	0.0255335	-57.5404	-2.73515	30.4798	-29.9083	6.05255	0.56353	8.30116	3.6243	-67.3381	8.08875	-38.6192	-6.39164	5.97321	-58.4682	-35.0989	0.152177	-44.0595	-14.9182	-26.5654	-19.4367	-3.63373	-6.9779	-11.817	-39.5588	-44.7539	-44.1597	-2.42551	-15.4618	-52.2869	-27.8208	-17.9746	-26.7402	-21.0586	-59.497	33.434	-13.0786
Methylibium petroleiphilum PM1	-75.2906	-118.525	-112.895	-78.0137	-107.17	-92.2161	-134.791	-70.3892	-118.383	-96.1764	-78.2047	-88.5979	-73.7882	-125.711	-69.7507	-90.0497	-101.612	-85.109	-76.4378	-80.6169	-75.2203	-107.177	-63.1648	-68.4146	-69.2105	-60.0583	-80.6963	-88.579	-67.0931	-96.1718	-76.2053	-77.0006	-72.8047	-99.6092	-64.8123	-79.9932	-91.5114	-90.3294	-74.5791	-75.2125	-61.3513	-79.8346	-89.7226	-52.4505	-68.4334	-51.0943	-85.4948	-82.0852	-69.1824
Shewanella sediminis HAW-EB3	-82.3	-90.8931	-78.2571	-81.6706	-95.5476	-86.5443	-107.762	-59.5653	-100.228	-90.9064	-67.3582	-70.0057	-84.694	-123.569	-79.4417	-109.907	-89.0169	-111.412	-95.5241	-80.4766	-80.0273	-96.6864	-89.3006	-58.6419	-85.8927	-89.3442	-100.071	-110.389	-87.2853	-108.667	-72.7167	-69.3662	-73.315	-82.353	-92.8331	-66.3393	-65.7241	-66.533	-70.8815	-84.9018	-39.7592	-63.983	-64.982	-77.1253	-68.8796	-48.3058	-91.1084	-81.1303	-63.4879
Methylobacterium sp. 4-46	-81.4432	-102.233	-98.8926	-54.5988	-94.3372	-68.7623	-126.503	-46.1179	-98.3472	-93.5713	-71.1865	-77.5983	-57.4346	-104.982	-44.796	-74.0339	-106.654	-79.2268	-61.7924	-61.9609	-66.371	-98.9973	-62.0885	-69.4038	-62.6924	-65.785	-69.4882	-89.6818	-51.3605	-74.8887	-75.7017	-76.9358	-73.9395	-71.6581	-73.1575	-66.9722	-84.3564	-76.0125	-57.8517	-71.1867	-65.0362	-62.4944	-81.3325	-53.8064	-60.5947	-68.671	-77.9456	-85.5223	-61.8697
Methylobacterium radiotolerans JCM 2831	-73.3276	-105.554	-89.1639	-61.2612	-104.6	-70.1694	-123.639	-50.7587	-110.765	-107.121	-71.8874	-67.9675	-78.2942	-111.375	-61.1665	-89.4718	-90.856	-96.7668	-70.0308	-75.7446	-74.3751	-84.1677	-83.2054	-62.9636	-72.2784	-66.0041	-65.8113	-94.1481	-46.7341	-83.0452	-89.4959	-77.2274	-67.9352	-78.9926	-73.7151	-74.2249	-76.0669	-74.7275	-66.4067	-84.7142	-79.1807	-69.2359	-66.8761	-69.3997	-58.7403	-64.2717	-65.8171	-77.2932	-65.2279
Clostridium kluyveri DSM 555	-108.023	-53.3658	-57.949	-83.2558	-66.9091	-28.5829	-35.6971	-47.8707	-46.904	-80.3872	-25.9508	-35.7452	-98.1164	-23.038	-79.8282	-157.424	-57.0448	-109.697	-97.6255	-72.6984	-76.8893	-30.9705	-95.7372	-13.1581	-91.1542	-131.279	-61.4387	-43.612	-127.577	-51.2229	-73.5566	-60.9746	-81.9119	-83.8851	-88.6885	-62.3791	-9.31782	-16.2818	-17.2116	-82.1186	-63.9312	-31.6182	-6.99686	-66.5214	-70.3508	-59.1032	-19.0883	-107.396	-60.0817
Bacteroides vulgatus ATCC 8482	-122.196	-124.055	-121.545	-141.036	-118.628	-109.107	-129.882	-93.7071	-130.587	-157.506	-87.7111	-96.6868	-113.744	-123.788	-123.605	-212.706	-119.849	-155.728	-140.883	-101.063	-98.0881	-124.342	-143.182	-64.2402	-147.021	-180.532	-99.162	-134.127	-166.428	-115.499	-115.636	-113.601	-121.118	-106.935	-147.762	-92.845	-92.4053	-97.3183	-89.6657	-147.987	-108.649	-101.372	-68.2354	-104.343	-115.309	-92.0887	-125.801	-124.693	-80.3897
Parabacteroides distasonis ATCC 8503	-141.184	-113.601	-105.233	-136.023	-108.132	-103.891	-121.834	-89.4878	-122.26	-151.001	-88.599	-96.8594	-106.529	-93.3624	-116.612	-181.255	-105.233	-147.515	-131.772	-86.2339	-83.4926	-105.895	-133.803	-62.6629	-124.885	-167.97	-99.6582	-112.044	-166.448	-91.1932	-97.6431	-100.244	-113.928	-85.5427	-141.908	-83.7283	-104.813	-92.8009	-77.5468	-135.852	-96.1703	-95.2675	-65.4304	-100.274	-103.475	-83.6551	-111.872	-143.505	-73.4996
Sulfurihydrogenibium sp. YO3AOP1	-17.5624	5.29412	3.51553	40.5449	11.5748	25.1836	-10.0927	19.5113	7.76	11.3069	33.3719	10.4563	9.10931	1.85242	10.4929	-11.9748	1.59826	22.7383	24.9441	17.4014	32.446	-0.310685	11.9466	10.8157	36.1391	5.67628	13.6246	5.68762	-16.3517	2.47375	4.3435	9.36141	34.5775	34.756	14.5939	-5.5762	18.7215	6.7695	-10.3498	32.2501	14.6534	30.2301	8.77999	29.9665	39.2419	47.1134	7.40302	-21.3509	4.9437
Azorhizobium caulinodans ORS 571	-62.6142	-93.432	-84.7827	-62.4639	-89.1277	-88.9122	-113.871	-76.2979	-113.798	-93.0033	-97.9912	-104.692	-41.5978	-114.19	-37.418	-61.9484	-84.718	-49.0784	-56.233	-47.205	-53.516	-100.803	-58.2251	-71.586	-61.7989	-52.8556	-103.634	-93.8095	-42.4013	-107.732	-71.9151	-76.9044	-66.4746	-72.5414	-55.2374	-75.8123	-95.5895	-95.3619	-77.1284	-63.8453	-72.4964	-81.5904	-84.0566	-68.0029	-52.7614	-75.1873	-85.6907	-59.6031	-54.7851
Desulfatibacillum alkenivorans AK-01	-66.304	-33.3779	-35.7706	-51.0269	-37.1764	19.4865	65.0464	26.3035	39.222	74.8647	37.8246	34.1754	-71.6443	56.7395	-46.5443	-100.708	-26.0295	-91.0471	-65.0842	-50.021	-45.7668	85.2133	-71.5315	-2.37723	-48.6119	-53.0365	25.3836	4.48779	-87.8148	63.3474	-41.4219	-15.8963	-32.7283	-63.0237	-73.338	-32.761	43.8659	38.1524	33.5739	-35.7711	-31.9732	30.2977	5.92632	-51.7734	-18.4376	-25.8683	44.298	-61.6457	-36.3653
Ochrobactrum anthropi ATCC 49188	-37.1008	-91.9498	-75.3012	-49.4214	-95.6609	-104.371	-124.272	-77.5436	-106.012	-112.062	-95.2014	-97.2525	-48.9561	-102.421	-47.4529	-62.7606	-83.2946	-57.0708	-50.8818	-36.5115	-46.7341	-128.511	-52.9499	-82.9019	-56.797	-64.7608	-90.1591	-104.974	-46.1722	-122.424	-55.6779	-66.4257	-66.2111	-54.644	-55.7714	-54.318	-102.872	-94.6328	-87.5413	-58.8589	-58.0931	-88.7903	-88.4148	-51.9923	-68.4008	-66.4831	-108.566	-36.1468	-52.2292
Methylobacterium chloromethanicum CM4	-78.8353	-125.528	-103.962	-87.2674	-112.379	-85.5229	-120.168	-59.2482	-111.537	-121.591	-85.6353	-85.0052	-61.9956	-107.053	-59.0936	-105.755	-110.343	-92.1569	-69.2504	-72.335	-75.8144	-110.307	-84.8901	-72.0772	-84.9628	-76.6116	-78.7758	-118.168	-57.0917	-91.1635	-91.2933	-89.0801	-83.4254	-91.6893	-78.138	-88.9592	-93.6955	-90.3905	-80.2838	-90.1834	-80.3816	-81.1236	-71.8489	-69.1118	-72.8936	-69.5248	-85.6715	-80.3341	-74.4073
Clostridium botulinum A str. ATCC 19397	-83.3626	-53.2987	-50.2734	-83.3606	-51.7628	-45.9758	-58.6837	-44.2823	-51.2619	-73.4786	-34.5301	-59.8077	-89.1529	-37.1767	-53.1812	-132.717	-49.7237	-110.177	-95.0787	-73.5768	-80.1512	-38.821	-94.7017	-26.8128	-78.0476	-135.71	-64.2625	-57.4777	-116.155	-38.4108	-51.782	-40.1917	-69.5561	-85.3837	-91.5296	-29.1992	-27.8357	-28.9679	-22.7403	-76.0543	-44.062	-47.187	-6.17789	-82.5711	-68.656	-53.109	-48.1684	-86.4291	-25.3276
Clavibacter michiganensis subsp. michiganensis NCPPB 382	-78.0689	-144.703	-113.779	-91.8763	-142.029	-145.131	-197.797	-111.048	-189.544	-163.104	-137.372	-164.247	-64.102	-180.987	-65.7936	-100.871	-132.941	-81.1809	-76.8644	-71.1734	-77.1782	-169.25	-68.779	-106.08	-85.3066	-112.936	-144.455	-137.721	-75.3142	-158.628	-82.2535	-109.465	-103.402	-66.3155	-88.6321	-80.9709	-160.467	-159.966	-137.949	-92.5139	-79.7505	-144.92	-124.567	-80.1778	-100.489	-87.2899	-138.967	-76.7349	-75.7587
Brucella ovis ATCC 25840	-45.5519	-111.377	-100.216	-67.0312	-113.623	-108.167	-123.049	-83.9637	-115.818	-107.23	-107.2	-105.714	-47.3324	-109.979	-60.7641	-46.3368	-109.638	-58.3132	-61.1918	-54.3007	-54.4433	-131.743	-59.8004	-87.1369	-59.3734	-49.3498	-97.018	-111.528	-42.6866	-121.615	-64.5311	-75.7707	-72.6036	-58.3483	-72.0021	-74.246	-118.007	-110.729	-89.9396	-66.7312	-66.5223	-100.647	-96.1586	-51.4548	-74.1279	-78.9845	-104.464	-42.0613	-65.3402
Candidatus Sulcia muelleri GWSS	-72.7765	-90.0706	-76.0833	-59.1166	-86.0751	-85.8394	-98.2139	-64.8182	-102.324	-83.0891	-88.7368	-99.4133	-35.0655	-99.6213	-44.2532	-73.5615	-75.3337	-40.0716	-37.1111	-33.6484	-33.8862	-106.11	-36.7687	-71.9716	-52.9527	-74.4035	-82.3525	-79.2339	-69.2008	-97.9188	-51.888	-60.2249	-57.2699	-42.6476	-40.8371	-61.292	-95.9442	-99.5142	-85.6877	-50.0411	-54.491	-88.297	-80.0153	-53.5973	-58.6905	-58.0945	-82.0964	-72.1564	-58.771
Sorangium cellulosum 'So ce 56'	-51.097	-63.2512	-51.2664	-55.5219	-59.0072	-63.1795	-75.7035	-51.1888	-66.6991	-89.2251	-55.8406	-66.8583	-36.0461	-76.6046	-64.9906	-87.0385	-62.5589	-95.8844	-75.2003	-52.7037	-52.3284	-60.5907	-70.2473	-53.0321	-59.128	-77.8777	-60.4353	-45.7828	-69.6129	-62.6549	-51.2381	-47.056	-58.7655	-54.035	-76.9334	-36.332	-77.4574	-74.1138	-56.7809	-57.0973	-36.8481	-56.7313	-66.8504	-43.0956	-61.4638	-55.7878	-54.5007	-50.9913	-27.4512
Microcystis aeruginosa NIES-843	-108.289	-112.223	-118.81	-111.605	-118.242	-74.8802	-133.721	-54.587	-115.985	-130.409	-37.7448	-89.655	-104.253	-122.584	-95.3741	-179.255	-125.468	-136.097	-117.694	-99.6737	-87.4079	-84.7576	-132.81	-53.7518	-107.586	-127.641	-79.4805	-120.393	-93.4487	-112.629	-94.911	-79.8818	-92.4428	-115.181	-121.528	-80.8615	-82.9237	-77.5869	-85.1852	-106.994	-68.7623	-45.1118	-80.6541	-74.71	-85.3214	-53.0783	-86.2616	-116.2	-80.9153
[truncated: 16 more rows]
[truncated: 8 more columns]

## Sheet: Supplemental_Table4
Supplemental Table 4: Horizontally Transferred Genes. Yellow indicates genes greater than 2 standard deviations from the mean for that archaea.
[truncated: 266 more rows]
[truncated: 97 more columns]

## Sheet: Supplemental_Table5
Supplemental Table 5: COGs of reciprocal best BLAST hits between archaea and bacteria
[truncated: 2,397 more rows]
