# Supplementary material for: Effect of the environment on horizontal gene transfer between bacteria and archaea
Source: PeerJ. 2017 Sep 29;5:e3865. doi: 10.7717/peerj.3865 (PMC5624296; doi:10.7717/peerj.3865)
Supplement: Supplemental Information 2 [file peerj-05-3865-s002.xlsx]

## Sheet: carbohydrate
Supplemental Table 6a: Residuals from the upper 95% CI for the COG carbohydrate transport and metabolism.
	Aeropyrum.pernix.K1	Archaeoglobus.fulgidus.DSM.4304	Caldivirga.maquilingensis.IC.167	Candidatus.Korarchaeum.cryptofilum.OPF8	Candidatus.Methanoregula.boonei.6A8	Desulfurococcus.kamchatkensis.1221n	Haloarcula.marismortui.ATCC.43049	Halobacterium.salinarum.R1	Halobacterium.sp..NRC.1	Haloquadratum.walsbyi.DSM.16790	Hyperthermus.butylicus.DSM.5456	Ignicoccus.hospitalis.KIN4.I	Metallosphaera.sedula.DSM.5348	Methanobrevibacter.smithii.ATCC.35061	Methanocaldococcus.jannaschii.DSM.2661	Methanococcoides.burtonii.DSM.6242	Methanococcus.aeolicus.Nankai.3	Methanococcus.maripaludis.C5	Methanococcus.vannielii.SB	Methanocorpusculum.labreanum.Z	Methanoculleus.marisnigri.JR1	Methanopyrus.kandleri.AV19	Methanosaeta.thermophila.PT	Methanosarcina.acetivorans.C2A	Methanosarcina.barkeri.str..Fusaro	Methanosarcina.mazei.Go1	Methanosphaera.stadtmanae.DSM.3091	Methanospirillum.hungatei.JF.1	Methanothermobacter.thermautotrophicus.str..Delta.H	Natronomonas.pharaonis.DSM.2160	Nitrosopumilus.maritimus.SCM1	Picrophilus.torridus.DSM.9790	Pyrobaculum.aerophilum.str..IM2	Pyrobaculum.arsenaticum.DSM.13514	Pyrobaculum.calidifontis.JCM.11548	Pyrobaculum.islandicum.DSM.4184	Pyrococcus.abyssi.GE5	Pyrococcus.furiosus.DSM.3638	Pyrococcus.horikoshii.OT3	Staphylothermus.marinus.F1	Sulfolobus.acidocaldarius.DSM.639	Sulfolobus.solfataricus.P2	Sulfolobus.tokodaii.str..7	Thermococcus.kodakarensis.KOD1	Thermococcus.onnurineus.NA1	Thermofilum.pendens.Hrk.5	Thermoplasma.acidophilum.DSM.1728	Thermoplasma.volcanium.GSS1	Thermoproteus.neutrophilus.V24Sta
Acaryochloris marina MBIC11017	-16.2843	-12.2088	-24.0949	-10.4665	-8.97417	-9.38673	-20.1391	-8.24494	-7.09761	-9.84753	-8.36841	-6.50957	-19.3148	-6.84462	-10.0803	-3.59521	-8.5433	-11.7122	-7.49954	-8.68829	-12.8216	-4.93219	-10.2996	-9.75754	-10.3422	-9.50701	-6.43014	-7.85859	-9.08771	-7.94805	-7.42612	-25.3484	-15.2402	-11.858	-15.3817	-6.50344	-11.5502	-12.1183	-15.5714	-10.1055	-24.8236	-27.5048	-21.4985	-7.33619	-12.5331	-20.6251	-21.0466	-24.2221	-8.1994
Acidiphilium cryptum JF-5	-7.75195	-3.8185	-11.031	-2.37348	-7.89732	-4.81593	-7.9767	-4.98299	-4.25682	-6.63413	-5.37281	-3.78219	1.12407	-2.4903	-5.27285	-0.889832	-4.81799	-7.69971	-9.62384	-4.11586	-2.3573	-1.47318	-1.88232	-6.3104	0.673404	-3.28754	-1.80777	-6.23866	-0.415137	-3.88667	-5.5628	-0.101532	-6.65846	-6.9341	-9.08357	-5.03423	-5.22369	-6.29371	-10.3673	-8.62058	2.35775	0.813518	-0.0312911	-6.60285	-5.19123	-7.15925	-3.6349	0.301292	-3.77173
Acidithiobacillus ferrooxidans ATCC 23270	-11.9885	-6.20837	-22.5796	-7.02448	-4.31345	-10.3627	-23.9668	-11.0708	-11.3867	-18.17	-8.93639	-6.72254	-12.6336	-7.09056	-4.98788	-3.3124	-6.54758	-7.27658	-8.37112	-2.52277	-6.38016	-4.36688	-3.13739	-7.15472	-6.14654	-7.2351	-6.352	-7.44709	-3.78516	-5.9618	-7.05862	-10.5076	-17.5319	-16.858	-18.0074	-13.2572	-12.3092	-12.3052	-13.4592	-15.0061	-13.3144	-15.5239	-12.736	-12.8896	-10.5299	-22.839	-14.214	-12.2208	-9.40944
Acidobacteria bacterium Ellin345	-11.2873	-7.94369	-1.21518	-3.89046	-6.91378	-8.59302	-19.4255	-10.0113	-10.1624	-15.7141	-7.24192	-3.95957	-6.83733	-3.18142	-9.64871	-3.81857	-8.16477	-9.28033	-10.9715	-7.27054	-7.31898	-4.63544	-6.37519	-2.68375	-4.64102	-2.29152	-4.61076	-4.56299	-6.64267	-6.73067	-5.47715	-17.9616	-9.00516	-7.09305	-8.31742	-6.56318	-7.07613	-6.32753	-8.18137	-8.74294	-7.83102	-8.29037	-8.07058	-10.8994	-6.33614	-13.8828	-14.0069	-12.3097	-3.38864
Acidothermus cellulolyticus 11B	-1.21185	-4.73492	0.210452	-4.00351	-0.801456	-3.32015	-8.51496	-3.07976	-2.49018	-3.24709	-2.31781	-2.51521	0.142	-1.39142	-3.93267	-4.69997	-6.53613	-5.80912	-4.36743	-4.28179	-2.84324	-1.55119	-2.41133	-1.11863	2.12314	-1.30345	-1.42943	-5.90324	-0.45412	-3.66529	-4.01941	0.252609	-1.60603	-2.95433	-1.2381	-4.34376	-5.98629	-1.77951	-2.10911	-3.42028	-0.312353	2.3466	2.26646	-4.93196	-7.60245	1.8214	-1.92676	-2.88926	-2.64787
Acidovorax avenae subsp. citrulli AAC00-1	-10.2216	-6.8984	-20.0702	-6.87189	-7.87454	-12.5633	-16.2226	-7.91782	-8.07553	-11.579	-6.2049	-4.94956	-10.694	-5.15512	-6.63587	-7.78527	-10.1532	-8.2616	-5.9585	-5.22226	-7.23531	-4.62877	-8.31145	-12.5812	-9.54469	-10.2099	-6.57963	-8.5134	-5.59163	-4.65296	-5.44106	-8.77266	-4.90224	-9.00096	-8.21967	-7.49864	-11.9963	-16.2389	-12.1039	-13.6976	-9.67587	-17.0868	-10.9251	-16.8477	-14.292	-18.764	-2.8447	-6.13233	-4.36424
Acidovorax sp. JS42	-6.60948	-4.46409	-19.7595	-7.6864	-9.49099	-11.2714	-19.3884	-7.07825	-7.29123	-11.3337	-6.85942	-5.86852	-10.4377	-2.89579	-5.50589	-6.44755	-7.03501	-7.06314	-4.83332	-5.76746	-9.45426	-2.5674	-8.71698	-10.6292	-13.6336	-12.43	-6.27558	-8.02178	-3.10896	-5.92231	-3.09127	-12.1263	-6.95461	-9.14142	-10.3187	-6.89369	-11.2552	-14.4207	-12.3819	-14.2645	-13.3197	-15.3247	-11.6429	-14.3498	-11.8603	-21.6678	-3.41799	-9.58877	-6.13049
Acinetobacter baumannii ATCC 17978	-12.4169	-3.55472	-19.3849	-5.22947	-8.64738	-15.6226	-28.0797	-14.5762	-14.8697	-18.9857	-11.1817	-4.75446	-9.31581	-5.31914	-10.1585	-7.64549	-11.7099	-8.52641	-11.5227	-3.85698	-12.9284	-4.43003	-8.55558	-11.8009	-8.80984	-7.82892	-6.61214	-11.9021	-5.13978	-10.4806	-5.34517	-11.3811	-14.161	-13.4618	-15.6087	-10.6945	-14.822	-15.8583	-18.9694	-19.3558	-15.0429	-14.4329	-13.4487	-10.2953	-13.9087	-26.5773	-9.99424	-6.02941	-3.61828
Acinetobacter sp. ADP1	-12.305	-6.46527	-18.1724	-5.1783	-7.56174	-16.5562	-25.7856	-13.4428	-13.7423	-14.7713	-10.1177	-4.74578	-10.1342	-6.2605	-11.1167	-6.56073	-10.6703	-8.46431	-10.4857	-4.77007	-11.7852	-4.41449	-7.44645	-13.6316	-14.6369	-8.67464	-5.5453	-10.786	-4.04746	-7.34509	-5.27124	-14.1482	-14.9961	-11.3042	-16.4511	-11.5807	-15.688	-17.7136	-17.8363	-19.2658	-12.8488	-14.19	-11.2593	-17.1908	-16.8117	-25.384	-11.7865	-10.8135	-4.56518
Actinobacillus pleuropneumoniae L20	-7.63973	-4.18125	-12.8709	-3.42817	-4.22367	-9.8214	-11.3195	-6.50508	-5.928	-5.30909	-6.97738	-4.41407	-10.1753	-2.0074	-4.26466	-7.09918	-5.86739	-4.1246	-2.65882	-1.80699	-2.12039	-3.25276	-4.84583	-5.32016	-3.02203	-3.49966	-0.992613	-5.07406	-2.97421	-6.01007	-5.5704	-10.8993	-6.82351	-8.15458	-7.48327	-5.72838	-9.29845	-10.06	-11.4097	-8.8194	-8.59389	-9.79868	-8.00038	-7.25666	-5.90186	-14.2409	-11.163	-12.1345	-7.19074
Actinobacillus succinogenes 130Z	-5.91092	-7.44538	-6.30412	-2.7073	-4.4995	-3.06112	-4.88133	-4.77627	-5.19346	-3.75059	-4.13907	-1.46918	-0.496005	-2.19039	-1.59174	-3.38521	-1.19563	-1.45548	-0.00837468	-5.03251	-2.46272	-3.40093	-3.11407	-6.69726	-6.42565	-5.87968	-3.20101	-3.47005	-2.20146	-4.31938	-0.78411	-2.29722	-6.19351	-5.53342	-4.84032	-5.02066	-7.62474	-6.40095	-9.74163	-5.10705	1.06882	-3.19927	-2.34509	-3.57938	-7.23786	-3.68458	-3.52114	-4.48787	-3.41142
Aeromonas hydrophila subsp. hydrophila ATCC 7966	-9.56807	-2.43391	-11.6733	-3.67288	-4.46385	-5.25065	-16.2679	-7.02334	-7.23968	-11.2503	-6.836	-3.86372	-12.3574	-0.877329	-2.49622	-4.42289	-4.02612	-4.04802	-7.82437	-4.73638	-4.40135	-0.563186	-1.67673	-6.56512	-12.5712	-8.37605	-1.2541	-0.986542	-3.07588	-5.87254	-3.06675	-14.0216	-10.8912	-8.08319	-9.25836	-6.85252	-7.20528	-5.36576	-8.333	-10.2344	-9.23326	-13.2134	-8.56055	-2.31508	-4.82975	-14.5942	-13.3265	-10.4908	-8.11412
Aeromonas salmonicida subsp. salmonicida A449	-10.9394	-3.70092	-12.457	-7.78944	-7.70178	-7.432	-13.3645	-10.524	-10.7086	-9.00177	-8.04577	-4.90966	-15.0978	-3.03875	-5.57859	-8.63578	-7.10146	-7.17569	-8.90202	-8.01367	-10.8755	-5.6005	-4.03749	-11.1414	-11.1275	-10.8546	-5.44257	-6.29348	-5.37062	-8.3174	-4.28278	-14.9893	-12.4629	-9.60496	-13.8021	-10.2206	-11.654	-10.86	-11.7711	-11.5003	-7.0315	-15.2457	-11.3182	-7.62178	-7.09752	-16.2563	-18.1688	-15.3974	-11.2581
Agrobacterium tumefaciens str. C58	1.21965	-7.27537	-11.3327	-4.0246	-10.197	-7.80719	0.0136899	-6.736	-6.83191	-1.73425	-2.51936	-4.04517	-3.97427	-5.36917	-6.74176	-4.05063	-6.24748	-4.40742	-5.0709	-3.62939	-7.94519	-2.6879	-8.85293	-9.45398	-8.35235	-6.88861	-4.83516	-7.91681	-6.01999	-4.30759	-3.73844	-7.46746	-3.78495	-4.7826	-7.05743	-7.04516	-1.67769	-2.99825	-3.76319	-0.0780019	-2.06443	-5.92416	-7.21829	-5.27704	-4.65511	-5.7813	-7.28735	-7.724	-5.57015
Akkermansia muciniphila ATCC BAA-835	-12.14	-6.6661	-9.67312	-4.93408	-5.72974	-11.2589	-19.3626	-9.007	-9.41908	-9.12785	-10.2752	-7.50538	-13.7709	-4.34361	-7.85338	-2.62508	-7.4571	-7.726	-7.28445	-6.22234	-6.75228	-2.51663	-7.34036	-8.01769	-7.76877	-7.20204	-4.37515	-6.8004	-3.39373	-8.58241	-5.96339	-14.639	-10.5073	-8.85373	-11.1429	-10.2667	-10.9	-8.68906	-11.0214	-12.346	-14.2206	-15.544	-15.6402	-9.84827	-8.51616	-18.0604	-14.829	-12.7925	-6.5922
Alcanivorax borkumensis SK2	-11.0817	-11.4426	-22.9421	-7.50331	-9.55545	-11.7644	-26.7252	-13.0469	-12.4018	-15.4931	-8.41351	-4.66359	-15.2942	-5.57336	-8.51645	-6.53622	-9.09377	-10.6354	-8.94086	-9.80414	-12.221	-4.19202	-10.2502	-13.8072	-13.7398	-11.9585	-6.76625	-13.3958	-6.02747	-9.86894	-6.42406	-21.8048	-16.223	-13.5803	-15.754	-10.3201	-18.2249	-19.1444	-19.3733	-19.2226	-16.889	-23.7663	-17.3269	-17.9848	-19.6631	-27.2946	-16.6846	-17.6552	-7.91533
Alkalilimnicola ehrlichei MLHE-1	-8.35713	-4.67976	-19.4307	-3.67494	-4.79279	-7.95311	-13.3907	-9.35205	-8.69609	-8.9953	-5.57289	-3.68069	-8.68767	-3.73497	-3.67728	-1.78158	-4.24929	-1.84684	-5.08978	-5.02395	-5.57284	-4.25216	-1.51996	-4.21356	-6.16688	-5.34839	-5.949	-5.72737	-3.2584	-1.19979	-1.62057	-16.3034	-10.6175	-6.96827	-8.13211	-7.60631	-6.55421	-9.4957	-11.704	-15.4669	-13.3071	-17.279	-13.7422	-9.26612	-7.93575	-20.7612	-15.1333	-12.112	-5.07328
Alkaliphilus metalliredigens QYMF	-11.1379	-8.84029	-19.8866	-4.8479	-14.824	-7.52489	-13.9657	-7.79967	-6.96565	-6.40721	-6.15771	-6.93722	-11.5138	-10.1212	-11.6193	-7.74201	-12.1383	-8.23704	-8.94186	-12.1606	-15.1286	-5.62034	-12.2302	-10.4506	-14.4215	-10.1053	-10.5395	-13.4493	-9.52635	-8.55367	-8.39465	-16.5356	-13.7714	-14.8835	-11.0954	-11.4163	-10.8946	-14.1262	-10.0051	-9.63945	-17.481	-19.8317	-15.742	-14.7813	-13.2351	-18.6129	-16.6407	-13.9098	-10.333
Alkaliphilus oremlandii OhILAs	-12.2862	-12.6191	-26.3042	-9.63191	-14.7323	-11.9051	-29.2182	-15.2731	-14.62	-20.8654	-10.5319	-5.67625	-15.5853	-9.69373	-12.6374	-7.71918	-12.2108	-13.7938	-13.0531	-10.9675	-18.4823	-7.23732	-14.4505	-11.1087	-15.0569	-11.2482	-10.9023	-16.643	-11.199	-13.1145	-7.57029	-22.1736	-20.5157	-18.8684	-20.0346	-14.5328	-13.4695	-16.4052	-14.619	-18.4045	-20.1983	-23.1454	-19.6343	-13.1942	-11.8664	-31.6409	-19.0166	-17.9929	-10.0333
Alteromonas macleodii 'Deep ecotype'	-14.5041	-10.3871	-13.5408	-6.65171	-8.42164	-10.2184	-14.0826	-12.939	-12.1604	-16.1219	-5.79982	-4.85645	-12.2345	-5.84859	-8.48103	-7.38436	-8.01212	-7.02422	-5.81039	-7.6883	-11.3196	-3.55664	-10.6146	-9.46618	-9.47462	-10.2925	-4.22072	-8.93161	-7.02472	-7.79563	-7.02868	-16.8615	-15.7935	-13.9933	-17.1653	-11.7889	-14.1282	-12.2811	-16.2575	-15.1878	-11.101	-16.0434	-12.4343	-9.26117	-11.7822	-23.4808	-17.1865	-15.341	-9.08869
Anabaena variabilis ATCC 29413	-8.00163	-6.41964	-15.8521	-8.08322	-4.31806	-4.89838	-18.7093	-6.07572	-7.14352	-6.19509	-0.643793	-6.09089	-14.5237	-4.44797	-4.78312	-1.14498	-4.28381	-7.45777	-6.11815	-6.78847	-5.22511	-1.71376	-8.067	-2.79945	-1.66409	-2.14718	-4.93066	-6.06593	-7.18572	-5.56213	-5.85009	-18.2001	-10.1394	-9.09106	-13.3934	-4.26034	-1.94927	-6.30279	-6.02498	-8.22613	-17.6623	-19.7262	-17.7689	-4.44074	-7.79162	-16.1892	-19.902	-17.4121	-5.65206
Anaeromyxobacter dehalogenans 2CP-C	-8.83737	-2.62839	-18.2393	-2.75843	-6.63764	-4.38318	-14.0597	-5.38454	-6.57828	-7.79443	-7.9882	-1.89636	-9.88968	-0.995345	-4.55686	-5.57915	-4.08168	-6.14235	-5.88119	-6.93782	-0.745334	-2.59032	-3.93843	0.0171636	-3.97543	-1.72433	-2.39172	-5.2112	-0.290082	-3.19555	-0.224309	-13.7168	-5.30512	-5.46172	-5.65214	-4.11972	-10.5306	-8.72378	-12.6508	-12.4281	-10.8069	-14.9542	-9.10571	-8.53861	-7.02534	-18.0738	-10.9323	-9.14187	-3.21915
Anaeromyxobacter sp. Fw109-5	-7.97103	-2.72331	-17.5251	-2.79893	-5.7215	-3.44701	-11.4597	-2.56755	-3.74929	-7.06629	-6.06363	-2.91391	-6.16315	-3.05208	-5.58521	-5.65308	-6.10747	-6.18579	-6.90842	-9.03717	-1.9159	-1.60366	-6.06824	-5.1907	-8.17454	-3.89483	-3.45821	-7.31872	-2.39555	-1.35518	-2.3008	-13.075	-3.51194	-5.64942	-5.84878	-4.25183	-10.6923	-8.90236	-12.8084	-12.5227	-9.10209	-17.3375	-13.3849	-10.6474	-13.1197	-17.3131	-9.24298	-6.47777	-7.27017
Anaplasma marginale str. St. Maries	-9.18148	-5.29618	-17.1683	-5.09119	-7.54233	-8.59962	-18.8081	-7.23168	-7.758	-11.2946	-5.93007	-1.28379	-11.2967	-3.75837	-6.15776	-3.19364	-6.28732	-6.18055	-5.92934	-5.31322	-10.1954	-0.685444	-6.34186	-7.03459	-6.61861	-5.55229	-3.88443	-9.93086	-3.88301	-3.49254	-2.45117	-13.5385	-11.3264	-10.3389	-11.2134	-8.55125	-12.2959	-13.8201	-14.353	-12.7857	-12.4341	-15.5222	-11.4953	-11.5259	-9.48492	-18.0108	-11.8749	-11.0918	-4.73375
Anaplasma phagocytophilum HZ	-12.6004	-8.96246	-21.7352	-7.55801	-9.94095	-12.5918	-23.7816	-11.6004	-11.0863	-15.3571	-8.49406	-3.32412	-13.7968	-6.24507	-9.49188	-5.03069	-9.84039	-8.70606	-9.25665	-8.38198	-14.1054	-4.10167	-9.80694	-9.98902	-9.45698	-9.21961	-6.75078	-14.049	-6.69433	-8.7263	-5.31693	-17.5413	-14.4619	-14.5862	-15.2805	-12.2751	-15.36	-16.9581	-17.3984	-17.003	-16.0204	-18.4695	-15.243	-14.9737	-14.2147	-22.7811	-16.4186	-16.5266	-8.24336
Anoxybacillus flavithermus WK1	-8.27635	-5.61061	-14.2866	-6.62586	-5.72381	-3.8984	-10.1942	-3.26208	-2.60937	-1.84738	-2.5262	-4.67563	-7.57115	-5.68797	-6.63182	-5.71045	-10.2054	-5.78636	-6.04791	-2.95963	-9.46964	-3.23522	-5.44087	-5.09413	-6.04158	-6.23422	-5.89583	-7.63122	-6.19074	-6.10265	-5.56327	-8.15565	-6.50153	-4.85448	-4.021	-4.52251	-4.45765	-3.39257	-4.60713	-5.3958	-2.18322	-11.1269	-8.61931	-3.1842	-3.85664	-7.62414	-7.00037	-6.97645	-6.02769
Aquifex aeolicus VF5	-2.44999	2.04939	-11.4889	-1.85247	2.08848	-3.67385	-15.0622	-6.37176	-6.83177	-8.94307	-3.64949	0.413471	-2.73402	0.501997	-1.13482	-0.796843	-0.653099	-3.17921	-3.17411	-0.961796	1.61958	0.346856	1.33282	-4.36539	-2.88994	-0.530778	0.75152	-2.77473	-0.165577	-4.60755	2.1911	-6.8952	-4.88805	-3.11665	-4.64143	-0.334553	-5.64298	-6.30553	-6.70751	-6.32177	-9.03667	-8.79731	-4.35838	-8.49208	-6.95554	-10.7082	-8.47944	-5.51373	-0.172217
Arcobacter butzleri RM4018	-12.5828	-11.0866	-21.3954	-9.34826	-12.1671	-12.6294	-26.3116	-12.4581	-11.8595	-13.8689	-8.53723	-6.55737	-13.3141	-7.63587	-7.31996	-8.08283	-7.92085	-9.22394	-9.76779	-5.58764	-12.3133	-5.7166	-9.77729	-12.6424	-14.4376	-9.82834	-8.70658	-11.427	-8.76616	-6.09548	-6.30651	-15.3161	-16.1176	-15.474	-17.731	-11.7403	-17.4314	-20.2468	-20.561	-18.7978	-16.7933	-18.2286	-16.2219	-17.3584	-16.0397	-26.7903	-12.4397	-14.3987	-6.92702
Aromatoleum aromaticum EbN1	-10.1021	-4.81535	-21.8086	-2.83754	-4.80222	-11.5084	-20.8566	-7.74955	-7.91898	-15.334	-6.13755	-2.93208	-16.4377	-4.10652	-6.61207	-7.72326	-7.13178	-5.22632	-8.93473	-6.13416	-5.08302	-3.61675	-4.19547	-6.39483	-7.36868	-7.0604	-5.52225	-7.42166	-5.49839	-3.51119	-5.37468	-18.4355	-12.7157	-8.83335	-13.0424	-8.38106	-11.8512	-18.0781	-16.963	-12.6145	-17.3988	-24.7242	-15.6646	-13.7528	-11.2106	-24.5485	-17.5545	-15.8159	-2.31959
Arthrobacter aurescens TC1	-2.099	0.186805	1.19811	-6.83664	-0.800335	-2.50692	2.15284	-0.745229	0.0850405	-4.32765	-2.1358	0.0683599	-0.431185	-1.10525	-4.61144	-6.72163	-5.13122	-5.22539	-6.93411	-7.13188	-6.07908	-2.61644	-3.19247	-1.39001	-3.36411	-4.05651	-5.52075	-6.41926	-4.49597	-1.50752	-3.37295	-4.42693	-2.71084	-2.82901	-1.03783	-3.37802	-3.84743	-6.07394	-1.95932	0.387633	-2.39167	1.28507	4.34204	-3.75032	-5.20844	1.45702	-8.54704	-3.80787	-2.31844
Arthrobacter sp. FB24	-0.0140601	0.246352	-3.6178	-6.81172	-2.74817	-3.46728	2.41049	0.372975	1.19521	-2.15406	-1.08791	-0.919765	-2.2526	-4.07008	-4.59412	-5.67637	-7.11555	-5.19932	-5.9171	-9.06906	-3.97079	-1.60795	-2.11002	-1.2577	-7.23841	-2.94938	-3.47937	-5.35279	-4.42938	-3.40647	-2.32518	-5.19238	-1.57873	-2.70983	-1.91227	-2.2943	-1.74446	-3.95999	-2.85917	-0.552918	-2.19869	5.53677	1.5239	-4.68218	-5.14973	-0.390313	-3.34449	-3.58783	-2.28646
Aster yellows witches'-broom phytoplasma AYWB	-6.88445	-8.79603	-15.693	-5.63901	-7.62762	-8.66286	-15.2611	-7.80383	-7.39474	-7.68762	-4.38137	-5.20331	-9.79945	-5.59871	-5.1463	-6.00517	-7.16634	-6.74658	-6.0727	-7.37754	-9.51215	-4.11602	-8.96118	-9.37742	-9.31209	-8.44078	-6.32973	-8.669	-5.31241	-6.62247	-6.85719	-14.5738	-9.34689	-9.33423	-9.28234	-6.96001	-9.27403	-9.71822	-10.449	-10.7002	-10.8671	-13.6266	-11.7398	-9.23235	-9.07117	-15.4679	-12.4931	-12.8145	-5.73324
Azoarcus sp. BH72	-10.3947	-4.30641	-22.3156	-5.61466	-3.34851	-14.1625	-19.7677	-7.79578	-8.02563	-12.9027	-8.73784	-3.8444	-11.027	-5.79875	-6.45423	-3.3171	-7.98737	-1.98216	-6.7859	-7.60577	-8.17967	-4.54529	-5.5081	-6.29703	-6.30889	-3.14867	-0.162925	-10.8361	-5.93686	-3.66377	-1.96293	-16.5915	-14.6266	-9.83924	-14.0065	-10.6797	-14.9962	-18.1364	-18.1282	-17.1075	-14.8777	-18.757	-13.221	-16.1681	-14.6999	-24.2871	-14.9498	-15.0885	-4.04465
Azorhizobium caulinodans ORS 571	-6.22943	-4.9038	-15.0874	-3.87411	-4.87923	-9.56682	-17.2467	-4.92892	-6.08585	-8.59507	-4.20931	-6.95074	-6.71095	-7.15827	-7.6374	-5.78927	-7.15461	-8.26385	-7.96005	-3.22801	-7.24527	-3.62956	-9.31904	-8.59341	-9.55618	-7.21967	-5.58335	-9.51934	-4.59772	-4.66222	-7.44538	-8.79502	-11.9145	-12.0119	-12.2313	-9.50633	-10.0058	-10.2494	-13.1131	-13.703	-6.69424	-12.1109	-6.94234	-11.8539	-9.29724	-20.7781	-4.86391	-4.15332	-6.36715
Bacillus amyloliquefaciens FZB42	-7.96703	-4.98443	-1.45398	-6.45901	-6.05245	-5.93541	-13.5654	-4.24994	-5.51004	-7.05507	-3.49519	-4.80154	-3.24915	-5.59648	-5.33861	-5.03894	-12.8797	-9.80127	-10.6821	-1.2808	-9.63258	-3.49861	-8.09186	-4.63925	-3.65684	-5.57865	-5.9296	-9.44563	-3.59075	-5.14712	-5.69931	-6.58323	-10.9803	-10.2371	-9.39058	-6.25113	-8.48187	-12.5745	-9.62228	-5.78652	-3.04228	-11.6924	-4.41816	-5.79562	-7.36629	-10.5349	-3.06159	-7.14726	-8.866
Bacillus anthracis str. Ames	-5.74649	-4.25305	-12.2542	-5.01559	-4.17814	-3.79298	-14.8769	-0.684848	-0.784857	-8.66386	-6.50032	-4.03862	-4.89248	-2.35682	-5.73546	-5.03567	-10.2419	-6.39938	-5.06387	-2.60494	-6.90229	-2.6841	-3.82016	-2.40108	-2.30421	-4.84851	-3.82026	-6.89349	-2.99442	-4.26837	-4.72104	-12.3587	-9.73097	-11.7353	-12.0062	-6.01218	-4.63623	-6.95185	-9.72318	-6.05524	-7.97553	-14.8055	-10.1361	-3.25168	-1.63388	-14.7192	-5.1956	-7.6218	-4.55769
Bacillus cereus ATCC 14579	-7.7026	-4.22401	-10.1529	-6.00389	-6.15359	-3.77446	-13.7356	-0.618851	-1.72411	-8.57268	-6.47563	-5.03029	-5.78731	-2.34069	-4.7273	-2.01607	-8.23472	-5.38883	-5.05483	0.426797	-7.84665	-3.67923	-4.77766	-1.3325	-5.24163	-5.79632	-3.80084	-8.86306	-4.96119	-5.21743	-5.69837	-13.2189	-10.6611	-12.674	-10.94	-8.96941	-5.58252	-6.89178	-9.67134	-5.0257	-3.86125	-12.6531	-9.03031	-4.21869	-2.60621	-11.6387	-4.07754	-10.4905	-6.54155
Bacillus clausii KSM-K16	-5.53501	-6.40974	2.39529	-5.66198	-4.44207	-4.23401	1.82806	-0.979661	-1.19863	-1.18389	1.18271	0.14006	-4.29371	-1.8625	-3.48841	-3.40303	-9.01892	-8.03578	-5.81717	-1.71153	-7.35909	-1.55981	-3.64458	-2.51395	-3.52126	-2.33288	-3.23687	-5.95821	-3.04944	-4.83278	-5.0471	-8.9386	-5.84065	-4.03669	-4.21023	-5.81961	-6.16539	-2.32197	-5.29396	-5.21038	-4.16466	-3.12522	-6.49514	-1.28724	-0.805223	-3.53558	-3.25393	-10.4131	-7.10099
Bacillus halodurans C-125	-5.49636	-6.3814	-3.52475	-8.64912	-7.41648	-5.21446	-1.06014	0.0712209	-2.15079	-3.10632	-7.79542	-4.85558	-10.2197	-4.84508	-7.47916	-6.37964	-9.0104	-8.02128	-7.80867	-5.68245	-10.3097	-4.55584	-7.607	-5.45416	-9.46287	-6.2823	-6.21664	-7.92489	-8.01849	-5.78627	-7.02404	-11.8422	-5.78162	-3.98233	-5.15403	-7.78113	-5.11879	-5.27082	-3.24832	-8.18217	-7.08497	-6.02282	-8.41908	-4.2546	-5.77642	-6.46707	-9.16954	-11.3229	-9.08558
Bacillus licheniformis ATCC 14580	-5.63797	-4.4848	1.18103	-4.69562	-3.50958	-0.285556	-4.47161	-3.11615	-3.32682	3.60894	-4.87553	-2.87187	-0.493262	-1.90843	-4.51246	-4.46439	-8.04105	-3.07341	-4.83942	-4.78882	-7.49066	-3.57029	-3.74467	-3.67338	-7.67645	-4.46703	-5.29029	-5.04589	-6.13168	0.0434677	-4.10808	-3.19875	-1.99828	-3.18148	-3.36025	-3.922	-1.28962	-1.45846	-3.41551	-2.28509	-1.37956	-3.40184	-3.6999	0.626358	0.118785	-3.71841	2.51873	-0.656622	-5.1417
Bacillus pumilus SAFR-032	-6.94835	-4.97013	-3.41699	-8.45178	-8.03915	-4.92517	-10.5139	-5.22657	-5.4879	-6.01838	-5.48457	-4.79981	-7.21629	-3.58737	-6.33312	-5.02623	-9.87457	-6.79275	-5.67725	-5.26652	-10.6087	-3.49646	-4.07367	-5.61064	-6.62821	-7.55348	-5.91914	-5.42794	-6.57554	-5.12451	-5.68755	-10.5408	-6.95229	-9.21082	-8.36385	-8.23233	-7.45944	-12.5501	-7.60016	-6.77223	-8.00703	-8.64776	-8.38414	-5.77902	-3.35128	-8.50221	-10.024	-12.1077	-9.85794
Bacillus subtilis subsp. subtilis str. 168	-6.5465	-2.41815	-2.62853	-6.66577	-5.44965	-4.2398	-11.2052	-2.99483	-5.21288	-6.20697	-3.82379	-4.86125	-6.31581	-4.86766	-6.49113	-3.40995	-11.0214	-5.04005	-7.81968	-4.72016	-9.37378	-4.56098	-7.65575	-3.53173	-1.5386	-4.34789	-5.24287	-7.96808	-5.05863	-3.8466	-8.05393	-6.96739	-7.85822	-8.05285	-8.22695	-6.83105	-5.17925	-7.33718	-6.30753	-4.21875	-2.18846	-10.1558	-3.51783	-1.29693	-3.81376	-4.55596	-0.27912	-7.44006	-6.10556
Bacillus thuringiensis str. Al Hakam	-6.30725	-0.957376	-8.25934	-2.89605	-2.92561	-2.60199	-10.4872	0.960213	-0.1888	-7.75507	-6.25314	-2.96266	-2.88116	-2.18934	-3.65258	-3.82855	-7.16823	-4.28592	-3.97549	-1.28516	-5.34435	-1.63747	-3.39452	-1.71486	-4.67017	-5.31618	-3.62015	-5.57791	-1.65812	-2.75421	-4.48804	-11.0194	-8.03642	-10.121	-10.3471	-7.58274	-4.10036	-6.35445	-9.20486	-5.75667	-5.87848	-12.3527	-8.11503	-1.91505	0.650545	-11.9188	-1.05643	-4.36394	-4.39602
Bacillus weihenstephanensis KBAB4	-6.99614	-4.4161	-11.8391	-5.08177	-6.3151	-2.89615	-12.6912	0.932817	-0.135704	-5.18365	-5.64071	-5.08969	-10.5097	-3.44606	-3.78208	-2.14271	-7.2829	-4.45657	-4.11695	-1.78454	-7.21817	-3.71309	-3.0617	-0.790892	-1.65642	-4.14084	-4.92833	-7.0623	-5.18164	-5.55586	-4.84736	-14.1815	-9.13053	-11.0834	-10.385	-7.25501	-5.94252	-6.2952	-8.01847	-6.22246	-7.64715	-14.7058	-11.755	-1.43672	-0.788279	-11.1791	-6.88639	-8.39458	-7.65002
Bacteroides fragilis NCTC 9343	-11.7025	-6.53153	-9.95421	-4.71628	-5.55141	-4.31747	-20.6608	-11.2024	-11.4077	-17.5213	-7.91201	-1.87959	-10.6201	-3.93686	-3.52713	-3.50211	-5.0545	-1.09628	-1.85312	-5.83715	-3.57311	-2.5768	-4.80739	-3.77344	-1.77345	-4.55067	-2.32341	-4.10003	-4.18308	-8.03399	-5.14597	-19.3643	-11.0974	-10.2722	-13.4545	-9.98607	-10.3675	-11.5442	-11.4917	-11.3316	-11.5162	-10.5781	-10.8299	-10.4274	-8.9283	-15.8332	-13.6257	-10.8117	-3.16696
Bacteroides thetaiotaomicron VPI-5482	-13.3242	-4.969	-3.29696	-4.90079	-6.93565	-5.6096	-21.5398	-10.0641	-9.21132	-17.79	-6.26269	-1.96531	-10.9186	-1.19605	-1.65586	-3.837	-3.17117	-0.290646	-0.978848	-4.29759	-6.36592	-2.6392	-4.41096	-4.74131	-1.69493	-3.33711	-1.62811	-3.59056	-3.67125	-7.77422	-4.49728	-17.0687	-13.063	-12.1447	-13.3724	-8.59937	-15.121	-13.3774	-14.2249	-11.7683	-11.919	-9.40598	-10.153	-10.9283	-9.36075	-16.9495	-12.0987	-9.41027	-3.4023
Bacteroides vulgatus ATCC 8482	-11.4951	-5.38045	-7.52207	-6.64868	-3.41562	-4.2138	-18.0564	-9.92707	-9.14919	-16.1037	-7.79469	-0.855435	-8.21719	-0.84449	-0.478848	-2.37885	-2.01011	-1.02079	0.191614	-5.68147	-5.30803	-3.55571	-2.60574	-2.45216	-1.46091	-3.2806	-3.21596	-4.92377	-5.01745	-9.78471	-7.02326	-11.8389	-11.7796	-9.9805	-10.1521	-8.77984	-11.1172	-8.2691	-15.2468	-13.1812	-13.0823	-11.0194	-9.41654	-8.2535	-7.77545	-21.4648	-9.16671	-10.3199	-3.08506
Bartonella bacilliformis KC583	-9.73062	-7.10463	-17.9275	-6.71309	-7.07749	-13.7454	-18.0048	-4.72543	-5.20952	-12.532	-5.57652	-2.48244	-9.93135	-5.33094	-6.65913	-5.14605	-9.02095	-7.86918	-6.43523	-6.49352	-11.2642	-4.20325	-6.9386	-7.15294	-7.62117	-6.3752	-4.8553	-10.2339	-4.79575	-6.854	-3.4209	-11.704	-9.63162	-10.7632	-10.446	-9.42093	-12.5223	-13.1245	-13.5617	-14.1713	-11.1601	-14.6298	-12.3904	-13.1553	-13.4128	-18.9858	-10.5594	-8.66189	-6.38203
Bartonella henselae str. Houston-1	-7.03403	-6.51015	-15.864	-5.32808	-7.46484	-14.2253	-16.3023	-5.97312	-5.43907	-10.3418	-6.39248	-5.80571	-10.2918	-5.21137	-6.50488	-4.37829	-8.99068	-7.60226	-6.46572	-6.60759	-9.86537	-4.2964	-9.25052	-6.82169	-7.32435	-5.99291	-4.91063	-10.1473	-4.82931	-6.172	-5.47151	-10.3557	-10.339	-9.54441	-10.1081	-8.87391	-10.1333	-12.7802	-14.1901	-15.815	-10.5755	-14.2621	-10.8769	-12.9383	-14.3553	-20.0459	-10.003	-11.0527	-5.74993
Bartonella quintana str. Toulouse	-8.72372	-5.00003	-15.4439	-4.56435	-6.03791	-11.5348	-14.3058	-5.75424	-5.25315	-10.2073	-4.93454	-2.63515	-9.89373	-4.68061	-5.4727	-4.29616	-6.73297	-7.67362	-5.19732	-5.63104	-10.0416	-3.47914	-7.91806	-4.89886	-6.38145	-4.20313	-4.05556	-8.84444	-4.0214	-5.88625	-3.62476	-11.4523	-8.32263	-8.40052	-10.1682	-8.2906	-10.2612	-11.8321	-12.2973	-13.8539	-9.08418	-13.3982	-11.2524	-10.7379	-11.8686	-17.4083	-9.48331	-8.62985	-5.3118
Bartonella tribocorum CIP 105476	-10.9622	-9.49495	-21.3864	-8.75876	-10.5512	-17.1057	-22.9884	-9.82774	-9.24381	-15.8346	-8.16955	-7.47799	-12.5572	-7.22477	-10.6514	-8.43902	-13.2554	-10.5167	-10.0717	-9.07503	-14.5275	-6.42756	-11.1647	-10.7688	-12.5022	-10.9517	-7.24012	-13.5443	-7.24445	-9.37808	-7.82431	-16.3732	-13.2636	-12.605	-12.9079	-11.0758	-14.6863	-15.4654	-17.8043	-19.1608	-13.9956	-17.2759	-14.4108	-16.6398	-18.3006	-24.7686	-14.5896	-13.5555	-9.45231
Baumannia cicadellinicola str. Hc (Homalodisca coagulata)	-5.9344	-3.80085	-10.19	-1.27227	-0.969375	-6.4852	-11.8325	-4.70316	-4.33634	-7.68825	-2.72031	-3.18897	-5.6764	-1.20493	-2.94796	-4.65967	-4.94706	-3.38956	-2.92466	-2.59443	-2.42853	-2.01487	-2.96339	-3.31773	-4.47349	-2.69417	-0.773312	-1.95318	-1.71275	-2.92336	-1.26814	-9.25034	-6.10149	-5.11798	-7.05254	-5.8954	-7.98267	-9.38383	-9.2492	-8.46754	-8.71769	-10.3353	-8.50016	-5.90902	-5.77297	-11.0068	-7.48148	-6.84346	-4.08049
Bdellovibrio bacteriovorus HD100	-13.7981	-14.8543	-27.1212	-11.3923	-12.931	-12.8419	-30.1022	-15.0399	-14.3108	-21.7242	-8.39909	-8.78623	-17.9551	-7.51333	-11.2874	-6.92234	-8.83171	-10.7221	-9.63675	-9.15134	-11.4164	-6.47877	-10.9273	-11.3808	-10.3976	-9.35023	-9.83417	-13.2837	-11.4529	-11.9426	-4.59231	-21.2036	-17.7274	-18.9991	-18.1493	-13.0808	-15.2791	-17.3539	-16.4221	-19.6565	-19.727	-26.2935	-21.1134	-13.6445	-12.2292	-29.2397	-19.7254	-19.7937	-13.7922
Bifidobacterium adolescentis ATCC 15703	-5.84044	-1.35976	-2.07957	-4.34068	-4.33041	-7.08354	-5.78836	-5.74704	-6.20128	-5.51817	-1.8893	-5.19514	-1.15399	-0.768245	-7.72902	-7.19811	-10.2733	-6.723	-5.84443	-4.29341	-6.86555	-0.980073	-4.05741	-6.88073	-7.42998	-6.04422	-1.56478	-5.36706	-3.48368	-5.0227	-7.12559	1.59111	1.59444	2.34471	1.8564	0.234617	-4.1197	-5.79772	-4.19207	-4.78865	-2.47526	-3.30789	0.18507	-3.00421	-5.5085	-6.33221	-2.93493	-1.95555	-0.559271
Bifidobacterium longum NCC2705	-5.34891	0.114271	-5.85576	-3.96366	-4.87346	-4.60009	-5.75416	-4.23822	-3.68452	-5.28309	0.80043	-1.76904	1.29059	-3.12069	-7.49233	-6.72992	-9.0632	-6.42651	-5.70387	-3.7238	-2.49967	-1.38504	-4.56443	-4.55925	-5.14595	-5.72434	-2.97436	-2.1396	-1.90117	-3.57226	-5.53716	-1.09018	-1.083	-0.358859	0.199784	1.67598	-6.73821	-8.43766	-6.82141	-3.38324	-1.05613	-0.986652	-0.417473	-7.65931	-5.2119	-4.14849	-4.54153	-0.545712	-0.0474755
Bordetella bronchiseptica RB50	-8.48541	-6.07868	-24.6578	-9.9453	-6.02991	-9.68098	-22.0444	-11.2974	-11.4274	-14.1226	-7.35345	-3.99159	-12.2807	-1.25889	-6.68663	-6.91553	-10.1986	-6.33413	-5.01092	-6.41545	-12.5709	-5.65589	-9.56726	-9.99312	-9.92936	-9.53472	-2.70287	-12.7089	-5.79552	-5.96389	-3.58417	-15.5471	-10.3168	-12.3704	-11.6133	-8.7573	-13.3173	-14.5958	-14.415	-15.8786	-13.3114	-16.9234	-12.5194	-14.0533	-16.4669	-21.2422	-16.5074	-14.8595	-10.4618
Bordetella parapertussis 12822	-7.64658	-6.49105	-22.837	-9.6984	-6.51518	-10.2898	-21.4968	-10.1276	-10.3376	-12.4084	-7.8804	-3.87289	-10.5101	-0.912241	-7.51444	-7.46945	-9.04286	-6.07649	-4.84126	-6.79528	-13.5017	-4.57116	-9.75304	-9.68673	-9.68941	-10.4782	-2.29472	-14.0531	-5.13855	-5.96687	-4.11315	-16.2207	-11.0115	-12.1936	-11.3728	-7.93055	-12.3	-14.4699	-14.4257	-16.2913	-13.3977	-17.4252	-12.7172	-14.3808	-16.8875	-21.7337	-16.5004	-14.6772	-10.1451
Bordetella pertussis Tohama I	-6.54116	-7.6533	-20.6228	-10.2845	-8.74126	-9.69536	-19.4096	-7.72586	-8.01228	-10.2252	-7.25264	-4.76443	-8.52069	-2.38343	-8.20271	-6.73782	-10.7518	-8.59289	-6.56182	-6.95328	-11.0875	-5.4466	-11.6768	-10.9895	-10.0018	-10.9997	-3.68553	-14.0289	-6.24215	-5.63124	-5.42659	-12.6443	-10.345	-11.637	-11.7844	-9.82079	-12.9709	-15.0196	-13.1171	-15.4549	-11.262	-14.7077	-11.6621	-14.4104	-17.0149	-20.7927	-10.2286	-9.27368	-10.6762
Bordetella petrii DSM 12804	-11.5141	-10.098	-20.7226	-10.9531	-10.0465	-10.6935	-22.1348	-11.3394	-10.4662	-11.1819	-10.3696	-5.99647	-9.34628	-3.26988	-7.69204	-5.92915	-8.20346	-6.3416	-7.01665	-8.43635	-8.60738	-4.65891	-9.59505	-16.0379	-11.9708	-13.5696	-4.71599	-10.7296	-6.81751	-7.99749	-5.59944	-11.634	-9.36214	-9.41055	-9.65632	-10.7853	-17.3523	-15.6348	-18.4488	-16.8981	-9.38251	-12.0175	-6.5857	-16.0754	-15.4855	-21.2944	-5.5814	-6.9411	-7.47229
Borrelia afzelii PKo	-8.2496	-9.57842	-16.2181	-6.14919	-5.57603	-8.17353	-13.1857	-8.26291	-7.7539	-8.89139	-7.27114	-1.97645	-10.4351	-5.01626	-7.06114	-5.72786	-8.37384	-8.27866	-5.80246	-4.08151	-4.67853	-2.83902	-6.45186	-9.55011	-7.0204	-6.80639	-4.47071	-6.5583	-4.423	-5.38609	-4.03828	-14.1045	-12.0054	-11.1106	-11.8351	-9.88166	-12.9218	-14.5088	-13.9583	-12.5464	-12.6451	-14.0394	-13.8466	-12.4818	-13.6783	-19.2308	-13.0419	-13.1651	-5.86975
Borrelia burgdorferi B31	-11.8886	-12.4099	-20.1527	-9.40039	-8.38197	-12.1333	-18.8788	-10.7934	-10.2469	-13.5898	-8.91877	-6.26006	-13.2061	-6.80161	-10.802	-8.24806	-12.3492	-11.79	-9.92679	-6.33423	-8.92548	-5.01956	-9.10547	-12.9446	-10.4972	-10.1081	-6.60369	-10.4402	-6.52305	-8.0743	-6.16462	-17.4728	-14.4695	-14.7218	-14.2056	-11.8184	-16.1784	-17.8583	-17.2517	-14.8456	-15.5298	-17.3714	-16.8716	-16.0668	-17.5759	-22.4093	-15.9917	-16.0107	-8.6063
Borrelia garinii PBi	-7.04609	-6.14678	-12.9673	-3.98095	-3.41813	-6.42668	-11.594	-7.09495	-6.62412	-7.13312	-5.84059	-1.27334	-8.15473	-3.68245	-5.07013	-4.10874	-7.19041	-6.07047	-3.85011	-2.19799	-2.03492	-1.63395	-4.20268	-6.87409	-4.47194	-4.41609	-2.78576	-3.77717	-2.78609	-3.37541	-2.35154	-11.3691	-8.1513	-8.15954	-8.04155	-7.39832	-10.1212	-11.6412	-11.1819	-9.60267	-10.2877	-11.3565	-10.3388	-9.33057	-10.277	-14.8012	-10.735	-10.9581	-3.60204
Bradyrhizobium japonicum USDA 110	-4.26231	-4.19578	-14.0364	-0.458407	-3.96308	-4.37855	-12.061	-7.205	-6.0622	-5.80339	-3.35588	-3.49916	-6.24022	-2.83852	-4.07348	-2.58847	-4.53728	-4.70776	-5.49036	-4.67315	-3.79485	-1.92685	-1.27875	-3.72541	-6.31576	-5.48595	-4.42216	-5.84524	-3.0733	-3.92613	-6.41725	-5.24547	-8.20379	-1.82817	-5.34733	-6.48204	-4.52235	-2.0865	-6.54418	-9.08926	-2.74109	-7.38678	-5.42626	-6.32127	-4.52056	-13.5822	-5.96687	-4.12666	-2.18792
Bradyrhizobium sp. BTAi1	-5.01131	-5.04603	-19.3731	-1.37124	-4.8371	-7.28555	-9.17074	-6.75455	-5.66127	-3.29328	-4.21309	-3.39035	-8.4118	-4.76752	-5.00163	-4.50994	-5.47423	-3.65826	-4.39424	-5.49953	-7.4871	-1.87104	-4.03912	-3.35287	-5.00718	-1.23936	-5.32997	-8.69382	-5.9056	-1.67	-6.31354	-7.10715	-6.78822	-6.48602	-8.95426	-7.23806	-4.20497	-3.72437	-9.23529	-11.9087	-9.82666	-8.08787	-9.62118	-9.15051	-4.37789	-16.095	-9.07652	-8.06877	-3.06414
Bradyrhizobium sp. ORS278	-7.61479	-6.80559	-14.3534	-3.25018	-7.63789	-10.1378	-15.7828	-5.0692	-5.04619	-1.4739	-4.98892	-3.25076	-4.19614	-4.64931	-5.90616	-3.37786	-6.39103	-6.58256	-8.26936	-5.223	-6.99526	-2.79904	-6.65855	-5.75011	-6.49738	-2.82882	-4.17957	-9.45439	-5.63084	-2.24762	-6.14058	-4.45109	-8.13516	-7.94119	-6.33642	-5.85421	-3.70816	-5.15947	-10.7555	-9.63605	-5.49035	-9.22124	-6.42934	-8.87781	-7.15264	-12.337	-4.7529	-5.52263	-4.89048
Brucella abortus biovar 1 str. 9-941	-3.85817	-4.101	-8.33889	-2.95713	-5.20871	-9.2808	-7.63543	-5.92008	-5.24215	-7.92481	-2.86155	-5.71348	-1.43292	-3.01893	-8.9299	-6.20661	-9.49214	-8.19401	-7.31919	-3.4204	-10.2134	-3.34552	-7.01005	-7.95934	-10.9444	-8.05304	-2.27068	-9.30324	-4.67677	-4.80418	-4.96968	-7.25145	-3.34195	-5.67431	-7.82572	-6.12341	-9.15328	-13.1375	-10.3036	-10.8971	-6.10042	-5.25831	-7.52566	-10.7634	-9.41079	-4.61549	-6.98453	-3.98431	-6.3429
Brucella canis ATCC 23365	-5.19735	-4.3785	-8.96942	-3.12749	-4.47826	-9.49127	-6.50483	-4.31531	-3.62059	-5.56581	-4.05611	-5.73766	-1.96179	-4.20334	-9.07473	-4.47765	-10.6304	-8.40246	-6.44848	-2.68616	-10.6474	-3.39893	-7.34136	-8.46901	-9.47022	-6.52558	-3.48022	-8.67237	-5.95839	-4.21465	-4.19947	-5.92727	-4.83773	-6.15242	-7.29981	-5.47084	-9.55913	-13.5744	-8.70814	-10.1782	-7.66463	-4.95996	-8.07927	-12.0892	-11.7171	-6.19821	-8.58929	-6.60887	-5.51311
Brucella melitensis 16M	-5.0924	-3.29331	-6.77288	-3.07648	-5.39591	-8.42712	-4.23341	-5.19202	-4.50268	-5.36645	-4.99598	-5.72997	-0.795869	-3.14698	-9.03199	-4.39528	-9.58969	-8.34019	-6.41048	-2.60416	-11.5131	-3.38314	-8.23888	-8.31089	-8.30762	-6.37982	-3.41611	-9.55997	-4.87141	-4.08756	-4.12896	-3.71497	-3.68384	-6.00447	-6.1527	-5.36357	-8.43351	-12.439	-11.5831	-11.0921	-5.48751	-2.73922	-6.90581	-11.9893	-10.6236	-7.0175	-6.39953	-5.41245	-6.46147
Brucella ovis ATCC 25840	-6.4173	-4.73105	-7.53836	-2.71084	-4.84383	-8.99353	-7.5378	-4.41935	-3.76091	-6.10583	-3.60764	-6.68449	-1.77508	-2.76977	-8.71026	-5.8341	-9.28109	-6.89107	-8.12004	-5.0718	-9.64973	-4.2644	-6.57886	-7.30267	-8.26023	-7.43335	-1.98837	-7.79841	-5.30877	-3.27221	-4.66307	-3.41436	-4.70402	-5.05304	-6.21501	-5.66865	-8.62614	-12.5726	-7.77616	-11.5195	-4.40003	-3.39334	-6.83426	-11.3268	-9.99422	-6.86339	-7.23306	-5.21382	-6.10685
Brucella suis 1330	-5.23811	-5.41142	-7.04611	-3.14691	-5.50998	-9.51595	-5.61082	-5.36344	-4.66658	-8.64347	-4.07944	-5.74071	-2.02679	-4.22506	-9.09084	-6.50927	-10.6457	-8.42612	-8.46279	-2.71795	-11.6996	-3.40489	-7.38114	-8.53051	-9.53333	-5.58206	-2.50494	-9.71557	-5.99213	-4.26402	-5.2267	-7.01052	-4.89762	-5.20987	-6.35704	-6.51245	-9.60792	-13.6271	-8.75668	-10.2115	-5.73405	-5.0466	-7.14718	-13.1277	-11.753	-7.26848	-8.66365	-5.68594	-6.53293
Buchnera aphidicola str. APS (Acyrthosiphon pisum)	-4.72751	-2.5888	-10.8548	-1.20749	-0.837343	-7.23531	-11.523	-4.4526	-4.09686	-7.47646	-3.5746	-3.18605	-6.42078	-0.126215	-1.916	-3.59464	-0.911867	-1.32673	-0.901715	-2.42578	-3.19477	-0.999143	-1.74496	-4.08987	-3.30003	-3.54164	-0.659824	-0.814222	-1.58641	-1.77705	-2.14619	-7.94986	-7.82847	-6.8554	-7.78259	-5.66462	-6.69761	-7.08813	-9.98832	-9.20544	-6.45646	-9.04197	-9.21815	-6.62639	-6.50287	-13.6885	-7.2568	-7.62716	-4.9535
Burkholderia ambifaria AMMD	-5.56123	-5.77262	-13.2185	-3.23491	-6.61068	-9.11749	-8.59783	-4.97922	-4.96498	-6.36245	-5.95872	-4.23441	-6.04042	-4.63267	-4.89451	-5.35903	-6.3809	-4.57223	-3.25447	-0.185394	-4.92838	-2.79053	-5.607	-6.66773	-4.42662	-5.77146	-3.15868	-5.42159	-1.59288	-6.18914	-2.11633	1.75984	-6.04742	-6.86726	-6.25338	-6.8024	-5.64144	-10.0838	-11.6912	-11.5999	-6.31963	-7.98542	-6.27575	-8.84048	-10.1219	-18.2356	-3.58195	0.674781	-5.86854
Burkholderia cenocepacia AU 1054	-5.49231	-5.73	-10.0461	-3.21555	-5.57551	-10.0913	-14.3608	-8.86436	-7.86114	-8.21891	-6.91988	-3.21414	-3.84289	-4.611	-4.87986	-4.33441	-6.36816	-4.55885	-3.23589	-0.136911	-6.84221	-2.77992	-3.54063	-5.5615	-5.33495	-4.69702	-4.13158	-5.37913	-0.543758	-9.11346	-2.0848	1.02697	-5.93473	-6.77202	-6.14671	-5.73574	-4.55573	-8.98675	-9.60868	-11.5536	-6.10325	-9.68737	-6.08065	-7.79224	-9.08217	-15.1055	-1.36469	2.92493	-5.84071
Burkholderia mallei ATCC 23344	-7.51149	-0.0962786	-13.7167	-4.95241	-5.04496	-9.69237	-11.1267	-7.33556	-6.46273	-11.1766	-7.36812	-3.99603	-4.34033	-5.26889	-5.69155	-5.92792	-7.20303	-3.34092	-2.01613	-1.43446	-7.60408	-3.65864	-2.59254	-4.03387	-4.96708	-8.56642	-3.7148	-5.72777	-2.81552	-6.99446	-2.59806	-5.6261	-6.35804	-7.40693	-9.65244	-6.78281	-10.3491	-12.6312	-12.4458	-11.8964	-4.37606	-10.009	-5.5797	-13.0734	-10.4838	-10.2896	-3.5747	-2.93371	-5.47134
Burkholderia multivorans ATCC 17616	-7.37331	-4.65588	-17.751	-5.18272	-7.51427	-11.0455	-11.9544	-7.66844	-7.68363	-6.97074	-7.85287	-4.18102	-6.5092	-3.5729	-6.85533	-3.29081	-7.34682	-5.53537	-3.20517	-3.05293	-5.69308	-2.76248	-4.42592	-5.37747	-6.17509	-6.56681	-5.08416	-6.30506	-4.45822	-7.98166	-5.02952	-5.52275	-8.74067	-9.60731	-7.963	-6.62059	-7.40804	-9.81971	-11.4666	-11.474	-9.73808	-10.1865	-8.75027	-8.70833	-10.013	-16.8817	-1.99658	-2.65312	-4.7936
Burkholderia pseudomallei 1106a	-7.82703	-0.935015	-12.8946	-6.31294	-5.74485	-11.2172	-13.522	-7.43186	-7.37244	-10.914	-8.10875	-3.3211	-7.83282	-5.71361	-5.95498	-5.45003	-6.43352	-4.62305	-2.33267	-0.371399	-7.25928	-2.83544	-4.86251	-6.07449	-4.77346	-5.05169	-2.26093	-6.58305	-3.77933	-8.47616	-3.23459	-7.31629	-4.48402	-8.2334	-8.66649	-8.05954	-9.97342	-11.4607	-11.0113	-11.7806	-8.1894	-10.1931	-7.0551	-10.0245	-11.2735	-9.74104	-5.44858	-6.33133	-5.98068
Burkholderia sp. 383	-9.04797	-3.068	-11.4692	-3.38336	-2.85544	-11.2991	-15.3004	-4.81959	-4.71932	-5.36832	-4.2339	-5.40514	-4.52994	-3.77805	-7.01147	-3.52161	-7.48285	-5.66534	-3.40734	0.475054	-2.53225	-1.87863	-5.07419	-6.4078	-5.05297	-4.27603	-1.34355	-6.71585	-3.93041	-6.70801	-2.32896	-6.269	-9.84886	-9.53615	-10.0116	-6.27363	-6.25118	-11.777	-11.2801	-13.9346	-7.95688	-12.2718	-9.73634	-10.1755	-12.3987	-18.1658	-1.20409	-0.219453	-6.08143
Burkholderia thailandensis E264	-7.98305	-1.40763	-14.808	-5.0783	-3.30803	-6.89083	-11.648	-6.04683	-6.11707	-7.15634	-6.63334	-3.08684	-6.4765	-4.44148	-3.77962	-7.13728	-4.28075	-2.45368	-2.11408	0.224844	-5.20163	-2.71151	-5.04904	-5.77046	-4.63811	-5.1257	-1.92276	-4.05362	-3.1719	-7.54088	-3.84085	-1.13709	-9.10949	-9.06518	-10.3651	-7.24229	-5.92642	-6.27712	-11.003	-11.2137	-6.61097	-3.65704	-4.72178	-8.42713	-6.7803	-10.1549	-2.84931	-2.35291	-6.64514
Burkholderia vietnamiensis G4	-9.00935	-5.04486	-17.368	-5.3706	-4.83612	-9.28483	-14.1638	-6.7511	-7.65819	-10.2893	-5.21199	-6.38957	-9.40554	-5.76695	-7.00111	-5.50932	-9.47378	-8.65789	-7.39355	-1.49817	-7.4847	-3.87064	-7.03725	-8.34994	-7.00473	-3.2374	-3.32924	-4.69265	-2.90428	-7.66797	-4.31272	-11.0986	-9.78499	-11.4834	-11.9512	-11.2362	-10.2025	-14.7216	-14.2329	-13.9073	-11.8198	-15.0781	-10.6151	-14.1492	-13.3768	-17.0912	-8.06976	-8.06078	-8.06323
Burkholderia xenovorans LB400	-7.38636	0.730566	-15.3683	-3.50565	-2.02604	-6.42496	-14.5021	-6.43173	-5.26303	-9.05172	-2.42681	-3.56004	-5.66625	-2.87281	-3.11335	-3.62642	-3.57247	-4.7335	-3.54406	-2.75867	-2.94566	-1.9581	-2.39669	-2.90595	-0.463826	-0.603935	-1.4672	-0.921134	-0.154236	-5.04894	-2.46699	-2.834	-8.40932	-7.99631	-8.54175	-5.60316	-7.6801	-9.26672	-5.6988	-7.18196	-2.21258	-6.06349	-4.83813	-6.4057	-4.59197	-11.8253	-2.42092	-4.67173	-4.25438
Caldicellulosiruptor saccharolyticus DSM 8903	-5.88059	-7.26699	-1.58988	-5.3703	-8.37845	-1.6227	-4.24743	-6.82713	-6.18935	-10.1304	-4.29685	-1.65126	-8.0135	-6.45306	-4.38835	-6.35225	-3.96949	-5.47159	-4.82064	-7.64289	-7.96439	-3.14357	-7.05305	-6.51224	-6.42849	-8.67322	-5.63031	-9.14737	-4.8586	-10.6282	-4.27869	-2.45004	-2.93658	-2.29723	-1.47927	-2.11032	-3.98457	-2.88853	-6.13147	-3.04086	-1.59109	-2.40234	-2.03006	-2.77589	-6.459	2.04468	-3.36491	-3.331	-2.79551
Campylobacter concisus 13826	-12.527	-11.0705	-24.6919	-9.30885	-10.108	-12.72	-25.0883	-11.3929	-11.8181	-16.1272	-6.90997	-7.38614	-14.0435	-6.93086	-10.1234	-8.97977	-7.72513	-10.9839	-8.50644	-6.71299	-10.9782	-6.18756	-7.7342	-15.1641	-13.8551	-11.3422	-7.9053	-13.908	-6.87987	-9.88216	-8.48112	-17.7359	-17.6701	-16.9972	-18.3352	-15.6065	-15.1626	-14.9183	-17.2715	-16.6983	-17.4553	-19.6344	-17.8584	-17.1211	-16.7601	-25.0569	-15.016	-15.9897	-12.0969
Campylobacter curvus 525.92	-11.2952	-10.8415	-22.3259	-7.05788	-10.8687	-11.5083	-23.6177	-11.1634	-11.5931	-13.7563	-6.77112	-6.317	-13.7749	-7.77285	-7.82372	-4.73378	-6.42252	-7.68926	-10.1808	-8.51939	-10.6864	-6.04693	-8.50459	-11.8447	-13.5137	-9.01995	-9.72473	-11.5645	-10.6863	-8.62061	-7.29693	-19.4035	-17.3558	-16.674	-17.0315	-12.3556	-11.8833	-12.627	-14.9872	-15.4468	-16.1732	-20.3007	-16.5691	-13.84	-13.4651	-23.6794	-14.7174	-15.6961	-10.9003
Campylobacter fetus subsp. fetus 82-40	-9.29858	-6.83403	-19.7785	-6.90286	-6.8199	-12.5498	-21.6575	-11.1894	-10.6366	-12.2066	-7.16896	-3.72279	-10.654	-6.08582	-4.41778	-5.67692	-2.98638	-6.35737	-5.62016	-8.68128	-10.4368	-5.34627	-6.5143	-8.49172	-7.07447	-5.65648	-6.93398	-10.0632	-7.85969	-6.51743	-6.4965	-14.0221	-13.0158	-10.2891	-12.7351	-9.26885	-10.6771	-12.3744	-15.7592	-15.3251	-13.9981	-17.9187	-14.3574	-13.5951	-10.1432	-25.0675	-8.48076	-10.4865	-6.00002
Campylobacter hominis ATCC BAA-381	-11.1352	-9.66564	-22.5285	-8.70406	-8.64568	-10.3854	-22.3454	-12.0314	-11.4811	-10.9593	-9.06943	-5.55726	-14.4747	-7.97257	-7.17398	-6.50534	-7.73467	-8.13202	-8.34599	-8.54312	-14.2328	-5.21828	-9.35148	-12.273	-12.8433	-12.437	-8.80261	-11.815	-9.72527	-7.34006	-8.36435	-17.802	-15.7978	-14.0629	-15.5238	-12.0896	-10.4785	-14.1688	-15.5571	-14.1352	-15.8105	-18.6993	-17.163	-12.3856	-11.9186	-22.8049	-14.2846	-15.2955	-10.8446
Campylobacter jejuni RM1221	-13.8757	-8.42169	-21.6696	-8.58541	-9.43068	-12.1143	-21.7804	-11.7511	-12.1885	-13.0951	-7.51866	-6.13819	-11.2968	-6.48481	-6.25247	-5.28778	-7.8422	-8.1397	-9.55217	-7.16763	-11.1593	-6.77018	-9.08832	-11.2711	-13.902	-10.4412	-7.3944	-15.9363	-9.33705	-7.15187	-6.96143	-16.8132	-14.7894	-14.0901	-14.484	-11.8996	-16.3765	-15.0999	-18.4713	-17.9824	-15.6715	-18.7091	-17.0531	-17.323	-13.919	-23.9987	-14.1879	-15.177	-8.53177
Candidatus Blochmannia floridanus	-4.81629	-2.67957	-7.99905	-0.234673	-1.8935	-5.3422	-9.65577	-3.56066	-3.20007	-4.56709	-2.63721	-1.1873	-5.53103	-1.15968	-0.929286	-2.62212	-1.92649	-1.35309	-0.91122	-1.49806	-2.29498	-0.00565771	-2.83874	-3.18752	-4.37406	-2.60665	-0.708175	-1.87312	-0.640431	0.160431	-1.19823	-6.07943	-4.94572	-5.96797	-5.89854	-2.7636	-4.82011	-5.21526	-8.10024	-7.31759	-8.56911	-10.1684	-8.33977	-3.74739	-5.61817	-10.8251	-8.35344	-5.72024	-3.00732
Candidatus Blochmannia pennsylvanicus str. BPEN	-5.08158	-2.95281	-7.42652	-0.32146	-1.0658	-6.66459	-9.05295	-4.8788	-4.50456	-4.84016	-2.82357	-1.19107	-6.85556	-2.26247	-1.97289	-2.70809	-3.97455	-3.43733	-2.94274	-0.714843	-1.59531	-0.0272531	-4.11851	-3.48045	-4.59888	-3.80487	-0.855758	-1.05569	-0.803561	-2.02874	-1.35632	-7.4611	-6.29526	-6.30527	-7.24406	-4.05983	-6.18458	-6.59299	-8.43488	-7.65553	-8.90086	-9.54094	-8.69785	-6.11142	-4.96804	-11.2331	-8.6402	-6.99611	-2.17416
Candidatus Carsonella ruddii PV	-7.98935	-6.25545	-12.7315	-9.67427	-9.20439	-8.54483	-15.805	-7.42564	-7.58572	-12.002	-6.81244	-8.13325	-7.03921	-6.159	-11.7003	-9.94146	-12.6813	-12.8199	-12.7478	-6.57384	-9.14133	-6.89536	-6.7103	-9.13966	-10.7826	-10.4487	-6.16395	-11.2787	-6.62234	-8.53924	-5.42472	-10.5122	-8.64383	-8.29114	-8.6327	-7.63946	-9.20497	-10.2283	-12.3467	-11.2126	-8.97546	-10.7038	-8.2582	-10.1855	-10.7594	-16.8681	-11.4173	-12.8391	-7.58822
Candidatus Desulforudis audaxviator MP104C	-7.21185	-5.73492	-11.7895	-6.00351	-5.80146	-5.32015	-18.515	-8.07976	-10.4902	-12.2471	-3.31781	-0.515214	-4.858	-4.39142	-1.93267	-1.69997	-3.53613	-4.80912	-0.367432	-4.28179	-6.84324	-1.55119	-4.41133	-7.11863	-6.87686	-6.30345	-6.42943	-4.90324	-3.45412	-8.66529	0.980595	-8.74739	-3.60603	-2.95433	-4.2381	-2.34376	-7.98629	-10.7795	-13.1091	-11.4203	-8.31235	-13.6534	-8.73354	-8.93196	-6.60245	-22.1786	-2.92676	-3.88926	1.35213
Candidatus Pelagibacter ubique HTCC1062	-4.20282	-2.6177	-10.6261	-2.28751	-4.57642	-6.29388	-9.82342	-10.1779	-9.65537	-7.17497	-4.87403	-0.194719	-5.42083	-4.64588	-4.29548	-3.57682	-4.70482	-4.47829	-3.1244	-4.89767	-8.84199	-2.58672	-8.41503	-6.75147	-6.22573	-5.94879	-3.2361	-8.9151	-3.16641	-3.32314	0.200317	-6.29681	-4.24818	-3.40631	-6.04685	-4.94884	-6.10851	-6.72627	-8.15278	-10.7759	-9.66869	-9.21469	-7.92601	-5.80896	-6.12583	-14.7296	-5.07473	-8.15744	-5.883
Candidatus Protochlamydia amoebophila UWE25	-11.7179	-7.25766	-18.9953	-7.50975	-5.30348	-13.8911	-20.4805	-7.583	-7.00431	-13.4357	-8.02403	-7.43156	-11.2672	-4.06028	-5.36077	-6.18178	-7.964	-4.22106	-4.76202	-3.87205	-6.21896	-6.2967	-5.92316	-6.42855	-6.13802	-7.60895	-4.05289	-5.18865	-5.03964	-4.09895	-5.63213	-17.0132	-11.93	-13.2637	-11.586	-9.8127	-16.3925	-17.1582	-17.5054	-17.9028	-16.6905	-16.9133	-14.0992	-15.3501	-13.9994	-22.3686	-14.2655	-14.2355	-6.25505
Candidatus Ruthia magnifica str. Cm (Calyptogena magnifica)	-6.41543	-4.55457	-14.515	-1.28916	-0.759906	-6.89764	-13.1799	-6.46655	-5.98817	-7.57602	-3.08417	1.69405	-7.54106	-1.89159	-0.319128	0.655126	-2.46564	-5.37878	-3.07726	-1.51257	-3.47326	-1.78096	-3.58203	-5.31312	-2.87517	-1.79101	-2.05668	-4.20214	-2.05169	-0.696939	-2.62475	-9.83036	-8.62894	-6.64955	-9.51008	-5.81546	-7.59693	-9.1283	-9.64839	-10.1018	-10.6861	-12.8079	-8.7645	-6.86321	-7.84514	-17.3732	-12.117	-10.3231	-4.96451
Candidatus Sulcia muelleri GWSS	-7.36845	-5.53062	-12.6258	-7.69001	-7.3006	-7.8138	-15.4226	-8.28906	-8.33642	-11.3231	-6.10615	-7.13927	-8.00981	-5.21564	-10.7055	-8.9687	-11.6859	-11.833	-11.7532	-5.83785	-8.53393	-5.89873	-6.12916	-8.52678	-9.97743	-9.59751	-5.26097	-10.3544	-5.78771	-8.72566	-5.54906	-12.6387	-8.20855	-7.73405	-8.19564	-7.02657	-7.80389	-8.89205	-11.8059	-10.5226	-8.95705	-11.8328	-8.2998	-8.54842	-9.01337	-15.472	-14.0485	-14.4868	-6.65054
Candidatus Vesicomyosocius okutanii HA	-7.08853	-5.1936	-16.0304	-3.01517	-4.45693	-9.48093	-15.6611	-8.13788	-7.66614	-11.1836	-4.86866	-1.27645	-8.19928	-2.70615	-1.09716	-1.13515	-4.2203	-5.10461	-2.87446	-3.2341	-6.08519	-1.6498	-5.24632	-5.92435	-5.51778	-4.45863	-2.8166	-5.82509	-2.81642	-4.41204	-5.38271	-12.4222	-10.2062	-9.21575	-10.0954	-7.44627	-10.176	-11.6973	-12.2356	-10.6601	-11.3336	-14.4085	-11.3879	-10.3918	-9.34216	-16.8669	-11.7788	-9.99997	-4.64317
Carboxydothermus hydrogenoformans Z-2901	-6.71802	-6.12355	-14.3077	-6.25791	-10.2331	-7.50578	-24.8659	-11.6511	-11.019	-12.8397	-8.20234	-1.64124	-6.79037	-4.35445	-6.27788	-8.20069	-7.86202	-4.33334	-4.71584	-3.51206	-8.75705	-3.10137	-4.89359	-10.2748	-9.17719	-10.4422	-5.51891	-8.94268	-2.72192	-9.43414	-4.16003	-10.1685	-11.706	-11.0685	-12.258	-8.94021	-10.7902	-12.682	-13.9356	-15.8918	-14.3545	-14.114	-8.79372	-10.6049	-12.2908	-25.6818	-4.11107	-6.07429	-5.69581
Caulobacter crescentus CB15	-13.0346	-7.03599	-12.5882	-5.48482	-7.10031	-11.9722	-21.7524	-12.3348	-11.5904	-8.188	-10.5336	-4.8079	-8.36871	-5.62921	-11.3581	-5.08449	-8.89798	-8.83166	-9.69951	-10.3324	-11.719	-4.50629	-9.15763	-8.74279	-10.7602	-9.66948	-3.96724	-11.5092	-5.64569	-7.22883	-2.74164	-13.7378	-14.0818	-14.3323	-15.4874	-13.319	-14.563	-15.6629	-19.7023	-16.838	-8.17054	-10.8552	-11.5419	-13.8554	-14.4202	-20.6532	-10.1982	-15.2914	-9.89496
Caulobacter sp. K31	-12.8428	-6.31635	-10.478	-7.04117	-7.23149	-9.83321	-21.1888	-12.8309	-11.9191	-10.8641	-11.5545	-5.05754	-9.1266	-5.39174	-8.75338	-2.07784	-7.25771	-6.42199	-8.08398	-9.67438	-12.0242	-4.69501	-6.91334	-9.55148	-8.4408	-5.96217	-2.86241	-9.95944	-5.06698	-9.3797	-2.77029	-9.67027	-14.8846	-12.8697	-13.152	-10.1059	-12.7542	-12.0839	-15.837	-18.1199	-12.2301	-14.1457	-11.3712	-11.3236	-14.694	-18.8961	-9.45805	-14.9145	-6.59316
Cellvibrio japonicus Ueda107	-13.0603	-11.0555	-19.6394	-7.49451	-9.11841	-10.9861	-18.8239	-11.3672	-11.621	-11.2387	-8.54817	-7.81036	-11.4145	-4.64159	-6.36544	-9.10167	-6.9048	-5.84305	-7.70602	-9.352	-11.7519	-2.50918	-9.18265	-9.78223	-12.7996	-6.70397	-3.98149	-11.5332	-7.66657	-8.25993	-7.75768	-19.7971	-14.1205	-12.3685	-12.5242	-9.34487	-16.5939	-12.6966	-17.7327	-11.8575	-11.2197	-13.9176	-13.5892	-11.8781	-9.44065	-18.6983	-13.2506	-16.3467	-6.90591
Chlamydia muridarum Nigg	-9.86651	-8.94883	-18.7002	-6.83965	-8.25539	-10.1969	-16.3112	-7.91266	-8.44573	-8.9205	-7.72158	-5.26163	-11.9658	-5.58313	-3.96022	-6.99909	-5.06876	-4.92968	-3.75186	-7.04531	-7.82254	-4.56977	-7.01787	-7.66198	-8.27944	-8.23768	-5.65609	-6.57714	-6.65833	-5.22138	-5.22037	-13.1437	-12.919	-10.922	-11.8136	-9.19548	-12.8888	-13.4032	-13.9551	-14.3598	-13.093	-16.1361	-13.1305	-11.0715	-10.0021	-20.5234	-12.5495	-13.7809	-7.42956
Chlamydia trachomatis 434/Bu	-10.545	-7.59519	-17.2204	-6.60063	-7.9699	-7.78452	-15.8079	-7.58332	-8.12382	-8.54424	-7.50755	-5.24531	-13.6252	-5.40931	-3.78061	-6.81114	-5.86979	-3.69231	-3.59421	-5.77248	-7.44351	-3.46602	-6.6864	-8.28441	-8.94066	-8.92465	-6.42751	-6.22999	-6.4319	-4.94938	-5.98842	-14.7381	-11.5031	-10.498	-11.405	-8.83231	-13.4711	-13.9752	-13.5487	-13.9249	-13.7423	-15.7396	-13.755	-11.6077	-11.5126	-20.0265	-13.2176	-14.4638	-7.12756
Chlamydophila abortus S26/3	-10.0461	-8.14678	-16.9673	-6.98095	-6.41813	-9.42668	-16.594	-6.09495	-5.62412	-8.13312	-6.84059	-5.27334	-11.1547	-5.68245	-3.07013	-5.10874	-4.19041	-1.07047	-1.85011	-7.19799	-6.03492	-2.63395	-7.20268	-7.87409	-8.47194	-8.41609	-5.78576	-5.77717	-6.78609	-5.37541	-5.35154	-16.3691	-11.1513	-8.15954	-11.0415	-7.39832	-12.1212	-12.6412	-14.1819	-13.6027	-11.2877	-15.3565	-12.3388	-11.3306	-10.277	-18.8012	-10.735	-10.9581	-4.60204
Chlamydophila caviae GPIC	-10.6537	-8.81795	-17.8673	-7.50048	-8.9852	-10.1999	-15.561	-7.70411	-7.22117	-8.86579	-7.24047	-5.33545	-13.7889	-6.02988	-3.49691	-5.50481	-4.66183	-2.59117	-2.24303	-7.71586	-6.75711	-2.88706	-7.82625	-8.59834	-8.1405	-9.03851	-6.2343	-6.48574	-6.225	-4.90772	-4.80332	-15.1267	-10.9371	-8.96671	-12.8122	-8.08447	-14.9024	-13.441	-15.9491	-13.4231	-11.9419	-17.0981	-12.0374	-13.2064	-11.213	-18.7428	-10.3641	-11.5592	-5.20333
Chlamydophila felis Fe/C-56	-9.71872	-8.88983	-17.9633	-7.5598	-8.04729	-10.2821	-16.6654	-6.76866	-6.28451	-7.94541	-7.283	-5.345	-13.8564	-6.06805	-3.54784	-5.54948	-4.71797	-1.65095	-2.29103	-8.77136	-7.83469	-2.91759	-7.89281	-8.67643	-9.21359	-9.10679	-6.28313	-7.56437	-6.27255	-4.96567	-5.85234	-16.2075	-11.0212	-9.05337	-10.8946	-8.15785	-11.9856	-11.5261	-15.0312	-13.5106	-14.0115	-17.1772	-13.1117	-13.2999	-11.3135	-18.8437	-13.4316	-12.6237	-5.2691
Chlamydophila pneumoniae AR39	-11.4972	-9.75022	-19.1106	-8.32426	-9.81	-10.2559	-17.9317	-9.53389	-9.03638	-10.9177	-7.78868	-5.53819	-14.6605	-5.53908	-5.24134	-7.11879	-6.47992	-3.42735	-3.96498	-7.43711	-8.76841	-4.33783	-9.68761	-8.62087	-10.1121	-9.9495	-6.87886	-8.54586	-7.85046	-5.6748	-7.44848	-16.1719	-13.029	-11.0958	-13.8811	-8.03565	-13.9753	-15.5393	-16.0123	-14.5532	-15.8428	-18.1229	-13.9963	-14.4154	-13.5186	-21.0549	-14.2447	-15.4014	-7.07338
Chlorobium chlorochromatii CaD3	-6.5982	-5.14054	-17.8049	-3.38445	-3.18114	-7.78417	-17.2342	-5.46374	-5.8875	-11.242	-8.95257	-3.40417	-9.12667	-3.97924	-0.212978	-4.05523	-1.81539	-3.07298	-3.60318	-4.77239	-6.06802	-3.229	-5.80473	-6.26263	-6.96049	-5.44164	-2.9605	-5.013	-3.93946	-2.96291	-3.53755	-11.839	-10.767	-9.09661	-10.4287	-8.68353	-7.24845	-10.0078	-11.3589	-13.7749	-11.5427	-15.738	-13.948	-9.20683	-6.8498	-16.1731	-13.1087	-12.081	-4.15632
Chlorobium phaeobacteroides DSM 266	-6.80141	-5.19729	-19.4522	-6.31611	-3.30792	-11.566	-19.0611	-7.74122	-7.10622	-13.9885	-9.25084	-2.64639	-11.9044	-2.40518	-4.33533	-7.27874	-5.91794	-5.40491	-3.77047	-3.57922	-5.86339	-4.12337	-4.97539	-8.39647	-7.30604	-7.56073	-4.57622	-7.04809	-2.79204	-4.53363	-3.22102	-16.3123	-12.8242	-11.1858	-12.3714	-9.02752	-10.8899	-13.7879	-16.0361	-16.9685	-14.4754	-17.2613	-13.9146	-9.69283	-9.37744	-19.822	-16.2408	-16.2054	-4.74727
Chlorobium phaeovibrioides DSM 265	-7.46829	-5.00803	-16.0393	-5.10699	-1.00033	-8.71852	-11.9844	-5.35405	-6.79841	-9.46536	-7.27209	-2.87036	-7.84139	-2.20337	1.33199	-2.85591	-0.24392	-1.58993	-1.90083	-3.82458	-3.64892	-2.47571	-4.68328	-4.71979	-4.31606	-2.88577	-2.07	-1.32069	-2.99967	-3.70272	-3.63355	-13.2524	-11.2427	-12.5244	-10.9549	-9.45476	-7.88309	-9.58779	-9.96888	-12.5206	-13.1943	-14.1486	-13.5604	-6.8111	-8.37414	-14.3408	-10.6863	-10.6869	-6.15924
Chlorobium tepidum TLS	-7.53337	-3.04001	-18.3141	-5.30362	-3.11882	-8.58878	-17.2044	-5.40739	-6.81003	-12.7854	-6.50803	-2.55244	-13.2526	-4.60351	-2.27045	-6.03217	-1.87179	-1.17003	-3.71709	-1.54695	-5.25055	-2.69577	-4.72852	-6.5723	-7.36252	-5.75821	-4.66992	-3.35787	-3.72452	-4.03788	-2.26843	-17.2393	-12.0492	-13.4047	-12.6651	-9.68753	-9.37208	-11.1844	-12.5008	-13.748	-14.7284	-18.1508	-16.1561	-9.3021	-8.98222	-15.7086	-14.3704	-14.3297	-5.89059
Chloroflexus aurantiacus J-10-fl	0.794236	-3.1655	-8.93145	-2.54813	-3.21977	-2.06388	-3.23128	-1.55208	-1.7958	-2.52656	0.369241	-0.824688	-5.6772	-0.71087	-3.40544	-1.19725	-2.94209	-4.9056	-4.74181	-1.46272	0.061938	-1.52521	-1.3243	-0.00585048	2.97829	0.101581	-1.06133	-0.667081	0.215492	-2.43581	-0.847787	-9.13736	4.65993	1.42665	3.26651	3.50916	-1.76884	0.112395	1.09513	0.0328442	-7.50173	-10.2766	-5.86054	-0.00534919	0.445115	-2.95393	-8.55061	-9.66418	0.0329103
Chloroherpeton thalassium ATCC 35110	-4.96371	-4.33982	-16.735	-4.42609	-3.452	-2.68166	-18.4441	-6.91772	-5.27693	-15.28	-5.34511	-4.65635	-9.12888	-4.50302	-2.44243	-5.42878	-4.022	-2.54026	-2.87157	-4.70963	-5.07046	-4.16409	-3.13456	-4.63401	-2.55712	-3.79123	-2.68676	-3.25072	-5.92843	-6.72764	-3.33897	-14.5958	-7.05481	-8.41424	-9.5927	-5.19712	-7.08394	-8.99424	-12.2315	-11.1164	-11.7135	-15.5518	-12.1522	-4.86261	-6.5439	-14.0954	-13.4963	-11.4641	-2.84551
Chromobacterium violaceum ATCC 12472	-6.90618	-7.67739	-18.386	-4.77943	-4.68101	-10.4162	-22.2651	-5.47844	-5.66607	-7.93425	-6.02704	-3.90528	-8.02967	-6.02471	-7.57159	-6.61751	-7.09509	-8.16498	-5.89527	-4.98902	-10.8332	-4.59719	-8.00527	-12.0898	-13.0781	-12.8123	-4.42611	-5.26688	-6.34445	-4.2778	-3.26383	-11.9001	-13.4115	-10.5584	-13.7533	-8.18778	-9.61381	-9.81564	-10.732	-11.4769	-9.95798	-14.1502	-9.24871	-12.5948	-11.0741	-21.1969	-13.0914	-12.3137	-7.2455
Chromohalobacter salexigens DSM 3043	-3.28794	-6.45155	-12.1401	-4.17034	-6.54856	-3.54595	-0.740863	-0.42247	-0.722968	-3.7386	-6.10795	-3.74447	-3.10671	-5.25147	-5.11019	-3.54764	-3.66412	-6.45464	-7.47995	-2.75677	-6.76336	-2.41206	-4.42978	-6.60577	-5.61046	-4.65102	-4.53502	-6.76805	-4.03334	-2.32439	-8.25989	-7.11291	-7.97091	-5.28011	-6.42708	-5.56327	-5.66758	-9.69148	-7.816	-10.2519	-7.81941	-8.15322	-8.23061	-8.1747	-8.79675	-8.35446	-2.75506	-4.78079	-4.55698
Citrobacter koseri ATCC BAA-895	-3.49762	-4.08692	-0.685382	-2.94863	-5.03696	-3.68632	-2.08286	-2.31525	-2.44395	0.852131	-5.36032	1.00634	-6.30856	-3.26358	-1.68893	-2.92134	-1.2007	-2.33732	-1.01336	-3.42435	-4.58646	-0.657175	-0.579093	-0.012194	-3.94703	-2.54957	-2.70846	-1.71776	-4.80489	0.0218	-2.59068	-5.58405	-3.33613	-0.38752	-0.631638	1.23075	-6.33219	-9.61238	-9.4294	-4.88693	-2.3416	-7.96336	-5.5476	-2.06273	-3.47483	-8.26438	-5.53889	-4.89421	-0.466241
Clavibacter michiganensis subsp. michiganensis NCPPB 382	-5.84532	-8.09036	-0.315255	-8.95035	-5.1983	-7.27264	-1.60293	1.09472	-0.22796	-5.90071	-3.85417	-3.7126	-5.41329	-6.01182	-10.924	-12.1961	-15.4865	-10.1857	-10.3139	-6.41028	-3.19699	-6.34335	-3.99748	-6.9401	-6.92445	-7.03506	-6.26261	-8.28892	-5.66607	-3.78864	-6.96087	-2.22641	-0.323249	-0.656194	-4.80783	-6.1102	-8.13791	-13.121	-7.28826	-7.88629	-0.0794966	-4.23237	2.49493	-7.75083	-10.3989	-8.59348	-4.96209	-1.96121	-4.33626
Clostridium acetobutylicum ATCC 824	-10.1986	-5.1601	-7.91696	-4.54554	-5.21481	-3.06008	-16.2111	-8.5429	-8.78713	-12.5123	-3.62668	-3.82396	-8.6641	0.292518	-6.40351	-3.1926	-4.9403	-2.90258	-5.74009	-7.45726	-9.92887	-3.52443	-6.31731	-3.9948	-3.01076	-3.88886	-2.05742	-7.66055	-3.7787	-9.42713	-5.84337	-9.12037	-10.3292	-9.56324	-7.72314	-6.48364	-5.7602	-12.8782	-9.89637	-1.96178	-11.4877	-12.2586	-10.847	-3.99911	-5.5493	-9.94129	-5.53565	-6.64832	-7.9641
Clostridium beijerinckii NCIMB 8052	-4.50803	-3.09395	-2.7089	-5.95147	-3.04297	-5.69086	-13.1157	-8.33049	-8.45805	-7.1694	-2.36618	0.00456168	-6.3324	-3.26757	-2.6909	-4.92628	-5.20245	-1.34003	-2.01544	-7.43194	-6.59969	-2.65827	-7.58918	0.971538	-2.96208	-5.56222	-5.71322	-2.72527	-3.81287	-8.9904	-4.59622	-10.6156	0.647423	-1.40209	0.352751	-0.779429	-6.34488	-5.62653	-6.44168	-4.89401	-8.36746	-5.99757	-7.57168	-3.07073	-1.48159	-4.28333	-5.56576	-8.92384	-2.47007
Clostridium botulinum A str. ATCC 19397	-4.73364	-6.80425	-16.9953	-4.36596	-8.88392	-9.80559	-16.927	-8.96048	-7.23543	-9.59846	-2.36238	-0.7806	-8.84466	-3.48112	-7.26699	-5.87686	-6.81247	-5.69072	-5.61865	-6.10178	-13.3339	-4.47094	-10.8645	-3.28246	-7.29842	-3.26263	-3.79726	-7.22071	-6.40014	-8.86448	-5.55106	-14.0612	-11.6312	-10.9083	-12.0575	-9.01572	-8.20172	-10.2699	-15.3456	-11.6063	-14.6088	-13.1442	-12.9988	-10.5863	-9.17609	-13.1273	-12.5991	-12.6612	-5.76355
Clostridium difficile 630	-6.05876	-7.0544	-8.63641	-5.49395	-11.1174	-4.98528	-15.8197	-8.36528	-7.61924	-11.2357	-3.54731	-4.81022	-7.41184	-6.64086	-7.36501	-7.10067	-6.90441	-5.84238	-7.70564	-8.35085	-17.75	-4.50901	-12.1812	-7.77992	-12.7973	-9.70195	-6.98065	-14.5318	-6.66535	-12.2581	-5.75674	-9.79363	-9.11823	-10.3663	-11.5221	-6.34336	-7.59208	-8.69464	-9.73091	-7.85636	-10.2168	-12.914	-8.58646	-6.87673	-8.43946	-11.6956	-10.2475	-9.34342	-7.90527
Clostridium kluyveri DSM 555	-9.29061	-9.22905	-20.1033	-8.57843	-8.27799	-9.1085	-27.4712	-16.661	-15.8986	-18.6952	-7.67888	-4.83338	-11.8331	-8.75063	-5.42777	-7.25168	-5.96285	-2.94063	-4.76193	-5.52707	-10.0466	-6.53432	-13.4069	-6.13652	-9.15088	-10.0111	-9.10726	-8.74369	-8.85305	-12.5383	-6.89977	-17.3396	-10.4686	-11.6928	-13.8559	-9.57577	-10.8709	-11.9992	-16.0052	-13.0305	-16.6692	-20.4903	-16.0213	-10.0788	-8.62048	-23.1034	-10.7285	-9.85304	-6.00218
Clostridium novyi NT	-4.77635	-2.26756	-7.71484	-1.51889	-4.35474	-7.78619	-15.7343	-6.65751	-6.05385	-3.19757	-3.65126	-1.57507	-5.55671	-0.761696	-3.50727	-2.27968	-3.10609	1.56953	-2.95821	-4.74648	-4.55884	-0.794564	-5.96793	0.0824847	-5.73175	-4.10291	-0.849009	-1.69515	-2.92906	-7.32139	-0.454808	-7.61926	-3.38586	-3.74539	-2.98918	-0.946278	-6.66333	-9.49074	-8.79623	-7.99077	-6.04929	-7.53585	-4.48112	-4.57723	-3.26237	-15.1106	-6.71319	-7.67121	-1.06716
Clostridium perfringens ATCC 13124	-5.38371	-10.7024	-6.47819	-8.69087	-5.81537	-5.971	-12.4556	-8.38175	-7.7247	-8.04409	-3.58824	-2.68237	-9.72622	-4.75037	-7.69194	-5.80483	-8.26343	-3.86647	-5.10325	-8.0451	-9.60681	-5.2576	-9.54599	-6.25291	-6.20812	-7.38593	-5.96642	-8.75882	-6.28065	-11.2318	-6.63937	-9.35234	-2.6557	-4.00572	-2.16872	-4.63385	-10.586	-8.52966	-10.7359	-7.49013	-6.34807	-8.32943	-4.78278	-8.29298	-8.96163	-4.80632	-8.17729	-7.15688	-7.08815
Clostridium phytofermentans ISDg	-5.27524	-8.21757	-4.07205	-6.57299	-6.26749	-6.10046	-13.4276	-8.64122	-7.87994	-7.6646	-0.670161	-4.83179	-10.8047	-5.74346	-8.42378	-4.24189	-4.95914	-7.93436	-5.75832	-7.51542	-9.02694	-3.53268	-7.39191	-6.11283	-9.1275	-6.99076	-5.09897	-10.7299	-8.84064	-12.5197	-6.89038	-7.30272	-7.44526	-7.67116	-8.83371	-4.56039	-4.85243	-6.979	-3.98703	-6.01904	-8.63868	-8.4513	-8.992	-7.06554	-8.60865	-4.0763	-9.69614	-11.8186	-7.99585
Clostridium tetani E88	-9.15898	-8.62043	-18.3541	-6.83744	-10.7189	-10.0873	-22.5849	-10.0563	-9.44189	-11.8562	-7.87594	-6.60471	-10.0467	-3.0067	-8.84815	-3.66199	-6.44176	-3.81812	-5.29877	-7.05908	-12.0451	-2.93302	-11.3445	-10.4653	-9.31661	-8.64686	-5.12605	-11.2141	-6.25132	-7.771	-2.74483	-16.2331	-13.9192	-15.2825	-16.5022	-12.3519	-15.1215	-14.9739	-15.2602	-15.3646	-11.5671	-17.1596	-13.0037	-14.0023	-13.6914	-21.7464	-16.2672	-15.2252	-8.33323
Clostridium thermocellum ATCC 27405	-8.07427	-11.2785	-13.7391	-7.06751	-10.3816	-5.41595	-18.1868	-9.17082	-8.48239	-13.3321	-4.98559	-2.72866	-9.76743	-4.13719	-4.02443	-4.38091	-0.582476	-4.32924	-1.40374	-4.58998	-12.4899	-2.38035	-8.22117	-8.28362	-10.2795	-8.35461	-4.40498	-13.5404	-6.85638	-13.0656	-4.11672	-10.6786	-8.65731	-8.97892	-8.12733	-3.34502	-9.41182	-7.41566	-7.56147	-8.07715	-10.4572	-10.7014	-9.87605	-9.97196	-11.6073	-11.9863	-12.367	-12.3788	-2.45246
Colwellia psychrerythraea 34H	-15.4107	-13.0281	-20.49	-8.92482	-10.9865	-14.6481	-21.8098	-12.1888	-11.3269	-15.9684	-9.31142	-5.97918	-17.1115	-7.23001	-8.67246	-8.87958	-7.18602	-10.3143	-7.99603	-8.36095	-16.476	-4.64811	-14.4949	-17.8765	-14.8211	-12.4436	-7.66847	-12.6545	-9.73809	-6.87618	-6.54415	-21.3235	-18.1991	-19.2659	-16.5016	-11.6842	-18.2263	-16.4945	-20.3269	-14.8277	-20.128	-25.6813	-19.3484	-13.9957	-14.418	-26.1064	-18.3167	-16.6495	-11.4343
Corynebacterium diphtheriae NCTC 13129	-8.62839	-10.1293	-13.4704	-7.389	-7.2115	-11.6666	-12.4107	-9.50493	-8.90515	-6.94602	-6.5641	-4.56175	-9.37092	-7.6656	-10.365	-8.12936	-13.9654	-12.2732	-11.8137	-5.62507	-5.37107	-4.73545	-4.82217	-8.70706	-9.5067	-7.89292	-4.74024	-7.49045	-4.80449	-5.14856	-4.34151	-15.387	-10.1807	-9.53788	-8.79167	-9.78882	-12.486	-14.3042	-14.6164	-12.8434	-6.85318	-13.3004	-9.28262	-12.4102	-10.0925	-15.8656	-12.5037	-12.4624	-5.96035
Corynebacterium efficiens YS-314	-6.53042	-8.82695	-14.7418	-7.77682	-7.93898	-9.06872	-11.8161	-4.54651	-3.88331	-8.31443	-4.6729	-6.69172	-9.9409	-8.83468	-11.7702	-10.9318	-11.3389	-12.9723	-8.17483	-10.1616	-9.79431	-5.28663	-7.68955	-6.47052	-10.4358	-9.59284	-8.06185	-10.9306	-6.40337	-4.40848	-5.74256	-10.625	-8.86702	-7.21241	-8.37113	-7.78566	-10.7614	-11.7172	-12.9117	-11.6177	-7.57643	-8.61058	-8.00883	-15.4402	-13.1031	-17.0558	-11.4224	-10.4074	-8.16907
Corynebacterium glutamicum R	-5.84746	-9.09214	-11.3192	-7.95148	-6.20004	-6.274	-10.6084	-4.90775	-4.23033	-8.90473	-4.8554	-4.71274	-5.41656	-7.01301	-10.925	-9.19782	-10.4874	-13.1871	-9.31479	-10.412	-8.19973	-4.34372	-5.99958	-8.94331	-11.9278	-9.03806	-6.26396	-10.2913	-6.66786	-4.79123	-6.96234	-7.23059	-9.32637	-7.65922	-8.81081	-7.11241	-6.14047	-10.1238	-12.2908	-10.8881	-6.08299	-3.2367	-3.50851	-13.7529	-13.4009	-9.59715	-8.96583	-8.96506	-8.33737
Corynebacterium jeikeium K411	-9.07103	-8.5999	-17.5618	-6.86671	-8.66072	-11.1998	-19.2171	-8.93738	-8.35103	-11.0139	-9.23426	-6.49531	-10.6878	-8.29763	-10.7761	-9.55308	-13.3799	-9.64547	-12.2032	-9.16527	-8.66509	-5.48271	-7.27228	-9.92106	-10.6653	-9.1049	-7.32293	-10.7014	-6.33583	-3.50308	-8.90955	-13.5356	-12.4127	-11.7573	-13.0517	-10.1927	-13.8172	-15.6023	-13.9373	-16.2745	-10.133	-12.4396	-6.55095	-12.7677	-15.4329	-17.9472	-14.7358	-9.70017	-7.53833
Coxiella burnetii RSA 493	-7.92207	-2.46843	-11.7418	-4.63873	-5.4794	-10.1586	-17.8721	-8.79653	-9.23313	-12.1675	-6.54665	-5.16213	-5.34923	-2.51677	-5.31731	-3.33708	-4.90829	-6.20139	-7.62397	-5.20661	-8.21746	-3.80215	-5.13439	-3.33428	-3.96921	-4.5049	-3.43113	-7.00614	-3.37559	-6.2034	-4.99865	-7.8778	-9.8519	-9.15461	-10.5444	-5.95017	-11.4326	-15.1582	-12.5284	-16.0343	-4.72646	-10.7738	-6.10972	-12.3807	-11.9801	-18.0739	-2.24581	-5.23368	-4.57329
Cytophaga hutchinsonii ATCC 33406	-13.1066	-13.0907	-19.732	-10.5118	-3.15088	-10.011	-22.953	-12.4258	-11.6765	-14.3302	-9.57447	-5.81485	-13.4975	-7.66379	-7.37841	-5.13241	-6.91691	-6.8633	-5.7176	-9.38729	-6.81117	-5.51434	-4.22775	-9.85335	-6.87036	-5.76603	-7.00706	-7.57614	-7.70417	-9.31594	-5.7865	-14.9046	-13.1903	-11.4337	-13.5908	-11.3914	-13.6496	-12.7574	-17.7875	-14.8926	-15.3088	-17.0309	-13.675	-8.91876	-8.47726	-22.7796	-9.3454	-12.4469	-5.92553
Dechloromonas aromatica RCB	-9.62933	-5.47853	-24.8009	-6.69283	-4.50395	-7.28126	-21.4464	-10.1046	-9.31602	-10.3737	-7.87064	-5.87085	-14.4764	-3.9046	-2.51047	-1.45929	-1.03922	-4.0703	-6.83758	-1.78235	-7.47963	-2.56941	-7.73627	-5.65999	-9.66345	-6.4558	-4.28583	-7.03859	-4.12479	-1.94616	-4.10299	-16.1767	-14.985	-13.1693	-14.3476	-11.9134	-9.27919	-12.447	-12.4053	-14.2788	-17.3614	-22.3784	-18.6826	-11.3664	-11.8749	-20.703	-18.462	-16.636	-8.1383
Dehalococcoides ethenogenes 195	-2.56192	0.931658	-9.6578	-0.993015	-5.03169	-3.79243	-17.269	-8.4792	-7.93758	-11.1069	-2.71837	0.224617	-3.85389	0.424613	-3.30527	-4.91112	-3.83147	-5.33509	-4.36632	-2.05695	-5.51933	0.252081	-3.77913	-10.5126	-10.0439	-8.67714	-1.33927	-7.9443	0.743469	-5.72594	1.10029	-8.04169	-8.03618	-7.27091	-6.78522	-3.45822	-10.7798	-12.4467	-11.8465	-9.4565	-10.1618	-11.9428	-9.48877	-10.6397	-12.1151	-14.8868	-7.60916	-3.63944	0.715838
Dehalococcoides sp. BAV1	-2.31254	2.26366	-7.78879	-0.423241	-2.69309	-2.4194	-16.0158	-6.28287	-6.75885	-8.32642	-2.94285	2.61106	-0.53503	1.2802	-2.44943	-3.67961	-2.86952	-3.62338	-3.29315	-1.99151	-4.97662	1.3214	-3.52555	-6.89153	-8.36827	-7.08415	0.675078	-7.07559	0.746823	-4.43352	2.11194	-6.43535	-7.39175	-5.55612	-7.18666	-3.07127	-6.24429	-10.8657	-10.29	-7.91493	-6.78745	-10.3515	-7.05085	-9.95966	-9.29014	-13.9028	-4.19564	-2.27385	1.00123
Deinococcus geothermalis DSM 11300	-4.7913	-4.04555	-5.21612	-3.92162	-5.15441	-2.23822	0.533358	-3.84322	-4.16841	-2.79955	-3.82312	-4.70893	-3.33108	-1.98181	-3.89897	-5.15154	-6.46251	-4.15042	-3.29138	-0.367744	-1.12789	-2.33413	-7.94468	-4.85931	-2.84063	-4.95941	-2.22857	-6.22847	-3.62108	-4.72336	-2.92374	-0.121609	-1.24472	-3.58006	-0.732694	-3.05466	-3.0733	-1.05165	-2.22372	-2.84072	-2.99189	-5.12385	-4.41883	-3.69808	-3.34894	-3.50103	-2.86813	-3.86456	-1.3082
Deinococcus radiodurans R1	-6.02959	-7.24203	-14.6559	-6.04522	-7.34617	-5.38831	-16.072	-7.11867	-6.43247	-8.24758	-1.95996	-4.72546	-8.69756	-2.11295	-8.00555	-5.34533	-7.56446	-4.30198	-4.3869	-7.55498	-8.43274	-1.37339	-9.17753	-6.21644	-6.21026	-7.29239	-1.37743	-8.49192	-3.81929	-6.01153	-3.0865	-10.5893	-8.59195	-6.91593	-9.06484	-4.29927	-6.35835	-5.35808	-8.50819	-10.0402	-8.38262	-11.6087	-11.8029	-7.92911	-5.56711	-17.9095	-10.2871	-9.29628	-4.43013
Delftia acidovorans SPH-1	-7.24545	-2.57544	-20.438	-5.14812	-4.4477	-8.99569	-20.5218	-8.46132	-8.49541	-13.7039	-5.78092	-5.14789	-8.16079	-3.53095	-2.82987	-6.24236	-7.32465	-6.50951	-4.17388	-4.96234	-7.53245	-3.74482	-7.30256	-12.1791	-12.0012	-13.4246	-6.0323	-6.22424	-3.36537	-3.83861	-2.96896	-10.0539	-8.53299	-10.43	-10.7663	-8.4968	-13.2498	-13.6411	-17.3143	-12.3887	-12.3573	-17.667	-13.4043	-10.6173	-9.93786	-19.6424	-7.61082	-8.21346	-4.74411
Desulfatibacillum alkenivorans AK-01	-2.70022	-0.222438	-20.1474	-1.00325	-3.15226	-9.77345	-27.728	-8.61529	-8.72083	-15.5677	-6.4743	-2.02985	-8.78164	-1.33981	2.27315	-0.0150049	0.765675	-0.388252	-1.05434	-4.57148	-5.84363	2.32103	-3.77536	-6.32879	-8.23824	-4.79348	-1.79979	-5.86141	-2.95939	-5.21467	-0.697136	-16.2113	-14.6573	-10.6707	-11.9364	-9.96709	-5.57962	-8.88853	-9.66853	-14.0241	-13.8551	-18.6449	-12.0246	-7.2169	-6.60471	-23.6343	-14.0712	-15.4834	-4.54068
Desulfitobacterium hafniense Y51	-5.54239	-5.11708	-15.7867	-6.9608	-8.06272	-4.7058	-24.2244	-6.38092	-8.50465	-13.2405	-2.38551	-4.00136	-4.41143	-4.28067	-6.69736	-5.94249	-8.20819	-5.34889	-3.02233	-5.45695	-6.64333	-3.66191	-10.6225	-5.08215	-11.0117	-6.60388	-5.72888	-10.75	-8.83918	-9.03063	-4.61445	-14.7202	-9.4069	-13.4501	-8.6988	-7.81302	-12.3868	-8.67325	-11.4822	-9.91736	-15.4532	-15.1111	-14.6515	-12.0971	-10.5038	-24.3459	-9.65479	-12.0221	-6.4827
Desulfococcus oleovorans Hxd3	-9.22458	-5.4005	-20.0206	-5.14049	-1.49946	-11.5078	-26.5756	-13.3474	-12.6513	-16.6177	-9.07169	-4.73969	-11.0052	-2.21786	-0.0855202	-2.49879	-0.64067	-2.4183	-2.45807	-4.7074	-10.6823	-2.40292	-4.36793	-5.51008	-6.51238	-3.56331	-3.49674	-6.70125	-4.98093	-8.24763	-2.21767	-16.9828	-12.8777	-11.1908	-11.338	-9.49863	-11.5917	-11.6096	-14.7406	-15.2004	-13.711	-19.0178	-14.1246	-12.1149	-10.7411	-20.2451	-15.6389	-14.6603	-4.52637
Desulfotalea psychrophila LSv54	-11.164	-9.35151	-20.9069	-6.11145	-6.45221	-6.47099	-24.4184	-10.2761	-9.58306	-14.5024	-8.03702	-3.7352	-12.9089	-4.18551	-7.06135	-5.45163	-6.61766	-2.3829	-5.4366	-3.66014	-10.6048	-1.39398	-10.3088	-7.41875	-8.41859	-6.47933	-7.45993	-11.6368	-6.93078	-7.17428	-7.17713	-20.8595	-14.7888	-14.1054	-16.253	-11.4368	-11.5192	-15.5314	-13.6684	-15.1509	-15.6081	-20.8895	-17.024	-13.0575	-12.6875	-21.1408	-17.5288	-16.5462	-8.49681
Desulfotomaculum reducens MI-1	-7.24582	-5.41764	-18.0606	-4.15056	-4.51597	-4.52061	-21.6309	-11.3726	-12.6753	-8.65818	-7.08385	-1.74129	-8.03913	-3.22916	-7.09386	-2.51523	-2.6486	-2.43056	-0.46547	-3.72396	-8.70946	-3.40601	-8.38867	-4.54215	-5.54527	-4.59274	-1.5096	-6.72372	-5.99851	-8.27337	-4.23185	-15.0263	-6.90895	-5.22074	-7.36787	-4.52031	-11.6172	-12.637	-16.7659	-11.2177	-8.74722	-14.063	-12.1601	-9.13501	-6.75981	-20.2818	-11.6778	-10.7006	-3.53666
Desulfovibrio desulfuricans G20	-10.0917	-4.07942	-19.7023	-4.50629	1.85952	-10.003	-12.9115	-9.40695	-9.65866	-8.30078	-9.56603	-4.8134	-13.4708	-2.65668	-7.37427	2.87743	-5.91305	-3.85684	-2.71391	-1.37597	-2.79215	-5.51269	-3.21328	0.169479	-0.847649	3.25387	-1.99887	-1.56238	-6.69211	-5.29797	-6.77726	-19.87	-13.1679	-9.41275	-11.5694	-8.37646	-9.63169	-9.73786	-8.76992	-16.8813	-16.2801	-18.9944	-13.6474	-10.9057	-10.4655	-20.7535	-17.3149	-17.4146	-5.91924
Desulfovibrio vulgaris subsp. vulgaris DP4	-2.87098	-4.11159	-17.3625	-1.96385	0.780931	-4.28891	-13.6679	-1.93484	-2.25631	-2.94885	-4.86891	-1.71436	-6.45252	-1.02602	-0.935734	4.78291	-2.49772	-2.20227	-1.32443	-0.430471	-2.22981	-1.34767	-2.02256	1.02148	-0.964265	-1.07096	-1.27872	-1.31749	-1.68744	-4.81967	-1.97846	-15.2764	-7.36059	-4.69236	-7.84355	-6.13657	-6.1686	-6.15401	-10.3189	-12.9079	-15.1213	-15.2842	-12.5462	-6.77581	-6.42258	-18.6374	-14.0069	-15.0074	-2.34951
Dichelobacter nodosus VCS1703A	-8.71017	-5.08232	-14.8973	-6.68863	-5.05601	-11.7213	-13.9697	-4.7058	-5.19018	-9.50446	-7.56358	-2.45648	-10.9102	-3.31742	-5.63261	-5.12783	-6.99234	-5.84342	-4.40684	-4.476	-8.23927	-3.18717	-2.91793	-8.12716	-7.59531	-6.35069	-2.83886	-4.20478	-4.7798	-1.8339	-4.40455	-13.6784	-12.605	-11.7353	-12.42	-9.39803	-10.4968	-11.0984	-12.536	-12.1449	-14.1381	-14.6046	-13.3673	-11.1268	-11.3818	-13.9537	-11.5372	-11.6406	-8.36026
Dictyoglomus thermophilum H-6-12	2.78837	4.24162	11.8055	4.03443	-0.781947	9.56904	1.55059	-3.08097	-2.51229	2.3765	3.27906	-3.28751	1.32111	-1.71566	-3.71276	-2.64495	-5.31014	-3.58136	-2.05947	-1.44945	1.41876	2.00595	-0.421732	-2.72997	-1.3912	-2.90416	-1.65927	0.560015	-0.616576	-3.52674	-3.2303	-0.284815	3.75733	5.44239	6.07776	2.73503	7.21759	5.47799	7.11548	6.64481	1.92765	1.81844	2.53442	7.26212	6.64243	10.4564	-3.61082	-0.591476	0.171876
Dictyoglomus turgidum DSM 6724	5.57625	3.03754	15.0292	2.94633	0.0469685	11.3255	5.10167	-2.31081	-1.7559	1.60276	2.75495	-1.83391	1.20792	0.827471	-1.60267	-0.808867	-2.17675	-1.52906	1.17238	-0.786997	0.406777	3.5579	0.361053	2.34016	-0.252511	0.174528	1.96566	0.746843	0.0370977	-5.65399	-0.597606	4.80822	5.81692	9.53738	6.10286	4.59399	7.17095	6.46821	7.08612	8.53056	-0.142666	4.91197	2.49297	6.24543	6.68625	11.731	1.36779	0.365883	3.88232
Dinoroseobacter shibae DFL 12	-10.649	-10.4928	-14.8421	-5.69919	-13.5168	-10.2911	-12.504	-10.1309	-9.34066	-10.4134	-5.88179	-6.87318	-12.5149	-5.91333	-9.515	-6.4709	-10.0434	-10.0774	-6.84179	-10.7971	-14.5048	-2.57141	-6.75543	-14.6905	-10.6931	-9.4814	-6.29599	-15.0552	-6.14051	-5.96982	-4.11459	-12.227	-12.0153	-13.197	-13.3764	-10.933	-13.303	-16.4732	-14.4286	-12.2931	-12.4029	-17.4319	-15.7221	-14.3829	-16.8893	-15.7381	-14.5059	-15.6831	-9.14604
Ehrlichia canis str. Jake	-9.98647	-6.08103	-17.8787	-5.93342	-7.36384	-9.35043	-19.5	-8.03455	-7.56499	-12.0623	-6.80112	-2.26921	-11.0921	-4.6493	-6.03285	-3.07196	-7.14916	-6.02306	-6.81664	-7.14727	-10.9644	-2.61212	-7.14134	-6.80357	-7.40777	-6.35657	-4.74255	-10.7103	-4.74357	-4.3241	-1.30787	-15.2943	-12.0742	-12.0806	-11.9659	-7.33097	-12.0441	-13.5622	-14.1066	-13.522	-13.2231	-16.2834	-11.2698	-11.2445	-10.1857	-18.7089	-13.6734	-13.8992	-4.54448
Ehrlichia chaffeensis str. Arkansas	-11.4438	-7.69119	-20.0319	-7.26868	-8.75655	-11.1897	-21.8437	-9.48174	-8.98509	-13.8498	-7.75416	-2.51868	-12.6055	-5.50594	-8.18867	-4.07768	-8.42223	-7.37051	-7.91258	-8.39134	-12.704	-3.30572	-8.63315	-8.55545	-9.04904	-7.89016	-5.83734	-12.4762	-5.81028	-5.62521	-2.40703	-17.1057	-13.9597	-13.0239	-13.8133	-9.97542	-13.9076	-16.4701	-16.945	-15.482	-14.7858	-19.0579	-12.9357	-13.3391	-12.4358	-21.9715	-15.1885	-15.3477	-7.01732
Ehrlichia ruminantium str. Gardel	-10.1983	-6.31476	-18.1933	-6.10512	-7.55787	-9.62111	-20.8348	-8.24864	-7.77461	-12.3147	-6.94118	-2.28519	-11.3143	-4.76787	-7.16894	-3.20433	-7.29969	-7.19447	-6.93951	-6.32756	-12.2153	-2.69204	-7.35916	-8.05459	-7.63695	-6.56932	-4.89675	-11.9501	-4.8951	-5.50717	-2.4636	-13.5595	-12.3482	-10.3613	-12.2347	-9.57027	-11.3176	-14.8423	-14.3742	-13.8085	-13.4522	-16.5428	-12.5147	-11.5502	-10.5108	-19.0368	-13.8923	-14.1084	-5.75022
Enterobacter sakazakii ATCC BAA-894	-6.92061	-5.68763	-2.41687	-5.78379	-4.69005	-7.42308	0.691726	-2.49821	-2.68455	-1.96361	-6.03519	-2.90718	-0.0592435	-2.03082	-3.57464	-6.62547	-7.09787	-4.16966	-5.89821	-5.99975	-3.85158	-2.59863	-4.01928	-4.11226	-4.09957	-3.83071	-2.43328	-2.27847	-4.35584	-1.29503	-4.27208	-5.93881	-8.43382	-6.57864	-7.77452	-6.20204	-11.6313	-7.83493	-6.74897	-9.48709	-1.9899	-3.19162	-1.2789	-8.60655	-9.08433	-7.22275	-5.12499	-3.35003	-7.251
Enterobacter sp. 638	-3.7133	-2.53933	-5.97692	-3.71971	-1.55838	-6.32278	-1.69259	-2.21692	-1.42132	-3.54314	-5.91811	-1.8809	-1.64146	-3.94159	-1.52956	-3.50837	-5.05673	-2.10005	-1.85539	-5.84523	-2.58691	-1.57789	-1.81789	-4.7902	-1.78967	-1.56464	-3.32893	-1.10904	-0.191672	0.953053	-1.15229	-1.39222	-6.11397	-3.28739	-6.47033	-4.99679	-6.3806	-6.55855	-8.50442	-7.33937	-3.53926	-4.60789	0.14824	-5.43634	-4.93614	-6.85249	-0.649981	-2.8378	-4.17117
Enterococcus faecalis V583	-4.22458	-8.4005	-14.0206	-7.14049	-4.49946	-3.50777	-12.5756	-4.34744	-3.6513	-4.61767	-6.07169	-3.73969	-11.0052	-5.21786	-10.0855	-10.4988	-11.6407	-9.4183	-9.45807	-6.7074	-7.68226	-6.40292	-7.36793	-13.5101	-11.5124	-12.5633	-3.49674	-7.70125	-5.98093	-9.24763	-5.21767	-13.9828	-9.87772	-11.1908	-10.338	-8.49863	-9.59172	-10.6096	-10.7406	-7.20043	-9.71095	-15.0178	-10.1246	-5.11494	-9.7411	-8.24514	-12.6389	-13.6603	-9.52637
Erwinia carotovora subsp. atroseptica SCRI1043	-3.97753	-6.7279	-4.53905	-3.80087	-2.72554	-4.45008	-3.47929	-4.57652	-4.75766	-3.07954	-4.0673	-1.91479	-6.17662	-4.05481	-4.58656	-6.65661	-5.1087	-3.18784	-1.90974	-3.04199	-7.92419	-1.6043	-8.07455	-6.20082	-9.1842	-7.90308	-3.46142	-5.32389	-6.40067	-3.36293	-2.30449	-8.0927	-6.52202	-6.65855	-7.85837	-7.25825	-7.7002	-2.91106	-10.8161	-7.52724	-7.11663	-7.35639	-6.39865	-7.65269	-8.12426	-10.3248	-5.25827	-8.49434	-5.27263
Erythrobacter litoralis HTCC2594	-13.6966	-11.9666	-24.0431	-9.87022	-11.0769	-14.1773	-21.229	-13.7349	-13.0644	-18.6228	-9.76863	-5.70258	-14.1881	-6.92882	-10.8537	-9.07266	-12.4191	-11.0873	-9.25059	-11.293	-14.0068	-5.31746	-11.8521	-10.7179	-6.69366	-8.82656	-6.1685	-16.1215	-6.54213	-8.60896	-6.85832	-18.9395	-16.1073	-14.4466	-15.6012	-13.9571	-17.96	-17.9301	-19.1105	-18.7603	-18.8396	-25.9355	-19.2688	-15.6051	-17.2605	-27.3392	-17.7048	-18.6968	-10.2584
Escherichia coli K12	-3.57312	-6.4376	-2.68381	-1.67453	-3.46717	-4.25318	0.717432	-1.03003	-1.24596	3.7395	-2.83886	-0.864302	-1.36719	-1.87959	0.502592	-2.42591	-1.02721	-1.04987	-1.82547	-2.74017	-1.40781	0.436299	-0.681638	-1.57294	-4.57877	-0.382639	-2.25673	-1.99086	-2.07992	-0.878619	-2.06975	-5.03435	-5.89895	-3.0903	-4.26572	0.142459	-9.21137	-9.37246	-7.33897	-4.23811	-3.24378	-3.22697	-1.57058	-4.31933	-5.83348	-4.60321	-1.33767	-0.502725	-4.11612
Exiguobacterium sibiricum 255-15	-8.7055	-4.97406	-8.05933	-5.87511	-5.08418	-2.18308	-4.25129	0.254907	-0.0742014	-3.63938	-1.77376	-3.70317	-5.20153	-3.93383	-4.85807	-3.08012	-7.42328	-6.09327	-6.2545	-5.30007	-4.01816	-3.31906	-0.860799	-2.73119	-1.70748	-0.839062	-4.17417	-8.13158	-3.54956	-2.61972	-3.86449	-11.9566	-5.12023	-2.45913	-3.61355	-3.96633	-7.9707	-6.94155	-3.12116	-5.7679	-3.85388	-8.95309	-8.28281	-2.61384	-2.26889	-3.35438	-5.72008	-6.71247	-6.2631
Fervidobacterium nodosum Rt17-B1	1.54652	-1.99287	-5.01647	0.910725	-5.9846	1.29611	-7.95573	-6.33967	-5.78427	-5.44268	-1.2631	-1.85841	-0.824975	-3.19311	-2.6463	-3.84025	-3.22161	-3.56969	-1.87651	-2.81208	-5.63039	0.535438	-6.66853	-6.69984	-5.29491	-2.8657	-4.05814	-3.29823	-2.98744	-4.6865	-3.6216	-5.23222	2.77715	3.49617	2.06434	-0.438546	-3.86511	4.43084	3.04941	6.49643	-6.17711	-6.12841	-3.54266	1.20769	2.64593	2.68311	-3.66832	-2.66934	0.854566
Flavobacterium johnsoniae UW101	-13.5054	-7.09219	-18.703	-9.95076	-9.04147	-9.68973	-25.1075	-13.3267	-12.4545	-13.164	-13.3647	-5.99499	-13.3264	-4.26657	-10.6904	-10.9251	-8.20201	-6.33935	-9.01492	-10.43	-15.5964	-6.658	-10.5867	-14.0244	-12.9583	-10.5591	-6.71204	-11.7234	-9.81088	-8.98736	-5.59484	-20.6077	-16.3485	-14.3985	-19.6434	-12.7769	-12.3417	-11.623	-16.4386	-14.8922	-18.361	-17.989	-16.5657	-9.06873	-10.4799	-23.2786	-12.559	-14.9164	-12.4691
Flavobacterium psychrophilum JIP02/86	-12.0956	-7.56242	-22.2474	-6.78638	-7.65916	-12.0382	-24.4425	-8.98975	-10.3772	-13.7462	-7.83878	-5.60017	-14.9645	-3.96646	-6.79434	-5.59932	-7.3889	-4.75581	-7.24555	-6.00741	-13.9644	-4.91146	-9.2821	-8.37416	-10.2194	-8.55665	-5.08057	-10.1292	-7.19791	-7.69623	-3.69708	-16.13	-17.8305	-17.1935	-16.4169	-15.2848	-16.0456	-14.8938	-21.1834	-18.3033	-14.4802	-18.0547	-16.9161	-13.9325	-10.6213	-26.6408	-11.1741	-12.1319	-10.2901
Francisella philomiragia subsp. philomiragia ATCC 25017	-8.22489	0.228411	-11.2153	-3.98029	-3.79574	-9.44328	-15.4761	-9.09405	-8.52512	-9.64454	-7.72891	-3.29237	-2.69411	-3.72475	-4.73047	-0.659055	-6.32809	-4.59855	-4.07887	-2.46055	-4.59792	-2.00252	-2.43489	0.251833	1.58938	-0.922526	-0.669675	-2.45978	-3.62764	-4.54162	-3.24089	-5.30362	-7.26062	-6.57609	-7.93958	-7.27936	-7.79842	-7.53868	-9.90082	-10.3698	-7.08833	-9.20043	-4.48199	-6.75412	-6.37469	-18.5651	-8.6277	-5.60805	-2.83962
Francisella tularensis subsp. holarctica	-7.47322	-4.01307	-15.0469	-4.11288	-5.00556	-7.72339	-18.9939	-7.35884	-6.80312	-13.4729	-7.27509	-4.8743	-3.84686	-3.20678	-4.67523	-1.86112	-4.25134	-4.59666	-2.90891	-5.82874	-6.65509	-2.47942	-5.68819	-3.72643	-2.3231	-4.89246	-5.07394	-6.32817	-3.00375	-4.70812	-3.63753	-4.25913	-6.24928	-7.53122	-6.96125	-7.46016	-6.88907	-9.594	-7.97497	-9.52622	-10.2	-10.1553	-6.56636	-6.81735	-7.38082	-16.3487	-8.69235	-7.69278	-5.16383
Frankia alni ACN14a	-12.6118	-14.8038	-22.3459	-8.24933	-6.63639	-10.1366	-25.7726	-11.0642	-11.0417	-15.4677	-10.9872	-7.24984	-17.1875	-4.64839	-11.9055	-11.3768	-15.3905	-14.582	-11.2685	-11.2209	-8.99156	-6.79856	-9.6557	-11.7456	-11.4935	-13.8257	-7.17842	-11.4526	-7.62875	-10.2444	-7.13925	-22.4393	-16.1303	-12.9371	-13.3318	-9.85135	-18.7045	-17.1553	-16.7519	-14.634	-16.4809	-23.2081	-20.4208	-15.8757	-17.1509	-23.3314	-20.7434	-21.5116	-9.88926
Frankia sp. CcI3	-10.0066	-11.7484	-17.6017	-7.80951	-6.74355	-11.4638	-23.5669	-6.61667	-6.79513	-13.1388	-8.08369	-4.91874	-12.237	-6.06696	-9.59258	-8.67234	-13.1142	-12.197	-10.9156	-9.06352	-3.96125	-4.6072	-7.10276	-7.24605	-7.22732	-10.9399	-6.4757	-6.34689	-6.42351	-8.39756	-6.32095	-19.1719	-15.5671	-12.6993	-15.9012	-12.2869	-14.7354	-12.95	-16.8504	-12.5477	-13.1818	-14.4413	-13.4602	-17.6762	-18.1445	-23.3769	-18.3268	-16.5686	-9.28363
Frankia sp. EAN1pec	-7.83399	-13.9392	-11.9125	-12.3151	-10.7483	-11.2198	-17.5464	-10.4439	-9.38326	-13.9284	-8.11268	-2.32357	-12.8542	-5.71568	-8.95667	-10.4523	-12.435	-10.6244	-8.33487	-9.37625	-10.2679	-5.83671	-8.86918	-12.0851	-10.7824	-11.0589	-7.26357	-13.5872	-6.78415	-8.48356	-7.23762	-17.3455	-8.49548	-7.24296	-8.67734	-8.06627	-13.9821	-13.4706	-14.0197	-13.7853	-12.2129	-13.226	-16.0761	-14.0292	-14.2775	-15.7544	-14.4719	-20.3586	-5.98373
Fusobacterium nucleatum subsp. nucleatum ATCC 25586	-8.86324	-11.3992	-18.2277	-6.65904	-9.45124	-7.0194	-15.7819	-8.72843	-8.14665	-9.67255	-9.11068	-5.46056	-11.4392	-6.15833	-7.53556	-3.33505	-6.13936	-8.3981	-3.94867	-8.99292	-10.4025	-4.37576	-8.06693	-10.6308	-9.35447	-6.81272	-8.16453	-8.40078	-8.16147	-7.26482	-2.74664	-14.2267	-11.1283	-10.4668	-10.7774	-7.96934	-9.5674	-10.341	-13.6833	-9.05683	-11.8715	-15.1283	-11.2841	-8.52297	-8.17928	-20.6065	-12.4577	-12.4252	-6.37313
Geobacillus kaustophilus HTA426	-8.72025	1.20618	-4.96927	-5.36044	-4.87411	-2.79802	-4.89081	-1.94405	-2.21982	-2.57241	-3.35475	-4.77944	-3.82186	-3.4744	-5.26268	-2.86734	-8.80841	-4.68412	-6.61484	-3.09148	-7.31673	-3.4693	-5.85142	-3.26205	-4.27782	-4.24441	-3.78957	-6.20755	-3.38918	-2.84827	-4.54247	-7.03187	-6.6112	-3.88944	-3.03848	-4.00219	-4.18567	-2.25242	-2.32974	-2.59587	-1.58434	-6.11345	-2.97516	-2.57413	-1.16501	-1.10404	-8.57307	-6.6339	-6.75756
Geobacillus thermodenitrificans NG80-2	-6.55704	-1.66584	-1.65336	-5.29138	-2.75316	0.295432	-1.45202	-2.74509	-3.03058	-4.25584	-2.2617	-2.76573	-2.54711	-2.39158	-3.2082	-4.74947	-8.75701	-4.6012	-3.56668	-2.96556	-5.10781	-2.44867	-3.69231	-1.01359	-2.0263	-5.02148	-1.69484	-4.04497	-1.25522	-1.65049	-3.43693	2.32175	-4.36854	-1.65942	-1.80686	-3.83691	-3.98997	1.95983	0.864023	-2.46753	1.70976	0.25675	-3.68957	-2.42504	-2.02833	1.17971	-3.25883	-1.30523	-4.68348
Geobacter bemidjiensis Bem	-6.4334	2.66496	-17.395	-1.62789	3.6255	-3.18237	-19.8788	-4.84628	-6.07318	-10.9802	-3.75978	-1.84861	-7.10002	-1.81647	0.53617	-0.341084	2.00375	3.00277	2.20535	2.365	5.77081	-2.54933	0.454233	-2.35684	-2.36759	-1.19966	-1.18346	4.12988	0.0320216	-2.71045	1.01372	-17.6865	-3.6856	-5.89374	-7.06261	-2.71837	-7.0429	-7.18758	-12.1739	-8.13602	-8.95623	-13.8576	-11.2961	-4.20115	-1.72916	-19.3556	-14.0331	-14.1773	0.939699
Geobacter lovleyi SZ	-11.9546	-2.97491	-20.4293	-5.4542	-4.0436	-7.92859	-19.5311	-7.23437	-7.49529	-10.0306	-8.48812	-4.80039	-14.2273	-5.59041	-4.33496	-3.03048	-1.87629	-2.7956	-0.678886	-2.27129	-4.61666	-2.49718	-6.07974	-7.62019	-5.63777	-8.56189	-4.92264	-1.43386	-2.58062	-3.13206	2.30852	-15.5549	-12.9617	-10.2196	-13.3728	-10.2386	-9.46693	-11.5583	-13.6075	-15.777	-15.0188	-21.6627	-17.3955	-6.78457	-6.3563	-19.5131	-13.0366	-10.1209	-4.86063
Geobacter metallireducens GS-15	-8.70682	-3.78334	-21.9431	-3.35487	-0.864241	-5.7904	-19.8545	-6.92757	-8.20416	-13.5463	-6.3471	-1.77829	-10.799	-3.46765	-0.258328	-1.85777	-0.804311	0.322542	-1.61099	-4.08113	-0.299533	-3.46764	0.161674	-4.24156	-5.25714	-2.22611	-3.78183	0.805678	-4.37817	-4.83198	-2.53384	-18.0024	-7.59118	-7.8705	-10.0194	-4.9886	-8.16955	-8.23493	-14.3138	-12.5854	-14.5599	-18.0826	-12.9514	-5.56194	-2.15387	-17.0806	-14.5469	-14.6065	-0.751538
Geobacter sulfurreducens PCA	-8.55704	-1.66584	-18.6534	-1.29138	-0.753156	-3.70457	-17.452	-4.74509	-6.03058	-10.2558	-7.2617	-2.76573	-11.5471	-2.39158	-0.208203	-0.749471	-0.757013	0.398803	-1.56668	-2.96556	1.89219	-2.44867	2.30769	-3.01359	-2.0263	-0.021477	-4.69484	1.95503	-2.25522	-4.65049	-2.43693	-15.6782	-5.36854	-4.65942	-4.80686	-0.836905	-6.98997	-7.04017	-14.136	-10.4675	-15.2902	-17.7433	-12.6896	-2.42504	-4.02833	-18.8203	-14.2588	-15.3052	2.31652
Geobacter uraniireducens Rf4	-10.8499	-4.63735	-22.2659	-5.76228	-1.64558	-4.38922	-22.097	-9.40161	-8.59424	-10.8199	-7.99528	-2.89797	-13.9151	-3.00072	-3.55957	-0.586187	0.915851	-3.14652	-5.88377	-1.94717	-6.76135	-2.59157	-3.95062	-6.00233	-5.99417	-3.7404	-2.39801	-0.221399	-5.30001	-5.21055	-3.23154	-19.75	-11.3245	-9.47935	-9.67056	-6.13213	-10.5457	-8.74051	-14.6656	-10.437	-12.8343	-21.9897	-16.1317	-7.54888	-7.03427	-23.0963	-16.9612	-16.173	-3.22397
Gloeobacter violaceus PCC 7421	-11.9317	-7.69546	-15.4405	-6.78712	-6.69696	-4.42834	-19.3414	-6.51337	-6.69871	-11.9861	-6.04142	-6.90864	-13.0819	-5.03549	-7.57697	-5.63155	-7.09998	-9.17322	-7.90045	-6.00795	-5.86567	-3.59973	-4.03001	-4.12944	-3.11601	-2.84478	-3.43875	-7.28732	-3.36454	-8.30821	-7.27839	-13.9685	-10.4509	-10.5941	-10.7908	-7.21295	-8.64465	-9.84969	-13.762	-10.4949	-15.0144	-16.2234	-14.302	-9.61552	-11.0921	-17.2425	-16.1508	-16.3779	-8.25521
Gluconacetobacter diazotrophicus PAl 5	-11.2043	-6.16442	-20.9286	-6.54761	-9.21878	-14.0631	-25.2272	-9.55024	-8.79407	-13.5237	-8.62994	-3.82454	-6.67459	-3.71019	-8.40505	-4.19632	-9.94173	-6.905	-5.74147	-10.4616	-8.93623	-5.52505	-5.3229	-7.00364	-4.01952	-4.89651	-5.06055	-9.66578	-2.78335	-6.43408	-5.8469	-11.134	-9.3379	-8.57133	-9.73142	-8.4894	-10.7671	-12.8857	-15.9032	-15.9661	-1.49891	-6.27297	-5.85784	-14.0041	-13.5538	-21.9514	-11.5476	-8.66101	-4.96649
Gluconobacter oxydans 621H	-11.8398	-5.23112	-13.5189	-3.34252	-9.34218	-10.5936	-16.1513	-10.7828	-10.1465	-10.0573	-5.27316	-4.64875	-7.95721	-4.42844	-10.3612	-4.31446	-11.9431	-9.4374	-8.795	-6.61011	-11.9124	-4.13325	-6.01306	-5.45258	-8.36541	-5.61529	-5.60249	-11.0963	-3.82432	-8.57948	-6.24902	-8.37897	-12.8787	-11.2398	-11.4237	-9.06768	-11.9358	-14.8367	-16.0824	-14.0036	-6.53139	-12.3295	-9.97047	-13.7332	-13.4171	-18.8866	-8.30085	-9.26616	-7.77074
Gramella forsetii KT0803	-15.7932	-9.85052	-19.1116	-9.39028	-9.92739	-10.8391	-22.0888	-11.0338	-11.3051	-11.7146	-9.39629	-5.7858	-11.9466	-6.51088	-8.2859	-7.91889	-5.83026	-6.71976	-7.63538	-11.1476	-13.4101	-6.47818	-9.9225	-13.3733	-10.39	-9.34356	-5.83136	-13.2789	-9.44888	-7.93662	-4.58917	-16.1927	-17.72	-15.9922	-16.1423	-15.0759	-17.2732	-16.3475	-19.4163	-19.6526	-17.718	-17.2821	-17.1047	-11.6401	-11.2252	-23.2311	-11.7157	-12.7835	-9.79005
Granulibacter bethesdensis CGDNIH1	-9.17471	-5.63479	-15.3806	-2.85	-5.73362	-11.0994	-12.6204	-5.07281	-4.45796	-8.88351	-5.88516	-4.60582	-4.0672	-2.01665	-3.86134	2.32252	-5.4547	-5.83346	-5.31177	-2.07189	-3.0651	-0.938291	-1.35993	0.512077	0.659271	0.330756	-0.1373	-4.23512	0.735434	-0.789565	-1.75666	-9.25878	-7.94122	-6.30462	-9.52335	-4.3685	-9.14033	-11.9938	-12.2793	-14.3797	-5.58875	-13.1857	-5.02544	-12.0195	-8.70866	-19.7727	-10.2904	-9.24839	-1.34385
Haemophilus ducreyi 35000HP	-11.2885	-8.82364	-17.763	-6.89063	-7.80914	-14.5397	-20.6381	-6.17966	-5.62694	-13.1912	-8.16281	-6.71324	-12.6428	-6.07882	-6.40277	-7.66628	-7.97091	-7.34347	-6.60331	-5.67274	-10.4242	-5.33845	-10.5042	-11.4782	-13.0601	-12.6429	-5.92586	-8.04786	-4.85137	-4.50643	-5.48833	-16.0084	-15.0023	-16.2751	-15.722	-13.2578	-15.6648	-17.3616	-17.7467	-14.3134	-12.9865	-16.9051	-13.3453	-12.5822	-15.1293	-20.0512	-13.4686	-14.4746	-8.99047
Haemophilus influenzae PittEE	-5.77578	-5.29231	-9.98146	-1.26029	-4.26112	-8.01647	-8.66721	-3.6848	-3.14001	-4.4222	-5.84968	-4.10436	-6.08408	-3.72345	-0.630811	-4.13117	-3.17108	-3.63301	-2.73362	-3.23856	-3.78511	-0.92672	-3.99285	-4.79506	-6.33996	-5.95865	-3.51249	-2.26885	-3.43085	-2.95353	-3.07317	-12.3233	-8.31971	-7.566	-9.06033	-6.69415	-10.0409	-9.71627	-13.1119	-10.7119	-7.40221	-12.2227	-5.73899	-10.9199	-10.4177	-14.2287	-8.85891	-10.8817	-4.49586
Haemophilus somnus 129PT	-8.68691	-6.23073	-9.37672	-2.36592	-5.23181	-6.93255	-9.40951	-3.56677	-3.00747	-2.80179	-6.40459	-2.02781	-8.08479	-1.35456	-1.98483	-2.08737	-2.5688	-2.88664	-3.25475	-2.00885	-1.9226	-0.636727	-5.90074	-6.01499	-8.62945	-4.183	-1.24449	-5.65161	-2.1805	-2.943	-3.80972	-11.5519	-10.5357	-10.8278	-13.2385	-11.6938	-9.14806	-11.8626	-12.2387	-12.7697	-6.44926	-10.4478	-6.82386	-10.087	-12.6682	-12.6935	-10.9541	-10.9483	-5.3609
Hahella chejuensis KCTC 2396	-5.64461	-7.82389	-23.4288	-4.25876	-6.65299	-9.149	-13.8861	-8.11957	-9.09161	-13.5359	-5.00574	-3.26009	-17.2837	-3.6585	-7.91276	-5.38823	-8.39677	-8.58828	-8.27782	-9.24391	-13.0324	-3.80389	-11.6872	-5.79588	-13.5366	-7.86056	-5.19113	-13.4726	-9.6519	-7.28005	-9.15399	-19.5698	-11.1841	-8.98232	-13.3827	-10.8831	-10.7453	-11.2016	-10.7913	-10.6562	-18.5864	-21.3541	-17.5156	-8.89853	-7.16971	-13.3936	-18.8489	-19.6337	-8.90283
Halorhodospira halophila SL1	-9.07959	-7.54777	-17.2206	-8.7734	-1.64408	-9.02581	-15.4068	-8.97301	-8.36094	-7.71856	-5.82941	-5.59901	-12.9439	-4.9563	-3.78062	-4.58349	-6.37541	-5.73999	-8.23194	-3.99438	-5.94412	-3.90594	-5.26639	-7.35122	-8.19494	-6.53392	-6.06909	-7.10773	-3.18445	-0.677409	-1.68502	-16.1041	-7.80821	-8.17101	-10.3955	-9.26791	-12.0265	-12.8736	-14.1641	-15.2879	-13.4584	-19.0283	-12.8941	-11.9149	-12.6036	-18.6142	-11.1507	-13.1085	-5.27922
Helicobacter acinonychis str. Sheeba	-13.7704	-10.2867	-20.9733	-7.25355	-8.25531	-13.0108	-21.6571	-11.6796	-11.1349	-11.4142	-7.84636	-4.09658	-13.0782	-5.7197	-7.62258	-5.12558	-6.16252	-9.62547	-8.72434	-5.23397	-14.7784	-3.92224	-9.98744	-12.7879	-10.3324	-9.9515	-6.50811	-12.2606	-7.42643	-5.94775	-6.06879	-18.3161	-13.3125	-14.5585	-15.0534	-11.6882	-15.0343	-16.7094	-17.1052	-17.7055	-14.3961	-18.2156	-14.7326	-15.9129	-15.4101	-22.22	-14.8526	-12.8756	-8.49054
Helicobacter hepaticus ATCC 51449	-13.0458	-10.5927	-20.9347	-6.77964	-8.60898	-12.2758	-21.1176	-10.9178	-11.3522	-11.3616	-9.62119	-5.22049	-13.4895	-4.60186	-8.48824	-5.46859	-6.08225	-9.36482	-9.81276	-5.31044	-12.3728	-4.88576	-10.2572	-12.503	-12.149	-9.67508	-6.52883	-11.1919	-6.47843	-5.34116	-5.09775	-19.0509	-16.0186	-15.3267	-16.7057	-12.0848	-16.5821	-18.3136	-18.6806	-18.1721	-17.8736	-18.9471	-16.2612	-16.5339	-16.1423	-25.2743	-15.4009	-15.3856	-8.68307
Helicobacter pylori J99	-12.0399	-9.51645	-20.8729	-6.33556	-7.47119	-12.2318	-19.313	-10.9788	-10.4447	-9.35032	-7.39615	-2.81746	-12.2981	-5.21543	-6.51378	-4.38418	-6.00006	-8.61043	-7.47569	-6.61264	-13.8727	-3.30151	-9.25646	-10.8294	-10.3323	-9.00049	-4.91544	-11.1562	-6.83407	-5.17815	-4.47631	-16.3633	-12.3468	-13.5525	-14.1157	-9.88047	-14.1405	-15.7876	-16.1975	-16.8223	-14.582	-18.2697	-11.8837	-14.9463	-13.3639	-22.0553	-13.0097	-12.0592	-7.75601
Heliobacterium modesticaldum Ice1	-7.67199	-4.94603	-19.9983	-5.85666	-6.05659	-9.16138	-24.1676	-9.70692	-11.0375	-13.577	-6.75447	-2.70095	-10.1513	-0.91498	-3.84172	-2.052	-0.407585	-0.0705702	-1.23972	-8.2736	-5.97531	-3.31303	-4.82803	-7.68122	-6.65548	-4.79201	-2.15281	-5.09345	-3.5216	-10.5793	-3.84126	-16.8926	-12.0717	-13.4119	-11.5671	-8.93179	-10.9306	-12.8986	-15.0811	-16.7393	-13.8004	-16.8869	-16.23	-11.5808	-11.2374	-21.2972	-12.6626	-12.6535	-4.24532
Herminiimonas arsenicoxydans	-11.2822	-7.44695	-19.1293	-9.16767	-8.54415	-13.5425	-25.7259	-13.4157	-12.7165	-11.7277	-9.10468	-5.74404	-9.09752	-4.24845	-8.10799	-3.54326	-8.66203	-7.45139	-7.478	-4.75232	-11.756	-5.41125	-11.4242	-9.59713	-10.6016	-10.6431	-4.53157	-8.76205	-5.02861	-3.31747	-4.25609	-12.1011	-13.9625	-14.2721	-13.419	-12.5574	-17.6607	-16.6841	-18.8092	-16.2473	-14.8096	-18.141	-10.221	-19.1693	-16.7918	-25.3446	-7.74455	-9.76988	-7.55423
Herpetosiphon aurantiacus ATCC 23779	-3.72073	-6.23602	-8.1947	-4.00873	-4.16375	-4.78213	-11.7939	-1.64608	-0.749177	-8.61035	-5.48583	-3.03371	-9.83065	-5.34737	-2.73067	-3.0242	-3.2377	-5.39321	-8.05856	-6.58632	-3.86964	-3.68124	-3.79522	-4.36084	-6.26751	-2.81791	-3.80888	-5.87566	-0.974934	-4.23849	-1.70775	-13.2765	-4.68994	-1.69938	-1.96733	-3.98708	-1.60471	-2.91659	-3.69276	-5.03791	-6.90834	-8.71587	-8.07391	-1.23234	-4.61766	-7.67192	-5.12621	-9.5446	-3.54822
Hydrogenobaculum sp. Y04AAS1	-1.8297	2.65144	-6.06327	1.67266	1.6811	-2.07242	-12.7682	-8.7367	-8.1911	-8.50221	-4.88272	-1.18035	1.85763	-0.760804	2.28728	-3.18698	1.74369	-0.708059	-0.826037	-0.284302	4.14781	-0.971236	2.95331	-2.86649	-3.41501	-1.02999	0.443899	1.64925	-2.4749	-4.0112	0.883112	-7.39465	-2.3913	-0.640456	-5.12977	0.246445	-3.10661	-3.78419	-4.17876	-4.77593	0.536888	-5.29373	-1.80231	-4.99022	-3.49344	-10.315	-3.92229	-1.94327	1.45124
Hyphomonas neptunium ATCC 15444	-11.6611	-5.74757	-19.8543	-5.33575	-5.83051	-13.7644	-22.731	-10.8716	-10.1509	-14.4573	-7.32102	-3.77439	-10.7215	-2.44455	-9.24333	-5.82499	-7.79018	-8.65455	-9.59773	-10.0459	-9.24095	-2.46194	-5.79372	-11.1718	-8.18666	-8.16371	-2.7554	-13.1491	-2.34064	-8.77653	-4.50436	-14.9026	-16.523	-14.806	-17.9543	-13.9423	-13.1147	-17.1754	-18.2595	-15.5495	-15.4769	-17.978	-16.8709	-14.5203	-19.1158	-26.001	-18.4583	-16.5137	-9.73092
Idiomarina loihiensis L2TR	-12.7404	-10.1434	-23.3465	-9.27365	-12.2533	-15.522	-22.9182	-10.6753	-10.0424	-14.8796	-9.21536	-7.64263	-15.8209	-7.3681	-12.2935	-7.22171	-12.8772	-11.3527	-12.7307	-8.5301	-15.7856	-4.10735	-12.9155	-14.3074	-14.2118	-10.474	-8.53433	-14.9711	-7.74075	-6.46084	-8.17643	-22.207	-16.7377	-15.1	-17.2884	-11.9637	-17.817	-18.7104	-18.9626	-19.9124	-18.3868	-25.1534	-18.8261	-16.6285	-19.3142	-26.7194	-19.1458	-19.1094	-9.70969
Jannaschia sp. CCS1	-7.76434	-9.57608	-12.0845	-6.73577	-10.5911	-6.34776	-6.84312	-6.28561	-6.48568	-8.64638	-0.946949	-5.88717	-11.7429	-4.96383	-6.54091	-4.53774	-8.06712	-9.11769	-7.86607	-7.88336	-13.6521	-3.58301	-8.86748	-6.8694	-7.86619	-9.63049	-6.35488	-15.1513	-4.23221	-3.10812	-5.18203	-7.52481	-10.1925	-11.3591	-11.545	-11.0474	-8.44226	-7.62645	-7.56464	-8.37595	-10.6486	-15.7493	-14.9556	-8.47855	-8.97302	-11.9435	-14.7654	-14.962	-9.19098
Janthinobacterium sp. Marseille	-11.9732	-5.98918	-20.4663	-8.4614	-6.05686	-15.9388	-27.5825	-11.2577	-10.5174	-16.0673	-9.49871	-5.80212	-10.2601	-3.59949	-8.34042	-6.04315	-7.88141	-5.80409	-7.68375	-4.28554	-10.6405	-5.49932	-9.0979	-14.6487	-11.6663	-11.587	-4.93307	-8.4515	-4.5958	-4.15462	-0.703203	-15.5974	-13.9896	-14.2459	-16.3995	-12.2574	-17.4893	-18.5826	-20.6296	-17.7913	-16.054	-18.7073	-12.4295	-19.8011	-18.3713	-25.5458	-14.0741	-11.1604	-8.86867
Kineococcus radiotolerans SRS30216	-8.19401	-5.8793	-5.00952	-7.86403	-5.85795	-5.55067	1.86229	-2.87877	-2.03923	-6.52235	-7.18936	-4.94544	-5.63431	-5.14399	-10.6304	-11.7711	-14.1483	-11.2536	-10.953	-7.20195	-5.20016	-3.62599	-4.28467	-6.53815	-5.50414	-9.17553	-6.56646	-6.49239	-5.57015	-8.62027	-5.42582	-7.69409	-7.85909	-7.96227	-8.17868	-7.47152	-11.9627	-14.2017	-6.07135	-8.67845	-5.61132	-1.00219	-5.86449	-11.8259	-11.2733	-6.71418	-9.77715	-7.05859	-4.35396
Klebsiella pneumoniae subsp. pneumoniae MGH 78578	-0.646438	0.813302	-2.02387	-0.988857	-1.12196	-1.75057	-2.55557	-0.534919	0.353227	-2.45611	-5.44405	-0.0198929	1.34587	-1.31985	-0.716831	-3.99064	-3.22546	-2.37509	-2.04336	-4.53252	-0.775416	0.326917	2.27673	-2.24474	-3.1613	0.270803	-1.77581	2.17622	0.0814474	-0.152105	-0.669157	0.957964	-3.57181	-0.595595	-2.85527	-0.914628	-4.51386	-2.81505	-8.60502	-5.98781	-1.7166	-1.46063	3.10377	-2.17627	-3.57058	-5.53589	2.0721	0.675611	-3.52092
Lactobacillus acidophilus NCFM	0.0135103	-7.5332	-6.84219	-4.71235	-4.54695	-4.21977	-12.9998	-0.859661	-0.295113	-5.26845	-3.58549	-2.19349	-4.42217	-2.56111	-5.40669	-6.40556	-7.9993	-3.2867	-5.72279	-3.2607	-6.29833	-2.84599	-4.19835	-7.42207	-7.06275	-7.59346	-4.48206	-5.10295	-2.42913	-3.27508	-4.05028	-3.96779	-1.9387	-2.24421	-2.62838	-2.0203	-2.5105	-3.23912	-6.60768	-5.10618	1.19703	-3.86386	-3.18851	0.539412	-1.06472	-5.17823	-1.32646	-4.31265	-4.63064
Lactobacillus brevis ATCC 367	-7.43667	-9.94873	-10.1557	-8.21517	-7.02398	-7.50887	-14.9957	-3.30847	-3.71351	-10.6226	-8.4509	-3.54226	-10.133	-7.54004	-10.1718	-9.93278	-11.7739	-8.0634	-7.61562	-3.46734	-8.12798	-5.65398	-6.63317	-9.43548	-7.21609	-7.62126	-5.598	-8.2221	-6.64316	-7.92551	-4.19381	-8.09014	-9.91565	-11.2692	-11.5364	-11.5843	-10.2561	-10.0626	-12.3831	-6.65019	-7.60226	-7.99984	-10.0282	-5.1915	-9.86908	-14.5489	-7.23581	-6.19595	-8.81868
Lactobacillus casei ATCC 334	-5.12286	-8.47829	-5.01468	-6.52974	-6.59131	-6.79297	-9.82391	0.907736	1.55446	-7.56778	-4.43737	-2.66613	-2.35233	-5.59776	-8.54155	-7.5734	-9.11809	-8.66793	-6.96425	-6.83709	-8.27361	-4.20145	-5.29052	-8.8678	-9.80362	-6.01692	-5.79383	-9.44604	-5.06203	-2.91833	-3.45364	-8.87844	-5.2818	-7.6383	-6.81037	-8.36297	-6.27417	-8.19685	-7.42283	-6.25948	-2.95074	-7.8419	-4.38834	-6.02721	-6.7044	-5.36423	-4.75085	-3.72253	-6.93939
Lactobacillus delbrueckii subsp. bulgaricus ATCC BAA-365	-6.30867	-4.84441	-12.794	-4.91507	-5.83064	-7.55993	-16.6769	-5.19923	-4.64618	-8.2219	-6.1751	-3.73224	-7.66507	-4.09281	-8.43275	-6.68754	-8.00181	-8.37125	-5.63698	-3.68981	-5.4494	-3.35407	-4.52436	-10.5053	-11.0888	-9.67008	-4.94208	-6.07853	-4.86801	-4.52842	-4.50466	-13.0357	-11.0292	-9.3031	-10.7481	-8.27992	-10.6894	-11.3871	-8.77168	-8.33676	-8.00972	-10.9323	-11.3694	-8.60798	-7.15697	-17.0837	-8.49294	-6.49836	-6.00955
Lactobacillus gasseri ATCC 33323	-4.47815	-7.0181	-9.05446	-4.11877	-5.01079	-3.72826	-10.0035	-3.36363	-2.80783	-7.48046	-3.27808	-3.87822	-7.85232	-4.21019	-7.68244	-7.86633	-11.2587	-6.60338	-6.91698	0.167097	-7.66126	-2.48312	-5.69309	-7.73307	-8.33014	-8.89913	-5.07788	-6.33564	-4.00782	-3.71352	-5.64151	-5.26585	-5.25588	-6.53806	-5.96764	-4.46555	-6.89505	-6.60019	-8.98106	-4.53187	-4.20574	-3.16197	-6.57227	-4.8236	-6.38749	-7.35666	1.30165	-4.69863	-7.16842
Lactobacillus helveticus DPC 4571	-2.72694	-3.24127	-8.90743	-2.19942	-2.20875	-4.9656	-8.57592	-1.63781	-1.09375	-5.3499	-4.81973	-4.03308	-6.03137	-2.68961	-6.55653	-5.08073	-9.09372	-4.56499	-5.64981	-3.19711	-7.72437	-1.88618	-1.94406	-6.73042	-8.27211	-7.89415	-2.47296	-3.19467	-3.39098	-0.901395	-4.03357	-7.25877	-7.2549	-5.49856	-4.99745	-4.64031	-8.98129	-7.65472	-7.05133	-5.65384	-2.34715	-6.15858	-5.68171	-2.85613	-4.34886	-8.15057	-3.80165	-3.82615	-5.44778
Lactobacillus johnsonii NCC 533	-2.79608	-5.34133	-7.54592	-3.49334	-4.34694	-5.03803	-12.6236	-1.67331	-2.11212	-8.97108	-2.47059	-2.09428	-5.2072	-2.42993	-6.14034	-6.20322	-8.72777	-4.03339	-3.42776	-3.10072	-8.05942	-2.71456	-5.00925	-9.16299	-7.78684	-7.33216	-5.33128	-4.81641	-5.27099	-6.06364	-3.89751	-4.70271	-3.68238	-3.97946	-4.38045	-1.81288	-6.28022	-4.99984	-8.37322	-3.893	-2.57755	-2.59854	-4.95623	-3.22374	-4.81361	-9.86996	-0.0889956	-1.08022	-4.46009
Lactobacillus plantarum WCFS1	-9.79782	-11.051	-10.2281	-8.92511	-7.15972	-6.24239	-10.4831	-3.8507	-4.17559	-10.8118	-7.82687	-4.70937	-5.34098	-4.98544	-8.90202	-11.1569	-11.4654	-9.15471	-8.29413	-7.37288	-7.13623	-6.33525	-7.95106	-10.8691	-9.85076	-6.96855	-6.23269	-9.23579	-8.62652	-9.73124	-6.92823	-9.13423	-6.2542	-6.58925	-6.74176	-6.06137	-9.0811	-7.06002	-10.2315	-7.84623	-9.00244	-11.1369	-8.42922	-1.70446	-3.355	-11.5122	-6.87944	-7.8762	-8.3116
Lactobacillus reuteri F275	-13.1583	-9.7052	-14.1108	-8.90616	-9.72643	-10.3813	-18.3424	-7.02844	-7.46075	-9.53904	-10.6889	-8.26725	-8.61781	-8.67911	-9.64117	-8.58824	-13.2376	-9.51206	-9.98096	-5.40477	-11.5142	-5.95971	-7.36883	-13.6569	-14.3132	-11.8304	-9.6174	-9.36033	-8.57212	-8.46696	-8.18772	-8.20934	-14.1706	-11.4833	-13.8525	-12.2071	-13.718	-10.455	-12.819	-15.2965	-10.0082	-12.1059	-12.3997	-8.67246	-9.2886	-18.4569	-4.54309	-6.52501	-10.7818
Lactobacillus sakei subsp. sakei 23K	-7.06389	-8.61083	-8.96306	-3.80013	-5.62793	-9.29283	-10.1538	-3.93563	-3.36968	-10.3901	-8.6321	-3.22841	-5.51012	-4.61432	-9.51306	-7.48787	-11.1075	-8.38864	-8.84009	-6.32565	-9.39555	-4.89781	-5.27518	-9.52774	-7.17541	-8.70008	-1.54312	-8.21907	-3.49352	-4.3614	-2.11226	-13.0763	-10.0431	-9.35192	-10.7293	-11.1045	-14.604	-13.3364	-15.7029	-11.1922	-7.89523	-11.9726	-7.28346	-10.5563	-13.1659	-14.3037	-8.42378	-9.40802	-7.69905
Lactobacillus salivarius UCC118	-9.64386	-6.1853	-11.8775	-7.43251	-3.2279	-11.8251	-14.328	-6.5092	-5.93204	-8.31578	-7.97985	-4.41503	-7.18019	-5.0102	-6.26979	-9.10356	-8.87255	-5.12973	-3.66434	-5.81044	-6.1256	-5.25511	-4.84993	-10.3259	-12.0282	-7.50544	-3.99581	-5.08013	-5.97767	-5.01477	-3.57367	-7.90531	-11.8291	-10.1604	-12.4887	-9.73284	-8.30343	-10.0652	-10.4148	-9.82383	-9.59899	-11.8047	-10.0056	-7.26162	-8.90703	-19.2477	-7.1684	-8.13982	-8.19416
Lactococcus lactis subsp. cremoris MG1363	-6.16528	-4.62618	-13.3647	-4.84247	-1.72477	-6.09216	-15.5991	-10.0629	-9.44832	-3.86712	-2.87963	-1.60516	-10.0549	-3.01069	-6.85344	-8.66819	-7.44695	-4.82427	-6.30398	-4.06421	-3.0531	-2.93514	-1.35066	-7.47435	-7.32626	-7.65582	-4.13055	-4.22253	-6.25662	-8.77843	-5.74957	-5.24339	-7.92802	-8.29137	-8.51066	-5.35853	-6.12904	-5.98188	-9.26787	-6.37063	-4.57578	-11.17	-6.01238	-5.0092	-7.69829	-7.75693	-4.27646	-5.23446	-6.33748
Lawsonia intracellularis PHE/MN1-00	-7.09182	-5.49744	-15.4616	-4.15096	-0.458642	-6.16614	-14.6297	-2.0716	-2.55065	-8.02255	-4.80429	-3.00845	-8.3055	-5.57137	-2.14193	1.52616	0.459737	-2.33279	-3.95682	-2.80271	-4.70593	-4.4947	-0.303154	-1.61017	-0.0823174	0.187364	-5.14636	-2.75354	-6.07887	-4.21199	-5.7104	-8.15698	-9.10306	-8.25489	-7.9055	-8.82489	-6.97098	-8.58504	-9.01394	-10.6346	-10.5488	-12.0766	-9.79989	-8.65604	-8.95906	-15.5545	-6.95288	-7.04018	-5.76559
Legionella pneumophila str. Paris	-7.02754	-7.24036	-20.6521	-7.0442	-7.34455	-12.387	-25.0668	-7.11629	-7.43019	-13.2437	-5.95879	-3.72531	-12.6944	-4.11184	-9.00467	-6.3437	-8.56362	-7.30072	-8.38612	-7.55338	-9.43012	-3.37307	-7.17553	-10.2134	-9.20709	-6.28954	-5.37617	-9.4897	-5.81759	-7.00906	-5.08512	-17.5852	-12.589	-13.9131	-12.062	-9.29717	-13.3559	-12.3554	-15.5058	-16.0385	-11.3792	-16.6045	-10.7996	-14.9272	-13.5653	-21.906	-14.2835	-15.2925	-7.4291
Legionella pneumophila subsp. pneumophila str. Philadelphia 1	-6.5397	-7.83479	-19.7586	-7.78215	-7.94675	-12.0748	-22.839	-5.55699	-5.89339	-12.3316	-5.67826	-3.69232	-10.9546	-3.83998	-9.77505	-5.93973	-9.3435	-6.97888	-9.17921	-7.16893	-10.8062	-4.28841	-7.69864	-9.48432	-9.45017	-5.60592	-5.06785	-10.9414	-7.41113	-7.41968	-5.74906	-16.6424	-12.8804	-12.2255	-11.384	-9.79526	-13.7725	-13.7291	-16.9228	-16.6257	-8.59101	-15.6285	-10.0232	-14.4495	-16.112	-19.0716	-13.438	-14.4234	-7.17412
Leifsonia xyli subsp. xyli str. CTCB07	-6.71378	-5.25366	-9.9888	-6.5055	-4.29932	-12.8874	-3.47205	-4.57892	-4.00031	-4.42909	-7.02159	-6.43068	-7.2624	-4.05752	-9.35578	-8.17746	-12.959	-9.21603	-8.75667	-4.86865	-3.2138	-5.29443	-4.91911	-4.42288	-8.13195	-5.60323	-6.04974	-4.18267	-5.03622	-5.09429	-7.6289	-8.00725	-6.92438	-7.25798	-6.58064	-5.80829	-8.38759	-12.1531	-8.50043	-8.89844	-7.68543	-4.90729	-4.09402	-10.3452	-9.99429	-12.3619	-9.26011	-8.23023	-8.2517
Leptospira borgpetersenii serovar Hardjo-bovis JB197	-10.3933	-9.71064	-21.4954	-8.69661	-10.8235	-10.9775	-21.4791	-11.3925	-10.7351	-13.0618	-9.5938	-4.68297	-14.7402	-6.75593	-8.69722	-4.81323	-6.26852	-7.87354	-8.10808	-6.05275	-12.6191	-5.25956	-10.5554	-15.2672	-14.2231	-12.3995	-7.97272	-10.7702	-9.28871	-6.24336	-3.64616	-19.3701	-12.6695	-12.0193	-12.182	-12.6438	-12.5975	-14.542	-16.7474	-15.4985	-17.3629	-20.3477	-16.7975	-13.3027	-10.971	-22.8227	-17.1932	-17.1732	-7.09352
Leptospira interrogans serovar Copenhageni str. Fiocruz L1-130	-11.9122	-8.94242	-21.3456	-9.43771	-11.0133	-11.9053	-24.4145	-13.1815	-13.4452	-13.9475	-11.464	-3.79649	-14.153	-5.56971	-9.32238	-5.00154	-6.86451	-7.7761	-9.66772	-6.23888	-14.5625	-6.49228	-11.0385	-17.5554	-16.5728	-12.5048	-7.89885	-11.3936	-10.5461	-7.0808	-4.66478	-19.459	-12.8981	-12.1599	-13.3122	-11.196	-13.4161	-13.5029	-15.5574	-15.7445	-16.9392	-22.5618	-18.3186	-14.7469	-13.3222	-25.439	-14.9517	-16.0315	-8.84228
Leptothrix cholodnii SP-6	-5.85673	-7.64221	-11.2805	-7.76437	-7.64989	-5.39251	-4.11736	-7.41089	-7.60293	-7.83374	-4.99913	-3.89885	-5.9289	-3.00364	-2.56104	-4.59	-4.08549	-2.14878	-0.885167	-5.95224	-5.77005	-2.59225	-9.95724	-7.01293	-8.00434	-6.74913	-5.40143	-10.2269	-4.3054	-2.2187	-2.23546	-10.7681	-8.33502	-4.48892	-6.68058	-8.13888	-8.55398	-8.74961	-7.67363	-10.4418	-7.84923	-10.009	-6.14579	-10.5545	-10.0391	-4.10845	-10.9769	-11.19	-6.22658
Leuconostoc mesenteroides subsp. mesenteroides ATCC 8293	-8.61069	-5.15279	-6.82471	-5.39762	-4.19394	-6.79538	-15.2598	-5.47616	-4.89968	-8.26215	-6.96003	-2.40719	-5.1413	-0.987712	-8.22856	-5.06845	-8.83107	-6.08853	-5.61997	-2.7828	-10.0838	-2.23617	-4.81709	-10.2799	-10.979	-7.45908	-3.97016	-6.03137	-0.949905	-3.97709	-4.54743	-8.8571	-10.784	-8.11404	-9.44512	-6.69702	-8.26349	-8.02349	-10.3742	-9.7883	-4.5581	-4.75625	-2.96375	-3.22182	-5.86547	-10.1935	-7.12503	-6.09709	-5.16669
Listeria innocua Clip11262	-3.76729	-3.02559	-7.17217	-6.90872	-2.13482	-7.22285	-3.40624	0.184295	0.857994	-4.75467	-2.80931	-4.70731	-8.2947	-1.96843	-7.88766	-6.13164	-11.4517	-8.13457	-7.2812	-6.34882	-7.09718	-4.32996	-3.92121	-6.82343	-3.80338	-4.92575	-6.21339	-6.20146	-4.60108	-6.69435	-4.90719	-9.07525	-7.20986	-7.54622	-6.69933	-8.02995	-7.04459	-8.02083	-8.19503	-8.82039	-9.95314	-8.07587	-7.38065	-8.67456	-10.3266	-7.45997	-6.82655	-5.82183	-10.2956
Listeria monocytogenes EGD-e	-3.31081	-1.64015	-6.34799	-5.64692	-2.7533	-6.9218	-1.27789	-0.300413	0.353677	-2.91041	-3.54612	-2.67778	-6.62074	-2.70806	-6.65138	-5.74088	-9.22429	-6.81232	-5.06595	-4.98708	-5.51366	-4.24252	-3.47462	-7.14505	-5.09503	-4.28294	-6.91856	-6.67235	-4.21961	-6.14408	-2.58774	-5.21852	-4.55097	-5.90302	-4.06838	-4.55827	-5.49884	-6.43656	-6.64847	-8.42616	-7.23593	-5.19163	-3.6716	-6.21921	-5.89048	-8.68258	-4.05694	-3.0341	-8.04722
Listeria welshimeri serovar 6b str. SLCC5334	-6.13053	-5.48493	-9.02823	-7.53464	-3.59799	-5.79829	-2.84234	-0.100724	0.546296	-3.58173	-2.44182	-4.6666	-10.3632	-4.6023	-8.54619	-5.58032	-11.1226	-7.67397	-6.96857	-3.84323	-5.28341	-4.20319	-2.29805	-7.8791	-3.81552	-5.0278	-4.79896	-5.45538	-4.06847	-4.92754	-4.45914	-7.8922	-9.29277	-8.64912	-7.82089	-9.37096	-6.28335	-6.20663	-7.43206	-6.26634	-10.9623	-9.85604	-8.39982	-6.0351	-9.71208	-4.37721	-7.76324	-5.73513	-9.94386
Magnetococcus sp. MC-1	-11.0025	-8.01156	-22.5244	-7.47263	-7.07765	-9.95478	-25.6635	-10.2945	-9.5522	-20.1249	-8.51536	-1.80487	-11.3118	-3.61371	-2.34893	-2.06295	-1.88938	-5.81733	-3.69132	-9.30792	-9.678	-1.50266	-9.12642	-6.69364	-8.71119	-5.62641	-4.94941	-10.4791	-7.61963	-11.1901	-3.72158	-18.6643	-15.0336	-13.2871	-13.4414	-8.28683	-11.5245	-12.621	-14.6643	-18.8136	-18.1095	-24.7777	-16.483	-10.8271	-9.3947	-27.597	-20.1332	-19.2228	-6.88125
Magnetospirillum magneticum AMB-1	-13.07	-4.79289	-24.7388	-4.82817	-6.78258	-10.4934	-28.7589	-13.7047	-13.8772	-18.2683	-10.1194	-4.92753	-12.3698	-6.09328	-4.60556	-2.70627	-4.12591	-5.21657	-5.92831	-9.11043	-10.0421	-4.61354	-8.16429	-7.34477	-8.3212	-8.01997	-5.50666	-6.39665	-7.47324	-7.473	-7.35668	-19.3463	-19.6656	-17.7883	-15.9949	-13.3494	-11.8122	-14.035	-17.9251	-17.5921	-17.3254	-21.6284	-15.5955	-13.7271	-12.1884	-27.4908	-17.4775	-20.7322	-6.30753
Mannheimia succiniciproducens MBEL55E	-8.95648	-4.43452	-7.01448	-2.67198	-6.52732	-2.92944	-7.13221	-6.84446	-6.23588	-3.50617	-4.75717	-3.58975	-6.78562	-2.87769	-4.6726	-3.46089	-6.26913	-3.61645	-4.12439	-1.89389	-4.78764	-1.86227	-6.14527	-6.17476	-6.0066	-5.35886	-1.98021	-3.9414	-3.08076	-6.53259	-6.5919	-5.90577	-8.63645	-7.99817	-7.23028	-5.13751	-9.87909	-9.71808	-11.0149	-6.16805	-1.29109	-6.82672	-4.72541	-7.77859	-5.46619	-7.40951	-5.97175	-8.92943	-5.19424
Maricaulis maris MCS10	-14.8108	-10.0618	-23.2519	-10.9321	-11.1703	-13.2507	-23.5159	-15.8656	-15.1899	-13.8361	-10.8343	-5.71025	-12.3608	-5.99268	-10.9081	-7.16768	-11.4712	-12.1632	-13.2996	-12.3831	-11.1529	-3.33749	-9.96378	-13.8885	-13.8709	-10.9868	-6.2409	-17.2504	-4.63736	-10.747	-1.93718	-15.1594	-17.2731	-18.6076	-16.7599	-12.0748	-19.0967	-19.0767	-21.2471	-19.8572	-17.0235	-20.163	-17.45	-16.7172	-17.3671	-27.5345	-16.902	-16.8994	-10.3184
Marinobacter aquaeolei VT8	-14.7514	-11.5668	-27.0571	-10.7317	-7.58285	-13.3414	-23.8048	-15.2681	-14.4693	-15.6201	-10.9396	-3.88556	-18.7171	-4.9582	-6.53805	-10.5303	-7.0645	-6.11324	-8.86337	-8.87368	-9.63553	-6.58171	-13.8549	-7.84928	-10.8468	-5.61378	-6.34831	-13.1406	-9.22192	-10.0926	-9.17449	-22.491	-16.1725	-12.3409	-14.526	-14.0345	-17.4266	-15.6092	-19.5493	-20.3667	-18.6208	-25.7132	-18.9292	-14.4678	-17.9637	-28.9203	-21.736	-21.9303	-7.18596
Marinomonas sp. MWYL1	-3.94156	-6.70248	-8.46176	-3.7901	-9.70315	-6.43304	-1.37111	-2.52697	-3.71141	-6.00624	-4.04701	-3.90996	-5.1023	-3.03967	-6.57905	-3.63698	-7.10188	-5.17639	-7.90246	-5.0153	-12.8783	-2.60072	-9.03962	-10.1448	-12.1307	-10.8574	-5.44366	-15.2952	-5.37235	-3.32003	-4.28403	-9.99524	-6.46625	-2.60805	-2.80536	-7.22273	-5.65664	-8.86293	-4.77367	-4.50188	-9.03638	-8.25202	-7.32283	-5.62356	-9.09906	-8.26027	-6.17389	-5.40295	-5.25898
Mesoplasma florum L1	-6.77931	-6.68437	-10.5292	-3.59244	-6.55066	-3.53054	-9.10221	-6.68558	-6.28058	-5.57482	-4.30884	-3.2016	-6.6787	-3.55256	-4.11959	-4.96301	-5.13676	-4.70112	-4.05225	-6.29024	-7.39142	-2.10209	-6.85116	-5.25905	-6.21591	-5.35445	-4.2654	-6.58345	-3.24451	-4.54292	-4.78976	-7.43123	-8.20963	-8.19881	-9.14693	-6.84187	-8.13246	-7.57229	-8.31607	-6.56179	-5.7434	-10.4875	-6.60648	-8.08415	-8.92325	-9.3062	-8.38243	-7.70853	-4.65548
Mesorhizobium loti MAFF303099	-3.86878	-5.96027	-15.0023	-3.32579	-8.76578	-10.2328	-7.6685	-8.50434	-8.43744	-12.0002	-4.13236	-4.33608	-5.96183	-5.72598	-3.96516	-4.46381	-5.4424	-4.63099	-3.34603	-1.40048	-5.31102	-2.84316	-6.90256	-6.13786	-3.82691	-2.09469	-4.27669	-3.60818	-3.80816	-4.52047	-3.25269	-8.49218	-6.55284	-9.29073	-7.7316	-5.09995	-3.02577	-8.52029	-10.0618	-9.80933	-9.33127	-12.3916	-12.1815	-7.0531	-5.2972	-8.82097	-8.5889	-11.4955	-4.99912
Mesorhizobium sp. BNC1	-2.05322	-6.78116	-10.7025	-5.82326	-4.7723	-7.48562	-11.7081	-10.6814	-10.8555	-4.23404	-2.10999	-0.925187	-1.33459	-4.08636	-4.60215	-5.69736	-6.12282	-4.21144	-2.92496	-6.09805	-3.02072	-2.61186	-5.14804	-4.31868	-1.29642	-3.99886	-3.49851	-7.38356	-4.46011	-8.45308	-3.34726	-1.30002	-2.63959	-5.76479	-3.97012	-2.33291	-7.79192	-8.01249	-9.90535	-12.5804	0.712722	-1.57869	-1.55963	-5.71367	-7.17688	-11.4607	-4.43751	-4.68881	-3.30123
Methylacidiphilum infernorum V4	-8.28345	-3.73374	-14.5643	-3.93566	-3.83523	-3.18268	-13.8661	-5.18739	-4.56928	-7.07296	-2.9488	-3.61332	-10.2093	-6.08522	-2.95072	-4.78411	-2.54237	-4.93814	-5.39961	-3.16033	-3.20346	-1.97382	-4.46683	1.35542	1.49235	-3.82397	-3.21478	-1.37951	-2.35614	0.0819623	-4.83819	-15.4372	-9.09358	-12.4574	-10.6698	-5.48331	-9.27045	-7.13132	-9.41088	-11.4839	-10.7391	-12.3674	-11.1767	-8.13836	-6.82764	-13.954	-16.4514	-14.4099	-4.41662
Methylibium petroleiphilum PM1	-11.9525	-6.71023	-27.4853	-6.79339	-6.70998	-14.4382	-24.404	-13.542	-13.7255	-17.0286	-9.05319	-5.91142	-15.1249	-6.04429	-5.58135	-3.64298	-9.10396	-6.1799	-7.90468	-8.02343	-7.89228	-4.60181	-8.05026	-10.1619	-11.147	-8.87131	-5.44908	-12.304	-7.38097	-2.3331	-3.29027	-20.0248	-15.4832	-13.6234	-15.8215	-13.2336	-15.6699	-17.8776	-18.7866	-18.5096	-17.0608	-27.2837	-18.3459	-16.6324	-19.1067	-27.2799	-14.1995	-13.4307	-9.26314
Methylobacillus flagellatus KT	-8.07649	-5.43808	-19.933	-4.49997	-4.55093	-9.76076	-17.7128	-5.04126	-5.39629	-2.48372	-5.41051	-3.66327	-11.2869	-2.57028	-4.51326	-1.53153	-5.09069	-3.63125	-2.93789	-4.8	-5.21441	-2.19082	-4.2451	-2.7996	-2.73178	-1.95121	-3.76277	-6.38949	-5.02313	-4.86273	-5.42034	-11.7956	-9.21559	-8.57302	-11.7469	-6.3147	-9.21876	-9.13779	-12.3671	-11.218	-10.8812	-13.7568	-14.3192	-8.97945	-12.6579	-20.2859	-12.6763	-12.6468	-5.91229
Methylobacterium chloromethanicum CM4	-8.89975	-7.35357	-24.6115	-4.05626	-4.26275	-11.8568	-26.3747	-9.91814	-8.99916	-13.9828	-7.58651	-2.06919	-9.26746	-2.41211	-5.76401	-3.10227	-4.26706	-3.43504	-4.09608	-1.71538	-5.09634	-2.70162	-3.96848	-5.64047	-5.52121	-5.02891	-0.887083	-6.99796	-2.10972	-5.44533	-2.79913	-14.858	-12.9759	-10.9491	-14.2384	-9.16135	-10.8241	-13.1623	-15.9044	-19.158	-13.3834	-14.3512	-12.5125	-14.3658	-12.7292	-25.001	-15.6157	-14.0909	-3.61422
Methylobacterium extorquens PA1	-8.33636	-5.97733	-22.324	-2.90419	-3.94283	-11.615	-20.5777	-9.08152	-8.22751	-12.815	-7.26954	-1.96723	-7.9455	-2.20086	-4.6582	-1.84305	-3.17327	-3.29402	-4.98126	-1.30651	-4.3814	-2.64044	-3.42275	-5.76031	-3.7127	-4.35212	-0.633814	-5.59962	-1.68066	-3.78857	-0.503898	-13.1042	-12.0821	-10.1618	-13.3905	-8.6113	-11.1358	-13.3938	-15.2392	-18.7767	-12.9481	-13.4443	-10.1802	-13.9378	-11.3688	-24.9715	-14.1291	-11.4436	-3.40679
Methylobacterium radiotolerans JCM 2831	-7.46785	-5.71482	-13.9851	-3.20874	-5.56297	-9.0819	-22.277	-6.82383	-5.82446	-4.16791	-7.9061	-2.20714	-6.77353	-3.60324	-5.87474	-3.32556	-4.3637	-4.55406	-6.22944	-2.11967	-7.81158	-1.77625	-3.51705	-6.52372	-7.30224	-3.67042	-3.12189	-4.36399	-2.52624	-5.08647	-4.07352	-10.8793	-10.8948	-8.73818	-8.10889	-6.71207	-9.52533	-9.95234	-13.5794	-15.5372	-11.0273	-13.583	-6.01205	-8.77505	-7.06801	-21.0594	-6.28828	-8.98729	-5.83093
Methylobacterium sp. 4-46	-5.60243	-5.79799	-14.3222	-2.24663	-5.63161	-6.13309	-19.74	-8.04837	-7.0274	-9.44817	-4.98194	-3.24693	-4.16001	-4.64548	-5.90345	-1.37353	-4.38867	-3.58018	-4.26588	-0.214321	-3.97982	-0.797053	-4.64665	-9.7311	-5.48108	-5.81561	-2.17476	-4.44683	-2.6221	-5.23415	-2.135	-7.40212	-5.11489	-5.92413	-5.31723	-4.84225	-5.69274	-7.14199	-8.74061	-10.6277	-9.45072	-9.16645	-10.3937	-6.8692	-9.14555	-15.3136	-9.71326	-10.4768	-2.88539
Methylocella silvestris BL2	-11.1551	-2.12737	-21.8294	-3.52971	-1.18471	-13.037	-23.0889	-6.48746	-5.73476	-16.4262	-7.60202	-4.81962	-10.5851	-3.68691	-6.39176	-6.16431	-5.92936	-3.88419	-6.72955	-4.42424	-0.873274	-3.51969	-3.275	-2.92795	-0.944478	0.169095	-2.0337	-4.62084	0.256483	-5.37462	-3.81656	-14.018	-13.2635	-9.50204	-11.6606	-10.4401	-11.7079	-11.8211	-13.845	-17.9291	-13.4028	-17.1506	-14.7655	-10.9612	-12.5154	-23.8649	-14.4455	-13.5528	-4.94594
Methylococcus capsulatus str. Bath	-9.57204	-2.86207	-18.817	-3.8006	-3.97373	-4.09613	-19.919	-4.59352	-4.92853	-8.39145	-3.6969	-4.69441	-10.0024	-2.8584	-1.79166	-4.96735	-4.35948	-4.0016	-5.19432	-5.19454	-3.84751	-1.29455	-5.73027	-2.53239	-2.50035	-3.65145	-1.08871	-4.97876	-2.43815	-4.45867	-5.77167	-12.7032	-8.92711	-5.27106	-11.4287	-7.82866	-4.81112	-4.77053	-6.9615	-10.6536	-7.64189	-11.6913	-9.07353	-5.4817	-8.14281	-15.1267	-12.4926	-10.4793	-6.19167
Microcystis aeruginosa NIES-843	-15.403	-5.67442	-23.8242	-8.19084	-3.5296	-11.057	-29.0553	-12.717	-11.7277	-17.0326	-8.86957	-3.18906	-18.5915	-6.58248	-3.86136	-1.30181	-3.35206	-9.54127	-6.21268	-6.07389	-7.73028	-3.76673	-9.45452	-10.4234	-6.21511	-7.59945	-2.09605	-7.32362	-8.47962	-9.01463	-6.0434	-25.6337	-15.789	-16.6484	-17.0087	-9.64929	-18.4448	-14.8613	-18.5019	-14.4938	-21.8281	-23.3097	-16.8318	-14.7293	-14.0303	-25.9374	-23.0875	-22.7571	-4.80524
Moorella thermoacetica ATCC 39073	-4.25571	-2.70856	-6.51734	-1.914	-2.80939	-4.16154	-8.80328	-1.15811	-1.54084	-3.02455	-6.93258	-0.611434	-1.17295	-3.06778	-2.92821	-2.757	-1.52031	1.08834	-1.37755	-1.13779	0.831839	-0.964904	0.560432	1.39541	-0.465048	0.215499	-1.19507	3.65719	-0.332787	-5.88524	-0.817432	-2.39154	-4.05469	-2.41842	-4.63242	-0.454047	-4.23727	-6.09624	-9.37733	-7.45741	-0.700617	-7.32089	-5.138	-5.10813	-4.79741	-7.90773	0.589842	3.63143	1.60182
Mycobacterium avium 104	-5.59295	-13.151	-12.9016	-7.97447	-8.09161	-9.72764	-25.3849	-6.45551	-6.57353	-16.3452	-6.41396	-4.01025	-9.52872	-4.2998	-6.70684	-6.96606	-12.2166	-11.3617	-10.0325	-9.49371	-10.7075	-4.6673	-7.67146	-8.16115	-11.0845	-13.6649	-4.75177	-11.786	-3.87781	-7.08973	-8.64113	-12.8757	-7.48696	-8.52084	-7.77477	-5.86241	-9.44851	-10.7421	-11.5419	-14.9516	-9.58046	-15.2798	-5.76982	-10.1356	-10.5364	-16.4382	-13.7868	-11.1681	-3.50127
Mycobacterium bovis AF2122/97	-5.30036	-13.2363	-15.1231	-7.58187	-8.28464	-9.11359	-18.4988	-8.67358	-8.91047	-16.7146	-6.6844	-3.83439	-7.85109	-6.75517	-5.43029	-9.25787	-11.9652	-11.9446	-9.7642	-8.53445	-7.05906	-6.53535	-7.41635	-12.1515	-13.1657	-14.0241	-6.1125	-11.7524	-2.86091	-9.55002	-7.90571	-10.363	-12.4833	-10.7065	-8.86999	-8.58551	-11.8827	-13.0121	-10.0167	-13.0377	-10.6886	-10.515	-10.0398	-14.0872	-12.628	-13.1206	-11.7491	-8.8749	-7.00618
Mycobacterium gilvum PYR-GCK	-5.94465	-7.38276	-16.7172	-9.06814	-8.28721	-4.87517	-18.5218	-8.98734	-9.06259	-14.0763	-5.61175	-4.07861	-11.3797	-6.428	-8.77241	-9.12125	-12.2744	-11.4451	-9.10573	-8.74762	-8.15311	-4.70691	-6.0119	-7.71055	-9.58432	-8.08119	-7.90637	-10.0281	-7.14328	-7.49689	-6.82168	-16.0078	-14.0478	-13.0117	-12.3067	-7.20499	-12.8792	-17.2241	-15.9575	-12.1881	-7.50551	-15.5152	-13.6249	-11.3989	-13.7568	-13.0839	-14.7412	-17.2315	-6.63087
Mycobacterium leprae TN	-5.69967	-8.21275	-13.8661	-5.16539	-4.1795	-7.93712	-14.5251	-6.61158	-6.06793	-9.30961	-4.803	-3.99228	-8.00198	-3.67073	-5.51504	-4.05261	-9.05047	-7.52701	-5.60299	-5.17396	-6.69047	-2.86347	-6.91682	-5.69437	-5.23429	-6.85819	-3.45089	-8.15328	-2.36873	-3.87233	-6.01145	-13.2228	-10.2187	-9.46093	-10.9624	-8.61024	-12.948	-12.6204	-11.0175	-14.6213	-10.3164	-15.1228	-10.6498	-13.8205	-14.3104	-17.107	-8.76974	-9.79519	-6.42086
Mycobacterium smegmatis str. MC2 155	-4.6143	-7.80528	-5.35213	-5.25004	-7.63764	-2.13757	-11.7811	-5.06837	-5.04544	-4.47287	-4.98864	-2.2506	-6.1947	-3.64915	-6.90606	-8.37769	-11.3909	-6.58246	-6.26922	-7.22265	-5.99464	-2.79896	-4.65808	-2.74935	-6.49673	-4.82829	-3.17938	-9.45409	-3.6305	-4.24709	-4.14036	-7.44913	-5.13435	-3.94051	-5.33565	-6.85373	-5.70754	-8.15877	-8.75486	-7.63572	-2.48877	-3.21905	-5.42792	-7.87746	-7.15236	-6.33609	-5.75132	-5.5208	-2.89028
Mycobacterium sp. JLS	-8.05436	-8.45361	-13.9776	-8.09719	-6.34642	-5.9197	-19.8836	-7.15809	-7.21885	-10.3051	-6.67345	-3.10258	-8.65853	-7.46626	-6.79308	-8.16661	-11.2925	-10.4693	-9.12983	-7.8262	-7.29168	-2.72022	-5.11798	-8.88168	-11.7376	-9.20786	-5.95296	-8.10067	-6.22485	-8.62231	-5.87617	-15.3805	-8.22421	-11.1645	-9.47382	-7.31153	-13.0141	-16.3757	-14.0875	-13.2613	-9.80931	-8.92441	-9.90373	-12.4793	-13.8236	-17.2869	-15.0524	-11.5814	-8.67177
Mycobacterium sp. KMS	-8.20577	-7.5503	-14.3416	-8.13748	-6.42684	-6.98006	-17.3884	-8.39772	-8.43751	-10.6211	-6.7586	-3.13808	-8.05469	-7.51772	-7.82212	-8.22696	-12.3179	-11.5013	-10.1645	-8.93414	-7.48251	-2.73955	-5.26425	-9.11742	-10.9468	-8.38002	-6.01601	-9.19886	-7.33635	-8.79393	-5.94991	-14.9114	-9.4687	-11.3749	-9.70545	-7.45835	-12.2008	-16.5858	-14.2671	-13.3622	-10.2415	-11.5096	-10.2987	-13.5888	-13.9143	-17.5684	-16.4931	-14.0798	-8.72894
Mycobacterium sp. MCS	-7.96987	-7.3991	-13.7768	-8.07481	-5.30089	-6.88547	-16.6046	-7.02637	-7.09834	-10.1289	-5.62593	-3.084	-7.44317	-7.43687	-7.77714	-8.1318	-12.2786	-11.4508	-10.1112	-8.76571	-7.18498	-2.70993	-5.03629	-8.7499	-10.6197	-9.11044	-5.91714	-9.04486	-7.16208	-8.52579	-5.83428	-14.0926	-9.08831	-11.0468	-9.34503	-7.22949	-11.9102	-16.2589	-13.9874	-13.2049	-9.57466	-10.6082	-9.68843	-13.4175	-13.7723	-17.1305	-15.8121	-13.3111	-8.64024
Mycobacterium tuberculosis CDC1551	-4.65149	-14.4946	-16.8472	-7.69998	-9.51837	-9.29227	-20.5112	-10.1342	-10.3437	-17.4183	-6.88317	-5.87347	-9.51972	-7.91441	-6.51556	-9.47234	-13.0439	-12.0782	-9.84231	-7.79895	-7.50794	-6.57166	-6.75781	-13.6943	-13.6968	-14.4846	-6.29725	-14.0573	-3.14246	-10.9728	-8.11604	-12.2333	-13.019	-9.20049	-10.38	-9.93543	-13.3059	-13.4764	-11.4315	-14.2949	-12.4081	-11.4386	-9.72703	-15.3849	-12.8911	-16.7425	-14.5114	-10.6889	-7.14701
Mycobacterium ulcerans Agy99	-7.61569	-11.4686	-16.7725	-8.68842	-9.49506	-9.27447	-22.4066	-8.08651	-8.29899	-17.3462	-5.86293	-4.86925	-11.4498	-5.89856	-8.50733	-9.45124	-11.0363	-11.0654	-10.8347	-8.77212	-8.46221	-6.56803	-8.72302	-11.6389	-13.6429	-14.4381	-5.27879	-10.0271	-5.11392	-9.92978	-8.09494	-14.1421	-11.9641	-8.15016	-10.3278	-6.89987	-13.2627	-15.4289	-11.3892	-11.269	-13.3328	-12.3415	-8.65534	-11.355	-13.8649	-16.6788	-17.4318	-15.6036	-7.13294
Mycobacterium vanbaalenii PYR-1	-8.20823	-8.55187	-15.3476	-9.13814	-6.42814	-3.98104	-18.3967	-7.40167	-7.4411	-10.6262	-5.75998	-4.13869	-10.0613	-7.51854	-8.8226	-8.22792	-13.3183	-11.5018	-9.16507	-8.93589	-8.48562	-5.73987	-8.26663	-11.1213	-11.9502	-11.3828	-9.01702	-10.2004	-6.33816	-5.79671	-7.9511	-16.9202	-11.4727	-13.3783	-10.7092	-6.46074	-12.2038	-15.5893	-17.2701	-12.3639	-9.24863	-15.5193	-13.3053	-10.5906	-12.9158	-11.573	-17.5004	-16.088	-6.72988
Mycoplasma agalactiae PG2	-6.34741	-6.29151	-15.408	-4.8633	-6.97828	-7.24968	-13.9635	-8.31555	-7.88995	-8.19093	-4.69896	-4.21152	-8.32259	-3.80946	-5.28052	-4.203	-7.31513	-6.9659	-5.17764	-5.76359	-9.04601	-3.18728	-7.44447	-7.90195	-7.74551	-6.83182	-4.62071	-9.06458	-4.61574	-5.97913	-5.16041	-14.1923	-8.94997	-7.93284	-8.87688	-8.48099	-9.89371	-12.3561	-9.03428	-10.3142	-10.4036	-13.2301	-9.31739	-9.88893	-9.73338	-14.1803	-13.9774	-11.2783	-5.09135
Mycoplasma capricolum subsp. capricolum ATCC 27343	-7.99204	-8.99002	-14.3892	-5.23084	-5.49745	-5.07443	-11.9507	-7.00678	-6.56157	-4.91003	-4.13646	-4.22624	-9.03141	-5.12278	-5.51915	-4.5126	-6.57985	-6.32693	-5.37189	-6.30503	-8.79536	-4.3181	-7.11439	-5.64143	-8.37566	-6.4056	-5.0458	-7.66658	-6.04958	-4.49291	-6.5987	-11.0324	-9.78691	-9.77243	-8.7009	-7.20792	-10.7471	-10.2328	-9.84951	-8.17843	-10.1315	-12.0502	-9.09981	-8.81153	-7.68101	-12.1733	-9.64639	-10.918	-6.63059
Mycoplasma gallisepticum R	-8.19724	-8.13016	-16.1771	-4.78704	-4.86246	-8.05868	-13.7351	-7.15109	-6.7306	-9.02648	-6.59626	-3.20872	-11.1543	-6.73977	-8.23387	-5.13663	-9.26339	-8.89125	-7.14077	-5.63809	-9.87244	-3.1623	-7.28791	-7.73121	-7.60316	-6.70304	-5.52497	-8.9329	-5.51658	-4.86231	-5.06096	-13.9932	-11.7546	-10.7383	-11.6843	-7.31188	-9.69335	-11.15	-10.8444	-10.1143	-11.231	-14.0359	-11.1316	-10.6753	-9.51673	-15.9492	-11.8208	-12.1284	-6.97243
Mycoplasma hyopneumoniae 232	-6.86536	-6.77574	-10.6633	-4.63044	-5.61357	-5.63881	-12.2322	-7.78243	-7.37407	-7.6671	-6.36822	-3.203	-8.77759	-2.59029	-6.14135	-3.99744	-7.16086	-4.73821	-5.0689	-5.36169	-6.49022	-3.11344	-6.94122	-7.35591	-6.29457	-5.42505	-3.318	-6.65335	-4.30005	-5.60799	-5.84491	-11.548	-6.32198	-10.3096	-8.25777	-4.93856	-7.24836	-7.69176	-9.42484	-7.67504	-7.84473	-9.60143	-7.71566	-9.20542	-9.04425	-10.4386	-10.473	-11.7953	-2.71903
Mycoplasma mobile 163K	-5.30613	-5.18632	-11.7846	-2.40169	-6.21687	-0.940683	-9.3898	-5.14291	-4.75802	-4.07398	-5.9805	-1.19434	-7.12495	-4.35273	-3.01472	-3.7855	-4.02074	-3.51532	-2.97344	-4.89923	-5.85055	-3.04827	-5.35479	-3.72972	-5.79341	-4.9773	-4.98425	-5.21798	-3.94362	-4.1916	-3.49308	-9.77826	-6.59025	-6.59184	-6.53551	-3.31109	-8.49128	-7.91031	-9.71833	-6.94464	-5.17643	-9.85042	-5.99517	-6.42223	-6.27016	-10.5785	-9.88078	-10.2273	-3.3224
Mycoplasma mycoides subsp. mycoides SC str. PG1	-9.74302	-11.9167	-13.9992	-4.58216	-8.07056	-5.31277	-14.7045	-9.79275	-9.30815	-7.97523	-7.29889	-4.34876	-8.88156	-6.08236	-5.56714	-4.56629	-6.73925	-6.6735	-6.30928	-5.79211	-8.8637	-3.92918	-7.91767	-8.70564	-9.24099	-7.1324	-6.30141	-7.59389	-7.29035	-6.98739	-6.87069	-11.2376	-12.0526	-12.0858	-10.9254	-10.1853	-11.0166	-12.5579	-12.0618	-9.54335	-10.0376	-14.2067	-8.13945	-10.3348	-10.3511	-14.8814	-10.4568	-10.6478	-6.29375
Mycoplasma penetrans HF-2	-10.9119	-9.10338	-12.2483	-6.74027	-9.23328	-9.52558	-13.9768	-10.9598	-10.4721	-8.18337	-7.40908	-3.37805	-11.0564	-5.18254	-7.70537	-4.68482	-9.89148	-10.8332	-8.44088	-8.93636	-10.0655	-5.0124	-9.09037	-9.90913	-9.43252	-9.31158	-6.42907	-10.8011	-6.41448	-8.13902	-6.9987	-12.4471	-15.2711	-14.3112	-15.1393	-12.3758	-11.2321	-13.7785	-12.2748	-11.7704	-13.2182	-15.4119	-10.3319	-11.5775	-11.6123	-18.1437	-13.6324	-12.8157	-7.46592
Mycoplasma pneumoniae M129	-7.84626	-6.75544	-14.6336	-4.62191	-5.59955	-6.61475	-13.2034	-6.76098	-6.35336	-7.64659	-5.35505	-2.20269	-7.75569	-3.58188	-7.13645	-3.98974	-8.15543	-5.72989	-6.06514	-3.34582	-6.46828	-3.11087	-3.92124	-7.3344	-6.27707	-6.40932	-4.30629	-6.63775	-6.28771	-4.59352	-3.83264	-12.5221	-10.2971	-9.28502	-10.2332	-7.9171	-8.22266	-8.66527	-8.4007	-9.64988	-9.82229	-11.5762	-9.69148	-6.17848	-6.01734	-14.4092	-10.4529	-10.7761	-4.70484
Mycoplasma pulmonis UAB CTIP	-5.71831	-8.69235	-11.9744	-4.06664	-5.27271	-5.72348	-10.5301	-4.71602	-4.2787	-5.60204	-5.95134	-4.21933	-10.7329	-2.98695	-4.4098	-5.37617	-6.45853	-6.16538	-5.28175	-4.07461	-7.47632	-3.25758	-6.83034	-6.32611	-5.1043	-6.15781	-4.86257	-7.40369	-5.86376	-6.27232	-7.41039	-8.67824	-6.43185	-6.41507	-5.35147	-4.89907	-8.38601	-9.86208	-7.50333	-3.81039	-8.82479	-10.7044	-8.77032	-7.41881	-8.27536	-9.75146	-9.3629	-9.64702	-3.39606
Mycoplasma synoviae 53	-7.55815	-6.45063	-12.1828	-5.49952	-6.39207	-5.25361	-11.7688	-5.43416	-5.03818	-7.33935	-5.15577	-4.19813	-8.42207	-4.45754	-6.06758	-4.87757	-8.07919	-6.61054	-6.01285	-6.10709	-8.13812	-3.07521	-5.61942	-7.01096	-7.01632	-6.17585	-5.13227	-6.40866	-5.10291	-5.37735	-4.64968	-9.12845	-6.92049	-7.9146	-8.86159	-7.59358	-8.83362	-7.26398	-9.03662	-7.2721	-10.4806	-10.1921	-9.32317	-7.77369	-7.61534	-8.96605	-11.1488	-11.4845	-5.49634
Myxococcus xanthus DK 1622	-10.8937	-4.9753	-24.0667	-6.33355	-7.77824	-5.24199	-22.756	-11.5477	-11.4763	-14.0515	-10.1464	-4.3452	-17.0394	-2.7333	-5.97134	-5.47197	-3.44778	-3.63574	-3.35416	-7.41781	-9.34184	-3.84785	-3.92644	-7.17557	-6.85865	-6.1202	-2.28606	-9.62316	-4.82529	-6.54678	-6.26343	-20.598	-12.5939	-13.3249	-13.7705	-9.12406	-14.057	-9.55585	-12.0921	-13.8266	-19.4166	-26.5111	-19.2574	-12.0702	-9.31131	-20.8687	-18.6731	-18.5942	-6.01024
Neisseria gonorrhoeae FA 1090	-11.5982	-8.14054	-20.8049	-7.38445	-7.18114	-13.7842	-19.2342	-10.4637	-9.8875	-10.242	-8.95257	-5.40417	-13.1267	-3.97924	-6.21298	-7.05523	-8.81539	-9.07298	-7.60318	-4.77239	-10.068	-4.229	-7.80473	-10.2626	-10.9605	-7.44164	-4.9605	-10.013	-5.93946	-4.96291	-5.53755	-12.839	-13.767	-14.0966	-14.4287	-11.6835	-15.2484	-16.0078	-17.3589	-17.7749	-13.5427	-18.738	-17.948	-17.2068	-17.8498	-23.1731	-15.1087	-13.081	-8.15632
Neisseria meningitidis 053442	-10.6727	-6.21357	-20.9234	-7.46276	-8.25743	-13.8509	-19.3874	-10.538	-9.96023	-10.3625	-9.9971	-5.42163	-10.2141	-4.02976	-7.30546	-7.1341	-7.90842	-9.16547	-7.70267	-4.8345	-8.16204	-4.27146	-7.87851	-11.3659	-10.071	-7.54582	-4.01811	-9.12253	-6.00186	-5.0476	-5.5965	-14.9474	-12.8685	-14.2007	-14.5267	-10.764	-14.3382	-16.1015	-15.4502	-17.8547	-13.6347	-18.847	-18.0421	-16.2962	-17.9431	-22.2949	-15.2062	-13.1771	-8.21799
Neorickettsia sennetsu str. Miyayama	-10.0461	-10.1468	-17.9673	-7.98095	-8.41813	-10.4267	-19.594	-9.09495	-9.62412	-14.1331	-8.84059	-3.27334	-13.1547	-4.68245	-8.07013	-4.10874	-8.19041	-8.07047	-7.85011	-8.19799	-13.0349	-2.63395	-8.20268	-8.87409	-8.47194	-7.41609	-4.78576	-11.7772	-5.78609	-7.37541	-3.35154	-16.3691	-14.1513	-12.1595	-13.0415	-10.3983	-12.1212	-13.6412	-14.1819	-14.6027	-14.2877	-18.3565	-12.3388	-11.3306	-11.277	-19.8012	-14.735	-11.9581	-7.60204
Nitratiruptor sp. SB155-2	-6.89891	-4.44511	-15.7057	-1.61215	-1.45509	-6.13653	-16.8263	-5.77386	-5.21087	-10.1313	-7.53268	-3.15033	-9.32306	-4.50082	-2.28499	-5.31247	-0.875354	-5.17063	-2.5882	-4.18716	-1.18841	-3.78623	-2.1114	-8.30275	-6.93563	-3.4731	-2.41281	-2.97131	-5.35635	-2.17767	-4.98007	-15.8455	-8.82072	-7.12241	-10.5143	-4.92495	-8.40462	-9.12907	-9.49988	-11.0084	-10.699	-15.7415	-10.0814	-8.35191	-8.94961	-18.0364	-14.2169	-12.2054	-5.55259
Nitrobacter hamburgensis X14	-9.81441	-6.61198	-20.1905	-4.75135	-5.62307	-16.3721	-20.9914	-11.3534	-11.5491	-12.7478	-8.97523	-6.89344	-8.84334	-4.98547	-8.55189	-5.5662	-9.07714	-9.13467	-10.8765	-2.92071	-5.71602	-4.58802	-6.91612	-5.94716	-6.94111	-9.69487	-2.38018	-9.19246	-6.2719	-6.16807	-3.21105	-17.6561	-12.2697	-13.4295	-13.6184	-13.097	-12.5028	-13.6932	-14.6237	-18.4117	-14.7569	-14.8894	-12.0583	-16.5198	-14.0089	-25.0328	-13.8796	-18.085	-8.21032
Nitrobacter winogradskyi Nb-255	-13.9365	-8.16563	-20.4833	-3.99789	-7.27182	-13.3302	-18.8342	-11.0105	-11.3289	-14.072	-7.90653	-6.71889	-13.5532	-3.06209	-7.9651	-5.27042	-10.5258	-8.24401	-11.3507	-5.48195	-5.31361	-4.35848	-7.08657	-5.07668	-4.06588	-5.16252	-5.31967	-7.38998	-4.74193	-4.89888	-5.02322	-13.4049	-13.456	-12.7847	-15.9348	-11.2038	-13.247	-13.2382	-16.3971	-17.9627	-12.2286	-15.4173	-15.6517	-14.8394	-14.4826	-22.7497	-14.122	-16.1259	-6.38306
Nitrosococcus oceani ATCC 19707	-8.70994	-7.97777	-18.0674	-7.87755	-2.08784	-10.1859	-16.2624	-8.75016	-8.07907	-8.64767	-5.77632	-6.70347	-9.20821	-0.936324	-4.86022	-2.08385	-3.42535	-7.09626	-6.25645	-4.30358	-3.02384	-3.31985	-3.86515	0.26218	0.285616	3.1547	-2.177	-7.13662	-5.55326	-5.62509	-4.86757	-13.9651	-10.1267	-10.4654	-10.6197	-4.97091	-7.97601	-10.9473	-11.1265	-16.7717	-10.861	-13.9619	-7.28983	-13.6182	-11.2731	-20.362	-10.7277	-9.72031	-4.26546
Nitrosomonas europaea ATCC 19718	-10.2495	-7.70294	-20.5069	-6.90915	-2.80362	-9.15682	-16.7893	-9.15159	-8.53451	-11.0138	-5.92896	-5.61101	-12.1649	-5.06388	-5.92317	-3.75095	-4.51536	-5.90573	-7.3726	-7.13276	-3.16029	-2.9629	-6.43349	-5.59567	-4.45555	-0.775701	-3.19067	-6.33461	-4.32758	-0.877933	-4.8128	-16.3814	-12.046	-10.4097	-12.6241	-7.44752	-7.22987	-8.08842	-12.3698	-12.4515	-14.692	-18.3105	-14.1294	-10.1014	-11.7907	-17.8974	-15.401	-15.3594	-7.39405
Nitrosomonas eutropha C91	-9.52034	-6.94737	-18.9677	-6.11528	-2.0538	-6.36072	-12.4076	-8.43899	-7.81344	-10.489	-5.08717	-4.62884	-11.5234	-4.23297	-5.13492	-2.01318	-3.72259	-6.15819	-5.57871	-6.35241	-3.50511	-4.04611	-5.69955	-1.9873	-2.87218	-1.16106	-2.38169	-4.68932	-2.55559	-2.19887	-5.01445	-13.8321	-10.4267	-11.7904	-11.9898	-8.73277	-8.55383	-9.4313	-10.6972	-12.7079	-14.0716	-15.7702	-13.5105	-9.39433	-11.0826	-16.3502	-15.8077	-15.7683	-6.57111
Nitrosospira multiformis ATCC 25196	-9.20909	-8.55278	-19.1672	-7.5842	-6.66598	-8.85243	-21.0315	-9.18749	-9.53743	-12.7246	-7.4873	-5.67145	-11.4749	-4.64858	-5.59289	-3.6507	-6.16777	-6.73503	-6.01193	-7.90598	-6.38373	-4.22069	-8.375	-2.99485	-2.93728	-4.13905	-3.85129	-7.55047	-4.13436	-4.02184	-2.51534	-16.0336	-12.4051	-11.7597	-10.9286	-12.4527	-9.37725	-8.30677	-10.5264	-13.3363	-13.0809	-16.0014	-13.5177	-9.11562	-10.7902	-17.5102	-13.8905	-13.8646	-8.98927
Nocardia farcinica IFM 10152	-9.18155	-10.5349	-16.283	-11.131	-5.41408	-10.9705	-22.3073	-9.35908	-10.4023	-17.5705	-7.74498	-2.13221	-7.99042	-8.50959	-7.81743	-10.2175	-10.3138	-10.4963	-8.15882	-8.91691	-9.45203	-7.73637	-8.24086	-11.0798	-10.9136	-13.3527	-9.00602	-12.1833	-6.3186	-7.7666	-4.93823	-16.8252	-13.4295	-10.3413	-10.6683	-9.43488	-14.1709	-13.5521	-16.2384	-15.3461	-10.1713	-13.4143	-6.23475	-13.5714	-12.8999	-22.5233	-13.4217	-15.9988	-4.71973
Nocardioides sp. JS614	-5.40984	-4.02746	-12.488	-3.92457	-5.98599	-7.64774	-7.80696	-4.18748	-3.32572	-8.96653	-8.31091	-1.97903	-5.10951	-2.22966	-5.67229	-4.87914	-8.18586	-5.31407	-6.99585	-7.36029	-5.47487	-3.64801	-2.49401	-6.87506	-8.81974	-7.44244	-4.66805	-5.65388	-4.7374	-5.87512	-3.54366	-6.32082	-5.19769	-3.26467	-4.50023	-6.68333	-6.22522	-10.4933	-7.32585	-5.82705	-10.1258	-7.67838	-6.34633	-6.99498	-4.41743	-9.1048	-8.31437	-4.647	-3.43392
Nostoc sp. PCC 7120	-9.29906	-6.60927	-17.5687	-8.16256	-5.47572	-5.01668	-19.7026	-6.54774	-6.57402	-7.81579	-0.811085	-6.16149	-14.3056	-5.54867	-5.84044	-4.26288	-4.33386	-6.52044	-7.1868	-7.00037	-7.59985	-2.7521	-7.3543	-4.26235	-5.07439	-3.48453	-5.05416	-5.25829	-8.40442	-6.89876	-7.9945	-17.2487	-10.62	-9.5044	-12.8487	-2.54872	-5.31611	-5.71589	-8.3781	-10.4244	-17.5155	-19.8826	-17.5483	-3.65557	-5.96949	-17.7426	-20.7714	-18.3961	-4.76473
Novosphingobium aromaticivorans DSM 12444	-13.3239	-7.25385	-13.1709	-6.59012	-9.30064	-10.1258	-23.5657	-12.704	-12.9391	-17.7614	-9.69773	-4.83686	-11.8947	-7.76609	-6.43634	-6.27275	-9.9708	-10.9541	-10.7697	-9.55226	-10.0891	-4.53785	-10.4392	-8.18781	-7.20145	-6.05519	-6.12513	-13.7734	-6.87987	-6.57841	-7.92003	-11.4196	-16.519	-12.7396	-14.904	-16.609	-12.911	-11.0431	-15.0445	-13.0552	-11.7355	-9.57498	-9.08479	-11.1075	-10.646	-20.1621	-9.79892	-12.9278	-10.0158
Oceanobacillus iheyensis HTE831	-2.65251	-2.74088	-6.8377	-1.33216	-5.82419	-2.75948	-2.70798	-0.861154	-1.14102	0.559251	1.68385	0.226331	-3.70709	-0.440223	-4.2405	-3.81884	-6.78751	-4.65024	-4.59523	-4.03928	-9.23002	-0.460865	-3.78539	-5.15882	-5.1735	-5.15205	-0.750452	-7.14056	-3.33363	-1.76618	-4.49884	-5.88406	-2.51034	-6.79397	-4.94222	-2.93365	-5.10442	-4.16425	-4.24934	-5.54282	-2.46145	-5.9586	-4.85593	-2.5125	-0.108625	-4.98614	-3.44181	-7.49647	-4.72705
Ochrobactrum anthropi ATCC 49188	-5.30819	-2.95802	-6.26144	-0.896318	-3.92617	-3.60242	-6.49015	-5.04114	-4.19005	-1.75702	-2.25368	-2.96281	-2.88325	-4.18972	-4.65276	-2.82902	-7.1684	-4.28619	-2.97567	-1.28586	-8.34555	-2.63756	-4.39544	-4.71633	-3.67155	-0.317345	-2.62059	-6.57862	-0.658854	-0.755328	-1.48856	-6.02212	0.9621	-4.1223	-4.34851	-4.58367	-1.10151	-9.35573	-4.20598	-3.75732	-3.88073	-5.35569	-5.11715	-4.91579	-7.35009	-5.92052	-5.05878	-5.36652	-6.39637
Oenococcus oeni PSU-1	-5.15581	-5.68694	-9.55998	-4.72926	-7.66769	-4.40622	-10.3846	-4.0513	-3.50068	-6.99044	-4.082	-4.57949	-2.49724	-5.98686	-7.20488	-8.52695	-10.7666	-7.16053	-6.38078	-3.56056	-7.25855	-4.23461	-5.37204	-8.30058	-8.87241	-9.4646	-6.81921	-7.84634	-5.74221	-5.36239	-2.38104	-2.82967	-8.82524	-8.0914	-9.55048	-5.1122	-6.50361	-7.19474	-4.58264	-5.15927	0.165871	-4.72689	-3.18748	-6.41215	-4.9471	-10.838	-3.30927	-6.3195	-5.86433
Oligotropha carboxidovorans OM5	-13.0117	-6.01857	-16.5427	-3.47614	-6.08416	-13.9598	-22.689	-11.306	-11.5631	-13.143	-7.52058	-5.80574	-4.32811	-5.61816	-9.35159	-9.06914	-10.8919	-9.82146	-10.6937	-6.31494	-6.68976	-2.50371	-7.13537	-9.70773	-10.7253	-9.63877	-5.95453	-8.48774	-3.6271	-7.20118	-5.72734	-11.6853	-15.0474	-13.3001	-14.4546	-10.2961	-14.5355	-16.633	-17.6752	-19.8206	-10.127	-9.79988	-8.49988	-14.8352	-13.402	-24.6131	-12.1518	-13.2424	-8.88519
Onion yellows phytoplasma OY-M	-7.45937	-9.41217	-16.5795	-5.92241	-8.06591	-9.39243	-15.1341	-9.43727	-9.008	-9.31428	-4.77533	-5.21373	-11.4472	-5.86223	-5.31738	-6.25387	-7.35601	-7.02382	-6.20703	-6.85732	-10.1757	-4.20717	-9.56107	-10.0296	-9.85274	-8.92903	-6.69292	-9.16487	-5.69014	-7.06694	-7.23522	-15.3398	-10.0955	-10.0782	-10.0203	-7.60714	-10.0427	-10.5093	-11.1759	-11.4636	-11.5315	-15.3741	-12.455	-10.0486	-9.89598	-16.3527	-13.094	-13.3898	-6.1817
Opitutus terrae PB90-1	-11.1246	-5.83108	-10.8577	-6.84408	-1.81596	-8.51879	-8.92531	-6.78112	-5.94838	-10.3801	-6.15025	-6.93531	-15.4856	-4.11576	-6.6166	-3.7351	-7.13588	-7.2331	-5.93922	-5.15081	-4.11175	-4.61901	-5.21735	-3.42997	-0.401953	-1.08871	-3.53314	-6.43911	-4.51601	-9.53797	-10.3873	-13.4985	-6.75079	-5.86497	-9.07579	-4.40326	-9.87853	-9.10838	-10.9895	-11.6302	-12.4505	-13.7918	-13.7134	-8.77078	-7.22602	-15.5891	-13.6087	-11.875	-6.32804
Orientia tsutsugamushi Boryong	-16.0189	-13.3251	-24.8784	-11.8882	-13.3386	-14.895	-27.7978	-15.0402	-15.5347	-19.5893	-12.1239	-6.80362	-15.1976	-8.86789	-13.7943	-11.5351	-14.0838	-15.0077	-13.5257	-12.8839	-17.3987	-6.67587	-13.2179	-16.2635	-16.7378	-14.5393	-10.2878	-17.2418	-9.24606	-13.1653	-9.85622	-21.8181	-18.7057	-16.7987	-17.5425	-14.6226	-18.6326	-20.2125	-20.6685	-17.2437	-18.3989	-19.7578	-17.586	-19.1564	-18.3239	-25.8697	-19.796	-19.9294	-10.6245
Parabacteroides distasonis ATCC 8503	-12.2015	-4.16226	-6.92276	-4.54658	-3.2168	-4.0616	-16.2191	-10.5466	-9.7906	-10.518	-7.62832	-2.82425	-8.66935	1.29116	-3.40428	0.805536	-3.94102	-0.903791	1.25922	-3.45945	-3.93255	-2.52474	-1.3201	0.000777529	2.98486	2.10732	-0.0589895	-1.66316	-1.78102	-6.43061	-3.84514	-14.1272	-12.3336	-10.5673	-11.7273	-9.48652	-8.76366	-7.88194	-12.8998	-10.9639	-12.4933	-12.2658	-9.85243	-8.0016	-6.55154	-17.9464	-12.5416	-10.6547	-3.9653
Paracoccus denitrificans PD1222	-5.55684	-9.12678	-17.8195	-2.96471	-8.07099	-6.71206	-11.2702	-3.40218	-3.52429	-10.2704	-3.39364	-6.00388	-8.44481	-3.28615	-4.70007	-1.94925	-6.2106	-7.35259	-6.02523	-4.46746	-6.66168	-1.66344	-3.63647	-7.10472	-5.03252	-6.62135	-3.73544	-5.76029	-5.85023	-3.04753	-2.62209	-11.7645	-9.42976	-6.47034	-6.72049	-9.82713	-5.40442	-8.69291	-9.49926	-9.92716	-10.4894	-12.159	-10.6852	-9.1081	-6.51316	-12.3723	-12.6924	-15.0637	-7.48801
Parvibaculum lavamentivorans DS-1	-9.87731	-8.91554	-19.2767	-3.42396	-7.98825	-10.886	-23.3186	-8.138	-8.40394	-14.879	-7.44417	-3.79331	-10.0921	-6.55254	-10.3119	-3.97748	-6.85464	-9.7598	-10.6584	-8.21212	-8.51776	-3.48819	-7.00447	-7.5019	-10.5192	-10.4575	-4.87914	-10.3602	-4.51761	-1.0385	-4.64268	-12.3804	-10.8458	-8.11074	-11.2623	-10.1608	-12.3741	-14.4572	-15.516	-14.7177	-15.8739	-16.4791	-11.2555	-10.7156	-10.2939	-21.378	-14.8821	-12.9583	-4.82706
Pasteurella multocida subsp. multocida str. Pm70	-7.65213	-4.19339	-9.89061	-2.44118	-5.23636	-3.83249	-9.34498	-3.51744	-2.9401	-1.32916	-4.98479	-4.41694	-4.1899	-2.0158	-4.28002	-3.1123	-3.88284	-1.13997	-2.67534	-1.81732	-5.13603	-1.25981	-1.85811	-5.33735	-5.04043	-2.51699	-0.00219383	-2.09227	-2.98459	-4.02416	-2.58021	-10.9173	-4.8404	-8.1719	-6.49957	-4.74177	-9.31339	-7.07558	-10.4249	-9.83267	-5.60919	-10.8168	-7.01604	-6.27152	-3.91737	-7.2612	-9.17922	-10.1505	-4.20099
Pediococcus pentosaceus ATCC 25745	-10.4782	-5.0181	-12.0545	-4.11877	-1.01079	-5.72826	-15.0035	-7.36363	-7.80783	-6.48046	-6.27808	-1.87822	-5.85232	-1.21019	-8.68244	-7.86633	-11.2587	-7.60338	-7.91698	-4.8329	-8.66126	-4.48312	-1.69309	-8.73307	-6.33014	-5.89913	-4.07788	-4.33564	-4.00782	-5.71352	-3.64151	-4.26585	-11.2559	-7.53806	-10.9676	-7.46555	-9.89505	-12.6002	-11.9811	-7.53187	-3.20574	-9.16197	-6.57227	-7.8236	-6.38749	-11.3567	-6.69835	-8.69863	-6.16842
Pelobacter carbinolicus DSM 2380	-8.38924	-10.5327	-16.3322	-6.21698	-4.62633	-7.60632	-19.0068	-4.54315	-4.83814	-8.93261	-7.16587	-2.75229	-12.2707	-3.30472	4.85166	-0.624698	5.29967	0.488731	2.48626	0.164467	-1.89302	-2.42625	-3.52863	-6.75901	-4.76713	-3.79087	-3.5957	-4.87358	-4.117	-4.44713	-2.32697	-13.3232	-9.12024	-8.4229	-7.56974	-1.66643	-8.7889	-6.82256	-12.9365	-12.3337	-15.9947	-19.3725	-14.4017	-7.26959	-7.88484	-21.5295	-13.9427	-11.9757	-2.60525
Pelobacter propionicus DSM 2379	-8.13462	-7.11189	-22.7883	-4.52218	-2.17045	-11.0261	-17.0315	-4.46138	-6.71012	-12.3856	-6.59039	-4.81759	-13.5481	-2.67717	-5.38616	-4.15087	-2.92414	-4.87541	-4.72453	-1.40864	-2.84705	-1.51744	-3.25505	-4.89644	-4.91319	-5.80353	-3.02247	-4.60201	-3.72691	-3.34984	-1.80388	-16.97	-11.2326	-8.47318	-9.63107	-8.41952	-9.68328	-11.7942	-13.8207	-13.9137	-16.363	-19.0999	-15.7272	-5.94332	-7.49931	-23.8288	-15.4031	-12.508	-3.93734
Pelodictyon luteolum DSM 273	-6.92674	-6.46069	-18.3295	-5.72322	-2.51548	-10.0749	-16.9144	-4.79214	-6.20899	-9.77651	-8.14848	-3.47194	-11.5149	-3.20101	-1.61024	-4.40182	-4.21415	-2.47442	-4.028	-3.04564	-6.48269	-4.40919	-4.1297	-5.71932	-5.44928	-2.90189	-4.21309	-7.49298	-3.21473	-3.33749	-3.79652	-15.3206	-13.2151	-12.5555	-13.8612	-11.0377	-9.64375	-13.4208	-13.761	-14.1237	-12.951	-15.2229	-14.3653	-9.59806	-9.25723	-18.7105	-14.5422	-13.5087	-5.42406
Pelodictyon phaeoclathratiforme BU-1	-7.95574	-8.33285	-20.7211	-6.42078	-4.44496	-9.67603	-20.4252	-8.90901	-8.26851	-15.2656	-10.3405	-3.65586	-12.1178	-5.49824	-2.43731	-6.42147	-5.01703	-4.53373	-4.86675	-4.70323	-8.06028	-5.16215	-7.12673	-10.6223	-10.5448	-8.77991	-5.68136	-5.24084	-3.92173	-5.71809	-3.3332	-16.5818	-14.0435	-13.403	-14.5818	-9.18879	-11.0744	-13.9841	-14.2219	-16.1091	-14.7017	-18.5374	-16.1404	-10.8543	-8.53579	-21.082	-15.4836	-15.4513	-5.84074
Pelotomaculum thermopropionicum SI	-4.48836	-2.79138	-15.666	-3.75252	-4.90373	-6.04089	-23.7123	-7.49914	-9.83772	-15.2368	-6.64865	-0.689018	-7.87902	-2.81063	-2.74824	-5.89563	-4.31769	-3.9424	-4.15477	-4.12822	0.259447	-3.27849	-2.64841	-2.40807	-6.3705	-5.53359	-3.03462	-0.881656	-1.36821	-7.3578	0.286923	-10.5464	-6.80637	-7.15316	-5.31304	-2.74219	-9.71109	-14.6634	-15.8613	-14.5813	-8.51059	-10.5295	-8.94371	-13.3982	-11.0628	-18.9842	-7.35172	-4.33509	-3.14607
Petrotoga mobilis SJ95	-0.149356	-0.696285	2.90318	2.10382	-2.71712	0.627052	-0.324506	-0.0196505	-1.45213	-3.52492	1.31648	-0.263743	-2.6076	-0.672981	-0.629124	-1.57874	-1.22533	-1.50043	-1.96774	-4.39729	0.497058	2.04608	-3.35997	-2.64464	-4.30012	-3.81804	0.389622	-1.34698	-0.564683	-4.45695	-0.180582	0.803273	-1.1585	3.52911	0.159121	-1.19736	2.29276	6.55623	8.19201	2.71335	0.00247901	-0.0932395	-3.38867	3.33851	5.72298	6.55757	-2.53177	-2.51391	0.22604
Photobacterium profundum SS9	-9.88021	-9.34082	-11.5656	-6.05109	-8.25205	-7.8487	-13.3108	-6.88814	-5.97163	-5.94205	-7.57551	-3.06516	-13.2189	-3.40515	-8.76036	-4.09394	-9.26385	-9.43059	-9.09191	-8.70133	-13.0716	-5.69934	-10.9496	-12.6099	-13.4937	-9.00606	-5.87864	-11.9848	-7.09508	-4.42284	-2.78926	-17.7933	-12.9445	-8.92188	-12.2088	-9.14234	-9.80011	-11.1354	-10.8812	-9.14496	-8.33057	-13.2803	-13.4638	-8.35134	-6.71719	-13.965	-14.5614	-14.0301	-8.60699
Photorhabdus luminescens subsp. laumondii TTO1	-11.196	-12.8807	-17.0139	-4.86459	-5.85914	-8.55158	-19.1438	-9.88157	-10.0418	-13.5264	-8.19047	-3.94574	-13.6386	-4.14479	-7.63082	-5.77214	-6.14869	-7.25417	-3.95342	-4.20341	-11.2027	-3.62619	-7.2866	-10.5412	-13.5071	-11.178	-5.56741	-7.49391	-6.57169	-7.62262	-6.42692	-13.6997	-16.8622	-14.965	-15.1816	-13.4735	-14.9652	-14.2044	-17.0737	-12.6798	-15.6159	-19.0082	-15.8688	-13.8275	-11.2746	-16.7178	-14.782	-12.0639	-10.3547
Polaromonas naphthalenivorans CJ2	-6.42785	-4.0397	-17.5283	-5.92953	-5.9965	-9.65569	-13.8634	-6.21358	-6.34989	-8.0037	-6.32105	-4.98199	-11.1501	-6.23666	-5.67572	-6.88788	-8.18892	-7.3189	-4.99944	-6.37345	-5.49777	-2.64988	-5.51146	-9.90319	-10.8459	-9.46449	-7.67638	-10.6671	-3.75127	-2.8963	-3.55335	-10.3744	-10.2261	-8.28988	-8.52716	-7.70096	-12.2472	-13.5177	-9.3471	-10.8394	-13.1698	-16.7364	-10.3874	-11.0089	-13.4293	-17.1375	-8.36014	-10.6973	-6.44056
Polaromonas sp. JS666	-5.85385	-3.3236	-14.5039	-5.0441	-2.23759	-6.8378	-13.2249	-6.8478	-5.93461	-6.88717	-4.56069	-3.05978	-4.15386	-2.39572	-2.75545	-3.08262	-1.25953	-4.42455	-6.08632	-3.68236	-7.03825	-2.69628	-3.92406	-9.56879	-8.45646	-7.97518	1.13277	-6.96696	-1.0753	0.60752	-0.775916	-6.70659	-9.90236	-8.88513	-11.1688	-8.1167	-9.76778	-10.0991	-9.85008	-14.1273	-11.2597	-15.1854	-9.39857	-10.3318	-9.70088	-13.9165	-5.48858	-6.94861	-3.59725
Polynucleobacter sp. QLW-P1DMWA-1	-8.903	-5.43771	-16.2914	-4.69931	-4.49149	-10.0542	-13.8648	-6.76831	-7.18568	-6.73761	-7.13436	-4.46777	-4.48657	-3.18506	-6.58244	-3.37688	-6.18632	-8.44597	-6.99851	-5.02594	-9.45271	-3.39677	-7.10624	-8.68621	-6.41382	-6.86855	-3.19496	-7.45855	-5.19482	-0.310311	-3.77789	-10.2855	-13.1827	-9.52234	-13.8299	-10.0121	-13.6152	-15.391	-15.7319	-16.0987	-13.9212	-11.1875	-9.33496	-16.57	-14.2281	-22.6716	-7.51058	-9.47744	-5.40507
Porphyromonas gingivalis W83	-15.1983	-10.7451	-22.1736	-9.9508	-8.76812	-11.4186	-24.4227	-15.0679	-14.4994	-16.6024	-8.71296	-6.28257	-15.6637	-8.70655	-9.69497	-7.63082	-11.2921	-9.56412	-8.03997	-11.4383	-13.5645	-5.98554	-9.40855	-11.7117	-9.37174	-9.88576	-8.64884	-13.4201	-9.60549	-10.5118	-8.21969	-18.266	-17.2247	-16.5391	-15.9049	-15.2505	-14.7664	-16.5053	-18.8682	-17.3406	-17.0564	-22.1627	-16.4491	-14.7216	-14.3404	-24.522	-14.5939	-14.5749	-8.81659
Prochlorococcus marinus str. MIT 9313	-11.6179	-6.11949	-13.4531	-7.37966	-7.20131	-8.65801	-14.3879	-5.49416	-6.89465	-5.92827	-5.55792	-6.56075	-8.35784	-4.65877	-5.35465	-1.11867	-9.9552	-7.26188	-9.80323	-6.61646	-8.35778	-3.73114	-9.81185	-2.69219	-4.49079	-5.87807	-5.7325	-9.47587	-6.79567	-2.13635	-7.33346	-13.3707	-9.16617	-9.52319	-10.7777	-6.77766	-10.4735	-10.291	-13.6037	-8.83293	-11.8394	-12.2839	-9.26864	-9.39828	-11.0804	-15.8483	-14.4889	-13.4477	-6.9527
Propionibacterium acnes KPA171202	-6.71491	-8.21027	-1.61314	-8.4654	-7.29542	-6.73673	-0.599536	-3.59405	-3.99202	-4.09291	-5.61509	-3.5697	-1.47932	-5.72188	-13.4489	-9.21742	-13.0484	-11.3656	-11.8991	-10.6961	-6.48085	-4.77041	-6.90742	-8.83003	-8.63822	-10.0157	-6.80395	-9.61041	-1.87733	-6.24955	-6.40784	0.477501	-0.300591	-2.6592	-0.907106	-2.88094	-7.58971	-9.41325	-1.72159	-5.92977	-2.96759	2.56228	-1.39847	-6.50804	-7.19209	-7.00882	-2.62587	-0.584139	-3.02307
Pseudoalteromonas atlantica T6c	-10.762	-10.5744	-9.07953	-4.73504	-9.58964	-14.3466	-11.8362	-8.28244	-8.48271	-7.64162	-5.94562	-4.88688	-7.73823	-4.96281	-5.5404	-5.53639	-7.06664	-6.11688	-6.86558	-7.8816	-6.64908	-4.58278	-11.8652	-5.86575	-7.86266	-6.62746	-2.35369	-9.14939	-5.23034	-4.1053	-5.18066	-10.5187	-13.1889	-14.3558	-12.5416	-11.0451	-15.4394	-11.6233	-12.5619	-11.3743	-10.6436	-11.7427	-8.95082	-11.4766	-7.97132	-17.9393	-12.7601	-9.95625	-11.1901
Pseudoalteromonas haloplanktis TAC125	-13.6267	-10.7207	-21.7878	-9.32126	-10.8051	-12.7447	-22.6387	-11.8297	-11.1111	-12.3908	-11.3015	-5.7715	-14.6637	-7.42715	-11.2319	-8.80023	-11.7794	-10.6371	-9.58763	-8.0194	-14.197	-5.45761	-11.7603	-14.1196	-12.1338	-11.1169	-8.7355	-15.1149	-9.31249	-7.73496	-8.48218	-19.8282	-17.472	-16.7577	-19.9056	-13.9076	-18.0735	-17.1307	-20.2187	-18.5226	-20.415	-20.9002	-18.8108	-17.489	-17.087	-23.9413	-16.3922	-16.4446	-10.7154
Pseudomonas aeruginosa PA7	-7.38848	-5.66536	-17.7884	-3.18687	-6.52212	-7.05139	-16.006	-10.6932	-11.7061	-11.0024	-4.86141	-3.18511	-11.5512	-0.577803	-3.8584	-3.29645	-6.34949	-7.53839	-6.209	-5.06366	-10.7121	-4.76464	-6.44055	-9.40096	-8.19557	-7.58352	-4.09025	-6.31456	-3.46917	-6.99853	-4.03663	-16.5794	-8.76536	-7.62832	-9.98638	-6.63527	-7.42685	-9.84096	-7.48465	-10.4841	-12.784	-16.2494	-12.7919	-4.71907	-6.02187	-12.9102	-15.043	-13.7062	-5.79954
Pseudomonas entomophila L48	-8.60458	-7.15877	-19.9282	-6.97761	-8.09823	-12.7326	-16.422	-9.47274	-8.58942	-11.3693	-6.4205	-4.01233	-10.5559	-3.30418	-6.70901	-7.97144	-7.21854	-6.36467	-7.03487	-4.50216	-10.7223	-4.66855	-8.68273	-14.1793	-12.1012	-11.6789	-4.75702	-8.79425	-4.88668	-6.10331	-3.64724	-9.91169	-10.5054	-9.5371	-7.79227	-7.87377	-9.46272	-9.75795	-8.55561	-13.9595	-9.60993	-9.31892	-11.7972	-10.1445	-7.54384	-18.4594	-10.8174	-13.202	-6.50554
Pseudomonas fluorescens Pf-5	-9.30375	-5.61223	-17.5802	-2.16382	-4.47816	-8.01851	-8.7185	-6.55534	-7.58092	-3.82559	-3.81373	-4.1627	-9.31839	-0.550209	-4.84138	-6.26467	-4.33467	-3.52139	-5.18795	-4.0037	-8.60575	-2.75274	-4.35883	-9.26963	-10.0808	-9.48975	-2.05607	-5.26126	-5.40783	-1.90402	-0.996728	-11.2658	-5.62758	-5.5109	-6.85592	-7.55326	-8.32192	-7.72244	-9.38369	-13.4276	-10.5295	-10.9016	-10.5609	-2.65891	-5.97225	-16.7514	-13.7855	-7.41222	-3.76655
Pseudomonas mendocina ymp	-6.1062	-9.81823	-18.8176	-4.83873	-9.80473	-9.51026	-12.8691	-12.7553	-11.9243	-8.34239	-4.13986	-5.93267	-10.4465	-5.1082	-8.6129	-6.72542	-9.13253	-8.22756	-6.93555	-6.1372	-11.0883	-4.61716	-9.19946	-10.4012	-11.3748	-9.06557	-8.52424	-12.4248	-7.5016	-7.51608	-5.37698	-9.447	-8.72207	-6.83912	-10.0485	-7.38511	-11.8562	-9.08361	-9.96782	-10.6174	-14.4082	-12.7365	-11.6735	-5.75608	-9.21339	-17.5559	-8.56435	-7.82671	-4.32114
Pseudomonas putida F1	-8.70022	-4.22244	-20.1474	-4.00325	-4.15226	-7.77345	-13.728	-9.61529	-9.72083	-6.56774	-4.4743	-4.02985	-1.78164	-4.33981	-4.72685	-6.015	-6.23433	-6.38825	-6.05434	-3.57148	-7.84363	-3.67897	-6.77536	-7.32879	-8.23824	-7.79348	-2.79979	-6.86141	-5.95939	-2.21467	-5.69714	-7.21134	-8.6573	-11.6707	-7.93636	-5.96709	-5.57962	-6.88853	-6.66853	-11.0241	-8.85509	-8.64492	-10.0246	-4.2169	-3.60471	-16.6343	-8.07118	-5.48343	-5.54068
Pseudomonas stutzeri A1501	-3.57565	-7.43944	-20.6891	-5.67536	-8.46883	-8.25445	-11.2899	-12.0334	-12.2491	-8.26557	-3.84028	-5.86459	-15.3721	-4.88072	-7.498	-7.42742	-9.02776	-6.0508	-6.82602	-7.74206	-8.41103	-5.56396	-7.68409	-11.5768	-10.5826	-11.3859	-6.25804	-9.99301	-4.08194	-5.88165	-7.07124	-15.0407	-9.90281	-8.09384	-9.26939	-9.86005	-11.2144	-4.3758	-11.3419	-6.23994	-12.249	-12.2337	-14.5756	-8.32144	-6.83535	-14.6077	-12.3432	-12.5087	-8.11712
Pseudomonas syringae pv. syringae B728a	-6.56697	-7.13358	-15.8425	-3.96746	-7.07679	-9.71644	-4.30237	-3.41713	-2.5381	-5.2914	-5.39934	-5.00566	-7.46831	-1.28999	-5.70197	-6.95399	-7.21229	-5.35517	-7.02728	-7.47483	-6.67455	-2.66452	-4.6463	-7.12056	-7.04713	-6.6336	-2.74003	-6.76752	-5.85798	-2.05938	-7.62744	-6.7956	-10.4458	-8.48452	-6.73572	-7.83704	-9.4168	-10.7067	-10.5112	-13.934	-7.51489	-5.19284	-7.70888	-10.1158	-11.5197	-16.3908	-9.71884	-10.0929	-5.49173
Psychrobacter arcticus 273-4	-9.07103	-8.5999	-18.5618	-6.86671	-8.66072	-14.1998	-25.2171	-11.9374	-11.351	-14.0139	-8.23426	-5.49531	-11.6878	-3.29763	-8.77607	-6.55308	-9.37994	-6.64547	-10.2032	-6.16527	-12.6651	-3.48271	-9.27228	-9.92106	-10.6653	-9.1049	-3.32293	-8.7014	-4.33583	-5.50308	-4.90955	-15.5356	-13.4127	-12.7573	-14.0517	-8.19273	-17.8172	-18.6023	-18.9373	-18.2745	-13.133	-17.4396	-10.551	-18.7677	-15.4329	-22.9472	-12.7358	-11.7002	-6.53833
Psychrobacter cryohalolentis K5	-9.40185	-9.84085	-20.7653	-7.02663	-9.94496	-14.2722	-23.1357	-11.3128	-10.691	-13.2803	-8.01801	-5.62119	-10.3655	-5.15935	-11.0446	-4.89917	-11.6343	-11.0495	-10.4912	-5.25644	-13.3542	-4.01081	-8.58317	-8.81563	-10.6897	-8.99245	-4.29853	-12.5352	-4.45584	-5.05824	-4.92652	-14.6335	-13.2599	-11.6238	-14.8296	-8.6081	-18.4121	-18.2812	-20.554	-18.5964	-14.9044	-17.5675	-12.3428	-18.2668	-16.9558	-25.1518	-14.6285	-14.5879	-6.49453
Psychrobacter sp. PRwf-1	-10.0087	-10.4826	-20.1017	-6.7153	-7.57694	-15.9704	-24.2484	-9.89888	-9.28884	-17.5961	-9.78781	-5.59374	-8.85254	-3.91109	-8.71889	-7.51299	-10.3147	-9.66918	-8.17058	-4.93652	-12.854	-3.88104	-9.19663	-11.2495	-12.0864	-9.43307	-5.01798	-12.0121	-5.12472	-5.59395	-3.63144	-14.9896	-13.7092	-13.0714	-13.3003	-9.19283	-17.9416	-19.784	-20.0781	-16.219	-12.3618	-15.9119	-11.7968	-19.8365	-19.5246	-24.4963	-13.0474	-12.0051	-6.23046
Psychromonas ingrahamii 37	-6.72863	-8.80034	-12.9856	-6.36389	-6.88025	-7.80276	-6.91347	-4.95433	-4.22959	-4.5887	-7.35952	-2.78017	-12.8361	-3.47861	-6.26538	-3.8733	-5.81095	-6.68825	-7.61723	-5.09792	-9.32745	-3.47033	-6.85958	-9.27482	-6.29071	-7.2558	-2.79438	-5.21578	-4.39604	-5.85841	-4.54785	-10.0502	-7.62368	-8.90124	-7.05038	-11.0107	-10.1957	-9.26333	-10.3397	-5.6024	-10.5996	-11.1327	-10.99	-9.58172	-9.17195	-12.1186	-12.5894	-12.651	-10.7613
Ralstonia eutropha H16	-8.56935	-5.77762	-16.2389	-6.23721	-6.61481	-10.1206	-20.6258	-8.99281	-7.97725	-9.37934	-6.96329	-6.23685	-3.06388	-6.6352	-6.89626	-7.3619	-9.38242	-7.5738	-6.2567	-5.19109	-6.93852	-3.7918	-6.61481	-6.68022	-7.43736	-7.78018	-4.16185	-5.42657	-4.59864	-2.19802	-6.12001	-9.27193	-12.0607	-13.8785	-11.266	-8.81025	-13.6515	-13.0953	-13.7009	-13.6054	-9.34535	-13.0209	-6.29891	-9.84614	-11.1266	-19.251	-9.60773	-7.35495	-3.87184
Ralstonia metallidurans CH34	-10.4068	-4.67684	-16.8338	-8.1919	-5.5316	-9.05847	-19.0685	-10.7233	-9.73343	-9.0407	-7.87175	-5.19012	-8.60231	-5.58373	-5.86215	-8.30325	-7.35275	-5.54204	-4.21366	-2.07663	-8.73514	-2.76729	-5.45826	-11.4294	-9.22034	-6.60372	-5.0976	-4.32604	-2.48242	-6.01894	-4.04521	-13.6483	-10.7953	-14.6538	-11.0147	-11.653	-10.4496	-12.8667	-15.5066	-15.4964	-18.8399	-16.3259	-14.8426	-10.7321	-10.0326	-20.9447	-9.09942	-9.77077	-6.80676
Ralstonia pickettii 12J	-9.44839	-5.05363	-12.5745	-4.93517	-5.00845	-11.6647	-16.9278	-8.24342	-6.37751	-9.04611	-7.33261	-5.98538	-0.19649	-3.24462	-4.67962	-6.89779	-5.1924	-6.32437	-7.00353	-3.38844	-6.52388	-1.65202	-5.53137	-9.93527	-9.87571	-10.4896	-2.68586	-6.68206	-0.767071	-6.92043	-5.56437	-7.43579	-10.2584	-11.3186	-10.5579	-5.72107	-10.2722	-9.54553	-11.3713	-11.8534	-5.22009	-4.80278	-7.43432	-12.0248	-8.44272	-18.1748	-5.41252	-4.75497	-7.44812
Ralstonia solanacearum GMI1000	-9.58711	-8.14708	-17.8883	-3.9729	-10.0883	-12.7251	-16.3664	-9.44688	-9.56556	-10.3331	-5.41067	-6.00921	-4.51512	-7.2976	-5.70575	-8.96335	-9.21564	-7.36027	-6.03134	-4.48947	-8.70012	-3.66668	-7.66581	-9.15203	-11.0761	-11.6579	-7.74914	-6.78185	-3.87335	-7.08291	-4.63806	-6.85764	-11.4777	-9.51268	-11.766	-5.85671	-11.4414	-13.7341	-14.535	-12.9477	-10.5657	-11.2602	-8.7561	-11.1312	-12.5326	-17.4275	-5.77153	-6.15118	-6.49913
Renibacterium salmoninarum ATCC 33209	-7.66447	-6.75024	-7.86088	-7.33719	-5.83303	-11.7663	-12.7402	-6.87575	-6.1549	-8.46396	-6.32296	-3.77468	-7.72727	-2.44628	-9.24446	-8.82744	-11.7912	-9.65627	-9.59873	-10.0485	-8.24532	-6.46237	-5.79704	-6.17703	-12.1919	-10.1684	-6.75738	-10.1524	-7.34344	-8.78067	-7.50656	-6.91004	-12.5281	-11.8108	-9.95919	-9.94575	-14.1188	-15.1798	-11.2635	-12.5522	-6.48306	-7.98581	-6.8769	-13.5234	-13.1186	-12.0069	-10.4649	-7.52062	-8.73246
Rhizobium etli CFN 42	-0.19835	-4.5456	-4.32366	-3.13549	-5.42294	-3.97713	1.63645	-6.38587	-6.42671	-5.60557	0.245575	-3.13627	-3.03496	-2.51523	-3.82068	-5.22406	-5.31664	-3.49978	-2.16274	-3.92886	-4.47318	-1.73857	-6.25708	-4.10588	-2.93666	-1.37166	-3.01295	-4.1941	-1.33092	-4.78556	-1.94634	-1.88495	-6.45669	-5.36462	-4.69407	-3.45116	-1.19164	-1.57551	-1.25833	-0.357288	-4.21993	0.519686	-2.2791	-4.58346	-5.90992	-1.55456	-1.47118	-0.0549229	-2.72612
Rhizobium leguminosarum bv. viciae 3841	4.18697	-7.92653	1.14146	-3.30867	-6.73782	-2.21203	3.52703	-7.40763	-7.3507	-3.88504	3.89917	-3.31617	-3.78983	-2.70945	-3.95161	-4.44538	-5.43059	-3.62038	-2.32826	-0.361637	-9.24191	-1.8329	-4.84907	-7.0532	-8.75546	-6.03721	-2.25563	-7.57461	-2.76963	-2.46124	1.77151	2.74227	-5.46094	-4.21417	-5.64467	-5.04598	-1.95587	-0.440776	1.00568	2.22906	-1.14214	2.87292	-3.01296	-5.01484	-5.2656	4.28573	-3.40177	-2.27665	-2.97455
Rhodobacter sphaeroides ATCC 17029	-7.58068	-8.44312	-17.6995	-5.67701	-7.47214	-5.25698	-13.3046	-9.04005	-8.25536	-9.27571	-4.84313	-5.86517	-9.38182	-5.88297	-4.49918	-5.43043	-6.02884	-2.05265	-5.82711	-5.74585	-6.41747	-4.56447	-6.68899	-8.58465	-7.59017	-7.3925	-4.26066	-10.9973	-5.08596	-6.88771	-4.07423	-9.05342	-8.91052	-8.10093	-9.27673	-8.86506	-5.22049	-6.38248	-9.34789	-8.2436	-13.2595	-11.2472	-10.5856	-8.32568	-8.83907	-12.6166	-11.3543	-10.5206	-6.11912
Rhodococcus sp. RHA1	-5.51836	-8.34776	-8.72371	-7.55954	-5.09395	-7.47504	-15.9707	-3.67543	-4.47822	-12.3125	-7.50264	-0.630611	-3.13097	-2.90892	-6.15952	-6.66655	-9.61341	-9.76226	-8.60639	-6.84953	-9.10507	-3.9944	-9.52176	-9.09493	-8.618	-9.72667	-6.51497	-6.00329	-7.2389	-4.17662	-5.51891	-9.47837	-8.62782	-6.17444	-8.7485	-4.73258	-10.8486	-11.4593	-9.86504	-6.2838	-7.72783	-7.80849	0.714247	-10.4959	-9.66911	-11.0856	-9.91317	-13.2669	0.670373
Rhodoferax ferrireducens T118	-6.9184	-5.68606	-11.4121	-2.78313	-3.68867	-4.42203	-5.30164	-3.49518	-2.68171	-7.9591	-3.03394	-4.90689	-7.0547	-5.02989	-3.57417	-5.62425	-4.09744	-5.16894	-5.89776	-5.9981	-2.84875	-2.59841	-6.01713	-5.10881	-3.09627	-4.82789	-5.43218	-6.27669	-2.35409	-1.29238	-2.27082	-5.93285	-5.43039	-2.57553	-5.77126	-6.19985	-3.6286	-7.83197	-5.74636	-9.48552	-10.985	-13.1852	-9.27426	-6.60475	-6.08277	-8.21879	-7.11983	-5.34445	-4.25016
Rhodopirellula baltica SH 1	-14.8912	-8.97378	-20.0602	-3.33277	-7.77698	-10.2411	-23.7472	-10.5433	-9.47239	-16.0463	-6.14502	-7.34428	-17.0315	-4.73256	-6.97071	-5.47114	-5.44724	-6.63526	-6.35333	-9.41606	-8.33873	-0.847372	-8.92402	-10.1718	-9.85545	-7.11763	-6.28511	-6.62164	-6.82357	-8.54413	-8.26234	-25.5873	-18.5898	-18.3214	-19.7665	-14.1216	-10.0539	-9.55226	-15.089	-12.8248	-20.4079	-24.499	-19.2497	-12.0684	-11.3099	-20.8639	-26.6646	-25.5842	-7.00911
Rhodopseudomonas palustris BisA53	-6.38165	-6.00826	-20.4249	-4.91677	-3.96948	-7.63523	-17.7188	-9.14671	-9.28795	-7.90836	-5.29504	-5.97446	-8.0463	-5.21865	-8.6669	-2.86537	-7.18105	-7.30644	-7.99025	-4.33967	-2.43901	-4.6451	-6.46667	-3.83102	-5.77872	-6.40785	-5.65495	-9.63315	-6.71565	-5.84193	-5.52845	-15.2373	-12.1533	-13.2252	-12.4581	-8.6557	-8.19088	-10.4551	-13.2926	-16.8077	-11.0573	-12.5881	-9.28234	-12.9731	-10.3988	-20.0536	-14.243	-15.5686	-5.42352
Rhodospirillum rubrum ATCC 11170	-7.1885	-3.15252	-16.8966	-3.54188	-4.20784	-4.05474	-8.18267	-6.53001	-5.77496	-5.49232	-3.62096	-2.82295	-10.6457	-2.70272	-2.4008	-2.18606	-3.93778	-4.89834	-3.73766	-5.4496	-6.91597	-3.52333	-4.30749	-0.979284	-1.99539	-1.87542	-6.05193	-7.65136	-2.77054	-5.41495	-2.83716	-14.0966	-10.314	-6.54904	-11.7086	-10.4735	-7.74807	-8.86491	-6.88444	-7.95421	-11.4679	-14.2335	-11.8281	-11.9903	-5.54145	-13.9236	-10.5147	-12.6261	-5.9599
Rickettsia akari str. Hartford	-15.5658	-8.92471	-22.6843	-10.5172	-11.9048	-14.5509	-26.7226	-13.5672	-14.0536	-20.3109	-12.4722	-6.28487	-14.7611	-6.22237	-13.4482	-9.00035	-12.7931	-10.6632	-12.2102	-11.3524	-14.0632	-6.07507	-11.772	-11.9456	-12.4136	-10.1785	-6.72309	-15.0002	-8.66748	-13.6925	-9.2894	-20.4982	-17.4169	-16.5393	-17.2366	-15.2363	-15.3169	-15.9139	-18.3551	-18.9582	-16.9834	-20.427	-16.204	-15.9254	-16.162	-24.7269	-18.3813	-17.4909	-11.2066
Rickettsia bellii RML369-C	-17.6774	-10.1292	-24.3314	-13.8789	-12.0826	-16.8313	-28.6617	-16.6319	-17.1029	-22.8357	-13.1709	-7.08959	-14.9164	-6.96734	-11.9751	-11.0283	-14.4297	-14.1138	-12.8742	-12.3033	-15.4254	-7.98915	-12.8926	-11.3599	-13.8478	-13.5398	-7.62091	-16.6144	-8.54338	-14.8043	-9.18273	-22.8986	-18.8701	-18.0553	-18.6522	-15.4778	-17.6947	-18.3288	-21.7456	-20.3734	-18.1843	-21.8095	-17.4674	-16.4574	-18.8323	-27.4801	-19.6012	-19.6647	-11.3812
Rickettsia canadensis str. McKiel	-14.3515	-7.58935	-20.8961	-11.1739	-9.66473	-14.0753	-25.6924	-13.3917	-13.8965	-18.7331	-11.6946	-6.48772	-13.5104	-4.44905	-12.0996	-9.00746	-12.3246	-11.2737	-11.8244	-10.3124	-11.593	-5.25145	-10.5392	-10.4428	-10.9407	-9.78833	-5.76593	-13.3568	-7.74114	-12.54	-9.33571	-17.9916	-15.8403	-13.9001	-15.6965	-14.8715	-12.7909	-15.3505	-17.8289	-17.3591	-15.6875	-18.9459	-15.8313	-14.2074	-14.2931	-24.8278	-17.0918	-17.2551	-10.9209
Rickettsia conorii str. Malish 7	-16.3318	-9.75711	-23.8173	-12.4471	-12.7136	-15.4413	-29.0496	-15.3013	-15.777	-22.353	-12.9549	-7.42393	-14.5551	-5.73278	-13.4766	-10.6977	-13.8986	-11.6489	-13.323	-12.008	-15.0002	-6.69479	-13.5449	-14.9161	-13.3933	-12.108	-7.3405	-16.1038	-9.26841	-14.4529	-9.90356	-21.4597	-18.4169	-18.5824	-18.2112	-16.0927	-15.2681	-17.8902	-20.314	-18.9392	-17.8083	-21.3755	-17.0727	-14.986	-16.3189	-25.9332	-19.2169	-18.2943	-11.019
Rickettsia felis URRWXCal2	-16.175	-8.65991	-25.0753	-12.506	-12.6162	-15.3787	-29.5582	-13.1081	-12.5721	-21.5443	-12.4797	-8.0815	-16.4411	-7.3083	-13.7174	-10.519	-13.2147	-11.7972	-13.7042	-12.7277	-15.0397	-6.41783	-12.3918	-14.0053	-12.5149	-10.1741	-7.02516	-16.3593	-9.94294	-13.3188	-9.5858	-21.5377	-19.5248	-18.7381	-18.2887	-16.0302	-15.3062	-16.9583	-19.3656	-18.9878	-18.7311	-22.4425	-17.0395	-15.1269	-16.5599	-26.27	-20.1635	-20.2079	-13.8941
Rickettsia massiliae MTU5	-13.4485	-6.59116	-19.564	-9.31795	-9.79099	-11.9397	-25.2327	-11.4997	-11.0206	-16.6161	-11.1059	-4.30958	-12.5756	-4.91066	-10.343	-8.36674	-10.492	-7.40766	-10.0994	-9.5408	-11.5127	-5.79516	-9.61599	-10.3527	-10.9118	-7.82514	-5.08123	-12.2411	-7.07568	-11.7261	-7.64946	-17.8716	-14.6718	-14.6936	-14.5521	-12.8529	-11.6394	-14.1718	-16.6902	-16.1465	-14.7217	-17.8483	-13.8025	-11.9109	-11.8962	-22.4245	-16.1513	-15.3559	-8.99747
Rickettsia prowazekii str. Madrid E	-13.1992	-5.21621	-17.7016	-9.36334	-8.67162	-10.3404	-22.2707	-10.2244	-10.7736	-16.1457	-10.2759	-6.23241	-10.2552	-3.22825	-10.6105	-8.62082	-9.68114	-7.4576	-9.4485	-8.47987	-9.03763	-5.36929	-8.32898	-4.88138	-8.58471	-6.59718	-4.18704	-9.87262	-4.19174	-10.6622	-7.74329	-14.2982	-14.0554	-12.0437	-12.965	-12.4418	-11.0192	-11.5119	-15.1115	-13.4577	-13.3616	-16.3098	-12.3468	-10.1095	-11.9908	-20.4928	-14.8606	-15.1227	-7.81327
Rickettsia rickettsii str. Iowa	-16.3956	-8.82599	-24.9121	-12.5264	-12.7816	-15.5139	-29.162	-15.3623	-15.8372	-21.4416	-12.9949	-8.54189	-16.6216	-5.77592	-13.5673	-10.7581	-13.9954	-12.734	-13.4228	-12.0625	-16.0786	-6.74868	-11.6092	-12.9978	-14.4767	-10.1871	-7.39222	-16.1976	-10.319	-14.5174	-9.95503	-20.5404	-18.5005	-17.6696	-18.2925	-16.1639	-15.347	-16.9712	-20.3937	-19.0198	-17.8775	-21.4554	-17.1455	-16.0734	-17.4141	-27.0341	-19.2875	-19.3623	-11.0862
Rickettsia typhi str. Wilmington	-12.2261	-5.24557	-16.742	-8.38104	-8.69445	-10.3749	-22.3122	-9.25245	-10.8009	-16.1764	-10.294	-5.23328	-11.2841	-3.24208	-10.6229	-7.63516	-9.69489	-7.47507	-9.45899	-8.50256	-10.0691	-5.37628	-8.35676	-5.91256	-8.61203	-7.62226	-4.20551	-10.8998	-4.21026	-10.6843	-7.76216	-16.3325	-13.0901	-12.0789	-12.9992	-11.4721	-10.0544	-12.548	-15.1454	-13.494	-13.3913	-16.3433	-11.3787	-10.1481	-12.0311	-19.5342	-14.8883	-15.1492	-7.83726
Roseiflexus castenholzii DSM 13941	-2.81901	-2.61527	-1.20027	-4.75277	-3.626	-3.37431	-2.00514	-6.3596	-6.55495	-3.75718	-1.97783	-1.89403	-7.85262	-0.987457	-2.55289	-3.56881	-2.07805	-3.13622	-2.87741	-2.92415	-5.7219	-1.58849	-3.9206	0.0456841	0.0519977	-3.70079	-1.3825	-0.196224	-1.27555	-4.17359	0.786285	-4.66826	-0.276788	-0.435935	2.3748	-2.10155	-0.508358	-2.6993	0.370858	-2.41499	-3.76694	-4.90239	-5.06783	-0.523552	-3.01224	-6.04104	-4.89018	-8.09643	0.787907
Roseiflexus sp. RS-1	-3.02577	-2.76188	-3.64309	-3.81518	-4.7554	-3.47278	-4.62491	-7.64325	-7.81992	-5.17796	-3.09451	-1.92138	-10.277	-0.0749597	-3.59653	-3.68267	-3.11774	-4.20296	-1.91945	-5.07773	-5.98572	-2.60912	-3.12139	-1.27593	-1.25576	-4.96418	-1.4851	-3.36201	-2.43857	-5.42041	-0.331795	-6.22447	1.40309	-0.72626	2.07044	-1.30585	-3.75864	-3.97568	-1.87298	-3.56113	-5.22511	-9.49764	-3.50101	-1.6916	-3.15786	-5.41133	-10.3722	-9.61793	-0.290878
Roseobacter denitrificans OCh 114	-8.57691	-10.4404	-16.6917	-5.67577	-10.4697	-9.25508	-10.2936	-10.035	-9.25066	-11.2681	-6.841	-9.86474	-14.3745	-6.88128	-8.49829	-7.42817	-9.02803	-9.05126	-8.82629	-11.743	-12.4126	-4.56409	-10.6853	-12.5788	-12.5845	-8.38757	-8.2587	-13.9941	-7.08295	-4.88317	-5.07199	-11.0439	-10.9047	-11.0956	-10.2712	-10.8613	-12.2159	-12.3775	-14.3434	-6.24086	-13.2517	-17.2371	-16.5781	-10.3225	-12.8363	-11.6099	-14.346	-17.5117	-9.11762
Rubrobacter xylanophilus DSM 9941	7.026	1.80352	2.44728	-2.01711	-1.30187	-4.3537	-1.92982	-3.05402	-2.37055	-0.142652	5.07193	0.278478	6.38883	0.917355	-3.98158	-3.30073	-4.54157	-5.26756	-2.36549	0.488599	-2.36161	0.635445	-0.123231	-4.13297	0.875932	-5.21489	1.65699	-4.43122	4.22688	-2.94427	-5.04877	5.52105	4.48924	1.16242	3.0128	2.7577	3.70816	4.71349	4.55812	3.00598	4.70953	8.50584	9.28752	-1.87561	-2.51677	0.185919	2.81168	7.80569	3.59789
Saccharophagus degradans 2-40	-13.4188	-9.32424	-12.365	-6.62291	-8.3647	-11.1749	-17.8368	-12.8272	-12.0552	-10.9509	-9.75149	-6.84701	-11.0724	-4.80979	-9.46022	-6.33205	-10.9929	-6.99156	-8.79136	-8.62396	-14.2105	-2.54781	-11.5315	-8.33425	-9.34543	-8.18041	-5.17572	-11.8573	-4.95623	-6.69282	-7.97747	-11.6505	-15.6633	-12.8732	-14.0414	-11.7038	-17.0253	-19.1683	-20.1567	-15.1253	-14.9265	-16.8195	-12.2677	-16.1887	-14.7181	-19.3297	-14.0016	-14.1437	-9.0544
Saccharopolyspora erythraea NRRL 2338	-4.83659	-2.9408	-0.919215	-7.31587	-5.74964	-4.2208	-6.55554	-6.44842	-6.3873	-8.93374	-5.11415	-2.3245	-0.862251	-1.71645	-8.9573	-6.4532	-10.4355	-9.62487	-7.3357	-9.37806	-7.27113	-3.83719	-5.87168	-11.089	-11.7857	-10.0616	-5.26455	-9.58881	-5.78595	-4.48632	-6.23875	-1.3564	-5.49977	-6.24654	-4.6814	-3.06879	-10.9854	-8.47436	-6.02284	-6.78713	-2.22176	0.761679	-1.08395	-9.03102	-6.27896	-7.75933	-2.48061	-0.368771	-1.98488
Salinibacter ruber DSM 13855	-7.27882	-8.61273	-15.291	-3.62737	-4.72593	-6.90008	-3.2002	-2.26483	-1.61202	0.148104	-2.52763	-4.67579	-9.5747	-6.68941	-9.63323	-4.71264	-11.2068	-9.78823	-10.0492	-4.96159	-3.4728	-4.23575	-4.44329	-9.09778	-10.0454	-9.23771	-5.89746	-4.63417	-3.19281	4.89438	-3.56502	-14.1601	-8.50508	-6.85796	-9.02439	-5.52508	-8.46061	-6.39573	-11.6101	-10.398	-8.18699	-12.1315	-10.6231	-11.1867	-7.85907	-18.6283	-10.0044	-9.98058	-4.0291
Salinispora arenicola CNS-205	-6.41706	-8.03237	-14.5042	-3.92656	-5.99021	-9.65093	-18.8296	-5.19794	-5.3354	-16.9814	-2.31498	-2.98021	-11.1258	-5.23247	-10.6737	-9.88265	-8.18709	-12.316	-10.9973	-8.36556	-4.48406	-4.64876	-5.50101	-7.88634	-6.83023	-8.45129	-5.67139	-11.6592	-0.74296	-7.88361	-6.54755	-12.3423	-6.20906	-7.27478	-8.51102	-8.6904	-11.234	-13.5031	-9.33437	-8.83199	-11.1434	-7.70159	-11.3628	-13.0006	-12.4222	-15.1179	-9.3327	-14.6672	-8.43659
Salinispora tropica CNB-440	-7.04586	-7.77599	-13.6866	-6.8211	-5.76777	-8.48218	-18.6857	-6.67115	-5.84593	-14.219	-6.10584	-2.92416	-14.3191	-6.08331	-12.6006	-10.6934	-10.1215	-13.2092	-10.9235	-8.0926	-9.01134	-5.61113	-9.14089	-6.30722	-6.28553	-7.98957	-6.49492	-10.3778	-5.45434	-8.44432	-5.34312	-12.2797	-7.62814	-7.75446	-7.95924	-9.32566	-12.783	-14.0026	-8.89667	-10.5752	-13.2706	-11.5569	-13.5439	-12.7078	-18.1718	-14.4474	-8.41998	-9.66976	-6.29846
Salmonella enterica subsp. enterica serovar Typhi str. Ty2	-2.80516	-1.60536	4.82911	1.25152	-0.617194	-5.36761	-0.964016	-2.34082	-1.53737	-2.72909	-4.97001	1.10772	-0.824735	-0.98149	0.450127	1.43903	4.9247	-0.131557	-1.87455	-0.91382	2.29578	-0.5871	1.09286	-0.932798	-2.92729	0.316998	-0.37552	3.81511	-0.26458	1.84299	-2.20571	0.36822	-3.25542	0.583526	-0.604876	1.91216	-3.49161	-6.68083	-7.6128	-3.40511	1.26314	-3.86343	4.96069	-2.51217	-1.00233	-10.0163	5.14153	0.937763	-1.20676
Salmonella typhimurium LT2	-2.03425	-0.767839	5.33858	0.182316	-2.76063	-3.47675	-2.65057	-0.655019	0.169107	-1.19528	-5.09929	1.07745	-1.29479	0.921515	0.401727	3.31278	2.88069	0.794412	-0.921151	-1.08401	0.00347037	0.390034	1.87038	-1.28913	-1.26833	1.0251	-1.48925	1.63132	-0.445229	0.569498	-3.33658	1.75224	-3.61009	-0.73816	0.0579176	1.68579	-4.76892	-5.98705	-7.88297	-3.56708	2.75573	-4.52263	2.48091	-3.69842	-1.16375	-9.42656	3.60763	2.36022	-2.29408
Serratia proteamaculans 568	-5.43948	-2.04759	-3.55445	-2.93272	-1.00327	-6.66082	-4.89988	2.76953	3.63447	-3.02772	-6.3276	-1.98391	-1.17633	-1.24117	-2.67793	-2.8935	-5.1909	-2.322	-4.00175	-1.38194	-5.51256	-0.651091	-1.52274	-3.92136	-1.86279	-2.47871	-2.68175	-0.675567	-3.76022	2.09004	-3.5596	-3.40914	-9.24438	-7.30616	-9.54456	-6.71235	-2.26132	-0.533452	-2.36081	-4.8473	-5.19824	-5.77393	-2.41394	0.98208	0.563108	-7.15863	-2.38978	0.270059	-5.44484
Shewanella amazonensis SB2B	-13.8916	-9.92658	-21.305	-7.42962	-10.9986	-9.89394	-22.3579	-10.1558	-9.42085	-12.9071	-9.45232	-3.79461	-15.1171	-7.55959	-9.31619	-9.98738	-11.8587	-10.7665	-9.66223	-6.22311	-12.5361	-5.48988	-10.0184	-11.5238	-10.5412	-9.47693	-6.88724	-13.3739	-7.52931	-7.05586	-5.65175	-14.4126	-14.8673	-13.1309	-17.2828	-12.1752	-13.3913	-14.476	-16.533	-13.7287	-14.9006	-20.513	-14.2814	-14.7285	-15.3055	-24.403	-15.9106	-14.9883	-6.83332
Shewanella baltica OS155	-12.9959	-6.74083	-21.5785	-7.80633	-11.7369	-13.4587	-25.5346	-9.60184	-9.78129	-14.1169	-9.07764	-2.91728	-15.2147	-5.06248	-7.59037	-8.66655	-9.11215	-8.19362	-5.91343	-9.05558	-11.9476	-5.60613	-9.09235	-14.2294	-11.2114	-11.9263	-6.47044	-9.33842	-7.41508	-6.38478	-3.31489	-17.1426	-15.5505	-13.6843	-16.8854	-14.2763	-13.7224	-14.9356	-16.8377	-14.5401	-19.1577	-19.4099	-16.4375	-11.6675	-14.1371	-25.3576	-18.3015	-17.5412	-9.27958
Shewanella denitrificans OS217	-12.0603	-10.0555	-24.6394	-7.49451	-12.1184	-13.9861	-23.8239	-11.3672	-10.621	-11.2387	-10.5482	-4.81036	-13.4145	-6.64159	-8.36544	-7.10167	-10.9048	-12.843	-9.70602	-6.352	-16.7519	-4.50918	-12.1827	-16.7822	-15.7996	-14.704	-6.98149	-14.5332	-9.66657	-5.25993	-6.75768	-15.7971	-18.1205	-16.3685	-16.5242	-12.3449	-14.5939	-17.6966	-18.7327	-14.8575	-15.2197	-19.9176	-15.5892	-13.8781	-14.4407	-23.6983	-15.2506	-16.3467	-9.90591
Shewanella frigidimarina NCIMB 400	-14.448	-11.3458	-22.4249	-8.63283	-12.3842	-11.1898	-22.9206	-11.8653	-11.0911	-13.0093	-10.768	-4.85021	-15.1276	-7.82311	-7.4674	-8.35004	-8.99955	-10.0028	-9.79791	-9.64598	-14.2478	-4.55084	-9.55992	-14.3793	-13.3896	-12.2188	-7.19116	-13.8828	-7.97966	-7.72798	-7.99503	-17.7223	-16.7078	-12.9142	-19.0837	-13.7329	-16.0604	-15.2068	-16.1911	-17.1467	-16.9859	-22.8956	-15.3244	-16.2135	-15.7401	-25.3813	-15.0645	-16.2108	-9.06616
Shewanella halifaxensis HAW-EB4	-13.7585	-11.5718	-19.0721	-7.73393	-10.5874	-15.3449	-24.8257	-12.2777	-11.4782	-17.6345	-9.94363	-2.88644	-14.7312	-6.96127	-8.53961	-9.53437	-11.0659	-10.1157	-10.8648	-8.87897	-17.6446	-4.58242	-11.8618	-13.8603	-15.8574	-12.6229	-7.3519	-12.1465	-8.22754	-9.10107	-5.17861	-19.5095	-16.1834	-12.3508	-16.5364	-14.0416	-17.4351	-18.6186	-18.5577	-15.3717	-16.636	-22.7329	-16.9436	-15.4737	-13.9688	-20.933	-16.7521	-16.9476	-9.1887
Shewanella loihica PV-4	-13.2144	-8.17196	-19.9488	-6.55123	-11.2257	-12.0684	-25.2555	-12.5631	-11.8062	-14.5436	-9.63563	-3.82556	-14.6929	-5.71492	-7.40773	-7.20281	-9.94423	-10.9092	-8.74388	-8.46925	-15.9491	-5.52614	-9.33266	-12.0191	-13.0348	-10.9099	-7.06601	-12.6749	-8.79146	-8.44619	-5.85307	-16.1577	-17.3531	-16.5854	-18.7459	-12.4994	-15.7792	-15.8989	-16.915	-14.9736	-16.5186	-22.2981	-14.8767	-13.0128	-13.5616	-26.9691	-17.5685	-16.6832	-9.97066
Shewanella oneidensis MR-1	-11.9721	-11.7241	-21.5274	-8.79925	-9.72218	-13.4475	-25.463	-10.569	-10.7507	-17.0685	-9.06424	-4.91405	-16.1654	-5.05253	-7.58544	-7.65367	-10.1077	-10.1861	-8.90864	-8.03797	-11.9173	-5.60376	-10.0693	-14.1924	-14.1762	-10.8962	-6.45875	-12.3196	-7.3964	-9.35647	-7.30142	-18.078	-19.5136	-15.6509	-21.8504	-13.2529	-17.6936	-16.9038	-18.8097	-16.5234	-18.1045	-23.3406	-17.3872	-15.6483	-15.1205	-27.315	-20.2455	-20.4805	-10.2706
Shewanella pealeana ATCC 700345	-13.7145	-7.5402	-21.9794	-7.72009	-10.5592	-14.3234	-25.6961	-13.2185	-12.4228	-17.5456	-9.91879	-2.88105	-15.6438	-5.94211	-8.52983	-9.50907	-12.057	-10.1005	-7.85564	-8.84612	-15.5884	-4.57801	-10.8191	-13.7921	-12.7915	-11.5662	-5.32954	-12.11	-6.19262	-7.04838	-4.15299	-20.3953	-16.1158	-13.2891	-17.4721	-13.998	-18.382	-18.5601	-19.5058	-15.3402	-17.5418	-21.6112	-16.8542	-15.4373	-14.937	-23.8546	-17.6527	-18.8407	-10.1716
Shewanella putrefaciens CN-32	-12.3717	-9.2894	-25.2686	-9.60675	-11.333	-14.1506	-24.7021	-10.7659	-10.9975	-13.8569	-9.72484	-4.84193	-15.984	-6.7882	-7.44848	-7.3028	-9.98204	-7.97313	-6.78068	-8.58843	-15.1503	-4.54289	-10.4858	-15.2616	-14.2741	-11.1184	-8.15071	-12.8159	-7.91839	-9.6361	-5.94905	-19.5356	-17.5917	-14.8069	-16.9732	-14.6568	-13.9686	-17.1061	-18.1011	-15.0906	-15.8314	-22.6977	-17.1767	-17.1485	-17.6825	-25.2465	-18.9007	-18.0362	-10.0353
Shewanella sediminis HAW-EB3	-14.0044	-7.74688	-22.597	-6.80887	-11.7422	-14.4628	-26.5605	-13.6137	-12.7924	-12.1344	-9.08248	-4.91845	-16.2325	-6.06607	-7.59214	-8.67119	-11.1138	-11.1963	-6.91516	-8.06194	-13.9585	-3.60699	-11.1007	-14.2427	-15.2241	-11.9372	-7.47465	-11.3452	-9.42183	-9.39501	-7.31974	-22.1661	-16.5638	-14.6963	-17.8981	-13.2848	-20.7328	-19.9471	-19.8478	-16.5462	-19.177	-23.435	-17.4557	-16.6744	-16.143	-24.373	-20.3217	-20.5631	-10.2828
Shewanella sp. ANA-3	-11.8533	-9.63978	-20.2732	-7.76333	-9.64773	-11.3909	-27.1072	-11.4063	-11.5986	-15.8268	-7.99721	-3.89841	-12.922	-3.00218	-6.5603	-9.5881	-9.08482	-6.14765	-5.88447	-8.9497	-11.7657	-4.59191	-9.95393	-13.0076	-12.9993	-10.7448	-5.39972	-9.22417	-4.3027	-9.21463	-7.2335	-14.759	-17.3298	-15.4841	-17.6756	-15.1355	-13.5499	-15.7451	-16.6696	-13.4394	-15.8418	-22.9994	-14.1387	-15.5517	-14.0367	-25.1024	-16.969	-17.1815	-9.22528
Shewanella sp. MR-4	-11.3059	-6.24046	-19.1344	-6.58382	-9.28842	-11.1165	-25.5146	-11.6807	-10.9172	-12.7256	-8.68755	-2.83497	-14.8614	-4.75775	-8.43172	-8.26139	-8.96651	-6.94683	-7.7655	-8.53866	-9.06616	-4.53594	-8.42175	-10.1601	-12.1741	-9.03141	-5.11548	-8.75738	-3.86538	-8.55672	-7.90909	-13.3763	-17.4918	-14.7143	-17.878	-14.5911	-11.8893	-13.0194	-15.0233	-14.0418	-14.6996	-20.5292	-15.0504	-13.092	-13.6322	-24.1304	-15.7609	-15.8874	-9.00846
Shewanella sp. MR-7	-12.4281	-8.33112	-18.3841	-8.62608	-9.37095	-12.1797	-26.8635	-10.8393	-10.0667	-14.9695	-8.75677	-2.84803	-14.09	-3.81405	-7.46252	-8.33781	-8.99504	-7.99518	-6.79345	-8.63099	-10.2224	-4.54878	-8.5406	-11.3486	-12.3595	-10.1927	-5.18065	-8.86547	-3.96371	-8.70405	-6.98308	-14.6734	-17.6775	-15.8863	-18.0549	-14.7131	-13.0365	-15.1806	-17.1677	-14.1321	-13.9454	-19.8438	-14.2858	-14.1966	-13.7252	-25.3462	-17.0217	-16.1651	-9.05816
Shewanella sp. W3-18-1	-12.4677	-9.36031	-24.4656	-9.63949	-11.3974	-14.1999	-23.9774	-10.8911	-12.1154	-14.0488	-9.77919	-4.85238	-16.165	-6.83208	-7.47222	-7.36214	-9.00399	-7.01039	-6.80231	-9.66084	-15.273	-4.55288	-10.5791	-15.4098	-14.4195	-10.2447	-7.20156	-12.9	-6.99549	-8.75174	-6.00687	-19.771	-17.7378	-13.942	-18.1124	-13.7525	-14.0842	-17.2329	-18.2144	-15.1612	-15.0262	-22.9473	-16.3629	-17.2303	-16.7549	-25.4163	-19.1072	-18.2563	-10.0741
Shigella boydii Sb227	-8.76316	-8.57523	-3.08201	-4.7354	-4.5904	-9.34719	-8.83964	-4.28402	-4.48419	-3.644	-7.94629	-1.88702	-5.74058	-3.96332	-2.54066	-4.53706	-5.06688	-3.11729	-4.86583	-4.88248	-6.65059	-1.58289	-3.86634	-4.86758	-4.86442	-1.62897	-3.35429	-4.15036	-6.23128	-2.10671	-4.18135	-11.5217	-11.1907	-9.35746	-12.5433	-7.04623	-12.4408	-12.6249	-13.5633	-11.3751	-5.64611	-11.746	-5.95323	-8.47758	-7.97217	-16.9414	-10.7628	-12.9591	-7.19053
Shigella dysenteriae Sd197	-8.00979	-8.75064	-10.6086	-4.81046	-6.74553	-10.4653	-11.5766	-5.62111	-5.79927	-8.14535	-9.0855	-2.91918	-8.24369	-4.0683	-4.59324	-5.67407	-5.11476	-7.19798	-6.91624	-5.0659	-6.96534	-2.60752	-2.10588	-7.25105	-7.23208	-5.94397	-4.47727	-5.34942	-5.42603	-4.40138	-5.32277	-12.1807	-12.5721	-12.7038	-11.906	-7.29009	-13.7393	-11.9543	-13.8541	-8.54992	-8.18907	-11.4507	-6.46702	-11.6787	-12.1468	-17.3826	-8.33439	-10.5769	-5.28484
Shigella flexneri 2a str. 2457T	-3.48987	-6.37663	-3.51134	-4.64694	-4.41217	-5.21116	-1.0414	-1.92025	-2.14277	-0.093293	-4.79175	-1.85485	-4.20727	-1.84214	-1.47759	-3.37569	-4.00896	-2.01883	-3.80724	-2.67756	-4.30139	0.444829	-2.60069	-5.44412	-3.45305	-1.27379	-2.21323	-3.91927	-4.01329	-1.77846	-3.02015	-4.82603	-6.77171	-5.97319	-6.1446	-1.77466	-11.111	-8.26223	-8.24065	-6.17742	-5.07163	-4.0057	-2.40635	-5.2491	-7.77156	-7.45557	-3.15541	-3.3078	-5.08298
Shigella sonnei Ss046	-3.97645	-8.72714	-0.536719	-2.80055	-3.72487	-6.44957	-1.47603	-4.57502	-3.75627	-4.07733	-6.06669	-1.91464	-4.17438	-4.05435	-3.58634	-2.65603	-5.10849	-3.1875	-4.90952	-5.04119	-4.92281	-0.604197	-2.0735	-4.19914	-5.18259	-0.901708	-3.46089	-2.32303	-3.39981	-2.36164	-4.30388	-5.08975	-5.52034	-3.65703	-3.85678	-1.25718	-8.69889	-10.9096	-6.81482	-7.52647	-6.11421	-8.35324	-3.39636	-6.65182	-6.12351	-9.32282	-3.25572	-5.49158	-3.27222
Silicibacter pomeroyi DSS-3	-8.72765	-10.5497	-21.0071	-7.72424	-14.5676	-10.3298	-19.7348	-8.23619	-8.43938	-9.57213	-6.92622	-7.88265	-12.6699	-6.94785	-11.5328	-8.51666	-13.0597	-11.105	-8.8584	-9.85595	-15.6052	-2.57933	-12.8318	-14.8125	-13.8112	-13.5832	-7.33624	-18.121	-7.20307	-8.06414	-5.16066	-17.4294	-15.136	-15.3075	-14.4913	-12.011	-14.3979	-18.5776	-15.5213	-17.3497	-15.5699	-21.6475	-16.8809	-17.4482	-14.9465	-16.878	-16.6823	-17.8726	-9.17675
Silicibacter sp. TM1040	-10.2215	-9.17732	-12.9632	-6.55381	-13.2306	-6.0722	-14.2756	-4.57222	-4.81482	-5.5578	-5.63969	-5.82628	-7.70596	-6.71828	-9.40963	-4.20742	-11.946	-9.91217	-7.74559	-8.47467	-14.9582	-2.52691	-12.3396	-11.0301	-13.0457	-7.91937	-7.06989	-14.6814	-5.79724	-6.45482	-3.85746	-12.1747	-14.3639	-9.59551	-11.7562	-9.5066	-12.7878	-12.9083	-11.9235	-4.97894	-10.5326	-11.3159	-11.8902	-11.019	-13.5671	-6.98164	-14.5834	-12.699	-8.97363
Sinorhizobium medicae WSM419	-3.34717	-3.6395	-6.6867	-1.1756	-2.50074	-2.0354	1.13442	-3.62582	-4.64494	-5.9162	-0.83816	-2.17405	-2.43715	-1.56441	-2.85005	-3.28105	-3.34223	-1.53014	-2.19864	-2.03445	-7.66028	-1.75878	-5.40071	-5.33697	-2.13972	-4.53794	-4.07364	-5.28865	-3.43932	-2.95253	-2.01724	-7.42568	-0.698148	-2.5711	-0.922741	-3.59529	0.624334	-3.78313	-3.4354	-1.45653	-5.65929	-10.0788	-1.67881	-1.68979	-0.997735	-5.8327	-3.91691	-0.562116	-2.7834
Sinorhizobium meliloti 1021	-2.35003	-4.6413	-5.69373	-2.17638	-5.50222	-2.03651	-1.87529	-4.63048	-5.64917	-2.92217	-1.83977	-2.17481	-2.44501	-3.56534	-2.85063	-3.28212	-3.34273	-2.53072	-1.19935	-1.03647	-7.66387	-0.759182	-5.40347	-3.34141	-2.1436	-3.5411	-3.07479	-7.29045	-3.44139	-2.95572	-0.0185897	-7.43627	-5.7028	-2.57506	-1.92714	-5.59806	0.620793	-5.78713	-4.43881	-2.45844	-3.66789	-8.09052	-2.68661	-2.69182	-2.99941	0.161937	-3.92561	1.42796	-3.78451
Sodalis glossinidius str. 'morsitans'	-12.4168	-9.85435	-14.7908	-6.03796	-4.95877	-15.2835	-12.1699	-9.3287	-8.70646	-13.3066	-9.02675	-5.62217	-12.3854	-5.16868	-8.05618	-4.91364	-6.64563	-7.06338	-9.50247	-5.26857	-7.37325	-3.01536	-4.59787	-8.83729	-7.71274	-6.01376	-4.30907	-9.55475	-2.46845	-8.07599	-8.93766	-13.6585	-14.2809	-14.6449	-13.8498	-9.62387	-15.43	-16.3001	-18.5721	-18.6105	-15.9254	-19.593	-17.3639	-15.283	-16.9719	-20.1769	-14.651	-11.6106	-8.50428
Solibacter usitatus Ellin6076	-8.08905	-4.09257	0.422806	-3.39717	1.12399	-5.31431	-19.4459	-5.89279	-7.78458	-12.4522	-6.25723	-3.42215	-8.6635	1.21022	-4.02275	-0.534588	-2.49272	-0.673328	-4.42237	-4.5534	-3.58276	-3.88735	-2.11347	-4.46917	-2.104	-2.31686	-1.35872	-5.74055	-4.95809	-6.75036	-2.34612	-13.4522	-7.91684	-8.59225	-9.07591	-5.31351	-6.30303	-8.83616	-11.3305	-6.96376	-12.1042	-8.48017	-9.86638	-8.20346	-6.42193	-15.2453	-7.34806	-9.38987	-1.10111
Sorangium cellulosum 'So ce 56'	-7.5846	-8.38711	-14.9027	-6.58814	-5.12851	-10.5005	-16.2052	-6.79849	-6.58663	-6.44181	-6.54084	-5.66843	-9.36832	-4.92694	-5.18428	-2.68668	-2.63547	-1.77735	-6.63985	-3.8951	-7.18463	-5.0139	-6.58433	-7.18841	-6.69402	-6.78719	-4.53893	-7.04523	-3.28081	-5.23946	-2.54462	-14.8084	-5.73731	-4.26351	-7.85212	-4.79778	-9.93343	-9.55628	-10.9492	-12.3363	-7.99137	-15.1918	-13.5137	-11.5415	-10.7084	-14.2169	-11.1634	-10.571	-5.36933
Sphingomonas wittichii RW1	-16.7727	-8.27033	-23.3149	-10.0226	-9.19273	-15.804	-32.9616	-14.7244	-13.8213	-21.7183	-12.5151	-6.04368	-16.9557	-4.36639	-9.74034	-5.04727	-10.2462	-8.40561	-9.06931	-9.62387	-13.9355	-5.68704	-12.8455	-8.44203	-10.3415	-6.87957	-4.8318	-14.9116	-6.01422	-10.2987	-5.73451	-23.4428	-18.7728	-19.7719	-17.0459	-16.0377	-18.6683	-20.9878	-18.7542	-19.0729	-22.0443	-25.8973	-17.1997	-19.2713	-18.6503	-31.7673	-18.2666	-19.7008	-10.5673
Sphingopyxis alaskensis RB2256	-11.0864	-7.28839	-15.7616	-6.0735	-8.39115	-11.4234	-19.2179	-10.185	-9.49592	-10.355	-6.99252	-6.72953	-7.7864	-4.14372	-8.02948	-5.3905	-9.58729	-7.33655	-7.40824	-8.59944	-10.5054	-4.38221	-12.233	-9.30182	-6.29827	-10.3714	-3.41241	-13.5535	-5.86641	-6.08026	-5.12489	-12.7029	-12.675	-9.99597	-14.1443	-11.3574	-10.4263	-12.4312	-16.5759	-13.0871	-13.4774	-9.72663	-8.8959	-11.9835	-13.6182	-13.0071	-10.3887	-11.4012	-10.4585
Staphylococcus aureus RF122	-6.39584	-5.83543	-9.75512	-3.02207	-2.93942	-4.26772	-14.122	-3.30642	-3.68484	-6.26978	-6.0145	-2.6208	-5.35756	0.844394	-7.0399	-4.89336	-8.6297	-5.04392	-4.48665	-4.25157	-5.34654	-2.00898	-2.57727	-7.80694	-5.68046	-5.98391	-2.2943	-6.52732	-3.45079	-3.05112	-3.92206	-9.6235	-8.25143	-8.61537	-9.82147	-6.60178	-7.40492	-10.2736	-11.5468	-8.5907	-4.89598	-9.55733	-6.33431	-8.2603	-3.94934	-12.1418	-6.61947	-9.57885	-5.49061
Staphylococcus epidermidis RP62A	-10.4466	-3.88118	-12.8417	-4.06041	-3.9862	-8.30581	-14.2382	-6.3604	-6.73722	-8.35905	-8.04416	-2.6241	-9.42499	-1.18724	-8.07913	-4.94239	-8.66807	-7.0909	-7.52474	-4.29273	-8.41121	-3.02435	-5.62715	-7.88045	-6.75862	-6.05617	-2.33003	-5.59363	-3.49354	-4.11135	-5.95981	-12.7083	-14.3229	-13.6868	-14.8901	-9.65524	-11.4657	-13.3379	-14.6081	-12.6387	-7.96737	-10.6438	-8.40597	-12.3151	-12.0039	-18.2267	-8.69599	-8.65581	-6.52363
Staphylococcus haemolyticus JCSC1435	-7.87246	-6.25985	-10.5757	-5.36479	-3.37124	-10.6169	-11.2283	-4.8183	-5.1808	-7.11585	-8.29213	-2.65076	-8.00226	-0.448162	-9.38298	-6.34473	-10.9643	-8.4648	-8.81556	-6.63636	-6.95402	-3.14153	-3.04508	-6.50035	-7.41591	-6.66167	-0.624777	-6.13722	-1.85177	-6.6185	-2.27278	-12.4359	-13.925	-13.2858	-13.4682	-10.1018	-9.97485	-11.8782	-12.1217	-11.0335	-4.57917	-10.3878	-8.01817	-13.7674	-10.4507	-16.9416	-8.35212	-10.3181	-7.79059
Staphylococcus saprophyticus subsp. saprophyticus ATCC 15305	-7.41083	-3.84895	-7.78065	-2.03344	0.0467502	-6.27899	-14.1563	-6.32234	-6.70029	-7.29611	-8.02326	-0.621779	-6.37743	-1.16495	-7.05155	-4.90786	-8.64109	-5.05784	-5.49797	-3.26372	-5.36563	-2.01355	-1.592	-3.82863	-4.70353	-4.00524	-3.30486	-5.54693	-1.46341	-4.0689	-4.93321	-10.6485	-11.2725	-10.6364	-10.8417	-9.61757	-8.42285	-11.2926	-9.5649	-8.60488	-4.91702	-8.58282	-9.35544	-10.2765	-5.96547	-12.1669	-6.64202	-6.60152	-3.50039
Streptococcus agalactiae 2603V/R	-5.08642	-8.6147	-11.5866	-5.88182	-3.67615	-4.21307	-9.24953	-3.95291	-3.36621	-4.0393	-4.2434	-2.49761	-4.70629	-3.3079	-5.79344	-5.56917	-6.39728	-3.66352	-5.2215	-5.17802	-4.68455	-3.49035	-2.28748	-5.94262	-6.68838	-8.12658	-4.3346	-5.72353	-2.34875	-6.52078	-2.92158	-4.5586	-6.43383	-4.77882	-4.07209	-3.20925	-5.83566	-8.62169	-8.95604	-7.29049	-5.15256	-3.46283	-4.57084	-4.78572	-5.45155	-9.97245	-3.75661	-3.72073	-3.5504
Streptococcus gordonii str. Challis substr. CH1	-8.79906	-6.33679	-11.1249	-6.59353	-2.38613	-5.96296	-9.64853	-5.66415	-5.08375	-5.56779	-6.07244	-4.44829	-7.36312	-3.1151	-7.45904	-4.26745	-8.06265	-5.32033	-4.86713	-2.93958	-4.32144	-4.34129	-1.00347	-6.5414	-8.2588	-6.72269	-3.11533	-3.3073	-5.10767	-5.19151	-3.69614	-9.13222	-6.04069	-3.37709	-3.69288	-2.90022	-5.49021	-5.26029	-6.60481	-5.98901	-9.79136	-8.03307	-5.20231	-2.44683	-5.1001	-6.5014	-7.37258	-8.34118	-6.32125
Streptococcus mutans UA159	-5.42071	-5.96579	-11.5237	-7.19473	-1.99858	-5.62348	-10.8718	-5.28754	-4.71485	-7.95662	-5.84637	-4.35657	-8.91994	-1.85854	-3.9875	-6.86708	-8.58808	-3.84967	-5.3592	-4.6243	-3.84436	-3.12419	-0.628968	-3.01744	-6.6983	-7.19428	-2.8227	-3.7509	-2.79106	-4.76203	-2.3968	-7.58294	-6.52588	-6.84901	-5.19586	-7.4916	-7.0346	-6.78474	-7.14124	-6.58345	-10.3255	-9.48075	-6.72541	-5.99266	-6.62549	-10.8837	-6.87856	-7.85451	-7.00737
Streptococcus pneumoniae D39	-3.22047	-8.76719	-8.20839	-4.97539	-5.79115	-4.43918	-5.46719	-1.0897	-1.52084	-1.63753	-4.72626	-2.29076	-5.68904	-4.72172	-2.72458	-5.65436	-5.32212	-2.59282	-0.0724094	-1.45685	-4.59236	-0.999705	-1.43051	-7.7421	-7.40415	-7.91641	-3.66621	-5.45319	-4.62395	-2.53667	-2.23736	-5.29736	-1.25464	-0.569937	0.0661982	1.72543	-0.79309	-0.533127	-3.89539	-3.36491	-4.083	-2.19414	-6.47652	-0.748714	0.631011	-2.55796	-1.62207	-5.60253	-2.83579
Streptococcus pyogenes M1 GAS	-7.18663	-6.71875	-9.60711	-6.76688	-3.70058	-4.43736	-6.44338	-2.0811	-1.53	-5.03698	-4.10079	-5.61199	-8.53101	-3.00823	-6.25101	-8.55927	-9.81429	-6.20311	-5.43269	-5.58664	-4.29701	-4.25892	-2.40276	-7.34179	-7.91594	-9.50595	-2.84401	-1.89317	-4.76756	-5.3958	-4.40598	-9.87111	-6.86635	-8.13407	-6.59032	-5.14605	-6.54109	-8.23353	-10.6208	-7.19518	-5.86945	-7.76819	-7.2241	-4.45174	-3.98957	-9.88752	-6.34619	-6.35543	-7.89376
Streptococcus sanguinis SK36	-6.62141	-7.12276	-14.4589	-7.38277	-2.20471	-4.66086	-10.3955	-5.49775	-4.89815	-6.93419	-5.55998	-3.56109	-8.3622	-4.66105	-7.35809	-6.12223	-8.95861	-6.26565	-5.80674	-5.61933	-5.36221	-4.73258	-1.81529	-6.69715	-10.4961	-7.88302	-2.73508	-3.48073	-3.79861	-5.14042	-2.33615	-11.3762	-5.17101	-7.52809	-5.78236	-6.78138	-6.47764	-6.29536	-6.60793	-6.83643	-11.844	-12.2894	-10.2733	-3.40225	-5.08441	-12.8541	-10.4938	-10.4526	-6.95525
Streptococcus suis 05ZYH33	-10.3198	-9.8379	-7.96505	-9.10623	-4.90869	-5.41132	-7.74509	-4.18941	-3.59728	-7.42701	-5.3818	-5.52886	-9.98962	-4.46299	-7.04922	-7.81209	-9.65214	-6.93237	-4.4888	-4.371	-3.97997	-4.60156	-4.51792	-10.2706	-12.0396	-11.456	-4.51064	-7.05696	-6.54491	-7.79011	-7.10334	-9.91133	-8.75461	-9.10554	-9.38129	-5.45941	-10.1159	-6.91547	-12.2408	-6.53117	-8.45105	-7.81903	-10.8746	-5.05706	-7.73116	-9.35637	-7.07456	-12.0358	-5.73055
Streptococcus suis 98HAH33	-10.3162	-7.83439	-10.959	-8.10275	-5.90504	-4.40822	-5.7372	-3.18566	-2.59362	-6.42085	-5.37961	-5.52841	-10.9851	-4.46055	-6.04529	-8.80827	-7.64824	-5.92819	-5.48472	-5.36795	-4.9753	-4.59987	-2.51428	-9.26542	-11.034	-10.4508	-4.50787	-7.05172	-6.5418	-7.78584	-6.10048	-10.9057	-8.74953	-9.10037	-8.37639	-6.45546	-9.11151	-5.91082	-11.2363	-4.52739	-8.44629	-9.81334	-9.86975	-5.05279	-6.72678	-6.35029	-8.06949	-8.0308	-5.72774
Streptococcus thermophilus CNRZ1066	-10.2249	-5.77159	-14.2153	-5.98029	-1.79574	-10.4433	-13.4761	-7.09405	-6.52512	-9.64454	-8.72891	-4.29237	-12.6941	-3.72475	-7.73047	-5.65906	-11.3281	-7.59855	-10.0789	-3.46055	-5.59792	-4.00252	-1.43489	-9.74817	-8.41062	-7.92253	-5.66967	-3.45978	-7.62764	-4.54162	-5.24089	-16.3036	-12.2606	-12.5761	-12.9396	-8.27936	-11.7984	-10.5387	-12.9008	-12.3698	-13.0883	-16.2004	-11.482	-11.7541	-12.3747	-20.5651	-15.6277	-14.608	-5.83962
Streptomyces avermitilis MA-4680	-9.03225	-7.05858	-7.42793	-6.37814	-4.84757	-7.2933	-12.2448	-2.79166	-2.6944	-9.33616	-6.22497	-4.39876	-10.4792	-5.77354	-10.0072	-7.51662	-13.4791	-11.6623	-11.4017	-8.51405	-5.5129	-4.87535	-5.05915	-8.38426	-10.0334	-10.2603	-4.33773	-7.7064	-4.91979	-7.69173	-8.32236	-11.1994	-5.82285	-6.51466	-6.98701	-5.25837	-12.2314	-9.75444	-6.26088	-3.92346	-1.9009	-10.1927	-5.68685	-10.1648	-12.3897	-6.13542	-10.1493	-9.15467	-3.07399
Streptomyces coelicolor A3(2)	-10.2068	-7.16278	-1.88866	-5.43823	-5.9351	-7.35792	-8.86377	-4.10439	-2.97287	-8.69139	-5.32422	-4.47352	-6.05311	-4.82302	-8.05664	-5.57134	-12.5225	-8.69657	-8.46774	-8.63483	-2.72708	-3.9137	-3.22587	-7.6438	-9.24854	-4.43233	-4.40191	-8.81158	-5.03666	-5.87034	-7.39468	-8.98767	-10.1118	-6.75272	-9.26035	-8.42798	-13.452	-11.0061	-9.47545	-4.04859	-7.53428	-5.09146	-6.24491	-9.28354	-10.4889	-10.4739	-13.7666	-8.88748	-5.15939
Sulfurihydrogenibium sp. YO3AOP1	-4.30867	-4.84441	-10.794	-2.91507	-3.83064	-3.55993	-12.6769	-7.19923	-6.64618	-11.2219	-5.1751	-0.732241	-5.66507	-3.09281	1.56725	-3.68754	1.99819	-3.37125	-2.63698	-1.68981	-5.4494	-2.35407	-5.52436	-5.50526	-5.08879	-5.67008	-3.94208	-4.07853	-2.86801	-2.52842	1.49534	-9.03571	-4.02924	-3.3031	-6.74814	-1.27992	-8.68936	-8.38706	-11.7717	-7.33676	-8.00972	-8.93232	-5.36943	-7.60798	-7.15697	-12.0837	-4.49294	-3.49836	-0.00955423
Sulfurimonas denitrificans DSM 1251	-13.9778	-9.51009	-23.4116	-8.77442	-8.56703	-12.1194	-23.0213	-11.8435	-11.2592	-14.8604	-9.17888	-5.4806	-15.5759	-6.23528	-6.66958	-8.45547	-9.27352	-9.53538	-10.0909	-9.08803	-10.5473	-5.43562	-8.1802	-12.7907	-14.5257	-12.9737	-8.25207	-10.567	-9.2576	-7.39606	-5.8366	-21.3965	-17.2851	-14.627	-16.9286	-13.0926	-15.7052	-17.4851	-18.8234	-20.1772	-19.0153	-22.2993	-17.4309	-17.6583	-16.3197	-25.7943	-18.6106	-18.5763	-8.46477
Sulfurovum sp. NBC37-1	-11.1779	-8.63765	-21.3859	-9.8525	-5.73656	-8.10185	-21.6274	-11.0761	-10.4612	-15.889	-10.887	-5.60604	-14.0713	-8.01864	-6.86396	-5.68058	-4.45728	-8.83651	-8.31436	-8.07445	-8.0691	-4.93934	-7.36302	-9.49244	-9.34555	-8.67371	-7.13955	-7.23931	-8.26721	-7.79327	-6.75902	-18.2639	-14.9456	-15.309	-14.5276	-11.3718	-13.1441	-13.9978	-15.2831	-11.3827	-18.5931	-20.1909	-17.0298	-13.023	-15.7121	-18.7779	-17.295	-19.253	-11.346
Symbiobacterium thermophilum IAM 14863	-3.36325	-7.51193	-16.2828	-6.20515	-12.6065	-8.59091	-14.9384	-5.51211	-6.80853	-7.88277	-2.15102	-1.75026	-8.22845	-6.29112	-8.1387	-6.60506	-8.69119	-8.49691	-6.50521	-7.81535	-8.85976	-3.42266	-11.5033	-5.71967	-8.72696	-6.75504	-5.58019	-12.8467	-5.09555	-7.41564	-2.30981	-14.269	-10.0819	-10.3863	-9.53311	-6.63999	-6.75778	-9.78892	-11.9056	-10.3128	-9.94949	-15.3159	-11.3576	-6.24532	-7.86235	-6.48459	-12.8943	-11.9255	-6.59295
Synechococcus elongatus PCC 6301	-10.4496	-2.88385	-13.8467	-5.06264	-0.988936	-9.30803	-9.24501	-4.36356	-3.74029	-3.36428	-3.04589	-5.6243	-8.42894	-4.18909	-7.0814	0.0547512	-8.67029	-9.09363	-8.52695	-1.29514	-2.41499	-4.02524	-2.63007	-0.884749	-0.763197	-0.0603978	-3.33212	-2.59749	-5.49604	-2.11487	-4.96201	-10.7133	-5.32705	-5.69093	-7.89412	-3.65837	-6.46921	-9.34166	-8.61173	-7.64145	-7.97155	-13.6489	-6.41017	-8.3183	-9.00707	-12.2317	-9.70047	-11.6603	-3.52556
Synechococcus sp. CC9311	-11.4221	-10.7351	-11.5469	-8.71367	-12.8479	-8.99672	-13.5495	-5.4247	-5.76606	-9.11461	-4.6104	-8.68479	-7.78204	-7.77253	-6.71284	-4.83825	-11.2836	-9.89455	-7.12241	-9.07559	-12.6558	-4.26536	-10.5835	-9.30974	-10.2676	-10.4401	-6.99149	-13.804	-6.31276	-5.27796	-5.66644	-11.4232	-9.71089	-11.0598	-8.22159	-5.67359	-9.63185	-13.5787	-12.7819	-11.5236	-11.4074	-13.4025	-7.84159	-9.33164	-7.99885	-18.8715	-11.241	-10.2219	-6.1095
Synechococcus sp. CC9605	-11.7876	-10.1851	-17.4282	-11.3066	-11.2956	-10.5561	-16.0287	-6.72629	-6.09177	-7.96388	-4.24282	-7.64554	-14.8855	-7.39681	-7.32594	-4.26587	-10.9088	-10.3932	-9.76156	-9.56812	-9.8458	-4.11978	-9.96186	-7.37633	-11.2847	-9.54113	-7.56676	-13.0307	-6.78044	-6.51716	-9.21095	-16.2884	-9.8046	-10.1664	-10.3526	-7.01309	-10.8734	-11.7704	-14.0195	-10.9558	-15.4553	-14.2368	-11.8945	-9.67831	-9.36317	-19.7988	-14.2192	-15.1836	-5.7388
Synechococcus sp. CC9902	-10.7491	-8.2422	-19.6698	-11.4953	-9.32849	-11.7643	-14.6745	-4.62938	-5.02644	-9.15117	-5.63524	-8.57272	-10.5224	-5.74407	-5.48153	-2.25213	-9.08067	-8.40184	-10.9322	-6.72416	-8.52429	-4.78393	-11.9411	-7.87874	-9.6903	-7.06426	-7.82907	-11.6577	-5.90614	-6.28956	-6.43401	-11.5763	-9.34807	-9.7072	-10.9528	-7.91734	-9.63071	-12.4564	-13.7632	-11.9638	-11.0131	-14.4923	-10.4445	-12.5466	-10.2313	-18.0655	-12.6744	-13.6326	-8.04768
Synechococcus sp. JA-2-3B'a(2-13)	-9.34985	-6.67354	-17.4177	-8.67056	-7.7866	-8.9482	-19.3729	-6.34393	-7.68826	-8.98195	-3.56868	-3.68023	-9.67713	-8.73075	-7.67324	-7.7752	-11.2454	-11.8414	-10.0861	-8.01816	-8.56354	-5.25065	-6.51284	-9.20279	-8.15559	-7.33811	-6.94422	-8.71875	-6.2523	-6.19103	-9.61542	-18.29	-8.60703	-10.958	-9.12209	-5.59876	-5.54551	-8.48641	-8.69529	-9.46047	-12.2959	-14.2653	-13.731	-9.25876	-11.9287	-20.7488	-14.1213	-16.0997	-3.0692
Synechococcus sp. JA-3-3Ab	-11.0946	-5.45378	-17.9648	-8.51162	-8.56671	-9.77335	-17.7561	-5.06114	-4.41549	-8.5165	-5.42099	-4.66438	-10.3124	-8.58102	-7.52436	-6.54789	-12.1014	-11.6456	-9.94824	-7.81447	-8.23751	-4.19499	-6.26282	-8.8262	-7.75981	-5.97685	-6.7749	-9.41159	-6.03831	-4.88442	-7.43334	-16.8279	-6.24141	-10.5985	-8.77165	-5.33354	-7.24038	-9.16083	-9.38886	-11.2342	-10.9083	-16.79	-11.3461	-8.9981	-10.6761	-20.3164	-13.7053	-15.6763	-4.92289
Synechococcus sp. RCC307	-8.47329	-8.90516	-12.8872	-10.0804	-10.0107	-9.32572	-12.2994	-4.3888	-3.76477	-8.40601	-4.05972	-7.62583	-7.46051	-6.20381	-9.09947	-4.96805	-11.688	-10.1154	-9.54445	-6.31433	-6.44517	-4.0323	-12.6533	-5.91908	-4.79969	-6.09412	-7.34875	-10.6283	-7.51599	-5.143	-7.9796	-10.753	-7.36042	-7.72425	-9.92617	-5.6833	-9.49756	-10.3717	-10.6404	-12.6638	-9.00499	-12.6895	-10.4437	-12.3438	-11.0324	-18.2714	-11.7363	-9.69639	-4.54087
Synechococcus sp. WH 7803	-11.4674	-7.89984	-10.8771	-7.07595	-9.00527	-10.3213	-9.28581	-6.3825	-5.75866	-7.39559	-4.05627	-7.62545	-7.45263	-3.20014	-6.09498	-4.96236	-9.68356	-7.10995	-6.54009	-5.30954	-6.43764	-4.03054	-6.64754	-3.91051	-4.79059	-4.0857	-4.3446	-7.62064	-3.51101	-4.13598	-7.97521	-10.7431	-7.35209	-9.71594	-7.91817	-6.67708	-9.49049	-10.3642	-8.63321	-10.6582	-7.99664	-10.6793	-7.43533	-10.3374	-8.02611	-16.2615	-12.7274	-10.6874	-4.53706
Synechococcus sp. WH 8102	-12.4258	-10.8624	-20.8061	-12.0447	-11.967	-11.2902	-15.1905	-7.33823	-6.7157	-10.3224	-5.03198	-8.62275	-12.3973	-8.17427	-7.0631	-3.92229	-11.6524	-10.0717	-11.5092	-9.27584	-10.3847	-5.01808	-12.6067	-9.85026	-10.7265	-8.02651	-8.31538	-14.5664	-7.47599	-7.08662	-9.94432	-15.6734	-11.2935	-11.6575	-10.8619	-9.6333	-9.44073	-12.3115	-14.583	-11.619	-15.938	-16.6083	-14.3765	-12.2926	-11.9815	-20.1919	-15.6645	-15.6242	-8.51011
Synechocystis sp. PCC 6803	-12.7685	-6.83137	-16.0634	-8.38025	-3.90941	-5.82525	-13.0217	-8.00338	-7.27618	-4.66641	-5.38224	-6.78363	-12.9043	-6.49857	-8.27812	-3.90153	-7.82294	-11.7078	-9.6285	-4.1286	-6.3785	-4.4752	-6.89845	-9.33566	-8.35207	-6.31004	-4.81726	-6.25484	-6.42869	-5.90673	-6.5734	-15.1381	-9.68317	-9.95744	-12.1071	-6.05096	-11.2436	-12.3153	-10.387	-11.6335	-16.6726	-18.2248	-11.0607	-8.61782	-10.2049	-19.1881	-16.6673	-14.7327	-7.7791
Syntrophobacter fumaroxidans MPOB	-5.49377	-0.379494	-14.5194	0.351752	4.58524	-3.21314	-17.0526	-7.92537	-7.14759	-7.10111	-4.79395	-2.85529	-5.21471	2.1561	2.52147	1.62194	2.99018	3.9797	4.1919	0.319506	0.693626	0.444427	-1.60448	-0.450151	-1.45894	-1.2789	0.784722	0.077356	-0.0164094	-1.78315	-0.0224863	-15.8357	-8.77766	-8.97867	-9.15026	-7.77854	-7.11566	-9.26738	-10.2453	-10.1803	-11.0796	-14.016	-10.414	-7.2524	-6.77448	-19.4625	-12.1639	-12.3169	-3.08454
Syntrophomonas wolfei subsp. wolfei str. Goettingen	-5.38081	-8.82186	-16.7295	-5.01063	-7.92553	-8.2564	-21.0876	-11.2905	-10.6693	-13.2434	-3.00572	-1.61981	-7.33764	-4.14622	-6.02815	-4.8788	-4.6182	-4.02991	-3.47522	-5.23937	-7.32739	-3.00436	-8.5625	-8.7852	-8.65732	-5.96251	-2.28369	-8.50763	-5.43813	-12.0333	-2.91086	-8.59846	-7.23029	-8.59423	-6.80116	-3.58594	-8.38693	-10.2545	-12.5286	-8.57646	-9.8749	-12.5318	-11.3131	-10.244	-7.93313	-16.1167	-8.59688	-8.55613	-3.48079
Syntrophus aciditrophicus SB	-11.0316	-6.2437	-19.6597	-2.04625	-2.3478	-8.38958	-21.0772	-12.121	-11.4347	-14.2514	-5.96114	-3.7256	-11.7007	-2.11406	-3.00642	-3.34696	-0.565287	-4.30323	-3.38768	-0.556584	-1.43535	-2.37371	-3.17953	-7.21951	-5.21343	-3.29524	-1.37869	-3.49415	-3.82098	-8.014	-6.08789	-17.5934	-12.5949	-9.91881	-12.0677	-9.30136	-12.3608	-13.3607	-15.5106	-14.0419	-14.386	-16.6129	-15.8063	-11.9311	-11.569	-19.913	-15.2907	-14.3	-4.43115
Thermoanaerobacter pseudethanolicus ATCC 33223	0.473733	-1.03332	0.697561	-4.29717	-4.11187	1.41707	-2.189	-4.40011	-4.80293	-2.7734	1.49617	-2.55172	0.756184	0.401144	-1.26328	-3.02488	0.135307	-0.162254	0.290256	-4.54111	-5.24154	-0.692747	-0.721512	-5.56224	-3.35175	-4.74815	-1.66465	-6.34793	-2.71854	-5.02962	-3.26295	7.77166	3.96061	-0.394715	4.34438	1.32005	3.63643	4.82455	4.50781	5.25919	-2.71908	6.8603	1.85329	1.706	0.0260614	3.30316	3.63953	-0.319877	1.11466
Thermoanaerobacter sp. X514	0.109509	-1.37352	0.0955547	-4.61653	-4.46433	-0.877266	-4.9859	-4.77581	-5.16906	-3.39281	0.281604	-2.58454	0.2986	-1.83533	-1.61304	-2.39474	-1.21045	-2.54903	-2.06473	-3.83993	-5.7038	-1.838	-2.08031	-3.08039	-0.905804	-3.26506	-2.9323	-4.85157	-4.02518	-5.45512	-3.54178	7.19969	0.455461	-1.90554	1.85814	-2.06751	2.19995	3.36524	4.06521	2.89663	-3.20211	6.2804	0.364431	0.29492	-2.3919	3.70009	2.12343	1.16569	-1.14806
Thermoanaerobacter tengcongensis MB4	1.37262	-5.043	-4.15141	-4.19333	-7.15125	0.560338	-6.65502	-6.55359	-6.92453	-5.67848	-0.149566	-3.6356	-3.66738	-0.298957	-3.21353	-5.11514	-4.7993	-3.25399	-3.65431	-5.43893	-7.64151	-1.07658	-3.80463	-7.14281	-5.03725	-8.31332	-3.45623	-8.82711	-2.64567	-8.32617	-4.09346	-0.0134455	0.422214	-3.94095	-0.134916	-1.84518	-2.68183	-0.567012	-0.826346	3.19216	-4.22412	-0.955499	-4.66329	-0.508675	-3.19586	2.47038	-1.97126	-2.93315	-2.63911
Thermobifida fusca YX	-4.91126	-10.1449	-6.43671	-6.98486	-7.25155	-7.31435	-7.77005	-1.98134	-2.3009	-7.02452	-7.89205	-4.71714	-6.51433	-5.04823	-8.95388	-7.24995	-12.5151	-11.228	-10.3407	-7.46214	-6.28134	-5.35435	-6.06193	-3.03886	-5.02675	-4.12728	-3.30393	-6.36214	-3.72095	-2.86837	-3.00601	-8.35531	-3.41926	-3.74914	-5.89967	-6.17793	-10.2168	-12.2058	-6.367	-7.94164	-8.1872	-6.36594	-4.61101	-9.81493	-12.4595	-7.70646	-6.07759	-8.08015	-4.37018
Thermodesulfovibrio yellowstonii DSM 11347	-4.72603	-3.26563	-11.0083	-3.51822	-1.31181	-2.89833	-19.4974	-6.59116	-7.01229	-14.449	-5.0289	-0.433305	-4.27684	-2.0658	0.629268	0.809598	6.02599	-1.23109	-1.77269	-0.878851	-3.22927	-1.30124	-4.93124	-5.4399	-4.15016	-4.62038	1.94082	-3.20061	-2.04648	-5.10825	0.361426	-9.02517	-3.94109	-1.27509	-3.59676	1.17849	-5.40234	-7.16848	-10.5154	-9.91149	-7.70062	-9.92532	-7.10956	-5.35987	-7.00954	-14.382	-10.2762	-8.24613	1.73826
Thermosipho africanus TCF52B	-1.2072	-1.75397	-4.18754	-0.96065	-4.77734	-0.426844	-4.44051	-1.07661	-1.50801	-6.61648	0.281717	-3.28587	-3.67382	-2.71263	-2.70684	-3.64024	-5.30414	-3.57562	-2.05298	-5.44574	-6.57567	-1.99122	-5.41734	-2.7239	-1.38471	-2.89803	-3.6558	-6.43338	-2.61288	-5.52177	-3.22677	-1.27854	0.763317	3.44856	0.0835508	-1.26016	3.22293	5.48355	10.1209	4.64967	-2.06702	-2.17527	-3.4601	2.26755	2.64814	4.46361	-5.60519	-3.58595	-0.824284
Thermosipho melanesiensis BI429	0.936105	-1.61083	-3.96306	-0.800134	-5.62793	0.70717	-6.15376	-1.93563	-2.36968	-8.3901	-1.6321	-4.22841	-2.51012	-3.61432	-0.513056	-2.48787	-6.10747	-3.38864	-0.840093	-4.32565	-6.39555	-2.89781	-7.27518	-4.52774	-3.17541	-3.70008	-2.54312	-6.21907	-3.49352	-5.3614	-4.11226	-1.07634	-2.0431	2.64808	0.270678	-2.10449	4.39597	3.66362	7.29709	3.80783	-4.89523	-4.97259	-3.28346	3.44374	2.83409	2.69626	-1.42378	-1.40802	-1.69905
Thermosynechococcus elongatus BP-1	-7.29572	-7.74488	-15.5851	-8.9452	-6.84665	-10.192	-11.894	-2.20036	-2.58188	-4.0944	-0.955982	-4.61415	-14.2254	-6.09293	-5.96062	-3.79609	-8.55207	-9.94981	-10.4093	-5.1703	-6.21908	-4.97774	-8.47889	-5.66229	-5.52651	-2.84144	-6.22349	-6.39572	-7.36648	-3.93256	-5.84737	-16.4575	-7.1108	-9.47465	-8.68635	-3.49626	-5.28514	-10.1469	-8.42573	-11.4956	-14.7562	-17.3881	-14.1938	-8.15172	-10.841	-13.9745	-14.4697	-14.4283	-4.42477
Thermotoga lettingae TMO	7.24546	0.706571	2.94618	1.45229	-5.34085	6.07639	3.44371	-1.61963	-1.04017	-2.49531	5.9541	0.560713	1.68953	-2.08506	-0.405359	-0.22049	-4.00878	-3.26602	-2.80976	-2.90256	-2.26524	-1.31698	-4.95943	1.52051	-3.19254	1.3397	-0.0811169	-4.2423	-1.07036	-1.14072	0.338946	1.93311	4.02005	1.6851	2.36573	-0.852239	13.5634	11.7957	15.4497	16.0582	0.264009	2.03269	0.854282	8.60615	10.9551	15.5714	-2.31378	1.71684	1.71497
Thermotoga maritima MSB8	9.03185	3.48522	6.18642	4.30856	-3.52773	2.79762	1.03664	-0.841676	-1.27746	0.760315	6.42557	0.815224	-0.401379	-0.548489	0.618682	-2.38606	-0.973479	-0.262455	1.30524	-4.2453	-3.2753	-0.833577	-3.18014	-3.39706	-3.03609	-5.56823	1.53243	-4.0754	1.58612	-3.25465	-2.03559	3.05786	2.08602	2.78131	3.39553	0.999664	11.5117	13.7839	15.4149	9.91426	0.218844	0.161834	-0.166052	1.56214	3.95933	9.8515	-0.303462	-1.29013	1.38565
Thermotoga petrophila RKU-1	8.37555	1.83273	7.71988	5.70757	-4.16578	5.12823	-1.28756	-1.50591	-1.94767	-0.705306	6.63323	0.0137079	0.984989	-1.31139	-0.89501	-2.02115	-0.476828	-1.80223	0.845407	-4.95624	-2.84435	-0.591408	-2.83863	-2.93048	-2.53966	-4.09787	-1.19472	-3.55716	-0.128774	-2.87417	-2.75943	3.53399	1.54809	0.258934	3.84258	1.37448	12.9276	17.2159	17.8384	12.3012	0.623855	-0.361896	0.251627	3.99156	2.41539	12.4074	-0.87722	-1.87324	2.69632
Thermotoga sp. RQ2	6.21334	1.66821	8.46871	3.51761	-4.33701	4.97104	5.39497	-1.6641	-2.10308	-0.956433	4.5351	-0.0888331	-0.19661	-3.42343	-1.12699	-3.19322	-0.714139	-2.02076	1.58707	-5.09279	-4.0476	-0.707909	-2.99988	-4.15019	-3.77323	-5.31927	-1.32379	-3.80219	-0.263175	-4.05321	-3.88993	3.31034	3.33029	1.03363	4.63181	0.197403	7.73119	10.012	10.6384	7.11762	0.433552	-0.585489	0.0552168	1.78804	3.19891	7.14528	-1.07731	-2.06879	1.54843
Thermus thermophilus HB27	2.5923	-2.9213	-1.10831	-0.188364	-2.99545	1.51522	-3.93334	-6.27889	-5.68464	1.42598	1.56623	0.460945	-2.09737	0.479034	-0.141716	-0.902899	-2.74407	0.968878	-1.5846	-2.44346	-3.09126	-0.641174	-4.60459	0.605454	-2.17227	-0.580248	-0.576379	-2.18125	-1.61878	-1.89189	-0.171402	-0.0456381	7.12432	7.77142	6.50207	5.44666	7.77865	6.97391	7.65216	2.37925	-4.56464	-2.95482	-2.98998	4.84176	2.165	0.498848	-0.195677	-2.15608	0.203056
Thiobacillus denitrificans ATCC 25259	-11.264	-3.59999	-23.2646	-7.61825	-5.7132	-8.88997	-15.1642	-8.24834	-7.59612	-9.82477	-3.51905	-4.67486	-11.5534	-5.68074	-6.62473	-2.69949	-6.19854	-6.77699	-7.04137	-3.94976	-5.45383	-4.23258	-5.42875	-7.07585	-8.02239	-5.21671	-3.88765	-7.61641	-6.18037	-2.08777	-4.55446	-14.1331	-13.4838	-11.837	-13.004	-8.50967	-10.4429	-13.3768	-15.5923	-15.3849	-14.1643	-18.1037	-13.6006	-12.1716	-9.84446	-17.6032	-15.9801	-14.9558	-6.02066
Thiomicrospira crunogena XCL-2	-9.35662	-5.87285	-19.025	-8.14077	-6.94506	-10.4421	-16.8238	-5.22683	-4.63382	-8.48847	-8.40356	-4.53322	-10.0346	-5.48729	-5.08819	-2.85014	-5.69089	-7.97387	-7.52922	-5.40134	-7.02655	-0.618288	-6.5542	-8.32246	-6.0951	-7.50799	-4.53819	-8.10906	-6.57582	0.167313	-7.13185	-16.9674	-13.8053	-12.157	-10.4301	-8.49874	-9.16006	-9.96177	-13.2856	-11.5687	-15.4985	-17.8757	-13.9228	-10.0995	-12.7747	-21.417	-16.1252	-17.0861	-7.75843
Treponema denticola ATCC 35405	-10.1126	-12.4694	-21.9966	-5.52318	-9.58239	-5.78586	-27.7993	-15.081	-14.4346	-17.5492	-9.43143	-8.66549	-14.3378	-8.59169	-10.5353	-9.56416	-13.1121	-12.6599	-10.9585	-8.82888	-13.2605	-5.19911	-13.2805	-10.8527	-13.7877	-13.0024	-8.78697	-9.43355	-9.05342	-10.906	-5.44627	-23.8601	-17.2671	-16.6239	-16.7963	-12.3523	-14.2619	-15.1838	-15.4105	-13.2503	-15.9353	-21.823	-15.373	-12.0167	-10.6941	-22.3469	-16.7343	-17.7057	-10.9334
Treponema pallidum subsp. pallidum str. Nichols	-8.90387	-10.0945	-14.2365	-6.73268	-6.22554	-7.51552	-14.9639	-8.95189	-7.46439	-7.17348	-5.40387	-3.37653	-11.0482	-5.17777	-7.69866	-7.67914	-8.8841	-8.82552	-7.43446	-6.92953	-11.056	-4.00835	-9.0822	-9.89948	-10.4234	-9.30305	-6.42301	-7.79119	-6.40859	-7.13181	-3.99262	-17.4372	-10.2607	-11.3005	-12.1292	-9.36677	-12.2219	-11.7681	-12.2647	-9.75964	-13.2097	-16.4022	-13.3228	-9.56601	-9.59997	-18.1313	-12.6241	-12.8078	-9.45774
Trichodesmium erythraeum IMS101	-14.9547	-6.71177	-19.49	-11.794	-8.71134	-12.4393	-19.4106	-10.545	-9.72829	-5.03301	-7.05442	-4.91171	-15.1294	-7.04521	-8.5818	-3.64417	-9.10438	-10.1806	-9.90512	-7.02505	-9.89506	-4.60203	-8.05238	-10.1653	-9.15027	-10.8741	-6.45016	-10.3057	-9.3827	-2.3357	-6.29152	-20.0308	-14.4866	-14.6265	-14.8247	-9.23571	-13.6725	-10.8805	-15.7892	-13.5111	-17.0656	-19.2901	-13.3505	-13.6342	-15.1083	-22.2838	-19.2047	-19.4363	-8.26397
Tropheryma whipplei TW08/27	-5.72749	-2.70231	-8.98834	-2.07195	-0.280155	-5.73525	-9.54415	-3.72584	-3.28825	-6.61232	-3.95757	0.780454	-4.74296	-1.99144	-2.41327	-4.38063	-5.46239	-5.1706	-2.28458	-3.08233	-2.48701	-1.25948	-3.83988	-5.33666	-6.11332	-4.16603	-0.868652	-4.41234	-3.86996	-3.27966	-3.41666	-11.6902	-6.44377	-5.42705	-7.36321	-5.90943	-7.39816	-7.87456	-9.51495	-8.82272	-9.83513	-10.7161	-8.78144	-6.43197	-7.2889	-14.7656	-10.3724	-12.6561	-3.40381
Ureaplasma parvum serovar 3 str. ATCC 700970	-7.12073	-6.99338	-12.4892	-7.33499	-6.09179	-6.71253	-18.1116	-6.92518	-6.54903	-9.88075	-4.85098	-5.19163	-9.90286	-5.278	-5.97985	-3.72128	-7.98223	-7.45047	-6.94781	-4.74694	-5.63975	-3.03073	-6.15974	-6.52382	-6.63252	-5.83463	-4.87793	-7.08348	-5.82785	-6.05696	-4.37997	-13.5168	-10.3467	-8.35517	-10.2949	-7.10361	-10.2382	-11.6485	-11.4843	-10.7058	-12.9492	-14.5953	-11.7501	-8.16545	-8.02033	-17.2933	-12.6823	-15.0366	-6.19955
Verminephrobacter eiseniae EF01-2	-6.44394	-7.05061	-17.5645	-4.93395	-8.00586	-6.66278	-11.9139	-9.23695	-9.37152	-8.03692	-4.3301	-1.98464	-5.18642	-5.2429	-7.67877	-6.89565	-11.1917	-8.32319	-5.00264	-6.38519	-12.5182	-2.65155	-11.5271	-12.9283	-13.8693	-11.4842	-3.68381	-10.6788	-3.76365	-7.9152	-7.56199	-7.42247	-5.25141	-9.3124	-4.55123	-7.71672	-10.2668	-13.5395	-14.3661	-8.85034	-12.2092	-10.7884	-10.4241	-11.0214	-11.4398	-11.1667	-11.4012	-9.74246	-6.44649
Vibrio cholerae O395	-7.23716	-6.18906	-16.9949	-6.55942	-8.24139	-7.08046	-14.3198	-2.59229	-1.83377	-8.5889	-6.64857	-2.82787	-10.7346	-3.72564	-6.41378	-6.2175	-7.94985	-4.91868	-6.74932	-7.48655	-6.97823	-3.5286	-9.35485	-7.05418	-9.06954	-8.94019	-4.07838	-9.69555	-3.80989	-5.47373	-5.86707	-14.2118	-15.3876	-14.6175	-12.7788	-9.52228	-7.80661	-10.9289	-11.942	-8.99064	-11.5634	-13.3552	-12.9198	-9.0326	-9.57924	-15.0092	-10.6162	-13.7337	-9.98012
Vibrio fischeri ES114	-12.1551	-8.12737	-20.8294	-7.52971	-10.1847	-11.037	-18.0889	-7.48746	-6.73476	-11.4262	-8.60202	-5.81962	-16.5851	-6.68691	-7.39176	-4.16431	-6.92936	-7.88419	-9.72955	-6.42424	-11.8733	-5.51969	-8.275	-12.928	-14.9445	-13.8309	-7.0337	-10.6208	-8.74352	-7.37462	-4.81656	-16.018	-16.2635	-14.502	-12.6606	-8.44008	-12.7079	-13.8211	-15.845	-14.9291	-13.4028	-18.1506	-12.7655	-13.9612	-10.5154	-18.8649	-11.4455	-13.5528	-11.9459
Vibrio harveyi ATCC BAA-1116	-12.2455	-10.5754	-20.438	-6.14812	-9.4477	-9.99569	-19.5218	-7.46132	-6.49541	-12.7039	-6.78092	-4.14789	-19.1608	-5.53095	-5.82987	-5.24236	-7.32465	-7.50951	-7.17388	-9.96234	-13.5325	-2.74482	-9.30256	-13.1791	-14.0012	-11.4246	-6.0323	-11.2242	-7.36537	-6.83861	-3.96896	-19.0539	-11.533	-12.43	-9.76634	-9.4968	-12.2498	-10.6411	-14.3143	-10.3887	-17.3573	-21.667	-18.4043	-7.61727	-8.93786	-21.6424	-18.6108	-17.2135	-6.74411
Vibrio parahaemolyticus RIMD 2210633	-13.3392	-7.97924	-19.3302	-7.90497	-9.94449	-8.6163	-18.5864	-10.0855	-9.23124	-4.82078	-7.27112	-3.96767	-16.9517	-5.20196	-5.65874	-5.84443	-6.17375	-6.29479	-6.98182	-8.30856	-14.385	-2.64073	-8.42547	-10.7647	-12.7168	-11.3556	-4.63512	-10.6017	-5.68282	-5.79187	-4.50542	-17.1124	-13.0865	-12.1657	-12.3947	-9.61405	-12.1392	-8.39758	-13.2425	-11.7786	-14.9549	-20.4532	-16.1865	-6.94	-9.3707	-19.9766	-17.1362	-15.4513	-8.40783
Vibrio vulnificus CMCP6	-6.97753	-9.7279	-12.539	-7.80087	-7.72554	-7.45008	-12.4793	-5.57652	-4.75766	-6.07954	-7.0673	-2.91479	-12.1766	-5.05481	-7.58656	-6.65661	-9.1087	-8.18784	-6.90974	-9.04199	-12.9242	-3.6043	-8.07455	-12.2008	-13.1842	-10.9031	-5.46142	-13.3239	-6.40067	-5.36293	-2.30449	-11.0927	-7.52202	-7.65855	-6.85837	-7.25825	-10.7002	-9.91106	-7.81609	-8.52724	-11.1166	-16.3564	-15.3986	-6.65269	-9.12426	-14.3248	-13.2583	-12.4943	-6.27263
Wigglesworthia glossinidia endosymbiont of Glossina brevipalpis	-7.15007	-6.02382	-13.5361	-5.34526	-3.11137	-7.74851	-13.1556	-4.95984	-5.58227	-7.91122	-3.87151	-4.19206	-7.93821	-4.28969	-4.98515	-3.73125	-4.98808	-6.46045	-4.95169	-4.771	-7.67306	-3.03338	-3.19063	-5.55635	-5.65781	-4.85702	-3.89461	-5.10444	-3.84609	-4.07815	-3.39775	-10.5584	-9.38531	-8.39258	-9.33305	-7.13642	-8.27829	-8.69	-9.52132	-9.74343	-10.9854	-12.6359	-12.7891	-7.20597	-5.05963	-15.3385	-9.71377	-9.06683	-5.21869
Wolbachia endosymbiont of Drosophila melanogaster	-12.1132	-8.4287	-19.0173	-6.99408	-7.43538	-13.0092	-21.956	-9.13135	-8.62435	-13.7124	-8.18413	-1.86945	-13.2947	-5.92833	-6.90178	-3.6133	-8.20068	-8.11747	-7.63671	-7.96468	-13.513	-1.74159	-8.31361	-6.38044	-6.8529	-6.64805	-6.36246	-9.37055	-6.31824	-6.25529	-2.93052	-16.9351	-14.8282	-12.9262	-12.6621	-9.72852	-13.7509	-15.3337	-15.787	-15.3677	-14.4995	-17.8728	-11.6925	-12.2896	-12.4689	-21.0172	-14.8964	-14.0256	-6.72466
Wolinella succinogenes DSM 1740	-12.7627	-12.3013	-24.0668	-9.55609	-11.3491	-11.9308	-23.5731	-11.6277	-12.0481	-14.5085	-9.05074	-6.44096	-16.3201	-7.09054	-9.41519	-9.22906	-9.01864	-12.2759	-8.82027	-8.90932	-13.2755	-4.32143	-8.96746	-13.4908	-13.2046	-12.6717	-7.08736	-13.2542	-9.07716	-8.14998	-5.66745	-22.0788	-17.991	-18.3262	-18.645	-13.861	-15.4464	-18.2145	-18.5603	-17.9504	-18.7461	-21.9793	-17.156	-16.4035	-15.055	-27.4418	-15.3245	-14.2937	-10.2917
Xanthobacter autotrophicus Py2	-8.52098	-4.10267	-21.7382	-1.95499	-7.05042	-9.6965	-22.1566	-7.34947	-6.47559	-12.1962	-3.37346	-3.99766	-7.36212	-4.27251	-3.69333	-3.93241	-3.20461	-3.34338	-4.01804	-5.44137	-10.6161	-0.659638	-7.60173	-6.04869	-2.98079	-2.57793	-5.71913	-9.73459	-1.82279	-4.00557	-4.6031	-13.6549	-10.373	-10.4202	-9.66667	-11.7921	-10.3607	-9.64413	-12.457	-14.9028	-13.3997	-16.0402	-11.6017	-13.0807	-11.49	-22.3069	-8.59924	-9.96079	-5.47483
Xanthomonas axonopodis pv. citri str. 306	-12.9283	-4.69312	-12.4334	-6.78613	-5.6949	-10.4268	-17.3315	-7.50883	-7.69446	-10.9794	-7.03955	-4.9082	-10.0751	-2.0341	-7.57627	-4.62973	-8.09935	-5.17215	-5.89978	-8.00549	-7.86145	-4.5994	-5.0268	-10.1243	-6.11108	-8.84056	-2.43711	-6.28467	-2.36194	-6.30426	-6.2765	-9.95963	-7.4458	-9.5895	-9.78591	-8.20968	-12.6406	-13.8453	-15.7581	-16.4926	-10.007	-8.2139	-7.29511	-8.61284	-16.0898	-18.2366	-14.143	-12.3696	-6.25395
Xanthomonas campestris pv. campestris str. 8004	-13.7526	-5.56761	-11.0596	-7.73208	-6.5836	-12.342	-18.8083	-10.2697	-9.4708	-9.62253	-6.94029	-4.88571	-9.71943	-3.95871	-8.53831	-6.53099	-10.0647	-7.11365	-6.86362	-8.87456	-8.63704	-5.58183	-6.85603	-9.85111	-5.84853	-7.61531	-3.34891	-7.1416	-4.22286	-9.094	-8.17518	-6.49409	-10.1744	-10.3426	-10.5278	-10.0357	-12.428	-15.6108	-17.5507	-17.3675	-9.6233	-6.7165	-4.93158	-9.46882	-14.9645	-21.9224	-11.7387	-12.9332	-9.18642
Xanthomonas oryzae pv. oryzae KACC10331	-13.4912	-12.3776	-11.514	-7.64738	-8.41303	-14.2118	-23.0451	-10.922	-10.1444	-13.0959	-8.79248	-5.855	-11.2098	-5.84273	-9.47791	-5.37648	-11.0092	-10.0193	-8.80752	-9.67854	-10.3031	-5.55531	-10.602	-12.4461	-11.455	-12.2755	-6.21391	-10.9204	-5.01433	-10.78	-8.02093	-11.8293	-10.7737	-10.975	-12.1465	-11.776	-15.1125	-17.2639	-17.2422	-18.1784	-9.0743	-9.00912	-6.40889	-14.2502	-19.7725	-22.4579	-14.1582	-13.3108	-8.0835
Xylella fastidiosa 9a5c	-11.2764	-9.61061	-17.2866	-8.62586	-8.72381	-15.8984	-26.1942	-13.2621	-12.6094	-13.8474	-7.5262	-5.67563	-12.5712	-3.68797	-9.63182	-6.71045	-12.2054	-7.78636	-9.04791	-7.95963	-8.46964	-4.23522	-8.44087	-11.0941	-12.0416	-9.23422	-1.89583	-11.6312	-6.19074	-7.10265	-8.56327	-18.1556	-12.5015	-11.8545	-13.021	-12.5225	-13.4577	-17.3926	-16.6071	-17.3958	-14.1832	-16.1269	-12.6193	-14.1842	-15.8566	-20.6241	-16.0004	-17.9765	-11.0277
Yersinia enterocolitica subsp. enterocolitica 8081	-2.47684	-3.36705	-6.48445	-1.64257	-1.4035	-3.20454	-4.0038	1.09686	0.873316	1.93283	-5.78437	-0.853401	-0.182432	-1.83623	-1.47444	-3.36774	-1.00605	-2.01388	-2.80435	0.332256	-5.28473	-0.553827	-3.58801	-1.42397	-4.43334	-0.256706	-2.20638	-3.90797	-2.00284	-1.76277	0.987646	-7.7937	-5.75182	-2.95486	-7.12566	-3.76167	-7.09525	-5.24499	-9.22526	-7.16789	-5.0449	-2.97138	-4.38082	-4.23806	-4.76181	-8.43248	-6.12709	-3.27756	-6.07776
Yersinia pestis Angola	-3.46243	-5.35645	-10.4548	-3.63772	-4.3939	-4.1972	-2.9623	0.115738	-0.10892	-1.0383	-3.77621	-0.851803	-3.15504	-2.8297	-4.47094	-3.35893	-5.00281	-4.00839	-3.80114	-3.65689	-6.26631	-1.55234	-6.574	-2.40171	-5.41155	-3.2378	-5.19879	-3.89545	-1.99128	-1.74542	-2.00372	-3.75804	-5.72985	-4.93459	-5.10474	-5.74732	-10.0779	-6.22594	-8.20824	-7.15733	-2.01542	-3.93355	-2.35266	-9.22584	-9.751	-11.407	-4.09585	-2.24421	-4.07198
Yersinia pseudotuberculosis IP 32953	-3.4598	-4.35451	-8.44935	-1.63683	-4.39215	-3.19586	-0.954731	0.119179	-0.105682	-1.03304	-4.77473	-0.851513	-4.15005	-2.8285	-2.4703	-1.35732	-4.00222	-4.00739	-2.80056	-1.65491	-7.26296	-1.55207	-6.57145	-4.39765	-4.40757	-4.23435	-4.19741	-3.89316	-1.98918	-0.742256	-2.00214	-3.75155	-4.72584	-4.93089	-6.10093	-4.7447	-9.07472	-5.22247	-9.20514	-7.15541	-0.0100537	-0.926667	-2.34753	-8.2236	-6.74903	-7.40233	-3.09017	-1.23814	-5.07093
Zymomonas mobilis subsp. mobilis ZM4	-9.58151	-5.12416	-20.7784	-5.3668	-8.16403	-11.7692	-15.2	-11.4471	-10.8712	-16.215	-8.94259	-8.40007	-10.1071	-2.96792	-8.19209	-5.03756	-9.79436	-8.05217	-8.58066	-6.75848	-8.04698	-3.21936	-9.78821	-6.23953	-6.93578	-3.41834	-1.94758	-9.98843	-4.92549	-4.94398	-3.52434	-17.8148	-15.7443	-14.0733	-16.4068	-13.6655	-15.2283	-16.9868	-18.3384	-16.757	-14.5222	-17.7137	-9.927	-17.1868	-14.8288	-22.1459	-18.087	-15.0596	-9.14244
[truncated: 10 more columns]

## Sheet: aminoacid
Supplemental Table 6b: Residuals from the upper 95% CI for the COG amino acid transport and metabolism.
	Aeropyrum.pernix.K1	Archaeoglobus.fulgidus.DSM.4304	Caldivirga.maquilingensis.IC.167	Candidatus.Korarchaeum.cryptofilum.OPF8	Candidatus.Methanoregula.boonei.6A8	Desulfurococcus.kamchatkensis.1221n	Haloarcula.marismortui.ATCC.43049	Halobacterium.salinarum.R1	Halobacterium.sp..NRC.1	Haloquadratum.walsbyi.DSM.16790	Hyperthermus.butylicus.DSM.5456	Ignicoccus.hospitalis.KIN4.I	Metallosphaera.sedula.DSM.5348	Methanobrevibacter.smithii.ATCC.35061	Methanocaldococcus.jannaschii.DSM.2661	Methanococcoides.burtonii.DSM.6242	Methanococcus.aeolicus.Nankai.3	Methanococcus.maripaludis.C5	Methanococcus.vannielii.SB	Methanocorpusculum.labreanum.Z	Methanoculleus.marisnigri.JR1	Methanopyrus.kandleri.AV19	Methanosaeta.thermophila.PT	Methanosarcina.acetivorans.C2A	Methanosarcina.barkeri.str..Fusaro	Methanosarcina.mazei.Go1	Methanosphaera.stadtmanae.DSM.3091	Methanospirillum.hungatei.JF.1	Methanothermobacter.thermautotrophicus.str..Delta.H	Natronomonas.pharaonis.DSM.2160	Nitrosopumilus.maritimus.SCM1	Picrophilus.torridus.DSM.9790	Pyrobaculum.aerophilum.str..IM2	Pyrobaculum.arsenaticum.DSM.13514	Pyrobaculum.calidifontis.JCM.11548	Pyrobaculum.islandicum.DSM.4184	Pyrococcus.abyssi.GE5	Pyrococcus.furiosus.DSM.3638	Pyrococcus.horikoshii.OT3	Staphylothermus.marinus.F1	Sulfolobus.acidocaldarius.DSM.639	Sulfolobus.solfataricus.P2	Sulfolobus.tokodaii.str..7	Thermococcus.kodakarensis.KOD1	Thermococcus.onnurineus.NA1	Thermofilum.pendens.Hrk.5	Thermoplasma.acidophilum.DSM.1728	Thermoplasma.volcanium.GSS1	Thermoproteus.neutrophilus.V24Sta
Acaryochloris marina MBIC11017	-24.229	-33.7201	-26.8863	-27.2623	-28.5648	-10.9679	-40.6381	-26.7663	-25.0919	-42.3937	-14.4757	-18.2141	-31.3456	-25.7234	-23.8157	-23.489	-20.8896	-26.5057	-26.1589	-25.8796	-28.1161	-21.6941	-24.973	-35.366	-34.8587	-30.0522	-22.1088	-32.8375	-21.9562	-33.6836	-22.0241	-28.5924	-30.6826	-35.2511	-27.6028	-27.5964	-18.7552	-24.2016	-21.0922	-13.2562	-36.1318	-42.6935	-34.7356	-22.3725	-21.257	-19.5128	-26.2298	-25.7769	-32.2091
Acidiphilium cryptum JF-5	-19.9352	-21.7305	-13.8148	-18.5128	-21.8928	-8.2518	-21.4458	-12.9098	-12.964	-22.5652	-10.0392	-20.6945	-17.2468	-22.3827	-20.3759	-21.0764	-19.2795	-19.3383	-20.3886	-16.8412	-21.5988	-21.5482	-18.0482	-26.8802	-24.5191	-25.8595	-21.1442	-20.5691	-20.9639	-25.3378	-20.822	-18.571	-16.6349	-23.9024	-23.9084	-20.4994	-25.0379	-28.0437	-18.2265	-9.94812	-8.48902	-12.2231	-15.33	-23.2264	-15.3308	-9.11057	-14.1896	-13.9456	-19.3116
Acidithiobacillus ferrooxidans ATCC 23270	-23.6455	-35.0209	-23.6573	-23.5407	-17.0249	-10.1298	-38.0499	-24.3627	-23.6313	-36.8634	-14.8541	-17.6825	-20.1381	-22.1027	-20.2763	-29.5634	-18.5133	-28.7963	-26.1111	-22.7828	-27.7008	-20.5739	-20.744	-32.1846	-30.8908	-29.3447	-21.9058	-25.2467	-14.7872	-33.4336	-19.017	-19.103	-27.1323	-28.1416	-29.5255	-31.285	-24.2336	-28.2991	-21.4365	-10.6785	-23.3011	-26.4105	-22.2049	-21.4617	-17.2331	-17.484	-14.0652	-10.9827	-29.1209
Acidobacteria bacterium Ellin345	-10.7538	-26.9875	-9.95325	-13.5529	-22.3688	-7.16975	-30.4388	-4.68386	-4.34471	-31.7666	-7.91559	-16.9167	-13.1336	-24.0027	-22.6524	-29.8437	-23.0912	-27.2174	-26.8694	-24.6288	-24.0984	-19.6566	-22.6269	-31.5464	-31.0704	-32.2952	-21.6523	-30.8795	-20.4292	-28.5078	-13.1648	-6.22374	-15.4113	-15.2966	-17.5115	-18.762	-12.596	-18.2518	-8.25121	-5.15409	-9.6245	-17.9839	-12.3255	-10.5393	-11.5945	-12.5611	-8.74966	-2.99725	-22.5022
Acidothermus cellulolyticus 11B	-9.63049	-12.0461	-11.818	-7.73391	-11.171	-8.32044	-12.771	-10.4442	-10.3706	-10.886	-8.26837	-10.4633	-11.6673	-17.5157	-13.2887	-21.368	-15.8169	-21.1746	-21.781	-16.497	-18.7961	-15.2362	-14.0822	-25.4704	-24.356	-22.6172	-17.361	-14.117	-12.889	-16.51	-7.69015	-13.072	-8.42539	-10.1323	-7.43814	-8.54474	-11.0926	-14.2733	-9.63257	-10.3662	-5.95228	-9.0794	-7.91303	-12.4094	-9.29127	-7.90207	-9.61827	-13.3693	-13.3979
Acidovorax avenae subsp. citrulli AAC00-1	-15.6125	-18.8358	-19.845	-12.4454	-16.2883	-12.0974	-20.0427	-18.5552	-17.2309	-19.4554	-5.84881	-13.8773	-21.9602	-15.9492	-16.6135	-23.7894	-22.0673	-21.1617	-21.8247	-15.5385	-17.0187	-18.6231	-20.5784	-24.4282	-26.956	-25.1834	-18.6046	-17.7673	-17.3815	-18.289	-18.091	-15.0969	-23.28	-19.1384	-19.3862	-25.6499	-15.5104	-16.1818	-12.1379	-7.07004	-16.4394	-18.7228	-22.146	-14.466	-5.48001	-12.4076	-10.6163	-12.8886	-22.3938
Acidovorax sp. JS42	-21.2013	-24.2969	-25.7378	-17.3527	-21.4455	-12.3813	-28.2038	-26.2243	-24.0485	-28.3775	-12.1697	-20.4696	-31.1968	-19.3998	-21.1991	-19.2131	-21.8112	-18.5507	-18.3456	-18.587	-23.1743	-21.2652	-17.06	-26.1781	-27.7469	-25.0074	-23.1037	-19.6101	-20.8883	-24.0607	-18.3051	-27.8017	-21.9351	-26.541	-24.1024	-23.4976	-26.6203	-29.4429	-23.013	-13.2414	-22.5687	-27.1643	-26.3305	-23.6869	-17.3082	-11.0043	-15.2942	-17.7879	-18.2729
Acinetobacter baumannii ATCC 17978	-23.9606	-27.5909	-17.9235	-14.6871	-17.1362	-15.7722	-28.1025	-27.8498	-25.9978	-38.5448	-13.5397	-22.2957	-19.9377	-19.8727	-24.9443	-23.4821	-19.9859	-18.722	-21.8867	-17.0016	-25.8294	-27.1679	-19.5304	-22.7784	-20.4467	-21.8315	-20.6536	-22.6132	-20.4964	-30.6911	-20.0921	-19.547	-31.5911	-31.7386	-32.9141	-27.5807	-22.2952	-24.3444	-19.4632	-14.4037	-25.1401	-26.5816	-22.0101	-18.5115	-16.449	-18.3904	-15.2859	-9.12245	-28.4044
Acinetobacter sp. ADP1	-19.6246	-20.1933	-15.6069	-15.3977	-18.8622	-13.6076	-25.3111	-22.4759	-20.6554	-19.8549	-10.3657	-16.1475	-16.4814	-17.6852	-19.7833	-21.2605	-18.8739	-15.4959	-17.6996	-13.6996	-19.551	-19.0253	-19.3392	-21.3828	-21.0611	-21.4625	-15.4722	-16.2725	-12.3241	-22.118	-17.8273	-18.1848	-21.2238	-20.3335	-21.5643	-19.2557	-12.0305	-16.0887	-14.2006	-12.2175	-16.6722	-20.0223	-19.5514	-18.2526	-15.141	-13.1523	-14.9742	-11.8344	-18.0829
Actinobacillus pleuropneumoniae L20	-10.362	-17.909	-15.697	-10.2914	-13.7569	-9.23301	-14.6961	-11.2746	-10.2909	-9.88393	-6.92577	-12.6679	-15.3146	-12.3853	-18.2521	-15.3441	-15.857	-8.97608	-8.31879	-5.0986	-12.3921	-16.3473	-17.0126	-14.2173	-14.1197	-14.6036	-11.221	-18.5687	-13.0049	-13.4002	-9.52029	-14.742	-14.243	-13.0209	-16.4009	-14.5091	-13.3699	-15.6252	-11.8486	-7.18774	-18.6973	-16.8205	-17.6265	-11.2725	-8.93673	-7.7975	-14.4281	-12.0123	-16.3631
Actinobacillus succinogenes 130Z	-11.4415	-15.4091	-9.19754	-9.46219	-16.4082	-9.75096	-14.6171	-9.78857	-9.76435	-14.7766	-8.56786	-16.038	-10.9097	-11.916	-14.739	-11.3074	-14.3225	-12.5281	-12.0129	-4.73772	-16.0381	-13.7642	-13.5085	-10.2644	-13.1594	-13.5369	-8.75634	-15.2788	-12.4126	-14.3541	-7.04747	-18.3387	-12.7679	-12.5075	-9.85716	-11.9674	-17.6813	-17.3964	-14.6989	-7.74819	-12.2439	-15.3638	-16.1899	-14.7876	-13.0597	-8.31967	-11.4729	-10.1402	-13.8205
Aeromonas hydrophila subsp. hydrophila ATCC 7966	-14.0996	-21.1842	-16.6557	-9.27252	-18.3815	-5.33013	-27.9351	-9.12514	-9.95996	-25.1581	-6.12	-21.4385	-20.0674	-18.3583	-21.1668	-22.1684	-21.7911	-18.5027	-23.3082	-12.5146	-19.1097	-19.2373	-19.0198	-14.0828	-14.6547	-14.9181	-15.0653	-16.5236	-19.8509	-28.8972	-18.2447	-22.7059	-21.8357	-16.4246	-19.0075	-18.412	-12.5535	-19.3862	-9.9324	-4.18242	-23.4324	-23.9833	-26.1981	-14.6271	-14.2219	-5.91107	-10.1994	-11.7073	-19.1893
Aeromonas salmonicida subsp. salmonicida A449	-15.9832	-24.155	-19.3581	-10.9627	-21.922	-7.77678	-31.3049	-11.9722	-11.7144	-29.0757	-7.54863	-22.6998	-23.1811	-19.709	-23.4356	-23.5413	-21.9578	-19.9018	-23.6195	-16.1258	-22.6536	-21.4694	-21.3557	-19.887	-17.4325	-14.6731	-17.3877	-19.2604	-24.1665	-30.3049	-18.7521	-22.5267	-21.688	-23.4301	-22.8211	-22.144	-18.1217	-19.8622	-14.6349	-7.69813	-27.61	-27.571	-29.3416	-18.1296	-14.9637	-6.75479	-15.0248	-15.4015	-23.9028
Agrobacterium tumefaciens str. C58	-9.75208	-14.0499	-15.7141	-16.3063	-18.9288	-7.68387	-13.3	-17.5724	-16.1287	-14.9785	-8.38058	-16.1983	-15.3437	-18.3851	-18.9226	-17.2234	-21.2597	-20.5888	-20.1776	-16.2486	-13.6445	-17.8913	-19.9609	-13.3516	-12.8517	-13.0616	-16.9883	-14.6624	-19.7692	-16.0304	-17.6689	-19.114	-11.327	-13.4096	-18.3843	-18.5423	-17.1889	-22.7376	-15.0562	-8.75371	-17.9223	-16.8578	-17.5841	-24.0403	-15.3881	-9.73173	-11.7014	-15.7613	-14.2544
Akkermansia muciniphila ATCC BAA-835	-18.3475	-20.658	-16.4356	-15.433	-13.7571	-11.185	-23.2545	-12.0514	-11.9901	-24.3815	-12.1023	-15.1323	-11.249	-12.1434	-18.9285	-19.8878	-19.4728	-21.789	-18.3698	-17.0829	-21.3831	-17.8946	-13.715	-22.9503	-21.8383	-22.127	-11.9876	-17.6839	-13.5449	-18.9966	-9.30327	-20.6621	-21.0331	-21.7467	-24.0641	-24.1722	-13.76	-16.8339	-14.4106	-12.219	-11.5452	-15.6694	-14.5029	-17.0282	-14.9987	-18.7627	-15.3462	-19.0781	-24.0252
Alcanivorax borkumensis SK2	-20.6267	-25.2863	-21.479	-21.775	-23.0726	-11.6699	-24.4489	-15.7294	-16.2452	-21.8904	-12.2347	-13.9029	-19.8885	-18.9368	-15.3272	-15.8896	-16.0299	-21.2537	-18.8555	-17.6179	-20.7145	-16.8107	-14.5298	-23.0776	-18.8594	-23.5099	-22.7746	-26.7796	-18.7802	-17.1311	-12.1607	-21.5287	-23.5789	-22.3672	-20.1465	-24.0768	-19.5443	-24.4337	-17.0872	-13.0458	-22.0181	-22.59	-18.9757	-24.6822	-16.3457	-15.6113	-14.2504	-12.2473	-17.9283
Alkalilimnicola ehrlichei MLHE-1	-8.57525	-19.4783	-20.5175	-10.6634	-16.0607	-7.12686	-18.4678	-17.9013	-18.3441	-19.7411	-7.75007	-13.5218	-18.2391	-15.6805	-17.0057	-17.819	-16.562	-14.1157	-15.6393	-11.6665	-16.7118	-13.4288	-17.2891	-18.4332	-18.1933	-18.7766	-14.5097	-15.9178	-18.4707	-16.8122	-9.11547	-21.6893	-17.7247	-19.5686	-14.2357	-19.1188	-15.4263	-21.4054	-14.8247	-8.55464	-17.3713	-17.0823	-19.3155	-16.6104	-14.2659	-13.1741	-14.1372	-13.1239	-11.967
Alkaliphilus metalliredigens QYMF	-8.42957	-13.6387	-18.7044	-6.30573	-15.1831	1.99599	-23.5331	-10.3874	-9.08248	-29.0532	-5.76201	-12.8261	-17.7349	-15.8799	-14.5627	-18.7184	-11.036	-9.08808	-9.7662	-13.4203	-14.9143	-12.5792	-19.5148	0.726565	2.19376	-2.03724	-17.5423	-13.6213	-17.3195	-18.0046	-13.9943	-9.93218	-17.1091	-17.9331	-17.2231	-22.504	-3.39861	-7.09026	1.00858	-3.96152	-21.1991	-20.3861	-16.913	-5.36987	-5.33099	-10.2128	-6.44393	-3.74755	-20.2524
Alkaliphilus oremlandii OhILAs	-15.3336	-40.1762	-46.2564	-22.4387	-52.8142	-8.01032	-44.9489	-29.6052	-29.067	-53.2674	-10.6193	-42.3695	-41.8962	-48.4967	-43.8387	-47.5902	-49.4325	-44.9016	-47.4464	-46.404	-48.4628	-46.2771	-52.1012	-49.0934	-53.8592	-47.4591	-48.3282	-44.632	-49.3002	-50.3851	-39.8771	-44.3968	-39.4353	-37.2638	-37.9606	-34.8562	-25.2047	-42.1641	-10.6368	-7.42468	-44.027	-44.7003	-44.975	-30.3787	-16.0325	-12.0288	-23.9115	-25.902	-35.7053
Alteromonas macleodii 'Deep ecotype'	-25.941	-31.0081	-24.5269	-19.147	-27.2808	-12.2504	-29.5182	-19.9696	-18.8209	-36.8165	-13.0422	-21.3896	-31.8651	-22.293	-22.1157	-23.0976	-22.759	-23.4266	-26.2488	-25.4007	-31.0078	-23.1931	-20.9562	-32.9328	-32.5096	-30.7775	-22.0047	-32.3879	-22.7919	-35.6416	-17.1494	-30.5557	-35.6799	-34.2427	-33.8588	-32.2777	-23.4486	-21.2968	-16.8067	-12.0906	-29.2195	-32.7018	-30.9911	-24.5329	-17.0868	-18.7674	-22.0518	-19.5812	-33.0581
Anabaena variabilis ATCC 29413	-18.166	-30.4868	-26.0328	-25.6175	-24.1616	-14.8985	-31.5163	-17.9322	-17.446	-26.8994	-13.5695	-17.3221	-27.8392	-19.5524	-18.037	-21.3852	-19.3332	-27.7338	-25.3065	-28.4998	-29.8661	-22.9915	-25.0992	-32.6739	-29.1662	-30.3716	-19.1322	-32.987	-18.9175	-29.6498	-20.8728	-27.4854	-19.7028	-23.87	-20.7418	-17.8631	-20.4314	-22.94	-20.3924	-16.005	-29.4557	-35.6495	-29.1022	-21.2428	-25.7092	-18.2684	-22.1025	-20.0786	-19.562
Anaeromyxobacter dehalogenans 2CP-C	-22.7468	-35.897	-25.1726	-19.7796	-28.7807	-12.6569	-37.663	-20.7489	-22.5159	-34.5604	-18.4347	-17.6316	-23.8854	-26.6171	-22.3661	-33.4448	-25.9149	-25.7991	-27.5392	-35.9661	-24.5119	-19.4095	-24.2687	-36.677	-34.2295	-38.4757	-26.3038	-34.0664	-19.0839	-30.9312	-20.6202	-20.3096	-27.4625	-25.1624	-28.6059	-24.9507	-15.9724	-22.7383	-15.4465	-12.5594	-22.2965	-25.143	-26.0373	-19.9988	-12.7671	-20.5214	-20.8035	-17.2171	-25.7148
Anaeromyxobacter sp. Fw109-5	-22.0557	-31.2338	-22.4146	-20.0186	-23.9648	-8.81358	-33.5027	-14.0401	-15.7747	-31.2339	-14.5834	-16.7205	-20.2714	-27.7369	-18.4565	-29.5705	-21.9707	-23.9327	-27.6437	-31.1742	-25.6965	-20.4875	-26.3819	-35.9506	-35.4939	-40.7329	-26.4131	-31.3194	-19.1915	-25.419	-17.792	-25.5928	-23.7568	-28.5119	-30.8868	-29.2028	-12.167	-21.8997	-15.6926	-12.7407	-20.7059	-26.7026	-19.4346	-18.1692	-16.0236	-17.8275	-19.0927	-14.4579	-23.96
Anaplasma marginale str. St. Maries	-22.5027	-24.9902	-20.7966	-19.9814	-20.2403	-10.5438	-32.3928	-22.6405	-20.3993	-32.5566	-13.306	-19.3264	-24.4709	-19.9729	-18.7909	-21.403	-19.8977	-20.1499	-19.4843	-19.4006	-22.2295	-19.9563	-19.1944	-28.0549	-26.5603	-26.2408	-19.6708	-26.6858	-18.4346	-29.6919	-20.3495	-24.7762	-24.3709	-25.6123	-24.2173	-22.4314	-20.4222	-24.6157	-12.7178	-10.7916	-21.7013	-28.8544	-22.8517	-19.9474	-17.8603	-19.637	-18.0113	-18.603	-23.0256
Anaplasma phagocytophilum HZ	-33.8466	-43.5065	-36.1228	-32.4139	-36.5457	-17.5304	-53.5539	-33.0312	-31.4671	-53.6096	-19.1604	-31.3513	-40.4163	-34.9542	-33.2969	-35.7823	-34.8225	-35.8277	-35.0986	-39.1815	-38.9881	-32.6581	-35.2637	-45.809	-45.9543	-44.5856	-37.1392	-46.0237	-30.6828	-51.6811	-31.679	-40.3435	-39.4673	-41.9678	-40.3194	-38.266	-36.1034	-40.187	-27.1824	-17.9873	-36.5399	-42.6454	-38.9784	-35.4069	-28.8782	-27.1932	-29.8258	-27.227	-37.4211
Anoxybacillus flavithermus WK1	-8.2998	-16.1339	-13.2196	-10.4072	-19.7794	-3.99403	-14.8766	-6.56369	-8.02811	-19.2013	-3.60101	-17.3479	-9.84819	-15.4707	-16.8151	-18.5578	-15.4141	-14.8713	-14.419	-14.367	-13.4277	-16.2556	-19.0747	-16.0456	-13.8121	-14.4145	-13.3026	-18.5918	-16.276	-15.3253	-14.8435	-11.3557	-12.3946	-10.2211	-10.922	-15.8193	-6.17358	-10.13	-2.61052	-3.40652	-7.97887	-15.6469	-9.92734	-6.34601	-7.99982	-7.00855	-10.8799	-9.87087	-13.6686
Aquifex aeolicus VF5	-1.65161	0.555615	5.0262	-2.40758	6.59356	-1.98917	-4.14267	4.97312	5.72055	-2.3024	1.4471	8.08648	4.32943	6.86515	11.484	11.1042	10.5297	5.75101	6.27995	6.99477	4.95956	13.7816	9.51396	3.1136	6.13904	4.8695	4.97513	3.21509	8.7855	1.03053	2.25821	5.54968	1.51229	4.27001	1.87292	-0.115514	2.92658	6.04561	-2.86243	-1.64451	5.49872	3.23928	4.80215	5.77691	0.17204	-12.6503	-2.81051	2.37032	-2.0502
Arcobacter butzleri RM4018	-22.0792	-18.0173	-11.7412	-16.2564	-11.2308	-12.0134	-29.4538	-17.4391	-16.2982	-17.493	-14.112	-11.0738	-17.8062	-12.3357	-14.0434	-12.7179	-10.4623	-14.0826	-11.7863	-13.5678	-16.8522	-11.8951	-12.8859	-15.0794	-14.951	-14.0733	-11.1858	-17.2868	-13.5743	-23.1385	-7.62515	-14.1422	-22.41	-22.0925	-20.3289	-16.4219	-14.7608	-18.4449	-14.7667	-13.1209	-20.0384	-19.1941	-14.0115	-14.3105	-13.7821	-21.6249	-13.0062	-14.8461	-19.2759
Aromatoleum aromaticum EbN1	-21.3505	-26.5533	-27.6434	-20.2452	-27.1374	-15.9637	-33.3139	-25.3144	-23.0179	-31.8796	-11.7244	-17.8039	-29.6372	-16.8498	-17.5405	-20.6875	-15.0224	-18.0558	-17.7406	-25.3688	-25.8687	-14.56	-17.487	-28.2059	-28.7409	-28.9735	-21.5152	-28.5578	-17.2926	-28.8812	-19.952	-23.8607	-25.0349	-24.8441	-25.1523	-26.4407	-27.35	-33.0504	-25.9281	-16.9147	-27.095	-31.241	-29.812	-26.3279	-20.2663	-17.1299	-20.3695	-17.6864	-23.191
Arthrobacter aurescens TC1	-23.3436	-21.5459	-17.6381	-16.2399	-15.1334	-11.9602	-26.2949	-13.3081	-11.0122	-31.8645	-7.72109	-18.802	-17.6287	-14.8472	-19.5386	-24.6848	-17.0212	-17.053	-20.7384	-20.3643	-17.8647	-17.5583	-22.4846	-20.2	-18.7352	-21.9679	-19.5129	-18.5523	-18.2903	-26.8705	-18.9483	-16.8545	-26.0285	-26.8364	-22.1461	-26.4351	-17.3458	-22.0469	-13.9227	-8.91064	-20.086	-19.2284	-16.8033	-19.3242	-14.2607	-10.1228	-9.36306	-8.68113	-22.1856
Arthrobacter sp. FB24	-21.1533	-20.3399	-18.4906	-16.0938	-17.0223	-12.8632	-23.7704	-16.1314	-13.8556	-22.4476	-7.63021	-20.7482	-17.3929	-21.7745	-19.4846	-24.6096	-19.988	-22.9739	-21.6761	-26.2391	-20.754	-17.5117	-19.417	-20.0358	-25.5764	-22.8131	-23.4471	-15.3987	-17.2251	-26.5725	-20.8455	-18.6818	-27.8492	-22.6221	-21.975	-22.2819	-18.2279	-23.95	-19.7706	-10.7983	-14.835	-14.8805	-11.5599	-25.2222	-18.1043	-6.92658	-9.18431	-12.5337	-25.0368
Aster yellows witches'-broom phytoplasma AYWB	-17.4792	-26.2269	-26.8149	-18.6735	-30.0118	-8.55872	-33.5491	-21.0582	-20.1413	-34.1565	-9.98815	-27.8573	-27.221	-26.4404	-33.1426	-33.5697	-31.8921	-32.4206	-33.4022	-28.5751	-32.6265	-30.7299	-30.0184	-33.2183	-33.0396	-30.5909	-27.4574	-31.5865	-30.7199	-34.1512	-28.1685	-28.5763	-23.3853	-22.8927	-24.0741	-24.7696	-22.7097	-29.622	-14.9923	-9.6366	-26.3261	-30.9812	-27.3133	-26.0448	-18.5561	-12.1516	-22.4814	-21.9057	-24.7664
Azoarcus sp. BH72	-17.6651	-25.7003	-33.3007	-18.9273	-28.1025	-16.112	-27.7987	-24.6963	-23.5762	-17.2242	-12.9064	-20.3025	-30.5115	-19.1774	-20.0245	-24.9714	-18.7015	-16.2908	-19.1429	-24.1993	-25.8274	-17.114	-21.8429	-27.6676	-29.2528	-29.5292	-19.8969	-26.1491	-19.6873	-23.1947	-23.9803	-33.2921	-28.4069	-29.9252	-28.5983	-29.042	-22.2638	-26.1382	-21.5884	-14.9315	-29.8479	-30.2145	-26.6298	-22.3659	-13.8503	-11.5226	-23.7951	-24.3608	-27.8274
Azorhizobium caulinodans ORS 571	-1.62941	-16.854	-12.858	-7.45825	-15.2979	-5.1061	-5.09005	-4.57064	-6.24462	3.50734	-8.85683	-11.882	-5.981	-17.9556	-18.6182	-17.7959	-20.0702	-18.1684	-18.8301	-18.5494	-17.0283	-13.6271	-16.5842	-15.4424	-13.9698	-16.1969	-14.6103	-14.7808	-14.3872	-7.31528	-15.0999	-16.1122	-10.2958	-8.15733	-13.4012	-11.6634	-8.52066	-12.1902	-4.15148	-5.0801	-2.46157	-4.75401	-8.1675	-15.4748	-3.49376	-7.42589	-10.6322	-13.9016	-8.4068
Bacillus amyloliquefaciens FZB42	-8.5348	-21.421	-2.34349	-9.01045	-17.3308	-4.54854	-17.9251	-10.5431	-11.5379	-26.8227	-5.34271	-14.9186	-8.04072	-13.6731	-19.6167	-15.4084	-15.4389	-13.6886	-15.6687	-12.3309	-8.04415	-15.7591	-17.341	-18.5242	-16.1445	-14.4605	-16.4212	-16.1334	-15.229	-16.3383	-15.2431	-4.18134	-15.2609	-17.6098	-11.5051	-17.0468	-5.47609	-10.4435	-4.69738	-0.286327	-5.31211	-14.2481	-4.13364	-4.63984	-3.86445	-12.5784	-0.745619	-3.44274	-21.8507
Bacillus anthracis str. Ames	-8.68693	-12.9809	-11.6643	-6.2573	-19.8924	-4.65016	-18.11	-3.5154	-3.07843	-23.8336	-5.35062	-10.1794	-11.2654	-13.3595	-18.9049	-16.1984	-17.2485	-12.5656	-15.1575	-15.2089	-15.6095	-17.8758	-16.9393	-11.3004	-14.8019	-11.0125	-14.9661	-15.6115	-14.7465	-19.9322	-15.6367	-9.05591	-17.2677	-12.3371	-13.3279	-15.4918	-7.15072	-15.706	-6.00344	-0.714289	-11.8381	-17.7339	-8.50239	-12.0083	-11.3372	-8.65024	-3.63867	-4.71153	-15.2059
Bacillus cereus ATCC 14579	-11.6017	-12.8908	-10.5993	-7.19326	-17.8448	-3.6061	-16.8623	0.559316	-0.0125632	-23.6443	-4.31137	-14.1549	-16.163	-13.3262	-20.8819	-18.1659	-18.2339	-11.5351	-14.1314	-14.1569	-11.5637	-17.8557	-17.911	-10.2333	-16.7366	-11.9483	-17.9372	-16.545	-14.717	-23.8037	-16.5944	-9.97997	-11.1902	-12.2423	-11.2541	-14.4257	-10.1007	-18.6647	-6.93448	-0.662801	-9.72794	-14.5723	-8.39549	-13.9664	-11.2704	-7.54485	-1.55681	-5.64642	-16.1424
Bacillus clausii KSM-K16	-6.0178	-21.0935	-6.58942	-10.2079	-20.3297	-1.289	-16.7198	-5.04505	-4.88838	-24.9819	-0.0799348	-15.4134	-13.9632	-11.3248	-19.1406	-15.1321	-14.7746	-15.4636	-14.2777	-14.4561	-16.0573	-14.2146	-13.9871	-12.0057	-12.5801	-10.8458	-12.0342	-14.4538	-14.8206	-19.7655	-14.1957	-8.62853	-17.7555	-16.3309	-16.9309	-17.3428	-5.49954	-7.3403	-0.867591	-2.13506	-13.3226	-13.838	-7.09145	-7.57872	-8.15228	-12.8367	-4.12327	-9.64233	-18.1218
Bacillus halodurans C-125	-2.92157	-15.9865	-9.51111	-4.13159	-20.2683	-0.240642	-18.4673	-8.95044	-10.8038	-19.7748	-1.03271	-16.3835	-13.8403	-15.285	-19.1094	-20.0889	-15.7551	-16.4172	-16.2415	-12.3867	-14.9953	-17.1876	-18.9483	-12.9143	-17.4917	-14.7602	-14.9972	-15.3712	-18.7846	-16.6102	-13.1376	-11.5372	-15.6608	-19.2204	-13.8406	-17.2612	-4.43568	-10.2858	1.20862	-3.07942	-10.1934	-12.6674	-2.96577	-9.5213	-7.07019	-12.75	-13.0337	-10.5658	-20.042
Bacillus licheniformis ATCC 14580	-5.27078	-18.3737	-5.79378	-8.40746	-17.4889	1.58365	-23.388	-8.29188	-8.10884	-19.5278	-0.203659	-14.4906	-2.285	-11.4279	-16.2209	-14.2434	-15.8249	-7.58328	-13.371	-13.6361	-14.2181	-14.2841	-15.0873	-17.2428	-16.8095	-14.0681	-15.1298	-14.6689	-16.9137	-17.1722	-14.3461	-3.86697	-11.0028	-13.6205	-14.167	-18.5559	-1.66578	-5.48131	-1.06818	1.71824	-3.66172	-8.28833	-8.42095	-6.72744	-6.36707	-12.0686	-2.359	-0.842838	-19.3299
Bacillus pumilus SAFR-032	-4.48355	-21.3623	-7.29888	-10.9682	-20.2942	-1.52312	-20.7975	-13.4895	-13.4895	-23.7148	-2.31688	-12.9001	-8.97322	-10.6489	-16.5968	-15.381	-15.4259	-10.6595	-11.6456	-15.2898	-9.0069	-14.7418	-15.3167	-11.4701	-12.0921	-12.4101	-15.3982	-13.0858	-16.207	-22.2532	-14.2079	-6.12975	-16.2079	-15.5496	-14.4546	-17.0005	-5.43919	-9.41022	-0.657091	1.74268	-4.24197	-10.16	-6.06521	-7.60528	-6.81911	-14.5376	-8.69809	-5.40053	-17.8052
Bacillus subtilis subsp. subtilis str. 168	-12.0463	-20.1251	-6.61254	-10.2304	-18.3478	-4.30332	-22.7947	-9.07297	-10.9133	-29.0432	-6.09389	-13.4222	-8.99953	-13.3365	-19.1497	-15.1447	-14.7804	-10.4773	-12.2884	-15.4765	-9.0756	-16.2225	-16.9985	-15.0326	-13.6061	-7.87104	-15.0451	-19.4782	-15.8311	-16.8114	-16.2128	-3.65549	-18.7834	-20.3635	-16.9576	-21.3669	-5.51837	-8.35634	-4.89015	-0.151547	-7.36087	-12.8886	-6.1286	-5.59562	-8.17653	-13.8626	-1.14979	-3.66496	-22.1453
Bacillus thuringiensis str. Al Hakam	-8.79621	-10.033	-7.98572	-5.58511	-17.3929	-2.1915	-13.5583	-0.722376	-0.37875	-20.8603	-3.93562	-10.9285	-11.1855	-12.0187	-18.664	-16.86	-14.0984	-10.234	-12.8827	-11.6558	-11.1222	-15.6667	-14.6414	-7.58167	-11.1045	-6.32859	-15.6667	-16.9131	-13.4435	-16.5734	-14.1869	-8.26177	-13.4507	-9.34414	-9.54908	-13.7955	-6.62168	-15.2728	-4.28529	-0.179387	-10.6801	-16.0626	-7.37935	-11.5612	-10.6288	-9.6078	1.2102	-2.02987	-11.5347
Bacillus weihenstephanensis KBAB4	-12.1559	-13.4763	-13.025	-8.60998	-17.1559	-3.89332	-23.4867	-1.92354	-2.43834	-21.8771	-5.56498	-10.319	-14.8273	-13.5483	-18.0342	-16.3812	-14.3313	-10.7303	-12.3033	-12.4937	-11.8608	-16.989	-17.0958	-10.6662	-13.1586	-7.36406	-15.1286	-14.9791	-12.9139	-22.6349	-15.8678	-12.4764	-12.6937	-11.8589	-12.7332	-15.8553	-8.4255	-15.935	-3.38429	-2.99887	-10.4429	-13.6302	-10.0897	-12.2379	-11.7015	-9.25503	-2.09272	-4.07087	-16.5545
Bacteroides fragilis NCTC 9343	-35.4269	-35.5459	-34.9188	-33.5299	-33.5857	-18.4951	-58.8034	-30.4428	-29.2434	-57.8655	-24.2797	-26.5374	-37.4826	-26.4906	-27.2694	-31.3105	-32.855	-29.6554	-27.4271	-28.7456	-24.3157	-24.3259	-27.1477	-39.3869	-34.9489	-38.2032	-27.1876	-35.8003	-24.9701	-55.422	-27.4373	-30.0129	-38.1544	-37.7986	-40.3117	-43.6862	-27.7672	-29.5667	-25.1921	-23.3726	-32.8703	-37.5675	-36.6236	-27.8176	-24.4988	-28.2146	-25.5046	-20.966	-42.457
Bacteroides thetaiotaomicron VPI-5482	-34.8322	-35.0715	-37.0132	-35.6124	-32.4133	-19.2099	-60.6596	-32.7549	-30.4075	-57.9396	-25.9526	-28.9385	-43.2295	-26.0323	-25.6738	-31.8737	-27.1044	-29.248	-26.894	-29.6787	-29.1423	-25.6752	-27.6536	-40.6115	-35.1334	-37.3568	-27.6788	-40.9416	-25.4556	-57.6289	-30.2055	-32.294	-38.484	-39.3844	-40.5809	-42.824	-30.6434	-33.2905	-25.3142	-24.2008	-37.7271	-43.1293	-40.425	-30.5797	-25.6578	-33.6475	-26.8238	-25.0575	-40.5622
Bacteroides vulgatus ATCC 8482	-35.9183	-30.9829	-32.5085	-31.129	-29.2663	-17.239	-53.4588	-26.9472	-26.8009	-55.7678	-22.0311	-28.3825	-32.8362	-24.2836	-28.1083	-29.0874	-26.7544	-26.4156	-26.2403	-32.3843	-27.9932	-22.1867	-28.947	-40.9112	-36.4887	-38.7573	-23.996	-40.3685	-24.7834	-51.605	-27.1357	-28.5341	-36.6576	-37.2167	-41.8375	-34.2584	-26.4335	-30.284	-24.7888	-21.0775	-30.189	-38.6617	-33.9615	-25.5194	-19.0674	-26.7471	-22.0307	-18.5632	-37.0393
Bartonella bacilliformis KC583	-11.2969	-17.1628	-17.7502	-12.9426	-14.2146	-5.76496	-25.2422	-14.5969	-15.0181	-26.3018	-2.45512	-13.911	-15.004	-13.6328	-17.8943	-18.4689	-15.4191	-17.4642	-17.7802	-14.8605	-15.6769	-17.2064	-12.8771	-18.6258	-16.7549	-14.3718	-12.7908	-20.78	-14.2466	-23.3993	-17.2217	-15.9853	-19.1186	-18.6126	-19.9625	-20.9057	-15.6807	-17.8991	-11.5661	-6.23448	-13.1126	-19.2447	-15.5692	-17.012	-12.328	-10.4366	-8.29538	-9.71136	-21.0408
Bartonella henselae str. Houston-1	-12.0536	-20.1136	-22.6099	-11.5374	-19.7465	-12.1916	-25.6122	-21.8407	-22.131	-26.7435	-8.53449	-17.5061	-19.4324	-18.387	-21.9394	-22.7691	-20.7251	-21.6864	-22.7953	-20.3845	-21.3559	-21.7784	-18.9477	-22.7063	-22.7078	-21.0884	-19.3228	-19.9859	-17.8261	-26.2421	-20.473	-17.0163	-20.113	-21.4394	-22.8185	-20.7836	-18.9391	-26.0432	-15.5496	-8.79843	-19.3423	-20.6045	-18.9821	-20.8184	-12.1719	-12.8714	-14.1912	-11.8827	-21.7549
Bartonella quintana str. Toulouse	-5.95339	-11.3117	-15.2229	-6.03797	-11.4925	-4.99936	-19.1534	-13.5253	-13.0682	-19.2062	-3.25656	-8.09359	-16.7404	-11.914	-12.819	-14.8411	-11.4604	-15.9994	-16.121	-13.0104	-13.7822	-15.5034	-12.6255	-15.7969	-14.0632	-11.7549	-10.2906	-10.3027	-11.3707	-18.1803	-14.4351	-12.353	-12.3554	-12.8442	-12.2369	-13.237	-10.4961	-15.929	-9.68511	-6.37535	-13.9395	-18.7985	-14.262	-13.7343	-7.03521	-7.5522	-8.78318	-6.15152	-15.5402
Bartonella tribocorum CIP 105476	-23.6447	-32.69	-35.4769	-20.6809	-33.7137	-13.8483	-42.9822	-35.0725	-35.0402	-41.1352	-12.6881	-30.2879	-33.21	-35.1959	-36.0105	-42.6674	-35.5869	-35.8143	-38.3225	-36.0419	-38.3427	-36.0225	-32.7831	-44.6451	-42.5387	-40.8962	-32.0371	-34.5963	-31.6706	-42.7222	-33.3313	-34.6369	-33.0528	-35.7861	-33.1291	-34.2391	-30.925	-41.7228	-24.8586	-12.8537	-30.5355	-32.6557	-32.4843	-37.0684	-25.2706	-16.4186	-22.6691	-20.3513	-36.0922
Baumannia cicadellinicola str. Hc (Homalodisca coagulata)	-12.9468	-12.2972	-8.60653	-13.197	-5.11954	-10.5787	-16.0291	-3.9066	-3.10404	-13.8969	-5.99374	-10.4384	-8.80781	-6.78863	-13.6937	-10.0963	-12.6055	-10.6763	-10.8738	-9.48555	-6.62949	-10.3694	-11.429	-13.8863	-11.8036	-12.301	-7.88037	-8.11181	-11.2325	-15.3673	-6.51316	-7.28748	-8.79581	-10.9562	-11.4133	-11.3125	-13.5608	-12.839	-15.4761	-7.59131	-10.8312	-12.8045	-12.7808	-9.2103	-2.36485	-12.2105	-7.76072	-5.61381	-10.4408
Bdellovibrio bacteriovorus HD100	-30.0656	-46.8813	-46.931	-35.6217	-52.9898	-15.3162	-62.765	-38.0487	-37.0902	-65.8377	-15.1055	-38.7445	-51.4202	-44.4473	-44.4298	-60.1507	-45.3154	-51.4164	-48.4513	-53.9494	-54.6974	-49.5955	-50.1135	-64.0225	-64.6573	-57.9922	-46.206	-57.6933	-48.023	-64.5563	-43.9154	-42.705	-41.7721	-40.0568	-40.0392	-41.6196	-38.1344	-51.1326	-23.3288	-14.0214	-48.6685	-54.445	-46.5053	-40.318	-24.4475	-15.2106	-32.3105	-31.0543	-42.43
Bifidobacterium adolescentis ATCC 15703	-7.17751	-3.66214	2.76055	-3.18229	-5.97141	-5.74402	0.407988	-1.14385	-1.36097	2.22349	-5.51673	-2.24601	-2.83784	2.23103	0.983709	-2.97517	-3.14368	-3.71994	-1.55687	-5.52291	-8.61909	-2.5985	-1.93818	-4.95214	-3.9069	-5.05776	-0.62836	-3.45291	-1.52975	-0.610417	0.0405538	2.20872	-5.75517	-1.91092	-2.32354	0.662455	-3.10843	-2.76856	-8.10569	-5.44718	-0.589626	-0.832493	-0.337238	-1.54442	2.58198	-5.38307	-1.34529	-4.29588	-3.24484
Bifidobacterium longum NCC2705	-13.1927	-6.57391	-5.22562	-5.5035	-8.36049	-8.73222	-4.88379	-3.97131	-4.14019	-6.09301	-7.77579	-8.31775	-6.73845	-3.20762	-9.31592	-9.10626	-10.6593	-9.9788	-9.30056	-6.84297	-13.0143	-9.75204	-6.16964	-7.013	-6.9485	-6.92664	-7.04386	-4.94667	-8.58786	-7.1462	-2.93433	-1.89131	-7.73876	-6.77738	-7.20309	-4.25166	-10.775	-12.4876	-11.7336	-7.50116	-7.38355	-4.59152	-4.1928	-9.61721	-4.52635	-4.34083	-4.35544	-7.48746	-10.1329
Bordetella bronchiseptica RB50	-3.16783	-7.43003	-19.269	-8.86643	-17.6024	-4.38232	-8.61245	-15.0566	-14.6738	-11.6817	-7.10997	-14.0321	-20.6385	-15.1595	-16.7649	-20.0013	-16.1607	-16.376	-14.9981	-16.8894	-17.3281	-14.754	-17.7667	-18.8863	-19.3997	-20.6175	-13.7914	-20.2057	-17.5689	-10.1443	-12.3772	-24.5936	-4.79347	-8.75918	-2.87603	-6.08771	-15.8443	-19.4545	-11.5841	-7.40161	-16.1649	-17.755	-20.8495	-17.7504	-7.92699	-8.02739	-18.1422	-13.3147	-8.81692
Bordetella parapertussis 12822	-1.29172	-8.39684	-15.8106	-9.42392	-17.502	-4.4269	-4.4436	-12.3122	-13.127	-6.57303	-6.21387	-14.4969	-17.3116	-15.4364	-18.2275	-20.2524	-17.8289	-17.593	-17.3785	-18.6509	-19.2313	-15.2897	-17.0954	-20.2622	-21.8283	-20.0863	-14.1376	-24.6866	-16.9213	-9.20575	-13.3584	-21.8866	-5.02322	-7.64439	-4.1865	-3.57341	-15.6794	-22.4928	-12.0848	-7.29393	-17.6897	-15.3257	-19.4482	-17.7396	-7.38478	-4.0881	-17.3785	-13.8594	-6.34698
Bordetella pertussis Tohama I	-10.3278	-11.0227	-20.264	-12.0006	-20.4278	-7.95254	-14.9768	-17.2535	-17.3666	-10.3026	-9.72874	-14.4512	-20.4335	-19.0706	-20.1129	-19.7143	-22.1018	-19.9611	-18.0828	-17.3242	-21.1259	-19.3169	-19.7318	-23.2015	-20.8589	-22.2262	-17.8446	-25.979	-21.6781	-10.3144	-19.3737	-22.9374	-4.98813	-8.17912	-7.29222	-7.931	-19.5794	-23.6152	-13.7505	-10.6081	-20.6498	-19.1966	-20.5092	-20.7871	-11.7832	-5.65635	-15.6264	-12.4347	-10.7507
Bordetella petrii DSM 12804	-10.2263	-18.4923	-17.3135	-13.9106	-20.6352	-9.41242	-26.7797	-17.1087	-15.7198	-17.8112	-9.13725	-18.0485	-21.7094	-18.1818	-22.7806	-20.0234	-22.1705	-20.3978	-20.0162	-17.9258	-21.3601	-16.7677	-20.7863	-23.9336	-24.4455	-25.6625	-16.811	-22.2515	-20.5887	-22.2336	-16.4067	-18.6457	-10.8471	-14.8244	-11.9272	-14.1334	-17.879	-22.4829	-16.6313	-9.4367	-21.241	-15.8646	-18.9232	-20.7797	-11.9736	-6.09532	-14.1979	-10.3594	-14.861
Borrelia afzelii PKo	-28.6595	-38.7801	-37.4935	-32.0236	-38.8292	-12.9075	-49.7445	-29.5649	-28.0418	-46.7939	-18.3812	-30.9416	-37.8866	-35.2262	-38.7922	-38.0652	-37.3428	-38.1998	-37.3798	-37.4277	-42.2138	-37.2848	-33.7051	-41.7007	-40.8921	-39.5551	-36.4865	-46.0553	-36.2568	-45.8099	-33.2959	-37.6768	-35.7639	-39.2714	-38.6328	-37.5945	-31.6002	-38.3708	-23.1646	-15.3311	-38.0456	-45.0668	-39.4366	-31.8531	-27.7014	-19.5374	-31.5829	-28.9567	-37.8063
Borrelia burgdorferi B31	-38.3671	-52.937	-51.521	-43.4019	-54.2908	-17.8374	-64.8988	-42.4085	-40.6212	-61.0861	-25.6359	-44.5364	-51.109	-51.0953	-53.3279	-55.362	-52.4767	-53.0274	-52.9103	-52.836	-58.9396	-49.8958	-48.2433	-60.3341	-58.2868	-58.4221	-50.9517	-62.7834	-49.8183	-64.9409	-46.2376	-52.0828	-51.0366	-53.1813	-52.5956	-49.6129	-44.3606	-55.1191	-30.2595	-20.5466	-51.8508	-58.0909	-52.6045	-45.8337	-36.616	-24.4736	-40.5352	-39.5026	-51.5173
Borrelia garinii PBi	-22.153	-28.5038	-28.4063	-24.5951	-30.8847	-9.34458	-38.8581	-22.2868	-21.0654	-37.0392	-14.0739	-25.0954	-30.0794	-27.6562	-32.5436	-31.1353	-31.6954	-30.8284	-29.198	-28.0088	-33.8481	-31.7436	-27.9104	-31.5831	-28.1094	-30.7843	-29.3788	-36.2082	-30.1873	-36.2075	-27.078	-29.3727	-27.9237	-29.1314	-29.7632	-27.002	-25.0548	-30.2676	-17.3985	-11.5818	-31.3071	-36.3838	-31.4448	-24.6215	-19.5448	-14.3784	-23.6315	-22.2584	-29.6221
Bradyrhizobium japonicum USDA 110	-7.197	-12.6832	-13.8503	-17.2338	-13.5361	-7.95158	-11.5471	-7.73518	-7.06317	-13.3275	-9.46198	-14.1934	-12.3045	-14.697	-15.7979	-19.464	-18.876	-18.4908	-17.1398	-19.8536	-13.0917	-17.6778	-11.9541	-17.3354	-20.8273	-18.021	-16.0869	-15.802	-14.9327	-8.63595	-15.0015	-17.5526	-14.6481	-16.2114	-21.5708	-17.5651	-16.7307	-21.1749	-13.0655	-10.2374	-9.08895	-8.6306	-9.69259	-18.3506	-16.2332	-14.4558	-12.1941	-9.74716	-10.1795
Bradyrhizobium sp. BTAi1	-4.82611	-18.2641	-19.4582	-13.9144	-12.2275	-9.7615	-9.47257	-12.3857	-12.7431	-11.548	-7.30289	-12.9765	-12.8375	-13.4173	-15.6116	-21.2011	-16.7352	-21.3301	-18.9387	-21.5686	-19.8271	-14.5072	-16.7536	-23.9977	-17.4827	-19.6778	-14.8557	-16.4142	-15.6838	-8.08881	-15.7572	-15.1158	-11.2623	-15.7616	-17.2119	-15.2181	-20.4613	-20.8901	-16.7575	-9.01631	-10.598	-10.8995	-9.20236	-19.1132	-12.9577	-13.8062	-12.7892	-14.4144	-9.85091
Bradyrhizobium sp. ORS278	-8.21309	-18.5965	-20.8867	-16.4185	-16.7915	-10.4437	-6.64652	-14.8378	-15.2492	-11.2197	-7.03664	-10.6898	-14.0903	-13.0427	-17.3639	-23.8495	-17.555	-21.0973	-20.669	-20.1488	-20.4445	-17.2825	-18.4796	-26.4886	-20.9703	-22.1681	-12.545	-15.8463	-17.3515	-9.19218	-17.4046	-21.4697	-15.6659	-15.0475	-17.6531	-19.6928	-22.0591	-23.4954	-18.2504	-9.64438	-13.8017	-13.6892	-12.4161	-21.7682	-18.5022	-12.793	-14.1468	-16.9006	-12.3528
Brucella abortus biovar 1 str. 9-941	-19.2307	-13.5181	-18.2427	-10.1715	-18.6525	-9.92809	-13.1109	-14.8808	-15.1858	-6.02791	-8.63525	-17.4699	-11.5631	-19.839	-21.0439	-20.244	-22.3441	-20.4815	-19.8415	-12.378	-15.323	-23.3658	-15.4741	-19.6566	-17.3743	-13.8521	-20.6481	-19.7973	-22.5436	-14.714	-16.6563	-22.6329	-12.6605	-11.6316	-17.0766	-15.8631	-19.8846	-24.9442	-13.1132	-9.45164	-13.7171	-16.7352	-13.6302	-18.1101	-10.8438	-5.21119	-16.6796	-13.6164	-15.702
Brucella canis ATCC 23365	-18.2962	-12.8022	-17.2929	-10.1125	-18.5879	-9.44706	-15.5453	-14.1064	-14.3162	-8.18376	-8.19491	-15.9972	-14.033	-20.4959	-19.6196	-20.0354	-23.7588	-21.268	-19.5095	-15.3981	-18.2723	-22.88	-16.146	-18.9884	-17.6762	-15.0946	-19.2886	-17.9338	-23.1498	-14.5553	-16.5619	-19.8263	-14.8612	-9.93554	-16.2191	-16.934	-21.7673	-24.8312	-13.9441	-9.03607	-15.2135	-14.4787	-17.1013	-18.9933	-11.8382	-3.92404	-15.6695	-12.5507	-15.7644
Brucella melitensis 16M	-18.9714	-14.4134	-20.9779	-13.8282	-17.3101	-9.28858	-13.7954	-14.7371	-14.9765	-9.52326	-10.0252	-18.843	-15.5874	-19.3027	-23.4515	-19.8042	-23.6392	-22.0359	-21.3143	-13.094	-15.9903	-22.7303	-15.9486	-19.5909	-20.288	-14.7238	-20.1007	-22.5936	-22.9718	-14.9966	-19.2931	-21.4675	-16.4991	-15.5402	-18.8745	-16.612	-23.503	-24.5693	-15.6907	-9.8573	-14.7587	-15.9441	-14.6547	-24.731	-10.537	-3.70247	-19.368	-15.2682	-19.4452
Brucella ovis ATCC 25840	-19.7789	-10.7321	-17.7358	-13.8519	-16.2657	-10.2252	-8.90755	-14.1496	-13.576	-10.1415	-9.85998	-15.6473	-15.5274	-17.8325	-20.1432	-18.0077	-21.6679	-20.2932	-19.7985	-12.8853	-15.919	-20.5536	-14.4444	-16.7167	-13.4718	-11.0413	-18.6595	-18.1565	-20.6117	-13.1716	-17.3137	-20.9341	-16.9673	-13.8248	-20.4664	-18.3386	-18.6113	-22.6055	-12.9832	-10.6644	-11.6611	-15.4053	-17.602	-17.8033	-10.4621	-5.29771	-19.3273	-17.3101	-17.1858
Brucella suis 1330	-18.4211	-12.9512	-17.4128	-11.2212	-19.693	-8.50809	-13.8356	-15.2474	-15.4457	-9.43859	-8.25996	-16.055	-13.2038	-20.5686	-19.6826	-20.122	-23.8032	-21.3554	-19.5827	-15.5135	-18.379	-22.936	-16.2202	-20.1393	-18.8235	-15.2353	-19.3592	-19.0632	-23.2168	-15.7695	-16.6636	-21.9632	-14.9995	-10.0871	-16.3508	-17.0568	-21.8679	-24.93	-13.0416	-9.10498	-14.3881	-14.685	-15.2726	-21.0926	-12.9536	-6.01032	-16.7854	-12.6589	-15.886
Buchnera aphidicola str. APS (Acyrthosiphon pisum)	-5.65287	4.06257	7.60522	2.07533	8.02883	-7.38531	0.466928	-0.701618	0.0783588	1.53831	-3.80489	7.62598	7.45077	6.31449	10.3752	7.97622	9.43579	6.44449	9.20756	4.70007	9.53764	9.68504	7.6643	2.34172	4.40651	0.919718	9.20999	8.14583	8.84401	1.96079	9.59505	5.94046	1.49237	0.406438	-0.110282	-0.051689	0.640569	4.28767	-6.17982	-6.3841	5.44583	3.62046	4.50253	0.929064	-2.14498	-11.7783	-0.428603	1.62372	-2.20528
Burkholderia ambifaria AMMD	-13.1269	-14.5043	-12.8119	-9.35105	-14.7356	-6.39883	-15.3877	-10.7626	-10.182	-16.0303	-6.9988	-14.6549	-13.9867	-17.9967	-14.3335	-15.8063	-16.5336	-12.0665	-12.6356	-11.0932	-15.3945	-15.2551	-14.4452	-12.4201	-14.902	-13.1002	-19.5066	-13.7716	-14.3108	-16.0661	-17.3586	-5.38436	-12.5849	-13.9492	-9.57675	-9.6223	-10.0055	-17.4454	-10.1794	-6.59175	-7.69067	-11.5197	-12.3072	-11.7229	-4.43777	-4.65771	-4.05868	-4.83099	-11.2858
Burkholderia cenocepacia AU 1054	-14.0146	-12.3845	-8.7162	-11.2637	-15.6642	-8.34035	-17.0505	-14.665	-14.095	-19.7829	-7.94934	-13.6111	-14.8521	-15.9387	-15.2951	-15.7518	-15.5068	-11.0269	-12.5935	-13.0217	-13.3303	-17.2207	-15.4015	-14.3315	-15.814	-15.0128	-15.4582	-11.6759	-14.2594	-17.9018	-17.2995	-7.2748	-15.48	-12.8216	-8.47789	-11.5313	-10.9364	-15.3819	-9.08698	-6.52316	-12.5462	-16.2991	-17.1656	-12.6647	-3.3537	-5.48417	-1.94461	-3.74102	-11.1993
Burkholderia mallei ATCC 23344	-16.221	-16.4867	-10.3095	-13.9066	-15.6322	-3.4097	-24.7646	-16.104	-15.7157	-20.7995	-7.13479	-19.047	-15.7031	-16.1798	-16.7792	-18.0215	-18.1696	-16.3959	-16.0145	-9.92249	-18.3572	-19.7664	-22.7845	-20.9293	-25.4414	-21.6584	-16.8092	-18.2474	-16.5869	-22.2255	-18.4041	-11.641	-10.8423	-10.8185	-13.9226	-14.1293	-14.8759	-20.4804	-12.627	-6.43353	-15.2341	-15.8547	-16.9166	-18.7771	-6.96938	-4.08918	-11.1929	-9.35541	-16.857
Burkholderia multivorans ATCC 17616	-15.817	-17.1745	-12.5514	-12.1114	-17.5421	-8.23737	-20.4572	-12.494	-12.9429	-21.3459	-6.86182	-16.5378	-12.6158	-15.8414	-16.2306	-16.66	-18.4623	-13.9581	-15.5222	-13.8978	-17.2194	-20.163	-18.3273	-15.1772	-16.661	-15.8611	-17.3767	-17.5107	-16.1733	-17.612	-19.1975	-11.0856	-15.2971	-14.5983	-11.3051	-11.3731	-9.81662	-15.2737	-10.9246	-8.40232	-13.2921	-13.9121	-17.9171	-13.5642	-4.20509	-7.18608	-8.74551	-5.58433	-13.0488
Burkholderia pseudomallei 1106a	-15.5463	-15.9564	-10.1874	-12.684	-17.019	-4.6168	-22.6436	-16.1321	-16.5134	-21.9464	-7.18194	-18.8362	-18.4935	-19.2348	-13.4907	-16.0298	-15.6461	-15.2201	-13.8076	-9.37071	-14.6457	-17.3972	-20.6212	-17.7595	-21.2419	-18.4381	-17.7045	-19.1457	-16.5218	-20.679	-13.5899	-12.8111	-10.985	-7.43196	-11.9527	-13.9724	-12.2724	-17.7002	-11.5256	-6.8472	-18.2328	-16.3464	-18.8405	-16.9498	-4.75008	-4.333	-6.4922	-9.17521	-14.618
Burkholderia sp. 383	-13.8809	-15.3252	-8.51356	-6.96052	-9.27061	-6.78973	-16.6334	-8.43626	-9.78912	-15.6646	-7.32648	-15.0062	-7.90564	-17.4557	-12.6371	-13.2371	-13.7542	-9.3527	-9.96632	-8.60897	-9.86432	-15.5304	-13.7812	-17.0458	-15.5316	-13.7265	-15.8874	-12.469	-14.718	-16.1693	-15.7916	-7.17777	-13.3178	-10.8271	-10.2638	-6.26775	-10.4996	-17.9296	-9.80294	-6.04923	-3.66998	-4.00774	-8.27395	-13.1466	-7.9983	-4.90078	0.151839	0.537683	-6.89789
Burkholderia thailandensis E264	-14.132	-18.451	-12.0064	-9.59194	-17.1423	-3.88087	-18.4159	-16.9028	-16.42	-17.8238	-6.55411	-19.3117	-18.7986	-17.5383	-17.0275	-17.3716	-17.327	-14.722	-15.2958	-10.4792	-12.8479	-18.9831	-23.0878	-20.6476	-21.1405	-22.3462	-19.1201	-14.9602	-18.9051	-20.5992	-15.856	-13.4548	-13.672	-7.83221	-13.7125	-12.8367	-15.4115	-17.9232	-10.3648	-4.9843	-20.412	-18.5842	-19.0597	-20.2261	-7.68299	-4.22308	-9.06937	-8.05245	-12.5367
Burkholderia vietnamiensis G4	-17.8232	-14.2609	-13.4553	-11.912	-13.2252	-9.75999	-20.464	-9.383	-9.74063	-17.5417	-7.30163	-16.9749	-14.8339	-15.4153	-15.6102	-15.1992	-16.7342	-17.329	-16.9373	-12.5665	-16.8252	-17.5059	-17.7521	-19.9951	-19.4801	-15.6753	-16.854	-12.4113	-13.682	-24.0845	-16.7554	-11.1125	-12.2593	-15.7581	-12.2092	-13.2155	-11.4593	-18.888	-14.755	-9.01455	-12.5941	-19.8937	-16.1985	-15.1114	-5.95549	-6.80118	-5.78603	-7.41182	-11.8484
Burkholderia xenovorans LB400	-15.3776	-13.8931	-7.05763	-8.39646	-16.7023	-6.04317	-15.0555	-8.91258	-8.22733	-7.69778	-4.53914	-17.3141	-14.5379	-16.8514	-13.9017	-18.6097	-15.9559	-17.577	-16.2514	-11.004	-12.2328	-16.7732	-15.0642	-19.5115	-19.0084	-16.2012	-16.2148	-8.00675	-16.0704	-12.9052	-16.132	-9.78158	-11.8453	-9.437	-8.75358	-10.7448	-13.8717	-16.33	-13.2157	-4.34325	-11.3318	-8.98445	-14.9369	-13.477	-5.36804	-5.77826	-5.39652	-4.91707	-12.3498
Caldicellulosiruptor saccharolyticus DSM 8903	-15.9184	-8.38574	-7.68049	-12.1004	-14.2989	-10.3295	-24.9711	-21.8378	-19.4055	-23.5232	-9.84616	-7.40305	-16.8722	-15.342	-7.77907	-22.1399	-11.5893	-13.5724	-14.2231	-16.8033	-14.9348	-13.3086	-7.92394	-19.0278	-20.8247	-18.5283	-14.1847	-12.9011	-11.2274	-21.8685	-18.4146	-13.6408	-14.7068	-12.4613	-10.3175	-11.2792	-15.8642	-17.665	-13.5365	-12.6679	-14.0042	-13.4877	-13.9697	-12.9568	-11.6516	-6.2035	-15.5865	-19.583	-12.1324
Campylobacter concisus 13826	-25.9115	-22.2794	-24.0633	-20.7986	-18.0548	-13.0165	-29.9035	-18.6404	-17.6726	-33.1002	-14.6561	-19.0761	-28.6496	-17.7255	-20.6106	-26.5013	-16.2162	-18.3136	-14.5885	-20.4038	-22.6923	-16.7349	-18.3708	-26.3519	-26.2571	-28.7855	-18.5595	-19.8443	-19.3999	-30.5862	-13.8744	-19.0698	-26.6015	-26.3974	-25.7877	-22.8937	-18.8148	-20.8687	-14.4929	-10.9539	-26.0533	-30.1803	-26.9746	-21.6294	-18.4669	-18.5811	-19.9906	-23.5385	-23.7485
Campylobacter curvus 525.92	-19.9835	-12.9759	-17.7453	-16.7757	-10.5867	-13.5699	-21.287	-12.3309	-12.394	-17.497	-10.0977	-11.8223	-18.2815	-8.33013	-12.2532	-13.7265	-11.8447	-10.924	-10.0441	-9.95472	-14.2289	-12.4375	-11.0188	-13.5511	-14.4619	-14.0815	-9.16098	-14.3334	-10.1237	-17.913	-9.53054	-13.6761	-16.2712	-17.1081	-13.515	-14.6143	-13.6577	-15.2813	-13.7587	-12.4724	-15.7302	-18.8682	-20.6335	-14.2866	-15.4976	-16.1375	-18.0868	-16.5572	-15.4713
Campylobacter fetus subsp. fetus 82-40	-10.9922	-2.28519	-3.92936	-4.27384	-4.02432	-9.63428	-5.55303	-5.68874	-5.86257	-6.76036	-4.65122	-2.01444	-8.44807	0.130761	-1.98972	-1.6945	-1.31325	-2.65604	0.0695879	-2.51373	-5.67801	-0.439849	0.149967	-3.60931	-2.54644	-4.54247	-1.707	-2.60122	-3.2852	-3.79212	0.363021	-7.58292	-6.44276	-7.49296	-6.91791	-3.96313	-9.51123	-5.11899	-9.57228	-9.39653	-12.1038	-12.3157	-12.9073	-6.31207	-4.31626	-10.2458	-5.15624	-8.27	-2.8465
Campylobacter hominis ATCC BAA-381	-18.3425	-15.3482	-10.968	-13.5278	-10.9331	-13.3164	-16.4866	-12.775	-11.9646	-15.6868	-9.2466	-10.0273	-13.5099	-6.7664	-8.92871	-6.36027	-6.18493	-5.60748	-2.72654	-11.445	-9.58572	-3.42495	-6.81088	-11.3004	-13.2432	-13.2962	-7.61022	-13.4784	-7.30137	-12.6484	-4.67518	-10.5835	-15.4823	-17.5703	-12.9919	-14.026	-9.65411	-11.9218	-13.0487	-12.0572	-14.2002	-18.4241	-13.9843	-9.3221	-10.6361	-16.9377	-19.5097	-14.5645	-13.917
Campylobacter jejuni RM1221	-13.3006	-10.5918	-12.3175	-7.89636	-8.86003	-10.757	-12.4069	-9.95019	-12.0636	-8.62597	-9.0747	-6.44336	-16.8097	-8.68604	-8.68298	-13.3989	-7.19864	-8.32926	-9.12303	-7.27331	-11.5098	-6.97687	-7.4768	-11.2331	-13.1539	-10.9366	-9.51469	-5.53594	-11.7196	-11.8933	-6.05911	-11.1219	-9.83205	-10.7531	-10.1771	-8.25763	-10.5174	-10.316	-13.4212	-13.5984	-16.3438	-14.5102	-21.2092	-12.7992	-11.7356	-13.3383	-15.4381	-13.7612	-12.122
Candidatus Blochmannia floridanus	-3.77732	1.91072	5.51641	0.96054	9.96694	-7.46741	5.25632	2.21227	2.00183	7.35399	-3.88475	7.59932	7.34183	7.27169	6.3467	9.9462	5.41883	5.39422	7.1739	6.62245	6.46787	9.66256	3.62557	3.24634	4.31867	2.82736	9.17252	3.03782	4.81227	6.82251	9.54994	5.84477	1.37109	2.25331	-0.237867	1.8387	0.556145	4.23497	-7.3055	-5.47212	6.32895	5.44019	8.38304	2.87091	1.76231	-10.9642	0.430712	2.52361	-0.304182
Candidatus Blochmannia pennsylvanicus str. BPEN	-4.16444	1.43411	5.23237	-0.400995	8.76582	-6.72059	4.60669	3.93819	3.75735	5.78146	-3.13399	5.51067	5.99803	6.13053	6.25189	8.8463	6.3613	6.22961	7.06198	5.37203	5.24165	8.58738	2.49783	4.93906	5.0351	2.5298	8.04858	6.69198	5.70737	7.38677	12.4031	8.53959	1.98715	1.77337	0.358974	2.49033	-0.713941	5.06231	-7.69425	-6.74315	6.96155	3.88262	6.00713	4.68215	-0.52953	-10.5157	-0.00613183	3.20806	2.38077
Candidatus Carsonella ruddii PV	-13.5037	-16.4447	-14.6533	-10.3729	-16.896	-11.114	-21.5956	-19.9465	-19.4099	-22.678	-12.8721	-16.964	-17.1464	-18.0021	-17.2041	-17.5624	-17.3394	-16.7526	-18.2938	-18.8942	-19.2468	-15.9883	-16.7334	-21.9135	-22.0069	-21.3872	-19.2095	-18.7715	-14.6499	-23.9507	-18.6322	-16.1341	-16.9291	-16.0178	-17.3606	-17.8069	-15.7255	-18.8472	-13.8162	-11.8987	-15.8764	-15.4858	-17.783	-21.063	-15.0673	-9.83385	-11.8136	-12.1575	-19.2174
Candidatus Desulforudis audaxviator MP104C	-8.63049	-2.04615	-9.81801	-9.73391	-3.17103	-8.32044	-15.771	-13.4442	-14.3706	-9.88601	-6.26837	-0.463305	-13.6673	-11.5157	-2.2887	-6.36798	-1.81688	-4.17462	-6.78095	-8.49703	-2.79608	-7.23618	1.91785	-7.4704	-5.35599	-1.61716	-11.361	-6.11696	-3.88896	-16.51	-11.6902	-15.072	-4.42539	-3.13225	-4.43814	-1.54474	-10.0926	-12.2733	-11.6326	-10.3662	-15.9523	-15.0794	-14.913	-11.4094	-5.29127	-8.90207	-10.6183	-11.3693	-5.3979
Candidatus Pelagibacter ubique HTCC1062	-3.97015	9.39399	1.87956	1.0892	4.22382	-7.62861	9.18819	3.25936	2.88868	13.1084	1.45424	9.89907	1.77882	10.7471	10.7678	11.8179	7.2046	13.089	14.5559	7.55805	8.69643	7.63249	3.74735	8.26563	7.19019	3.63942	10.6813	6.37112	9.558	9.89321	3.68115	2.58897	6.44143	3.98782	3.63544	6.69546	4.14575	10.3538	0.0185694	-4.14551	4.73225	0.525651	-0.790451	6.67239	3.98586	-7.31839	-3.03073	-4.52117	7.62783
Candidatus Protochlamydia amoebophila UWE25	-28.6737	-50.3434	-48.1329	-34.631	-53.2383	-16.3827	-58.2475	-32.7126	-31.7176	-57.4282	-24.1117	-46.0706	-44.775	-53.8346	-53.6889	-58.9194	-52.2905	-50.4294	-56.8162	-54.5757	-56.8719	-50.7639	-50.4508	-59.8123	-60.7127	-57.1658	-53.6716	-59.0662	-47.4176	-59.9638	-46.9643	-46.205	-44.6851	-47.4511	-46.8233	-46.9326	-32.7513	-47.1427	-25.0944	-16.3495	-46.1433	-48.2647	-43.0777	-36.7138	-28.2614	-21.9477	-31.7303	-32.3391	-48.7862
Candidatus Ruthia magnifica str. Cm (Calyptogena magnifica)	-0.122654	9.14294	12.4972	-0.671192	19.1078	-3.8946	10.6612	13.7208	13.9961	11.5244	-0.717628	20.2412	5.82627	19.4393	21.746	25.0942	20.7173	19.2578	22.9803	17.8858	22.0733	22.6437	17.2787	19.0864	18.6174	18.9286	16.7859	13.4506	20.1047	16.4393	16.151	9.49493	8.82685	9.53116	8.96955	7.79634	7.91393	14.7414	-4.28095	-6.16095	8.59315	7.313	8.41975	12.4558	5.57536	-13.0826	2.3171	5.78067	10.2469
Candidatus Sulcia muelleri GWSS	-3.65229	0.417838	3.29276	2.53284	0.0761368	-7.23815	0.0597211	-4.0029	-4.45602	-2.91704	-5.95457	0.0244307	2.76386	0.979698	1.78664	-1.57571	1.6559	1.23316	0.695558	0.0700799	-0.275491	5.00402	1.25383	-1.95798	-2.04728	-4.43124	1.77645	-0.831706	3.33569	-1.06747	2.3483	3.8034	-2.01723	0.836696	0.543906	0.121826	2.22802	0.13172	-3.99003	-8.03982	5.01653	4.24958	3.11013	-4.08698	-9.14517	-5.91154	3.0114	2.75979	-0.278368
Candidatus Vesicomyosocius okutanii HA	1.73809	11.345	14.4728	2.28481	20.0055	-4.40674	11.9753	15.6036	14.8312	10.7998	0.853844	17.8336	9.79908	21.2463	23.3805	25.7826	22.2428	20.0725	25.714	17.87	23.0341	21.1912	20.0022	19.271	20.7512	20.0745	17.5314	16.6438	20.7367	16.6421	18.8383	10.5022	8.93745	7.71904	9.09572	10.8648	7.83136	14.6251	-3.49805	-2.64729	11.5704	9.46955	12.4288	13.2778	6.35718	-11.4595	4.25014	6.6345	12.2528
Carboxydothermus hydrogenoformans Z-2901	-3.33655	-4.63943	-15.0101	-6.53931	-10.6406	-3.05031	-16.775	-7.09546	-6.70394	-18.4092	-2.52463	-8.96757	-7.03298	-9.8275	-7.30169	-13.4879	-9.19827	-7.98873	-8.673	-6.11441	-7.27241	-6.86942	-5.40104	-14.1422	-14.9507	-9.69972	-10.6736	-3.16147	-9.74894	-14.8273	-11.7809	-10.8983	-11.9801	-10.7117	-10.6268	-9.6119	-3.29203	-6.00592	1.91592	-5.35865	-9.16952	-10.5895	-5.14013	-2.34066	0.922679	-5.87559	-4.03993	-4.03128	-14.4661
Caulobacter crescentus CB15	-24.7188	-29.6313	-24.5028	-26.1616	-23.4612	-15.6399	-37.3851	-15.7345	-15.7109	-36.2109	-18.4352	-24.9844	-25.2825	-26.7588	-24.6871	-27.5054	-24.4849	-22.7918	-23.7506	-30.4771	-25.1766	-19.8206	-23.427	-30.7166	-35.3312	-32.6402	-25.5026	-36.3029	-23.3072	-36.6432	-17.3681	-22.3657	-27.4505	-29.8256	-32.6859	-29.2121	-23.6077	-32.5617	-25.8421	-12.3907	-23.5636	-28.5651	-23.3789	-24.7628	-20.0268	-19.7262	-14.9163	-14.5939	-27.0132
Caulobacter sp. K31	-28.8709	-33.1754	-28.8051	-25.3956	-26.9952	-15.7454	-46.6475	-20.6761	-18.2201	-43.2428	-17.4351	-28.2332	-29.4862	-26.4322	-25.9551	-25.2692	-25.2804	-23.6308	-25.2143	-29.3208	-24.7082	-23.9196	-23.0004	-32.4446	-34.9424	-32.1508	-26.029	-38.7553	-24.8111	-42.2089	-19.7275	-23.2202	-36.4349	-36.5417	-33.4871	-31.6344	-27.2586	-32.7953	-25.1526	-12.8257	-24.0757	-34.0842	-26.733	-25.0985	-25.4808	-18.8824	-22.816	-21.8523	-31.3428
Cellvibrio japonicus Ueda107	-29.7883	-29.7105	-30.5626	-23.2185	-25.5099	-16.6744	-43.5596	-29.8064	-28.7758	-38.3578	-18.4701	-24.0089	-30.3736	-24.7908	-25.7132	-25.5415	-23.5019	-28.8302	-26.781	-27.5318	-30.2261	-23.8434	-20.459	-37.7886	-36.4011	-34.7075	-23.533	-26.3666	-22.3363	-39.7581	-24.4148	-32.435	-36.5218	-34.9069	-32.7539	-30.2742	-28.6571	-29.6059	-25.8968	-16.4301	-30.6584	-30.6851	-32.4714	-27.8087	-20.0879	-24.7826	-20.9808	-24.6508	-31.0742
Chlamydia muridarum Nigg	-14.6998	-21.876	-22.9092	-12.0973	-22.4369	-8.08466	-32.1634	-17.8354	-16.6403	-33.3692	-9.77305	-19.8098	-23.5771	-20.2615	-24.2375	-24.8049	-23.4484	-22.4249	-24.8434	-19.5125	-25.3664	-23.4815	-22.5563	-24.985	-25.5389	-23.2056	-19.0158	-22.5997	-22.88	-29.5853	-18.737	-19.8581	-22.3498	-20.5102	-22.1794	-17.4521	-13.5863	-18.8316	-12.9827	-9.30797	-22.8001	-25.7726	-22.9215	-16.2106	-9.1389	-12.0345	-15.1381	-14.815	-23.1062
Chlamydia trachomatis 434/Bu	-13.9179	-20.8011	-22.0758	-11.2473	-19.6999	-8.63183	-28.9602	-15.0762	-13.9281	-29.2155	-9.25453	-18.3531	-23.7253	-15.6228	-21.7479	-21.2783	-20.0621	-20.7653	-22.2753	-16.688	-20.5706	-20.065	-20.983	-21.9906	-24.5928	-19.2433	-15.4306	-22.5792	-21.3851	-27.5284	-17.1782	-19.9935	-21.3764	-20.4456	-20.1864	-15.5227	-9.79986	-15.1211	-11.2603	-8.83057	-20.9369	-26.7146	-22.0309	-12.533	-10.4474	-11.4161	-15.284	-15.0595	-21.237
Chlamydophila abortus S26/3	-16.153	-22.5038	-20.4063	-12.5951	-18.8847	-6.34458	-28.8581	-16.2868	-15.0654	-30.0392	-10.0739	-19.0954	-20.0794	-19.6562	-24.5436	-24.1353	-23.6954	-22.8284	-27.198	-19.0088	-23.8481	-24.7436	-21.9104	-21.5831	-23.1094	-21.7843	-20.3788	-22.2082	-21.1873	-27.2075	-18.078	-18.3727	-22.9237	-21.1314	-19.7632	-20.002	-14.0548	-17.2676	-12.3985	-8.58182	-19.3071	-22.3838	-20.4448	-15.6215	-9.5448	-12.3784	-15.6315	-16.2584	-24.6221
Chlamydophila caviae GPIC	-12.7747	-20.7743	-18.2642	-14.4026	-15.6068	-7.26018	-26.3312	-10.9663	-9.65663	-27.4443	-11.1505	-15.2457	-18.9244	-19.2147	-20.775	-21.4738	-18.7247	-17.3952	-20.6212	-16.8897	-19.688	-20.8092	-16.3075	-20.8465	-20.2779	-17.9734	-16.821	-21.4798	-18.4106	-25.4873	-14.3991	-20.2896	-21.029	-20.3744	-20.8956	-21.03	-8.80068	-12.9695	-11.8693	-9.5457	-17.1577	-20.5605	-21.3557	-12.1973	-9.02471	-12.5351	-14.3868	-14.8743	-22.5337
Chlamydophila felis Fe/C-56	-10.9562	-20.0306	-19.4794	-13.6072	-15.8109	-6.36135	-25.6071	-12.1603	-10.8413	-27.7143	-10.271	-16.3871	-18.1354	-16.4032	-21.9262	-20.6392	-18.8547	-17.5823	-21.7956	-15.1101	-19.9049	-19.9412	-16.4765	-16.1114	-18.5326	-18.2295	-15.9963	-21.7427	-18.5596	-23.7474	-14.5567	-19.5111	-20.2694	-19.6272	-19.1382	-18.2624	-9.00245	-15.1737	-11.0324	-7.65215	-17.3683	-20.8033	-19.5732	-10.3837	-10.1929	-12.6583	-14.5823	-15.0577	-19.7537
Chlamydophila pneumoniae AR39	-18.2471	-29.2956	-25.3107	-17.2219	-24.5741	-9.61858	-35.0826	-21.7061	-21.279	-34.1419	-13.7896	-21.3929	-24.8712	-25.021	-28.0705	-27.0058	-26.7666	-26.1406	-30.2624	-22.0492	-29.8208	-25.8342	-22.8238	-28.6425	-28.9428	-27.6408	-23.4478	-29.1938	-24.6494	-33.1135	-21.7109	-26.4183	-25.3744	-29.8443	-26.2569	-27.2794	-15.6475	-25.9807	-13.0665	-10.9748	-23.0827	-23.8588	-24.377	-18.9002	-13.3551	-16.1269	-19.0335	-19.4127	-27.6238
Chlorobium chlorochromatii CaD3	-10.1962	-14.6775	-15.4642	-14.1103	-7.49931	-8.15336	-19.4037	-9.04131	-8.06358	-20.5951	-11.8266	-10.4514	-10.0698	-15.1438	-13.0174	-12.0354	-11.6231	-13.7332	-14.0515	-14.8436	-16.1353	-9.12334	-10.7776	-16.8995	-16.8029	-18.3032	-11.9789	-13.3028	-7.78341	-13.1005	-13.2831	-13.495	-13.0072	-14.7916	-12.1756	-13.2831	-11.1661	-12.3479	-12.7177	-15.1017	-9.46016	-9.58464	-9.38651	-9.03652	-10.7639	-19.7178	-13.2672	-11.8382	-16.1373
Chlorobium phaeobacteroides DSM 266	-16.636	-24.0242	-22.3567	-18.8289	-14.982	-12.194	-31.3886	-17.4786	-16.0663	-33.9815	-13.6904	-16.1945	-20.4654	-19.0952	-20.5505	-21.8276	-17.4029	-17.2918	-18.9596	-23.4712	-18.6158	-17.0985	-16.673	-21.6006	-22.4032	-20.1286	-17.9397	-19.5441	-14.9979	-27.3636	-20.1093	-22.2819	-21.3552	-20.098	-22.9834	-20.9567	-18.588	-23.3482	-16.3169	-14.5177	-19.5993	-21.0509	-18.5674	-14.66	-16.3733	-22.0436	-19.3214	-16.3159	-24.8104
Chlorobium phaeovibrioides DSM 265	-9.6692	-14.2588	-7.92829	-15.0478	-1.15742	-8.96459	-11.6726	-1.64344	-1.80035	-15.8857	-11.0711	-3.03499	-7.42973	-7.00706	-8.08765	-2.08332	-4.47613	-5.74338	-5.17638	-7.62357	-6.81106	-6.49088	-3.92617	-3.97102	-7.90284	-8.83792	-4.84029	-10.7649	-2.30434	-5.98923	-4.64121	-10.6235	-12.441	-12.4522	-12.8792	-12.9356	-6.39988	-6.36098	-8.11637	-10.7496	-6.04954	-9.24813	-6.87228	-2.34093	-7.02562	-21.5664	-10.828	-9.00338	-13.8121
Chlorobium tepidum TLS	-14.8873	-23.7577	-18.4899	-19.0565	-10.9638	-8.92162	-26.0945	-14.1765	-14.045	-30.1452	-12.0009	-14.8686	-16.5232	-17.103	-17.8197	-16.4173	-15.2555	-14.8364	-16.5304	-17.2984	-17.5856	-11.6841	-12.6544	-18.7392	-15.6128	-17.7533	-14.9526	-20.004	-10.3585	-24.7904	-17.3734	-18.8708	-20.1495	-23.8341	-24.0808	-22.1762	-14.5432	-14.1649	-11.6166	-14.0208	-16.7619	-19.9123	-14.7337	-13.0637	-11.5853	-19.5282	-13.8228	-11.6518	-22.0301
Chloroflexus aurantiacus J-10-fl	1.82395	-22.1504	-12.8927	-9.53404	-22.7771	-5.86751	-17.5412	-2.20398	-2.13404	-20.1802	-3.66392	-17.1422	-10.8794	-20.9656	-23.8551	-23.7373	-24.5935	-28.0394	-30.9459	-23.8323	-28.4974	-19.9669	-20.6334	-27.1841	-25.7845	-23.0771	-18.6981	-18.7172	-19.4953	-19.3965	-11.6703	-13.8178	-8.91653	-9.35897	-11.1304	-10.6173	-4.92907	-9.84674	0.797689	-3.65108	-12.1861	-8.35797	-11.9856	-5.0602	-9.42713	-8.1031	-13.3407	-14.9666	-15.4112
Chloroherpeton thalassium ATCC 35110	-21.2128	-26.7611	-22.0147	-21.3819	-19.6242	-10.4709	-34.5823	-20.21	-18.7564	-41.0899	-16.008	-16.6148	-19.2954	-21.5934	-17.0112	-22.4573	-13.777	-18.8595	-16.4909	-21.1451	-22.2624	-15.5216	-18.1798	-29.4679	-24.2587	-24.9399	-17.4342	-24.2691	-15.4611	-29.394	-16.7281	-26.012	-25.0709	-27.8386	-23.6637	-25.6127	-10.149	-11.989	-13.7654	-13.8248	-19.4259	-22.9446	-22.3883	-13.2616	-13.9408	-25.3718	-19.8626	-18.86	-24.4653
Chromobacterium violaceum ATCC 12472	-14.9069	-18.0718	-19.2983	-7.90364	-15.8766	-8.73802	-22.0968	-7.9003	-9.65051	-24.909	-8.5119	-18.6778	-18.0858	-18.6794	-17.4133	-18.5104	-16.9441	-14.8689	-16.5938	-16.0745	-13.6081	-17.4502	-16.3278	-14.8196	-19.3673	-15.6097	-16.3607	-18.1979	-17.1399	-27.1844	-21.7098	-20.4567	-13.6154	-19.3437	-16.7518	-15.0817	-16.0736	-21.8224	-14.574	-7.65326	-16.5089	-22.4324	-23.2434	-19.0876	-13.9003	-7.67872	-12.9533	-11.3421	-9.84229
Chromohalobacter salexigens DSM 3043	-12.5728	-14.1318	-11.5577	-8.35287	-15.8194	-5.58229	-10.1898	-15.4179	-16.6022	-15.7488	-7.33885	-18.1242	-14.4108	-18.6558	-16.7579	-13.2256	-15.8561	-15.4604	-15.6701	-13.6524	-13.5075	-19.0028	-17.3092	-16.3211	-16.0009	-12.4049	-17.4437	-11.2194	-15.297	-14.0294	-16.7858	-18.1286	-12.1668	-13.2709	-9.51011	-11.2053	-16.9892	-16.0486	-14.1602	-6.18883	-10.5999	-11.9363	-18.4805	-17.2121	-8.0934	-6.116	-7.92618	-12.7898	-13.033
Citrobacter koseri ATCC BAA-895	-16.1928	-17.4566	-14.288	-11.8853	-19.6164	-4.39516	-19.6837	-17.0788	-16.6935	-21.7369	-4.12161	-15.0391	-20.6688	-18.169	-17.7716	-23.0108	-16.1649	-18.3853	-15.0058	-21.9049	-19.3418	-18.7598	-20.7751	-22.9065	-22.4193	-26.6367	-18.7997	-22.2253	-21.5773	-22.1824	-18.3898	-16.6158	-15.8164	-15.787	-14.8979	-12.1072	-15.8591	-16.4667	-6.60425	-5.41657	-18.1974	-23.8018	-22.8809	-13.7629	-6.94687	-5.05631	-8.16598	-6.33379	-16.8357
Clavibacter michiganensis subsp. michiganensis NCPPB 382	-8.18939	-25.4679	-17.2011	-12.1346	-18.6148	-10.908	-35.0181	-17.8326	-18.1411	-29.945	-8.61341	-18.4482	-19.5058	-18.8122	-18.0202	-29.2114	-23.3267	-24.4496	-23.814	-24.3372	-26.2849	-19.3445	-21.4467	-30.6034	-32.3222	-27.8025	-20.6219	-21.7521	-18.5189	-24.6422	-18.6198	-18.5857	-23.6133	-19.5807	-22.0316	-23.8208	-20.8495	-26.9083	-20.081	-9.42912	-19.6589	-19.6682	-21.5729	-20.0746	-12.8049	-11.1844	-16.6412	-17.5798	-26.66
Clostridium acetobutylicum ATCC 824	-25.1571	-29.1291	-19.8768	-23.5187	-15.7642	-14.8581	-44.493	-23.1847	-20.1167	-42.14	-14.6545	-18.1358	-27.8549	-16.9573	-21.8483	-20.728	-12.5892	-19.0294	-18.9381	-17.8178	-18.4844	-16.961	-19.625	-21.1651	-14.7661	-21.0593	-19.6902	-18.7002	-17.4877	-42.3654	-21.658	-26.7993	-24.8974	-28.337	-27.1122	-27.6007	-24.9159	-28.8352	-17.1874	-16.6403	-25.1604	-29.325	-24.9606	-18.0481	-22.4107	-19.0872	-18.3231	-19.9513	-27.3949
Clostridium beijerinckii NCIMB 8052	-15.214	-16.4792	-19.3042	-16.9013	-17.6283	-14.4061	-36.7445	-26.0977	-23.7102	-39.7839	-11.1315	-11.0451	-28.6945	-19.1771	-17.7773	-23.0188	-19.1685	-15.3933	-18.0124	-17.9181	-18.3534	-17.7648	-19.7822	-18.9236	-16.4359	-23.653	-17.8068	-17.2419	-16.5845	-35.2148	-22.4005	-25.6347	-14.8358	-15.8106	-13.9164	-14.1238	-20.8717	-24.477	-15.6213	-14.4293	-28.225	-25.8415	-27.9077	-17.7736	-16.9638	-10.081	-23.1862	-20.35	-15.8517
Clostridium botulinum A str. ATCC 19397	-17.8832	-36.6702	-31.7683	-15.4692	-31.8538	-7.22613	-44.3189	-27.8542	-24.9135	-50.4566	-11.0127	-28.6743	-33.1775	-29.3567	-35.3541	-42.0464	-36.2649	-34.3069	-36.3633	-29.7977	-33.5592	-31.5292	-37.0219	-36.8232	-35.4636	-37.8062	-33.1193	-29.5193	-34.9401	-46.2506	-39.7845	-34.5173	-27.58	-28.8408	-27.8562	-30.4513	-22.9992	-33.008	-15.1857	-8.91891	-32.4174	-36.1348	-37.26	-25.1896	-12.2842	-13.0709	-25.1414	-22.9021	-30.2641
Clostridium difficile 630	-14.7842	-19.7059	-10.5591	-10.2152	-21.5071	-2.6724	-42.5494	-23.8022	-21.772	-45.3492	-6.46808	-15.0075	-22.3683	-16.789	-22.7117	-25.5394	-18.5009	-14.828	-20.7792	-17.5286	-23.2233	-17.8421	-22.4572	-23.7844	-25.397	-23.7036	-21.5312	-26.3628	-23.3346	-36.7514	-23.4121	-18.4309	-18.5176	-19.9021	-19.75	-20.2705	-8.65421	-17.6033	-3.89361	-5.42782	-17.6529	-22.6781	-18.466	-11.806	-7.08433	-11.7793	-13.977	-12.6475	-24.0707
Clostridium kluyveri DSM 555	-13.3977	-15.4004	-11.0788	-13.713	-14.9261	-7.97819	-25.1085	-21.4284	-19.3358	-33.6525	-8.77411	-16.2159	-16.1668	-16.0628	-17.9331	-18.8451	-16.6435	-10.1551	-16.0367	-10.0003	-16.6487	-17.0348	-19.7297	-10.4054	-11.9989	-13.284	-15.7895	-16.9144	-15.5834	-27.7593	-18.8125	-20.034	-14.1399	-16.6162	-15.3435	-16.8109	-8.08194	-13.9805	-7.37722	-9.77795	-15.4866	-23.7451	-20.2782	-9.20036	-5.61962	-11.291	-12.5466	-12.1459	-16.6011
Clostridium novyi NT	-15.8255	-22.0219	-21.708	-19.0285	-25.251	-9.37013	-31.8629	-16.4551	-15.2761	-29.8523	-11.5423	-21.8474	-27.9056	-19.2162	-27.8877	-24.8547	-26.2342	-23.0205	-26.7527	-19.6006	-27.8718	-20.6897	-25.7637	-21.386	-30.2491	-25.3017	-20.0678	-28.3725	-21.3913	-36.4918	-21.5896	-27.1886	-22.4161	-22.0934	-22.2866	-23.3683	-20.5965	-26.5107	-14.3496	-11.5107	-23.1141	-28.2947	-25.0911	-22.2548	-16.5452	-14.0042	-17.718	-16.5972	-25.2228
Clostridium perfringens ATCC 13124	-20.6654	-42.5907	-39.6144	-29.747	-44.1517	-7.17036	-58.6621	-34.0113	-32.4469	-52.9182	-11.7987	-35.5777	-44.3668	-40.7481	-46.0669	-44.903	-43.6092	-42.1946	-44.7102	-39.7636	-42.8038	-40.4844	-43.3581	-45.559	-45.3169	-41.8941	-39.5763	-48.0237	-40.5334	-55.9714	-41.2035	-41.7979	-37.8322	-37.682	-35.338	-39.2162	-32.5084	-42.4943	-19.8948	-8.60318	-40.4995	-48.2251	-42.4424	-37.6961	-26.3528	-12.2287	-22.2214	-26.2064	-40.064
Clostridium phytofermentans ISDg	-12.3578	-25.3555	-25.0454	-14.6808	-25.8995	-10.9582	-38.006	-24.3882	-22.2996	-34.5673	-7.7543	-18.2027	-29.1151	-21.0454	-20.9192	-25.8259	-21.6346	-26.1345	-25.0205	-24.9702	-23.6216	-22.0227	-23.7126	-26.3658	-27.9606	-24.2469	-23.7732	-28.879	-23.5677	-30.6941	-23.7871	-26.9952	-23.0998	-24.5699	-20.3052	-21.7761	-15.0545	-20.9566	-13.3457	-11.7551	-29.4326	-29.6753	-26.2256	-16.1753	-17.585	-11.2569	-22.5095	-21.1137	-21.567
Clostridium tetani E88	-21.2784	-43.9555	-34.5396	-25.5065	-47.1521	-5.06481	-52.6638	-30.4059	-29.1458	-53.5326	-10.3712	-39.2424	-39.0383	-38.817	-48.4124	-42.9171	-46.5914	-37.7537	-39.5008	-37.5401	-44.7745	-43.1172	-46.3688	-36.85	-36.6934	-34.6149	-41.6691	-42.4201	-41.8788	-51.1219	-39.3969	-35.1826	-41.3402	-39.0235	-41.1171	-42.1678	-28.1747	-38.4771	-15.4825	-6.27217	-42.2085	-44.4613	-43.1879	-35.0196	-23.0195	-13.7592	-16.0979	-18.0391	-44.023
Clostridium thermocellum ATCC 27405	-18.9149	-16.3454	-21.9226	-18.7785	-17.2611	-12.261	-36.6656	-23.6724	-20.9169	-34.4086	-13.9956	-14.8156	-27.5096	-14.2685	-20.4216	-23.763	-17.6178	-18.9948	-19.2796	-20.0405	-16.9405	-18.7036	-17.9135	-23.5209	-21.2196	-22.6585	-16.0674	-18.5338	-15.9402	-30.899	-24.2456	-29.4046	-20.4357	-20.4712	-17.8142	-20.5556	-22.4566	-19.523	-18.6466	-13.8262	-26.6794	-29.8513	-25.5767	-19.6847	-18.4844	-14.6643	-24.3155	-24.2189	-18.3893
Colwellia psychrerythraea 34H	-23.0138	-25.2658	-20.1518	-19.75	-21.5159	-9.30315	-34.1737	-20.9187	-18.5522	-36.3409	-11.0379	-18.9891	-29.4512	-22.1011	-20.7232	-19.9429	-21.1349	-23.3179	-17.9505	-22.7932	-23.2433	-17.7179	-21.7151	-26.7609	-26.2782	-25.4985	-18.7398	-26.0848	-20.5169	-35.9084	-22.2989	-23.4563	-26.6518	-28.5874	-25.7409	-23.967	-14.7524	-17.3795	-12.4602	-10.3093	-23.9643	-32.4673	-27.6549	-17.6725	-9.80388	-14.851	-18.9959	-16.1968	-28.7004
Corynebacterium diphtheriae NCTC 13129	-23.2555	-20.2553	-18.9711	-19.4396	-13.4743	-13.0976	-24.7849	-17.6799	-15.5302	-25.813	-15.2139	-21.26	-15.0661	-10.5472	-20.2465	-16.9911	-17.6492	-16.307	-16.0187	-11.8139	-15.0955	-18.0865	-15.0965	-19.3905	-19.2601	-16.3658	-13.3978	-19.5452	-11.7704	-23.4583	-6.85504	-19.3907	-21.6487	-22.3295	-25.5562	-24.6468	-20.9597	-23.7	-15.9044	-14.2129	-14.2925	-20.4534	-18.2666	-23.5358	-15.9627	-11.714	-17.1745	-17.0241	-25.5009
Corynebacterium efficiens YS-314	-24.1583	-21.2028	-26.138	-17.2009	-19.6406	-13.4085	-28.7328	-23.6085	-22.0042	-27.8903	-14.064	-23.8744	-26.0628	-15.1084	-23.392	-21.349	-21.8578	-22.6168	-24.0863	-23.2867	-21.2982	-20.7788	-19.7265	-22.2374	-29.9831	-24.5275	-16.9312	-24.5955	-18.8674	-23.8394	-15.6766	-26.386	-22.416	-24.3002	-26.893	-27.7441	-27.9518	-28.97	-19.2783	-14.8692	-23.2	-25.0094	-24.1345	-27.1562	-19.8259	-11.5308	-22.6812	-22.6551	-26.5896
Corynebacterium glutamicum R	-26.1963	-24.4763	-25.208	-18.1407	-17.6211	-13.9114	-29.0336	-23.8406	-23.1486	-28.9589	-15.6171	-25.4518	-22.5153	-17.8166	-24.0241	-24.2168	-22.3296	-26.4549	-23.8186	-22.344	-20.2912	-21.3481	-21.4513	-21.6123	-29.3309	-23.8108	-20.6262	-23.7597	-17.523	-26.6542	-16.6259	-24.5936	-27.6211	-27.5892	-31.0392	-30.8279	-25.8554	-28.9143	-18.0864	-15.4329	-27.6686	-26.6794	-22.5825	-25.0805	-17.8114	-14.1888	-19.6476	-20.5859	-28.667
Corynebacterium jeikeium K411	-25.0754	-23.284	-18.066	-18.1426	-11.3558	-14.0547	-24.7603	-14.6731	-15.6232	-23.898	-11.9423	-16.8092	-19.8469	-11.7805	-14.5772	-12.4201	-16.1352	-11.4146	-15.9689	-15.6821	-13.9829	-12.561	-17.3576	-17.4474	-22.3376	-21.6528	-13.6236	-17.265	-8.20984	-21.5032	-9.92892	-18.2665	-21.6547	-20.3755	-22.7032	-22.8123	-17.4383	-22.4072	-19.1971	-15.0776	-14.1542	-21.2764	-14.1086	-17.6588	-14.7172	-18.6291	-18.0843	-15.7973	-22.6654
Coxiella burnetii RSA 493	-21.4867	-33.8566	-26.5881	-19.1056	-28.1651	-9.84708	-39.7223	-27.2136	-25.3217	-40.9412	-15.1885	-29.7123	-28.0823	-27.985	-34.9733	-34.7725	-31.5003	-33.6203	-37.4527	-30.5728	-32.8142	-28.2549	-32.7629	-33.6028	-36.5225	-32.2873	-32.8136	-39.8486	-24.9904	-40.2261	-29.334	-28.4058	-34.1033	-31.0145	-33.4374	-34.5203	-23.7565	-31.6486	-20.5695	-11.6952	-20.6067	-31.7696	-22.4767	-22.0771	-14.9306	-15.4265	-8.62107	-10.9608	-30.3837
Cytophaga hutchinsonii ATCC 33406	-33.9128	-43.8521	-31.6692	-26.3202	-30.5966	-19.7363	-44.8733	-29.9347	-28.8915	-46.6213	-19.5325	-25.0523	-33.5364	-27.8477	-22.7595	-31.6054	-22.5319	-30.8983	-29.8348	-33.6292	-29.3142	-22.8837	-29.5158	-39.9167	-36.5254	-40.8272	-26.5867	-39.4799	-24.388	-44.9635	-26.4977	-29.5585	-36.6491	-36.0523	-34.8753	-35.3849	-30.745	-35.6842	-27.9948	-22.5009	-31.8281	-37.9005	-33.6368	-31.8903	-25.1971	-29.8844	-27.0963	-24.7525	-33.1831
Dechloromonas aromatica RCB	-23.2497	-28.3505	-31.7769	-28.3909	-23.4758	-18.4057	-32.3322	-30.2715	-30.0906	-26.4823	-15.1934	-21.4843	-29.2583	-24.4194	-17.2143	-23.2342	-18.8208	-22.5735	-22.3633	-24.6213	-28.2049	-19.2784	-18.079	-30.2233	-29.7906	-32.0497	-25.1219	-27.6511	-19.906	-23.1385	-26.3338	-28.8472	-28.9824	-31.5964	-26.1475	-31.5382	-25.652	-35.4697	-24.0515	-21.2695	-30.6336	-31.2508	-30.3936	-25.7152	-18.3493	-21.0491	-26.3394	-19.8262	-31.3127
Dehalococcoides ethenogenes 195	-1.08671	9.9223	-1.6195	0.085097	8.86372	-6.20504	-9.83761	-4.62792	-2.87038	-5.00475	-3.82862	3.42318	-2.28573	7.11357	6.77338	4.23355	9.77013	7.04775	7.47362	5.27764	7.2249	6.10621	8.81626	8.24148	6.27311	8.03622	7.23355	8.45324	10.1274	-5.71906	4.63017	-8.11661	1.86544	3.64738	3.24557	2.25005	-5.65444	-2.75471	-12.2179	-5.87386	-6.09421	-3.3501	-2.80568	-3.88331	-5.28062	-7.86014	-7.24929	-7.10515	5.3239
Dehalococcoides sp. BAV1	3.63238	15.8129	9.30854	6.62124	14.5994	-4.83206	-2.42542	1.74105	3.38153	0.488906	-0.803728	13.3554	6.24471	14.1045	15.1872	13.1377	14.6057	10.4907	12.8952	13.9328	17.0587	14.0925	16.1628	17.5118	15.4476	15.9153	14.0584	18.6869	14.0151	3.24148	10.1654	4.00417	11.8578	14.4172	15.0626	12.1214	2.62388	6.68003	-6.31528	-2.36034	4.21428	6.99503	5.67607	2.10814	-0.417796	-5.52328	0.559168	1.04702	14.0682
Deinococcus geothermalis DSM 11300	-3.0152	-13.2557	-14.0246	-2.97835	-22.4549	-2.82348	-13.6276	-8.62823	-8.95186	-18.5959	-3.5211	-12.3556	-8.26329	-14.6979	-24.9189	-23.0723	-22.2522	-23.3137	-23.6965	-16.1639	-18.1227	-20.2536	-20.3298	-23.3777	-24.1012	-19.5919	-16.51	-23.5605	-22.4132	-13.3389	-11.4649	-12.386	-7.4133	-11.3656	-10.8415	-7.64154	-9.70074	-11.7551	-6.94534	-2.33418	-6.4131	-9.38616	-8.33083	-5.92366	-6.6406	-13.0717	-11.4792	-12.425	-10.482
Deinococcus radiodurans R1	-2.77495	-15.177	-16.7851	-4.65514	-22.139	-7.19282	-14.3451	-8.51186	-6.76885	-20.1251	-3.92215	-14.747	-11.3167	-20.1829	-23.3467	-25.6601	-22.564	-20.8923	-22.1927	-19.9071	-23.8165	-21.6368	-19.826	-29.3468	-29.0494	-24.4961	-18.984	-23.3851	-23.8612	-17.6574	-13.1274	-12.2483	-13.2784	-8.3001	-15.6645	-13.4153	-12.3411	-13.4073	-6.53743	-2.74942	-9.48298	-12.622	-15.3837	-11.5693	-13.354	-13.5703	-13.1855	-10.0963	-9.25015
Delftia acidovorans SPH-1	-16.599	-18.9438	-19.3744	-12.945	-15.4117	-8.1238	-23.8044	-17.3059	-16.7762	-20.8625	-7.76464	-17.4617	-17.3558	-17.7399	-19.1631	-19.564	-20.4165	-18.8829	-18.4473	-19.7633	-19.0997	-20.1029	-18.2487	-25.0084	-26.4944	-26.696	-17.2914	-13.3325	-17.0835	-18.2913	-15.0874	-10.8814	-19.0971	-18.3535	-18.1158	-17.2009	-21.6864	-22.1588	-17.7459	-9.26909	-15.0122	-17.4871	-17.6439	-17.4554	-9.0402	-8.86812	-7.52823	-8.41354	-12.8847
Desulfatibacillum alkenivorans AK-01	-19.5971	-6.88587	-28.5958	-19.1898	-15.8422	-12.6037	-43.8488	-27.4366	-26.009	-35.634	-13.3092	-15.1535	-33.1574	-18.3244	-13.8806	-19.1641	-8.23311	-11.5335	-11.1299	-14.1541	-12.5612	-14.8546	-16.9095	-18.2296	-19.733	-13.9448	-16.9357	-10.5414	-15.7154	-30.7967	-19.5921	-30.9758	-24.1859	-25.2372	-23.2501	-20.4221	-19.098	-19.6625	-17.9307	-12.66	-25.7219	-31.5635	-30.3897	-22.9641	-19.2667	-17.5392	-24.5524	-25.6429	-17.1389
Desulfitobacterium hafniense Y51	-10.2837	-14.5533	-16.3572	-12.9538	-18.6672	-5.44197	-28.9442	-16.1597	-15.7648	-28.9384	-6.16397	-16.0646	-15.779	-15.2036	-19.7961	-16.0452	-15.1802	-9.41914	-13.0338	-7.96132	-16.3915	-17.7811	-20.8054	-3.97977	-5.49036	-2.70646	-17.8302	-13.2964	-15.6082	-29.3211	-17.4356	-13.6968	-17.8997	-19.8883	-14.9773	-20.1782	-10.913	-11.5108	-3.67753	-7.47116	-16.3156	-21.9723	-18.9955	-12.8085	-8.01918	-13.1625	-11.2526	-9.40332	-20.9042
Desulfococcus oleovorans Hxd3	-31.3797	-11.9019	-25.3731	-24.1852	-16.6582	-18.4879	-37.7393	-26.2007	-23.4028	-37.3541	-19.2384	-18.0359	-33.1472	-18.5446	-12.6618	-21.0934	-12.7886	-19.3265	-17.5585	-17.4753	-20.3438	-15.9175	-15.1957	-26.0894	-24.7748	-26.1888	-16.3359	-19.0204	-14.1947	-35.6986	-22.63	-34.9179	-27.9537	-28.0369	-24.3072	-23.0162	-28.8346	-31.8974	-23.0093	-23.0821	-32.3302	-30.6166	-35.2159	-29.0598	-25.9154	-20.9817	-28.747	-26.6231	-23.8457
Desulfotalea psychrophila LSv54	-22.1935	-19.6795	-26.1938	-17.0229	-16.5008	-7.39693	-23.3075	-17.9901	-17.2093	-29.9746	-9.14135	-19.949	-31.8923	-20.4355	-15.5671	-16.9632	-17.7216	-10.1953	-15.4486	-12.3026	-12.1838	-17.8333	-19.0843	-18.8635	-23.5543	-16.9781	-17.2299	-14.8269	-18.0942	-25.3789	-20.4776	-24.7134	-21.7471	-21.8108	-23.1105	-22.8327	-15.6842	-16.7492	-12.864	-9.97949	-28.0699	-31.3094	-27.9603	-17.9111	-11.7432	-15.8536	-19.5742	-17.4617	-19.6639
Desulfotomaculum reducens MI-1	-7.44463	-8.97926	-11.4354	-6.24168	-12.7127	-2.5196	-19.8905	-11.2739	-12.4701	-24.4867	-4.27222	-10.0658	-8.23592	-16.5822	-12.6944	-12.1382	-13.8115	-9.3718	-10.5964	-12.5351	-12.3991	-10.9464	-11.2341	-13.1676	-16.8511	-13.2617	-15.3724	-13.0876	-14.2293	-17.8099	-17.6826	-14.9889	-9.02551	-12.1156	-13.3756	-9.07993	-11.8868	-13.9485	-8.06003	-4.11799	-14.421	-13.724	-14.3049	-10.1113	-4.9753	-9.02666	-11.8072	-6.67921	-10.9089
Desulfovibrio desulfuricans G20	-12.8729	-7.80682	-23.6351	-8.28765	-14.5689	-4.71651	-32.7727	-20.8937	-19.8546	-34.5369	-7.51253	-10.0385	-26.4843	-12.8295	-10.7448	-15.5851	-12.5224	-7.87663	-10.8177	-11.5981	-5.28609	-10.8709	-6.49773	-10.8758	-10.4857	-5.78902	-15.5696	-11.4437	-15.3716	-28.8978	-20.4713	-28.519	-20.6084	-20.0058	-15.8365	-15.3495	-20.717	-19.6592	-15.9634	-8.47825	-25.7738	-25.8315	-23.5839	-18.8643	-17.1622	-13.8517	-22.0593	-22.72	-13.1483
Desulfovibrio vulgaris subsp. vulgaris DP4	-8.27174	-4.56807	-21.2841	-9.20821	-8.68982	-3.94804	-24.2034	-13.9288	-13.2302	-23.1104	-7.65697	-8.49134	-20.6202	-13.8655	-10.0674	-14.2763	-7.36132	-4.51317	-7.8687	-12.4185	-8.36088	-10.3869	-9.50133	-13.7094	-13.426	-9.90141	-14.6741	-6.84221	-10.5682	-25.7854	-20.6925	-23.6797	-18.7074	-15.6822	-15.1213	-13.9051	-16.9195	-19.9799	-14.1452	-7.47406	-22.775	-22.8018	-19.6872	-17.1453	-15.8824	-9.23795	-22.7178	-22.6528	-12.7438
Dichelobacter nodosus VCS1703A	-18.2259	-37.0592	-25.6508	-20.8592	-31.1085	-9.72801	-39.1335	-24.5073	-24.9308	-42.1925	-14.4086	-23.8218	-23.911	-29.525	-28.7991	-29.3593	-25.3237	-29.3631	-31.6716	-30.7529	-28.5677	-26.1189	-28.7796	-33.4963	-31.6279	-33.2472	-27.6871	-36.6603	-25.1568	-38.2857	-25.1354	-26.8837	-30.0157	-31.5108	-28.861	-30.8046	-18.5893	-23.786	-16.5057	-11.1955	-26.0221	-28.1501	-26.4757	-23.916	-13.2569	-14.3984	-17.2214	-15.6348	-32.9428
Dictyoglomus thermophilum H-6-12	6.35156	6.49681	7.73454	8.5961	-1.04988	3.59165	-5.70838	-5.85728	-5.93088	-8.92158	4.10499	3.64116	3.21178	1.18523	1.24809	-8.07411	-0.333312	-0.414465	-2.47408	-2.42592	1.30618	0.0421139	3.47865	-2.89531	-1.8081	-1.46052	1.35523	5.21797	-0.653626	-3.31007	-5.04147	3.83005	6.2119	8.35922	9.94759	6.8514	6.76441	10.3009	4.50696	3.70157	2.7464	14.6034	5.85009	4.20368	3.85294	9.02207	3.24049	1.79879	5.99328
Dictyoglomus turgidum DSM 6724	11.5087	8.99668	10.3338	13.1552	2.13977	5.12211	-2.37762	-0.39241	-0.553823	-4.5894	5.03906	5.23217	4.82855	4.2906	4.19987	-1.71883	3.82786	2.54165	1.14993	-0.332451	5.48601	1.78442	6.35575	0.386414	-1.54674	-0.497986	4.45634	10.5401	2.96266	-2.67423	0.622723	4.64974	11.821	9.79954	12.373	10.3195	9.83309	14.9646	8.02642	3.34313	5.1993	11.9972	9.38155	7.92901	4.16078	11.5178	5.3483	2.1891	11.4412
Dinoroseobacter shibae DFL 12	-7.29769	-19.4034	-17.8154	-13.4286	-21.5057	-6.42991	-6.45945	-9.31797	-9.13212	-11.5859	-8.21678	-8.49873	-18.3191	-19.4388	-18.2293	-23.255	-23.8301	-21.5958	-22.3807	-18.6551	-23.235	-12.2913	-17.0978	-22.2678	-20.8337	-15.0915	-17.1398	-25.6916	-20.9234	-12.2153	-13.3619	-25.8922	-19.029	-18.6512	-22.192	-18.5784	-13.6833	-22.4961	-14.0895	-12.2974	-18.6977	-19.3364	-16.4559	-18.7431	-15.3898	-13.0936	-22.3841	-20.8641	-20.3519
Ehrlichia canis str. Jake	-20.0012	-20.2931	-16.2387	-16.428	-16.7331	-9.25773	-29.6257	-18.1347	-16.922	-27.8147	-9.97311	-14.998	-19.9105	-16.522	-14.4392	-16.0225	-15.6107	-14.6915	-14.0772	-16.8411	-15.6851	-13.6541	-14.79	-22.381	-21.9166	-20.5888	-16.2553	-21.0031	-14.0827	-25.9983	-15.9624	-20.1993	-20.7308	-22.923	-21.567	-20.8169	-20.8969	-22.1196	-14.2595	-11.4903	-21.1368	-22.1793	-21.269	-20.4824	-17.4085	-18.2643	-14.4664	-14.1095	-18.4483
Ehrlichia chaffeensis str. Arkansas	-23.0829	-26.0599	-21.1011	-20.0327	-21.365	-11.5296	-35.8337	-23.5179	-22.098	-33.895	-12.6809	-19.2355	-24.6709	-20.8191	-18.9024	-19.8188	-18.6125	-17.9455	-18.0693	-20.8293	-20.6013	-16.6845	-18.6426	-28.3784	-27.6869	-26.3858	-20.2577	-26.9388	-16.4869	-31.8674	-19.5466	-23.2035	-27.1478	-28.6124	-27.0302	-26.0585	-24.4523	-25.7657	-17.9221	-13.8812	-25.8848	-28.6403	-25.1726	-25.7101	-21.1978	-21.0264	-17.8588	-16.2417	-22.4128
Ehrlichia ruminantium str. Gardel	-19.5466	-20.0514	-16.8461	-16.0301	-17.2856	-9.56879	-31.46	-19.6853	-18.4416	-29.6216	-9.33516	-16.3561	-20.5203	-16.0135	-14.8227	-16.4375	-14.9239	-16.191	-16.5211	-17.4504	-15.278	-11.9836	-15.2308	-24.1148	-22.6176	-22.2987	-17.7082	-20.7463	-13.4663	-27.7531	-16.3841	-17.8273	-23.4274	-21.6729	-21.2747	-20.4857	-20.4687	-22.6603	-14.7578	-11.8179	-20.751	-24.9135	-20.9031	-20.9889	-17.9001	-17.6691	-14.059	-13.6465	-19.0767
Enterobacter sakazakii ATCC BAA-894	-16.9401	-21.1081	-20.3244	-16.9294	-25.8964	-6.75491	-31.1874	-24.9317	-23.6784	-29.9817	-6.52791	-15.6874	-16.1273	-23.6923	-22.423	-23.5239	-19.9501	-18.8833	-25.605	-24.0969	-18.628	-23.4586	-22.34	-23.849	-19.3957	-21.6373	-20.3725	-26.2252	-22.1515	-30.2369	-20.7283	-19.4872	-20.6471	-20.3813	-17.782	-21.1089	-17.0946	-18.8398	-8.60051	-9.6728	-24.553	-24.4928	-20.2862	-19.1059	-10.928	-8.71179	-11.9844	-15.368	-20.8687
Enterobacter sp. 638	-14.4528	-18.5744	-16.9395	-12.5503	-19.6017	-3.50818	-24.8728	-19.4678	-18.2657	-22.9218	-5.29229	-16.5451	-15.5154	-21.501	-18.2773	-23.3215	-17.86	-17.6672	-18.4363	-21.7637	-19.3318	-23.3328	-19.1577	-22.4107	-22.9719	-22.2255	-16.1972	-24.822	-20.9795	-21.4634	-18.4523	-12.0371	-15.1795	-15.8281	-16.3357	-16.7078	-11.784	-17.5808	-8.2127	-6.38767	-18.9049	-19.614	-20.6572	-14.8325	-5.52068	-2.23913	-2.5288	-6.9864	-16.4781
Enterococcus faecalis V583	-25.3797	-53.9019	-37.3731	-30.1852	-43.6582	-9.48785	-57.7393	-33.2007	-30.4028	-60.3541	-16.2384	-41.0359	-45.1472	-41.5446	-45.6618	-53.0934	-45.7886	-49.3265	-48.5585	-44.4753	-45.3438	-39.9175	-42.1957	-57.0894	-54.7748	-54.1888	-44.3359	-48.0204	-43.1947	-59.6986	-46.63	-43.9179	-39.9537	-40.0369	-40.3072	-39.0162	-30.8346	-43.8974	-23.0093	-12.0821	-46.3302	-51.6166	-46.2159	-37.0598	-25.9154	-11.9817	-28.747	-26.6231	-40.8457
Erwinia carotovora subsp. atroseptica SCRI1043	-16.0705	-20.2499	-20.4262	-15.03	-15.9736	-8.82111	-27.5432	-20.054	-21.787	-27.2663	-4.5905	-17.7247	-17.2898	-20.7426	-20.4608	-23.5764	-17.9733	-16.939	-15.6487	-17.1841	-19.7052	-21.4912	-16.3873	-19.9635	-17.5065	-20.7451	-15.4182	-15.3314	-20.1966	-25.4423	-14.8002	-18.6064	-20.7708	-20.5286	-14.9002	-19.2148	-16.1763	-13.9074	-11.7045	-4.74945	-19.7255	-21.7296	-19.4536	-16.1772	-9.03588	-4.84248	-13.1066	-11.4694	-17.9717
Erythrobacter litoralis HTCC2594	-26.7071	-35.8787	-28.7093	-26.7005	-24.1673	-12.6741	-37.9413	-16.2643	-15.6142	-35.9803	-17.3573	-22.1875	-23.8331	-23.4912	-22.735	-18.8197	-22.1158	-26.0685	-21.4834	-25.8532	-25.8314	-18.0882	-22.1182	-28.9734	-27.7051	-28.2146	-20.3074	-31.2178	-19.222	-36.8012	-20.1865	-27.0297	-29.0573	-29.9839	-31.5029	-31.3218	-21.4347	-28.4789	-18.7054	-15.1666	-22.9777	-29.8891	-22.9017	-22.6525	-18.3489	-24.8748	-25.1924	-23.1497	-30.1642
Escherichia coli K12	-14.112	-21.198	-20.6658	-17.2824	-24.3894	-6.33639	-32.9679	-19.1373	-18.9708	-29.185	-8.12609	-17.4423	-22.0833	-25.3634	-19.1708	-24.1739	-21.7936	-20.5086	-24.3128	-22.5235	-21.1176	-23.2407	-22.0247	-29.0945	-26.6661	-25.9291	-21.0701	-26.5343	-24.8555	-31.9172	-21.2521	-16.7176	-20.8479	-21.4389	-15.0191	-19.4225	-15.5617	-18.3932	-8.94227	-8.18964	-20.4491	-21.0054	-25.2143	-15.6345	-8.23246	-5.92244	-5.21104	-8.71715	-21.1996
Exiguobacterium sibiricum 255-15	-15.7362	-26.9145	-22.7392	-20.7269	-28.1947	-3.68819	-32.0059	-12.2989	-11.6463	-37.0384	-9.37281	-24.2036	-21.8738	-24.511	-29.7526	-34.8439	-28.1289	-25.092	-28.5039	-23.8828	-27.8591	-27.1041	-27.1385	-31.0119	-35.7428	-29.2505	-26.3268	-30.2504	-28.2403	-35.8521	-25.213	-29.0636	-26.0911	-27.0201	-25.535	-27.3522	-23.46	-27.5053	-16.7281	-6.18242	-22.0189	-30.936	-25.9423	-24.6784	-13.3765	-13.8933	-12.2196	-13.1758	-25.1944
Fervidobacterium nodosum Rt17-B1	-8.61002	-26.1738	-27.8411	-9.9803	-40.0586	8.06425	-27.5744	-12.5599	-11.7183	-35.7871	0.965569	-29.9462	-27.3438	-36.9081	-36.9921	-42.9621	-34.3751	-37.6486	-36.0679	-33.5267	-37.7123	-37.3994	-37.8324	-39.8521	-42.7844	-36.7249	-33.7417	-29.6635	-40.2156	-31.8844	-32.5534	-22.5326	-19.3538	-19.3685	-21.7953	-20.8507	-8.32241	-23.2527	2.93113	7.28127	-25.9667	-27.1665	-26.7878	-15.2511	-4.9636	7.46162	-6.76934	-9.93935	-22.7279
Flavobacterium johnsoniae UW101	-32.2087	-42.4735	-28.3001	-32.8973	-28.6253	-19.4034	-50.7293	-31.093	-29.706	-52.7722	-20.129	-29.0436	-29.6881	-29.1751	-27.7759	-34.0168	-29.1676	-29.3913	-32.0107	-37.9148	-35.3505	-25.7635	-28.7804	-42.9193	-40.4317	-39.649	-31.8051	-40.2377	-28.5827	-45.2067	-24.3978	-25.63	-33.831	-36.8047	-36.9118	-37.1197	-19.8686	-28.4744	-21.6171	-20.4261	-31.2181	-35.8316	-26.901	-26.7709	-22.9596	-33.0748	-20.1811	-18.346	-35.8477
Flavobacterium psychrophilum JIP02/86	-29.0399	-42.6402	-29.2437	-29.2662	-31.8479	-15.9507	-41.1985	-20.0883	-20.8422	-46.0894	-21.2359	-31.0235	-27.689	-32.5645	-31.173	-37.5924	-29.3816	-33.4778	-31.226	-38.2284	-37.4698	-27.8937	-39.1148	-44.453	-43.3	-42.2426	-30.4168	-40.0901	-28.6441	-42.6908	-25.1069	-24.8594	-35.0276	-35.7084	-35.8198	-36.8764	-27.9202	-33.1643	-25.2967	-21.1469	-26.8648	-32.1034	-28.8442	-29.7368	-17.7785	-25.6336	-14.8719	-16.8043	-34.7315
Francisella philomiragia subsp. philomiragia ATCC 25017	-14.7016	-14.5783	-7.34177	-8.46302	-9.13533	-5.43401	-19.8001	-6.93251	-6.00445	-23.0128	-10.9272	-14.4328	-2.86651	-12.897	-19.8319	-6.17808	-16.4151	-16.4956	-13.565	-11.5101	-12.779	-13.0344	-13.6006	-12.9996	-11.9121	-13.5593	-7.72711	-19.8698	-11.7286	-11.4058	-7.11925	-4.2504	-13.8649	-11.715	-15.126	-11.2227	-7.30275	-6.79185	-8.53525	-5.32605	-5.32924	-6.47138	-4.22667	-5.87435	-3.20273	-12.0032	-3.81151	-1.2578	-12.0806
Francisella tularensis subsp. holarctica	-21.6889	-28.2871	-25.9573	-19.0703	-30.1903	-8.97418	-39.7053	-22.6713	-21.8277	-43.9186	-17.0832	-29.0645	-20.4584	-31.04	-32.1195	-25.1237	-31.5097	-33.7749	-34.2125	-33.6558	-28.8439	-28.5213	-29.9574	-37.0106	-32.9423	-32.8756	-30.8731	-36.7987	-26.3339	-39.0241	-26.6704	-16.6538	-28.47	-30.4801	-31.9071	-32.9638	-16.4257	-22.397	-15.1322	-6.75984	-20.0771	-24.2753	-21.9004	-19.3708	-13.0463	-14.5757	-12.8475	-11.0247	-29.8402
Frankia alni ACN14a	-23.2084	-27.5914	-28.8825	-18.4148	-21.7884	-14.4412	-37.6323	-19.8337	-20.2455	-38.2093	-14.0346	-17.6878	-32.0846	-18.0402	-29.3622	-33.8471	-22.5538	-29.0956	-26.6671	-29.1457	-28.4418	-22.281	-28.4776	-33.4848	-33.9665	-30.1643	-17.5428	-26.8421	-16.3493	-36.1852	-22.4021	-29.4649	-28.6615	-25.0421	-24.6489	-27.6889	-22.0561	-24.4926	-18.2465	-14.6415	-25.7956	-30.6799	-28.4101	-21.7657	-18.4986	-19.7856	-28.1419	-24.8968	-27.3491
Frankia sp. CcI3	-20.1364	-32.3215	-29.4775	-18.0808	-27.0124	-13.8546	-37.724	-26.1156	-24.8416	-34.4106	-11.6221	-19.7434	-29.3718	-17.768	-22.4797	-30.6028	-23.985	-28.9668	-31.6705	-28.2279	-30.7441	-22.5076	-28.411	-37.0211	-39.5621	-38.7993	-18.4412	-25.385	-16.2193	-32.5459	-22.8362	-29.6664	-26.8332	-25.603	-25.9597	-26.2682	-23.2174	-27.9413	-18.7571	-15.7883	-25.8127	-31.8497	-29.5382	-22.213	-21.0903	-21.9094	-27.1684	-24.5206	-28.0236
Frankia sp. EAN1pec	-16.557	-32.968	-24.1974	-22.6927	-25.0267	-15.6224	-41.6756	-29.1417	-27.5221	-35.9696	-12.1866	-19.8412	-29.5066	-22.2414	-23.4951	-33.036	-22.6493	-31.2241	-31.8123	-24.3781	-28.6524	-22.4011	-28.626	-33.7684	-34.2509	-36.4471	-19.71	-29.1556	-19.5276	-31.6947	-21.5961	-29.8224	-23.9954	-28.4445	-26.9624	-26.9816	-29.2794	-30.7071	-27.5345	-16.8537	-28.2467	-34.3676	-31.8543	-27.9559	-28.758	-17.3508	-24.5034	-27.1842	-25.6267
Fusobacterium nucleatum subsp. nucleatum ATCC 25586	-18.2521	-37.1469	-36.9363	-27.2579	-48.1219	-10.6602	-49.2778	-31.5237	-30.5068	-48.4431	-11.4557	-34.8028	-42.6298	-42.6528	-46.4835	-46.9691	-50.0728	-48.2597	-46.7217	-39.453	-50.7526	-46.521	-49.2506	-45.9082	-46.8046	-43.2007	-42.4923	-45.9815	-47.1702	-51.0111	-39.7819	-43.0601	-31.5018	-28.2475	-31.6031	-31.7133	-27.4533	-37.0901	-15.5499	-10.6499	-42.9723	-42.0921	-41.9156	-30.5247	-17.8631	-10.2277	-25.29	-22.9432	-32.5665
Geobacillus kaustophilus HTA426	0.15489	-9.62601	-9.73408	-5.4373	-22.8252	-3.20733	-5.22608	-3.81336	-3.87642	-7.37718	1.00666	-12.6595	-8.12675	-14.3376	-15.3381	-20.0244	-20.2542	-14.2838	-19.3446	-15.7658	-17.53	-15.5151	-18.0026	-20.7812	-18.4229	-19.7671	-18.101	-15.4827	-16.9226	-4.18664	-15.7569	-9.47797	-2.53977	-5.79557	-2.81779	-10.416	-1.97082	-7.98167	0.844159	-0.897527	-5.36488	-13.0701	-5.20865	-4.16253	1.74997	-4.04201	-9.10608	1.12973	-6.22931
Geobacillus thermodenitrificans NG80-2	-0.374228	-8.07711	-4.30664	-3.04003	-20.4641	2.02462	-3.08808	-2.30419	-2.41285	-10.3987	-0.752583	-12.4704	-5.49602	-13.0951	-15.1337	-21.7429	-18.116	-15.9908	-16.107	-14.3645	-20.1629	-17.3352	-18.7567	-22.2544	-17.9103	-18.2755	-16.8682	-14.0248	-16.7006	-9.39295	-9.40879	-5.98639	-3.03803	-3.23466	-2.33975	-9.97495	-3.61501	-5.64885	1.21312	0.365993	-3.71418	-4.27467	-5.57222	-4.82141	-0.825334	-0.690437	-0.669487	2.52594	-8.79406
Geobacter bemidjiensis Bem	-15.7633	-16.8101	-21.3816	-17.0057	-16.1664	-7.16122	-28.0541	-17.794	-16.6637	-29.4348	-8.95486	-10.3338	-21.6377	-15.2189	-17.0573	-20.0168	-12.7223	-15.3396	-15.181	-14.2715	-11.8921	-14.1425	-13.8836	-18.7626	-19.3449	-17.6182	-12.9356	-18.2346	-13.7249	-26.3541	-16.041	-22.3863	-16.5044	-22.0384	-18.6913	-17.1262	-13.3299	-16.1952	-13.6661	-6.9881	-19.9804	-21.3877	-23.7587	-14.4258	-11.9347	-12.609	-14.8864	-15.4395	-12.9099
Geobacter lovleyi SZ	-24.5007	-24.3819	-31.3138	-21.9823	-20.3065	-12.5316	-36.8401	-20.5075	-19.5057	-36.7509	-14.3255	-19.9063	-28.9958	-17.657	-18.6035	-21.3902	-15.4302	-18.6693	-17.6533	-23.3036	-25.0194	-17.7476	-18.3248	-28.4882	-29.1096	-30.427	-18.4059	-22.1017	-15.2144	-28.2816	-20.2197	-29.147	-30.2256	-30.5697	-26.4715	-31.016	-21.4515	-26.4214	-19.6706	-16.267	-28.2654	-28.1894	-28.0881	-21.6169	-14.8343	-19.5512	-20.714	-19.4146	-29.8204
Geobacter metallireducens GS-15	-19.8068	-19.5815	-25.6996	-19.4051	-12.7963	-8.18842	-33.1328	-16.7722	-14.839	-34.2973	-13.9738	-14.6444	-22.0756	-15.3183	-12.3219	-18.0021	-11.2433	-16.2605	-16.3258	-19.7336	-14.5006	-13.5009	-7.98303	-20.739	-16.3818	-21.7276	-15.0825	-13.4459	-11.905	-28.1223	-16.7291	-21.4383	-26.4992	-27.7501	-22.7791	-23.3804	-14.9422	-13.9551	-12.1258	-9.87602	-22.312	-24.0051	-23.157	-14.1352	-13.2156	-15.013	-16.0705	-16.8382	-22.1942
Geobacter sulfurreducens PCA	-15.3742	-14.0771	-24.3066	-15.04	-14.4641	-7.97538	-31.0881	-17.3042	-16.4128	-28.3987	-10.7526	-11.4704	-22.496	-13.0951	-13.1337	-15.7429	-11.116	-9.99075	-12.107	-16.3645	-15.1629	-13.3352	-11.7567	-16.2544	-14.9103	-18.2755	-11.8682	-11.0248	-13.7006	-21.3929	-17.4088	-20.9864	-20.038	-20.2347	-16.3397	-18.975	-14.615	-16.6488	-14.7869	-8.63401	-22.7142	-23.2747	-23.5722	-11.8214	-10.8253	-14.6904	-18.6695	-16.4741	-14.7941
Geobacter uraniireducens Rf4	-15.7762	-23.9291	-24.1957	-21.8023	-11.7983	-7.67175	-29.7423	-19.7767	-18.5407	-32.6242	-11.4489	-10.6401	-19.9222	-15.6285	-12.3748	-17.4569	-12.9203	-18.812	-19.5492	-18.9861	-14.5296	-10.417	-10.2796	-18.7033	-20.2549	-19.5003	-16.3143	-16.0906	-13.0942	-22.9777	-17.6367	-21.3366	-19.4906	-23.1956	-17.6327	-20.9748	-14.991	-16.7538	-15.4699	-10.5766	-17.3354	-24.1959	-24.0751	-16.0152	-15.7916	-17.55	-16.8309	-15.24	-18.7382
Gloeobacter violaceus PCC 7421	-20.9655	-30.1357	-22.3443	-20.949	-27.9115	-15.7678	-35.2566	-15.9556	-14.6996	-32.0371	-13.5401	-22.6947	-25.1591	-21.7022	-21.4304	-26.5342	-23.9546	-32.8942	-31.6136	-25.114	-29.6431	-19.465	-24.3492	-38.8714	-35.4174	-32.6584	-22.3814	-27.2459	-20.1603	-33.277	-18.7424	-24.5105	-26.6712	-23.4101	-24.8051	-27.1296	-26.1106	-30.853	-25.6208	-13.6877	-24.5866	-30.5389	-23.3189	-26.1199	-19.949	-19.7371	-20.0082	-17.3878	-26.8888
Gluconacetobacter diazotrophicus PAl 5	-24.1723	-30.1462	-15.8895	-20.531	-19.7745	-8.86562	-35.5316	-21.2001	-21.1306	-37.1721	-9.66204	-23.1409	-13.8745	-23.964	-19.8537	-24.7355	-18.5927	-22.0374	-21.9444	-25.8294	-32.4948	-17.9657	-16.6317	-27.1803	-25.7809	-27.0735	-22.6965	-25.7138	-22.4937	-34.3903	-17.6678	-18.8141	-26.9127	-26.3546	-26.1268	-22.6139	-19.9265	-22.8444	-18.1993	-9.64892	-13.181	-16.3514	-16.9806	-19.0578	-14.4238	-14.0999	-14.3372	-13.9636	-27.4079
Gluconobacter oxydans 621H	-18.7732	-27.2	-17.5144	-18.961	-17.1365	-9.25982	-24.6711	-15.6533	-15.2313	-23.2444	-10.7661	-15.2965	-17.6632	-18.2158	-16.6622	-22.9803	-15.4942	-20.4288	-18.0884	-19.6331	-25.7714	-17.2013	-15.7956	-21.8088	-20.6086	-25.3234	-16.0594	-22.718	-18.11	-26.609	-11.2582	-11.4566	-19.5263	-17.2746	-21.146	-22.1137	-18.7225	-23.5028	-14.4236	-8.59063	-9.79602	-17.2629	-10.7629	-18.8047	-11.5086	-17.1211	-4.45018	-3.44579	-20.9672
Gramella forsetii KT0803	-28.0518	-38.8653	-26.9187	-24.6101	-27.9795	-15.3094	-44.731	-23.034	-24.0768	-44.8088	-22.0984	-25.7393	-29.4019	-28.4405	-26.4241	-26.1429	-28.3117	-27.4081	-28.4447	-28.9379	-31.687	-18.5906	-30.1067	-38.0074	-36.6427	-39.9782	-28.1995	-36.6802	-25.0167	-39.5331	-24.9055	-23.6908	-30.7576	-34.0405	-35.0253	-31.6069	-21.1242	-24.1232	-17.318	-19.0137	-29.6494	-31.4214	-33.4867	-22.3083	-21.4351	-26.1999	-18.2977	-17.0428	-32.4175
Granulibacter bethesdensis CGDNIH1	-16.3374	-20.0334	-13.6125	-14.5658	-17.2268	-12.093	-20.7793	-13.4843	-13.2207	-15.6424	-11.4046	-10.2959	-9.12466	-16.8788	-18.471	-10.9966	-17.6426	-14.8214	-16.5681	-14.6168	-15.8494	-10.1718	-16.431	-17.9477	-15.7903	-14.7066	-12.7309	-15.5014	-10.9363	-10.2286	-14.4682	-17.2623	-22.4173	-18.1013	-23.1904	-19.2396	-22.2374	-27.5538	-19.5285	-11.3032	-7.29356	-11.55	-7.27285	-18.0892	-11.079	-15.7904	-15.1538	-15.0971	-20.0948
Haemophilus ducreyi 35000HP	-23.9519	-32.2272	-30.8699	-23.2277	-31.9568	-13.6146	-39.4867	-25.632	-23.8069	-38.6937	-12.6262	-25.9535	-33.3898	-32.8012	-32.9242	-35.6118	-32.2437	-28.5912	-29.856	-27.4476	-29.6105	-32.3771	-31.7858	-41.5283	-39.4657	-39.4653	-30.6393	-33.5318	-30.2244	-40.7211	-30.5773	-31.521	-33.3833	-29.4359	-31.8606	-28.9052	-28.4582	-34.0449	-20.5399	-12.3755	-32.0477	-36.2603	-32.85	-29.2508	-21.2741	-13.2268	-20.1162	-20.2263	-30.789
Haemophilus influenzae PittEE	-11.9233	-12.2934	-8.86196	-7.88758	-9.54337	-7.6187	-6.1816	-3.78954	-3.01258	-3.36224	-5.35679	-7.8567	-9.47497	-4.33094	-11.5987	-4.45775	-9.69719	-8.30775	-4.08309	-4.10321	-6.18937	-9.20028	-8.52906	-6.44031	-4.398	-11.5694	-2.19458	-8.0094	-11.143	-9.1682	-3.58734	-14.4006	-7.37776	-6.54818	-9.95846	-7.96808	-8.77009	-8.29871	-9.89926	-8.31378	-10.2401	-12.4864	-10.9794	-9.15683	-6.15269	-7.26159	-8.09041	-6.01862	-7.87946
Haemophilus somnus 129PT	-14.5439	-28.5121	-24.2129	-16.042	-26.6123	-14.39	-30.1319	-19.8795	-19.0136	-22.3498	-12.6106	-21.3366	-26.7034	-23.4557	-29.4896	-21.8686	-24.952	-22.1369	-20.7678	-22.0493	-26.2644	-26.8336	-27.3024	-22.7242	-23.6499	-21.5041	-21.2855	-27.257	-23.6077	-28.5431	-20.9388	-28.9651	-25.7258	-23.6878	-24.1147	-26.1846	-17.5398	-25.9532	-16.817	-12.205	-23.277	-27.4582	-26.1233	-23.6635	-17.9424	-10.9802	-16.6928	-15.9476	-25.054
Hahella chejuensis KCTC 2396	-17.2607	-16.6476	-18.9284	-12.456	-20.8229	-5.46847	-34.7893	-20.8795	-21.2865	-29.3241	-9.0575	-15.7095	-24.1476	-17.0687	-18.381	-12.874	-15.5672	-13.1144	-13.6878	-16.1798	-19.4725	-21.298	-14.4989	-16.5266	-16.0083	-13.2059	-17.5666	-21.8879	-19.3746	-28.2617	-20.4304	-22.5173	-20.7109	-19.102	-18.6954	-16.7321	-13.0889	-16.5234	-12.2897	-8.67342	-28.8631	-29.783	-27.4765	-15.7934	-12.5377	-5.86855	-14.1957	-13.9393	-18.3901
Halorhodospira halophila SL1	-12.9796	-23.5604	-16.1686	-15.2053	-16.7706	-5.92192	-22.0813	-11.0079	-10.7652	-28.9777	-10.2017	-9.96756	-15.6008	-15.5001	-17.1118	-15.5096	-14.3278	-13.4075	-12.1558	-13.1492	-18.3924	-15.8366	-16.0501	-16.3523	-16.2001	-15.148	-17.3524	-21.0064	-14.5842	-18.5818	-12.0332	-18.7775	-20.9484	-20.6287	-19.7445	-18.8025	-13.8556	-13.0847	-12.2497	-10.1153	-16.7779	-18.0131	-17.7574	-7.66496	-10.7176	-15.602	-10.8147	-11.7449	-16.6576
Helicobacter acinonychis str. Sheeba	-12.9021	-22.2626	-19.8304	-16.8629	-18.5076	-7.60822	-29.1473	-15.7599	-13.9835	-24.3276	-7.34341	-15.8242	-15.4447	-17.2943	-19.5638	-23.4146	-19.6599	-20.2733	-20.0435	-21.0681	-23.1534	-17.167	-20.4949	-23.3975	-24.3555	-24.5286	-19.1583	-22.9723	-22.1107	-22.1313	-12.5563	-14.368	-21.3462	-23.5178	-21.9279	-22.9372	-13.7418	-22.2594	-14.882	-8.30263	-19.2109	-24.4575	-18.9495	-15.1244	-15.1305	-13.2514	-13.0691	-10.9954	-24.8489
Helicobacter hepaticus ATCC 51449	-19.983	-12.5615	-16.3072	-16.662	-9.97452	-11.0871	-22.5671	-14.916	-15.0097	-18.7845	-9.49105	-12.4229	-15.8102	-11.7745	-9.74043	-7.76268	-9.29429	-7.39178	-9.3244	-8.36802	-7.62157	-9.98964	-10.5202	-12.5855	-10.5022	-9.21934	-8.60341	-14.6786	-10.707	-16.1151	-9.06542	-16.1611	-16.8249	-14.7104	-15.1294	-18.2185	-13.3913	-12.5304	-12.9645	-9.95295	-18.3092	-23.4631	-17.1908	-16.815	-14.4505	-13.6618	-14.1081	-14.4918	-15.0793
Helicobacter pylori J99	-10.0761	-18.1464	-13.6431	-11.5638	-12.7837	-7.20288	-23.6476	-11.8712	-10.161	-19.7793	-5.5489	-13.5396	-7.46373	-13.4255	-14.9753	-15.8122	-13.7632	-14.7222	-13.8359	-14.4213	-20.3935	-11.8122	-14.9831	-17.7508	-17.7519	-18.131	-13.3605	-19.0253	-15.8594	-18.2802	-8.50453	-7.05038	-17.1465	-17.4717	-16.8511	-16.8164	-8.96916	-17.0839	-13.5682	-6.8104	-13.3725	-19.6348	-12.0131	-11.852	-13.1951	-11.8825	-8.21407	-5.90729	-18.7872
Heliobacterium modesticaldum Ice1	-15.6265	-12.7799	-19.6262	-14.6275	-13.0911	-9.63504	-20.7627	-17.1686	-16.5253	-24.8197	-6.31435	-12.1426	-24.7203	-14.4362	-11.6858	-19.7522	-13.0791	-14.0034	-15.4265	-17.7711	-14.7542	-14.044	-17.0619	-21.8666	-23.6004	-19.1149	-16.2534	-11.1273	-12.1711	-24.6603	-20.1127	-23.9359	-13.9637	-14.8838	-10.4138	-11.2377	-15.3645	-18.4056	-13.6427	-13.1228	-25.8636	-27.7595	-24.7893	-15.5807	-12.2723	-6.8237	-18.1174	-18.0774	-11.0805
Herminiimonas arsenicoxydans	-19.5555	-21.1111	-22.5412	-21.3378	-25.805	-15.5738	-26.1493	-23.3985	-22.5844	-20.7133	-12.3298	-19.1163	-27.3872	-17.6459	-17.7493	-25.2139	-19.8502	-20.4484	-22.6602	-21.6366	-27.4929	-18.9952	-19.2991	-32.3004	-30.9807	-32.3856	-17.4341	-22.2016	-17.2878	-22.9997	-17.7719	-26.1097	-16.1478	-19.2499	-19.4919	-14.1883	-23.9754	-30.0351	-23.1466	-12.1792	-25.5757	-25.9076	-29.4568	-25.1985	-20.0774	-11.1039	-16.9101	-16.7749	-8.01621
Herpetosiphon aurantiacus ATCC 23779	-6.63704	-19.9282	-13.6262	-8.2198	-23.8645	-5.62435	-19.9649	-6.47167	-7.03988	-21.7228	-6.32764	-15.165	-13.2055	-21.3399	-24.8914	-26.1794	-20.2399	-23.5478	-23.1422	-21.1785	-24.5827	-18.864	-26.9227	-23.2611	-25.7637	-25.9749	-21.9492	-23.5725	-24.7292	-20.857	-9.61195	-11.0114	-13.2223	-8.28162	-13.2847	-12.4531	-5.12143	-8.68181	-4.96305	-4.68413	-13.7736	-20.6392	-15.4398	-4.98375	-11.2981	-9.58837	-6.59071	-9.6734	-15.1687
Hydrogenobaculum sp. Y04AAS1	-9.13525	0.399138	2.8233	-6.13333	4.09976	-4.7232	-10.5237	-3.0849	-1.30301	-6.70758	-4.49016	6.81871	6.22253	2.3038	8.05314	0.110944	8.93054	2.34858	0.521896	-0.453142	3.45234	8.46772	4.12983	2.13296	1.17773	4.02343	5.44373	1.62078	5.53455	-6.53684	3.10248	2.27368	3.30756	1.14936	1.73712	-3.27615	-0.0522114	2.30956	-5.07139	-5.42501	4.46853	2.22506	2.72229	2.52002	-0.3739	-10.3629	2.69706	-0.249796	-4.18411
Hyphomonas neptunium ATCC 15444	-23.6757	-28.429	-24.5813	-22.2949	-22.6967	-12.1238	-37.8145	-10.6311	-9.71069	-36.0243	-14.9069	-23.5926	-24.9004	-27.2516	-26.2659	-20.9249	-22.2056	-28.1799	-26.2607	-23.6228	-24.3994	-17.4516	-14.9155	-25.5935	-21.2403	-26.5919	-25.0186	-27.3192	-19.844	-28.9017	-17.6331	-23.3021	-28.3601	-30.5942	-31.6466	-30.2582	-18.8438	-27.8636	-17.023	-15.8025	-21.1311	-25.783	-23.9801	-26.0412	-20.0977	-21.9142	-21.949	-19.7282	-33.0737
Idiomarina loihiensis L2TR	-19.4171	-32.7431	-23.1037	-18.6174	-25.733	-8.08897	-33.9397	-13.1988	-12.8017	-36.563	-11.5693	-21.0292	-27.1495	-22.9002	-24.3693	-26.5802	-27.254	-30.0709	-26.7509	-25.2109	-33.3653	-27.9317	-24.4748	-34.2661	-33.073	-31.8157	-21.7458	-34.2649	-21.8165	-34.9717	-20.8698	-28.0018	-30.0813	-26.8158	-30.723	-25.705	-18.372	-20.0987	-10.1468	-9.40143	-27.2852	-28.7135	-24.2552	-15.4271	-10.1571	-17.9207	-15.1157	-17.108	-30.559
Jannaschia sp. CCS1	-5.57462	-15.7083	-20.0364	-12.6455	-20.6763	-8.56973	-13.199	-11.5847	-9.36982	-7.186	-6.35141	-10.5812	-15.669	-20.5493	-20.3144	-20.373	-19.883	-20.7224	-20.4793	-16.8481	-22.4069	-18.3649	-16.2041	-18.5217	-18.0793	-19.3298	-16.2417	-27.9236	-19.023	-13.6576	-15.5224	-25.1504	-15.2971	-17.9668	-15.4479	-15.8088	-12.8624	-17.6465	-10.3095	-11.4587	-18.0673	-15.8327	-12.8149	-17.9019	-13.623	-12.355	-19.6425	-21.0821	-16.5765
Janthinobacterium sp. Marseille	-15.5518	-21.4404	-22.3582	-21.0244	-23.3429	-13.557	-15.9674	-21.5608	-19.554	-11.8585	-10.3513	-15.9247	-23.0631	-18.681	-18.6233	-22.4174	-17.4432	-22.6982	-24.6764	-20.3444	-21.0565	-20.7649	-14.349	-31.542	-29.1618	-27.4772	-17.4288	-17.1491	-17.2363	-17.3664	-18.2547	-23.1984	-12.2784	-16.6297	-15.5219	-14.0621	-27.4883	-29.4545	-25.7107	-10.2959	-26.3353	-24.2773	-23.1563	-28.6513	-18.8795	-11.5919	-18.7614	-15.4567	-12.8657
Kineococcus radiotolerans SRS30216	-23.5526	-22.7713	-23.799	-16.3997	-15.2539	-16.0668	-41.8754	-20.5004	-20.1825	-44.3236	-10.8204	-16.8605	-25.8865	-19.9265	-21.597	-29.7662	-23.0571	-24.1377	-24.8056	-24.4999	-26.9846	-18.6087	-23.5576	-26.3777	-32.9071	-25.1357	-20.5843	-24.7196	-19.3612	-38.196	-19.0595	-25.0431	-32.2241	-31.0712	-28.3328	-28.6022	-27.4739	-31.1519	-20.0899	-8.03445	-27.3607	-24.6123	-27.0697	-25.4346	-18.4313	-14.3434	-17.5598	-19.8424	-29.3476
Klebsiella pneumoniae subsp. pneumoniae MGH 78578	-13.4915	-17.774	-9.51533	-13.1104	-20.7833	-2.54916	-14.5429	-11.3437	-9.92705	-15.3995	-4.26044	-14.1234	-10.0302	-16.2834	-14.8521	-19.124	-15.2152	-14.4953	-18.0976	-19.0894	-16.5043	-15.8298	-16.8745	-21.1459	-14.6517	-19.8648	-16.9	-16.4589	-18.679	-19.6369	-13.5397	-4.88181	-13.0897	-12.1197	-10.1584	-9.34007	-9.03583	-9.6114	-6.84534	-5.59628	-17.5852	-12.3638	-10.257	-10.9119	-3.18365	-9.4104	-3.45115	-6.56219	-12.0601
Lactobacillus acidophilus NCFM	-27.7452	-42.224	-39.963	-31.3957	-38.5874	-17.9721	-54.1616	-33.5794	-31.6801	-53.3799	-21.3462	-39.0837	-42.4612	-36.3976	-43.3741	-50.2894	-40.9157	-44.023	-45.9081	-38.9876	-43.2354	-38.6388	-40.1584	-47.1152	-47.0333	-46.7733	-37.2262	-43.2816	-39.3647	-50.6889	-36.7152	-38.7994	-42.4794	-37.3771	-39.7982	-40.8844	-35.0876	-46.1089	-24.7753	-16.8294	-39.9724	-46.1305	-41.8485	-39.462	-32.2014	-18.549	-23.8749	-27.2375	-41.7463
Lactobacillus brevis ATCC 367	-30.511	-51.2474	-47.994	-35.6629	-55.4351	-15.7417	-60.3936	-40.66	-38.5465	-64.4656	-18.7825	-46.4591	-49.9679	-50.6392	-55.3732	-63.8183	-54.8401	-52.3477	-59.0199	-46.7657	-52.0576	-52.2626	-53.1939	-59.0672	-59.9446	-60.1209	-52.4876	-55.4453	-52.9286	-65.1076	-45.8757	-46.3361	-48.6365	-47.3264	-50.5922	-50.6918	-43.1135	-55.6089	-27.3223	-14.8246	-46.2198	-50.3614	-46.1888	-45.5753	-29.1988	-12.3394	-29.4628	-27.2697	-53.5454
Lactobacillus casei ATCC 334	-20.7702	-34.4677	-29.6384	-24.9105	-32.2256	-16.739	-40.7513	-24.9083	-24.4134	-39.1688	-14.313	-29.0002	-33.0936	-34.0532	-37.4338	-41.0356	-36.1145	-39.3878	-39.9786	-38.7796	-35.8687	-31.9081	-32.6485	-42.2863	-41.065	-39.705	-33.8897	-32.9545	-32.8883	-38.3861	-33.3084	-35.7064	-29.7539	-26.5497	-31.3128	-28.2363	-35.6798	-43.5849	-25.1987	-16.1225	-28.2231	-34.8145	-31.1789	-35.8258	-21.4856	-13.6951	-17.3847	-20.3808	-33.0874
Lactobacillus delbrueckii subsp. bulgaricus ATCC BAA-365	-26.0324	-39.3431	-35.9888	-29.3199	-38.0917	-18.6539	-47.6193	-30.7454	-28.9182	-49.827	-17.6762	-36.0753	-37.5063	-37.9372	-43.0552	-46.7771	-41.3827	-41.7208	-42.0047	-43.5798	-41.7455	-40.5025	-38.9142	-48.6903	-46.6271	-48.6195	-38.7746	-42.6705	-39.3459	-48.8631	-32.6966	-38.6448	-41.5021	-38.55	-38.9751	-39.021	-31.5641	-42.1929	-19.6046	-17.4175	-36.1599	-41.3709	-38.9645	-36.3733	-25.3584	-16.2649	-23.1962	-26.3136	-39.9039
Lactobacillus gasseri ATCC 33323	-35.7086	-46.3154	-36.9863	-32.0927	-43.2232	-15.9838	-56.738	-35.6991	-33.855	-53.9514	-19.0954	-38.0941	-41.487	-43.0729	-44.1512	-51.164	-44.5433	-44.8064	-49.2485	-40.688	-44.8768	-41.5518	-42.9885	-51.0502	-50.9817	-49.9132	-42.9059	-44.8324	-41.3634	-54.059	-36.6997	-38.684	-40.499	-39.508	-38.935	-41.992	-35.4514	-46.433	-25.148	-17.7701	-38.1047	-46.3025	-41.9285	-39.4007	-29.0669	-15.585	-25.867	-27.046	-42.8682
Lactobacillus helveticus DPC 4571	-26.7317	-35.0152	-33.5773	-26.6651	-31.2207	-14.5241	-48.8728	-25.5228	-24.7503	-46.0505	-17.236	-32.5632	-37.2018	-32.0003	-36.2839	-40.0686	-34.3606	-35.997	-35.726	-33.7868	-35.8653	-33.9003	-32.2206	-37.0546	-36.0146	-38.2013	-29.8674	-32.6747	-33.8516	-44.8354	-31.3074	-34.1062	-37.0931	-34.2745	-34.6829	-36.6893	-34.5148	-41.9446	-20.7434	-16.2131	-34.9769	-41.2258	-36.71	-36.8647	-25.9527	-14.1698	-20.898	-22.8095	-36.6039
Lactobacillus johnsonii NCC 533	-37.9814	-49.1369	-41.8524	-36.5366	-48.3351	-16.6023	-60.8676	-38.4985	-37.6207	-59.0866	-20.8792	-40.979	-44.3426	-45.1699	-51.182	-55.7554	-49.6766	-48.828	-55.5541	-45.7582	-48.986	-46.497	-48.9835	-53.5977	-56.5205	-52.3335	-46.9988	-50.9979	-46.2526	-61.3231	-41.587	-44.6345	-46.366	-47.3042	-45.7297	-47.8059	-41.1061	-52.7431	-29.1666	-19.4325	-41.8933	-49.0658	-46.7508	-45.3212	-31.401	-14.1872	-31.124	-30.4184	-44.6723
Lactobacillus plantarum WCFS1	-21.0363	-23.2814	-25.046	-20.9973	-28.4743	-17.8337	-35.6747	-19.653	-18.9748	-34.6381	-15.5323	-20.3669	-32.2927	-23.7118	-24.9312	-29.0893	-26.2613	-26.3303	-28.7109	-24.185	-24.1424	-24.2647	-28.344	-28.4052	-28.1281	-30.6175	-23.5236	-28.5838	-25.4261	-35.3757	-27.4838	-26.4102	-26.4376	-22.3917	-22.8645	-24.6633	-23.7188	-33.7738	-20.9618	-17.3457	-26.4429	-31.4203	-27.3602	-22.942	-16.6605	-13.0853	-18.4988	-19.4437	-27.5036
Lactobacillus reuteri F275	-26.4345	-37.2008	-29.9581	-24.1659	-38.7054	-13.3051	-49.3403	-30.5547	-29.6349	-48.5552	-13.7653	-38.0601	-32.4735	-37.4827	-41.4289	-39.6547	-42.0026	-38.0872	-40.1069	-39.0869	-35.3504	-35.6488	-39.2013	-47.4752	-45.3893	-42.0626	-38.3123	-41.4285	-36.3511	-51.9255	-36.7283	-29.8461	-37.479	-38.342	-36.7563	-38.8503	-33.965	-40.3251	-19.3232	-14.1874	-33.9497	-34.096	-34.8413	-33.4819	-20.9232	-10.8762	-13.5503	-14.9735	-37.7092
Lactobacillus sakei subsp. sakei 23K	-24.0558	-43.6646	-33.4123	-26.7433	-43.0927	-11.1223	-50.6914	-31.0189	-31.1105	-52.9085	-13.5353	-35.5262	-33.917	-43.8893	-45.852	-47.907	-46.4094	-45.5043	-48.4512	-45.4842	-40.7394	-41.0965	-43.6305	-49.7292	-45.6455	-45.3555	-43.7183	-48.7997	-40.8113	-54.2456	-37.1724	-35.2717	-38.9304	-35.8123	-39.2306	-37.3205	-33.484	-46.6589	-25.0224	-8.99073	-37.4123	-43.565	-37.2956	-34.9228	-25.5267	-7.69631	-23.1795	-23.5695	-39.181
Lactobacillus salivarius UCC118	-28.3785	-33.9321	-33.7201	-24.3095	-30.7825	-15.2409	-48.7252	-27.2978	-25.3136	-39.9127	-15.9356	-37.6894	-37.339	-32.4092	-40.2754	-39.3748	-40.8802	-40.0002	-41.3453	-37.1239	-37.4176	-34.3696	-36.036	-43.2489	-40.1512	-40.6335	-37.245	-40.5951	-36.0269	-41.43	-33.5439	-35.7665	-36.2665	-33.0437	-37.4233	-39.5316	-31.3902	-42.6527	-19.8616	-12.1963	-31.7209	-38.844	-38.6504	-38.296	-25.9539	-13.8055	-19.4441	-20.0297	-42.3856
Lactococcus lactis subsp. cremoris MG1363	-13.3021	-16.9867	-12.5688	-16.5302	-12.182	-10.0761	-21.71	-14.4373	-12.1758	-20.5765	-11.3846	-19.2639	-23.0729	-12.8418	-17.4359	-15.949	-16.612	-16.7808	-21.5278	-11.5709	-14.8045	-13.1391	-14.3937	-12.8891	-12.7322	-16.6517	-15.6939	-14.4527	-14.9019	-25.1647	-14.4255	-14.2146	-16.3711	-13.0547	-16.1465	-18.1965	-16.1998	-20.5078	-16.5009	-15.2846	-19.2426	-20.4968	-19.2219	-16.0475	-16.0433	-8.77168	-11.1203	-13.0623	-18.0517
Lawsonia intracellularis PHE/MN1-00	-6.57128	-11.0231	-21.5503	-10.4413	-12.1553	-11.4238	-17.1974	-10.2239	-9.60607	-18.2717	-5.28644	-11.564	-23.688	-10.6154	-11.6589	-14.5129	-15.2071	-16.3168	-18.7913	-9.81887	-12.6686	-11.8355	-11.6734	-16.9835	-18.0708	-14.6391	-10.7018	-10.9448	-12.9051	-17.456	-16.8078	-18.8273	-15.9743	-14.4397	-15.7905	-15.7299	-17.3325	-19.9778	-15.6455	-10.9293	-20.7502	-21.9423	-24.2573	-18.7666	-15.6102	-7.11113	-13.6184	-12.0885	-14.8126
Legionella pneumophila str. Paris	-18.7685	-31.1693	-28.7788	-20.6495	-31.1333	-8.1897	-44.3305	-24.5045	-23.762	-46.1121	-13.9188	-25.7438	-30.3079	-33.1789	-32.3432	-34.6553	-27.5615	-30.8875	-32.1886	-32.901	-32.8108	-26.6337	-29.822	-41.3388	-42.0416	-39.4886	-30.9801	-38.3782	-31.8576	-43.6463	-24.1219	-21.2411	-29.2711	-29.2922	-33.6576	-29.4089	-28.3358	-33.4019	-23.5324	-10.7459	-27.474	-34.6115	-27.3748	-24.564	-15.348	-12.566	-18.1795	-15.0907	-27.2438
Legionella pneumophila subsp. pneumophila str. Philadelphia 1	-15.1893	-31.2411	-28.1705	-21.2292	-31.6708	-10.4234	-38.8005	-21.6457	-21.0389	-43.9516	-15.0805	-24.8925	-26.1064	-33.1305	-32.4119	-31.3762	-27.8729	-30.6428	-33.1093	-36.3191	-32.3287	-26.7968	-29.7491	-40.2794	-41.0243	-38.5668	-30.9529	-37.6309	-32.8879	-40.8937	-23.7058	-20.4226	-26.4524	-25.3389	-31.9276	-29.777	-27.9794	-32.9993	-23.3024	-11.8859	-25.2439	-31.0588	-25.1778	-24.1847	-15.8555	-14.5499	-16.71	-16.6831	-26.6223
Leifsonia xyli subsp. xyli str. CTCB07	-19.6574	-15.3207	-12.1102	-12.6133	-9.2132	-12.3748	-19.2186	-8.68969	-6.69533	-18.3997	-12.102	-9.0497	-12.7509	-10.8112	-12.6662	-10.8895	-14.268	-14.4059	-13.7904	-15.5508	-13.8469	-10.7423	-12.428	-16.7813	-13.6817	-15.1365	-10.6482	-15.0403	-9.39615	-13.9344	-7.94118	-13.1809	-17.662	-16.4287	-14.8012	-19.9105	-19.7315	-19.1158	-18.0815	-12.3411	-9.11998	-11.2415	-13.0541	-15.6908	-15.2444	-7.93984	-11.7145	-14.322	-16.7642
Leptospira borgpetersenii serovar Hardjo-bovis JB197	-27.698	-29.6313	-24.6493	-24.7771	-21.1845	-14.1861	-41.7325	-26.051	-23.484	-33.9822	-16.8163	-18.5977	-27.4129	-21.7724	-16.0889	-28.9332	-14.6261	-19.223	-20.7356	-22.7986	-28.837	-18.5043	-24.383	-37.6044	-35.3614	-35.9364	-19.6003	-30.0618	-20.556	-35.0288	-18.2352	-23.837	-28.871	-32.723	-30.3749	-27.2514	-23.538	-29.5263	-19.9202	-17.6207	-21.5459	-28.2768	-25.4882	-25.7269	-19.3842	-24.2485	-22.2518	-20.2362	-28.099
Leptospira interrogans serovar Copenhageni str. Fiocruz L1-130	-30.384	-33.2481	-28.2119	-27.886	-24.2226	-15.4738	-49.5503	-28.3852	-28.3951	-43.5054	-19.2667	-21.8637	-32.8419	-21.6016	-20.5578	-30.3272	-19.4002	-21.6026	-23.6002	-27.2096	-33.9341	-21.7077	-25.2691	-41.3647	-39.9897	-38.3116	-18.3532	-35.9932	-21.1639	-41.0876	-21.1392	-27.0293	-33.1046	-36.4325	-38.3562	-32.9104	-25.3672	-29.3451	-20.5789	-17.201	-30.1056	-34.9892	-31.9322	-24.5377	-25.7309	-26.4588	-20.6058	-22.3184	-32.7165
Leptothrix cholodnii SP-6	-14.7921	-24.9465	-32.2082	-20.8147	-21.8079	-14.6798	-20.7854	-21.7918	-20.5541	-20.6589	-12.4566	-19.6447	-30.9422	-19.6348	-22.3795	-22.4634	-16.9232	-19.819	-20.5547	-24.9969	-22.5392	-14.4211	-17.2855	-29.7175	-33.2686	-32.5137	-24.32	-25.1037	-21.0998	-19.0029	-20.6457	-32.3513	-20.5058	-24.2137	-20.6472	-19.9878	-25.0011	-27.7622	-24.4825	-15.5859	-27.3566	-28.2247	-31.0957	-22.024	-16.8049	-14.5656	-25.8458	-19.2525	-16.7509
Leuconostoc mesenteroides subsp. mesenteroides ATCC 8293	-9.24607	-9.74719	-6.5343	-5.16484	-12.5769	-10.1773	-9.49159	-12.1115	-11.132	-9.6819	-8.85647	-9.51671	-8.14343	-10.2166	-13.0882	-14.1285	-15.6937	-14.8064	-17.1321	-15.9204	-15.2127	-14.1909	-10.8484	-9.99517	-9.8983	-12.3937	-11.0519	-8.38286	-13.8502	-7.19063	-11.3545	-11.5693	-7.07819	-4.86059	-6.24339	-7.35111	-9.22748	-13.4314	-13.7571	-10.1276	-3.53147	-5.65555	-4.45868	-10.1076	-7.81589	-5.74173	-9.31561	-6.89058	-7.20531
Listeria innocua Clip11262	-15.9374	-17.1607	-13.9453	-16.9084	-11.3828	-6.78575	-22.4537	-7.53665	-6.86697	-17.4402	-10.4798	-17.3137	-18.1548	-9.64627	-17.873	-14.0093	-16.2183	-14.2524	-16.6434	-13.086	-12.0497	-12.2124	-15.2769	-17.2763	-15.0018	-14.4972	-13.4594	-15.4744	-13.3655	-17.2033	-18.3952	-14.2964	-24.3237	-20.2694	-19.7562	-22.5612	-15.6339	-18.6861	-12.8848	-9.29183	-15.3033	-19.2605	-16.2226	-16.8557	-14.5671	-14.0217	-10.4068	-9.35562	-21.4021
Listeria monocytogenes EGD-e	-12.4176	-16.2813	-8.3474	-13.517	-8.90028	-6.05082	-16.1289	-5.70835	-6.16354	-16.4318	-9.66481	-18.4229	-16.0155	-8.56105	-16.8972	-13.6704	-15.4779	-13.9764	-15.5139	-11.4956	-7.54978	-11.3303	-13.167	-15.2119	-12.9757	-13.5699	-12.3918	-11.7317	-12.3599	-15.5336	-16.9604	-11.4987	-18.536	-16.3698	-17.0564	-16.9477	-12.282	-18.2484	-10.7021	-7.46982	-14.1467	-15.8329	-14.0934	-15.4596	-13.1137	-12.0791	-8.98998	-6.97921	-17.7965
Listeria welshimeri serovar 6b str. SLCC5334	-12.7969	-18.5013	-12.6679	-14.9356	-13.2539	-5.75181	-15.8076	-5.94148	-6.44455	-16.2207	-9.32758	-16.0182	-17.1317	-9.07466	-17.4535	-14.0625	-15.1301	-14.4126	-15.0013	-8.80956	-8.8973	-10.9261	-14.6704	-16.325	-13.1031	-14.7412	-11.911	-14.987	-11.9083	-15.4335	-16.3358	-14.7393	-20.7863	-20.5837	-17.3437	-17.2659	-12.7049	-17.6129	-12.2195	-9.13683	-15.2612	-18.8563	-14.2166	-14.8523	-13.5116	-14.7108	-10.4097	-10.4056	-18.1169
Magnetococcus sp. MC-1	-23.6317	-32.5319	-31.4276	-27.0902	-26.3997	-12.5966	-36.1671	-24.6441	-24.6292	-35.0271	-18.3915	-20.9534	-28.1682	-27.7184	-20.654	-25.4598	-15.4633	-26.7432	-19.7121	-29.4081	-26.1142	-20.7917	-23.3865	-37.6258	-35.2432	-35.5555	-25.4643	-32.2229	-22.2704	-31.499	-23.3092	-31.2786	-35.3609	-34.7235	-32.6005	-31.134	-26.5456	-29.5061	-23.7736	-17.3413	-29.4447	-33.4149	-30.2629	-28.7048	-21.9501	-22.656	-26.8355	-23.5225	-29.9365
Magnetospirillum magneticum AMB-1	-21.2789	-26.476	-30.588	-21.1903	-22.0958	-14.9272	-38.1162	-22.2482	-20.9592	-37.7227	-19.6902	-19.7838	-25.5487	-22.8225	-18.5203	-26.6593	-18.01	-22.0263	-19.7174	-28.3219	-29.8273	-20.5426	-20.4618	-36.1444	-36.6815	-35.9156	-24.4906	-33.5002	-22.2682	-29.7693	-22.9135	-31.7959	-22.9677	-27.7636	-23.0881	-20.3832	-20.3058	-26.0141	-20.871	-15.8724	-25.0008	-31.11	-29.7206	-18.2897	-14.2076	-23.0556	-26.3023	-22.6311	-21.1352
Mannheimia succiniciproducens MBEL55E	-17.5135	-12.9413	-17.5839	-14.7326	-18.1655	-11.699	-25.1794	-18.3836	-17.1674	-20.1159	-9.93625	-16.5263	-20.917	-15.993	-19.6294	-18.8565	-17.9006	-15.8568	-14.6026	-8.53107	-16.7866	-16.3854	-19.5411	-10.5664	-14.4206	-14.4103	-14.8453	-18.3533	-16.1128	-25.7383	-13.4574	-23.1403	-16.3331	-20.0105	-17.1591	-17.2277	-19.3521	-19.4601	-15.8864	-12.8708	-18.106	-21.3166	-17.0849	-20.103	-14.2453	-7.35876	-13.3724	-16.2834	-20.0826
Maricaulis maris MCS10	-19.0783	-36.3327	-28.0887	-22.035	-28.513	-9.85412	-37.7689	-17.7024	-17.0206	-39.7223	-13.5546	-21.3893	-24.3512	-29.7395	-26.9558	-30.123	-23.2794	-32.3632	-29.7393	-31.2269	-31.1817	-25.2868	-27.3724	-40.4598	-41.1816	-37.6685	-30.5507	-34.6301	-25.4517	-35.4489	-20.5213	-26.4585	-29.4859	-28.4436	-29.9105	-30.7066	-20.7548	-26.8109	-18.9945	-11.3686	-25.5022	-25.4883	-25.4186	-20.9785	-20.7002	-18.1124	-17.5379	-17.4811	-35.5466
Marinobacter aquaeolei VT8	-19.5438	-24.6745	-26.0119	-22.6214	-25.6575	-12.5541	-34.1163	-26.5552	-25.3435	-26.1191	-14.3365	-11.5721	-31.6302	-19.5371	-22.3051	-18.3601	-17.8772	-17.7085	-16.4685	-17.8268	-25.388	-22.3568	-20.1924	-25.4937	-26.0522	-23.3035	-17.2304	-18.898	-22.012	-29.6085	-18.5047	-32.1217	-23.2674	-21.9317	-21.4196	-22.7833	-19.8426	-23.63	-19.285	-12.4407	-34.0263	-35.7773	-34.775	-20.8844	-17.5972	-15.3255	-23.6137	-23.0579	-20.5517
Marinomonas sp. MWYL1	-17.9883	-18.1605	-21.362	-18.9666	-15.925	-7.77934	-16.3186	-12.9769	-13.7186	-17.0867	-7.55105	-17.7012	-17.1874	-15.7109	-23.437	-17.5434	-17.9587	-14.9039	-15.6212	-12.1292	-13.6566	-18.4707	-15.3575	-16.8914	-16.4368	-16.6772	-17.3894	-24.2645	-19.1682	-15.3128	-14.7549	-17.5313	-20.6928	-14.4357	-17.8257	-19.1481	-16.1248	-17.8648	-13.6389	-5.70109	-20.6167	-22.5801	-18.3481	-16.1324	-13.9679	-10.7598	-17.0295	-15.4055	-14.9068
Mesoplasma florum L1	-22.2945	-31.99	-26.6605	-23.491	-32.8939	-11.4428	-38.2503	-21.9125	-21.009	-35.8847	-12.8676	-26.7992	-29.0453	-30.3516	-31.0803	-31.5039	-29.8508	-32.3209	-31.329	-32.4334	-32.4955	-28.6794	-28.9382	-34.0455	-34.8786	-34.4236	-30.3783	-33.3978	-28.6531	-33.9301	-27.0815	-26.4125	-29.1866	-29.6557	-29.8673	-29.586	-25.5629	-29.5168	-18.8119	-12.5133	-27.1417	-29.7218	-28.124	-24.9349	-18.4088	-15.9399	-19.2749	-20.7457	-29.5985
Mesorhizobium loti MAFF303099	-2.61035	-14.0263	-11.2478	-10.7361	-18.0652	-7.65001	-12.8344	-9.18961	-9.56531	-15.085	-4.20973	-13.8668	-22.5718	-16.2747	-22.5171	-15.0672	-20.6654	-20.2446	-20.8363	-16.415	-15.6861	-16.4212	-16.6503	-16.813	-6.29585	-13.4918	-14.7376	-20.2056	-15.5572	-15.7728	-17.6272	-22.8792	-8.0476	-8.50685	-11.0113	-11.0276	-17.3147	-21.742	-15.5786	-7.88606	-18.3161	-14.4731	-17.9229	-20.9862	-14.7976	-11.4399	-16.5596	-18.2292	-15.6704
Mesorhizobium sp. BNC1	-12.2415	-20.4354	-15.559	-13.1616	-23.0739	-6.90811	-15.0129	-17.2134	-15.9284	-16.6406	-7.67235	-21.7732	-22.5022	-19.8082	-21.5097	-20.6445	-20.0034	-20.0108	-23.7051	-19.2973	-17.8055	-20.5334	-16.4485	-25.1121	-18.6502	-21.8851	-19.4777	-18.47	-23.2554	-22.7107	-17.8933	-27.7619	-14.9324	-14.7214	-13.0544	-13.353	-20.2827	-21.995	-17.841	-10.8503	-17.9513	-18.0414	-16.6727	-26.2696	-17.1768	-8.01692	-20.2671	-19.6021	-13.1059
Methylacidiphilum infernorum V4	-16.7438	-18.5681	-17.1113	-16.9725	-15.7362	-9.28742	-28.5779	-15.0221	-13.734	-23.4007	-10.6341	-12.658	-15.7185	-16.2979	-12.8673	-18.5345	-12.9864	-17.282	-21.0231	-17.1404	-17.36	-13.5409	-8.85317	-23.6154	-20.4517	-20.3328	-14.1494	-21.0566	-12.326	-20.9623	-11.9547	-14.8083	-20.9462	-20.6361	-18.6933	-19.7315	-17.6659	-20.0756	-15.8449	-12.5169	-13.8789	-16.1623	-14.8575	-20.5633	-13.4881	-17.0063	-17.5383	-14.4949	-22.5867
Methylibium petroleiphilum PM1	-15.0134	-19.1878	-26.3816	-19.986	-19.9398	-12.7921	-24.3871	-22.0005	-20.7395	-22.1415	-10.5631	-13.7084	-27.2187	-18.7206	-18.4443	-18.5535	-18.9632	-18.9147	-22.6296	-22.146	-22.6715	-17.477	-19.3666	-30.9135	-30.4581	-28.698	-17.3982	-24.285	-18.1769	-22.3524	-17.7688	-25.5542	-21.7167	-23.4641	-21.8485	-20.1685	-19.1406	-27.8778	-20.6589	-14.7158	-20.6499	-29.6257	-22.3803	-26.1461	-16.9887	-9.78498	-22.053	-20.425	-18.9266
Methylobacillus flagellatus KT	-25.6087	-21.2635	-22.4589	-22.7579	-22.0533	-14.6613	-22.4109	-20.7068	-21.224	-19.8554	-14.2248	-14.8906	-20.8627	-17.9221	-22.3136	-21.8711	-18.0191	-21.2367	-20.8398	-19.5974	-22.6949	-19.7983	-15.5148	-26.0512	-25.8334	-28.4852	-14.7599	-24.7575	-15.7665	-25.099	-19.142	-23.5063	-24.5568	-27.3441	-27.1256	-28.0567	-25.5272	-27.4146	-24.0731	-14.0361	-21.9922	-23.5617	-24.9501	-18.664	-16.3281	-17.6008	-21.2335	-21.2304	-26.9082
Methylobacterium chloromethanicum CM4	-13.9779	-23.2885	-24.8874	-22.4761	-14.0553	-12.8009	-23.9618	-16.7692	-17.3022	-15.481	-10.484	-12.265	-18.6145	-14.4753	-18.9846	-18.3109	-21.2993	-21.6684	-21.2475	-17.3858	-16.7655	-13.9454	-16.0361	-19.5281	-21.0237	-20.231	-13.0661	-22.8392	-13.8492	-17.3692	-16.7802	-26.3162	-23.5321	-23.6608	-23.5796	-23.7173	-20.3213	-22.8475	-17.2395	-10.8907	-16.2137	-19.2888	-13.867	-25.1509	-15.5639	-14.0204	-16.9197	-17.9343	-24.4224
Methylobacterium extorquens PA1	-15.8579	-18.0991	-26.0329	-19.6319	-13.4279	-12.2231	-26.7323	-15.7782	-16.4281	-17.9964	-13.9647	-12.9457	-21.261	-17.0421	-21.6809	-20.8836	-21.1088	-21.258	-21.902	-17.695	-16.1567	-16.6813	-14.6624	-20.6328	-22.154	-23.377	-13.6874	-21.9619	-14.4643	-17.6686	-17.2188	-28.317	-22.5078	-23.4132	-24.6036	-23.8443	-19.6589	-22.3031	-16.3348	-11.2162	-16.7607	-22.1771	-16.4576	-23.5929	-16.6786	-13.6761	-15.8482	-20.0772	-26.5818
Methylobacterium radiotolerans JCM 2831	-13.9744	-16.3417	-19.6823	-18.2326	-14.639	-10.3194	-16.9297	-13.6301	-12.064	-15.6941	-11.9316	-11.5958	-15.8039	-15.9184	-18.2817	-15.7327	-19.4974	-17.0128	-16.5787	-15.9963	-17.3075	-16.2087	-17.3861	-23.3	-23.7826	-23.9817	-14.4413	-18.6419	-14.2415	-19.8429	-17.2785	-30.2359	-9.44264	-16.776	-21.4426	-14.4989	-16.9119	-22.3595	-16.0539	-9.49856	-16.4944	-18.2202	-16.1149	-20.6441	-12.3235	-13.4227	-17.9039	-18.709	-10.1685
Methylobacterium sp. 4-46	-4.19327	-17.5753	-18.8694	-15.403	-12.7785	-14.4334	-9.58701	-14.8205	-13.2337	-16.1762	-9.02795	-16.6816	-21.0664	-19.032	-19.3568	-20.8395	-20.55	-19.0902	-19.6612	-17.136	-15.433	-18.2761	-13.4716	-23.4728	-24.9545	-25.1524	-19.5361	-19.829	-18.3421	-16.1632	-18.394	-18.4499	-12.6473	-15.0249	-14.6355	-17.6766	-22.0467	-23.4838	-18.2341	-12.6323	-16.7762	-16.6502	-18.3911	-20.7577	-17.4874	-13.7618	-15.1265	-13.8846	-12.3374
Methylocella silvestris BL2	-20.0422	-21.999	-24.7794	-19.4255	-21.6858	-15.8008	-28.2008	-19.0674	-19.0111	-24.8957	-14.5972	-18.0968	-15.7053	-16.906	-22.8069	-19.6708	-19.5625	-23.9682	-22.8899	-22.7295	-24.4047	-17.925	-19.574	-25.0488	-26.6534	-23.9506	-16.6419	-20.597	-15.4411	-20.1766	-15.583	-31.6863	-20.7808	-22.2032	-22.001	-22.4994	-23.8358	-24.7646	-21.0968	-14.5747	-21.0042	-20.1251	-19.8084	-20.9743	-16.3104	-15.9913	-24.2164	-21.8579	-22.2955
Methylococcus capsulatus str. Bath	-20.2967	-27.3738	-25.2832	-21.3275	-21.7752	-10.4754	-32.036	-21.7748	-21.1591	-28.1645	-14.1381	-19.955	-24.2575	-22.2067	-16.4804	-21.4702	-15.9247	-22.7326	-21.1886	-22.4312	-21.4344	-16.8587	-20.8271	-31.4249	-29.1672	-28.7026	-25.0279	-28.7538	-15.9586	-31.0824	-18.8068	-23.5495	-25.5786	-26.4731	-23.0476	-25.8908	-20.0747	-27.1004	-20.386	-11.9441	-21.3964	-23.2306	-21.3283	-21.283	-15.9582	-15.6167	-12.8102	-11.7804	-23.7355
Microcystis aeruginosa NIES-843	-18.8667	-33.2273	-27.5925	-21.1496	-29.5724	-14.2633	-40.6064	-25.5369	-23.9811	-33.456	-10.8839	-16.5558	-27.6752	-25.8653	-21.2465	-26.6826	-21.4732	-28.9753	-26.5398	-29.9288	-34.2471	-21.1772	-25.3457	-39.2159	-40.6993	-36.899	-23.3968	-34.5519	-25.1945	-28.685	-23.223	-29.1328	-25.3429	-22.6544	-23.3484	-22.4127	-25.8466	-28.3005	-25.9654	-13.4327	-28.356	-34.0093	-31.9795	-23.5893	-23.2425	-21.2602	-23.7954	-17.6236	-22.0865
Moorella thermoacetica ATCC 39073	-9.64042	-5.43235	-9.98499	-7.86929	-6.60751	-8.23797	-19.3741	-11.8856	-12.6038	-18.2074	-5.57584	-7.56702	-8.56757	-11.1924	-2.76764	-6.39922	-8.90029	-1.1658	-4.90867	-10.008	-3.23098	-4.44819	-9.74683	-8.44641	-6.28436	-7.17432	-11.0441	-3.91609	-8.22795	-13.7757	-16.8317	-7.6699	-12.8121	-13.5003	-11.5658	-13.6068	-10.5574	-13.944	-10.7644	-8.46253	-10.73	-12.0063	-11.7089	-9.44346	-8.38418	-11.9512	-9.44052	-5.39393	-9.46204
Mycobacterium avium 104	-31.3853	-30.6613	-24.4345	-30.0304	-20.724	-18.4943	-53.2363	-30.2498	-27.8443	-51.1637	-20.2112	-27.0933	-24.9019	-20.2425	-20.8235	-28.0837	-19.1972	-24.4566	-23.065	-28.0241	-29.4467	-20.8049	-23.8392	-38.0612	-35.5694	-38.784	-19.8643	-31.3759	-18.6427	-43.4757	-15.4866	-28.7872	-34.9927	-38.0014	-35.0659	-36.2574	-23.9731	-29.56	-19.7595	-18.5323	-25.4475	-36.1634	-24.1234	-22.8592	-19.0997	-24.2828	-24.3495	-21.481	-33.9805
Mycobacterium bovis AF2122/97	-25.423	-30.4288	-23.0999	-28.7333	-18.9429	-13.9908	-44.1734	-29.4538	-28.3586	-42.7064	-19.7866	-25.2242	-25.1994	-23.0737	-24.9419	-23.8572	-21.6491	-27.1681	-24.0469	-26.0192	-29.6657	-19.0424	-24.7406	-41.4304	-36.0231	-39.3073	-22.7997	-24.9367	-18.5934	-36.8005	-16.8285	-28.0585	-38.1652	-38.6454	-35.3676	-36.8328	-23.0992	-30.9956	-18.3972	-17.7924	-28.5208	-30.7893	-25.3115	-21.2162	-20.6415	-22.3127	-19.57	-20.1662	-39.6225
Mycobacterium gilvum PYR-GCK	-18.0613	-18.3765	-23.9517	-17.5388	-20.1023	-10.8442	-38.2073	-23.8416	-21.366	-39.6666	-13.522	-18.2901	-21.7142	-16.5093	-22.0077	-22.3436	-22.3142	-20.6975	-20.2736	-26.4364	-26.8101	-14.9657	-23.064	-25.5929	-26.087	-29.2933	-16.0952	-27.9046	-16.8793	-29.4938	-12.8212	-23.3911	-28.6078	-27.7536	-26.6515	-26.7819	-17.3701	-24.8884	-13.3073	-13.9413	-22.3211	-24.4485	-18.9713	-13.1916	-14.6285	-18.1295	-21.0006	-19.9982	-34.4843
Mycobacterium leprae TN	-11.6248	-8.86	-0.418624	-10.541	3.95905	-6.47133	-8.70089	-0.374255	0.395767	-8.87685	-5.16866	-5.39965	-3.04974	2.1841	-2.10857	1.14793	-1.17305	-2.82382	0.472962	-2.61038	-2.68468	-2.73324	-2.04873	-6.83968	-6.80101	-6.99618	-0.684975	-3.48801	1.31077	-3.65003	6.84841	-3.94216	-12.9344	-16.1219	-13.5293	-11.5338	-2.37236	-0.74728	-5.65651	-9.15698	-4.83039	-7.08054	-5.55992	-2.70199	-1.84132	-15.1186	-5.7907	-7.69286	-12.4502
Mycobacterium smegmatis str. MC2 155	-14.2123	-15.5957	-12.886	-12.4179	-14.791	-9.44329	-26.6441	-14.8372	-13.2486	-25.2179	-12.0363	-15.6894	-14.0893	-14.0423	-18.3636	-17.8491	-21.5548	-16.097	-16.6687	-19.1483	-20.4441	-14.2822	-18.4792	-21.4879	-20.9697	-24.1675	-13.5446	-21.8456	-13.3512	-23.191	-12.4042	-12.4689	-23.6652	-18.0466	-19.6524	-21.6922	-12.0586	-20.4949	-9.24976	-11.6439	-12.8007	-13.6877	-8.41515	-16.7677	-8.50157	-10.7918	-9.14599	-7.89997	-21.3522
Mycobacterium sp. JLS	-17.2616	-16.5877	-18.1074	-22.6896	-16.216	-7.94823	-32.7996	-19.0149	-15.519	-34.1123	-11.6129	-17.3519	-15.9534	-17.5925	-19.0642	-22.4236	-20.3509	-20.7669	-23.3369	-23.5578	-24.9174	-12.0154	-22.1317	-26.7479	-29.2386	-33.443	-17.1664	-30.0626	-14.9531	-26.792	-10.9199	-19.5721	-25.7897	-28.9766	-26.8243	-27.9374	-14.4875	-22.9875	-12.4704	-13.0632	-16.5788	-19.8337	-13.2218	-12.2895	-10.7827	-12.3974	-18.1959	-17.1522	-26.6331
Mycobacterium sp. KMS	-19.5301	-16.871	-18.3192	-21.8927	-17.3712	-9.08792	-34.5986	-16.2465	-14.7237	-34.7094	-12.7338	-16.4386	-17.2736	-17.709	-19.1424	-22.5346	-19.4026	-20.8592	-22.4243	-23.7212	-25.0622	-12.0845	-21.2244	-28.9551	-29.442	-34.6441	-17.2652	-29.2769	-15.0561	-28.1896	-10.053	-21.8176	-27.0341	-29.2764	-28.0562	-28.1468	-13.6456	-22.1232	-12.6896	-13.227	-17.9237	-21.3532	-14.5576	-10.4213	-9.98784	-14.7699	-17.46	-18.3599	-27.8331
Mycobacterium sp. MCS	-18.1078	-16.4255	-16.9877	-21.5737	-17.1286	-8.86831	-32.3444	-15.8819	-14.4016	-32.77	-11.5431	-16.3043	-15.7697	-17.5283	-18.0207	-21.362	-19.3226	-20.7136	-22.2882	-23.4645	-24.835	-10.9771	-20.0796	-28.6289	-29.1222	-33.3281	-17.1116	-28.9412	-14.8962	-26.5632	-10.8441	-20.4329	-25.65	-27.8053	-26.6916	-26.818	-14.3973	-21.9113	-13.3451	-12.9696	-16.3809	-19.5377	-13.0295	-10.2143	-10.6643	-14.1909	-17.0458	-17.0339	-25.5188
Mycobacterium tuberculosis CDC1551	-26.3036	-32.41	-23.8202	-28.4333	-19.5094	-14.4329	-46.4753	-30.3237	-29.1373	-43.5988	-20.2197	-24.5005	-26.3267	-22.4412	-25.2312	-25.2576	-22.8313	-27.5986	-24.3829	-25.6593	-30.2388	-20.293	-25.1001	-43.2733	-38.839	-40.0967	-22.142	-27.6967	-19.9256	-37.2249	-18.3654	-28.8978	-39.0348	-40.658	-35.1976	-38.5834	-23.6872	-32.4994	-20.0943	-18.3009	-29.7057	-31.347	-25.4636	-21.7465	-22.3949	-23.0992	-21.3896	-21.8688	-40.3567
Mycobacterium ulcerans Agy99	-27.2165	-28.3137	-26.7501	-29.3647	-22.455	-15.389	-43.244	-26.2391	-24.0618	-45.4104	-20.1772	-25.4742	-28.2161	-20.4059	-22.2039	-25.2197	-20.8142	-28.5579	-26.3512	-29.5978	-28.1839	-19.2693	-24.066	-35.1923	-34.7606	-36.0207	-18.1095	-29.623	-15.8938	-37.0851	-16.3141	-28.816	-37.9499	-39.5584	-38.1165	-42.5103	-23.6303	-29.4513	-17.0251	-17.2502	-24.589	-30.1914	-19.3503	-19.6958	-18.3211	-21.0184	-25.3084	-24.7999	-37.2854
Mycobacterium vanbaalenii PYR-1	-14.5344	-17.8756	-20.3227	-17.8959	-16.3737	-8.09016	-31.6114	-18.2502	-16.727	-35.7189	-8.7357	-16.44	-19.2787	-18.7109	-18.1437	-22.5364	-22.4035	-21.8607	-21.4257	-21.7238	-24.0645	-15.0857	-21.2259	-25.9585	-26.4453	-28.6474	-16.2668	-24.2804	-16.0578	-26.196	-11.0551	-21.8216	-24.0381	-24.2812	-20.0599	-22.1502	-10.6482	-22.1254	-11.6931	-12.2296	-20.9292	-24.3616	-20.563	-11.4235	-10.9911	-12.776	-19.4642	-16.3633	-24.8363
Mycoplasma agalactiae PG2	-21.3384	-30.3423	-26.5629	-21.5369	-30.5965	-8.09104	-34.9257	-20.7596	-19.7814	-34.4201	-12.5511	-24.1562	-27.0566	-26.8912	-30.4635	-31.909	-30.1109	-33.9201	-31.7783	-28.2702	-33.2736	-27.992	-28.4252	-31.0639	-30.8302	-29.4098	-26.8607	-32.5017	-28.06	-35.2	-24.6015	-27.3665	-27.3327	-29.007	-28.057	-28.6503	-22.4202	-27.1505	-14.8244	-10.2017	-26.1975	-30.1797	-26.2089	-22.5889	-16.2529	-15.0757	-19.4389	-19.6643	-29.5743
Mycoplasma capricolum subsp. capricolum ATCC 27343	-18.662	-32.0988	-21.8049	-19.9079	-25.6118	-7.89138	-37.0108	-18.9107	-18.8426	-35.3663	-10.4233	-22.7124	-24.3976	-25.7081	-27.0607	-29.5434	-26.5402	-28.8028	-26.4757	-27.451	-29.3877	-27.4868	-24.161	-30.4957	-31.1772	-31.7961	-24.5979	-28.0225	-25.6819	-32.8761	-23.3591	-23.6692	-25.8601	-26.7559	-26.6324	-24.0845	-20.5978	-28.0898	-14.0851	-10.0488	-23.5814	-30.0035	-23.6335	-18.5295	-15.3612	-13.3435	-15.9042	-17.8732	-24.8991
Mycoplasma gallisepticum R	-21.0515	-29.9674	-27.3078	-22.246	-30.3946	-10.9145	-39.4683	-22.5212	-21.5632	-37.9982	-13.3628	-26.051	-26.7743	-28.7337	-31.3507	-33.7895	-30.0329	-33.7468	-32.6461	-31.0316	-34.0507	-28.8995	-29.2832	-35.7739	-33.5587	-34.129	-29.7195	-33.1894	-28.9409	-34.8461	-26.4517	-27.0975	-30.0122	-30.6328	-29.725	-30.3515	-24.1779	-30.9668	-18.5478	-11.0144	-26.904	-29.7809	-27.9071	-25.4013	-19.0181	-16.7773	-20.1196	-19.4085	-29.2997
Mycoplasma hyopneumoniae 232	-20.4454	-30.1834	-23.7865	-23.64	-28.99	-10.5375	-36.4945	-21.0314	-20.1169	-33.1067	-12.9661	-24.8465	-24.1888	-28.4239	-30.1311	-32.5574	-28.8844	-31.4021	-31.3886	-28.549	-32.6023	-27.7205	-27.0035	-30.1864	-29.0099	-30.5601	-28.4427	-28.5518	-27.7075	-33.1106	-23.1524	-26.5462	-26.3487	-26.8493	-27.0361	-27.7358	-22.6826	-28.6025	-16.9593	-10.6141	-24.2922	-29.9338	-26.2785	-25.0245	-18.529	-16.1132	-20.4436	-19.8763	-28.7355
Mycoplasma mobile 163K	-22.5102	-30.9967	-28.031	-23.7293	-32.4247	-11.9441	-36.9673	-22.3143	-21.469	-37.729	-13.3576	-26.5759	-27.3151	-29.0059	-30.8409	-33.2514	-29.6964	-30.9278	-31.0474	-31.8629	-32.9719	-28.4866	-30.6256	-35.3486	-34.2311	-33.7488	-29.0717	-33.6291	-27.3943	-34.0093	-25.7364	-27.7423	-29.3639	-28.6597	-30.0088	-29.83	-23.9644	-31.103	-18.0388	-11.9819	-27.3713	-30.6117	-28.3338	-26.4963	-17.7944	-15.9779	-20.3954	-19.0788	-28.9098
Mycoplasma mycoides subsp. mycoides SC str. PG1	-21.0244	-36.127	-26.5606	-24.6842	-28.8882	-10.3993	-42.7108	-21.2335	-20.911	-40.8159	-14.3163	-25.4409	-32.2149	-28.4748	-28.9838	-31.7022	-27.9043	-30.6533	-28.862	-31.1934	-33.987	-28.9915	-26.5407	-37.2115	-37.629	-35.3263	-29.0629	-33.8419	-26.6162	-37.8455	-27.6165	-28.5948	-32.3599	-32.7223	-33.2295	-31.3501	-24.0786	-31.2512	-18.0936	-11.6921	-27.4476	-34.8945	-28.6552	-22.4543	-18.2562	-14.7043	-21.6557	-21.1268	-29.8367
Mycoplasma penetrans HF-2	-25.5044	-36.8069	-29.1379	-27.2276	-34.4409	-10.6655	-42.4397	-23.7534	-22.4069	-42.5313	-15.6348	-25.8297	-30.7779	-30.9897	-32.3997	-35.1583	-31.2661	-37.1618	-34.3413	-35.7872	-37.573	-29.3558	-29.0022	-38.9252	-37.3161	-37.0161	-29.5429	-38.5466	-31.0245	-41.5393	-27.0445	-31.1884	-34.0007	-32.3929	-33.8751	-32.9708	-25.6192	-31.8069	-20.5231	-11.9721	-30.0085	-35.5359	-32.2345	-26.9585	-19.7037	-18.0237	-23.1715	-20.6149	-32.4251
Mycoplasma pneumoniae M129	-20.4117	-31.1402	-25.7582	-21.6066	-28.9684	-9.51641	-35.44	-18.0047	-17.0927	-36.0571	-11.944	-23.8358	-26.1566	-28.4076	-30.1196	-32.5453	-28.8768	-32.3838	-31.3751	-29.523	-31.5783	-27.7112	-26.9888	-33.1547	-31.9803	-34.5294	-27.4282	-31.5172	-26.6952	-36.0702	-23.1364	-26.5162	-27.3124	-27.806	-25.9983	-27.7022	-21.6558	-27.5832	-14.9264	-9.59161	-27.2586	-30.8865	-26.2439	-21.0043	-15.5021	-14.0748	-19.4059	-17.8471	-26.7048
Mycoplasma pulmonis UAB CTIP	-23.0817	-32.3234	-27.2475	-25.3012	-30.1498	-11.5432	-40.1011	-23.3959	-22.3665	-38.5128	-14.0403	-26.4539	-26.8019	-29.3315	-31.7832	-33.2481	-30.3375	-33.399	-33.1519	-30.9173	-34.882	-30.2559	-28.822	-33.8492	-31.5678	-33.1702	-28.2572	-33.3398	-29.3944	-35.1326	-25.0135	-30.0858	-30.1809	-30.9846	-30.9331	-30.4447	-24.0696	-29.6592	-19.5353	-11.6806	-26.9687	-32.2068	-28.0025	-26.1021	-18.8704	-16.8076	-22.2631	-21.3375	-29.3068
Mycoplasma synoviae 53	-16.9185	-29.5111	-24.3532	-22.1229	-27.6626	-8.20505	-33.6381	-20.6214	-19.7456	-33.3309	-11.6226	-23.6874	-25.6919	-29.1795	-29.9604	-32.3774	-28.7726	-32.1262	-31.1881	-29.1534	-32.2378	-27.5826	-25.7826	-31.7038	-32.5607	-30.0927	-27.2254	-33.0224	-27.5241	-33.4848	-23.9111	-26.086	-25.7877	-27.1759	-27.4516	-27.2185	-21.2708	-29.3117	-15.4426	-10.2602	-25.7698	-29.1913	-26.7423	-23.7188	-17.112	-13.4922	-18.8537	-19.4233	-27.2632
Myxococcus xanthus DK 1622	-23.6484	-36.068	-25.284	-23.7672	-29.093	-8.6697	-48.9474	-16.2238	-14.5963	-46.167	-11.2262	-25.8853	-26.6184	-30.2989	-31.5331	-31.0899	-29.6771	-32.2593	-28.8536	-29.4415	-24.7104	-29.4357	-26.6679	-31.845	-34.3282	-35.524	-29.7576	-33.2416	-26.5787	-40.8284	-22.6495	-23.9201	-25.085	-24.5514	-28.0463	-32.0607	-23.3401	-27.7673	-17.6101	-8.90908	-26.3656	-34.5482	-29.9719	-19.0081	-15.8259	-19.5037	-16.5998	-16.2614	-32.7017
Neisseria gonorrhoeae FA 1090	-20.1962	-14.6775	-17.4642	-21.1103	-15.4993	-14.1534	-17.4037	-13.0413	-13.0636	-16.5951	-11.8266	-17.4514	-18.0698	-8.14384	-12.0174	-11.0354	-14.6231	-10.7332	-11.0515	-13.8436	-11.1353	-10.1233	-13.7776	-19.8995	-18.8029	-17.3032	-8.9789	-20.3028	-7.78341	-17.1005	-12.2831	-17.495	-17.0072	-16.7916	-17.1756	-16.2831	-15.1661	-19.3479	-18.7177	-13.1017	-16.4602	-19.5846	-18.3865	-16.0365	-13.7639	-15.7178	-12.2672	-10.8382	-14.1373
Neisseria meningitidis 053442	-19.4938	-16.0928	-16.8815	-19.4351	-15.9609	-13.2963	-16.9289	-13.4598	-13.4714	-14.1138	-12.0044	-16.8389	-14.5092	-8.57594	-12.4375	-9.58812	-14.0413	-12.1683	-10.5299	-15.3007	-11.5954	-10.5242	-12.1985	-18.4692	-17.3708	-13.8417	-10.4122	-20.7794	-10.18	-12.6384	-9.70832	-19.9379	-17.4301	-17.2029	-16.5797	-16.6884	-14.5315	-16.8446	-14.9525	-12.2561	-15.8858	-18.0082	-16.8172	-11.4595	-12.074	-14.861	-12.5559	-11.1506	-15.5422
Neorickettsia sennetsu str. Miyayama	-24.153	-32.5038	-26.4063	-25.5951	-25.8847	-12.3446	-38.8581	-21.2868	-20.0654	-40.0392	-13.0739	-22.0954	-30.0794	-24.6562	-23.5436	-25.1353	-25.6954	-23.8284	-25.198	-26.0088	-24.8481	-23.7436	-24.9104	-30.5831	-30.1094	-29.7843	-24.3788	-32.2082	-21.1873	-36.2075	-23.078	-28.3727	-27.9237	-30.1314	-28.7632	-28.002	-23.0548	-25.2676	-17.3985	-13.5818	-27.3071	-31.3838	-28.4448	-23.6215	-19.5448	-20.3784	-18.6315	-18.2584	-26.6221
Nitratiruptor sp. SB155-2	-13.3938	-9.72448	-6.45307	-13.0012	-2.01289	-11.8021	-16.5648	-11.0821	-9.19289	-12.7838	-11.1317	-2.57824	-12.9462	-7.83594	-2.82853	-2.58613	0.650027	-8.47514	-5.28835	-7.42337	-5.66234	-3.11629	-1.62024	-9.41831	-8.33856	-7.11233	-3.66455	-5.69263	-2.85539	-14.06	-3.19681	-4.26413	-8.96794	-8.88401	-9.3075	-5.38926	-9.63722	-8.48273	-10.4955	-12.6469	-11.4754	-15.6401	-11.3431	-8.9385	-11.8333	-14.3825	-7.52978	-8.86117	-7.25311
Nitrobacter hamburgensis X14	-27.693	-28.8381	-31.13	-26.7377	-23.7481	-20.6296	-37.5175	-24.6976	-23.4703	-29.4431	-16.4087	-23.6159	-32.8178	-22.596	-23.35	-26.4225	-22.905	-27.7752	-23.5206	-28.9293	-25.4792	-24.3956	-22.2486	-34.6287	-33.1827	-31.4302	-27.2844	-31.0218	-25.0649	-28.8457	-21.5898	-37.2599	-27.4109	-31.1012	-31.5565	-29.9064	-29.938	-37.7097	-30.4036	-19.5279	-27.2248	-31.0457	-32.9678	-33.9686	-24.7221	-18.469	-25.7531	-26.1749	-21.6717
Nitrobacter winogradskyi Nb-255	-22.4808	-25.8216	-28.4935	-23.3945	-20.8783	-17.0496	-27.6757	-20.1721	-20.4552	-26.531	-13.7673	-20.5992	-27.9101	-21.9992	-22.1853	-25.4383	-21.4473	-25.6726	-22.0055	-26.6232	-22.552	-22.4925	-21.6381	-31.9763	-29.6871	-30.1504	-24.8047	-23.0693	-23.6917	-27.1482	-17.875	-33.9171	-29.9456	-28.9394	-30.3478	-26.1182	-28.0958	-33.1596	-26.3081	-15.5883	-22.0694	-25.1417	-25.9769	-28.3232	-20.0788	-17.375	-22.9121	-23.8376	-19.9553
Nitrosococcus oceani ATCC 19707	-18.7507	-24.9323	-19.7542	-19.74	-19.2084	-5.69524	-24.0381	-12.3161	-11.6623	-24.0674	-13.3805	-16.2116	-20.8941	-18.5208	-18.7614	-16.856	-15.1354	-21.1036	-18.514	-22.8975	-22.873	-16.112	-21.1486	-22.0311	-22.7616	-23.2684	-18.3364	-27.2666	-18.2494	-26.8775	-12.2263	-20.0804	-24.1079	-25.0381	-21.551	-23.3673	-19.4726	-23.5185	-17.7394	-9.19031	-18.0394	-23.9594	-20.9626	-20.6912	-18.3903	-18.9025	-16.2331	-12.1888	-22.2095
Nitrosomonas europaea ATCC 19718	-20.6173	-25.402	-23.9567	-22.8462	-19.5787	-11.2269	-27.3287	-12.8551	-12.5747	-22.1643	-12.5628	-18.5466	-23.5339	-20.1687	-10.7453	-15.3689	-8.88095	-18.1398	-16.883	-24.9784	-24.2021	-14.4274	-22.723	-27.4086	-26.2469	-29.1389	-20.0204	-30.8847	-14.206	-26.7341	-13.8042	-21.639	-19.7821	-21.4699	-18.5373	-20.5789	-18.5331	-22.9145	-15.7465	-10.4504	-18.6968	-21.9715	-20.6757	-21.4166	-15.361	-16.9389	-19.4187	-15.3714	-22.4342
Nitrosomonas eutropha C91	-21.6185	-23.7107	-21.1654	-21.8384	-21.8005	-11.7062	-28.3201	-13.1679	-12.8245	-24.0456	-12.125	-21.3987	-20.9924	-21.1601	-14.6783	-16.638	-11.6782	-20.2389	-17.9555	-25.2402	-23.428	-13.2936	-20.7244	-28.0213	-27.843	-28.6502	-20.0092	-29.2269	-12.1281	-26.5381	-14.9739	-15.9662	-18.0711	-20.7802	-22.7628	-20.7737	-18.5696	-24.1584	-18.5256	-10.9784	-18.1377	-22.4897	-19.113	-21.5556	-16.3638	-17.4789	-18.364	-13.3433	-22.6286
Nitrosospira multiformis ATCC 25196	-24.0687	-27.8438	-27.9674	-25.1911	-21.5399	-13.8827	-22.3838	-15.2787	-15.761	-25.7499	-14.4756	-21.1984	-24.5194	-23.2908	-20.6511	-22.3332	-17.2858	-25.6626	-21.2296	-30.1126	-24.1859	-16.1063	-22.891	-27.7165	-29.4884	-32.107	-21.1248	-32.3154	-14.109	-27.916	-17.612	-24.0737	-25.116	-25.9287	-25.6571	-24.5661	-20.9594	-21.8947	-16.4308	-11.2825	-23.6493	-26.283	-22.6011	-18.1209	-12.7759	-20.871	-21.6639	-17.6576	-23.4162
Nocardia farcinica IFM 10152	-20.4877	-24.8263	-22.2855	-20.8605	-20.3464	-15.0659	-34.4722	-17.21	-16.6914	-35.6153	-13.7148	-19.4246	-19.2231	-14.6902	-20.1298	-21.5168	-22.3942	-21.8447	-20.4103	-18.6953	-28.0392	-16.0734	-23.2096	-28.9225	-25.4099	-24.6123	-15.2493	-26.2429	-19.0395	-24.1271	-17.0319	-19.7786	-33.9955	-32.229	-30.0196	-30.1137	-22.6206	-27.1016	-16.655	-14.2011	-22.8693	-24.2711	-22.5047	-24.4005	-19.9556	-20.7101	-20.4182	-17.327	-33.8015
Nocardioides sp. JS614	-6.01194	-12.2638	-12.1503	-12.7486	-20.5148	-8.30218	-11.1684	-3.91702	-3.55066	-23.3367	-7.03704	-17.9886	-17.4489	-17.1004	-18.7227	-22.9422	-22.1346	-21.3171	-22.95	-19.792	-24.2423	-18.7175	-20.7144	-31.7594	-32.2767	-29.4971	-17.7391	-23.0833	-14.5162	-21.9055	-13.2979	-14.4546	-14.6501	-15.5853	-14.7393	-15.9655	-14.7513	-20.3786	-10.4587	-6.30822	-14.9619	-17.4637	-11.6526	-13.6716	-11.8024	-4.84889	-14.9941	-13.1953	-17.699
Nostoc sp. PCC 7120	-19.6911	-31.0412	-30.4487	-28.0152	-29.4663	-15.1718	-37.0801	-25.3853	-22.8466	-33.067	-15.8058	-19.4933	-31.4656	-24.7821	-20.1912	-28.604	-22.4355	-28.9146	-29.4786	-29.82	-29.15	-21.1279	-25.2815	-39.0796	-37.5646	-36.7655	-22.3269	-37.4074	-19.1208	-33.427	-20.1337	-32.9672	-24.1814	-29.4568	-26.1957	-19.2734	-23.7413	-27.2068	-23.8214	-16.3254	-31.1305	-36.6665	-33.7593	-21.5012	-23.11	-19.0012	-26.6198	-22.4855	-23.9539
Novosphingobium aromaticivorans DSM 12444	-27.4837	-38.4971	-20.1505	-25.7821	-23.9833	-11.0212	-45.3298	-22.5149	-21.4135	-41.8361	-15.8167	-19.244	-17.2779	-28.1	-23.9629	-24.8862	-21.6624	-31.1992	-28.0712	-26.0647	-31.7066	-20.0606	-20.7665	-26.4903	-26.0812	-25.3634	-26.8244	-34.9903	-24.6172	-37.8996	-19.8669	-24.1173	-30.226	-33.7157	-31.4257	-31.8855	-25.1407	-27.0317	-20.4451	-13.8273	-17.603	-20.8958	-19.3915	-23.254	-18.694	-19.3649	-18.6265	-23.2152	-34.6742
Oceanobacillus iheyensis HTE831	-1.65107	-13.4004	-5.55906	-8.27417	-14.678	0.888347	-17.755	-12.6046	-10.6865	-21.9731	-3.89434	-12.5828	-12.8675	-9.23904	-17.2553	-13.9103	-16.1984	-11.1647	-15.2484	-9.60197	-17.3803	-14.4423	-15.9028	-14.5661	-17.2136	-9.56628	-14.0065	-17.2954	-13.8324	-16.8603	-13.615	-12.2765	-7.33393	-9.56492	-8.62165	-7.23524	-7.82526	-11.8463	-3.00373	-2.78875	-12.0971	-5.74148	-9.94685	-6.02347	-4.07552	-7.89578	-6.92617	-7.70753	-11.051
Ochrobactrum anthropi ATCC 49188	-6.79822	-17.0352	-13.9873	-4.58663	-17.3941	-6.19253	-5.56394	-8.7242	-7.38036	-12.8647	-3.93657	-12.929	-9.188	-20.0195	-16.6646	-20.8608	-20.0987	-19.2348	-18.8833	-18.6571	-16.1233	-19.6672	-12.642	-18.5833	-14.1062	-14.3302	-17.6673	-14.9147	-20.4442	-18.5765	-16.1879	-12.2636	-7.45257	-8.34639	-8.55085	-7.79714	-17.6229	-21.2738	-12.2869	-3.18058	-13.6827	-16.0663	-12.3819	-17.5623	-10.6304	-3.61002	-9.7917	-11.0314	-12.5363
Oenococcus oeni PSU-1	-19.4244	-29.4664	-21.0892	-16.622	-26.0707	-12.3565	-34.6205	-22.89	-21.0776	-32.8217	-13.2977	-24.152	-20.6279	-27.9059	-33.0627	-33.5283	-33.3276	-33.7398	-31.8786	-30.5798	-31.7236	-27.5531	-28.9421	-33.4654	-32.4075	-33.4534	-28.7488	-28.6202	-27.4256	-32.7922	-24.7962	-19.7095	-27.6035	-26.6867	-26.1087	-26.1443	-22.7623	-32.0729	-11.1147	-10.1	-19.3138	-22.5363	-21.1004	-23.4469	-17.7217	-10.9766	-15.5913	-13.6535	-27.0342
Oligotropha carboxidovorans OM5	-19.6568	-26.5605	-28.4492	-26.1107	-20.4174	-17.6091	-28.2297	-24.6701	-22.6527	-28.0799	-14.4041	-18.9624	-26.2011	-23.7301	-21.6635	-30.473	-18.4695	-23.7572	-21.7232	-23.428	-24.1322	-21.8	-18.3982	-35.652	-34.2685	-39.5799	-22.4753	-23.2459	-21.281	-26.5405	-18.3262	-30.3037	-25.3867	-24.7529	-26.6251	-23.1565	-28.5635	-32.5221	-23.7933	-16.3554	-19.4788	-26.458	-23.2963	-25.7215	-17.9721	-15.6761	-23.8587	-22.543	-18.9586
Onion yellows phytoplasma OY-M	-18.5576	-29.6302	-27.7613	-20.7607	-30.7551	-10.2251	-35.2736	-18.9444	-17.951	-35.7423	-11.6952	-27.2401	-28.2743	-26.0161	-31.5537	-32.0045	-30.174	-32.0568	-31.8838	-31.4566	-33.4484	-29.0662	-29.5379	-34.2904	-35.0426	-31.6291	-26.973	-32.7444	-29.1547	-35.4726	-27.7194	-28.5752	-24.5802	-25.294	-24.313	-24.8815	-21.6084	-29.2955	-16.0349	-10.3438	-28.4233	-32.4834	-28.4411	-24.7362	-18.4336	-12.2974	-22.6823	-20.8612	-24.7872
Opitutus terrae PB90-1	-21.4004	-24.6073	-24.6819	-20.2834	-20.1663	-7.98912	-27.4522	-21.3605	-19.0587	-23.9892	-13.7481	-20.8179	-26.6989	-21.8688	-24.5545	-23.707	-24.031	-28.0762	-26.7568	-20.4013	-29.8975	-25.5721	-17.5046	-26.2486	-29.7822	-27.0138	-21.5323	-26.5979	-19.3096	-21.9591	-19.9787	-32.9058	-26.0818	-28.9003	-25.197	-26.4807	-15.3807	-25.0756	-13.9681	-14.9442	-26.1607	-29.3325	-23.8758	-20.3544	-14.3071	-20.1822	-17.4165	-17.725	-27.2298
Orientia tsutsugamushi Boryong	-29.9	-38.6791	-31.4716	-31.1375	-34.769	-17.5052	-47.59	-31.6466	-31.1519	-45.6389	-17.8812	-32.0922	-37.9233	-34.1707	-30.8854	-34.0392	-30.4688	-33.199	-33.3425	-35.3356	-33.1131	-27.4632	-32.755	-43.3887	-43.6122	-38.2903	-32.4817	-37.8179	-29.3926	-43.6303	-31.4485	-35.6313	-35.6854	-36.1891	-34.5616	-34.5378	-31.6546	-37.2582	-23.5085	-17.9076	-36.1018	-39.0571	-35.4622	-31.8924	-25.9558	-22.1056	-29.7837	-27.1498	-31.7889
Parabacteroides distasonis ATCC 8503	-28.1647	-39.1376	-23.8831	-26.5249	-30.7694	-16.8619	-49.5123	-29.1924	-28.1237	-53.1561	-18.6583	-26.1384	-33.8647	-23.9606	-29.851	-23.7317	-30.5909	-28.0334	-23.9412	-26.8236	-25.4896	-20.9634	-28.6284	-37.1727	-29.7735	-34.0664	-25.6934	-37.707	-24.4907	-44.3779	-24.6629	-26.8067	-36.9051	-32.3458	-40.1195	-35.6073	-23.9212	-26.8398	-23.1934	-19.6446	-28.1707	-35.3382	-31.9706	-25.053	-20.4173	-22.0936	-18.3302	-19.9575	-34.4014
Paracoccus denitrificans PD1222	-5.31281	-11.5843	-13.3793	-6.97579	-21.6835	-5.45698	-1.02782	-11.1856	-10.7877	-9.00295	-7.17753	-14.0728	-15.8142	-17.2148	-16.8039	-19.0562	-17.1851	-17.4299	-17.0427	-14.9793	-12.4073	-15.7879	-16.8151	-15.0032	-17.5131	-13.7288	-15.84	-19.3192	-19.618	-12.3655	-13.4503	-23.7227	-14.9264	-23.9208	-14.0027	-10.2009	-16.9303	-17.5249	-12.701	-9.48868	-14.3534	-14.0271	-14.0322	-20.823	-14.0423	-12.1968	-19.2804	-17.4256	-14.9261
Parvibaculum lavamentivorans DS-1	-17.2872	-22.1368	-23.127	-20.8059	-27.1524	-8.42583	-34.3106	-17.2833	-16.3028	-25.302	-12.2177	-19.8279	-22.714	-21.5552	-22.5194	-20.2743	-20.3749	-21.5466	-21.5556	-26.1311	-22.8628	-17.6741	-19.2224	-25.2614	-24.8894	-24.2152	-23.309	-22.9025	-21.1215	-22.9264	-19.0717	-28.9311	-24.0039	-25.3185	-23.2601	-20.8224	-13.2969	-22.2811	-13.5028	-10.1463	-17.9729	-21.8233	-19.8026	-17.4715	-11.6449	-14.3827	-20.516	-18.2383	-21.6298
Pasteurella multocida subsp. multocida str. Pm70	-14.4115	-11.9781	-13.7664	-10.3455	-9.83359	-10.2568	-14.7835	-8.34419	-7.35878	-16.9703	-4.95534	-10.7323	-13.3877	-9.45702	-15.3219	-14.4359	-13.9264	-12.0484	-11.3982	-9.17457	-14.4685	-14.4139	-14.0826	-10.312	-8.21408	-9.6931	-8.29296	-13.6479	-13.0708	-18.4897	-6.59098	-8.81562	-11.3133	-11.0893	-10.4681	-10.5765	-14.4307	-14.7077	-12.8876	-10.2134	-15.7681	-14.891	-13.6981	-13.3428	-9.98832	-7.82133	-7.47614	-9.06431	-12.4305
Pediococcus pentosaceus ATCC 25745	-28.7086	-39.3154	-31.9863	-27.0927	-36.2232	-11.9838	-49.738	-30.6991	-30.855	-49.9514	-16.0954	-33.0941	-35.487	-35.0729	-40.1512	-43.164	-39.5433	-39.8064	-42.2485	-37.688	-34.8768	-36.5518	-34.9885	-43.0502	-41.9817	-40.9132	-38.9059	-38.8324	-34.3634	-51.059	-32.6997	-31.684	-40.499	-41.508	-39.935	-39.992	-35.4514	-45.433	-23.148	-9.7701	-32.1047	-39.3025	-34.9285	-35.4007	-24.0669	-12.585	-21.867	-21.046	-38.8682
Pelobacter carbinolicus DSM 2380	-25.8781	-23.4935	-18.8462	-25.6163	-18.0695	-14.7318	-36.9074	-21.7584	-20.9142	-30.375	-13.497	-16.2598	-24.8259	-13.8272	-14.9053	-15.4285	-11.9589	-17.6671	-14.8415	-17.928	-17.7617	-13.1335	-9.48403	-21.682	-23.3528	-20.7416	-16.6097	-24.5301	-14.4546	-32.5506	-17.0277	-26.4585	-22.5012	-25.6393	-22.8285	-22.5013	-23.2306	-25.2823	-25.3987	-15.3579	-27.0254	-28.4439	-24.8976	-21.4485	-19.3735	-19.3315	-22.2094	-20.0519	-21.3259
Pelobacter propionicus DSM 2379	-22.9877	-23.9371	-28.7331	-24.3811	-20.6483	-12.7736	-41.0627	-20.0116	-18.9608	-40.78	-17.5699	-19.0781	-29.6342	-19.8815	-17.787	-21.6434	-17.5497	-21.9389	-19.8668	-20.6873	-22.3667	-14.9077	-18.5496	-22.9933	-20.5996	-24.8988	-18.6187	-29.5477	-17.4188	-33.0869	-21.5472	-27.6326	-26.7254	-30.1397	-25.9481	-27.4513	-17.7977	-22.7308	-17.0538	-17.5436	-29.93	-32.0304	-29.7362	-17.939	-15.2627	-22.9461	-22.1658	-21.8136	-27.2482
Pelodictyon luteolum DSM 273	-13.5042	-17.4959	-16.2839	-15.5298	-5.5027	-9.78103	-18.7297	-10.8763	-9.84957	-23.8872	-11.605	-11.1154	-9.00244	-13.0027	-12.8231	-7.41892	-10.4046	-10.6167	-12.1088	-14.8318	-12.1323	-10.8443	-8.59356	-9.3821	-12.2767	-12.648	-13.8433	-16.377	-7.49251	-15.4677	-12.1352	-15.4309	-19.856	-21.5935	-18.9412	-20.0514	-9.75668	-13.4974	-10.7482	-11.7808	-8.33392	-13.4539	-10.2808	-6.87447	-11.1249	-19.3502	-14.5335	-11.2054	-19.9045
Pelodictyon phaeoclathratiforme BU-1	-19.1847	-22.7253	-25.9829	-20.3551	-14.5933	-13.4574	-33.5237	-22.1745	-20.723	-31.0356	-15.9926	-14.5948	-21.2549	-22.5696	-16.9893	-23.4273	-16.7594	-17.8322	-18.4656	-24.1126	-23.2313	-17.5015	-17.1556	-24.4261	-23.2174	-24.9008	-21.4106	-22.2341	-16.4389	-30.3437	-21.6983	-25.9766	-23.0362	-24.8026	-23.6307	-23.5809	-18.1219	-20.9582	-16.7435	-16.8097	-22.3856	-23.9008	-22.3483	-20.2326	-17.9132	-20.3556	-18.8362	-18.8336	-23.4336
Pelotomaculum thermopropionicum SI	-15.0178	-7.02882	-14.9897	-14.072	-12.5028	-7.34055	-22.4263	-17.4391	-16.8462	-22.6126	-9.98853	-7.79131	-14.8648	-15.0073	-8.30103	-15.2241	-11.7886	-14.4981	-16.981	-13.139	-12.1588	-11.6965	-8.62312	-15.0457	-16.7949	-16.3485	-12.8317	-11.4337	-10.7737	-23.5923	-15.5432	-18.2193	-18.2504	-16.1244	-18.7355	-16.5945	-11.8264	-16.8362	-12.169	-14.7933	-18.0006	-18.7853	-18.9375	-13.0265	-9.69141	-9.44401	-13.5502	-7.52765	-15.4407
Petrotoga mobilis SJ95	12.6013	1.84984	8.09342	13.874	-5.64763	10.7122	0.721223	3.49596	2.41468	-6.49391	5.25639	2.99013	8.57914	-3.42686	-6.37465	-4.58419	-5.94687	-7.03223	-6.04521	2.97001	-3.29278	-6.59682	-6.14756	-3.40479	-4.31904	0.00418145	-4.25634	0.630882	-7.30027	0.13885	-3.67579	8.20816	10.5729	12.7081	8.29338	6.19973	14.0804	9.73769	13.7052	5.83123	7.10122	9.95432	4.21032	12.5709	9.11434	7.14085	5.48477	7.06471	7.34067
Photobacterium profundum SS9	-21.9414	-27.2499	-23.8593	-20.4486	-27.0348	-11.782	-39.8543	-22.7374	-22.2742	-39.3996	-12.4673	-24.2541	-29.5707	-24.4605	-26.9745	-22.2966	-22.2928	-20.6556	-22.2361	-18.3636	-22.7459	-17.9366	-19.0239	-27.4996	-26.996	-24.2036	-18.0534	-23.8105	-22.8361	-44.3145	-22.7622	-27.2834	-30.4989	-25.6201	-29.548	-30.689	-17.2998	-22.8297	-12.2098	-13.8685	-29.1665	-37.2188	-33.8212	-19.133	-18.5356	-14.973	-21.8842	-20.9062	-35.3952
Photorhabdus luminescens subsp. laumondii TTO1	-17.5569	-24.7759	-23.8023	-12.403	-18.2564	-8.06902	-33.8874	-23.5043	-23.186	-38.3331	-9.82247	-18.8617	-17.8918	-20.9282	-22.5982	-19.7679	-21.0578	-21.1395	-23.807	-17.5027	-21.9871	-22.6098	-22.5591	-20.3814	-23.9107	-26.1392	-24.5857	-24.723	-23.3627	-31.2027	-17.0617	-23.0469	-28.2281	-27.076	-26.3367	-29.6057	-23.4765	-24.1541	-16.0934	-8.03702	-24.3664	-24.6203	-26.0752	-22.4369	-15.4348	-11.348	-16.5638	-12.8458	-26.3509
Polaromonas naphthalenivorans CJ2	-11.0493	-19.3037	-25.1788	-18.7769	-20.5359	-11.3214	-16.2746	-17.9506	-17.5803	-18.4194	-11.0546	-18.999	-20.4945	-18.1145	-20.7328	-21.9564	-20.1409	-21.3313	-19.9615	-22.8154	-21.2629	-17.7262	-16.727	-28.7899	-32.3063	-26.526	-18.7517	-27.1127	-16.5289	-14.9628	-19.317	-25.488	-18.6845	-18.627	-17.7721	-15.9949	-25.7736	-28.3968	-19.4887	-10.3306	-19.0106	-26.5335	-23.6998	-21.6905	-12.8323	-9.89136	-15.0296	-16.224	-17.7273
Polaromonas sp. JS666	-14.8918	-17.1975	-18.8212	-18.4113	-19.007	-7.75626	-15.7088	-11.6943	-11.2362	-17.2893	-5.44464	-16.2394	-18.5113	-15.4406	-19.9608	-23.2774	-19.284	-15.6382	-18.2207	-16.3335	-22.7194	-18.9246	-15.0073	-26.461	-28.9583	-30.1665	-16.0363	-23.7717	-17.8185	-10.2403	-14.7378	-19.239	-17.4539	-12.565	-13.5052	-8.65058	-15.2708	-19.8055	-12.1696	-7.83839	-19.1026	-19.1241	-13.7592	-18.1088	-11.4971	-5.9092	-13.8363	-11.8683	-8.35836
Polynucleobacter sp. QLW-P1DMWA-1	-11.4101	-12.3656	-16.1542	-17.4283	-14.3607	-14.7359	-8.56068	-16.7446	-15.7216	-2.72114	-9.54925	-12.9991	-12.8632	-11.8724	-8.69674	-10.2514	-10.2813	-11.4837	-13.9647	-17.6905	-14.9908	-10.724	-10.4659	-20.2053	-22.1006	-18.4811	-11.7127	-13.2295	-10.3725	-1.29711	-9.00344	-12.2925	-11.7238	-12.4643	-11.815	-11.9252	-18.6435	-22.3456	-22.6742	-13.7319	-12.1988	-11.3186	-15.1444	-20.7441	-14.0271	-13.3044	-12.4426	-7.10754	-8.77839
Porphyromonas gingivalis W83	-29.5951	-51.4279	-42.1889	-37.3446	-44.9642	-19.3826	-54.6165	-30.7819	-29.8571	-59.8302	-21.8627	-41.2846	-41.7098	-48.7322	-44.6716	-50.9698	-43.2512	-46.333	-44.3828	-47.3415	-48.6084	-40.8811	-45.4418	-57.7907	-55.7038	-56.3615	-45.5621	-52.694	-42.5784	-55.2142	-39.9635	-38.0893	-44.7111	-43.5663	-42.9787	-45.0743	-37.1682	-45.6061	-24.4507	-21.2708	-40.1778	-45.3216	-43.073	-35.718	-27.0913	-29.9526	-23.7074	-25.1445	-43.9326
Prochlorococcus marinus str. MIT 9313	-13.2149	-14.2006	-15.9184	-10.3975	-15.4185	-9.07828	-15.7087	-12.6246	-14.4769	-15.7394	-4.19053	-15.2174	-15.0064	-14.4988	-15.2001	-9.92858	-13.6065	-12.2556	-12.9655	-10.7575	-15.0398	-16.0427	-17.0482	-13.3191	-16.1892	-16.2987	-14.3493	-20.4859	-14.7255	-12.3848	-13.8023	-15.3336	-15.5939	-16.2751	-18.504	-14.5952	-18.914	-19.6415	-15.8728	-9.19173	-13.2341	-16.3937	-15.208	-13.4842	-13.9212	-17.6935	-12.1358	-15.9832	-16.4492
Propionibacterium acnes KPA171202	-21.5893	-20.7048	-17.4039	-16.7851	-24.9312	-4.25723	-25.4149	-10.1345	-9.96779	-30.4209	-9.40644	-23.6067	-19.5579	-25.9418	-31.625	-25.5006	-27.9954	-26.7271	-27.4518	-23.2763	-25.5521	-24.4427	-25.4898	-23.9754	-23.8412	-25.9158	-25.793	-29.0313	-24.1366	-27.0637	-19.2869	-15.859	-24.099	-19.7774	-23.9848	-26.0704	-19.3338	-24.1774	-15.1652	-3.38722	-15.7736	-15.9455	-13.7496	-19.9587	-8.30408	-10.8836	-9.49291	-12.3602	-25.9247
Pseudoalteromonas atlantica T6c	-25.569	-35.7022	-23.0319	-23.6411	-25.6729	-10.5669	-39.184	-21.5793	-20.3651	-43.1739	-13.3487	-23.5795	-28.662	-24.5471	-23.3128	-23.3707	-21.8819	-22.7199	-21.4774	-25.8442	-31.4035	-22.3634	-21.202	-30.5167	-31.0744	-27.325	-19.2396	-33.919	-24.021	-42.6487	-19.5192	-26.1452	-36.2917	-31.9604	-35.4428	-32.8042	-20.8588	-23.6435	-18.3051	-9.45547	-32.0599	-32.8226	-34.8077	-22.8987	-18.6183	-21.3497	-20.6373	-17.0778	-38.572
Pseudoalteromonas haloplanktis TAC125	-29.5767	-32.3138	-21.4916	-20.2115	-19.621	-9.07504	-34.5754	-16.5242	-14.6134	-30.8187	-9.85634	-21.5529	-25.7679	-21.2008	-23.2231	-20.8659	-19.1767	-22.1185	-20.2109	-20.5386	-27.3224	-20.414	-17.864	-29.4829	-27.1327	-29.4887	-18.9698	-34.2231	-17.7974	-27.735	-16.5601	-25.1989	-30.2547	-27.4764	-29.5462	-28.1656	-14.7691	-17.7938	-10.9455	-9.74715	-25.9944	-32.6159	-29.8464	-16.9696	-13.0085	-20.8403	-17.8573	-14.645	-32.9823
Pseudomonas aeruginosa PA7	-14.8424	-18.2015	-11.5724	-12.1309	-12.5576	-5.25064	-23.5336	-15.516	-15.9625	-18.4023	-6.87313	-12.5469	-18.6462	-16.8536	-15.2387	-11.6715	-16.4678	-16.9669	-16.5312	-14.9137	-16.2336	-16.1702	-17.3367	-14.197	-15.6806	-13.8805	-18.387	-13.5318	-17.1841	-21.6494	-16.2105	-16.1097	-16.3206	-13.627	-14.3273	-12.3933	-12.832	-17.2874	-10.9455	-7.41789	-22.3249	-16.9619	-16.9491	-12.5771	-9.22429	-7.22396	-11.771	-10.6044	-15.0681
Pseudomonas entomophila L48	-15.4085	-14.6859	-21.4521	-13.0479	-10.737	-8.50631	-18.3031	-9.27037	-8.8624	-15.2152	-8.22196	-14.0998	-18.9299	-13.2514	-17.8297	-12.0925	-14.2011	-13.4651	-15.0721	-9.03836	-10.4593	-14.8103	-13.8469	-18.0798	-16.5874	-15.8017	-12.8721	-14.394	-15.6506	-24.5109	-12.4982	-10.8079	-14.0139	-13.0273	-13.0861	-13.2755	-10.9868	-12.5712	-8.77825	-8.54624	-19.4776	-20.2071	-19.1526	-14.8707	-8.11808	-6.3105	-9.37171	-11.4987	-12.9979
Pseudomonas fluorescens Pf-5	-11.6991	-16.0497	-15.4552	-13.0213	-13.4711	-7.17597	-16.104	-9.39226	-9.85273	-10.0847	-8.80937	-12.4961	-12.4752	-16.7858	-14.1937	-11.6075	-16.4371	-15.9174	-15.4813	-12.8249	-13.1544	-14.1301	-13.2844	-18.0858	-16.5707	-11.7716	-13.33	-11.4139	-16.1241	-15.4388	-14.1378	-7.97471	-15.1888	-8.46581	-16.2026	-7.27974	-10.746	-13.2111	-9.82796	-9.33029	-16.1408	-16.6821	-17.7693	-13.5052	-14.1161	-9.01281	-13.6278	-4.49178	-11.9599
Pseudomonas mendocina ymp	-17.3596	-20.5632	-23.6504	-17.2522	-16.1426	-9.96831	-28.3392	-18.3229	-18.0253	-18.8996	-9.72871	-15.8065	-22.6485	-15.8533	-18.5431	-15.6911	-19.0239	-15.0595	-15.7436	-12.3748	-17.874	-17.5622	-19.4903	-20.2137	-22.7484	-14.9809	-13.5184	-21.5651	-13.2957	-19.8954	-18.9569	-20.869	-20.0435	-18.8544	-18.1605	-17.448	-16.3556	-19.055	-13.9354	-8.9201	-29.107	-25.2577	-21.8237	-15.3328	-15.2738	-7.13946	-16.3781	-12.6935	-18.1981
Pseudomonas putida F1	-12.5971	-12.8859	-13.5958	-12.1898	-12.8422	-6.60371	-14.8488	-13.4366	-14.009	-12.634	-6.30923	-14.1535	-9.15739	-14.3244	-13.8806	-12.1641	-16.2331	-15.5335	-15.1299	-12.1541	-12.5612	-12.8546	-13.9095	-12.2296	-14.733	-11.9448	-14.9357	-11.5414	-15.7154	-18.7967	-18.5921	-8.97584	-15.1859	-13.2372	-13.2501	-10.4221	-12.098	-14.6625	-12.9307	-8.66	-20.7219	-13.5635	-18.3897	-14.9641	-11.2667	-7.53915	-7.55236	-5.64287	-11.1389
Pseudomonas stutzeri A1501	-21.1182	-21.2049	-27.6708	-16.2873	-21.3933	-11.3395	-30.9843	-23.1434	-21.9763	-21.1984	-12.1291	-22.4442	-28.0912	-18.366	-19.1728	-24.1766	-19.7948	-22.5115	-19.3151	-21.528	-24.1216	-20.2424	-18.0272	-28.1004	-27.6717	-22.9345	-20.0724	-20.5395	-19.8578	-21.9272	-22.2559	-22.7235	-25.8539	-25.446	-23.0249	-24.4277	-20.5658	-23.3967	-12.9472	-9.19324	-28.4574	-29.0165	-28.2224	-20.6381	-16.2377	-6.92812	-21.2168	-17.7221	-21.2047
Pseudomonas syringae pv. syringae B728a	-22.3332	-18.606	-21.3949	-18.9912	-20.6949	-9.46749	-29.0864	-20.2037	-18.8036	-23.0482	-9.18701	-14.0786	-18.8389	-13.2226	-14.8094	-15.0639	-16.1885	-17.4374	-17.049	-16.9919	-18.4184	-14.7927	-15.8219	-22.0195	-23.529	-15.7443	-12.8468	-12.3352	-15.625	-23.3965	-17.4605	-10.7409	-23.945	-16.9435	-22.0205	-16.2168	-17.9424	-19.5348	-16.7175	-12.5009	-15.3799	-15.0654	-12.0579	-20.8332	-17.0585	-9.22093	-15.2998	-12.4412	-15.9414
Psychrobacter arcticus 273-4	-15.0754	-18.284	-14.066	-14.1426	-12.3558	-12.0547	-18.7603	-15.6731	-14.6232	-12.898	-4.94225	-14.8092	-12.8469	-7.78049	-12.5772	-12.4201	-14.1352	-10.4146	-12.9689	-9.68208	-9.98292	-10.561	-9.35762	-11.4474	-13.3376	-13.6528	-9.62357	-17.265	-10.2098	-12.5032	-12.9289	-13.2665	-16.6547	-18.3755	-18.7032	-18.8123	-11.4383	-12.4072	-14.1971	-12.0776	-12.1542	-15.2764	-15.1086	-13.6588	-12.7172	-15.6291	-11.0843	-5.79735	-14.6654
Psychrobacter cryohalolentis K5	-13.1828	-15.1431	-15.6438	-9.40878	-14.2759	-7.49754	-15.4484	-15.5993	-14.2839	-8.2241	-8.88108	-17.0364	-13.3587	-10.7374	-19.2815	-14.0977	-19.3417	-14.7682	-15.4991	-10.6972	-15.9014	-16.9258	-14.2969	-14.3265	-18.1557	-15.9993	-11.5879	-18.6484	-13.7349	-15.7539	-16.4711	-17.3925	-11.5132	-13.2116	-16.2324	-15.2575	-12.1227	-12.626	-11.1866	-10.7483	-16.511	-17.8269	-18.4882	-16.0662	-14.9285	-8.24214	-9.95303	-8.92211	-14.1126
Psychrobacter sp. PRwf-1	-10.7115	-17.2047	-12.8332	-11.9339	-13.4241	-9.79373	-15.5616	-12.6494	-11.422	-18.4815	-6.04918	-14.7157	-13.2077	-14.2103	-19.8364	-15.1365	-19.0845	-16.0924	-17.8399	-9.79495	-13.0454	-15.5791	-14.7591	-14.9017	-14.7533	-15.7251	-13.0627	-16.6319	-12.3148	-15.0968	-14.7033	-11.4118	-16.5951	-17.2735	-17.4084	-17.4727	-13.5669	-15.7273	-12.0408	-8.9746	-10.3915	-13.6121	-17.3707	-14.343	-13.4462	-10.4618	-6.56041	-8.47985	-19.3277
Psychromonas ingrahamii 37	-20.8689	-26.6537	-25.7555	-10.4573	-24.8431	-11.2191	-32.2841	-24.8389	-23.8996	-30.4269	-10.0055	-19.6688	-27.1585	-23.3496	-25.3481	-22.0382	-22.2609	-17.2983	-19.3563	-21.7858	-21.5483	-18.5239	-23.0147	-18.8075	-19.4484	-17.7916	-14.1125	-23.5056	-19.9336	-27.2267	-15.7742	-21.5026	-23.565	-22.8239	-23.8418	-25.4381	-14.9886	-19.9981	-12.1745	-9.91091	-23.3977	-28.1106	-27.2408	-20.1795	-14.2714	-11.0601	-17.1282	-17.8902	-29.2511
Ralstonia eutropha H16	-11.14	-22.5183	-11.8232	-7.36129	-18.744	-9.40566	-16.4271	-12.774	-11.1922	-14.0591	-7.00456	-14.6601	-11.0024	-16.0036	-18.338	-19.8128	-19.5368	-13.0712	-18.6407	-14.1017	-19.4021	-12.2592	-16.4503	-20.4304	-23.9124	-20.1105	-16.5124	-14.7829	-17.3169	-16.0853	-14.3655	-14.3973	-7.5972	-9.96413	-12.5883	-14.633	-17.0136	-16.4529	-12.1902	-6.59976	-13.7076	-9.54545	-12.3237	-10.7297	-9.44758	-14.6782	-9.07206	-2.84155	-12.296
Ralstonia metallidurans CH34	-9.87317	-18.2341	-11.5978	-15.1546	-14.5764	-8.26665	-15.6258	-10.5425	-10.9861	-9.47036	-6.88677	-15.5581	-10.6829	-16.8685	-16.2486	-22.6856	-14.4746	-12.9776	-14.5421	-12.9328	-19.2507	-17.1791	-15.3481	-23.2209	-26.7043	-23.904	-18.3995	-14.5573	-18.1973	-21.6945	-15.2263	-13.139	-7.34892	-6.66167	-10.3541	-10.4178	-11.8505	-14.304	-12.9707	-7.43668	-12.3643	-18.022	-15.9877	-8.59258	-5.24743	-7.26988	-7.80191	-5.62869	-10.0914
Ralstonia pickettii 12J	-22.0918	-19.349	-15.2111	-14.809	-20.5597	-10.3432	-22.3955	-16.9886	-15.6138	-12.5133	-8.07442	-18.0109	-14.5461	-17.1306	-18.7443	-26.9725	-18.148	-20.3474	-21.9747	-15.842	-16.2863	-22.7362	-17.7413	-28.8245	-28.3398	-27.5589	-17.7659	-16.146	-15.5432	-13.0279	-19.3386	-12.5258	-13.7236	-15.6744	-16.8094	-12.0282	-17.799	-22.4175	-16.5229	-10.356	-16.0659	-9.61276	-16.7534	-17.712	-7.86627	-5.93984	-9.06993	-9.25649	-16.7595
Ralstonia solanacearum GMI1000	-18.3736	-22.6489	-20.4256	-13.0216	-23.7175	-7.48831	-21.2026	-21.2395	-20.8352	-17.1377	-8.20577	-18.09	-18.8878	-19.2381	-19.8203	-23.0792	-22.1953	-21.4523	-24.0614	-17.0169	-17.4404	-21.8021	-19.8353	-30.0519	-30.5604	-26.7752	-19.8603	-18.3668	-20.6387	-18.4579	-18.4808	-18.7768	-12.982	-14.9884	-17.0557	-14.2483	-17.9662	-20.5543	-16.7501	-7.52524	-22.4323	-25.1414	-19.1087	-16.8533	-10.0905	-4.26887	-12.3384	-15.4721	-15.9717
Renibacterium salmoninarum ATCC 33209	-23.6855	-26.4405	-22.5902	-13.3031	-22.7042	-15.1286	-38.8383	-22.6417	-21.7203	-37.0447	-10.9119	-21.5965	-27.9135	-20.2566	-24.2701	-28.9307	-24.2084	-22.186	-22.2656	-25.6312	-26.407	-20.4554	-27.9206	-28.6044	-36.2509	-32.602	-22.0234	-26.3287	-21.8485	-35.9182	-21.6404	-23.3123	-32.3705	-27.6058	-26.6565	-29.2674	-23.8512	-34.8704	-26.0307	-15.808	-22.1446	-27.7996	-23.9933	-31.0483	-25.1065	-20.9216	-17.9581	-16.7364	-31.0827
Rhizobium etli CFN 42	-19.5171	-14.8574	-14.3089	-16.8828	-21.3636	-13.0812	-21.5599	-17.2354	-16.7138	-21.6806	-11.728	-15.4343	-18.2582	-18.7032	-20.1385	-19.5291	-22.4001	-22.8548	-20.42	-17.7133	-19.0552	-21.0811	-20.2198	-19.9451	-18.4322	-18.6344	-19.2603	-19.2665	-17.051	-25.1705	-20.0465	-20.8057	-21.0223	-21.2619	-20.045	-16.1367	-18.6379	-22.1166	-18.679	-13.2191	-20.9071	-19.3281	-21.5414	-20.415	-15.978	-14.7516	-9.44719	-16.3499	-22.8235
Rhizobium leguminosarum bv. viciae 3841	-11.5247	-21.9328	-10.1672	-15.6666	-20.0036	-14.6056	-13.5792	-15.1129	-16.4961	-15.8996	-11.1726	-16.8261	-16.4672	-18.2216	-22.482	-19.0174	-22.6398	-22.2119	-21.7981	-11.3559	-23.6322	-21.3893	-16.6115	-12.7415	-13.2238	-12.4202	-18.6936	-16.1256	-17.5101	-14.6475	-16.5775	-16.7883	-15.9639	-18.4068	-19.933	-19.9539	-22.2582	-25.6862	-17.5077	-10.8341	-16.2047	-15.3038	-14.8129	-21.9377	-18.734	-9.2972	-12.4696	-15.1571	-16.6005
Rhodobacter sphaeroides ATCC 17029	-5.13064	-15.2187	-18.6808	-9.29705	-21.4011	-11.3458	-2.01706	-9.15549	-8.98707	-9.2251	-7.1352	-15.448	-18.107	-17.371	-18.1767	-20.1821	-19.7973	-16.5174	-18.3196	-21.5368	-21.1295	-17.2458	-19.0321	-19.112	-15.683	-17.9455	-16.0771	-21.5501	-23.8623	-15.9472	-16.2632	-23.7352	-11.8661	-16.4602	-14.0365	-11.4381	-18.574	-21.4036	-15.957	-10.2004	-18.474	-20.0385	-16.2386	-18.6454	-16.2483	-14.9395	-20.2284	-22.7319	-9.2149
Rhodococcus sp. RHA1	-9.56908	-20.1205	-13.2905	-8.57477	-14.8915	-8.13944	-23.5808	-10.1068	-8.40838	-29.0825	-9.62091	-16.454	-7.79036	-7.02959	-14.0224	-13.7783	-19.0499	-15.6753	-15.3807	-13.1731	-16.3927	-12.8843	-11.1913	-13.7082	-16.2114	-11.4033	-14.3624	-18.2368	-14.2295	-18.1936	-15.2798	-7.03743	-20.0623	-17.6815	-25.954	-22.9443	-15.0291	-18.5077	-6.37509	-9.45396	-11.5925	-12.3571	-11.2007	-11.62	-6.51199	-11.1217	-4.61504	-7.10358	-26.5389
Rhodoferax ferrireducens T118	-14.935	-15.1025	-27.3204	-11.9254	-19.8934	-11.7523	-15.1735	-15.9269	-14.6741	-17.9705	-7.52546	-18.6859	-24.121	-17.6903	-15.4215	-19.5218	-15.9491	-16.8811	-16.6033	-20.0935	-22.6249	-15.4573	-16.3381	-25.8445	-26.3914	-24.6331	-16.3707	-20.221	-14.1497	-9.22888	-14.7255	-27.4826	-22.6422	-17.3756	-18.7774	-19.1047	-17.0914	-19.8371	-16.5964	-10.6698	-24.5462	-26.4835	-26.2797	-16.1031	-9.92373	-6.70671	-17.9797	-16.364	-13.8646
Rhodopirellula baltica SH 1	-35.6445	-41.0638	-34.2804	-25.7641	-24.0902	-14.6677	-52.936	-27.2204	-26.5931	-54.1587	-19.2245	-21.8834	-30.6137	-27.2964	-26.5315	-26.0876	-24.6759	-32.2578	-29.8519	-31.4388	-31.7079	-26.4342	-22.6661	-33.8418	-30.3249	-30.5208	-26.7556	-35.2379	-25.5765	-43.8228	-23.6473	-33.916	-38.0812	-42.5469	-39.0428	-37.0574	-21.3375	-25.7647	-21.607	-15.9068	-30.3606	-37.5406	-30.967	-26.0059	-24.823	-27.4973	-30.5957	-28.2582	-39.6986
Rhodopseudomonas palustris BisA53	-21.9531	-24.2009	-31.1055	-25.7041	-18.4817	-23.272	-32.0016	-27.8641	-27.504	-29.2067	-17.0094	-21.9722	-29.3773	-22.0781	-21.7068	-26.9198	-20.1248	-25.2947	-20.9317	-28.7551	-27.2097	-21.7037	-22.6946	-34.7112	-33.23	-34.4513	-26.7194	-31.037	-24.4964	-24.8151	-22.2678	-34.4021	-24.5958	-30.5196	-29.6875	-28.9193	-30.7161	-36.3498	-29.4114	-22.273	-27.8851	-29.3542	-29.5782	-29.6416	-22.7552	-23.7825	-31.9384	-26.1503	-21.6543
Rhodospirillum rubrum ATCC 11170	-8.13054	-17.099	-18.8543	-9.49717	-14.7461	-8.84481	-17.4253	-12.1576	-11.0923	-17.0834	-5.64124	-12.1268	-14.8203	-18.9454	-19.8388	-20.7148	-19.5831	-21.0153	-19.927	-19.7974	-22.466	-18.9527	-18.6133	-20.1383	-19.7401	-19.0342	-18.6791	-20.6764	-20.4769	-20.3218	-16.6407	-23.7732	-10.8705	-11.3061	-13.0865	-9.57728	-11.8975	-15.8189	-9.16643	-7.62508	-14.1243	-16.2787	-16.9254	-16.0311	-7.38748	-10.065	-12.2984	-13.9297	-10.3719
Rickettsia akari str. Hartford	-28.728	-37.3338	-33.9583	-27.2748	-34.3711	-16.4685	-46.3728	-31.8831	-31.3229	-43.4276	-17.0827	-30.2061	-37.2622	-32.7775	-32.1419	-37.6046	-31.6686	-27.6618	-31.9217	-34.0038	-32.808	-28.5161	-34.1041	-44.5953	-45.745	-41.3799	-30.9697	-37.8253	-28.5363	-43.4926	-31.5377	-37.1752	-32.2963	-32.7981	-34.1503	-35.098	-30.9519	-37.0015	-24.0811	-17.922	-36.3896	-38.4877	-36.8234	-32.249	-26.7601	-20.1287	-27.702	-27.0996	-35.2585
Rickettsia bellii RML369-C	-31.7111	-40.1516	-37.6401	-29.9601	-38.5498	-16.5153	-51.5103	-37.0343	-36.358	-51.6178	-18.6723	-34.5394	-40.5804	-36.1142	-34.8369	-42.2534	-36.5047	-35.5727	-39.4067	-37.209	-37.1294	-32.7996	-37.8621	-50.0739	-52.1038	-48.566	-36.1	-42.6419	-31.8724	-46.9845	-34.6233	-41.9933	-37.1235	-38.5122	-37.8774	-37.8275	-36.152	-41.6493	-27.4375	-19.0825	-39.5528	-43.8021	-42.1426	-36.8336	-29.7901	-20.2048	-30.8211	-30.4164	-36.8364
Rickettsia canadensis str. McKiel	-24.8021	-31.6574	-28.7449	-23.7098	-31.011	-14.3771	-41.4079	-28.198	-27.7905	-39.4732	-14.495	-25.9712	-33.3296	-26.4787	-25.6199	-33.5052	-27.355	-26.616	-28.7449	-29.4563	-28.2295	-24.4333	-29.3373	-37.9304	-39.253	-35.9533	-26.9375	-32.5053	-25.2134	-36.4482	-27.2689	-30.8383	-26.7616	-27.2161	-27.6435	-29.6822	-28.1204	-32.4027	-22.6747	-15.7207	-31.5475	-32.2663	-30.8242	-27.3883	-21.9296	-17.8529	-23.5596	-22.95	-30.0536
Rickettsia conorii str. Malish 7	-31.4376	-40.2894	-37.7923	-30.4612	-37.5112	-16.8678	-50.5336	-35.3506	-34.7081	-50.6203	-18.8491	-33.7411	-41.8496	-36.0094	-34.9159	-41.9834	-35.5011	-31.6152	-36.2222	-37.1777	-37.0541	-31.0036	-37.9409	-49.6215	-49.6837	-47.2127	-35.052	-42.4339	-32.0813	-47.8736	-34.9261	-41.0991	-36.2451	-37.6833	-37.0383	-36.9798	-32.4682	-42.4394	-25.374	-19.3981	-39.8772	-42.0984	-40.4181	-35.9917	-28.489	-21.5592	-30.513	-29.0291	-40.0305
Rickettsia felis URRWXCal2	-33.5915	-43.8989	-40.4039	-35.168	-43.6375	-17.4609	-54.4604	-39.5726	-38.8501	-52.6013	-19.8783	-37.3101	-44.182	-41.3085	-37.7995	-46.8075	-39.6393	-36.5445	-40.7718	-42.2638	-40.2564	-34.5912	-39.7968	-53.772	-54.7637	-50.1085	-39.2273	-46.9277	-34.6239	-53.1555	-37.2294	-44.8329	-39.912	-42.2111	-41.5962	-40.5686	-37.6572	-47.0171	-30.9928	-20.0839	-44.0657	-44.329	-43.7249	-39.6236	-31.7281	-22.1352	-32.7377	-33.4707	-42.5266
Rickettsia massiliae MTU5	-22.212	-25.9824	-25.606	-20.7711	-24.9884	-11.9449	-36.4749	-24.3725	-24.0924	-35.6082	-13.777	-22.8236	-28.2759	-22.6481	-22.3233	-28.9812	-24.341	-18.8299	-24.0998	-21.219	-23.0293	-20.4164	-25.7997	-32.0397	-33.5034	-30.1933	-22.2952	-26.6756	-19.9641	-32.6869	-23.9229	-27.6115	-23.2897	-25.5927	-25.1484	-24.3161	-23.183	-29.354	-20.3618	-14.2139	-28.5092	-29.8068	-28.686	-23.6322	-19.5065	-15.1456	-19.7795	-19.3087	-27.8592
Rickettsia prowazekii str. Madrid E	-20.1194	-23.7151	-23.2577	-19.3917	-24.9942	-11.163	-32.7236	-22.3272	-21.2294	-32.0393	-12.7257	-22.9327	-25.8752	-21.0254	-22.2971	-28.7956	-24.7168	-20.1394	-23.7511	-20.8888	-21.8046	-21.6848	-25.4463	-29.0252	-32.6776	-28.3087	-22.886	-25.5772	-20.925	-30.4712	-21.6462	-23.142	-21.4052	-23.3682	-21.1922	-23.6001	-22.0265	-26.4496	-17.5153	-13.3358	-26.0705	-26.6286	-27.1375	-20.8827	-18.7531	-13.7468	-18.4079	-17.3011	-22.3777
Rickettsia rickettsii str. Iowa	-31.6705	-40.63	-38.1284	-31.7354	-36.8802	-16.9867	-51.894	-35.6561	-35.0073	-49.9843	-19	-34.0643	-41.1642	-36.3898	-35.2611	-41.3892	-35.859	-31.9692	-36.6149	-36.5464	-38.4305	-31.3254	-38.2874	-48.0663	-51.1222	-46.6397	-35.4213	-42.8362	-32.4036	-48.2573	-34.2319	-41.4435	-36.5878	-39.0178	-37.3743	-37.3169	-32.775	-42.8384	-25.5691	-19.5237	-40.182	-42.4097	-40.7319	-36.3252	-28.7262	-21.6784	-30.7528	-29.2824	-40.3595
Rickettsia typhi str. Wilmington	-20.1799	-23.7968	-21.3184	-17.456	-23.0459	-10.1987	-32.8175	-20.3829	-21.2812	-31.1283	-11.7657	-22.9629	-24.9388	-21.0687	-22.3295	-29.8302	-23.7412	-17.185	-21.7888	-20.9477	-20.8609	-22.712	-24.4852	-29.0964	-31.745	-30.3777	-22.9253	-25.6516	-20.9582	-29.5504	-21.6851	-24.2053	-20.4779	-21.4493	-20.2666	-22.6689	-21.0839	-27.4985	-17.572	-12.3735	-25.1355	-25.711	-25.2045	-20.9304	-18.8052	-13.7989	-18.4743	-16.358	-20.4416
Roseiflexus castenholzii DSM 13941	6.29621	-16.8499	-12.1386	-1.74608	-19.7547	-4.63509	-17.5467	-2.70794	-4.47952	-15.4667	-0.413942	-9.61903	-7.83141	-21.6002	-22.3533	-24.427	-22.907	-23.7801	-23.5243	-18.9368	-22.4858	-18.3984	-21.2527	-24.6384	-26.1921	-24.4394	-17.2883	-22.0308	-19.0688	-14.8629	-10.5959	-10.2699	-6.42126	-9.11353	-6.56646	-4.91533	-1.94495	-7.7155	-0.412255	-4.53423	-9.23925	-9.06526	-8.98178	-3.97471	-9.73117	-4.47949	-11.7633	-10.1834	-9.68034
Roseiflexus sp. RS-1	4.82025	-20.3685	-15.5112	-5.11416	-19.0378	-6.87669	-16.843	-4.15603	-4.87747	-20.5054	-3.64285	-12.7557	-11.4257	-18.7846	-23.4921	-27.6201	-23.9926	-23.985	-25.6848	-26.2566	-25.7695	-18.5183	-23.4265	-25.0587	-32.5985	-26.8348	-19.4563	-21.4201	-21.2342	-19.6139	-8.85984	-15.7059	-4.87418	-7.6519	-4.99883	-9.30324	-8.24437	-12.9635	-5.7917	-2.81385	-11.8699	-15.9287	-9.5937	-6.23644	-10.126	-9.95357	-15.2091	-12.5542	-11.0576
Roseobacter denitrificans OCh 114	-5.12134	-17.2084	-17.6733	-13.2897	-22.3952	-10.3411	-5.99253	-15.1464	-11.979	-12.205	-8.13065	-16.4452	-18.0951	-16.3672	-18.1738	-18.178	-19.7954	-20.513	-20.3162	-21.5302	-20.1236	-13.2433	-22.0284	-17.1033	-21.6745	-16.9373	-19.0736	-26.5422	-19.8589	-14.9322	-15.2577	-21.7264	-15.857	-10.4495	-13.0278	-13.4303	-18.5679	-22.3984	-17.9496	-13.195	-9.46157	-17.022	-12.2265	-18.64	-17.2404	-17.931	-21.2197	-19.7245	-11.2072
Rubrobacter xylanophilus DSM 9941	9.40026	-6.96556	-1.61186	0.499881	-16.9843	0.892477	4.05425	-1.30984	0.41757	-0.770977	3.16998	-8.65954	4.92525	-14.0741	-16.2512	-18.5289	-19.4951	-17.7621	-19.0819	-13.7386	-10.6596	-11.5515	-16.7147	-26.1269	-20.8344	-18.2909	-14.8778	-16.1975	-9.76083	-4.35433	-9.97766	1.94853	0.919495	-2.08545	-2.47618	-1.23872	-5.19539	-5.26051	-2.40081	4.34661	2.76325	4.6643	2.85844	-4.42333	-5.19023	-2.45361	1.97732	6.05754	-0.0749432
Saccharophagus degradans 2-40	-25.7263	-29.7688	-31.3511	-26.9762	-26.1424	-18.1427	-44.9577	-30.7572	-29.6308	-39.3554	-20.9366	-18.3221	-31.5902	-26.2033	-24.045	-18.9998	-22.7145	-24.3213	-23.1667	-24.2444	-28.8678	-23.1318	-21.8683	-32.7269	-33.3102	-31.5848	-23.9211	-30.2024	-23.7108	-40.2941	-23.0182	-30.3509	-30.4677	-32.9958	-30.6563	-31.0945	-28.305	-33.1737	-29.6369	-19.9668	-33.9305	-35.3224	-33.7101	-31.4033	-24.9029	-19.5764	-24.852	-23.4099	-31.8789
Saccharopolyspora erythraea NRRL 2338	-13.561	-12.9724	-17.2012	-10.696	-18.0295	-3.62443	-25.6875	-14.1453	-12.5253	-20.9783	-10.1883	-14.8431	-15.5115	-13.2439	-17.4967	-18.0383	-20.6505	-16.2257	-14.8141	-21.3808	-20.6549	-15.4026	-18.6278	-13.7717	-14.2542	-9.45041	-18.712	-16.1593	-17.5298	-26.7005	-14.5984	-14.8266	-16.9993	-19.4491	-18.9661	-21.985	-12.282	-14.7097	-7.53777	-8.85613	-14.2519	-17.3755	-13.8594	-12.9581	-9.761	-13.3575	-12.5076	-10.1876	-22.63
Salinibacter ruber DSM 13855	-18.3083	-32.1445	-19.2288	-26.4151	-22.7881	-9.99811	-16.8947	-5.57409	-5.03785	-22.2178	-9.6056	-24.3533	-18.8602	-27.4772	-21.821	-22.5659	-25.4187	-24.8789	-24.4259	-21.3763	-23.4365	-21.261	-18.0813	-31.0575	-31.8239	-29.4257	-28.309	-31.6019	-20.2821	-18.3403	-15.8519	-20.366	-24.4048	-24.2318	-25.9316	-24.8286	-18.1814	-23.1385	-15.6171	-11.4111	-16.9909	-19.6603	-16.9393	-21.3542	-16.008	-24.0136	-17.8878	-12.8787	-23.6778
Salinispora arenicola CNS-205	-21.0269	-25.2798	-22.1618	-12.76	-25.5233	-12.3099	-30.211	-14.9305	-15.5626	-30.3699	-12.0441	-20.9928	-27.4672	-21.106	-21.7268	-27.9479	-21.1371	-23.3229	-22.9546	-18.8014	-24.2506	-20.721	-22.7195	-31.7717	-28.2886	-27.5087	-24.7442	-27.0951	-16.5213	-30.9285	-11.3056	-19.468	-25.6639	-31.602	-29.7525	-29.9773	-17.7603	-21.3859	-10.4707	-8.3172	-24.9814	-27.4917	-27.6715	-19.6792	-16.8144	-16.8659	-16.0084	-13.2068	-31.7104
Salinispora tropica CNB-440	-19.225	-22.4175	-19.5462	-14.1489	-23.0643	-10.8997	-28.9674	-17.1981	-16.9148	-27.6044	-10.6645	-18.7685	-22.4818	-15.8019	-21.505	-26.638	-22.0005	-22.0039	-25.6997	-19.2864	-22.7959	-19.5294	-23.4426	-29.0979	-25.6364	-26.8716	-21.472	-27.4566	-17.2497	-29.6848	-11.8844	-20.7469	-27.9168	-31.7028	-31.0395	-28.3397	-16.2724	-23.9866	-14.8278	-8.84053	-21.9295	-27.0113	-27.6516	-15.2608	-20.1633	-13.9999	-17.2516	-15.5893	-31.093
Salmonella enterica subsp. enterica serovar Typhi str. Ty2	-14.6712	-18.8142	-13.1128	-11.7207	-22.735	-5.61859	-29.4588	-19.6769	-19.4519	-30.3958	-5.39818	-14.6095	-19.7905	-20.5874	-17.3435	-23.4134	-16.901	-15.7656	-18.513	-18.9145	-19.466	-21.39	-20.2405	-19.6091	-17.1637	-18.4118	-17.2766	-23.0038	-20.0573	-32.8111	-14.5774	-17.2398	-17.39	-18.0765	-16.5366	-14.8885	-14.9242	-14.6982	-6.38632	-6.51516	-20.1959	-21.0065	-19.9397	-17.9564	-6.70392	-6.44792	-1.73278	-5.15788	-17.6542
Salmonella typhimurium LT2	-15.1989	-23.3892	-15.526	-13.1288	-23.049	-6.88641	-28.8955	-19.1738	-18.8932	-31.5472	-5.65198	-15.7611	-20.4494	-18.7919	-17.4976	-19.6277	-17.996	-15.993	-17.6911	-19.2692	-18.7806	-20.523	-20.4333	-20.0753	-14.6146	-19.8504	-17.4629	-20.4356	-20.2408	-32.6439	-15.8702	-17.7232	-15.8922	-17.6734	-16.016	-14.3187	-14.2562	-13.9733	-6.80696	-6.82512	-19.8951	-21.9636	-21.6182	-16.2467	-7.14177	-5.97313	-2.22704	-4.56905	-16.0726
Serratia proteamaculans 568	-14.0734	-15.3294	-13.1971	-7.79509	-18.5494	-5.33375	-18.3431	-17.9721	-17.5993	-23.4726	-3.06582	-16.0057	-10.5237	-18.1236	-16.7393	-18.9655	-18.1449	-14.3405	-17.969	-13.8305	-19.2762	-19.7319	-14.7351	-19.8096	-14.3253	-17.5447	-17.7597	-14.1316	-19.537	-24.9997	-15.3292	-10.5094	-11.7067	-9.65384	-12.7932	-12.0137	-10.788	-12.4086	-3.5081	-4.345	-15.042	-13.5784	-9.73021	-6.70271	-5.85157	-0.918805	-5.05247	-4.24241	-12.7455
Shewanella amazonensis SB2B	-20.327	-26.1826	-21.1619	-20.8389	-22.1813	-6.44554	-36.409	-19.3253	-18.3408	-34.3856	-9.23786	-21.8427	-25.7666	-28.5744	-24.5353	-26.2961	-23.3854	-26.5697	-25.574	-26.1635	-27.8922	-20.6879	-19.2417	-29.3039	-25.9307	-30.2549	-21.3272	-32.9398	-21.139	-38.9927	-20.0995	-22.9715	-27.0453	-25.3654	-28.2997	-26.8586	-12.3258	-19.3075	-10.5341	-7.16881	-22.0275	-30.8915	-25.8559	-12.4988	-13.6803	-17.4139	-18.5529	-16.2712	-31.6655
Shewanella baltica OS155	-24.1121	-27.2951	-26.4586	-23.0621	-21.9981	-7.84229	-37.6574	-19.093	-17.8215	-35.3574	-9.61047	-22.7365	-30.3416	-25.7586	-28.4728	-27.5931	-22.9807	-20.9566	-24.6625	-24.2118	-24.7298	-23.5015	-22.4023	-24.9999	-22.5417	-26.7794	-21.4328	-27.3653	-22.211	-36.5078	-20.823	-24.6443	-27.8103	-25.5756	-25.9378	-26.2486	-23.2023	-25.9288	-15.7377	-9.77398	-27.7806	-33.8054	-31.507	-17.1999	-21.0703	-18.8847	-22.1456	-17.5018	-30.0045
Shewanella denitrificans OS217	-21.7883	-31.7105	-27.5626	-28.2185	-24.5099	-7.67442	-42.5596	-20.8064	-18.7758	-37.3578	-12.4701	-24.0089	-31.3736	-25.7908	-25.7132	-27.5415	-22.5019	-25.8302	-26.781	-28.5318	-28.2261	-21.8434	-23.459	-26.7886	-26.4011	-29.7075	-24.533	-33.3666	-24.3363	-37.7581	-17.4148	-29.435	-30.5218	-31.9069	-33.7539	-28.2742	-20.6571	-26.6059	-18.8968	-12.4301	-28.6584	-37.6851	-34.4714	-23.8087	-20.0879	-17.7826	-18.9808	-17.6508	-34.0742
Shewanella frigidimarina NCIMB 400	-25.8001	-24.8511	-29.4117	-26.035	-21.1902	-10.1796	-39.1498	-21.8304	-19.6963	-38.5137	-12.973	-22.3454	-29.6848	-27.2343	-23.0695	-26.0337	-19.7299	-23.3578	-26.1952	-23.2984	-29.9162	-21.153	-19.8987	-24.798	-28.3791	-27.6513	-23.95	-28.2664	-21.7388	-37.4137	-20.0635	-28.4214	-28.5408	-28.0807	-29.7261	-27.1576	-20.3546	-26.2163	-16.6952	-11.0093	-32.0299	-35.4525	-32.8068	-21.4481	-18.9662	-16.6416	-18.9206	-20.4688	-29.9407
Shewanella halifaxensis HAW-EB4	-19.5606	-23.693	-21.0253	-16.6345	-19.6677	-5.56266	-30.1615	-18.5713	-15.3579	-35.1556	-7.34463	-21.5771	-20.6514	-20.5438	-24.3102	-21.3672	-24.8803	-22.7161	-23.4744	-16.8384	-21.3983	-19.3612	-21.1988	-12.509	-21.067	-18.3179	-17.2366	-28.912	-19.018	-32.6353	-16.5144	-27.1374	-25.2836	-23.9509	-23.4351	-19.7972	-18.8534	-22.639	-12.2984	-5.45056	-22.0487	-31.8075	-22.7968	-13.894	-12.6113	-12.3416	-18.6295	-16.0712	-24.5653
Shewanella loihica PV-4	-17.1987	-21.176	-24.9118	-16.5523	-23.7924	-5.87878	-24.5988	-19.227	-18.1547	-30.2283	-8.67517	-17.1498	-25.9088	-21.9756	-22.8631	-24.7484	-23.5987	-22.0513	-23.9553	-23.8495	-28.513	-19.9739	-22.6433	-22.2068	-27.8066	-26.0983	-17.7075	-23.7374	-20.5043	-32.4335	-18.6849	-22.84	-23.9394	-20.3852	-24.1522	-21.6371	-15.9447	-20.8605	-13.2201	-4.664	-25.2168	-26.3974	-26.0155	-17.0746	-10.4468	-11.1221	-20.3617	-16.985	-24.4306
Shewanella oneidensis MR-1	-23.0581	-32.2365	-27.4165	-23.0205	-22.9663	-11.8148	-43.5095	-23.0424	-20.7767	-37.2393	-8.58458	-28.7212	-29.2744	-26.7379	-27.4572	-27.5715	-24.9711	-23.9337	-28.6446	-26.1759	-30.698	-23.4881	-24.3828	-27.9527	-26.496	-26.7349	-22.4139	-30.3214	-27.1924	-39.4228	-20.7934	-31.5951	-27.7591	-26.5147	-29.889	-25.2048	-24.1686	-25.901	-17.6946	-10.7422	-30.7092	-38.7071	-35.4378	-24.1705	-20.0257	-21.83	-25.095	-23.4598	-27.9619
Shewanella pealeana ATCC 700345	-21.4557	-22.5776	-23.9418	-18.5525	-18.6034	-6.50963	-32.8804	-17.4705	-15.2681	-36.928	-10.2937	-21.546	-23.519	-21.5021	-25.2782	-21.3228	-24.8605	-22.6685	-21.4374	-18.7657	-23.3336	-20.3336	-18.1588	-18.4133	-22.9744	-18.228	-16.1982	-26.8244	-19.9805	-36.468	-18.454	-24.0398	-28.1823	-25.8314	-27.3383	-23.7102	-20.7858	-23.5824	-13.215	-6.38935	-21.9088	-33.6191	-28.6609	-16.8341	-18.5231	-7.24185	-20.5315	-15.9887	-27.4804
Shewanella putrefaciens CN-32	-26.6065	-31.6348	-28.2523	-24.8805	-23.0642	-9.08265	-38.647	-18.6379	-17.5238	-35.0988	-10.8775	-26.2838	-28.4362	-26.1526	-27.0047	-26.9441	-22.689	-24.2614	-25.1199	-26.1561	-29.7886	-24.0969	-23.8184	-27.6106	-27.1977	-28.4759	-23.8736	-32.098	-24.6648	-38.0996	-19.9439	-29.2359	-27.3486	-26.8576	-27.5427	-23.9916	-23.2242	-28.104	-16.5422	-10.8978	-28.7689	-37.1115	-33.553	-21.33	-18.8	-20.4714	-23.7406	-22.3139	-28.7781
Shewanella sediminis HAW-EB3	-16.1316	-20.3163	-23.4737	-17.0771	-19.0096	-9.85218	-32.7107	-18.1111	-16.8376	-29.4	-6.61979	-16.7421	-24.3658	-21.7661	-22.4784	-20.6009	-21.9841	-20.9648	-23.6689	-23.2247	-21.7412	-18.5064	-20.4092	-18.0168	-20.558	-15.7953	-18.4396	-25.3811	-21.2177	-36.5383	-17.8336	-29.662	-25.8287	-25.5976	-23.9554	-20.2643	-19.2144	-22.9388	-9.75323	-7.78544	-24.8062	-24.8409	-25.532	-17.2104	-12.0863	-10.9044	-21.1639	-20.5169	-22.0198
Shewanella sp. ANA-3	-22.7841	-28.9378	-27.2019	-22.8085	-20.8031	-7.67579	-41.7639	-19.7843	-19.5474	-36.6416	-8.45275	-26.6424	-30.9322	-25.6317	-28.3772	-29.4602	-25.9218	-23.8155	-26.552	-24.9915	-28.5344	-23.419	-22.2826	-26.7104	-29.2617	-27.507	-21.3171	-29.0971	-25.097	-37.9903	-21.6412	-27.344	-26.4982	-28.2047	-27.6399	-25.9813	-21.996	-23.758	-17.4762	-9.58128	-28.346	-36.2103	-31.0854	-22.0196	-18.7982	-20.5578	-23.8384	-22.2463	-29.7446
Shewanella sp. MR-4	-22.4373	-24.4449	-25.1118	-22.7448	-22.9525	-8.99799	-38.2103	-18.4683	-17.3716	-29.737	-7.79375	-25.2289	-27.218	-26.0799	-27.9469	-27.8641	-25.6522	-24.1754	-28.0527	-25.03	-26.6754	-23.0467	-20.7467	-25.4445	-29.0369	-26.3206	-21.8056	-26.9494	-25.599	-35.824	-20.8376	-27.0724	-26.1796	-25.662	-28.3814	-22.8453	-21.109	-24.0041	-15.4085	-8.80066	-29.5402	-34.8145	-31.3304	-20.2251	-18.6539	-19.325	-23.5834	-20.1778	-28.6348
Shewanella sp. MR-7	-24.7499	-26.7951	-25.3706	-20.995	-22.1577	-8.15448	-39.0191	-18.7807	-17.6518	-31.406	-7.94824	-25.3295	-28.6205	-26.2133	-28.0529	-28.0107	-25.7194	-25.333	-28.1758	-26.2617	-25.8833	-22.1386	-20.8781	-24.7497	-27.3323	-26.6061	-19.9303	-27.2229	-25.7198	-36.3324	-20.0327	-26.3735	-26.4911	-26.0229	-28.6786	-25.1147	-20.3209	-24.1874	-16.6555	-8.98036	-27.9623	-35.364	-30.7411	-23.4177	-17.9232	-19.5972	-22.8739	-20.4287	-28.8987
Shewanella sp. W3-18-1	-26.8497	-31.9065	-29.4524	-25.0745	-24.2222	-9.20456	-39.2794	-19.8795	-19.7403	-35.6203	-10.9974	-25.361	-29.7484	-26.2551	-27.0859	-28.0563	-22.7403	-23.3821	-26.2142	-27.3345	-29.9486	-24.1672	-23.9191	-27.8456	-27.4252	-29.6959	-23.9694	-32.3093	-24.7576	-37.494	-20.0939	-29.4688	-27.5899	-27.1378	-26.7729	-25.2	-23.3878	-28.2448	-16.7345	-11.0379	-31.0967	-37.5403	-33.8718	-20.4781	-19.0087	-20.6857	-23.9668	-22.5085	-28.9821
Shigella boydii Sb227	-15.5718	-19.7052	-18.0341	-14.6433	-22.6746	-7.56832	-32.1915	-19.582	-20.3674	-28.1799	-7.35006	-16.5804	-20.6655	-20.5482	-17.3136	-22.3719	-16.8824	-16.7211	-22.4784	-22.8461	-21.4052	-18.3641	-19.203	-26.5192	-23.0768	-22.3274	-19.2406	-26.9213	-21.022	-27.6531	-16.5208	-16.1478	-18.2944	-18.9636	-16.4454	-18.8065	-15.8606	-19.645	-12.3073	-9.4571	-22.0636	-23.8276	-27.8113	-16.9003	-9.62069	-6.35233	-8.63993	-12.08	-18.5743
Shigella dysenteriae Sd197	-17.1437	-20.3294	-23.4831	-16.0864	-23.0167	-7.85833	-34.7439	-19.1224	-19.8476	-28.4264	-8.62558	-14.7455	-24.3809	-22.7708	-17.4818	-23.6057	-16.9863	-16.9699	-20.6729	-23.2327	-22.7483	-20.5094	-18.4136	-27.0274	-25.5682	-26.8052	-19.4438	-24.3909	-21.2218	-28.5573	-17.8402	-15.6731	-21.8401	-22.6112	-16.9663	-18.2741	-15.2219	-16.945	-11.7629	-9.79258	-21.8222	-24.8629	-25.5475	-17.2169	-10.0963	-9.91674	-7.17525	-12.5263	-19.0293
Shigella flexneri 2a str. 2457T	-14.9053	-16.9684	-21.4979	-14.1187	-23.2579	-8.23249	-29.4248	-18.9344	-19.7895	-25.7398	-8.02474	-15.3784	-21.8196	-23.2783	-17.1041	-23.0816	-18.7517	-18.4093	-24.2354	-22.3749	-19.9848	-20.183	-20.9417	-29.8988	-25.4767	-26.7457	-17.9909	-25.3573	-20.7785	-26.584	-17.1278	-14.5218	-18.6448	-18.2018	-13.8253	-19.2474	-15.4249	-17.2766	-9.77852	-10.07	-21.1715	-22.6387	-23.9445	-17.5116	-10.0563	-5.73543	-8.01858	-11.5528	-19.0285
Shigella sonnei Ss046	-14.068	-21.2472	-18.4242	-14.0281	-21.9721	-6.81985	-33.5365	-20.0517	-19.7849	-29.2609	-6.58932	-15.724	-21.2867	-20.7417	-17.4601	-22.5755	-18.9729	-16.9379	-22.6478	-19.1825	-18.7038	-20.4906	-21.3864	-25.9614	-22.5044	-21.7431	-18.4174	-23.3294	-21.1958	-29.4384	-15.7988	-12.6041	-18.7685	-19.5258	-13.8979	-17.2128	-15.1747	-17.9061	-8.70249	-7.748	-20.7222	-23.7251	-23.4504	-13.1759	-8.03385	-5.83999	-9.10426	-11.4675	-16.9697
Silicibacter pomeroyi DSS-3	-4.48716	-14.6122	-13.9668	-4.57714	-19.6228	-4.52553	-1.96461	-11.5008	-9.29512	-10.9962	-7.30898	-12.5553	-13.5587	-15.5146	-18.2878	-20.3361	-21.8665	-21.6829	-20.4485	-20.7875	-15.3531	-15.3419	-18.1708	-20.4421	-23.0023	-21.255	-16.2098	-24.8507	-18.9918	-10.5182	-12.4721	-22.0691	-8.21271	-9.86726	-9.36737	-13.7363	-16.8061	-17.5994	-15.24	-9.4077	-11.9508	-10.6756	-14.7017	-15.8521	-13.5496	-14.2717	-19.5609	-19.0134	-7.50589
Silicibacter sp. TM1040	-9.21742	-17.1972	-14.9276	-9.56751	-22.8051	-4.88814	-6.64673	-9.24602	-11.1719	-9.2682	-6.68451	-14.1561	-12.9332	-16.9839	-21.8698	-23.7577	-20.603	-20.0612	-19.9631	-21.8638	-23.5258	-17.9797	-20.6515	-23.2257	-23.8248	-22.1159	-18.7153	-24.7542	-21.5119	-16.4643	-13.697	-20.8583	-12.9583	-11.407	-14.1703	-12.6535	-14.9577	-17.8719	-10.2349	-9.67472	-14.2422	-11.4301	-7.04029	-14.0866	-13.4631	-9.13791	-14.3791	-20.0002	-15.4467
Sinorhizobium medicae WSM419	-12.7729	-19.1278	-16.5153	-10.0776	-18.5154	-7.2144	-22.3251	-11.4559	-11.9092	-14.2483	-9.84223	-15.522	-16.5632	-17.8204	-21.2167	-14.6402	-20.4527	-19.9428	-20.5068	-16.8705	-14.195	-19.1506	-16.3112	-17.143	-14.6272	-15.8275	-18.3591	-22.4744	-17.1547	-19.5473	-18.1751	-24.044	-18.2565	-18.5487	-21.2667	-19.3381	-20.7902	-23.2501	-15.8884	-12.3754	-19.2355	-19.826	-16.8618	-20.5421	-20.1718	-11.1209	-18.7014	-13.5496	-20.0155
Sinorhizobium meliloti 1021	-11.7777	-17.1329	-15.5192	-10.0813	-20.5183	-6.21692	-21.3396	-13.4601	-12.9129	-15.259	-10.8444	-15.5237	-14.569	-14.8227	-20.2182	-14.6423	-19.4538	-17.9445	-18.5085	-14.8735	-12.1977	-18.1519	-14.3129	-10.1467	-6.63087	-14.8312	-17.361	-20.4783	-16.1567	-17.5544	-15.1776	-21.0485	-18.261	-16.5541	-19.2709	-19.3419	-21.7931	-24.2527	-17.8924	-8.37833	-18.2417	-18.8354	-18.8679	-24.5445	-19.1755	-11.128	-15.7062	-11.5534	-22.0191
Sodalis glossinidius str. 'morsitans'	-15.2381	-23.2153	-22.7104	-16.4635	-23.343	-7.52399	-31.5585	-22.6717	-22.3528	-29.3281	-8.91209	-19.0831	-16.4392	-18.7917	-24.3326	-26.1673	-21.3853	-22.8286	-23.5579	-22.7666	-24.9688	-21.9732	-23.3518	-26.4152	-27.2435	-25.0824	-19.6421	-27.7222	-22.7855	-33.8534	-16.5354	-19.4656	-21.5842	-22.2838	-17.2999	-20.3233	-22.1798	-24.6943	-15.2296	-8.77746	-17.5905	-23.9107	-20.5676	-22.1288	-14.9838	-11.272	-17.0052	-13.9757	-23.1784
Solibacter usitatus Ellin6076	-17.942	-29.3936	-16.5763	-12.0123	-16.3196	-9.82116	-34.8121	-11.4931	-13.8409	-45.7941	-17.3527	-22.0402	-20.9819	-19.4997	-25.6663	-30.2784	-21.7761	-27.3783	-25.9979	-27.6546	-23.9065	-17.5571	-18.8128	-37.1001	-34.5869	-35.7816	-19.9238	-32.5311	-19.7571	-40.2592	-15.8305	-10.2479	-24.3804	-24.9005	-24.322	-23.3237	-15.5429	-17.9747	-11.8537	-10.0859	-14.7505	-23.1284	-19.3541	-16.1845	-13.0436	-21.0069	-4.91428	-12.5163	-28.9509
Sorangium cellulosum 'So ce 56'	-25.6653	-23.2368	-16.4128	-21.6667	-23.9918	-6.18744	-39.8385	-19.207	-19.5022	-39.2725	-13.662	-20.5291	-21.9193	-24.125	-26.0873	-26.8687	-20.1009	-29.7277	-30.4501	-28.262	-34.4773	-21.9442	-21.2594	-36.8111	-34.318	-30.5093	-22.4416	-30.3576	-16.3148	-37.3397	-14.3579	-16.1712	-21.1745	-22.8065	-23.0575	-23.0482	-15.1116	-16.6024	-9.45512	-11.5089	-20.7248	-26.543	-21.3351	-14.6955	-11.5847	-13.2939	-15.7263	-15.1999	-21.6374
Sphingomonas wittichii RW1	-30.7374	-33.0343	-17.7029	-22.2952	-22.9206	-13.6763	-44.2572	-19.5596	-18.1174	-41.9459	-16.3738	-23.1941	-17.3261	-22.3793	-23.9187	-20.2178	-22.2572	-26.5836	-24.1731	-23.2397	-24.6367	-20.8878	-19.956	-24.3401	-26.8405	-26.0505	-24.9833	-29.6509	-20.7641	-36.0083	-18.6616	-20.1009	-25.3136	-29.3932	-23.3716	-26.5309	-23.1803	-26.7304	-16.0443	-13.7448	-18.9033	-18.8298	-21.5657	-23.0331	-21.3767	-22.7133	-17.6873	-15.7501	-30.2435
Sphingopyxis alaskensis RB2256	-25.9526	-30.3908	-25.9595	-23.8117	-21.2939	-15.2794	-38.7522	-18.7156	-17.9567	-35.4851	-18.0154	-22.8339	-22.5615	-25.2914	-23.4415	-22.7905	-26.6321	-28.0223	-26.3028	-28.0762	-25.9737	-21.7214	-26.9369	-31.5677	-33.2653	-32.7021	-23.0897	-36.5737	-20.9613	-34.9641	-17.2773	-19.4466	-26.478	-30.5172	-28.8545	-31.5933	-29.4876	-32.5539	-22.676	-13.847	-25.7323	-24.9132	-26.6288	-25.7156	-16.5195	-18.6898	-19.3505	-19.2518	-28.4266
Staphylococcus aureus RF122	-7.16064	-26.1142	-2.61709	-9.38683	-15.2489	-2.48693	-10.4042	-4.57028	-4.25627	-23.1824	-6.86864	-19.0176	-4.32643	-11.7155	-21.2609	-16.0697	-21.3242	-15.744	-19.4755	-13.6693	-11.8743	-14.9067	-14.2748	-14.2909	-13.1204	-11.9659	-15.5661	-16.6187	-16.7146	-10.7139	-9.44526	-2.36313	-13.4846	-13.1826	-14.2053	-18.231	-10.0998	-12.5985	-9.16936	-4.73662	-10.4791	-11.7932	-6.45642	-14.0411	-8.90633	-9.23017	1.0679	-3.90061	-17.0862
Staphylococcus epidermidis RP62A	-12.3479	-18.3585	-4.84227	-9.57198	-17.476	-3.57658	-12.7778	-6.81529	-7.48937	-18.5349	-7.97365	-17.1752	-5.59904	-12.8991	-19.4335	-17.3046	-20.4711	-10.948	-12.6739	-15.9041	-13.1022	-15.0668	-16.4604	-14.5911	-11.4174	-9.24718	-14.7492	-15.8686	-12.8854	-13.0512	-9.66277	-6.61059	-9.72512	-13.4273	-15.4339	-14.4538	-8.29282	-7.82936	-5.31508	-2.83543	-7.74852	-5.07763	-5.72513	-11.2528	-10.0937	-7.33153	-4.10882	-2.08203	-17.3088
Staphylococcus haemolyticus JCSC1435	-15.8895	-30.3488	-11.6475	-14.0727	-29.2667	-4.31566	-26.9113	-13.8011	-14.3709	-29.4677	-7.83024	-24.382	-14.8307	-22.317	-30.7559	-24.1083	-29.5705	-23.5439	-24.1965	-23.7695	-20.9024	-25.2874	-24.8985	-22.9844	-22.7818	-23.4877	-26.1599	-25.8647	-24.2041	-24.8169	-17.3835	-13.6042	-20.6709	-22.4241	-24.2834	-23.2463	-9.83604	-19.6328	-8.51405	-2.65252	-16.9628	-17.4429	-15.9285	-22.9266	-19.6232	-7.18707	-5.55936	-5.5557	-26.0996
Staphylococcus saprophyticus subsp. saprophyticus ATCC 15305	-9.216	-18.1864	-3.68378	-7.44162	-13.3162	-5.51342	-4.5145	-5.64279	-6.32527	-16.2865	-6.8997	-15.0644	-5.40704	-9.77005	-19.3122	-14.1395	-17.3679	-9.8045	-14.5344	-9.73888	-9.94189	-14.9543	-15.3299	-8.3798	-10.2084	-8.04923	-14.6205	-14.6927	-12.7653	-6.81363	-9.50974	-2.4364	-10.5558	-12.255	-12.2729	-12.297	-8.15698	-10.667	-5.21244	-2.76582	-6.55871	-8.87723	-7.53587	-9.10384	-9.96174	-8.26008	3.01565	0.0457105	-15.1521
Streptococcus agalactiae 2603V/R	-19.1362	-33.3677	-31.1487	-22.2076	-42.4457	-12.0838	-44.8706	-25.7577	-23.7053	-40.0059	-10.978	-32.8818	-34.9367	-34.862	-41.6561	-40.5251	-44.2112	-41.4986	-45.0589	-38.7719	-45.0726	-41.636	-36.4378	-39.56	-38.4497	-41.759	-36.7053	-38.3588	-40.2851	-44.6134	-32.0128	-37.355	-29.7393	-32.4585	-33.784	-29.8929	-33.5103	-41.5029	-20.2448	-13.1092	-36.2416	-36.3641	-31.1967	-37.7416	-20.7801	-5.65892	-23.1428	-23.8601	-33.7459
Streptococcus gordonii str. Challis substr. CH1	-11.997	-11.793	-7.58284	-9.98191	-11.7337	-14.5378	-11.8222	-6.16622	-5.15917	-12.9947	-8.30416	-12.4823	-16.2527	-10.2944	-9.1356	-14.509	-11.7313	-11.8953	-12.3252	-10.0673	-14.3657	-11.1897	-14.9	-16.4262	-14.3244	-14.7456	-12.1329	-16.5792	-12.8404	-12.549	-8.42237	-11.6837	-10.1422	-7.89657	-8.25982	-9.36978	-17.1446	-18.6744	-17.3491	-15.5174	-15.6065	-11.7267	-11.5459	-15.1684	-9.59782	-5.10398	-13.0433	-12.6771	-10.2232
Streptococcus mutans UA159	-9.48637	-4.68324	-4.46147	-5.33119	-5.38568	-10.812	-10.1603	-8.04096	-7.08759	-8.36388	-7.40078	-7.50731	-12.0225	-4.0922	-5.99456	-2.69437	-9.5962	-7.68098	-8.8874	-4.74284	-8.02539	-6.14636	-6.75626	-4.52979	-5.43761	-6.00786	-5.92462	-3.15513	-8.82006	-9.81906	-0.260796	-14.4328	-5.99344	-0.807593	-3.20617	-3.30948	-11.2869	-15.1461	-14.1568	-11.7333	-10.4466	-11.5781	-13.3599	-12.0171	-7.0231	-4.37753	-12.577	-9.08984	-3.16513
Streptococcus pneumoniae D39	-11.6839	-20.5533	-20.3164	-12.4433	-23.1069	-13.4255	-26.7695	-14.9075	-12.9799	-19.9824	-9.91649	-20.4082	-24.8404	-18.8696	-22.8053	-27.1435	-25.3878	-25.4686	-24.5347	-19.482	-22.7506	-23.0089	-25.5742	-28.9649	-29.8775	-26.5264	-22.6997	-21.8406	-25.7036	-22.3739	-16.0933	-24.2236	-17.8393	-19.6903	-20.1015	-19.198	-17.2804	-25.761	-18.5212	-14.3169	-19.304	-28.4465	-22.2011	-24.8484	-17.1842	-4.99481	-16.7942	-14.2389	-19.056
Streptococcus pyogenes M1 GAS	-18.5468	-33.6432	-20.2706	-22.7627	-37.2766	-7.41648	-44.8211	-20.062	-18.2467	-39.0237	-12.374	-30.3384	-30.8045	-30.1142	-40.263	-35.7798	-38.5408	-35.9377	-36.1058	-33.7814	-37.9297	-35.7446	-37.1382	-35.7122	-36.6531	-36.6884	-28.956	-38.8321	-35.6112	-43.0075	-28.9774	-26.8978	-26.7846	-22.8607	-25.2834	-27.3211	-24.9241	-33.2987	-20.2135	-9.16399	-28.4839	-36.7041	-28.2742	-23.6336	-14.8499	-4.03469	-16.7132	-9.78655	-30.2095
Streptococcus sanguinis SK36	-12.2285	-12.2188	-9.93596	-8.41155	-9.43714	-13.0847	-12.7342	-6.64306	-5.49467	-14.764	-10.1983	-13.2316	-18.0263	-12.515	-13.2156	-14.9495	-14.6208	-16.2728	-16.9833	-13.7763	-17.0584	-14.0574	-14.0643	-13.3429	-16.2128	-14.3211	-12.3655	-16.5057	-14.7405	-15.4093	-8.81992	-15.3527	-14.6122	-13.2933	-13.5214	-11.6124	-17.9293	-20.661	-16.8833	-13.1988	-15.2535	-16.4136	-14.2276	-17.5014	-15.935	-5.70036	-11.1487	-12.9969	-13.4665
Streptococcus suis 05ZYH33	-18.0544	-29.6257	-33.3869	-18.1826	-35.7842	-12.5233	-36.5491	-31.0308	-29.9383	-36.6446	-10.5164	-27.9492	-36.2936	-34.0632	-31.8177	-37.0746	-36.3184	-35.7445	-37.3851	-31.1116	-37.4079	-34.7373	-36.6232	-42.2433	-43.1251	-38.3452	-32.9101	-39.7601	-33.3954	-38.2791	-31.2644	-37.6828	-33.0103	-31.7081	-31.9956	-29.0993	-29.5868	-37.9223	-20.9648	-15.5868	-36.5623	-36.6953	-36.5273	-35.9746	-24.7287	-11.1119	-26.0252	-26.8039	-28.9526
Streptococcus suis 98HAH33	-17.0399	-25.606	-31.3675	-15.1673	-31.7634	-11.5164	-31.5225	-27.0108	-25.919	-31.6187	-10.5079	-24.9328	-35.2723	-30.0447	-27.7999	-34.0507	-33.3016	-34.7252	-35.3647	-31.0908	-33.3871	-29.7204	-32.605	-38.217	-39.099	-37.3205	-29.8916	-34.7383	-31.3783	-34.2529	-27.2449	-35.6621	-28.9904	-26.6885	-30.9766	-27.0805	-28.57	-34.9003	-20.9535	-16.5793	-34.5415	-34.6743	-35.5064	-33.9555	-22.7138	-10.1048	-25.0114	-24.7891	-26.9338
Streptococcus thermophilus CNRZ1066	-11.7016	-9.57832	-12.3418	-6.46302	-14.1353	-11.434	-9.80007	-10.9325	-10.0044	-10.0128	-8.92722	-13.4328	-19.8665	-11.897	-12.8319	-12.1781	-16.4151	-13.4956	-14.565	-10.5101	-20.779	-12.0344	-17.6006	-15.9996	-13.9121	-15.5593	-14.7271	-15.8698	-16.7286	-13.4058	-11.1192	-20.2504	-16.8649	-13.715	-16.126	-13.2227	-14.3028	-19.7918	-16.5352	-16.3261	-19.3292	-22.4714	-20.2267	-20.8744	-16.2027	-8.00325	-15.8115	-13.2578	-14.0806
Streptomyces avermitilis MA-4680	-17.8574	-13.299	-12.4897	-7.94073	-18.2521	-11.7776	-22.5646	-10.4146	-9.76935	-27.6147	-12.3164	-18.9934	-12.8764	-20.4392	-22.6261	-26.2216	-21.746	-24.343	-24.9544	-21.5916	-19.8483	-18.5204	-22.7693	-26.0251	-26.5106	-24.7056	-22.8737	-13.4455	-17.7033	-28.1348	-14.7768	-16.1511	-18.294	-13.799	-18.2415	-18.2464	-12.4832	-20.9126	-8.78346	-12.0351	-10.6391	-15.9614	-13.2433	-17.1322	-15.9809	-11.8602	-15.8229	-9.44173	-18.8777
Streptomyces coelicolor A3(2)	-15.1158	-20.5901	-17.7607	-12.1623	-21.4649	-8.91015	-35.3148	-20.657	-17.9912	-37.1588	-12.4272	-17.1425	-16.2009	-17.6316	-22.7542	-26.4024	-22.8426	-20.4539	-23.0927	-19.7886	-21.031	-21.6376	-22.9073	-23.2588	-19.7489	-20.9429	-21.0329	-17.7135	-19.8744	-31.5155	-13.9455	-19.4533	-24.5615	-21.1115	-21.4905	-21.4867	-17.6696	-21.1088	-10.998	-13.1893	-16.9806	-17.4708	-16.584	-20.2962	-15.1727	-13.3118	-16.1042	-11.6725	-26.1052
Sulfurihydrogenibium sp. YO3AOP1	-9.03238	-0.343086	-0.988775	-5.3199	0.908261	-5.65392	-8.61928	-7.74537	-4.91821	-8.827	-2.67621	2.92469	-2.50625	-1.93716	4.94483	-0.777063	6.61728	0.279217	-0.00468139	-0.579763	1.25454	6.49752	4.08584	-4.69026	-0.627056	-0.619514	2.2254	1.32948	5.65408	-7.86306	1.30342	-1.64475	1.49788	1.45	1.02489	-1.02101	-1.56414	-1.19293	-6.60464	-4.41751	-5.15987	-4.37094	-3.96448	0.62674	-2.35837	-10.2649	-3.19619	-1.31361	1.09606
[truncated: 54 more rows]
[truncated: 10 more columns]

## Sheet: cellwall
Supplemental Table 6c: Residuals from the upper 95% CI for the COG cell wall and membrane biogenesis.
[truncated: 448 more rows]
[truncated: 11 more columns]

## Sheet: coenzyme
Supplemental Table 6d: Residuals from the upper 95% CI for the COG coenzyme transport and metabolism.
[truncated: 448 more rows]
[truncated: 10 more columns]

## Sheet: energy
Supplemental Table 6e: Residuals from the upper 95% CI for the COG energy production.
[truncated: 448 more rows]
[truncated: 10 more columns]

## Sheet: FunctionUnknown
Supplemental Table 6f: Residuals from the upper 95% CI for the COG function unknown.
[truncated: 448 more rows]
[truncated: 10 more columns]

[truncated: 9 more sheets: GeneralFunction, Inorganic Ion, Lipid, Nucleotide, Posttranslation, Replication, metabolites, Transcription, Translation]
